# Supplementary material
Source: Research Square preprint supplement (doi:10.21203/rs.3.rs-9485118/v1)
Supplement: Supplementary file 1 [file 256565f9cce738bad0b602bc.xlsx]

## Sheet: NX5948_publication_clinical_tab
Patient ID	Sex	FISH cytogenetics	IGHV status	Prior treatment status	ATAC-seq	RNA-seq
CLL1	F	13q-	Mutated	Untreated	Yes	Yes
CLL2	M	13q-	Mutated	Untreated	Yes	Yes
CLL3	M	Negative	Mutated	Untreated	Yes	Yes
CLL4	M	13q-	Mutated	Untreated	No	Yes
CLL5	M	11q-	Unmutated	Untreated	No	Yes
CLL6	M	Trisomy 12	Unmutated	Untreated	Yes	Yes
CLL7	NA	17p-	Mutated	Untreated	Yes	No
CLL8	NA	Negative	Unmutated	Untreated	Yes	No
