# Supplementary material
Source: Research Square preprint supplement (doi:10.21203/rs.3.rs-9485118/v1)
Supplement: Supplementary file 2 [file 836278bf54fa844f10fa52ef.xlsx]

## Sheet: plot06_ATAC_RNA.merged_peak_gen
GeneSymbol	peakID	ATAC_log2FC	ATAC_padj	RNA_log2FC	RNA_padj	abs_RNA_log2FC
A1BG	peak_0039503	-0.0873119	0.939833	0.0926209	1	0.0926209
A1BG-AS1	peak_0039502	-0.0267643	0.92848	0.15465	1	0.15465
A2M	peak_0016098	-0.19565	0.812217	0.355554	1	0.355554
A2M-AS1	peak_0016097	1.32845	0.221301	1.06246	1	1.06246
A2ML1	peak_0016085	0.230481	0.902304	-1.63048	0.961455	1.63048
A2ML1	peak_0016086	0.0670996	0.928882	-1.63048	0.961455	1.63048
A2ML1	peak_0016087	0.70313	0.611945	-1.63048	0.961455	1.63048
A2ML1	peak_0016088	0.735981	0.326646	-1.63048	0.961455	1.63048
A2ML1	peak_0016089	-0.3005	0.772881	-1.63048	0.961455	1.63048
A3GALT2	peak_0001844	0.099919	0.819688	1.75836	1	1.75836
A3GALT2	peak_0001845	0.0796594	0.912306	1.75836	1	1.75836
A3GALT2	peak_0001846	-0.229526	0.662214	1.75836	1	1.75836
A4GALT	peak_0050828	0.0913169	0.716016	-0.476315	1	0.476315
A4GALT	peak_0050829	0.480264	0.657488	-0.476315	1	0.476315
A4GALT	peak_0050830	0.444892	0.0762976	-0.476315	1	0.476315
A4GALT	peak_0050831	0.224109	0.833796	-0.476315	1	0.476315
A4GALT	peak_0050832	0.223825	0.828907	-0.476315	1	0.476315
A4GALT	peak_0050833	0.321808	0.55721	-0.476315	1	0.476315
A4GALT	peak_0050834	-0.0674723	0.935467	-0.476315	1	0.476315
A4GALT	peak_0050835	0.0950581	0.9333	-0.476315	1	0.476315
A4GALT	peak_0050836	0.516926	0.185755	-0.476315	1	0.476315
A4GALT	peak_0050837	-0.472806	0.00820258	-0.476315	1	0.476315
A4GALT	peak_0050838	0.0206156	0.975159	-0.476315	1	0.476315
AAAS	peak_0017600	-0.0704171	0.817334	-0.0902349	1	0.0902349
AAAS	peak_0017601	-0.0191778	0.95677	-0.0902349	1	0.0902349
AACS	peak_0020106	-0.0518233	0.888498	0.341003	0.986867	0.341003
AACS	peak_0020107	-0.0432605	0.86167	0.341003	0.986867	0.341003
AACS	peak_0020108	0.574472	0.27717	0.341003	0.986867	0.341003
AACS	peak_0020109	0.700001	0.131133	0.341003	0.986867	0.341003
AACS	peak_0020110	0.558064	0.486966	0.341003	0.986867	0.341003
AACS	peak_0020111	1.01042	0.359588	0.341003	0.986867	0.341003
AACSP1	peak_0064013	0.797172	0.467234	0	1	0
AACSP1	peak_0064014	0.551549	0.650614	0	1	0
AADACL2-AS1	peak_0055266	-0.998598	0.00064502	0.245026	1	0.245026
AADACL2-AS1	peak_0055267	-0.505864	0.543512	0.245026	1	0.245026
AADACL4	peak_0000658	-0.021546	0.98217	0	1	0
AAGAB	peak_0026147	-0.292111	0.465001	-0.519542	0.0018542	0.519542
AAGAB	peak_0026148	-0.0523413	0.866282	-0.519542	0.0018542	0.519542
AAK1	peak_0041671	0.572584	0.437023	-0.253462	0.607188	0.253462
AAMP	peak_0045161	-0.0409686	0.911393	-0.0432039	1	0.0432039
AANAT	peak_0033507	0.22783	0.518552	0.220031	1	0.220031
AANAT	peak_0033508	0.0389349	0.928731	0.220031	1	0.220031
AAR2	peak_0047038	0.281067	0.320343	-0.375256	0.092434	0.375256
AAR2	peak_0047039	0.204677	0.500717	-0.375256	0.092434	0.375256
AAR2	peak_0047040	-0.0543839	0.888986	-0.375256	0.092434	0.375256
AARS2	peak_0066135	-0.00497718	0.989439	-0.22777	0.236246	0.22777
AARSD1	peak_0032083	0.0946719	0.905589	-0.0487731	1	0.0487731
AARSD1	peak_0032084	-0.102206	0.692621	-0.0487731	1	0.0487731
AASDH	peak_0057903	-0.139266	0.739146	0.165946	0.327879	0.165946
AASDH	peak_0057904	0.128566	0.868482	0.165946	0.327879	0.165946
AASDH	peak_0057905	-0.058652	0.869396	0.165946	0.327879	0.165946
AASS	peak_0072363	0.460666	0.698597	-0.860768	1	0.860768
AASS	peak_0072364	-0.143078	0.824893	-0.860768	1	0.860768
AATBC	peak_0049161	-0.777456	0.146217	-0.919305	0.291268	0.919305
AATBC	peak_0049162	-0.196974	0.454652	-0.919305	0.291268	0.919305
AATBC	peak_0049163	0.00623408	0.989236	-0.919305	0.291268	0.919305
ABALON	peak_0046763	-0.119005	0.753977	-1.17015	8.87082e-08	1.17015
ABALON	peak_0046764	-0.337943	0.479003	-1.17015	8.87082e-08	1.17015
ABALON	peak_0046765	-0.391819	0.430832	-1.17015	8.87082e-08	1.17015
ABALON	peak_0046766	-2.00694	5.42814e-07	-1.17015	8.87082e-08	1.17015
ABAT	peak_0027757	-0.36081	0.611318	-0.035431	1	0.035431
ABAT	peak_0027758	-0.105221	0.914423	-0.035431	1	0.035431
ABAT	peak_0027759	0.0535779	0.845247	-0.035431	1	0.035431
ABAT	peak_0027760	-0.569582	0.0680188	-0.035431	1	0.035431
ABAT	peak_0027761	-0.16789	0.770777	-0.035431	1	0.035431
ABAT	peak_0027762	-0.171155	0.697327	-0.035431	1	0.035431
ABAT	peak_0027763	0.109689	0.878042	-0.035431	1	0.035431
ABAT	peak_0027764	0.471077	0.00891572	-0.035431	1	0.035431
ABCA1	peak_0078990	-0.279747	0.548377	1.62538	0.182978	1.62538
ABCA1	peak_0078991	-0.141421	0.792489	1.62538	0.182978	1.62538
ABCA1	peak_0078992	0.210766	0.443123	1.62538	0.182978	1.62538
ABCA1	peak_0078993	0.234665	0.713121	1.62538	0.182978	1.62538
ABCA1	peak_0078994	0.131776	0.855276	1.62538	0.182978	1.62538
ABCA1	peak_0078995	0.997685	1.1761e-06	1.62538	0.182978	1.62538
ABCA1	peak_0078996	0.399374	0.0309068	1.62538	0.182978	1.62538
ABCA1	peak_0078997	0.278515	0.158653	1.62538	0.182978	1.62538
ABCA1	peak_0078998	0.223144	0.730818	1.62538	0.182978	1.62538
ABCA1	peak_0078999	0.0847891	0.802093	1.62538	0.182978	1.62538
ABCA1	peak_0079000	0.805328	0.43188	1.62538	0.182978	1.62538
ABCA1	peak_0079001	0.301696	0.0626631	1.62538	0.182978	1.62538
ABCA1	peak_0079002	0.316042	0.859154	1.62538	0.182978	1.62538
ABCA11P	peak_0056612	0.00353511	0.994	0.0957457	1	0.0957457
ABCA11P	peak_0056613	-0.231103	0.605109	0.0957457	1	0.0957457
ABCA11P	peak_0056614	-0.0473289	0.928564	0.0957457	1	0.0957457
ABCA12	peak_0045098	-0.866009	0.334316	0.377792	1	0.377792
ABCA12	peak_0045099	1.44621	0.13329	0.377792	1	0.377792
ABCA12	peak_0045100	-0.0120373	0.994674	0.377792	1	0.377792
ABCA12	peak_0045101	0.247241	0.802763	0.377792	1	0.377792
ABCA13	peak_0070644	0.397137	0.741781	0.605698	1	0.605698
ABCA13	peak_0070645	0.760394	0.292735	0.605698	1	0.605698
ABCA13	peak_0070646	0.511009	0.722226	0.605698	1	0.605698
ABCA13	peak_0070647	0.166575	0.884933	0.605698	1	0.605698
ABCA2	peak_0080429	0.0623003	0.836654	0.46719	1	0.46719
ABCA2	peak_0080430	0.0457801	0.890861	0.46719	1	0.46719
ABCA2	peak_0080431	-0.210787	0.684611	0.46719	1	0.46719
ABCA3	peak_0027555	-0.649344	0.506346	0.2962	1	0.2962
ABCA3	peak_0027556	0.074521	0.718075	0.2962	1	0.2962
ABCA4	peak_0003553	-0.0474569	0.975639	0	1	0
ABCA4	peak_0003554	0.367828	0.771421	0	1	0
ABCA5	peak_0033217	-0.0974187	0.700396	0.388904	0.813386	0.388904
ABCA5	peak_0033218	0.362576	0.620735	0.388904	0.813386	0.388904
ABCA5	peak_0033219	-0.317247	0.786794	0.388904	0.813386	0.388904
ABCA6	peak_0033209	0.136017	0.777223	-0.771855	0.014723	0.771855
ABCA6	peak_0033210	0.537197	0.54173	-0.771855	0.014723	0.771855
ABCA6	peak_0033211	-0.110442	0.818169	-0.771855	0.014723	0.771855
ABCA6	peak_0033212	-0.545929	0.22729	-0.771855	0.014723	0.771855
ABCA6	peak_0033213	-0.0868585	0.916238	-0.771855	0.014723	0.771855
ABCA7	peak_0036039	-0.0314102	0.909508	0.963879	0.0026561	0.963879
ABCA7	peak_0036040	-0.045533	0.886143	0.963879	0.0026561	0.963879
ABCA7	peak_0036041	0.0368976	0.905549	0.963879	0.0026561	0.963879
ABCA7	peak_0036042	0.366369	0.201011	0.963879	0.0026561	0.963879
ABCA7	peak_0036043	0.694075	0.0320165	0.963879	0.0026561	0.963879
ABCA8	peak_0033191	0.0631329	0.929477	-0.0446276	1	0.0446276
ABCA8	peak_0033192	0.559294	0.658923	-0.0446276	1	0.0446276
ABCA8	peak_0033193	0.355636	0.772992	-0.0446276	1	0.0446276
ABCA8	peak_0033194	-0.0220565	0.976036	-0.0446276	1	0.0446276
ABCA8	peak_0033195	0.305352	0.743683	-0.0446276	1	0.0446276
ABCA8	peak_0033196	-0.0395609	0.973252	-0.0446276	1	0.0446276
ABCA8	peak_0033197	0.2419	0.811814	-0.0446276	1	0.0446276
ABCA8	peak_0033198	-0.211052	0.872078	-0.0446276	1	0.0446276
ABCA9	peak_0033199	0.605106	0.586811	-0.192526	1	0.192526
ABCA9	peak_0033200	-0.204631	0.837396	-0.192526	1	0.192526
ABCA9	peak_0033201	0.326766	0.449854	-0.192526	1	0.192526
ABCA9	peak_0033202	0.650268	1.36774e-05	-0.192526	1	0.192526
ABCB1	peak_0071365	-0.0467532	0.943617	0.507348	1	0.507348
ABCB1	peak_0071366	-0.162648	0.418456	0.507348	1	0.507348
ABCB1	peak_0071368	0.92831	0.0896096	0.507348	1	0.507348
ABCB10	peak_0007344	-0.575928	0.0115721	-0.0637682	1	0.0637682
ABCB10	peak_0007345	-0.110862	0.880193	-0.0637682	1	0.0637682
ABCB10	peak_0007346	-0.102515	0.710871	-0.0637682	1	0.0637682
ABCB10	peak_0007347	-0.120531	0.909566	-0.0637682	1	0.0637682
ABCB10	peak_0007348	-0.054175	0.944157	-0.0637682	1	0.0637682
ABCB10	peak_0007349	-0.0430957	0.896522	-0.0637682	1	0.0637682
ABCB11	peak_0043969	-0.294792	0.659018	-1.02018	1	1.02018
ABCB11	peak_0043970	-0.099473	0.902606	-1.02018	1	1.02018
ABCB11	peak_0043971	-0.260179	0.886431	-1.02018	1	1.02018
ABCB4	peak_0071359	-0.0778159	0.911967	-0.288408	0.971929	0.288408
ABCB4	peak_0071360	-0.378602	0.382689	-0.288408	0.971929	0.288408
ABCB4	peak_0071361	-0.150194	0.754068	-0.288408	0.971929	0.288408
ABCB4	peak_0071362	-0.326314	0.0849747	-0.288408	0.971929	0.288408
ABCB4	peak_0071363	0.299796	0.302631	-0.288408	0.971929	0.288408
ABCB4	peak_0071364	0.396795	0.516285	-0.288408	0.971929	0.288408
ABCB5	peak_0069801	0.208806	0.860102	0	1	0
ABCB6	peak_0045216	-0.0604671	0.829637	-0.341025	1	0.341025
ABCB7	peak_0082038	-0.111172	0.811119	0.0101132	1	0.0101132
ABCB8	peak_0073126	-0.0193142	0.962173	-0.0183162	1	0.0183162
ABCB9	peak_0019948	0.0894744	0.948717	-0.118358	1	0.118358
ABCB9	peak_0019949	-0.699934	0.429126	-0.118358	1	0.118358
ABCB9	peak_0019950	-0.175676	0.736432	-0.118358	1	0.118358
ABCB9	peak_0019951	-0.15227	0.611318	-0.118358	1	0.118358
ABCB9	peak_0019952	0.168644	0.319467	-0.118358	1	0.118358
ABCC1	peak_0028075	0.126867	0.879638	0.0691554	1	0.0691554
ABCC1	peak_0030356	-0.172114	0.943423	0.0691554	1	0.0691554
ABCC10	peak_0066074	-0.124049	0.542289	0.0743118	1	0.0743118
ABCC11	peak_0028891	0.0835695	0.73076	-0.289579	0.603889	0.289579
ABCC12	peak_0028888	0.307067	0.635449	-0.836986	1	0.836986
ABCC12	peak_0028889	-0.211428	0.805296	-0.836986	1	0.836986
ABCC12	peak_0028890	-0.339995	0.45762	-0.836986	1	0.836986
ABCC2	peak_0010715	-0.263511	0.78249	0.958834	0.0450895	0.958834
ABCC2	peak_0010716	-0.22493	0.753377	0.958834	0.0450895	0.958834
ABCC2	peak_0010717	-0.0347659	0.971368	0.958834	0.0450895	0.958834
ABCC2	peak_0010718	-0.116888	0.76722	0.958834	0.0450895	0.958834
ABCC3	peak_0032507	-0.0860593	0.888661	-1.14442	1	1.14442
ABCC3	peak_0032508	0.606972	0.160856	-1.14442	1	1.14442
ABCC4	peak_0021804	-0.331044	0.306372	-0.47642	0.390461	0.47642
ABCC4	peak_0021805	-0.593938	0.342345	-0.47642	0.390461	0.47642
ABCC4	peak_0021806	-0.161405	0.328185	-0.47642	0.390461	0.47642
ABCC5	peak_0055869	0.028438	0.92984	0.0942679	1	0.0942679
ABCC5-AS1	peak_0055867	1.09074	0.156008	0.439715	1	0.439715
ABCC5-AS1	peak_0055868	0.156143	0.601543	0.439715	1	0.439715
ABCC6	peak_0028076	-0.969051	0.0961257	0.569615	1	0.569615
ABCC8	peak_0012370	0.234505	0.798742	0.623876	1	0.623876
ABCC8	peak_0012371	0.601586	0.374038	0.623876	1	0.623876
ABCC8	peak_0012372	0.238953	0.71331	0.623876	1	0.623876
ABCC8	peak_0012373	0.458562	0.725318	0.623876	1	0.623876
ABCC8	peak_0012374	0.388447	0.301147	0.623876	1	0.623876
ABCC8	peak_0012375	-0.0480186	0.915879	0.623876	1	0.623876
ABCD1	peak_0082811	-0.00841233	0.979927	0.805499	0.127798	0.805499
ABCD1	peak_0082812	-0.0131323	0.987061	0.805499	0.127798	0.805499
ABCD1	peak_0082813	0.558288	0.34843	0.805499	0.127798	0.805499
ABCD2	peak_0016948	-0.0119966	0.989356	0.0611559	1	0.0611559
ABCD2	peak_0016949	-0.150761	0.606043	0.0611559	1	0.0611559
ABCD2	peak_0016950	-0.253436	0.530123	0.0611559	1	0.0611559
ABCD3	peak_0003557	-0.562917	0.160746	-0.164643	0.969942	0.164643
ABCD3	peak_0003558	-0.00571541	0.986689	-0.164643	0.969942	0.164643
ABCD4	peak_0023922	-0.0751804	0.778046	0.348349	0.075242	0.348349
ABCE1	peak_0059318	-0.208168	0.202057	-1.10717	1.05359e-05	1.10717
ABCF3	peak_0055878	-0.012011	0.973032	0.0130713	1	0.0130713
ABCG1	peak_0049062	-0.283275	0.306569	1.05537	0.147083	1.05537
ABCG1	peak_0049063	1.10541	0.125257	1.05537	0.147083	1.05537
ABCG1	peak_0049064	0.261625	0.333631	1.05537	0.147083	1.05537
ABCG1	peak_0049065	-0.247614	0.239226	1.05537	0.147083	1.05537
ABCG1	peak_0049066	0.31541	0.0177135	1.05537	0.147083	1.05537
ABCG1	peak_0049067	0.297993	0.193094	1.05537	0.147083	1.05537
ABCG1	peak_0049068	0.192786	0.374927	1.05537	0.147083	1.05537
ABCG1	peak_0049069	0.401476	0.0100984	1.05537	0.147083	1.05537
ABCG1	peak_0049070	0.0210545	0.974232	1.05537	0.147083	1.05537
ABCG1	peak_0049071	0.12488	0.823793	1.05537	0.147083	1.05537
ABCG1	peak_0049072	0.428246	0.294354	1.05537	0.147083	1.05537
ABCG1	peak_0049073	0.880002	0.249409	1.05537	0.147083	1.05537
ABCG1	peak_0049074	-0.245645	0.488826	1.05537	0.147083	1.05537
ABCG1	peak_0049075	-0.28662	0.621167	1.05537	0.147083	1.05537
ABCG1	peak_0049076	0.191558	0.583418	1.05537	0.147083	1.05537
ABCG1	peak_0049077	0.650096	0.408496	1.05537	0.147083	1.05537
ABCG2	peak_0058477	0.134465	0.843763	2.19568	1	2.19568
ABCG2	peak_0058478	-0.189135	0.803673	2.19568	1	2.19568
ABCG2	peak_0058479	0.16225	0.790183	2.19568	1	2.19568
ABCG2	peak_0058480	0.0283708	0.975182	2.19568	1	2.19568
ABCG4	peak_0015201	0.00715455	0.990243	0.756127	1	0.756127
ABCG4	peak_0015202	0.375564	0.537463	0.756127	1	0.756127
ABCG4	peak_0015203	0.112559	0.774845	0.756127	1	0.756127
ABCG4	peak_0015204	0.243095	0.562515	0.756127	1	0.756127
ABCG5	peak_0040848	0.436733	0.693572	0.245028	1	0.245028
ABCG8	peak_0040849	0.238903	0.812704	-0.806216	1	0.806216
ABHD1	peak_0040316	0.153912	0.459953	0.486894	0.236925	0.486894
ABHD10	peak_0054103	0.173351	0.946454	-0.0667525	1	0.0667525
ABHD10	peak_0054104	0.190428	0.692078	-0.0667525	1	0.0667525
ABHD10	peak_0054105	-0.0811461	0.748813	-0.0667525	1	0.0667525
ABHD11	peak_0071064	-0.0669066	0.769556	-0.127082	1	0.127082
ABHD11	peak_0071065	0.0355645	0.949329	-0.127082	1	0.127082
ABHD11-AS1	peak_0071063	-0.00810482	0.986452	-0.0841021	1	0.0841021
ABHD12	peak_0046673	0.426431	0.636947	-0.170322	1	0.170322
ABHD12	peak_0046674	0.0584351	0.93136	-0.170322	1	0.170322
ABHD12	peak_0046675	-0.0786669	0.816019	-0.170322	1	0.170322
ABHD12B	peak_0023026	0.120198	0.631803	-0.891388	1	0.891388
ABHD12B	peak_0023027	0.154801	0.702259	-0.891388	1	0.891388
ABHD12B	peak_0023028	0.137822	0.905448	-0.891388	1	0.891388
ABHD13	peak_0022053	0.0563662	0.827519	0.0923728	1	0.0923728
ABHD13	peak_0022054	-0.585955	0.135849	0.0923728	1	0.0923728
ABHD14B	peak_0053018	-0.0927554	0.636713	0.0982757	1	0.0982757
ABHD15	peak_0031476	0.234835	0.779651	0.647618	2.07576e-05	0.647618
ABHD15	peak_0031477	0.347168	0.316218	0.647618	2.07576e-05	0.647618
ABHD15	peak_0031478	-0.241624	0.462798	0.647618	2.07576e-05	0.647618
ABHD15	peak_0031479	0.558226	0.0308467	0.647618	2.07576e-05	0.647618
ABHD15	peak_0031480	1.10363	1.2423e-05	0.647618	2.07576e-05	0.647618
ABHD15	peak_0031481	0.00412159	0.989413	0.647618	2.07576e-05	0.647618
ABHD16B	peak_0048263	-0.960458	0.000139579	0.0755333	1	0.0755333
ABHD16B	peak_0048264	0.140272	0.869993	0.0755333	1	0.0755333
ABHD16B	peak_0048265	0.292981	0.495662	0.0755333	1	0.0755333
ABHD17A	peak_0036155	-0.0925352	0.629918	-0.00793113	1	0.00793113
ABHD17A	peak_0036156	-0.603408	0.000889191	-0.00793113	1	0.00793113
ABHD17A	peak_0036157	-0.11212	0.68236	-0.00793113	1	0.00793113
ABHD17B	peak_0078149	-0.0295666	0.965828	0.0684857	1	0.0684857
ABHD17B	peak_0078150	0.283077	0.657779	0.0684857	1	0.0684857
ABHD17B	peak_0078151	0.115301	0.914758	0.0684857	1	0.0684857
ABHD17B	peak_0078152	-0.11867	0.72682	0.0684857	1	0.0684857
ABHD17C	peak_0026729	-0.106582	0.684612	-0.497913	0.919658	0.497913
ABHD18	peak_0059069	-0.0354807	0.899562	0.194385	0.194701	0.194385
ABHD2	peak_0026968	0.562113	0.65836	0.0538748	1	0.0538748
ABHD2	peak_0026969	-0.136036	0.887421	0.0538748	1	0.0538748
ABHD2	peak_0026970	0.227297	0.744511	0.0538748	1	0.0538748
ABHD2	peak_0026971	0.0218564	0.954156	0.0538748	1	0.0538748
ABHD2	peak_0026972	0.47646	0.500937	0.0538748	1	0.0538748
ABHD2	peak_0026973	0.0817166	0.920381	0.0538748	1	0.0538748
ABHD3	peak_0034537	0.41238	0.486508	0.465211	0.0441612	0.465211
ABHD3	peak_0034542	-0.110811	0.881665	0.465211	0.0441612	0.465211
ABHD3	peak_0034543	0.061718	0.829175	0.465211	0.0441612	0.465211
ABHD4	peak_0022466	0.0201261	0.945952	-0.0606893	1	0.0606893
ABHD5	peak_0052602	0.946937	0.343131	0.00687068	1	0.00687068
ABHD5	peak_0052603	0.513362	0.785424	0.00687068	1	0.00687068
ABHD5	peak_0052604	-0.0687935	0.784168	0.00687068	1	0.00687068
ABHD6	peak_0053267	-0.318649	0.645849	-0.47764	0.685959	0.47764
ABHD6	peak_0053268	-0.0381642	0.882665	-0.47764	0.685959	0.47764
ABHD6	peak_0053269	-0.539299	0.295777	-0.47764	0.685959	0.47764
ABHD8	peak_0037439	-0.0485802	0.857576	0.499791	0.519742	0.499791
ABHD8	peak_0037440	-0.121829	0.656604	0.499791	0.519742	0.499791
ABI1	peak_0008754	0.0859095	0.758422	-0.163475	0.917173	0.163475
ABI1	peak_0008755	-0.0801564	0.91663	-0.163475	0.917173	0.163475
ABI1	peak_0008756	-0.294578	0.644453	-0.163475	0.917173	0.163475
ABI1	peak_0008757	-0.0925467	0.741629	-0.163475	0.917173	0.163475
ABI1	peak_0008758	0.486518	0.118371	-0.163475	0.917173	0.163475
ABI1	peak_0008759	-0.0817876	0.944081	-0.163475	0.917173	0.163475
ABI1	peak_0008760	0.206663	0.811418	-0.163475	0.917173	0.163475
ABI1	peak_0008761	-0.312523	0.806055	-0.163475	0.917173	0.163475
ABI1	peak_0008762	-0.377962	0.705667	-0.163475	0.917173	0.163475
ABI1	peak_0008763	0.246421	0.839012	-0.163475	0.917173	0.163475
ABI1	peak_0008764	0.0710303	0.908462	-0.163475	0.917173	0.163475
ABI1	peak_0008765	0.438902	0.508227	-0.163475	0.917173	0.163475
ABI1	peak_0008766	-0.0546271	0.940783	-0.163475	0.917173	0.163475
ABI1	peak_0008767	0.197282	0.8813	-0.163475	0.917173	0.163475
ABI1	peak_0008768	-0.0191632	0.949377	-0.163475	0.917173	0.163475
ABI1	peak_0008769	-0.139299	0.704801	-0.163475	0.917173	0.163475
ABI1	peak_0008770	0.0867217	0.931598	-0.163475	0.917173	0.163475
ABI1	peak_0008771	-0.161827	0.779568	-0.163475	0.917173	0.163475
ABI1	peak_0008772	0.482878	0.727219	-0.163475	0.917173	0.163475
ABI1	peak_0008773	-0.157844	0.653716	-0.163475	0.917173	0.163475
ABI2	peak_0044886	-0.0168148	0.948706	0.14539	0.96748	0.14539
ABI2	peak_0044887	0.175706	0.87393	0.14539	0.96748	0.14539
ABI3	peak_0032407	0.0695564	0.845268	0.317901	1	0.317901
ABI3	peak_0032408	0.32752	0.432209	0.317901	1	0.317901
ABI3	peak_0032409	-0.105917	0.860241	0.317901	1	0.317901
ABI3	peak_0032410	-0.0968182	0.705639	0.317901	1	0.317901
ABITRAM	peak_0079094	-0.00907058	0.96524	-0.256543	0.73339	0.256543
ABL1	peak_0080046	0.6578	0.4031	-0.217792	0.50976	0.217792
ABL1	peak_0080047	-0.137344	0.526215	-0.217792	0.50976	0.217792
ABL1	peak_0080048	-0.131698	0.900616	-0.217792	0.50976	0.217792
ABL1	peak_0080049	0.261438	0.725881	-0.217792	0.50976	0.217792
ABL1	peak_0080050	-0.249207	0.727097	-0.217792	0.50976	0.217792
ABL1	peak_0080051	-0.492953	0.0699466	-0.217792	0.50976	0.217792
ABL2	peak_0005825	-0.235729	0.249656	0.126269	1	0.126269
ABL2	peak_0005826	-0.363963	0.748855	0.126269	1	0.126269
ABL2	peak_0005827	-0.265449	0.647003	0.126269	1	0.126269
ABL2	peak_0005828	-0.0347166	0.899524	0.126269	1	0.126269
ABLIM1	peak_0011196	-0.0847582	0.853303	0.0499204	1	0.0499204
ABLIM1	peak_0011197	0.285792	0.221986	0.0499204	1	0.0499204
ABLIM1	peak_0011198	-0.179252	0.432519	0.0499204	1	0.0499204
ABLIM1	peak_0011199	-0.0148282	0.97183	0.0499204	1	0.0499204
ABLIM1	peak_0011200	0.346106	0.240988	0.0499204	1	0.0499204
ABLIM1	peak_0011201	0.452372	0.00532273	0.0499204	1	0.0499204
ABLIM1	peak_0011202	0.318978	0.774742	0.0499204	1	0.0499204
ABLIM1	peak_0011203	-0.266025	0.57124	0.0499204	1	0.0499204
ABLIM1	peak_0011204	0.387592	0.409014	0.0499204	1	0.0499204
ABLIM1	peak_0011205	-0.0982762	0.903302	0.0499204	1	0.0499204
ABLIM2	peak_0056948	0.484084	0.547222	0.976802	0.299741	0.976802
ABLIM2	peak_0056949	0.0502909	0.853936	0.976802	0.299741	0.976802
ABLIM2	peak_0056950	-0.384662	0.0192655	0.976802	0.299741	0.976802
ABLIM2	peak_0056951	-0.199052	0.554526	0.976802	0.299741	0.976802
ABO	peak_0080206	0.132392	0.837732	-2.4956	1	2.4956
ABO	peak_0080207	0.20389	0.830391	-2.4956	1	2.4956
ABO	peak_0080208	0.654899	0.626431	-2.4956	1	2.4956
ABR	peak_0030384	0.327105	0.121031	0.496058	0.341209	0.496058
ABR	peak_0030385	0.539189	0.115233	0.496058	0.341209	0.496058
ABR	peak_0030386	0.27482	0.24896	0.496058	0.341209	0.496058
ABR	peak_0030387	-0.288352	0.582371	0.496058	0.341209	0.496058
ABR	peak_0030388	-0.250091	0.697137	0.496058	0.341209	0.496058
ABR	peak_0030389	0.200606	0.512721	0.496058	0.341209	0.496058
ABR	peak_0030390	0.359519	0.120977	0.496058	0.341209	0.496058
ABR	peak_0030391	-0.301587	0.300234	0.496058	0.341209	0.496058
ABR	peak_0030392	0.0624769	0.800409	0.496058	0.341209	0.496058
ABR	peak_0034059	-0.479833	0.33768	0.496058	0.341209	0.496058
ABRA	peak_0076011	0.779025	0.268939	-2.49774	0.487631	2.49774
ABRA	peak_0076012	0.624035	0.56948	-2.49774	0.487631	2.49774
ABRA	peak_0076013	0.204184	0.79567	-2.49774	0.487631	2.49774
ABRA	peak_0076014	-0.0276138	0.95586	-2.49774	0.487631	2.49774
ABRA	peak_0076015	0.438676	0.155983	-2.49774	0.487631	2.49774
ABRA	peak_0076016	-0.565944	0.350035	-2.49774	0.487631	2.49774
ABRA	peak_0076017	0.3931	0.710967	-2.49774	0.487631	2.49774
ABRA	peak_0076018	-0.373072	0.504181	-2.49774	0.487631	2.49774
ABRACL	peak_0067949	0.00225672	0.996223	-1.29868	1.70744e-06	1.29868
ABRACL	peak_0067950	-0.11246	0.726528	-1.29868	1.70744e-06	1.29868
ABRACL	peak_0067951	0.0745651	0.876747	-1.29868	1.70744e-06	1.29868
ABRAXAS1	peak_0058332	-0.0146807	0.967459	-0.145009	0.873433	0.145009
ABRAXAS1	peak_0058333	0.0197502	0.983967	-0.145009	0.873433	0.145009
ABRAXAS2	peak_0011509	-0.156961	0.495508	-0.224165	0.398854	0.224165
ABRAXAS2	peak_0011510	-0.250133	0.670164	-0.224165	0.398854	0.224165
ABT1	peak_0065397	-0.13148	0.693037	-0.210364	0.38409	0.210364
ABT1	peak_0065398	-0.00915625	0.977061	-0.210364	0.38409	0.210364
ABT1	peak_0065399	-0.958722	0.271598	-0.210364	0.38409	0.210364
ABT1	peak_0065400	0.0341376	0.93724	-0.210364	0.38409	0.210364
ABT1	peak_0065401	-0.39221	0.511937	-0.210364	0.38409	0.210364
ABTB1	peak_0054660	0.32798	0.513673	0.843808	0.0285133	0.843808
ABTB1	peak_0054661	0.369753	0.728767	0.843808	0.0285133	0.843808
ABTB1	peak_0054662	0.0141638	0.953933	0.843808	0.0285133	0.843808
ABTB1	peak_0054663	0.244623	0.631959	0.843808	0.0285133	0.843808
ABTB1	peak_0054664	0.398575	0.141083	0.843808	0.0285133	0.843808
ABTB1	peak_0054665	0.261896	0.358269	0.843808	0.0285133	0.843808
ABTB2	peak_0012566	-0.460577	0.693572	-1.21229	0.0104232	1.21229
ABTB2	peak_0012567	-0.38069	0.0297095	-1.21229	0.0104232	1.21229
ABTB2	peak_0012568	0.15229	0.762809	-1.21229	0.0104232	1.21229
ABTB2	peak_0012569	0.201976	0.515523	-1.21229	0.0104232	1.21229
ABTB2	peak_0012570	-0.167222	0.200161	-1.21229	0.0104232	1.21229
ACAA1	peak_0052412	-0.18534	0.895555	0.151241	0.900948	0.151241
ACAA1	peak_0052413	0.262933	0.403179	0.151241	0.900948	0.151241
ACAA1	peak_0052414	0.105733	0.808151	0.151241	0.900948	0.151241
ACAA1	peak_0052415	0.00231039	0.994616	0.151241	0.900948	0.151241
ACAA2	peak_0035068	0.652392	0.562112	-0.25762	0.297675	0.25762
ACAA2	peak_0035069	0.392643	0.76881	-0.25762	0.297675	0.25762
ACAA2	peak_0035070	-0.0164554	0.956927	-0.25762	0.297675	0.25762
ACACB	peak_0019222	0.114636	0.862446	0.995607	0.33184	0.995607
ACACB	peak_0019223	0.0649611	0.779012	0.995607	0.33184	0.995607
ACAD10	peak_0019380	-0.0300261	0.925586	0.12438	1	0.12438
ACAD10	peak_0019381	0.262691	0.837077	0.12438	1	0.12438
ACAD11	peak_0054835	-0.0277757	0.923037	0.424334	0.541406	0.424334
ACAD9	peak_0054718	-0.0874269	0.661715	-0.500187	0.000323926	0.500187
ACAD9	peak_0054719	-0.2657	0.416021	-0.500187	0.000323926	0.500187
ACADL	peak_0045047	0.629945	0.650104	-0.908485	1	0.908485
ACADM	peak_0003070	-0.417313	0.590749	-0.382143	0.0756483	0.382143
ACADM	peak_0003071	1.03436	0.0271593	-0.382143	0.0756483	0.382143
ACADM	peak_0003072	-0.060484	0.830504	-0.382143	0.0756483	0.382143
ACADM	peak_0003073	-0.267942	0.374038	-0.382143	0.0756483	0.382143
ACADM	peak_0003074	-0.571564	0.0586182	-0.382143	0.0756483	0.382143
ACADS	peak_0019747	0.00558281	0.98566	0.0903974	1	0.0903974
ACADS	peak_0019748	-0.0343364	0.974001	0.0903974	1	0.0903974
ACADS	peak_0019749	-0.477488	0.213071	0.0903974	1	0.0903974
ACADS	peak_0019750	0.150602	0.911369	0.0903974	1	0.0903974
ACADSB	peak_0011395	-0.198217	0.800641	0.321424	0.193202	0.321424
ACADVL	peak_0030759	-0.0506559	0.862784	-0.111397	1	0.111397
ACAN	peak_0026961	-0.0267284	0.968534	0	1	0
ACAN	peak_0026962	0.297939	0.767725	0	1	0
ACAP1	peak_0030779	0.244894	0.104028	-0.26263	1	0.26263
ACAP1	peak_0030780	0.178224	0.836757	-0.26263	1	0.26263
ACAP2	peak_0056400	-0.00620831	0.990652	0.180133	0.813568	0.180133
ACAP2	peak_0056401	-0.103934	0.902897	0.180133	0.813568	0.180133
ACAP2	peak_0056402	-0.195328	0.661715	0.180133	0.813568	0.180133
ACAP2	peak_0056403	0.387386	0.580193	0.180133	0.813568	0.180133
ACAP2	peak_0056404	-0.327195	0.601662	0.180133	0.813568	0.180133
ACAP2	peak_0056405	0.0267683	0.940802	0.180133	0.813568	0.180133
ACAP2	peak_0056406	0.271401	0.49026	0.180133	0.813568	0.180133
ACAT1	peak_0014787	-0.0204312	0.94847	-0.427303	0.257427	0.427303
ACAT1	peak_0014788	-1.49518	0.00154971	-0.427303	0.257427	0.427303
ACAT1	peak_0014789	-0.0711108	0.832076	-0.427303	0.257427	0.427303
ACBD3	peak_0007169	0.0252641	0.958369	0.322986	0.472785	0.322986
ACBD3	peak_0007170	-0.0709622	0.80479	0.322986	0.472785	0.322986
ACBD3	peak_0007171	-0.0945488	0.793269	0.322986	0.472785	0.322986
ACBD3	peak_0007172	0.335661	0.755544	0.322986	0.472785	0.322986
ACBD3-AS1	peak_0007161	0.558081	0.0442896	0.296373	0.642426	0.296373
ACBD3-AS1	peak_0007162	0.0238467	0.924383	0.296373	0.642426	0.296373
ACBD3-AS1	peak_0007163	0.590688	0.00235227	0.296373	0.642426	0.296373
ACBD3-AS1	peak_0007164	0.206054	0.297469	0.296373	0.642426	0.296373
ACBD3-AS1	peak_0007165	0.342196	0.169405	0.296373	0.642426	0.296373
ACBD3-AS1	peak_0007166	0.320692	0.56217	0.296373	0.642426	0.296373
ACBD3-AS1	peak_0007167	0.272354	0.468354	0.296373	0.642426	0.296373
ACBD3-AS1	peak_0007168	-0.00657984	0.994616	0.296373	0.642426	0.296373
ACBD4	peak_0032221	-0.0387032	0.867949	0.496335	0.1221	0.496335
ACBD4	peak_0032222	-0.0779187	0.800804	0.496335	0.1221	0.496335
ACBD5	peak_0008780	-0.039194	0.888079	0.0372367	1	0.0372367
ACBD6	peak_0005860	-0.197292	0.362585	-0.353365	0.0447882	0.353365
ACBD6	peak_0005861	0.0692068	0.918497	-0.353365	0.0447882	0.353365
ACBD6	peak_0005862	0.127173	0.881094	-0.353365	0.0447882	0.353365
ACCS	peak_0012709	-0.0674683	0.826687	0.342732	1	0.342732
ACCSL	peak_0012707	-0.404837	0.829829	0.605699	1	0.605699
ACCSL	peak_0012708	0.358847	0.856761	0.605699	1	0.605699
ACD	peak_0029304	0.0490095	0.84522	0.180932	0.655471	0.180932
ACE	peak_0032899	-0.477063	0.0584142	3.18389	0.456402	3.18389
ACE	peak_0032900	0.241958	0.54554	3.18389	0.456402	3.18389
ACE	peak_0032901	-0.17322	0.769047	3.18389	0.456402	3.18389
ACER1	peak_0036579	0.723447	0.44619	-0.863701	1	0.863701
ACER2	peak_0077355	-0.695304	0.657954	0.505254	0.447769	0.505254
ACER2	peak_0077356	0.139297	0.472296	0.505254	0.447769	0.505254
ACER2	peak_0077357	0.90909	0.20908	0.505254	0.447769	0.505254
ACER2	peak_0077358	0.187314	0.913553	0.505254	0.447769	0.505254
ACER2	peak_0077359	-0.176436	0.683646	0.505254	0.447769	0.505254
ACER2	peak_0077360	0.458893	0.568588	0.505254	0.447769	0.505254
ACER2	peak_0077361	-0.359037	0.168284	0.505254	0.447769	0.505254
ACER2	peak_0077362	0.0541957	0.917622	0.505254	0.447769	0.505254
ACER2	peak_0077363	-0.0985672	0.699651	0.505254	0.447769	0.505254
ACER2	peak_0077364	-0.323393	0.311632	0.505254	0.447769	0.505254
ACER2	peak_0077365	-0.778169	0.00990039	0.505254	0.447769	0.505254
ACER2	peak_0077366	0.273106	0.814507	0.505254	0.447769	0.505254
ACER3	peak_0014184	-0.069128	0.794814	0.087449	1	0.087449
ACER3	peak_0014185	-0.064665	0.943725	0.087449	1	0.087449
ACER3	peak_0014186	-0.131423	0.734497	0.087449	1	0.087449
ACHE	peak_0071798	-0.186023	0.73303	-0.115645	1	0.115645
ACHE	peak_0071799	0.0345277	0.961709	-0.115645	1	0.115645
ACIN1	peak_0022513	-0.145361	0.555362	0.147352	0.280504	0.147352
ACIN1	peak_0022514	-0.170968	0.594222	0.147352	0.280504	0.147352
ACIN1	peak_0022515	0.228971	0.734497	0.147352	0.280504	0.147352
ACIN1	peak_0022516	-0.162452	0.915788	0.147352	0.280504	0.147352
ACKR1	peak_0005133	0.24681	0.775531	0	1	0
ACKR2	peak_0052590	-0.0818868	0.890788	-0.136466	1	0.136466
ACKR2	peak_0052591	-0.0621031	0.8797	-0.136466	1	0.136466
ACKR3	peak_0045803	0.448011	0.00451911	2.17677	0.422493	2.17677
ACKR3	peak_0045804	0.281169	0.32777	2.17677	0.422493	2.17677
ACKR3	peak_0045805	-0.208118	0.797601	2.17677	0.422493	2.17677
ACKR3	peak_0045806	0.126808	0.927173	2.17677	0.422493	2.17677
ACKR3	peak_0045807	0.187793	0.573033	2.17677	0.422493	2.17677
ACKR3	peak_0045808	0.393939	0.0581412	2.17677	0.422493	2.17677
ACKR4	peak_0054831	0.0126493	0.990351	0.365442	0.392208	0.365442
ACKR4	peak_0054832	-0.771229	0.315078	0.365442	0.392208	0.365442
ACKR4	peak_0054833	-1.03996	0.136119	0.365442	0.392208	0.365442
ACKR4	peak_0054834	0.60176	0.611883	0.365442	0.392208	0.365442
ACLY	peak_0031974	-0.0924237	0.683772	-0.238818	0.16331	0.238818
ACO1	peak_0077560	0.0999398	0.902827	0.0505057	1	0.0505057
ACO1	peak_0077561	1.32944	0.26437	0.0505057	1	0.0505057
ACO1	peak_0077562	0.695954	0.281191	0.0505057	1	0.0505057
ACO1	peak_0077563	0.262295	0.28239	0.0505057	1	0.0505057
ACO1	peak_0077564	0.0885054	0.695313	0.0505057	1	0.0505057
ACO2	peak_0050716	-0.0639734	0.808062	-0.354291	0.00381653	0.354291
ACO2	peak_0050717	-0.834753	0.244388	-0.354291	0.00381653	0.354291
ACO2	peak_0050718	-0.396288	0.626187	-0.354291	0.00381653	0.354291
ACO2	peak_0050719	0.210738	0.806394	-0.354291	0.00381653	0.354291
ACOD1	peak_0021624	-0.0723351	0.969892	0	1	0
ACOT1	peak_0023880	-0.09323	0.921774	-0.388305	0.534157	0.388305
ACOT1	peak_0023881	0.0339169	0.964695	-0.388305	0.534157	0.388305
ACOT11	peak_0002680	0.979268	0.0134417	0.302697	1	0.302697
ACOT11	peak_0002681	0.281923	0.678006	0.302697	1	0.302697
ACOT11	peak_0002682	0.223186	0.145707	0.302697	1	0.302697
ACOT11	peak_0002683	0.159057	0.837175	0.302697	1	0.302697
ACOT11	peak_0002684	0.211431	0.894893	0.302697	1	0.302697
ACOT11	peak_0002685	0.242964	0.505728	0.302697	1	0.302697
ACOT12	peak_0061607	0.536915	0.538805	-0.0729011	1	0.0729011
ACOT12	peak_0061608	-0.420836	0.710389	-0.0729011	1	0.0729011
ACOT12	peak_0061609	-0.0223745	0.989735	-0.0729011	1	0.0729011
ACOT12	peak_0061610	0.301417	0.750245	-0.0729011	1	0.0729011
ACOT12	peak_0061611	0.0203282	0.97484	-0.0729011	1	0.0729011
ACOT2	peak_0023884	-0.216964	0.183969	-0.551402	0.089541	0.551402
ACOT4	peak_0023885	-1.0118	0.00279652	-0.467165	1	0.467165
ACOT4	peak_0023886	-0.316155	0.0806584	-0.467165	1	0.467165
ACOT6	peak_0023887	0.109413	0.67137	0.0680371	1	0.0680371
ACOT7	peak_0000281	0.0695126	0.926417	-0.287157	0.781509	0.287157
ACOT7	peak_0000282	0.143459	0.822268	-0.287157	0.781509	0.287157
ACOT7	peak_0000283	-0.0284598	0.941968	-0.287157	0.781509	0.287157
ACOT7	peak_0000284	0.124973	0.888701	-0.287157	0.781509	0.287157
ACOT7	peak_0000285	0.380642	0.682106	-0.287157	0.781509	0.287157
ACOT7	peak_0000286	0.953596	0.247283	-0.287157	0.781509	0.287157
ACOT7	peak_0000287	-0.0973827	0.731803	-0.287157	0.781509	0.287157
ACOT7	peak_0000288	-0.305244	0.592264	-0.287157	0.781509	0.287157
ACOT9	peak_0081124	-0.112911	0.927952	0.0565236	1	0.0565236
ACOT9	peak_0081125	-0.0877316	0.792492	0.0565236	1	0.0565236
ACOT9	peak_0081126	0.0638473	0.941381	0.0565236	1	0.0565236
ACOX2	peak_0053289	-0.752728	8.3681e-05	-0.115645	1	0.115645
ACOX3	peak_0056974	0.313547	0.574209	-0.0828726	1	0.0828726
ACOX3	peak_0056975	0.0385073	0.976042	-0.0828726	1	0.0828726
ACOX3	peak_0056976	0.0892618	0.893127	-0.0828726	1	0.0828726
ACOX3	peak_0056977	0.323676	0.130861	-0.0828726	1	0.0828726
ACOX3	peak_0056978	0.0911831	0.914757	-0.0828726	1	0.0828726
ACOX3	peak_0056979	0.148747	0.802745	-0.0828726	1	0.0828726
ACOX3	peak_0056980	0.280142	0.695066	-0.0828726	1	0.0828726
ACOX3	peak_0056981	-0.983077	0.0190466	-0.0828726	1	0.0828726
ACOX3	peak_0056982	-0.0651831	0.788889	-0.0828726	1	0.0828726
ACOX3	peak_0056983	-0.157523	0.599911	-0.0828726	1	0.0828726
ACOXL-AS1	peak_0042793	0.501848	0.197321	-1.30481	0.510442	1.30481
ACOXL-AS1	peak_0042794	0.0835258	0.955084	-1.30481	0.510442	1.30481
ACOXL-AS1	peak_0042795	0.295965	0.833361	-1.30481	0.510442	1.30481
ACOXL-AS1	peak_0042796	0.587122	0.598962	-1.30481	0.510442	1.30481
ACOXL-AS1	peak_0042797	0.0550427	0.966325	-1.30481	0.510442	1.30481
ACOXL-AS1	peak_0042798	0.252055	0.822356	-1.30481	0.510442	1.30481
ACOXL-AS1	peak_0042799	-0.195978	0.633828	-1.30481	0.510442	1.30481
ACOXL-AS1	peak_0042800	0.188806	0.845809	-1.30481	0.510442	1.30481
ACOXL-AS1	peak_0042801	-0.664867	0.0562268	-1.30481	0.510442	1.30481
ACOXL-AS1	peak_0042802	-0.51371	0.117712	-1.30481	0.510442	1.30481
ACOXL-AS1	peak_0042803	-0.986329	0.000370176	-1.30481	0.510442	1.30481
ACOXL-AS1	peak_0042804	-0.567575	0.0891967	-1.30481	0.510442	1.30481
ACOXL-AS1	peak_0042805	-1.25054	3.11381e-10	-1.30481	0.510442	1.30481
ACOXL-AS1	peak_0042806	-1.24422	5.83974e-09	-1.30481	0.510442	1.30481
ACOXL-AS1	peak_0042807	-0.301793	0.306532	-1.30481	0.510442	1.30481
ACOXL-AS1	peak_0042808	-0.436963	0.282305	-1.30481	0.510442	1.30481
ACOXL-AS1	peak_0042809	-0.409772	0.0159076	-1.30481	0.510442	1.30481
ACOXL-AS1	peak_0042810	-2.40629	4.4393e-09	-1.30481	0.510442	1.30481
ACOXL-AS1	peak_0042811	-0.0414699	0.895478	-1.30481	0.510442	1.30481
ACP1	peak_0039573	-0.137287	0.851164	-0.233821	0.254792	0.233821
ACP2	peak_0012853	-0.193389	0.324672	-0.135148	1	0.135148
ACP4	peak_0039179	-0.310447	0.281777	-0.280798	1	0.280798
ACP5	peak_0036978	-0.178549	0.662822	0.514658	1	0.514658
ACP5	peak_0036979	0.29723	0.145258	0.514658	1	0.514658
ACP5	peak_0036980	-0.107522	0.774451	0.514658	1	0.514658
ACP5	peak_0036981	-0.187476	0.472657	0.514658	1	0.514658
ACP5	peak_0036982	-0.0601743	0.91496	0.514658	1	0.514658
ACP6	peak_0004485	-0.36976	0.646271	0.549908	0.00175611	0.549908
ACP6	peak_0004486	-0.278937	0.60325	0.549908	0.00175611	0.549908
ACP6	peak_0004487	-0.354912	0.0857302	0.549908	0.00175611	0.549908
ACP6	peak_0004488	0.0823455	0.762988	0.549908	0.00175611	0.549908
ACP6	peak_0004489	0.268286	0.651604	0.549908	0.00175611	0.549908
ACP7	peak_0038267	0.135992	0.85135	0	1	0
ACP7	peak_0038268	0.460327	0.516542	0	1	0
ACRBP	peak_0015968	0.104806	0.795847	0.307957	1	0.307957
ACRBP	peak_0015969	0.248265	0.450551	0.307957	1	0.307957
ACSBG1	peak_0026635	0.14314	0.699445	-0.0910171	1	0.0910171
ACSBG1	peak_0026636	0.112454	0.799225	-0.0910171	1	0.0910171
ACSBG2	peak_0036571	0.433898	0.587751	-0.00713197	1	0.00713197
ACSBG2	peak_0036572	0.0905544	0.906231	-0.00713197	1	0.00713197
ACSBG2	peak_0036573	-0.0540697	0.831795	-0.00713197	1	0.00713197
ACSBG2	peak_0036574	0.27383	0.51761	-0.00713197	1	0.00713197
ACSF2	peak_0032493	0.121345	0.80479	0.987895	0.012584	0.987895
ACSF2	peak_0032494	-0.0153431	0.949038	0.987895	0.012584	0.987895
ACSF2	peak_0032495	-0.0631082	0.92834	0.987895	0.012584	0.987895
ACSF2	peak_0032496	0.344702	0.306729	0.987895	0.012584	0.987895
ACSF2	peak_0032497	0.620531	0.0782389	0.987895	0.012584	0.987895
ACSF3	peak_0030212	-0.0352859	0.963673	0.241212	0.219911	0.241212
ACSF3	peak_0030213	0.371025	0.328968	0.241212	0.219911	0.241212
ACSF3	peak_0030214	-0.0354452	0.982659	0.241212	0.219911	0.241212
ACSF3	peak_0030215	0.553827	0.45546	0.241212	0.219911	0.241212
ACSF3	peak_0030216	-0.598923	0.00171145	0.241212	0.219911	0.241212
ACSF3	peak_0030217	-0.338553	0.108575	0.241212	0.219911	0.241212
ACSF3	peak_0030218	-0.5567	0.174816	0.241212	0.219911	0.241212
ACSF3	peak_0030219	-0.106628	0.673124	0.241212	0.219911	0.241212
ACSF3	peak_0030220	0.267179	0.482003	0.241212	0.219911	0.241212
ACSF3	peak_0030221	0.0900923	0.756841	0.241212	0.219911	0.241212
ACSF3	peak_0030222	0.357413	0.116652	0.241212	0.219911	0.241212
ACSF3	peak_0030223	-0.281946	0.728616	0.241212	0.219911	0.241212
ACSF3	peak_0030224	-0.38389	0.46645	0.241212	0.219911	0.241212
ACSF3	peak_0030225	-0.38142	0.738187	0.241212	0.219911	0.241212
ACSF3	peak_0030226	0.723054	0.00545758	0.241212	0.219911	0.241212
ACSF3	peak_0030227	0.318177	0.0937591	0.241212	0.219911	0.241212
ACSF3	peak_0030228	0.341696	0.109811	0.241212	0.219911	0.241212
ACSF3	peak_0030229	-0.54496	0.0805647	0.241212	0.219911	0.241212
ACSL1	peak_0060048	0.539496	0.0144251	-0.553354	0.0373006	0.553354
ACSL1	peak_0060049	-0.228698	0.316234	-0.553354	0.0373006	0.553354
ACSL1	peak_0060050	-0.140608	0.799658	-0.553354	0.0373006	0.553354
ACSL1	peak_0060051	0.0994869	0.797185	-0.553354	0.0373006	0.553354
ACSL1	peak_0060052	-0.0992754	0.598605	-0.553354	0.0373006	0.553354
ACSL3	peak_0045270	0.109327	0.754701	-0.0632213	1	0.0632213
ACSL3	peak_0045271	-0.0166245	0.962383	-0.0632213	1	0.0632213
ACSL3	peak_0045272	-0.230009	0.685893	-0.0632213	1	0.0632213
ACSL3	peak_0045273	-0.300601	0.340239	-0.0632213	1	0.0632213
ACSL3	peak_0045274	-0.0688163	0.900922	-0.0632213	1	0.0632213
ACSL4	peak_0082275	0.0158191	0.961979	-0.538911	0.0165668	0.538911
ACSL4	peak_0082276	-0.653141	0.021709	-0.538911	0.0165668	0.538911
ACSL5	peak_0011146	0.39828	0.126203	-0.109431	0.78387	0.109431
ACSL5	peak_0011147	3.69169e-05	0.999891	-0.109431	0.78387	0.109431
ACSL5	peak_0011148	-0.298595	0.597215	-0.109431	0.78387	0.109431
ACSL6	peak_0062548	0.027385	0.972188	-2.22375	1	2.22375
ACSL6	peak_0062549	-0.0652328	0.901102	-2.22375	1	2.22375
ACSL6	peak_0062550	-0.711287	0.0917464	-2.22375	1	2.22375
ACSM1	peak_0028191	-0.085222	0.781633	1.06694	0.000769043	1.06694
ACSM1	peak_0028192	-0.712818	0.225877	1.06694	0.000769043	1.06694
ACSM2B	peak_0028189	-0.0111712	0.988304	0.245026	1	0.245026
ACSM2B	peak_0028190	1.05289	0.25512	0.245026	1	0.245026
ACSM3	peak_0028194	-0.179934	0.573068	1.00006	0.00788385	1.00006
ACSM3	peak_0028195	0.267632	0.546911	1.00006	0.00788385	1.00006
ACSM5	peak_0028188	-0.11108	0.776008	1.23358	0.635025	1.23358
ACSM6	peak_0010498	0.254111	0.64613	-0.839142	0.714049	0.839142
ACSM6	peak_0010499	-0.187255	0.316775	-0.839142	0.714049	0.839142
ACSM6	peak_0010500	-0.263957	0.361029	-0.839142	0.714049	0.839142
ACSM6	peak_0010501	-0.526791	0.0211345	-0.839142	0.714049	0.839142
ACSS1	peak_0046653	0.668666	0.209452	0.480588	0.000239927	0.480588
ACSS1	peak_0046654	0.285653	0.203875	0.480588	0.000239927	0.480588
ACSS1	peak_0046655	0.0472278	0.841924	0.480588	0.000239927	0.480588
ACSS1	peak_0046656	0.0877815	0.821239	0.480588	0.000239927	0.480588
ACSS2	peak_0046960	0.0652686	0.763039	0.580935	0.0774186	0.580935
ACSS2	peak_0046961	0.27281	0.776456	0.580935	0.0774186	0.580935
ACSS3	peak_0018382	0.703334	0.478071	0	1	0
ACTA1	peak_0007337	0.246811	0.59769	-0.880683	0.694485	0.880683
ACTA1	peak_0007338	-0.298057	0.773048	-0.880683	0.694485	0.880683
ACTA1	peak_0007339	-1.85153	0.00897543	-0.880683	0.694485	0.880683
ACTA2	peak_0010303	0.0222282	0.96785	0.0814471	1	0.0814471
ACTA2	peak_0010304	0.884724	0.310876	0.0814471	1	0.0814471
ACTA2-AS1	peak_0010301	-0.307521	0.381812	0.19257	1	0.19257
ACTA2-AS1	peak_0010302	-0.0406889	0.926754	0.19257	1	0.19257
ACTB	peak_0069518	-0.0199844	0.944949	-0.813305	0.000820276	0.813305
ACTB	peak_0069519	-0.0483307	0.898573	-0.813305	0.000820276	0.813305
ACTB	peak_0069520	-0.0081872	0.983452	-0.813305	0.000820276	0.813305
ACTB	peak_0069521	-0.27499	0.419368	-0.813305	0.000820276	0.813305
ACTB	peak_0069522	0.12948	0.791913	-0.813305	0.000820276	0.813305
ACTB	peak_0069523	0.155356	0.693977	-0.813305	0.000820276	0.813305
ACTB	peak_0069524	0.107631	0.570719	-0.813305	0.000820276	0.813305
ACTB	peak_0069525	0.0241369	0.921213	-0.813305	0.000820276	0.813305
ACTC1	peak_0025130	-0.636358	0.41396	0.245026	1	0.245026
ACTG1	peak_0033888	0.0679757	0.760137	-1.06234	0.0052361	1.06234
ACTG1	peak_0033889	-0.281299	0.229458	-1.06234	0.0052361	1.06234
ACTG1	peak_0033890	-0.914469	0.0269246	-1.06234	0.0052361	1.06234
ACTG1	peak_0033891	0.830456	0.299437	-1.06234	0.0052361	1.06234
ACTG1	peak_0033892	-0.163803	0.275259	-1.06234	0.0052361	1.06234
ACTG1	peak_0033893	-0.0819913	0.719966	-1.06234	0.0052361	1.06234
ACTG1	peak_0033894	0.0215701	0.952925	-1.06234	0.0052361	1.06234
ACTG1	peak_0033895	0.11865	0.535876	-1.06234	0.0052361	1.06234
ACTG2	peak_0041805	0.0976862	0.930945	0	1	0
ACTG2	peak_0041806	-1.68917	0.007297	0	1	0
ACTG2	peak_0041807	-0.100327	0.824388	0	1	0
ACTL10	peak_0046882	-0.081134	0.743029	-0.00661981	1	0.00661981
ACTL6A	peak_0055771	-0.0629588	0.851539	-0.344227	0.038224	0.344227
ACTL7A	peak_0079093	-1.20558	2.02809e-05	-0.458672	1	0.458672
ACTL7B	peak_0079085	-0.582139	0.0652575	-0.115644	1	0.115644
ACTL7B	peak_0079086	-0.711268	0.0448581	-0.115644	1	0.115644
ACTL7B	peak_0079087	-0.358525	0.272088	-0.115644	1	0.115644
ACTL7B	peak_0079088	0.714458	0.414366	-0.115644	1	0.115644
ACTL7B	peak_0079089	-0.0877369	0.9434	-0.115644	1	0.115644
ACTL7B	peak_0079090	-0.0336283	0.96293	-0.115644	1	0.115644
ACTL7B	peak_0079091	0.0709733	0.929971	-0.115644	1	0.115644
ACTL7B	peak_0079092	-0.0604542	0.939444	-0.115644	1	0.115644
ACTL9	peak_0036779	0.370915	0.583846	0	1	0
ACTL9	peak_0036780	0.271824	0.757883	0	1	0
ACTL9	peak_0036781	0.138789	0.903472	0	1	0
ACTN1	peak_0023661	-0.527299	0.558906	-3.99533	0.0313429	3.99533
ACTN1	peak_0023662	0.0314125	0.970868	-3.99533	0.0313429	3.99533
ACTN1	peak_0023663	0.894949	0.311274	-3.99533	0.0313429	3.99533
ACTN1	peak_0023664	-0.0140099	0.993063	-3.99533	0.0313429	3.99533
ACTN1	peak_0023665	-0.0888694	0.898827	-3.99533	0.0313429	3.99533
ACTN1	peak_0023666	-0.0627961	0.902606	-3.99533	0.0313429	3.99533
ACTN2	peak_0007638	1.56767	0.0367499	0	1	0
ACTN4	peak_0038226	0.00474354	0.995013	0.523139	0.286234	0.523139
ACTN4	peak_0038227	0.0268109	0.945208	0.523139	0.286234	0.523139
ACTN4	peak_0038228	-0.124398	0.526912	0.523139	0.286234	0.523139
ACTN4	peak_0038229	-0.478368	0.543804	0.523139	0.286234	0.523139
ACTN4	peak_0038230	-0.720344	0.320079	0.523139	0.286234	0.523139
ACTN4	peak_0038231	-0.0807849	0.920968	0.523139	0.286234	0.523139
ACTN4	peak_0038232	-0.400562	0.6019	0.523139	0.286234	0.523139
ACTN4	peak_0038233	0.499321	0.294147	0.523139	0.286234	0.523139
ACTN4	peak_0038234	0.585489	0.295259	0.523139	0.286234	0.523139
ACTN4	peak_0038235	0.0593876	0.940678	0.523139	0.286234	0.523139
ACTN4	peak_0038236	-0.0242417	0.974584	0.523139	0.286234	0.523139
ACTR10	peak_0023209	-0.0637861	0.828554	0.0304239	1	0.0304239
ACTR1A	peak_0010873	-0.0219929	0.957639	-0.120191	0.568603	0.120191
ACTR1B	peak_0042360	-0.101099	0.703446	-0.0928705	1	0.0928705
ACTR2	peak_0041542	0.0183691	0.972796	-0.303407	0.641001	0.303407
ACTR2	peak_0041543	0.859173	0.0366344	-0.303407	0.641001	0.303407
ACTR2	peak_0041544	-0.208439	0.380893	-0.303407	0.641001	0.303407
ACTR3	peak_0042943	-0.409815	0.533244	-0.671456	0.00176019	0.671456
ACTR3	peak_0042944	0.146543	0.596155	-0.671456	0.00176019	0.671456
ACTR3	peak_0042945	-0.237561	0.29201	-0.671456	0.00176019	0.671456
ACTR3	peak_0042946	0.659289	0.0182889	-0.671456	0.00176019	0.671456
ACTR3	peak_0042947	0.353054	0.259352	-0.671456	0.00176019	0.671456
ACTR3	peak_0042948	0.674645	0.0849327	-0.671456	0.00176019	0.671456
ACTR3	peak_0042949	-0.232536	0.592268	-0.671456	0.00176019	0.671456
ACTR3	peak_0042950	-0.167842	0.340553	-0.671456	0.00176019	0.671456
ACTR3-AS1	peak_0042951	-0.0760729	0.927077	0.347443	0.702049	0.347443
ACTR3-AS1	peak_0042952	-0.595315	0.00799115	0.347443	0.702049	0.347443
ACTR3-AS1	peak_0042953	0.102696	0.783998	0.347443	0.702049	0.347443
ACTR3B	peak_0073212	0.506114	0.585755	-0.0953107	1	0.0953107
ACTR3B	peak_0073213	-0.0470029	0.852059	-0.0953107	1	0.0953107
ACTR3B	peak_0073214	-0.0397971	0.982659	-0.0953107	1	0.0953107
ACTR3B	peak_0073215	0.510264	0.651083	-0.0953107	1	0.0953107
ACTR3B	peak_0073216	-0.503319	0.611932	-0.0953107	1	0.0953107
ACTR3B	peak_0073217	0.591831	0.414502	-0.0953107	1	0.0953107
ACTR3B	peak_0073218	0.630711	0.446631	-0.0953107	1	0.0953107
ACTR3C	peak_0073076	0.155269	0.890569	0.429837	0.126338	0.429837
ACTR3C	peak_0073077	0.111258	0.920816	0.429837	0.126338	0.429837
ACTR3C	peak_0073078	-0.0191139	0.986507	0.429837	0.126338	0.429837
ACTR3C	peak_0073079	0.681324	0.60391	0.429837	0.126338	0.429837
ACTR5	peak_0047175	-0.0522236	0.849865	0.139961	0.953717	0.139961
ACTR5	peak_0047176	-0.504731	0.611047	0.139961	0.953717	0.139961
ACTR5	peak_0047177	0.353416	0.881942	0.139961	0.953717	0.139961
ACTR6	peak_0018883	0.0201595	0.946678	0.14274	0.783029	0.14274
ACTR8	peak_0053148	-0.475905	0.313909	-0.0415847	1	0.0415847
ACTR8	peak_0053149	-0.150647	0.446739	-0.0415847	1	0.0415847
ACTRT3	peak_0055517	-0.248878	0.202623	-0.727408	0.912442	0.727408
ACVR1	peak_0043755	0.49462	0.517846	0.354858	0.684429	0.354858
ACVR1	peak_0043756	0.243404	0.769506	0.354858	0.684429	0.354858
ACVR1	peak_0043757	0.025123	0.99138	0.354858	0.684429	0.354858
ACVR1	peak_0043758	0.0491951	0.840183	0.354858	0.684429	0.354858
ACVR1	peak_0043759	0.43552	0.0940685	0.354858	0.684429	0.354858
ACVR1	peak_0043760	-0.445054	0.228534	0.354858	0.684429	0.354858
ACVR1	peak_0043761	0.191742	0.809458	0.354858	0.684429	0.354858
ACVR1B	peak_0017523	-0.0442434	0.847526	-0.353363	0.256843	0.353363
ACVR1B	peak_0017524	-0.0416695	0.923886	-0.353363	0.256843	0.353363
ACVR1B	peak_0017525	0.0654405	0.936279	-0.353363	0.256843	0.353363
ACVR1C	peak_0043751	-0.395051	0.388927	-0.107085	1	0.107085
ACVR1C	peak_0043752	0.368002	0.580859	-0.107085	1	0.107085
ACVR1C	peak_0043753	0.622615	0.544829	-0.107085	1	0.107085
ACVR1C	peak_0043754	-0.215399	0.467453	-0.107085	1	0.107085
ACVR2A	peak_0043571	-0.147554	0.883735	0.162373	1	0.162373
ACVR2A	peak_0043572	0.778878	0.172446	0.162373	1	0.162373
ACVR2A	peak_0043573	-0.127184	0.944015	0.162373	1	0.162373
ACVR2A	peak_0043574	-0.280134	0.816095	0.162373	1	0.162373
ACVR2A	peak_0043575	-0.179807	0.887026	0.162373	1	0.162373
ACVR2A	peak_0043576	0.194472	0.899337	0.162373	1	0.162373
ACVR2A	peak_0043577	0.1625	0.872797	0.162373	1	0.162373
ACVR2A	peak_0043578	-0.0923986	0.80479	0.162373	1	0.162373
ACVR2A	peak_0043579	-0.169907	0.818414	0.162373	1	0.162373
ACVR2B	peak_0052421	0.942023	0.365187	0.77732	0.477078	0.77732
ACVR2B	peak_0052422	0.0816177	0.768799	0.77732	0.477078	0.77732
ACVR2B-AS1	peak_0052423	0.22885	0.725917	-0.40454	1	0.40454
ACVRL1	peak_0017521	-0.0204482	0.970552	0	1	0
ACVRL1	peak_0017522	0.169597	0.709685	0	1	0
ACY1	peak_0053019	-0.318276	0.136865	-1.15619	0.0944016	1.15619
ACY3	peak_0013725	0.220699	0.372703	0.0265004	1	0.0265004
ACY3	peak_0013726	-0.016538	0.956231	0.0265004	1	0.0265004
ACY3	peak_0013727	-0.258423	0.231245	0.0265004	1	0.0265004
ACY3	peak_0013728	0.146945	0.60972	0.0265004	1	0.0265004
ACYP1	peak_0023965	-0.0560735	0.847842	0.576203	0.155073	0.576203
ACYP1	peak_0023966	-0.227276	0.256812	0.576203	0.155073	0.576203
ACYP2	peak_0041101	0.0775505	0.924044	0.306283	0.810794	0.306283
ACYP2	peak_0041102	0.227196	0.904953	0.306283	0.810794	0.306283
ACYP2	peak_0041103	0.181693	0.900589	0.306283	0.810794	0.306283
ACYP2	peak_0041104	-0.136334	0.895555	0.306283	0.810794	0.306283
ACYP2	peak_0041105	-0.746371	0.00824222	0.306283	0.810794	0.306283
ACYP2	peak_0041106	0.397449	0.0874264	0.306283	0.810794	0.306283
ACYP2	peak_0041107	0.363336	0.0881198	0.306283	0.810794	0.306283
ACYP2	peak_0041108	0.479857	0.0172419	0.306283	0.810794	0.306283
ACYP2	peak_0041109	0.737914	3.19173e-05	0.306283	0.810794	0.306283
ACYP2	peak_0041110	0.136066	0.761109	0.306283	0.810794	0.306283
ACYP2	peak_0041111	-0.065794	0.854116	0.306283	0.810794	0.306283
ACYP2	peak_0041112	-0.160319	0.931554	0.306283	0.810794	0.306283
ADA	peak_0047350	0.0724131	0.921428	0.555536	1	0.555536
ADA	peak_0047351	0.604273	0.0744256	0.555536	1	0.555536
ADA	peak_0047352	0.169026	0.622304	0.555536	1	0.555536
ADA	peak_0047353	0.151014	0.792542	0.555536	1	0.555536
ADA	peak_0047354	0.179487	0.428058	0.555536	1	0.555536
ADA	peak_0047355	0.601198	0.31122	0.555536	1	0.555536
ADA	peak_0047356	0.147421	0.420493	0.555536	1	0.555536
ADA2	peak_0049419	0.250956	0.730838	1.44356	0.000145897	1.44356
ADA2	peak_0049420	0.246552	0.545414	1.44356	0.000145897	1.44356
ADA2	peak_0049421	-0.0987481	0.838275	1.44356	0.000145897	1.44356
ADA2	peak_0049422	0.0423785	0.903302	1.44356	0.000145897	1.44356
ADA2	peak_0049423	0.448811	0.396257	1.44356	0.000145897	1.44356
ADA2	peak_0049424	-0.0717395	0.859154	1.44356	0.000145897	1.44356
ADA2	peak_0049425	0.0241599	0.957628	1.44356	0.000145897	1.44356
ADAL	peak_0025392	-0.0279716	0.91769	-0.496758	0.127332	0.496758
ADAM10	peak_0025764	-0.448577	0.184274	0.350358	0.105607	0.350358
ADAM10	peak_0025765	-0.229712	0.534012	0.350358	0.105607	0.350358
ADAM10	peak_0025766	0.460418	0.634262	0.350358	0.105607	0.350358
ADAM10	peak_0025767	-0.105075	0.596804	0.350358	0.105607	0.350358
ADAM11	peak_0032199	0.22207	0.630202	1.17878	0.0222471	1.17878
ADAM11	peak_0032200	0.146602	0.897161	1.17878	0.0222471	1.17878
ADAM11	peak_0032201	0.044223	0.860177	1.17878	0.0222471	1.17878
ADAM11	peak_0032202	-0.214134	0.532176	1.17878	0.0222471	1.17878
ADAM12	peak_0011531	0.209401	0.880307	1.14464	0.935922	1.14464
ADAM15	peak_0004824	-0.0568536	0.727269	-0.515467	0.471381	0.515467
ADAM17	peak_0039703	-0.101158	0.797783	-0.229876	0.514042	0.229876
ADAM17	peak_0039704	0.0463926	0.936645	-0.229876	0.514042	0.229876
ADAM17	peak_0039705	-0.072926	0.849507	-0.229876	0.514042	0.229876
ADAM17	peak_0039706	0.404499	0.0940187	-0.229876	0.514042	0.229876
ADAM17	peak_0039707	-1.32004	0.000117724	-0.229876	0.514042	0.229876
ADAM17	peak_0039708	-0.142197	0.563416	-0.229876	0.514042	0.229876
ADAM19	peak_0063442	-0.310524	0.596321	0.919125	0.019113	0.919125
ADAM19	peak_0063443	-0.273166	0.21938	0.919125	0.019113	0.919125
ADAM19	peak_0063444	0.401019	0.332222	0.919125	0.019113	0.919125
ADAM19	peak_0063445	0.635264	0.292875	0.919125	0.019113	0.919125
ADAM19	peak_0063446	-0.249249	0.839197	0.919125	0.019113	0.919125
ADAM19	peak_0063447	0.299368	0.721591	0.919125	0.019113	0.919125
ADAM19	peak_0063448	-0.927838	0.117376	0.919125	0.019113	0.919125
ADAM19	peak_0063449	-0.37738	0.381547	0.919125	0.019113	0.919125
ADAM19	peak_0063450	0.060291	0.876699	0.919125	0.019113	0.919125
ADAM19	peak_0063451	0.0349948	0.883957	0.919125	0.019113	0.919125
ADAM19	peak_0063452	-1.02919	0.0017261	0.919125	0.019113	0.919125
ADAM19	peak_0063453	0.281984	0.499011	0.919125	0.019113	0.919125
ADAM19	peak_0063454	0.434115	0.0623346	0.919125	0.019113	0.919125
ADAM19	peak_0063455	0.0392769	0.928517	0.919125	0.019113	0.919125
ADAM19	peak_0063456	-0.445976	0.0910372	0.919125	0.019113	0.919125
ADAM19	peak_0063457	-0.208218	0.502939	0.919125	0.019113	0.919125
ADAM19	peak_0063458	-0.0963178	0.888478	0.919125	0.019113	0.919125
ADAM19	peak_0063459	-0.494658	0.366516	0.919125	0.019113	0.919125
ADAM19	peak_0063460	0.128005	0.84482	0.919125	0.019113	0.919125
ADAM20	peak_0023733	0.40613	0.790414	1.5194	0.779453	1.5194
ADAM21P1	peak_0023725	-0.323054	0.771236	-1.08061	1	1.08061
ADAM21P1	peak_0023726	0.311668	0.539647	-1.08061	1	1.08061
ADAM21P1	peak_0023727	0.175089	0.832044	-1.08061	1	1.08061
ADAM21P1	peak_0023728	-0.559794	0.55854	-1.08061	1	1.08061
ADAM22	peak_0071370	-0.167449	0.459589	0.713717	0.78801	0.713717
ADAM22	peak_0071371	0.126796	0.925036	0.713717	0.78801	0.713717
ADAM23	peak_0044953	0.002975	0.998263	0	1	0
ADAM28	peak_0074051	0.0442073	0.967178	0.464753	0.673367	0.464753
ADAM28	peak_0074052	-0.167214	0.882955	0.464753	0.673367	0.464753
ADAM28	peak_0074053	0.266241	0.760304	0.464753	0.673367	0.464753
ADAM28	peak_0074054	0.115346	0.841819	0.464753	0.673367	0.464753
ADAM28	peak_0074055	-0.185191	0.657595	0.464753	0.673367	0.464753
ADAM28	peak_0074056	0.572573	0.0362497	0.464753	0.673367	0.464753
ADAM28	peak_0074057	0.036713	0.936351	0.464753	0.673367	0.464753
ADAM28	peak_0074058	0.252059	0.68919	0.464753	0.673367	0.464753
ADAM28	peak_0074059	-0.403161	0.650424	0.464753	0.673367	0.464753
ADAM28	peak_0074060	-0.176983	0.590716	0.464753	0.673367	0.464753
ADAM28	peak_0074061	0.43451	0.282431	0.464753	0.673367	0.464753
ADAM28	peak_0074062	-0.391976	0.284873	0.464753	0.673367	0.464753
ADAM28	peak_0074063	-0.744886	0.0382434	0.464753	0.673367	0.464753
ADAM28	peak_0074064	0.0780478	0.938349	0.464753	0.673367	0.464753
ADAM28	peak_0074065	-0.951627	3.12657e-05	0.464753	0.673367	0.464753
ADAM28	peak_0074066	-0.0201594	0.978138	0.464753	0.673367	0.464753
ADAM28	peak_0074067	0.677859	0.598353	0.464753	0.673367	0.464753
ADAM28	peak_0074068	0.0346144	0.94157	0.464753	0.673367	0.464753
ADAM29	peak_0059841	0.361078	0.759862	1.30729	1	1.30729
ADAM29	peak_0059842	-0.291713	0.66789	1.30729	1	1.30729
ADAM29	peak_0059843	0.916931	0.0375025	1.30729	1	1.30729
ADAM29	peak_0059844	0.00947802	0.99201	1.30729	1	1.30729
ADAM29	peak_0059845	0.137513	0.867678	1.30729	1	1.30729
ADAM29	peak_0059846	0.270605	0.32723	1.30729	1	1.30729
ADAM29	peak_0059847	0.10419	0.889004	1.30729	1	1.30729
ADAM29	peak_0059848	-0.371238	0.600982	1.30729	1	1.30729
ADAM29	peak_0059849	-0.309316	0.561399	1.30729	1	1.30729
ADAM29	peak_0059850	0.374385	0.13494	1.30729	1	1.30729
ADAM29	peak_0059851	0.66221	0.320706	1.30729	1	1.30729
ADAM29	peak_0059852	0.836568	0.339042	1.30729	1	1.30729
ADAM29	peak_0059853	0.186531	0.772247	1.30729	1	1.30729
ADAM29	peak_0059854	0.413807	0.432205	1.30729	1	1.30729
ADAM29	peak_0059855	-0.0790587	0.958328	1.30729	1	1.30729
ADAM29	peak_0059856	0.0542583	0.974512	1.30729	1	1.30729
ADAM29	peak_0059857	0.144857	0.879639	1.30729	1	1.30729
ADAM29	peak_0059858	0.159958	0.81797	1.30729	1	1.30729
ADAM29	peak_0059859	0.324321	0.726334	1.30729	1	1.30729
ADAM29	peak_0059860	-0.461899	0.807673	1.30729	1	1.30729
ADAM29	peak_0059861	-0.148328	0.884417	1.30729	1	1.30729
ADAM29	peak_0059862	0.956197	0.352566	1.30729	1	1.30729
ADAM29	peak_0059863	0.574873	0.398225	1.30729	1	1.30729
ADAM29	peak_0059864	-0.609862	0.383495	1.30729	1	1.30729
ADAM29	peak_0059865	0.257923	0.790367	1.30729	1	1.30729
ADAM33	peak_0046181	0.243279	0.545761	-2.59743	1	2.59743
ADAM33	peak_0046182	1.38149	0.0795156	-2.59743	1	2.59743
ADAM7	peak_0074076	0.113054	0.695111	0	1	0
ADAM7	peak_0074077	-0.00630972	0.993815	0	1	0
ADAM8	peak_0011688	0.74271	0.0545668	0.495576	0.922123	0.495576
ADAM8	peak_0011689	-0.298681	0.098585	0.495576	0.922123	0.495576
ADAM8	peak_0011690	0.0201429	0.959982	0.495576	0.922123	0.495576
ADAM8	peak_0011691	0.343616	0.148748	0.495576	0.922123	0.495576
ADAM9	peak_0074537	-0.171019	0.660226	-0.136932	1	0.136932
ADAMDEC1	peak_0074069	0.127099	0.592146	0.00978799	1	0.00978799
ADAMDEC1	peak_0074070	-0.650798	0.192316	0.00978799	1	0.00978799
ADAMDEC1	peak_0074071	-0.231299	0.413441	0.00978799	1	0.00978799
ADAMDEC1	peak_0074072	-0.184225	0.510094	0.00978799	1	0.00978799
ADAMDEC1	peak_0074073	0.232809	0.565729	0.00978799	1	0.00978799
ADAMDEC1	peak_0074074	-0.351936	0.0286196	0.00978799	1	0.00978799
ADAMDEC1	peak_0074075	0.202635	0.865113	0.00978799	1	0.00978799
ADAMTS1	peak_0048628	1.26568	0.101399	-1.84504	1	1.84504
ADAMTS10	peak_0036777	0.181637	0.825687	0.305708	1	0.305708
ADAMTS10	peak_0036778	0.0967906	0.924849	0.305708	1	0.305708
ADAMTS12	peak_0060577	0.0297444	0.98555	0.245026	1	0.245026
ADAMTS13	peak_0080216	0.022264	0.956338	-0.836985	1	0.836985
ADAMTS13	peak_0080218	-0.392016	0.350845	-0.836985	1	0.836985
ADAMTS13	peak_0080219	0.240402	0.368131	-0.836985	1	0.836985
ADAMTS13	peak_0080220	-0.0125063	0.992724	-0.836985	1	0.836985
ADAMTS13	peak_0080221	0.314836	0.616139	-0.836985	1	0.836985
ADAMTS13	peak_0080222	0.197971	0.592245	-0.836985	1	0.836985
ADAMTS14	peak_0009727	-0.213166	0.748087	1.03734	1	1.03734
ADAMTS14	peak_0009728	0.144528	0.868767	1.03734	1	1.03734
ADAMTS14	peak_0009729	-0.463309	0.0245097	1.03734	1	1.03734
ADAMTS14	peak_0009730	0.238382	0.834952	1.03734	1	1.03734
ADAMTS15	peak_0015609	0.0987845	0.928517	0.605697	1	0.605697
ADAMTS15	peak_0015610	0.664681	0.379471	0.605697	1	0.605697
ADAMTS17	peak_0027293	-0.309061	0.782626	-2.10411	0.661827	2.10411
ADAMTS17	peak_0027294	0.0690055	0.940443	-2.10411	0.661827	2.10411
ADAMTS17	peak_0027295	0.310074	0.689522	-2.10411	0.661827	2.10411
ADAMTS17	peak_0027296	0.270889	0.737634	-2.10411	0.661827	2.10411
ADAMTS17	peak_0027297	-0.0241586	0.986726	-2.10411	0.661827	2.10411
ADAMTS17	peak_0027298	0.697773	0.650487	-2.10411	0.661827	2.10411
ADAMTS17	peak_0027299	-0.0491426	0.974396	-2.10411	0.661827	2.10411
ADAMTS17	peak_0027300	0.148721	0.855907	-2.10411	0.661827	2.10411
ADAMTS17	peak_0027301	0.339444	0.770441	-2.10411	0.661827	2.10411
ADAMTS19-AS1	peak_0062480	0.939303	0.337595	0.605697	1	0.605697
ADAMTS2	peak_0064023	0.55239	0.493039	-1.05611	1	1.05611
ADAMTS20	peak_0017042	0.625507	0.39702	0	1	0
ADAMTS4	peak_0005278	-0.10081	0.782674	1.22641	0.126914	1.22641
ADAMTS4	peak_0005279	0.0280283	0.957941	1.22641	0.126914	1.22641
ADAMTS5	peak_0048629	-0.472327	0.726464	0.245026	1	0.245026
ADAMTS6	peak_0061176	0.0993482	0.949135	0.295614	1	0.295614
ADAMTS6	peak_0061177	-0.153253	0.870919	0.295614	1	0.295614
ADAMTS6	peak_0061178	0.268011	0.838775	0.295614	1	0.295614
ADAMTS6	peak_0061179	1.13841	0.462005	0.295614	1	0.295614
ADAMTS6	peak_0061180	0.7246	0.32777	0.295614	1	0.295614
ADAMTS6	peak_0061181	0.104797	0.727275	0.295614	1	0.295614
ADAMTS6	peak_0061182	-0.28494	0.126685	0.295614	1	0.295614
ADAMTS6	peak_0061183	0.110941	0.885726	0.295614	1	0.295614
ADAMTS6	peak_0061184	-0.023276	0.963907	0.295614	1	0.295614
ADAMTS7	peak_0026660	-0.0610636	0.877716	-0.726855	1	0.726855
ADAMTS7	peak_0026661	0.300209	0.432209	-0.726855	1	0.726855
ADAMTS7	peak_0026662	-0.0480594	0.868958	-0.726855	1	0.726855
ADAMTS7P1	peak_0026776	0.0209146	0.989881	0.175798	1	0.175798
ADAMTS7P1	peak_0026777	-0.145583	0.679339	0.175798	1	0.175798
ADAMTS8	peak_0015606	0.303718	0.803339	0.12247	1	0.12247
ADAMTS8	peak_0015607	0.117343	0.839012	0.12247	1	0.12247
ADAMTS8	peak_0015608	-0.122757	0.69596	0.12247	1	0.12247
ADAMTS9	peak_0053385	0.44178	0.714872	0	1	0
ADAMTSL4	peak_0004589	-0.25707	0.623027	-0.699939	0.182578	0.699939
ADAMTSL4	peak_0004590	-0.183296	0.420826	-0.699939	0.182578	0.699939
ADAMTSL4-AS1	peak_0004593	-0.299434	0.268251	-0.382845	1	0.382845
ADAMTSL4-AS1	peak_0004594	0.176498	0.583846	-0.382845	1	0.382845
ADAMTSL4-AS1	peak_0004595	-0.299421	0.131428	-0.382845	1	0.382845
ADAMTSL5	peak_0036115	0.174173	0.802763	0.133847	1	0.133847
ADAMTSL5	peak_0036116	-0.110131	0.827052	0.133847	1	0.133847
ADAMTSL5	peak_0036117	-0.310023	0.366068	0.133847	1	0.133847
ADAMTSL5	peak_0036118	0.440926	0.352379	0.133847	1	0.133847
ADAP1	peak_0069236	-0.03573	0.96716	-0.373765	1	0.373765
ADAP1	peak_0069237	-0.464555	0.519984	-0.373765	1	0.373765
ADAP1	peak_0069238	-0.480722	0.31232	-0.373765	1	0.373765
ADAP1	peak_0069239	-0.155333	0.402961	-0.373765	1	0.373765
ADAP1	peak_0069240	-0.114787	0.683732	-0.373765	1	0.373765
ADAP1	peak_0069241	-0.430305	0.141011	-0.373765	1	0.373765
ADAP1	peak_0069242	-0.263537	0.272524	-0.373765	1	0.373765
ADAP1	peak_0069243	-1.74137	7.03832e-05	-0.373765	1	0.373765
ADAP1	peak_0069244	-0.198205	0.709887	-0.373765	1	0.373765
ADAP1	peak_0069245	-0.0830053	0.824373	-0.373765	1	0.373765
ADAP1	peak_0069246	-0.059851	0.849647	-0.373765	1	0.373765
ADAP1	peak_0069247	-0.540364	0.291001	-0.373765	1	0.373765
ADAP1	peak_0069248	0.0841695	0.849379	-0.373765	1	0.373765
ADAP2	peak_0031570	-0.244903	0.174095	-1.04557	0.28516	1.04557
ADAP2	peak_0031571	-0.0345245	0.953237	-1.04557	0.28516	1.04557
ADAR	peak_0004786	-0.0666335	0.780648	-0.0857702	1	0.0857702
ADAR	peak_0004787	0.591769	0.179498	-0.0857702	1	0.0857702
ADAR	peak_0004788	-0.618795	4.90872e-05	-0.0857702	1	0.0857702
ADAR	peak_0004789	-0.132485	0.726531	-0.0857702	1	0.0857702
ADAR	peak_0004790	0.0519504	0.97433	-0.0857702	1	0.0857702
ADAR	peak_0004791	0.0554096	0.958134	-0.0857702	1	0.0857702
ADARB1	peak_0049249	-0.000666662	0.998774	-1.03979	0.598766	1.03979
ADARB1	peak_0049250	-0.353848	0.736432	-1.03979	0.598766	1.03979
ADARB1	peak_0049251	-0.137385	0.760552	-1.03979	0.598766	1.03979
ADARB1	peak_0049252	0.253819	0.511468	-1.03979	0.598766	1.03979
ADARB1	peak_0049253	-0.208248	0.771421	-1.03979	0.598766	1.03979
ADARB1	peak_0049254	-0.452766	0.47234	-1.03979	0.598766	1.03979
ADARB1	peak_0049255	0.0707596	0.845809	-1.03979	0.598766	1.03979
ADARB1	peak_0049256	-0.181419	0.628457	-1.03979	0.598766	1.03979
ADARB1	peak_0049257	-0.0105065	0.982325	-1.03979	0.598766	1.03979
ADARB1	peak_0049258	0.448105	0.186935	-1.03979	0.598766	1.03979
ADARB1	peak_0049259	0.232242	0.503028	-1.03979	0.598766	1.03979
ADARB1	peak_0049260	0.597856	0.191576	-1.03979	0.598766	1.03979
ADARB1	peak_0049261	-0.134624	0.738445	-1.03979	0.598766	1.03979
ADARB1	peak_0049262	-0.148464	0.626982	-1.03979	0.598766	1.03979
ADARB1	peak_0049263	0.0301157	0.961209	-1.03979	0.598766	1.03979
ADARB1	peak_0049264	-0.0121664	0.989783	-1.03979	0.598766	1.03979
ADARB1	peak_0049265	-0.0686017	0.893266	-1.03979	0.598766	1.03979
ADARB1	peak_0049266	0.134563	0.687921	-1.03979	0.598766	1.03979
ADARB1	peak_0049267	-0.44911	0.486077	-1.03979	0.598766	1.03979
ADARB2	peak_0007931	-0.511951	0.362421	1.50303	1	1.50303
ADARB2	peak_0007932	0.566511	0.331006	1.50303	1	1.50303
ADARB2	peak_0007933	0.658963	0.102654	1.50303	1	1.50303
ADARB2	peak_0007934	0.107379	0.918226	1.50303	1	1.50303
ADARB2	peak_0007935	-0.102907	0.915493	1.50303	1	1.50303
ADARB2	peak_0007936	-0.39826	0.569807	1.50303	1	1.50303
ADARB2	peak_0007937	0.610312	0.462787	1.50303	1	1.50303
ADARB2	peak_0007938	-0.0689722	0.974398	1.50303	1	1.50303
ADARB2	peak_0007939	0.119997	0.847789	1.50303	1	1.50303
ADAT1	peak_0029658	0.0775565	0.915675	-0.226831	0.707052	0.226831
ADAT1	peak_0029659	0.0720167	0.935038	-0.226831	0.707052	0.226831
ADAT1	peak_0029660	-0.0409349	0.893644	-0.226831	0.707052	0.226831
ADAT2	peak_0068088	0.465587	0.48053	-0.453791	0.275211	0.453791
ADAT2	peak_0068089	0.306261	0.310252	-0.453791	0.275211	0.453791
ADAT2	peak_0068090	0.534004	0.66546	-0.453791	0.275211	0.453791
ADAT2	peak_0068091	-0.154874	0.496748	-0.453791	0.275211	0.453791
ADCK1	peak_0024125	-0.049505	0.880442	-0.20456	0.965903	0.20456
ADCK1	peak_0024126	0.803065	0.359895	-0.20456	0.965903	0.20456
ADCK2	peak_0072909	0.132206	0.444764	0.224847	0.642101	0.224847
ADCK2	peak_0072910	0.122131	0.790141	0.224847	0.642101	0.224847
ADCK2	peak_0072911	-0.0597448	0.900589	0.224847	0.642101	0.224847
ADCK5	peak_0077002	0.00192048	0.995539	0	1	0
ADCK5	peak_0077003	0.101483	0.902842	0	1	0
ADCY1	peak_0070571	0.332763	0.812005	-1.4776	0.693772	1.4776
ADCY1	peak_0070572	0.436055	0.593432	-1.4776	0.693772	1.4776
ADCY10	peak_0005453	-0.0983383	0.869924	0.93865	0.934099	0.93865
ADCY10	peak_0005454	0.206877	0.902338	0.93865	0.934099	0.93865
ADCY10	peak_0005455	-0.995133	0.000207096	0.93865	0.934099	0.93865
ADCY10	peak_0005456	-0.301496	0.703285	0.93865	0.934099	0.93865
ADCY3	peak_0040189	0.895925	0.11508	-0.445516	0.631284	0.445516
ADCY3	peak_0040190	-0.281604	0.196542	-0.445516	0.631284	0.445516
ADCY3	peak_0040191	-0.350649	0.488363	-0.445516	0.631284	0.445516
ADCY3	peak_0040192	0.105732	0.666205	-0.445516	0.631284	0.445516
ADCY3	peak_0040193	0.150402	0.868384	-0.445516	0.631284	0.445516
ADCY4	peak_0022583	-0.428435	0.300395	0.245026	1	0.245026
ADCY4	peak_0022584	0.0330079	0.923066	0.245026	1	0.245026
ADCY4	peak_0022585	0.0198989	0.964274	0.245026	1	0.245026
ADCY5	peak_0054515	-0.152956	0.863244	0.905783	0.275583	0.905783
ADCY5	peak_0054516	0.841875	0.291757	0.905783	0.275583	0.905783
ADCY5	peak_0054517	0.128142	0.942763	0.905783	0.275583	0.905783
ADCY5	peak_0054518	0.316009	0.612571	0.905783	0.275583	0.905783
ADCY5	peak_0054519	0.429759	0.637175	0.905783	0.275583	0.905783
ADCY6	peak_0017308	-0.0408095	0.959844	0.87373	1	0.87373
ADCY7	peak_0028940	-0.0622024	0.933097	0.426542	0.00588757	0.426542
ADCY7	peak_0028941	0.160039	0.51071	0.426542	0.00588757	0.426542
ADCY7	peak_0028942	0.262658	0.419881	0.426542	0.00588757	0.426542
ADCY7	peak_0028943	0.0286902	0.949138	0.426542	0.00588757	0.426542
ADCY7	peak_0028944	-0.0279898	0.940408	0.426542	0.00588757	0.426542
ADCY8	peak_0076571	-0.466429	0.690391	0	1	0
ADCY8	peak_0076572	0.565628	0.667468	0	1	0
ADCY9	peak_0027699	0.246765	0.820292	0.758531	1	0.758531
ADCY9	peak_0027700	-0.128483	0.855117	0.758531	1	0.758531
ADCY9	peak_0027701	0.570732	0.587513	0.758531	1	0.758531
ADCY9	peak_0027702	0.122677	0.845307	0.758531	1	0.758531
ADCYAP1	peak_0034084	0.503173	0.729869	0	1	0
ADCYAP1	peak_0034085	0.838791	0.370915	0	1	0
ADD1	peak_0056779	-0.147026	0.591965	0.340775	0.221369	0.340775
ADD1	peak_0056780	0.303854	0.38237	0.340775	0.221369	0.340775
ADD1	peak_0056781	0.0334157	0.935299	0.340775	0.221369	0.340775
ADD1	peak_0056782	-0.0975491	0.629127	0.340775	0.221369	0.340775
ADD1	peak_0056783	-0.238814	0.523106	0.340775	0.221369	0.340775
ADD1	peak_0056784	-0.236806	0.694244	0.340775	0.221369	0.340775
ADD1	peak_0056785	-0.227699	0.411455	0.340775	0.221369	0.340775
ADD1	peak_0056786	0.632865	0.00143458	0.340775	0.221369	0.340775
ADD1	peak_0056787	-0.194483	0.756869	0.340775	0.221369	0.340775
ADD1	peak_0056788	-0.199482	0.870183	0.340775	0.221369	0.340775
ADD2	peak_0041728	0.336025	0.850103	0.597552	1	0.597552
ADD2	peak_0041729	-0.0356583	0.968504	0.597552	1	0.597552
ADD3	peak_0011026	0.0268905	0.924765	0.482523	0.192527	0.482523
ADD3-AS1	peak_0011027	0.0712477	0.89651	0.379852	0.38413	0.379852
ADD3-AS1	peak_0011028	-0.0218402	0.984855	0.379852	0.38413	0.379852
ADD3-AS1	peak_0011029	-0.312108	0.490521	0.379852	0.38413	0.379852
ADD3-AS1	peak_0011030	0.569519	0.372281	0.379852	0.38413	0.379852
ADD3-AS1	peak_0011031	-0.216553	0.48879	0.379852	0.38413	0.379852
ADD3-AS1	peak_0011032	-0.0107805	0.987359	0.379852	0.38413	0.379852
ADD3-AS1	peak_0011033	-0.286668	0.55222	0.379852	0.38413	0.379852
ADD3-AS1	peak_0011034	0.396087	0.0779053	0.379852	0.38413	0.379852
ADD3-AS1	peak_0011035	0.229225	0.574755	0.379852	0.38413	0.379852
ADD3-AS1	peak_0011036	-0.726843	0.0751748	0.379852	0.38413	0.379852
ADD3-AS1	peak_0011037	0.153825	0.944859	0.379852	0.38413	0.379852
ADGRA2	peak_0074439	-0.0898868	0.858549	-0.283278	0.579176	0.283278
ADGRA2	peak_0074440	0.288849	0.516438	-0.283278	0.579176	0.283278
ADGRA2	peak_0074441	0.150861	0.608329	-0.283278	0.579176	0.283278
ADGRA2	peak_0074442	0.300546	0.768715	-0.283278	0.579176	0.283278
ADGRB1	peak_0076882	-0.288299	0.48086	0.350995	0.641602	0.350995
ADGRB1	peak_0076883	-0.0823489	0.747819	0.350995	0.641602	0.350995
ADGRB1	peak_0076884	-0.159899	0.496853	0.350995	0.641602	0.350995
ADGRB1	peak_0076885	-0.180792	0.46984	0.350995	0.641602	0.350995
ADGRB1	peak_0076886	0.115712	0.577439	0.350995	0.641602	0.350995
ADGRB2	peak_0001718	0.0957291	0.830102	2.18687	0.101702	2.18687
ADGRB2	peak_0001719	-0.148372	0.728767	2.18687	0.101702	2.18687
ADGRB2	peak_0001720	0.29684	0.250027	2.18687	0.101702	2.18687
ADGRB2	peak_0001721	-0.111504	0.902506	2.18687	0.101702	2.18687
ADGRB2	peak_0001722	-0.0511305	0.808151	2.18687	0.101702	2.18687
ADGRD1	peak_0020190	0.279771	0.765613	1.69502	1	1.69502
ADGRD1	peak_0020191	-0.43316	0.748208	1.69502	1	1.69502
ADGRD1-AS1	peak_0020192	0.0504886	0.899062	0.605697	1	0.605697
ADGRD1-AS1	peak_0020193	-0.00241493	0.998153	0.605697	1	0.605697
ADGRD1-AS1	peak_0020194	0.382322	0.562035	0.605697	1	0.605697
ADGRD1-AS1	peak_0020195	0.245099	0.732985	0.605697	1	0.605697
ADGRE1	peak_0036634	-0.201451	0.273017	0.536935	1	0.536935
ADGRE1	peak_0036635	0.4972	0.442727	0.536935	1	0.536935
ADGRE1	peak_0036636	-0.0593181	0.968384	0.536935	1	0.536935
ADGRE2	peak_0037256	-0.355201	0.663353	0.175529	1	0.175529
ADGRE2	peak_0037257	-0.643707	0.0430052	0.175529	1	0.175529
ADGRE3	peak_0037252	-0.0475879	0.934002	-0.0931184	1	0.0931184
ADGRE3	peak_0037253	-0.228292	0.862339	-0.0931184	1	0.0931184
ADGRE3	peak_0037254	0.076354	0.933052	-0.0931184	1	0.0931184
ADGRE4P	peak_0036637	0.582768	0.326922	0.637975	1	0.637975
ADGRE4P	peak_0036638	0.320456	0.784735	0.637975	1	0.637975
ADGRE4P	peak_0036639	0.621714	0.406213	0.637975	1	0.637975
ADGRE4P	peak_0036640	-0.291685	0.661258	0.637975	1	0.637975
ADGRE4P	peak_0036641	-0.620915	0.0191482	0.637975	1	0.637975
ADGRE5	peak_0037212	0.41761	0.0346156	0.0375988	1	0.0375988
ADGRE5	peak_0037213	-0.272848	0.443559	0.0375988	1	0.0375988
ADGRE5	peak_0037214	-0.137973	0.436888	0.0375988	1	0.0375988
ADGRE5	peak_0037215	-0.297224	0.141384	0.0375988	1	0.0375988
ADGRE5	peak_0037216	0.235641	0.719579	0.0375988	1	0.0375988
ADGRE5	peak_0037217	-0.147751	0.849572	0.0375988	1	0.0375988
ADGRF2	peak_0066200	0.251681	0.79346	0	1	0
ADGRF3	peak_0040286	-0.174012	0.505781	-0.316717	0.629266	0.316717
ADGRF3	peak_0040287	0.234142	0.812894	-0.316717	0.629266	0.316717
ADGRF3	peak_0040288	0.0535111	0.895005	-0.316717	0.629266	0.316717
ADGRG1	peak_0029139	0.0380146	0.942829	1.6199	1	1.6199
ADGRG1	peak_0029140	0.0678684	0.957209	1.6199	1	1.6199
ADGRG1	peak_0029141	-0.0756756	0.920321	1.6199	1	1.6199
ADGRG1	peak_0029142	-0.377374	0.207112	1.6199	1	1.6199
ADGRG1	peak_0029143	-0.374831	0.558906	1.6199	1	1.6199
ADGRG1	peak_0029144	-0.171602	0.795981	1.6199	1	1.6199
ADGRG3	peak_0029145	0.852681	0.286935	1.3969	1	1.3969
ADGRG5	peak_0029136	0.594705	0.0033058	1.53929	1	1.53929
ADGRG5	peak_0029137	-0.477438	0.0635781	1.53929	1	1.53929
ADGRG5	peak_0029138	-0.124411	0.859754	1.53929	1	1.53929
ADGRG6	peak_0068031	0.757428	0.197568	0.245026	1	0.245026
ADGRG7	peak_0053838	0.00477081	0.994681	-0.476315	1	0.476315
ADGRG7	peak_0053839	0.114762	0.789179	-0.476315	1	0.476315
ADGRG7	peak_0053840	0.295889	0.757629	-0.476315	1	0.476315
ADGRG7	peak_0053841	0.216658	0.689834	-0.476315	1	0.476315
ADGRL1	peak_0037191	0.692927	0.525411	0	1	0
ADGRL1	peak_0037192	-0.106783	0.869623	0	1	0
ADGRL1	peak_0037193	0.199741	0.787069	0	1	0
ADGRL1	peak_0037194	-0.157292	0.808702	0	1	0
ADGRL1	peak_0037195	0.253054	0.43862	0	1	0
ADGRL1	peak_0037196	-0.115007	0.859875	0	1	0
ADGRL1	peak_0037197	0.170494	0.755656	0	1	0
ADGRL1	peak_0037198	0.0461607	0.96785	0	1	0
ADGRL1	peak_0037199	-0.461136	0.635875	0	1	0
ADGRL2	peak_0003140	0.745885	0.444729	0	1	0
ADGRL2	peak_0003142	0.582311	0.586251	0	1	0
ADGRL3-AS1	peak_0057934	-0.0955493	0.954639	0.245026	1	0.245026
ADGRL3-AS1	peak_0057935	0.644148	0.592195	0.245026	1	0.245026
ADGRL4	peak_0003132	0.91223	0.332479	0	1	0
ADGRL4	peak_0003133	0.326254	0.853419	0	1	0
ADGRL4	peak_0003134	-0.394353	0.287543	0	1	0
ADGRL4	peak_0003135	-0.193821	0.878188	0	1	0
ADGRL4	peak_0003136	-0.856477	0.00225121	0	1	0
ADGRV1	peak_0061818	0.349927	0.654027	0.0511332	1	0.0511332
ADGRV1	peak_0061819	-0.289126	0.704373	0.0511332	1	0.0511332
ADGRV1	peak_0061820	0.518504	0.542724	0.0511332	1	0.0511332
ADH5	peak_0058581	-0.054347	0.928121	-0.211572	0.623876	0.211572
ADHFE1	peak_0075188	0.178297	0.516438	1.0457	0.338163	1.0457
ADHFE1	peak_0075189	0.067188	0.786046	1.0457	0.338163	1.0457
ADHFE1	peak_0075190	-0.187413	0.701224	1.0457	0.338163	1.0457
ADI1	peak_0039626	-0.0308076	0.920406	0.277123	0.273641	0.277123
ADI1	peak_0039627	0.419516	0.45762	0.277123	0.273641	0.277123
ADI1	peak_0039628	0.102255	0.809023	0.277123	0.273641	0.277123
ADIPOQ	peak_0056018	-0.0832274	0.878268	0	1	0
ADIPOR1	peak_0006280	0.00666935	0.984855	0.0244404	1	0.0244404
ADIPOR2	peak_0015761	-0.066842	0.755926	0.245027	1	0.245027
ADIPOR2	peak_0015762	0.544484	0.43088	0.245027	1	0.245027
ADIRF	peak_0010214	-0.251723	0.26087	0.142539	1	0.142539
ADK	peak_0009927	-0.0929866	0.697119	-0.266758	1	0.266758
ADK	peak_0009928	0.882567	0.00477512	-0.266758	1	0.266758
ADK	peak_0009929	-0.21421	0.793941	-0.266758	1	0.266758
ADK	peak_0009930	-0.0168987	0.970645	-0.266758	1	0.266758
ADK	peak_0009931	0.116782	0.943104	-0.266758	1	0.266758
ADK	peak_0009932	0.13614	0.80192	-0.266758	1	0.266758
ADK	peak_0009933	-0.0487446	0.877601	-0.266758	1	0.266758
ADK	peak_0009934	-0.078002	0.949668	-0.266758	1	0.266758
ADK	peak_0009935	0.0745553	0.84473	-0.266758	1	0.266758
ADK	peak_0009936	0.509391	0.22963	-0.266758	1	0.266758
ADK	peak_0009937	-0.427567	0.264544	-0.266758	1	0.266758
ADK	peak_0009938	1.05717	0.327597	-0.266758	1	0.266758
ADK	peak_0009939	0.352936	0.140877	-0.266758	1	0.266758
ADK	peak_0009940	-0.155472	0.601136	-0.266758	1	0.266758
ADK	peak_0009941	0.194508	0.907867	-0.266758	1	0.266758
ADK	peak_0009942	-0.0113558	0.991617	-0.266758	1	0.266758
ADM	peak_0012159	-0.114402	0.775473	-0.2373	1	0.2373
ADM	peak_0012160	0.0627931	0.837544	-0.2373	1	0.2373
ADM2	peak_0051223	-0.0813994	0.87198	-0.595285	1	0.595285
ADM5	peak_0039096	0.069064	0.944081	-0.186858	1	0.186858
ADNP	peak_0047780	-0.476516	0.46193	-0.0655553	1	0.0655553
ADNP	peak_0047781	0.319947	0.380286	-0.0655553	1	0.0655553
ADNP	peak_0047782	0.209496	0.770866	-0.0655553	1	0.0655553
ADNP	peak_0047783	-0.476552	0.610241	-0.0655553	1	0.0655553
ADNP	peak_0047784	-0.117483	0.887656	-0.0655553	1	0.0655553
ADNP	peak_0047785	-0.162889	0.890857	-0.0655553	1	0.0655553
ADNP	peak_0047788	0.00891251	0.96853	-0.0655553	1	0.0655553
ADNP-AS1	peak_0047786	0.0163072	0.988891	-0.119118	1	0.119118
ADNP-AS1	peak_0047787	-0.266534	0.253107	-0.119118	1	0.119118
ADNP2	peak_0035949	0.420592	0.106483	-0.0620051	1	0.0620051
ADNP2	peak_0035950	-0.112996	0.897903	-0.0620051	1	0.0620051
ADNP2	peak_0035951	0.0212606	0.944043	-0.0620051	1	0.0620051
ADNP2	peak_0035952	0.434592	0.598692	-0.0620051	1	0.0620051
ADO	peak_0009502	-0.334996	0.807479	-0.546605	0.000474923	0.546605
ADO	peak_0009503	-0.76953	0.00585405	-0.546605	0.000474923	0.546605
ADO	peak_0009504	-0.157262	0.702244	-0.546605	0.000474923	0.546605
ADO	peak_0009505	-0.290093	0.543512	-0.546605	0.000474923	0.546605
ADO	peak_0009506	0.138805	0.70102	-0.546605	0.000474923	0.546605
ADO	peak_0009507	-0.40567	0.293594	-0.546605	0.000474923	0.546605
ADO	peak_0009508	-1.09632	0.307831	-0.546605	0.000474923	0.546605
ADO	peak_0009509	-0.611481	0.252061	-0.546605	0.000474923	0.546605
ADO	peak_0009510	0.0563962	0.958293	-0.546605	0.000474923	0.546605
ADO	peak_0009511	-1.60877	0.000444926	-0.546605	0.000474923	0.546605
ADO	peak_0009512	-0.470647	0.196329	-0.546605	0.000474923	0.546605
ADO	peak_0009513	-0.272957	0.475287	-0.546605	0.000474923	0.546605
ADO	peak_0009514	-0.256818	0.563949	-0.546605	0.000474923	0.546605
ADO	peak_0009515	0.190846	0.830129	-0.546605	0.000474923	0.546605
ADO	peak_0009516	-0.150899	0.721108	-0.546605	0.000474923	0.546605
ADO	peak_0009517	-0.994037	0.0183857	-0.546605	0.000474923	0.546605
ADO	peak_0009518	0.231164	0.799851	-0.546605	0.000474923	0.546605
ADO	peak_0009519	-0.713513	3.99981e-05	-0.546605	0.000474923	0.546605
ADO	peak_0009520	-0.0823374	0.682992	-0.546605	0.000474923	0.546605
ADO	peak_0009521	0.221876	0.681504	-0.546605	0.000474923	0.546605
ADORA2A	peak_0049869	1.15753	0.0231101	0.285577	1	0.285577
ADORA2A	peak_0049870	0.0748229	0.903066	0.285577	1	0.285577
ADORA2A	peak_0049871	0.000635005	0.999654	0.285577	1	0.285577
ADORA2A	peak_0049872	0.17071	0.614036	0.285577	1	0.285577
ADORA2A	peak_0049873	-0.137514	0.632708	0.285577	1	0.285577
ADORA2A	peak_0049874	0.222138	0.280923	0.285577	1	0.285577
ADORA2A	peak_0049875	-0.307782	0.149639	0.285577	1	0.285577
ADORA2A	peak_0049876	0.239123	0.405185	0.285577	1	0.285577
ADORA2A	peak_0049877	-0.0880099	0.945581	0.285577	1	0.285577
ADORA2A	peak_0049878	-0.0537041	0.937618	0.285577	1	0.285577
ADORA2A	peak_0049879	-0.299427	0.588244	0.285577	1	0.285577
ADORA2A-AS1	peak_0049880	-0.209117	0.778083	0.318693	0.901821	0.318693
ADORA2A-AS1	peak_0049881	0.194163	0.688872	0.318693	0.901821	0.318693
ADORA2B	peak_0031016	0.341065	0.762453	0.232568	1	0.232568
ADORA2B	peak_0031017	0.0122539	0.986991	0.232568	1	0.232568
ADORA2B	peak_0031018	-0.85665	0.000978272	0.232568	1	0.232568
ADORA3	peak_0004022	-0.244612	0.796125	0.37021	1	0.37021
ADORA3	peak_0004023	-0.284344	0.466967	0.37021	1	0.37021
ADORA3	peak_0004024	0.0141653	0.972997	0.37021	1	0.37021
ADORA3	peak_0004025	-0.0374261	0.905662	0.37021	1	0.37021
ADORA3	peak_0004026	-1.14452	0.00407488	0.37021	1	0.37021
ADORA3	peak_0004027	0.0688798	0.780068	0.37021	1	0.37021
ADPGK	peak_0026367	-0.0442906	0.889441	0.131096	0.590367	0.131096
ADPGK	peak_0026368	0.18046	0.552408	0.131096	0.590367	0.131096
ADPGK	peak_0026369	0.397508	0.791895	0.131096	0.590367	0.131096
ADPGK-AS1	peak_0026364	-0.464893	0.520647	0.108106	1	0.108106
ADPGK-AS1	peak_0026365	-0.412567	0.219496	0.108106	1	0.108106
ADPGK-AS1	peak_0026366	-0.339116	0.280445	0.108106	1	0.108106
ADPRH	peak_0054362	-0.511992	0.0449813	-0.383342	0.0661949	0.383342
ADPRH	peak_0054363	-0.120402	0.562112	-0.383342	0.0661949	0.383342
ADPRH	peak_0054364	-0.418504	0.529915	-0.383342	0.0661949	0.383342
ADPRH	peak_0054365	-0.162691	0.712421	-0.383342	0.0661949	0.383342
ADPRHL1	peak_0022219	0.675718	0.500937	0.490424	0.898	0.490424
ADPRHL1	peak_0022220	0.777988	0.00426279	0.490424	0.898	0.490424
ADPRHL1	peak_0022221	0.107753	0.813597	0.490424	0.898	0.490424
ADPRM	peak_0030927	-0.184236	0.487169	0.505135	0.131249	0.505135
ADPRM	peak_0030928	-0.189567	0.790137	0.505135	0.131249	0.505135
ADRA1A	peak_0074122	0.752426	0.386766	0.245026	1	0.245026
ADRA1A	peak_0074123	0.86647	0.301147	0.245026	1	0.245026
ADRA1D	peak_0046219	0.168562	0.921076	0	1	0
ADRA2A	peak_0011137	0.0726198	0.9245	-0.476315	1	0.476315
ADRA2B	peak_0042285	-0.0566507	0.728593	-1.57156	0.230095	1.57156
ADRB1	peak_0011172	0.293154	0.649627	-0.603415	1	0.603415
ADRB1	peak_0011173	0.0903603	0.870277	-0.603415	1	0.603415
ADRB1	peak_0011174	-0.0835566	0.939362	-0.603415	1	0.603415
ADRB1	peak_0011175	0.0149934	0.989236	-0.603415	1	0.603415
ADRB1	peak_0011176	-0.216124	0.452918	-0.603415	1	0.603415
ADRB1	peak_0011177	0.166106	0.832309	-0.603415	1	0.603415
ADRB1	peak_0011178	0.385459	0.713646	-0.603415	1	0.603415
ADRB1	peak_0011179	0.131877	0.807642	-0.603415	1	0.603415
ADRB1	peak_0011180	0.149869	0.870657	-0.603415	1	0.603415
ADRB1	peak_0011181	-0.740816	0.408816	-0.603415	1	0.603415
ADRB1	peak_0011182	-0.335492	0.582643	-0.603415	1	0.603415
ADRB1	peak_0011183	0.586474	0.136627	-0.603415	1	0.603415
ADRB1	peak_0011184	0.00876707	0.990525	-0.603415	1	0.603415
ADRB1	peak_0011185	-0.210506	0.830969	-0.603415	1	0.603415
ADRB1	peak_0011186	-0.258134	0.651083	-0.603415	1	0.603415
ADRB1	peak_0011187	-0.0785438	0.882926	-0.603415	1	0.603415
ADRB1	peak_0011188	0.173986	0.783397	-0.603415	1	0.603415
ADRB1	peak_0011189	0.241389	0.664431	-0.603415	1	0.603415
ADRB1	peak_0011190	-0.125025	0.878577	-0.603415	1	0.603415
ADRB2	peak_0063150	-0.153278	0.867786	0.599578	0.0870915	0.599578
ADRB2	peak_0063151	-0.323021	0.736222	0.599578	0.0870915	0.599578
ADRB2	peak_0063152	-0.573396	0.1308	0.599578	0.0870915	0.599578
ADRB2	peak_0063153	-0.870988	0.0623346	0.599578	0.0870915	0.599578
ADRB2	peak_0063154	0.0567618	0.916097	0.599578	0.0870915	0.599578
ADRB2	peak_0063155	-0.0706809	0.93021	0.599578	0.0870915	0.599578
ADRB2	peak_0063156	-0.0796957	0.870657	0.599578	0.0870915	0.599578
ADRB2	peak_0063157	0.0269354	0.946618	0.599578	0.0870915	0.599578
ADRB2	peak_0063158	-0.650426	0.0910988	0.599578	0.0870915	0.599578
ADRB2	peak_0063159	0.19496	0.803515	0.599578	0.0870915	0.599578
ADRB2	peak_0063160	-0.00475453	0.996102	0.599578	0.0870915	0.599578
ADRB2	peak_0063161	0.031258	0.927173	0.599578	0.0870915	0.599578
ADRB2	peak_0063162	-0.274136	0.0996429	0.599578	0.0870915	0.599578
ADRB2	peak_0063163	-0.0889484	0.82857	0.599578	0.0870915	0.599578
ADRB2	peak_0063164	-0.853304	0.000182391	0.599578	0.0870915	0.599578
ADRB2	peak_0063165	0.0619221	0.926813	0.599578	0.0870915	0.599578
ADRB2	peak_0063166	-0.0662012	0.953534	0.599578	0.0870915	0.599578
ADRB2	peak_0063167	0.0652914	0.945379	0.599578	0.0870915	0.599578
ADRB2	peak_0063168	0.561559	0.481368	0.599578	0.0870915	0.599578
ADRM1	peak_0048130	-0.247348	0.194734	-0.517372	0.0032251	0.517372
ADRM1	peak_0048131	0.144493	0.748107	-0.517372	0.0032251	0.517372
ADRM1	peak_0048132	-0.122377	0.796298	-0.517372	0.0032251	0.517372
ADRM1	peak_0048133	-0.330177	0.494727	-0.517372	0.0032251	0.517372
ADRM1	peak_0048134	-0.141196	0.531315	-0.517372	0.0032251	0.517372
ADSL	peak_0050635	-0.0543568	0.940907	-0.393394	0.229881	0.393394
ADSL	peak_0050636	0.331969	0.38237	-0.393394	0.229881	0.393394
ADSL	peak_0050637	0.379853	0.778418	-0.393394	0.229881	0.393394
ADSL	peak_0050638	-0.493106	0.111155	-0.393394	0.229881	0.393394
ADSL	peak_0050639	-0.167869	0.516706	-0.393394	0.229881	0.393394
ADTRP	peak_0064678	-0.658956	0.224023	0.851839	0.254836	0.851839
ADTRP	peak_0064679	0.0200126	0.991324	0.851839	0.254836	0.851839
ADTRP	peak_0064680	-0.329748	0.663769	0.851839	0.254836	0.851839
ADTRP	peak_0064681	-0.453201	0.0425189	0.851839	0.254836	0.851839
ADTRP	peak_0064682	-0.509751	0.00963222	0.851839	0.254836	0.851839
ADTRP	peak_0064683	-0.614499	0.286806	0.851839	0.254836	0.851839
ADTRP	peak_0064684	-0.118725	0.738911	0.851839	0.254836	0.851839
ADTRP	peak_0064685	-0.305424	0.152377	0.851839	0.254836	0.851839
ADTRP	peak_0064686	0.403954	0.0297095	0.851839	0.254836	0.851839
ADTRP	peak_0064687	0.308221	0.407757	0.851839	0.254836	0.851839
ADTRP	peak_0064688	-0.576444	0.00286742	0.851839	0.254836	0.851839
ADTRP	peak_0064689	-0.241532	0.872225	0.851839	0.254836	0.851839
ADTRP	peak_0064690	1.065	0.0182923	0.851839	0.254836	0.851839
ADTRP	peak_0064691	-0.827449	0.306277	0.851839	0.254836	0.851839
ADTRP	peak_0064692	0.161423	0.532821	0.851839	0.254836	0.851839
ADTRP	peak_0064693	0.0903108	0.799548	0.851839	0.254836	0.851839
ADTRP	peak_0064694	0.673679	0.566908	0.851839	0.254836	0.851839
ADTRP	peak_0064695	0.364049	0.623003	0.851839	0.254836	0.851839
ADTRP	peak_0064696	-0.155037	0.766	0.851839	0.254836	0.851839
ADTRP	peak_0064697	-0.406443	0.502735	0.851839	0.254836	0.851839
ADTRP	peak_0064698	0.0180341	0.984836	0.851839	0.254836	0.851839
ADTRP	peak_0064699	-1.28428	0.00380126	0.851839	0.254836	0.851839
ADTRP	peak_0064700	-0.152516	0.68419	0.851839	0.254836	0.851839
ADTRP	peak_0064701	0.146112	0.716776	0.851839	0.254836	0.851839
ADTRP	peak_0064702	-0.313386	0.58599	0.851839	0.254836	0.851839
ADTRP	peak_0064703	-0.038268	0.940907	0.851839	0.254836	0.851839
ADTRP	peak_0064704	-0.0539273	0.888727	0.851839	0.254836	0.851839
AEBP1	peak_0070499	0.0519854	0.891746	0.900615	0.862132	0.900615
AEBP1	peak_0070500	0.219399	0.457971	0.900615	0.862132	0.900615
AEBP1	peak_0070501	-0.168485	0.823194	0.900615	0.862132	0.900615
AEBP1	peak_0070502	0.21307	0.728767	0.900615	0.862132	0.900615
AEBP1	peak_0070503	0.00211889	0.996234	0.900615	0.862132	0.900615
AEBP2	peak_0016498	0.140488	0.945921	-0.145045	1	0.145045
AEBP2	peak_0016499	0.47648	0.70061	-0.145045	1	0.145045
AEBP2	peak_0016500	0.0921984	0.650502	-0.145045	1	0.145045
AEBP2	peak_0016501	-0.0945042	0.772164	-0.145045	1	0.145045
AEBP2	peak_0016502	1.00411	0.316628	-0.145045	1	0.145045
AEBP2	peak_0016503	0.40276	0.711173	-0.145045	1	0.145045
AEN	peak_0026944	-0.111545	0.60391	-0.318168	0.034735	0.318168
AEN	peak_0026945	0.217155	0.472657	-0.318168	0.034735	0.318168
AEN	peak_0026946	0.106849	0.770206	-0.318168	0.034735	0.318168
AEN	peak_0026947	1.10239	0.00165095	-0.318168	0.034735	0.318168
AFAP1-AS1	peak_0056945	0.0147568	0.994911	0.953241	1	0.953241
AFAP1L2	peak_0011195	0.517092	0.577752	1.03873	0.0207497	1.03873
AFDN	peak_0069061	0.0189672	0.984718	0.162197	1	0.162197
AFDN	peak_0069062	0.110115	0.650614	0.162197	1	0.162197
AFDN	peak_0069063	0.149014	0.789866	0.162197	1	0.162197
AFDN	peak_0069064	0.1765	0.877425	0.162197	1	0.162197
AFF1	peak_0058448	-0.123432	0.584109	0.131359	1	0.131359
AFF1	peak_0058449	0.372145	0.465001	0.131359	1	0.131359
AFF1	peak_0058450	0.184303	0.704373	0.131359	1	0.131359
AFF1	peak_0058451	-0.593133	0.00926001	0.131359	1	0.131359
AFF1	peak_0058452	0.501773	0.50829	0.131359	1	0.131359
AFF1	peak_0058453	-0.910162	0.0280768	0.131359	1	0.131359
AFF1	peak_0058454	0.225978	0.675064	0.131359	1	0.131359
AFF1	peak_0058455	0.207038	0.678762	0.131359	1	0.131359
AFF1	peak_0058456	-0.0900188	0.738445	0.131359	1	0.131359
AFF1	peak_0058457	-0.325682	0.351242	0.131359	1	0.131359
AFF1	peak_0058458	0.202688	0.704315	0.131359	1	0.131359
AFF1	peak_0058459	-0.0989896	0.940678	0.131359	1	0.131359
AFF1	peak_0058460	0.0531209	0.915228	0.131359	1	0.131359
AFF1	peak_0058461	0.0902324	0.882823	0.131359	1	0.131359
AFF1	peak_0058462	-0.214759	0.660478	0.131359	1	0.131359
AFF2	peak_0082720	0.075177	0.956781	0.734411	1	0.734411
AFF2	peak_0082721	-0.525975	0.641096	0.734411	1	0.734411
AFF2	peak_0082722	-0.296138	0.268834	0.734411	1	0.734411
AFF2	peak_0082723	0.505503	0.359691	0.734411	1	0.734411
AFF2	peak_0082724	-0.623761	0.474855	0.734411	1	0.734411
AFF2	peak_0082725	0.209402	0.6864	0.734411	1	0.734411
AFF2	peak_0082726	0.0671191	0.955245	0.734411	1	0.734411
AFF2	peak_0082727	0.0417661	0.919508	0.734411	1	0.734411
AFF2	peak_0082728	0.716364	0.273984	0.734411	1	0.734411
AFF2	peak_0082729	0.470103	0.0841648	0.734411	1	0.734411
AFF2	peak_0082730	-0.257635	0.82403	0.734411	1	0.734411
AFF3	peak_0042456	0.126238	0.77885	0.705727	0.00931526	0.705727
AFF3	peak_0042457	0.984149	0.326171	0.705727	0.00931526	0.705727
AFF3	peak_0042458	0.0445684	0.934881	0.705727	0.00931526	0.705727
AFF3	peak_0042459	0.0928275	0.915915	0.705727	0.00931526	0.705727
AFF3	peak_0042460	0.238778	0.738228	0.705727	0.00931526	0.705727
AFF3	peak_0042461	-0.437257	0.440313	0.705727	0.00931526	0.705727
AFF3	peak_0042462	0.190705	0.857844	0.705727	0.00931526	0.705727
AFF3	peak_0042463	0.0953643	0.919667	0.705727	0.00931526	0.705727
AFF3	peak_0042464	-0.284353	0.654957	0.705727	0.00931526	0.705727
AFF3	peak_0042465	0.04431	0.942518	0.705727	0.00931526	0.705727
AFF3	peak_0042466	-0.24464	0.744628	0.705727	0.00931526	0.705727
AFF3	peak_0042467	-0.57846	0.224688	0.705727	0.00931526	0.705727
AFF3	peak_0042468	-0.0743806	0.943462	0.705727	0.00931526	0.705727
AFF3	peak_0042469	-0.238706	0.859127	0.705727	0.00931526	0.705727
AFF3	peak_0042470	0.0918491	0.942107	0.705727	0.00931526	0.705727
AFF3	peak_0042471	-0.0574614	0.942413	0.705727	0.00931526	0.705727
AFF3	peak_0042472	-0.0370051	0.899337	0.705727	0.00931526	0.705727
AFF3	peak_0042473	0.470904	0.0470657	0.705727	0.00931526	0.705727
AFF3	peak_0042474	0.0738419	0.839197	0.705727	0.00931526	0.705727
AFF3	peak_0042475	1.28469	0.38916	0.705727	0.00931526	0.705727
AFF3	peak_0042476	-0.255259	0.680739	0.705727	0.00931526	0.705727
AFF3	peak_0042477	-0.131723	0.74085	0.705727	0.00931526	0.705727
AFF3	peak_0042478	0.0119501	0.981017	0.705727	0.00931526	0.705727
AFF3	peak_0042479	-0.252876	0.266411	0.705727	0.00931526	0.705727
AFF3	peak_0042480	0.332788	0.703924	0.705727	0.00931526	0.705727
AFF3	peak_0042481	-0.602898	0.647286	0.705727	0.00931526	0.705727
AFF3	peak_0042482	-0.0273653	0.976913	0.705727	0.00931526	0.705727
AFF4	peak_0062615	0.601907	0.645504	0.152727	0.977017	0.152727
AFF4	peak_0062616	0.247641	0.862124	0.152727	0.977017	0.152727
AFF4	peak_0062617	-0.0300557	0.928736	0.152727	0.977017	0.152727
AFG1L	peak_0067137	-0.16081	0.84083	0.00988709	1	0.00988709
AFG1L	peak_0067138	-0.12994	0.637889	0.00988709	1	0.00988709
AFG1L	peak_0067139	0.162425	0.852967	0.00988709	1	0.00988709
AFG1L	peak_0067140	0.728848	0.437706	0.00988709	1	0.00988709
AFG1L	peak_0067141	0.341863	0.7038	0.00988709	1	0.00988709
AFG1L	peak_0067142	0.412556	0.125669	0.00988709	1	0.00988709
AFG1L	peak_0067143	0.661672	0.28607	0.00988709	1	0.00988709
AFG1L	peak_0067144	0.414947	0.285806	0.00988709	1	0.00988709
AFG3L2	peak_0034392	-0.875033	0.161406	-0.661335	0.00380017	0.661335
AFG3L2	peak_0034393	0.286173	0.870657	-0.661335	0.00380017	0.661335
AFG3L2	peak_0034394	-0.0874518	0.766405	-0.661335	0.00380017	0.661335
AFG3L2	peak_0034395	0.108622	0.82678	-0.661335	0.00380017	0.661335
AFMID	peak_0033659	0.495541	0.029824	0.420957	1	0.420957
AFMID	peak_0033660	0.0648532	0.892372	0.420957	1	0.420957
AFTPH	peak_0041471	0.0162886	0.951185	-0.245796	0.574185	0.245796
AGA	peak_0059910	-0.0957953	0.757392	-0.420678	0.089348	0.420678
AGA	peak_0059911	-0.456976	0.759632	-0.420678	0.089348	0.420678
AGA	peak_0059912	0.565791	0.583096	-0.420678	0.089348	0.420678
AGAP1	peak_0045791	0.752217	0.388667	0	1	0
AGAP1	peak_0045792	0.2405	0.910846	0	1	0
AGAP1	peak_0045793	0.251206	0.860919	0	1	0
AGAP2	peak_0017917	0.171106	0.594222	0.0698306	1	0.0698306
AGAP2	peak_0017918	0.00196136	0.995362	0.0698306	1	0.0698306
AGAP2-AS1	peak_0017914	0.64108	0.0289592	0.127781	1	0.127781
AGAP2-AS1	peak_0017915	0.167332	0.767304	0.127781	1	0.127781
AGAP2-AS1	peak_0017916	0.0759621	0.902325	0.127781	1	0.127781
AGAP3	peak_0073134	0.00404784	0.990869	0.417585	0.260656	0.417585
AGAP3	peak_0073135	0.120978	0.630543	0.417585	0.260656	0.417585
AGAP3	peak_0073136	-0.288799	0.701417	0.417585	0.260656	0.417585
AGAP3	peak_0073137	0.169979	0.516536	0.417585	0.260656	0.417585
AGAP3	peak_0073138	0.055489	0.895555	0.417585	0.260656	0.417585
AGAP7P	peak_0009161	0.421749	0.106954	1.68672	0.248152	1.68672
AGAP7P	peak_0009162	0.67964	0.268355	1.68672	0.248152	1.68672
AGAP7P	peak_0009163	0.0335641	0.916938	1.68672	0.248152	1.68672
AGBL2	peak_0012887	0.022176	0.946455	0.245026	1	0.245026
AGBL3	peak_0072715	-0.185576	0.907755	0.260712	1	0.260712
AGBL3	peak_0072716	0.00815	0.979912	0.260712	1	0.260712
AGBL3	peak_0072717	-0.412159	0.130806	0.260712	1	0.260712
AGBL3	peak_0072718	-0.276155	0.380293	0.260712	1	0.260712
AGBL4	peak_0002534	0.401891	0.740435	-0.633152	1	0.633152
AGBL5	peak_0040310	-0.144666	0.498039	0.0240143	1	0.0240143
AGBL5-AS1	peak_0040309	-0.279506	0.340186	-0.511642	1	0.511642
AGFG1	peak_0045453	0.0380673	0.888591	-0.330463	0.0675643	0.330463
AGFG1	peak_0045454	0.168442	0.844585	-0.330463	0.0675643	0.330463
AGFG1	peak_0045455	-0.32452	0.312683	-0.330463	0.0675643	0.330463
AGFG1	peak_0045456	0.245612	0.797347	-0.330463	0.0675643	0.330463
AGFG2	peak_0071756	0.234106	0.693572	0.140728	0.995569	0.140728
AGFG2	peak_0071757	-0.12221	0.865435	0.140728	0.995569	0.140728
AGFG2	peak_0071758	0.50022	0.515685	0.140728	0.995569	0.140728
AGFG2	peak_0071759	-0.00583472	0.989354	0.140728	0.995569	0.140728
AGFG2	peak_0071760	-0.506738	0.0673685	0.140728	0.995569	0.140728
AGFG2	peak_0071761	0.219427	0.502836	0.140728	0.995569	0.140728
AGFG2	peak_0071762	-0.195389	0.57501	0.140728	0.995569	0.140728
AGGF1	peak_0061446	-0.175634	0.358142	-0.26112	0.0251848	0.26112
AGK	peak_0072928	-0.0810985	0.801282	-0.9321	0.00380827	0.9321
AGK	peak_0072929	0.700595	0.482976	-0.9321	0.00380827	0.9321
AGK	peak_0072930	-0.0981729	0.943486	-0.9321	0.00380827	0.9321
AGL	peak_0003637	-0.0351038	0.969497	-0.0737636	1	0.0737636
AGL	peak_0003638	-0.12065	0.562601	-0.0737636	1	0.0737636
AGMAT	peak_0000717	-0.0108596	0.976518	-0.843139	0.0383917	0.843139
AGMAT	peak_0000718	-0.257921	0.353624	-0.843139	0.0383917	0.843139
AGMAT	peak_0000719	0.168661	0.847411	-0.843139	0.0383917	0.843139
AGMAT	peak_0000720	-0.0385156	0.933696	-0.843139	0.0383917	0.843139
AGMAT	peak_0000721	-0.251897	0.133319	-0.843139	0.0383917	0.843139
AGMO	peak_0069703	0.864123	0.272496	0	1	0
AGMO	peak_0069704	0.427698	0.703171	0	1	0
AGO1	peak_0001907	-0.0696425	0.756841	-0.0455603	1	0.0455603
AGO1	peak_0001908	-0.428812	0.122272	-0.0455603	1	0.0455603
AGO2	peak_0076817	-0.395354	0.0453645	-0.129819	1	0.129819
AGO2	peak_0076818	0.112792	0.700724	-0.129819	1	0.129819
AGO2	peak_0076819	-0.201612	0.36514	-0.129819	1	0.129819
AGO2	peak_0076820	0.360992	0.401571	-0.129819	1	0.129819
AGO2	peak_0076821	-0.359886	0.491155	-0.129819	1	0.129819
AGO2	peak_0076822	-0.0456031	0.940783	-0.129819	1	0.129819
AGO2	peak_0076823	-0.0930349	0.646271	-0.129819	1	0.129819
AGO2	peak_0076824	0.00321139	0.994176	-0.129819	1	0.129819
AGO2	peak_0076825	-0.154011	0.831071	-0.129819	1	0.129819
AGO3	peak_0001909	0.0275746	0.980253	0.210853	0.568442	0.210853
AGO3	peak_0001910	-0.274217	0.129934	0.210853	0.568442	0.210853
AGO3	peak_0001911	-0.393692	0.335811	0.210853	0.568442	0.210853
AGO4	peak_0001904	-0.267608	0.517299	0.440832	0.219627	0.440832
AGO4	peak_0001905	0.0208905	0.974398	0.440832	0.219627	0.440832
AGO4	peak_0001906	0.00135019	0.99736	0.440832	0.219627	0.440832
AGPAT1	peak_0069114	0.0137953	0.987359	-0.205677	1	0.205677
AGPAT2	peak_0080389	0.045419	0.822356	0.295225	0.926399	0.295225
AGPAT2	peak_0080390	0.0995546	0.760796	0.295225	0.926399	0.295225
AGPAT3	peak_0049164	-0.229591	0.332222	-0.201197	0.973757	0.201197
AGPAT3	peak_0049165	0.433256	0.21836	-0.201197	0.973757	0.201197
AGPAT3	peak_0049166	-0.139654	0.64695	-0.201197	0.973757	0.201197
AGPAT3	peak_0049167	-0.0629842	0.865113	-0.201197	0.973757	0.201197
AGPAT3	peak_0049168	-0.280705	0.173595	-0.201197	0.973757	0.201197
AGPAT3	peak_0049169	-0.781827	0.228702	-0.201197	0.973757	0.201197
AGPAT3	peak_0049170	0.33316	0.700521	-0.201197	0.973757	0.201197
AGPAT3	peak_0049171	-0.0162276	0.977182	-0.201197	0.973757	0.201197
AGPAT3	peak_0049172	0.00835994	0.990069	-0.201197	0.973757	0.201197
AGPAT3	peak_0049173	0.943508	0.229432	-0.201197	0.973757	0.201197
AGPAT3	peak_0049174	-0.092341	0.790141	-0.201197	0.973757	0.201197
AGPAT3	peak_0049175	-0.303212	0.449125	-0.201197	0.973757	0.201197
AGPAT3	peak_0049176	-0.170457	0.695106	-0.201197	0.973757	0.201197
AGPAT3	peak_0049177	-0.0908417	0.708394	-0.201197	0.973757	0.201197
AGPAT3	peak_0049178	0.146047	0.814524	-0.201197	0.973757	0.201197
AGPAT3	peak_0049179	0.282488	0.867343	-0.201197	0.973757	0.201197
AGPAT4	peak_0068895	0.0169692	0.983281	0.264238	1	0.264238
AGPAT4	peak_0068896	-0.158333	0.91391	0.264238	1	0.264238
AGPAT4	peak_0068897	-0.0547808	0.956812	0.264238	1	0.264238
AGPAT5	peak_0073440	0.00646384	0.984772	-1.24932	1	1.24932
AGPAT5	peak_0073441	0.26853	0.240354	-1.24932	1	1.24932
AGPAT5	peak_0073442	0.10968	0.895828	-1.24932	1	1.24932
AGPS	peak_0044213	-0.120734	0.718962	-0.340798	0.284996	0.340798
AGRN	peak_0000033	0.0120687	0.970672	-0.266382	1	0.266382
AGRN	peak_0000034	-0.0365625	0.913378	-0.266382	1	0.266382
AGRN	peak_0000035	-0.981302	0.0249725	-0.266382	1	0.266382
AGRN	peak_0000036	0.0246269	0.965614	-0.266382	1	0.266382
AGRP	peak_0029283	-0.0609399	0.85755	0.845661	0.76214	0.845661
AGRP	peak_0029284	0.593112	0.161753	0.845661	0.76214	0.845661
AGTPBP1	peak_0078397	-0.0474249	0.978118	-0.239542	0.590367	0.239542
AGTPBP1	peak_0078398	-0.274502	0.853303	-0.239542	0.590367	0.239542
AGTPBP1	peak_0078399	0.49284	0.7377	-0.239542	0.590367	0.239542
AGTPBP1	peak_0078400	-0.118972	0.771982	-0.239542	0.590367	0.239542
AGTPBP1	peak_0078401	-0.139429	0.751344	-0.239542	0.590367	0.239542
AGTPBP1	peak_0078402	-0.84255	0.00301976	-0.239542	0.590367	0.239542
AGTPBP1	peak_0078403	0.321897	0.438796	-0.239542	0.590367	0.239542
AGTPBP1	peak_0078404	-0.325682	0.224602	-0.239542	0.590367	0.239542
AGTPBP1	peak_0078405	0.953828	0.0172107	-0.239542	0.590367	0.239542
AGTPBP1	peak_0078406	-0.0421353	0.873932	-0.239542	0.590367	0.239542
AGTPBP1	peak_0078407	-0.656194	0.176207	-0.239542	0.590367	0.239542
AGTRAP	peak_0000562	0.00180446	0.996124	0.631356	0.0836601	0.631356
AGTRAP	peak_0000563	-0.112862	0.798663	0.631356	0.0836601	0.631356
AGTRAP	peak_0000564	0.029777	0.913808	0.631356	0.0836601	0.631356
AGXT	peak_0045943	-0.0786009	0.888727	0	1	0
AHCTF1	peak_0007780	-0.150514	0.547162	-0.0830049	1	0.0830049
AHCTF1	peak_0007781	-0.360692	0.224963	-0.0830049	1	0.0830049
AHCTF1	peak_0007782	-0.856131	0.176667	-0.0830049	1	0.0830049
AHCY	peak_0046927	-0.150783	0.5374	-0.542692	0.0748754	0.542692
AHCY	peak_0046928	-0.0360738	0.905549	-0.542692	0.0748754	0.542692
AHCYL1	peak_0003917	-0.933847	0.114876	-0.237606	0.160258	0.237606
AHCYL1	peak_0003918	0.00849293	0.981602	-0.237606	0.160258	0.237606
AHCYL1	peak_0003919	-0.432108	0.40818	-0.237606	0.160258	0.237606
AHCYL1	peak_0003920	0.121383	0.728094	-0.237606	0.160258	0.237606
AHCYL1	peak_0003921	0.191528	0.535978	-0.237606	0.160258	0.237606
AHCYL2	peak_0072507	0.198331	0.613219	0.440989	0.00381653	0.440989
AHCYL2	peak_0072508	-0.106134	0.806079	0.440989	0.00381653	0.440989
AHCYL2	peak_0072509	-0.0136811	0.965775	0.440989	0.00381653	0.440989
AHCYL2	peak_0072510	-0.0371067	0.953491	0.440989	0.00381653	0.440989
AHCYL2	peak_0072511	-0.352325	0.254525	0.440989	0.00381653	0.440989
AHCYL2	peak_0072512	0.214893	0.55939	0.440989	0.00381653	0.440989
AHCYL2	peak_0072513	-0.0318127	0.973603	0.440989	0.00381653	0.440989
AHDC1	peak_0001512	0.165728	0.711826	-0.609649	0.0222523	0.609649
AHDC1	peak_0001513	-0.375703	0.555949	-0.609649	0.0222523	0.609649
AHDC1	peak_0001514	0.266728	0.0893316	-0.609649	0.0222523	0.609649
AHDC1	peak_0001515	0.135203	0.690034	-0.609649	0.0222523	0.609649
AHDC1	peak_0001516	-0.567829	0.137792	-0.609649	0.0222523	0.609649
AHDC1	peak_0001517	-0.474938	0.197231	-0.609649	0.0222523	0.609649
AHDC1	peak_0001518	-0.724341	0.028644	-0.609649	0.0222523	0.609649
AHDC1	peak_0001519	-0.480113	0.0530774	-0.609649	0.0222523	0.609649
AHDC1	peak_0001520	-0.172901	0.251053	-0.609649	0.0222523	0.609649
AHDC1	peak_0001521	0.260258	0.204494	-0.609649	0.0222523	0.609649
AHI1	peak_0067781	-0.11844	0.867921	0.07252	1	0.07252
AHI1	peak_0067782	0.143183	0.822316	0.07252	1	0.07252
AHI1	peak_0067783	-0.0937394	0.901226	0.07252	1	0.07252
AHI1	peak_0067784	-0.123716	0.790141	0.07252	1	0.07252
AHI1	peak_0067785	-0.0114737	0.994681	0.07252	1	0.07252
AHI1	peak_0067786	0.27193	0.564908	0.07252	1	0.07252
AHNAK	peak_0013251	-0.202997	0.436391	0.505293	0.107139	0.505293
AHNAK	peak_0013252	-0.335844	0.521279	0.505293	0.107139	0.505293
AHNAK	peak_0013253	-0.304232	0.464208	0.505293	0.107139	0.505293
AHNAK	peak_0013254	-0.0717849	0.839197	0.505293	0.107139	0.505293
AHNAK	peak_0013255	-0.247963	0.209145	0.505293	0.107139	0.505293
AHNAK	peak_0013256	-0.0910302	0.677453	0.505293	0.107139	0.505293
AHNAK	peak_0013257	-0.168673	0.250844	0.505293	0.107139	0.505293
AHNAK	peak_0013258	-0.303289	0.130297	0.505293	0.107139	0.505293
AHNAK	peak_0013259	0.36801	0.0317909	0.505293	0.107139	0.505293
AHNAK2	peak_0024848	0.249624	0.823285	-0.0570747	1	0.0570747
AHNAK2	peak_0024849	-0.118205	0.655949	-0.0570747	1	0.0570747
AHR	peak_0069718	-0.348156	0.778445	-0.314893	1	0.314893
AHR	peak_0069719	-0.36939	0.544245	-0.314893	1	0.314893
AHR	peak_0069720	1.02806	0.220414	-0.314893	1	0.314893
AHR	peak_0069721	0.341714	0.522765	-0.314893	1	0.314893
AHRR	peak_0060144	0.59787	0.302518	1.34819	1	1.34819
AHRR	peak_0060145	-0.0847927	0.875459	1.34819	1	1.34819
AHRR	peak_0060146	-0.000433632	0.999654	1.34819	1	1.34819
AHRR	peak_0060147	0.0738063	0.912939	1.34819	1	1.34819
AHRR	peak_0060148	0.260936	0.834803	1.34819	1	1.34819
AHRR	peak_0060149	-0.810312	0.0789946	1.34819	1	1.34819
AHSA1	peak_0024103	-0.118183	0.685966	-0.596892	0.00144674	0.596892
AHSA2P	peak_0041344	-0.00396282	0.988791	0.422288	0.188256	0.422288
AHSA2P	peak_0041345	0.00293155	0.997395	0.422288	0.188256	0.422288
AHSA2P	peak_0041346	1.10113	0.327177	0.422288	0.188256	0.422288
AHSG	peak_0056001	-0.143184	0.909119	0	1	0
AHSG	peak_0056002	0.538341	0.0809249	0	1	0
AHSG	peak_0056003	-0.0239466	0.949108	0	1	0
AHSP	peak_0028762	0.109623	0.889849	-4.0254	0.0939148	4.0254
AICDA	peak_0016072	1.4965	0.158709	2.22898	0.906853	2.22898
AICDA	peak_0016073	-0.406411	0.486508	2.22898	0.906853	2.22898
AICDA	peak_0016074	0.0301225	0.983738	2.22898	0.906853	2.22898
AICDA	peak_0016075	0.243745	0.756434	2.22898	0.906853	2.22898
AICDA	peak_0016076	0.383043	0.718308	2.22898	0.906853	2.22898
AIDA	peak_0007032	0.180377	0.624595	0.219218	0.919649	0.219218
AIF1L	peak_0080058	-0.164678	0.78995	-0.255914	1	0.255914
AIF1L	peak_0080059	0.307657	0.82403	-0.255914	1	0.255914
AIFM1	peak_0082552	-0.0498652	0.864566	-0.261471	0.230136	0.261471
AIFM2	peak_0009687	-0.0730353	0.906383	-0.326941	0.237938	0.326941
AIFM2	peak_0009688	0.484328	0.490944	-0.326941	0.237938	0.326941
AIFM2	peak_0009689	-0.126722	0.62495	-0.326941	0.237938	0.326941
AIFM3	peak_0049617	-0.228636	0.670199	1.27438	0.643745	1.27438
AIFM3	peak_0049618	0.12867	0.872984	1.27438	0.643745	1.27438
AIFM3	peak_0049619	0.163444	0.684817	1.27438	0.643745	1.27438
AIFM3	peak_0049620	0.0534231	0.957438	1.27438	0.643745	1.27438
AIG1	peak_0068082	0.329627	0.787987	0.112951	1	0.112951
AIG1	peak_0068083	0.0873504	0.661715	0.112951	1	0.112951
AIG1	peak_0068084	-0.261235	0.792008	0.112951	1	0.112951
AIG1	peak_0068085	0.126027	0.701045	0.112951	1	0.112951
AIG1	peak_0068086	-0.234413	0.625394	0.112951	1	0.112951
AIG1	peak_0068087	0.337494	0.61074	0.112951	1	0.112951
AIM2	peak_0005122	-0.838354	0.129437	1.01364	0.0271515	1.01364
AIM2	peak_0005123	-0.453175	0.437173	1.01364	0.0271515	1.01364
AIM2	peak_0005124	0.659524	0.0137977	1.01364	0.0271515	1.01364
AIM2	peak_0005125	0.240621	0.366068	1.01364	0.0271515	1.01364
AIM2	peak_0005126	-0.228393	0.41099	1.01364	0.0271515	1.01364
AIM2	peak_0005127	0.277579	0.264703	1.01364	0.0271515	1.01364
AIMP2	peak_0069551	-0.0726911	0.778057	-1.27085	9.30679e-06	1.27085
AIP	peak_0013704	0.329198	0.728616	0.0130255	1	0.0130255
AIP	peak_0013705	-0.0894918	0.75792	0.0130255	1	0.0130255
AIP	peak_0013706	-0.171279	0.417915	0.0130255	1	0.0130255
AIP	peak_0013707	0.414766	0.126154	0.0130255	1	0.0130255
AIPL1	peak_0030708	0.314006	0.558755	-0.476315	1	0.476315
AIPL1	peak_0030709	0.103577	0.888205	-0.476315	1	0.476315
AIRE	peak_0049196	-0.391672	0.324225	0.554015	1	0.554015
AIRE	peak_0049197	0.368139	0.544667	0.554015	1	0.554015
AIRN	peak_0068870	-0.16942	0.714413	1.11728	1	1.11728
AIRN	peak_0068871	0.630003	0.258555	1.11728	1	1.11728
AIRN	peak_0068872	0.591688	0.276226	1.11728	1	1.11728
AIRN	peak_0068873	0.445372	0.350883	1.11728	1	1.11728
AJAP1	peak_0000260	0.385786	0.250844	0.245027	1	0.245027
AJAP1	peak_0000261	0.0778846	0.948897	0.245027	1	0.245027
AJM1	peak_0080413	-0.149971	0.485506	-0.0124127	1	0.0124127
AJM1	peak_0080414	-0.166691	0.67779	-0.0124127	1	0.0124127
AJUBA	peak_0022503	0.097914	0.917874	-0.439564	0.728038	0.439564
AJUBA	peak_0022504	-0.20306	0.712212	-0.439564	0.728038	0.439564
AJUBA	peak_0022505	-0.137174	0.619584	-0.439564	0.728038	0.439564
AJUBA	peak_0022506	-0.0373289	0.939329	-0.439564	0.728038	0.439564
AK1	peak_0079842	0.506827	0.433106	0.549894	0.643079	0.549894
AK1	peak_0079843	-0.105549	0.71491	0.549894	0.643079	0.549894
AK2	peak_0001826	-0.0561647	0.953306	-0.440908	0.012768	0.440908
AK2	peak_0001827	-1.2789	0.000153098	-0.440908	0.012768	0.440908
AK2	peak_0001828	-0.00214149	0.996184	-0.440908	0.012768	0.440908
AK2	peak_0001829	-0.24855	0.15184	-0.440908	0.012768	0.440908
AK3	peak_0077169	-0.634015	0.662926	0.18767	0.565595	0.18767
AK3	peak_0077170	0.0892942	0.642725	0.18767	0.565595	0.18767
AK3	peak_0077171	0.166185	0.84941	0.18767	0.565595	0.18767
AK3	peak_0077172	-0.07626	0.890857	0.18767	0.565595	0.18767
AK3	peak_0077173	-0.053576	0.87303	0.18767	0.565595	0.18767
AK4	peak_0002919	0.144948	0.872603	-3.40226	0.0594711	3.40226
AK4	peak_0002920	0.227856	0.76722	-3.40226	0.0594711	3.40226
AK4	peak_0002921	-0.0781146	0.913553	-3.40226	0.0594711	3.40226
AK4	peak_0002922	-0.354542	0.556623	-3.40226	0.0594711	3.40226
AK5	peak_0003108	0.243491	0.73129	0.40323	1	0.40323
AK5	peak_0003109	0.236317	0.828554	0.40323	1	0.40323
AK5	peak_0003110	2.0306	0.0812768	0.40323	1	0.40323
AK7	peak_0024536	0.0272791	0.96853	1.06053	0.928179	1.06053
AK7	peak_0024537	0.00194795	0.995661	1.06053	0.928179	1.06053
AK7	peak_0024538	0.239342	0.489711	1.06053	0.928179	1.06053
AK7	peak_0024539	0.276264	0.738966	1.06053	0.928179	1.06053
AK9	peak_0067209	-0.0280249	0.970685	0.300625	0.559887	0.300625
AK9	peak_0067210	0.0460819	0.972575	0.300625	0.559887	0.300625
AK9	peak_0067211	-0.498714	0.00394991	0.300625	0.559887	0.300625
AK9	peak_0067212	-0.0626396	0.824718	0.300625	0.559887	0.300625
AKAP1	peak_0032604	0.0346565	0.893706	-0.520751	0.0338345	0.520751
AKAP1	peak_0032605	-0.334022	0.808702	-0.520751	0.0338345	0.520751
AKAP1	peak_0032606	0.188549	0.73199	-0.520751	0.0338345	0.520751
AKAP1	peak_0032607	0.183508	0.770928	-0.520751	0.0338345	0.520751
AKAP1	peak_0032608	0.0899558	0.839697	-0.520751	0.0338345	0.520751
AKAP10	peak_0031242	-0.0914029	0.734353	0.00843112	1	0.00843112
AKAP10	peak_0031243	0.164883	0.615493	0.00843112	1	0.00843112
AKAP11	peak_0021043	0.0949933	0.622304	-0.165895	0.972441	0.165895
AKAP11	peak_0021044	-0.426669	0.0349566	-0.165895	0.972441	0.165895
AKAP11	peak_0021045	0.690578	0.467831	-0.165895	0.972441	0.165895
AKAP11	peak_0021046	-0.0777578	0.910145	-0.165895	0.972441	0.165895
AKAP12	peak_0068399	-0.25227	0.204897	-1.16257	0.612153	1.16257
AKAP12	peak_0068400	-0.669598	0.196329	-1.16257	0.612153	1.16257
AKAP12	peak_0068401	0.15766	0.654943	-1.16257	0.612153	1.16257
AKAP12	peak_0068402	0.135216	0.928564	-1.16257	0.612153	1.16257
AKAP12	peak_0068403	0.083882	0.915386	-1.16257	0.612153	1.16257
AKAP12	peak_0068404	0.0163018	0.98356	-1.16257	0.612153	1.16257
AKAP12	peak_0068405	0.130333	0.70827	-1.16257	0.612153	1.16257
AKAP12	peak_0068406	0.0432441	0.971652	-1.16257	0.612153	1.16257
AKAP13	peak_0026878	-0.0803853	0.808151	0.0562329	1	0.0562329
AKAP13	peak_0026879	0.353402	0.188465	0.0562329	1	0.0562329
AKAP13	peak_0026880	0.00945911	0.981592	0.0562329	1	0.0562329
AKAP13	peak_0026881	-0.285892	0.20508	0.0562329	1	0.0562329
AKAP13	peak_0026882	-0.164637	0.65339	0.0562329	1	0.0562329
AKAP13	peak_0026883	-0.667371	0.417146	0.0562329	1	0.0562329
AKAP13	peak_0026884	-0.435221	0.0709567	0.0562329	1	0.0562329
AKAP13	peak_0026885	0.444519	0.476389	0.0562329	1	0.0562329
AKAP13	peak_0026886	0.398407	0.106581	0.0562329	1	0.0562329
AKAP13	peak_0026887	-0.361145	0.271281	0.0562329	1	0.0562329
AKAP13	peak_0026888	-0.174545	0.615493	0.0562329	1	0.0562329
AKAP13	peak_0026889	0.256756	0.730326	0.0562329	1	0.0562329
AKAP13	peak_0026890	-0.159239	0.87279	0.0562329	1	0.0562329
AKAP13	peak_0026891	0.0956244	0.795272	0.0562329	1	0.0562329
AKAP13	peak_0026892	-0.241217	0.578077	0.0562329	1	0.0562329
AKAP13	peak_0026893	0.240281	0.666401	0.0562329	1	0.0562329
AKAP13	peak_0026894	0.416319	0.220472	0.0562329	1	0.0562329
AKAP13	peak_0026895	-0.0946185	0.889572	0.0562329	1	0.0562329
AKAP13	peak_0026896	0.00188094	0.998646	0.0562329	1	0.0562329
AKAP13	peak_0026897	-0.534344	0.69793	0.0562329	1	0.0562329
AKAP13	peak_0026898	-0.112002	0.779924	0.0562329	1	0.0562329
AKAP13	peak_0026899	0.0467412	0.896371	0.0562329	1	0.0562329
AKAP13	peak_0026900	-0.422925	0.197286	0.0562329	1	0.0562329
AKAP13	peak_0026901	-0.0224463	0.983887	0.0562329	1	0.0562329
AKAP13	peak_0026902	-0.482912	0.186719	0.0562329	1	0.0562329
AKAP13	peak_0026903	0.504219	0.328023	0.0562329	1	0.0562329
AKAP13	peak_0026904	-0.403083	0.245073	0.0562329	1	0.0562329
AKAP13	peak_0026905	-0.0358945	0.924266	0.0562329	1	0.0562329
AKAP13	peak_0026906	0.320456	0.362137	0.0562329	1	0.0562329
AKAP13	peak_0026907	0.040076	0.93434	0.0562329	1	0.0562329
AKAP13	peak_0026908	-0.0583511	0.920801	0.0562329	1	0.0562329
AKAP13	peak_0026909	-0.0203192	0.979423	0.0562329	1	0.0562329
AKAP13	peak_0026910	-0.316058	0.48989	0.0562329	1	0.0562329
AKAP13	peak_0026911	-0.841262	0.0168324	0.0562329	1	0.0562329
AKAP13	peak_0026912	-0.0775524	0.941426	0.0562329	1	0.0562329
AKAP13	peak_0026913	-0.764889	0.289222	0.0562329	1	0.0562329
AKAP13	peak_0026914	-0.810119	0.115385	0.0562329	1	0.0562329
AKAP13	peak_0026915	-0.691892	0.00386442	0.0562329	1	0.0562329
AKAP13	peak_0026916	-0.462857	0.103854	0.0562329	1	0.0562329
AKAP14	peak_0082426	-0.379463	0.775451	-0.696607	1	0.696607
AKAP14	peak_0082427	0.196103	0.683931	-0.696607	1	0.696607
AKAP3	peak_0015884	-0.150806	0.829211	-0.14258	1	0.14258
AKAP3	peak_0015885	-0.0457606	0.88142	-0.14258	1	0.14258
AKAP5	peak_0023417	0.0378551	0.967459	-2.35415	2.56556e-09	2.35415
AKAP5	peak_0023418	-0.25521	0.774047	-2.35415	2.56556e-09	2.35415
AKAP5	peak_0023419	0.244349	0.355252	-2.35415	2.56556e-09	2.35415
AKAP5	peak_0023420	-0.589772	0.0108587	-2.35415	2.56556e-09	2.35415
AKAP5	peak_0023421	-0.974304	4.56949e-05	-2.35415	2.56556e-09	2.35415
AKAP5	peak_0023422	-0.196731	0.750542	-2.35415	2.56556e-09	2.35415
AKAP5	peak_0023423	0.00309104	0.993826	-2.35415	2.56556e-09	2.35415
AKAP6	peak_0022710	0.362409	0.864068	0.000786338	1	0.000786338
AKAP6	peak_0022711	-0.263172	0.579067	0.000786338	1	0.000786338
AKAP6	peak_0022712	-0.0139142	0.989012	0.000786338	1	0.000786338
AKAP6	peak_0022713	0.834522	0.0803814	0.000786338	1	0.000786338
AKAP6	peak_0022714	0.700032	0.429735	0.000786338	1	0.000786338
AKAP6	peak_0022715	-0.165866	0.928306	0.000786338	1	0.000786338
AKAP6	peak_0022716	0.762565	0.543599	0.000786338	1	0.000786338
AKAP6	peak_0022717	0.265795	0.79719	0.000786338	1	0.000786338
AKAP7	peak_0067633	0.0927612	0.870657	0.690721	1	0.690721
AKAP7	peak_0067634	0.281049	0.72682	0.690721	1	0.690721
AKAP7	peak_0067635	0.0821282	0.727744	0.690721	1	0.690721
AKAP7	peak_0067636	0.286942	0.795847	0.690721	1	0.690721
AKAP7	peak_0067637	0.241631	0.258323	0.690721	1	0.690721
AKAP7	peak_0067638	0.261015	0.91467	0.690721	1	0.690721
AKAP7	peak_0067639	0.897308	0.00522154	0.690721	1	0.690721
AKAP7	peak_0067640	0.70322	0.000108851	0.690721	1	0.690721
AKAP7	peak_0067641	0.0150533	0.977493	0.690721	1	0.690721
AKAP7	peak_0067642	0.776365	0.160552	0.690721	1	0.690721
AKAP7	peak_0067643	0.4026	0.784031	0.690721	1	0.690721
AKAP7	peak_0067644	0.121555	0.932766	0.690721	1	0.690721
AKAP7	peak_0067645	0.383057	0.667765	0.690721	1	0.690721
AKAP7	peak_0067646	0.352124	0.778833	0.690721	1	0.690721
AKAP8	peak_0037290	-0.340318	0.618109	0.0732397	0.816083	0.0732397
AKAP8	peak_0037291	-0.0957358	0.670407	0.0732397	0.816083	0.0732397
AKAP8	peak_0037292	-0.629437	0.233134	0.0732397	0.816083	0.0732397
AKAP8	peak_0037293	-0.197423	0.696855	0.0732397	0.816083	0.0732397
AKAP8	peak_0037294	-0.243682	0.793941	0.0732397	0.816083	0.0732397
AKAP8L	peak_0037295	-0.053265	0.869219	0.25157	0.428827	0.25157
AKAP9	peak_0071490	-0.00483556	0.990295	0.42581	0.0459421	0.42581
AKAP9	peak_0071491	0.00888909	0.992028	0.42581	0.0459421	0.42581
AKAP9	peak_0071492	-0.799921	0.242241	0.42581	0.0459421	0.42581
AKIP1	peak_0012064	-0.0202298	0.958068	0.122991	1	0.122991
AKIP1	peak_0012065	0.0791024	0.850963	0.122991	1	0.122991
AKIRIN1	peak_0002075	-0.0279949	0.914201	-0.258853	0.260002	0.258853
AKIRIN1	peak_0002076	-0.129734	0.811814	-0.258853	0.260002	0.258853
AKIRIN2	peak_0066682	0.665455	0.331435	0.0147865	1	0.0147865
AKIRIN2	peak_0066683	-0.329009	0.8016	0.0147865	1	0.0147865
AKIRIN2	peak_0066684	-0.114225	0.901012	0.0147865	1	0.0147865
AKIRIN2	peak_0066685	-0.411494	0.228146	0.0147865	1	0.0147865
AKIRIN2	peak_0066686	-0.0229243	0.952755	0.0147865	1	0.0147865
AKIRIN2	peak_0066687	-0.135183	0.65887	0.0147865	1	0.0147865
AKIRIN2	peak_0066688	-0.558741	0.695636	0.0147865	1	0.0147865
AKIRIN2	peak_0066689	-0.215478	0.822284	0.0147865	1	0.0147865
AKIRIN2	peak_0066690	0.0786349	0.852416	0.0147865	1	0.0147865
AKIRIN2	peak_0066691	0.376578	0.246453	0.0147865	1	0.0147865
AKIRIN2	peak_0066692	-0.12006	0.790216	0.0147865	1	0.0147865
AKIRIN2	peak_0066693	0.645158	0.00132957	0.0147865	1	0.0147865
AKNA	peak_0079322	0.293253	0.216549	0.33882	0.108111	0.33882
AKNA	peak_0079323	0.0864328	0.83968	0.33882	0.108111	0.33882
AKNA	peak_0079324	0.158264	0.351242	0.33882	0.108111	0.33882
AKNA	peak_0079325	-0.49617	0.187991	0.33882	0.108111	0.33882
AKNA	peak_0079326	-0.0886567	0.829938	0.33882	0.108111	0.33882
AKNA	peak_0079327	0.0769539	0.791913	0.33882	0.108111	0.33882
AKNA	peak_0079328	-0.183338	0.703317	0.33882	0.108111	0.33882
AKNA	peak_0079329	0.0679494	0.888168	0.33882	0.108111	0.33882
AKNA	peak_0079330	-0.00901155	0.982432	0.33882	0.108111	0.33882
AKNA	peak_0079331	0.0224066	0.954105	0.33882	0.108111	0.33882
AKNAD1	peak_0003852	0.364935	0.43047	1.03733	1	1.03733
AKNAD1	peak_0003853	-0.809144	0.0282026	1.03733	1	1.03733
AKR1A1	peak_0002448	-0.894913	0.000453467	-0.720909	5.01501e-05	0.720909
AKR1A1	peak_0002449	-0.633518	0.0866972	-0.720909	5.01501e-05	0.720909
AKR1A1	peak_0002450	-0.0573924	0.840602	-0.720909	5.01501e-05	0.720909
AKR1B1	peak_0072698	0.0754066	0.789625	-0.217992	0.294897	0.217992
AKR1B1	peak_0072699	-0.0567099	0.886424	-0.217992	0.294897	0.217992
AKR1B10	peak_0072700	1.20777	0.452072	0	1	0
AKR1B10	peak_0072701	0.401077	0.612571	0	1	0
AKR1B15	peak_0072702	0.0504422	0.933684	0	1	0
AKR1C1	peak_0008070	0.833737	0.358497	0	1	0
AKR1D1	peak_0072793	-0.685076	0.520093	0.364894	1	0.364894
AKR1D1	peak_0072794	-0.414176	0.693955	0.364894	1	0.364894
AKR1D1	peak_0072795	0.227097	0.887672	0.364894	1	0.364894
AKR1E2	peak_0008068	1.01754	0.208775	0	1	0
AKR1E2	peak_0008069	-0.259603	0.759496	0	1	0
AKR7A3	peak_0000920	0.489864	0.54661	0.610998	0.64791	0.610998
AKR7A3	peak_0000921	-0.158125	0.642668	0.610998	0.64791	0.610998
AKT1	peak_0024833	-0.0308111	0.951581	0.0862466	1	0.0862466
AKT1	peak_0024834	0.24867	0.270189	0.0862466	1	0.0862466
AKT1	peak_0024835	0.174923	0.676716	0.0862466	1	0.0862466
AKT1S1	peak_0039114	-0.0829971	0.782868	-0.318573	0.0920279	0.318573
AKT2	peak_0038341	0.146778	0.807862	0.00252771	1	0.00252771
AKT2	peak_0038344	-0.423071	0.156115	0.00252771	1	0.00252771
AKT2	peak_0038345	0.0534358	0.831076	0.00252771	1	0.00252771
AKT2	peak_0038346	-0.0702459	0.934963	0.00252771	1	0.00252771
AKT3	peak_0007689	0.108444	0.907856	0.558644	0.517472	0.558644
AKT3	peak_0039564	-0.266418	0.769752	0.558644	0.517472	0.558644
AKTIP	peak_0028998	-0.0414607	0.909119	0.247008	0.0541344	0.247008
AKTIP	peak_0028999	0.106045	0.791562	0.247008	0.0541344	0.247008
AKTIP	peak_0029000	0.24808	0.520285	0.247008	0.0541344	0.247008
AKTIP	peak_0029001	0.289878	0.827361	0.247008	0.0541344	0.247008
AKTIP	peak_0029002	0.548367	0.68809	0.247008	0.0541344	0.247008
ALAD	peak_0079282	-0.0155131	0.966871	0.447254	0.0056288	0.447254
ALAS1	peak_0053033	-0.0696726	0.77536	-0.509024	0.000225274	0.509024
ALB	peak_0058025	-0.968534	0.492824	-1.01163	1	1.01163
ALCAM	peak_0053934	0.0235541	0.963781	-0.114327	1	0.114327
ALCAM	peak_0053935	-0.0625181	0.816052	-0.114327	1	0.114327
ALCAM	peak_0053936	-0.0892716	0.794202	-0.114327	1	0.114327
ALCAM	peak_0053937	1.33872	0.0554032	-0.114327	1	0.114327
ALCAM	peak_0053938	0.729507	0.325239	-0.114327	1	0.114327
ALCAM	peak_0053939	-0.770434	0.137126	-0.114327	1	0.114327
ALCAM	peak_0053940	0.00288467	0.997672	-0.114327	1	0.114327
ALCAM	peak_0053941	0.358454	0.498722	-0.114327	1	0.114327
ALCAM	peak_0053942	0.0137433	0.972796	-0.114327	1	0.114327
ALCAM	peak_0053943	-0.0715288	0.95458	-0.114327	1	0.114327
ALCAM	peak_0053944	-0.255827	0.866282	-0.114327	1	0.114327
ALCAM	peak_0053945	0.374475	0.819214	-0.114327	1	0.114327
ALCAM	peak_0053946	-0.0220574	0.933627	-0.114327	1	0.114327
ALCAM	peak_0053947	-0.0877872	0.695373	-0.114327	1	0.114327
ALCAM	peak_0053948	-0.0162383	0.990703	-0.114327	1	0.114327
ALCAM	peak_0053949	-0.174352	0.791935	-0.114327	1	0.114327
ALDH16A1	peak_0039061	-0.129372	0.60986	0.0821265	1	0.0821265
ALDH18A1	peak_0010522	0.184207	0.27498	-0.464604	0.0337981	0.464604
ALDH18A1	peak_0010523	0.821549	0.60487	-0.464604	0.0337981	0.464604
ALDH1A1	peak_0078166	-0.23096	0.910485	0	1	0
ALDH1A2	peak_0025749	0.2049	0.8989	-2.36403	1	2.36403
ALDH1A3	peak_0027311	0.0434963	0.955397	-0.0213542	1	0.0213542
ALDH1B1	peak_0077930	-0.642375	0.0256465	-0.836861	0.0538376	0.836861
ALDH1B1	peak_0077931	0.119427	0.884417	-0.836861	0.0538376	0.836861
ALDH1B1	peak_0077932	0.387099	0.603412	-0.836861	0.0538376	0.836861
ALDH1B1	peak_0077933	0.0290403	0.924087	-0.836861	0.0538376	0.836861
ALDH1L1-AS2	peak_0054623	0.841826	0.364948	0	1	0
ALDH1L2	peak_0019076	0.331452	0.766836	-0.0687995	1	0.0687995
ALDH1L2	peak_0019077	-0.416135	0.293224	-0.0687995	1	0.0687995
ALDH1L2	peak_0019078	-1.5147	0.134825	-0.0687995	1	0.0687995
ALDH1L2	peak_0019079	-0.294557	0.716	-0.0687995	1	0.0687995
ALDH1L2	peak_0019080	-0.0115084	0.983809	-0.0687995	1	0.0687995
ALDH1L2	peak_0019081	0.412586	0.592264	-0.0687995	1	0.0687995
ALDH2	peak_0019382	0.0683803	0.932502	0.26018	1	0.26018
ALDH2	peak_0019383	0.208902	0.575047	0.26018	1	0.26018
ALDH2	peak_0019384	0.184458	0.80126	0.26018	1	0.26018
ALDH2	peak_0019385	0.00712313	0.991617	0.26018	1	0.26018
ALDH2	peak_0019386	0.0358572	0.928328	0.26018	1	0.26018
ALDH2	peak_0019387	-0.298143	0.410481	0.26018	1	0.26018
ALDH2	peak_0019388	-0.122427	0.606247	0.26018	1	0.26018
ALDH3A1	peak_0031234	-0.0195548	0.948078	-0.62459	1	0.62459
ALDH3A1	peak_0031235	-0.0812611	0.910145	-0.62459	1	0.62459
ALDH3A1	peak_0031236	-0.800036	2.49006e-05	-0.62459	1	0.62459
ALDH3A1	peak_0031237	-0.755524	0.0134236	-0.62459	1	0.62459
ALDH3A1	peak_0031238	-0.449871	0.0433222	-0.62459	1	0.62459
ALDH3A1	peak_0031239	0.00473173	0.991867	-0.62459	1	0.62459
ALDH3A2	peak_0031223	0.0122801	0.970976	0.0990547	1	0.0990547
ALDH3A2	peak_0031224	0.441027	0.716776	0.0990547	1	0.0990547
ALDH3A2	peak_0031225	0.304119	0.720987	0.0990547	1	0.0990547
ALDH3A2	peak_0031226	-0.781542	0.275717	0.0990547	1	0.0990547
ALDH3A2	peak_0031227	0.358656	0.7776	0.0990547	1	0.0990547
ALDH3A2	peak_0031228	-0.0490551	0.917133	0.0990547	1	0.0990547
ALDH3A2	peak_0031229	0.142746	0.910474	0.0990547	1	0.0990547
ALDH3B1	peak_0013745	0.408825	0.0110724	-0.631193	0.687645	0.631193
ALDH3B1	peak_0013746	0.13308	0.722787	-0.631193	0.687645	0.631193
ALDH3B2	peak_0013729	0.288834	0.275584	1.54624	1	1.54624
ALDH3B2	peak_0013730	0.189345	0.858947	1.54624	1	1.54624
ALDH3B2	peak_0013731	0.211931	0.526229	1.54624	1	1.54624
ALDH3B2	peak_0013732	0.514614	0.110035	1.54624	1	1.54624
ALDH3B2	peak_0013733	-0.687659	0.0862925	1.54624	1	1.54624
ALDH4A1	peak_0000902	-0.0599953	0.838508	0.011692	1	0.011692
ALDH4A1	peak_0000903	0.00804704	0.990652	0.011692	1	0.011692
ALDH4A1	peak_0000904	0.448985	0.505293	0.011692	1	0.011692
ALDH4A1	peak_0000905	0.00282182	0.995607	0.011692	1	0.011692
ALDH4A1	peak_0000906	0.185349	0.311532	0.011692	1	0.011692
ALDH5A1	peak_0065222	-0.245452	0.358534	0.15008	1	0.15008
ALDH5A1	peak_0065223	0.638357	0.0769684	0.15008	1	0.15008
ALDH5A1	peak_0065224	-0.058453	0.873156	0.15008	1	0.15008
ALDH5A1	peak_0065225	-0.287706	0.204127	0.15008	1	0.15008
ALDH5A1	peak_0065226	0.267148	0.246362	0.15008	1	0.15008
ALDH5A1	peak_0065227	0.229648	0.843563	0.15008	1	0.15008
ALDH6A1	peak_0023917	-0.0193249	0.958592	0.265608	0.584475	0.265608
ALDH7A1	peak_0062417	0.401619	0.539839	0.834504	1	0.834504
ALDH7A1	peak_0062418	0.251712	0.348391	0.834504	1	0.834504
ALDH8A1	peak_0067744	0.682846	0.430832	0.0566812	1	0.0566812
ALDH8A1	peak_0067745	-0.0707101	0.958469	0.0566812	1	0.0566812
ALDH8A1	peak_0067746	0.780613	0.332064	0.0566812	1	0.0566812
ALDH8A1	peak_0067747	-0.859285	0.0422045	0.0566812	1	0.0566812
ALDH9A1	peak_0005370	0.479262	0.0443386	0.138551	0.87904	0.138551
ALDH9A1	peak_0005371	0.00774535	0.982903	0.138551	0.87904	0.138551
ALDOA	peak_0028641	-0.0329504	0.924084	-0.317063	0.944067	0.317063
ALDOA	peak_0028642	-0.129141	0.587539	-0.317063	0.944067	0.317063
ALDOB	peak_0078966	0.270063	0.746501	0.896858	0.237253	0.896858
ALDOB	peak_0078967	-0.0417451	0.931335	0.896858	0.237253	0.896858
ALDOC	peak_0031413	-0.0554293	0.864007	0.178066	1	0.178066
ALG1	peak_0027747	-0.003673	0.99246	-0.448147	0.0286604	0.448147
ALG10	peak_0016915	-0.0608176	0.829175	0.0330827	1	0.0330827
ALG10	peak_0016916	0.533064	0.672618	0.0330827	1	0.0330827
ALG10	peak_0016917	-0.143831	0.908913	0.0330827	1	0.0330827
ALG10	peak_0016918	0.756071	0.501208	0.0330827	1	0.0330827
ALG10	peak_0016919	0.712827	0.40697	0.0330827	1	0.0330827
ALG10	peak_0016920	0.498779	0.610121	0.0330827	1	0.0330827
ALG10	peak_0016921	0.316545	0.609425	0.0330827	1	0.0330827
ALG10	peak_0016922	0.385504	0.790495	0.0330827	1	0.0330827
ALG10	peak_0016923	0.231075	0.846656	0.0330827	1	0.0330827
ALG10	peak_0016924	0.954139	0.191688	0.0330827	1	0.0330827
ALG10B	peak_0016925	2.06591	0.111659	0.156664	1	0.156664
ALG10B	peak_0016926	0.58783	0.450766	0.156664	1	0.156664
ALG10B	peak_0016927	0.769594	0.468724	0.156664	1	0.156664
ALG10B	peak_0016928	-0.509098	0.679337	0.156664	1	0.156664
ALG10B	peak_0016929	0.562905	0.663619	0.156664	1	0.156664
ALG10B	peak_0016930	0.608215	0.46984	0.156664	1	0.156664
ALG10B	peak_0016931	0.626832	0.571884	0.156664	1	0.156664
ALG10B	peak_0016932	-0.0523532	0.867354	0.156664	1	0.156664
ALG10B	peak_0016933	-0.0824974	0.933696	0.156664	1	0.156664
ALG10B	peak_0016934	0.221395	0.87279	0.156664	1	0.156664
ALG10B	peak_0016935	0.689666	0.440275	0.156664	1	0.156664
ALG11	peak_0021427	-0.0148733	0.963515	0.0796864	1	0.0796864
ALG12	peak_0051155	-0.136919	0.611067	0.394355	0.00784797	0.394355
ALG13	peak_0082297	-0.108566	0.73411	-0.00511343	1	0.00511343
ALG14	peak_0003579	-0.0304166	0.939662	-0.381817	0.424793	0.381817
ALG1L	peak_0054616	0.752443	0.469266	-0.607486	0.649436	0.607486
ALG1L9P	peak_0013889	-0.229327	0.243744	-1.51772	0.000969627	1.51772
ALG2	peak_0078894	0.23218	0.768777	-0.0673386	1	0.0673386
ALG2	peak_0078895	-0.1208	0.916938	-0.0673386	1	0.0673386
ALG2	peak_0078896	-1.14335	0.000296305	-0.0673386	1	0.0673386
ALG2	peak_0078897	-0.476883	0.0054788	-0.0673386	1	0.0673386
ALG2	peak_0078898	-0.160141	0.792212	-0.0673386	1	0.0673386
ALG2	peak_0078899	0.410359	0.784031	-0.0673386	1	0.0673386
ALG2	peak_0078900	0.6576	0.489934	-0.0673386	1	0.0673386
ALG2	peak_0078901	0.0600159	0.963368	-0.0673386	1	0.0673386
ALG2	peak_0078902	-0.00694611	0.98386	-0.0673386	1	0.0673386
ALG5	peak_0020865	0.139835	0.860356	-0.304571	0.222959	0.304571
ALG5	peak_0020866	-0.0802109	0.763039	-0.304571	0.222959	0.304571
ALG6	peak_0002830	-0.0997012	0.665373	0.124516	0.788702	0.124516
ALG6	peak_0002831	0.188576	0.627344	0.124516	0.788702	0.124516
ALG8	peak_0014221	0.0372105	0.960789	-0.675496	2.66228e-05	0.675496
ALG8	peak_0014222	-0.190281	0.308135	-0.675496	2.66228e-05	0.675496
ALG9	peak_0014905	-0.152549	0.79567	-0.0351434	1	0.0351434
ALG9	peak_0014906	-0.0550501	0.823737	-0.0351434	1	0.0351434
ALK	peak_0040393	1.27099	0.0208844	0	1	0
ALK	peak_0040394	0.144624	0.90464	0	1	0
ALK	peak_0040395	-0.43327	0.418738	0	1	0
ALK	peak_0040396	0.115033	0.933274	0	1	0
ALKAL2	peak_0039574	0.353097	0.544808	0.842829	0.873433	0.842829
ALKBH1	peak_0024122	-0.166741	0.347112	-0.00183177	1	0.00183177
ALKBH2	peak_0019220	-0.301882	0.0822635	-0.916004	0.00121016	0.916004
ALKBH3	peak_0012703	1.11621	0.401845	-0.533332	0.483842	0.533332
ALKBH3	peak_0012704	-0.867135	0.0295119	-0.533332	0.483842	0.533332
ALKBH3	peak_0012705	-0.122066	0.692662	-0.533332	0.483842	0.533332
ALKBH4	peak_0071891	0.0379956	0.920112	0.834811	0.00871038	0.834811
ALKBH4	peak_0071892	0.58957	0.0530774	0.834811	0.00871038	0.834811
ALKBH5	peak_0031156	0.252406	0.154613	0.157681	0.669766	0.157681
ALKBH5	peak_0031157	0.0532917	0.855579	0.157681	0.669766	0.157681
ALKBH5	peak_0031158	0.11376	0.869308	0.157681	0.669766	0.157681
ALKBH5	peak_0031159	-0.0888394	0.751333	0.157681	0.669766	0.157681
ALKBH5	peak_0031160	-0.196942	0.898353	0.157681	0.669766	0.157681
ALKBH7	peak_0036581	-0.0224695	0.9514	0.29357	0.54578	0.29357
ALKBH8	peak_0014768	-0.146668	0.59809	-0.423808	0.294878	0.423808
ALKBH8	peak_0014769	0.238672	0.574455	-0.423808	0.294878	0.423808
ALLC	peak_0039635	-0.0961746	0.79594	0	1	0
ALLC	peak_0039636	-0.01215	0.973603	0	1	0
ALLC	peak_0039637	0.724865	0.194734	0	1	0
ALLC	peak_0039638	0.432854	0.481781	0	1	0
ALMS1	peak_0041799	-0.0345135	0.93566	-0.0209516	1	0.0209516
ALMS1-IT1	peak_0041800	0.00198839	0.997714	0.0266834	1	0.0266834
ALOX12	peak_0030738	0.700507	0.388611	0.279183	0.780856	0.279183
ALOX12-AS1	peak_0030739	-0.162956	0.696824	0.162835	1	0.162835
ALOX12B	peak_0030850	-0.0718016	0.828554	0.179072	1	0.179072
ALOX12B	peak_0030851	-0.0172221	0.957941	0.179072	1	0.179072
ALOX12P2	peak_0030729	0.272618	0.796298	-0.918732	0.792084	0.918732
ALOX12P2	peak_0030730	-0.162398	0.948897	-0.918732	0.792084	0.918732
ALOX12P2	peak_0030731	-0.0791545	0.956418	-0.918732	0.792084	0.918732
ALOX12P2	peak_0030732	-0.152663	0.849922	-0.918732	0.792084	0.918732
ALOX12P2	peak_0030733	-0.193615	0.798246	-0.918732	0.792084	0.918732
ALOX12P2	peak_0030734	0.13251	0.933555	-0.918732	0.792084	0.918732
ALOX12P2	peak_0030735	-0.247106	0.742759	-0.918732	0.792084	0.918732
ALOX12P2	peak_0030736	0.0496468	0.916678	-0.918732	0.792084	0.918732
ALOX12P2	peak_0030737	-0.325131	0.0655629	-0.918732	0.792084	0.918732
ALOX15	peak_0030620	-0.229631	0.69688	0.763685	1	0.763685
ALOX15	peak_0030621	0.0319958	0.944015	0.763685	1	0.763685
ALOX15	peak_0030622	-0.385233	0.377157	0.763685	1	0.763685
ALOX15	peak_0030623	-0.42603	0.603005	0.763685	1	0.763685
ALOX15B	peak_0030846	0.136357	0.907833	-0.476315	1	0.476315
ALOX15B	peak_0030847	-0.12581	0.735154	-0.476315	1	0.476315
ALOX15B	peak_0030848	-0.167232	0.642647	-0.476315	1	0.476315
ALOX15B	peak_0030849	-0.757121	0.0785424	-0.476315	1	0.476315
ALOX15P1	peak_0030721	0.18556	0.578291	0.991966	0.00174807	0.991966
ALOX15P1	peak_0030722	-0.232721	0.355046	0.991966	0.00174807	0.991966
ALOX15P1	peak_0030723	-0.148602	0.794134	0.991966	0.00174807	0.991966
ALOX5	peak_0009145	1.24913	8.30741e-05	1.11699	0.908564	1.11699
ALOX5	peak_0011723	0.985399	0.941796	1.11699	0.908564	1.11699
ALOX5AP	peak_0020721	0.0149774	0.965478	0.11919	1	0.11919
ALOX5AP	peak_0020722	0.117538	0.760187	0.11919	1	0.11919
[truncated: 69,064 more rows]
