# Supplementary material
Source: Research Square preprint supplement (doi:10.21203/rs.3.rs-9485118/v1)
Supplement: Supplementary file 3 [file a8575ace8d47b3d7655bfcf0.xlsx]

## Sheet: Both_vs_antiIGM
baseMean	log2FoldChange	lfcSE	stat	pvalue	padj	peakID
114.621	-2.57223	0.233249	-11.0279	2.8049e-28	2.32907e-23	peak_0045848
89.5605	-2.15224	0.211181	-10.1915	2.16466e-24	8.98724e-20	peak_0075420
136.487	-1.5934	0.171414	-9.29562	1.46345e-20	4.05062e-16	peak_0032399
877.097	-1.13621	0.130381	-8.71456	2.91901e-18	6.05958e-14	peak_0032716
128.722	-1.88882	0.219746	-8.59548	8.29166e-18	1.37701e-13	peak_0019483
1048.06	-0.832135	0.0973991	-8.54356	1.30148e-17	1.62817e-13	peak_0045197
375.425	-1.13268	0.132673	-8.53742	1.37256e-17	1.62817e-13	peak_0055681
443.562	-1.11188	0.131233	-8.47255	2.40087e-17	2.49198e-13	peak_0068537
60.6369	-1.73634	0.206044	-8.42705	3.54479e-17	3.27051e-13	peak_0002868
241.653	-1.33274	0.160786	-8.28891	1.14289e-16	8.62645e-13	peak_0010298
339.155	-1.29561	0.156502	-8.27857	1.24666e-16	8.62645e-13	peak_0019690
122.092	-2.06796	0.249468	-8.28948	1.13745e-16	8.62645e-13	peak_0070826
297.301	-0.995646	0.121839	-8.17179	3.03858e-16	1.94086e-12	peak_0051543
163.344	-1.88942	0.235237	-8.03202	9.5884e-16	5.68702e-12	peak_0024349
466.558	-1.19662	0.149487	-8.00484	1.19622e-15	6.62195e-12	peak_0073025
157.688	-1.78018	0.223142	-7.97779	1.48977e-15	7.73151e-12	peak_0048849
695.52	-1.21238	0.152419	-7.95424	1.80237e-15	8.80363e-12	peak_0015488
78.8307	-1.92208	0.24483	-7.85066	4.13847e-15	1.86516e-11	peak_0030418
120.305	-1.29609	0.165175	-7.8468	4.26779e-15	1.86516e-11	peak_0034755
118.699	-1.7012	0.217311	-7.82841	4.94086e-15	2.05135e-11	peak_0001248
154.384	-1.36174	0.174996	-7.78152	7.16584e-15	2.83344e-11	peak_0043423
161.467	-1.32215	0.170362	-7.76081	8.43916e-15	3.18525e-11	peak_0039191
216.502	-1.40796	0.182303	-7.72315	1.13489e-14	4.09724e-11	peak_0040416
96.4042	-1.3635	0.176794	-7.71234	1.23531e-14	4.27397e-11	peak_0072993
155.473	-1.56427	0.203527	-7.68578	1.52063e-14	5.05068e-11	peak_0058727
159.301	-1.47906	0.192875	-7.66848	1.74041e-14	5.55832e-11	peak_0051358
103.692	-1.68587	0.220823	-7.63446	2.26762e-14	6.97387e-11	peak_0016457
156.753	-1.71722	0.226413	-7.58445	3.33907e-14	9.52667e-11	peak_0002389
133.396	-1.53284	0.202322	-7.57626	3.55661e-14	9.52667e-11	peak_0038986
262.653	-1.25782	0.16584	-7.58455	3.33649e-14	9.52667e-11	peak_0040423
253.244	-0.873107	0.115215	-7.57808	3.50705e-14	9.52667e-11	peak_0047376
218.018	-1.39686	0.184984	-7.55121	4.31243e-14	1.08511e-10	peak_0008262
109.939	-1.28206	0.169708	-7.55447	4.20555e-14	1.08511e-10	peak_0052149
49.6787	-2.19081	0.29066	-7.53737	4.79549e-14	1.14673e-10	peak_0012918
197.519	-1.44034	0.19112	-7.53634	4.83352e-14	1.14673e-10	peak_0022878
411.909	-1.18216	0.157021	-7.52872	5.12391e-14	1.18186e-10	peak_0002244
218.44	-1.53245	0.203825	-7.51844	5.54327e-14	1.24403e-10	peak_0066806
259.043	0.889885	0.118783	7.4917	6.79854e-14	1.48559e-10	peak_0009723
51.6143	-1.51932	0.203149	-7.47884	7.49808e-14	1.59644e-10	peak_0001586
165.042	-1.37331	0.184571	-7.44054	1.00278e-13	2.08167e-10	peak_0075421
49.3814	-2.1697	0.291912	-7.43272	1.06385e-13	2.15458e-10	peak_0081435
131.893	-1.14316	0.154004	-7.42292	1.14567e-13	2.26504e-10	peak_0070092
152.381	-1.25054	0.169506	-7.37753	1.61248e-13	3.11381e-10	peak_0042805
429.5	-0.991371	0.134458	-7.37311	1.66693e-13	3.14579e-10	peak_0057625
519.786	-1.17896	0.160563	-7.34267	2.09368e-13	3.86335e-10	peak_0000768
104.003	-1.6198	0.224421	-7.21768	5.28831e-13	9.54608e-10	peak_0078909
145.643	-1.34081	0.186078	-7.20563	5.77755e-13	1.02073e-09	peak_0002562
271.148	-1.47839	0.205676	-7.18795	6.57732e-13	1.13782e-09	peak_0032634
147.343	-1.41219	0.1968	-7.17576	7.19081e-13	1.21856e-09	peak_0066660
107.729	-1.26468	0.176942	-7.14741	8.84294e-13	1.46856e-09	peak_0022824
242.057	-0.816094	0.114666	-7.11716	1.10172e-12	1.79377e-09	peak_0051423
105.949	-1.63453	0.230161	-7.10171	1.23227e-12	1.96774e-09	peak_0046584
119.967	-1.80118	0.253797	-7.09693	1.27561e-12	1.99851e-09	peak_0055969
126.678	-1.50016	0.211628	-7.08866	1.3542e-12	2.08236e-09	peak_0004997
182.743	-1.19277	0.168693	-7.07067	1.54189e-12	2.32786e-09	peak_0001655
72.5045	-1.64997	0.233533	-7.06528	1.60293e-12	2.3768e-09	peak_0044920
252.966	-0.863704	0.122347	-7.05946	1.67146e-12	2.39295e-09	peak_0033725
267.127	-0.886931	0.125634	-7.05963	1.66941e-12	2.39295e-09	peak_0050670
356.356	-1.15876	0.164279	-7.05361	1.7434e-12	2.45364e-09	peak_0070540
37.8441	-2.03613	0.289021	-7.04492	1.85571e-12	2.56817e-09	peak_0003439
51.3439	-1.5446	0.219882	-7.02465	2.14598e-12	2.92121e-09	peak_0064262
133.697	-1.50726	0.214941	-7.01244	2.34189e-12	3.08669e-09	peak_0003457
178.864	-1.13964	0.16248	-7.01405	2.3152e-12	3.08669e-09	peak_0019917
250.978	-0.956409	0.136536	-7.0048	2.47332e-12	3.20898e-09	peak_0006173
27.3649	-2.95716	0.424066	-6.97335	3.09487e-12	3.95362e-09	peak_0032793
47.6505	-1.80797	0.25937	-6.97064	3.15492e-12	3.96928e-09	peak_0006536
42.5949	-2.40629	0.346091	-6.95276	3.58198e-12	4.4393e-09	peak_0042810
83.0837	-1.78452	0.257892	-6.91965	4.52768e-12	5.52883e-09	peak_0078327
200.88	-1.12409	0.162728	-6.90778	4.92295e-12	5.83974e-09	peak_0035189
308.03	-1.24422	0.180118	-6.90779	4.92277e-12	5.83974e-09	peak_0042806
168.617	-1.32627	0.192174	-6.90141	5.14882e-12	6.02165e-09	peak_0054361
201.087	-1.35821	0.197134	-6.88976	5.58848e-12	6.44507e-09	peak_0034469
92.153	-1.28602	0.188057	-6.83847	8.00408e-12	9.04538e-09	peak_0021889
81.9163	-1.4649	0.214247	-6.83746	8.06106e-12	9.04538e-09	peak_0065786
77.2069	-1.42893	0.209193	-6.83067	8.45176e-12	9.23421e-09	peak_0024422
93.7907	-1.15151	0.168563	-6.83134	8.41231e-12	9.23421e-09	peak_0033651
93.5385	-1.18645	0.173769	-6.82774	8.62627e-12	9.30248e-09	peak_0072215
151.317	-1.47788	0.21721	-6.8039	1.01825e-11	1.08399e-08	peak_0075027
223.344	-0.88392	0.129999	-6.79945	1.05016e-11	1.10381e-08	peak_0061018
46.544	-1.6722	0.246131	-6.79396	1.09098e-11	1.13239e-08	peak_0071457
145.575	-1.11657	0.164769	-6.77657	1.23062e-11	1.26156e-08	peak_0042553
91.4896	-1.4991	0.221412	-6.77064	1.28217e-11	1.29837e-08	peak_0002344
130.749	-1.55948	0.230401	-6.76854	1.3009e-11	1.30146e-08	peak_0028677
188.922	-0.891462	0.1319	-6.75863	1.39304e-11	1.37705e-08	peak_0028108
171.989	-1.25832	0.186352	-6.75237	1.45452e-11	1.42091e-08	peak_0057162
85.6631	-1.28056	0.189912	-6.74288	1.55276e-11	1.48853e-08	peak_0011237
94.47	-1.65583	0.245651	-6.74058	1.57752e-11	1.48853e-08	peak_0045672
432.838	1.15805	0.171794	6.74092	1.57384e-11	1.48853e-08	peak_0054229
223.61	-1.26504	0.187859	-6.73401	1.65053e-11	1.53993e-08	peak_0048147
89.2163	-1.95332	0.290737	-6.71851	1.83594e-11	1.69388e-08	peak_0010375
46.0607	-1.6279	0.242667	-6.70838	1.96798e-11	1.79575e-08	peak_0026553
57.8554	-1.81384	0.270663	-6.70149	2.06302e-11	1.86201e-08	peak_0023167
203.338	-0.947022	0.141404	-6.69727	2.12345e-11	1.89595e-08	peak_0019927
81.3765	-1.83368	0.274379	-6.683	2.34104e-11	2.06798e-08	peak_0004213
102.114	-1.55717	0.233436	-6.67066	2.54647e-11	2.22578e-08	peak_0021143
97.4565	-1.67156	0.250648	-6.66894	2.57664e-11	2.22869e-08	peak_0068703
505.43	-1.05616	0.158444	-6.66587	2.63097e-11	2.25222e-08	peak_0047617
178.247	-1.54551	0.232354	-6.65152	2.90075e-11	2.45782e-08	peak_0032443
60.5875	-1.93313	0.290756	-6.64866	2.95782e-11	2.48086e-08	peak_0026728
166.525	-1.11567	0.168101	-6.63691	3.20317e-11	2.65979e-08	peak_0032588
319.46	-1.27656	0.192678	-6.62535	3.4643e-11	2.84814e-08	peak_0034924
491.179	-1.15723	0.175178	-6.60603	3.94759e-11	3.21364e-08	peak_0050750
497.04	-1.07456	0.162913	-6.59593	4.22608e-11	3.39603e-08	peak_0002090
139.345	-1.36365	0.206771	-6.59497	4.25342e-11	3.39603e-08	peak_0069825
181.451	-1.30056	0.19734	-6.59045	4.38484e-11	3.46762e-08	peak_0049647
59.3198	-1.49722	0.227248	-6.58848	4.44339e-11	3.48077e-08	peak_0036965
238.33	-1.02175	0.155266	-6.58065	4.68405e-11	3.635e-08	peak_0047834
269.958	-1.28543	0.195973	-6.55921	5.40946e-11	4.15907e-08	peak_0037024
509.515	-1.61152	0.245819	-6.55572	5.53739e-11	4.21838e-08	peak_0026230
77.7807	-1.30059	0.199021	-6.53492	6.36449e-11	4.80438e-08	peak_0035285
158.235	-1.3473	0.206401	-6.52758	6.68408e-11	5.00017e-08	peak_0048806
264.93	-1.22829	0.188609	-6.51237	7.39749e-11	5.48445e-08	peak_0032397
193.291	-1.32399	0.203387	-6.50969	7.53041e-11	5.50747e-08	peak_0003716
38.8804	-1.86437	0.286426	-6.50908	7.5612e-11	5.50747e-08	peak_0041612
106.095	-1.22546	0.188589	-6.49801	8.1387e-11	5.8259e-08	peak_0017481
381.367	-0.949518	0.146105	-6.49887	8.09238e-11	5.8259e-08	peak_0050160
39.9794	-2.03893	0.31389	-6.49568	8.26588e-11	5.86638e-08	peak_0071257
135.035	-0.942303	0.145167	-6.49114	8.51878e-11	5.99462e-08	peak_0011771
174.798	-1.15702	0.17891	-6.46706	9.9927e-11	6.91462e-08	peak_0014705
100.23	-0.961985	0.148731	-6.46797	9.93313e-11	6.91462e-08	peak_0056145
262.962	-0.88535	0.13702	-6.46144	1.03709e-10	7.05867e-08	peak_0001487
130.622	-0.879199	0.136061	-6.46182	1.03451e-10	7.05867e-08	peak_0061784
423.851	-1.55533	0.241084	-6.45139	1.10831e-10	7.48208e-08	peak_0066267
157.265	1.158	0.179538	6.44988	1.11936e-10	7.49573e-08	peak_0045708
349.268	-0.73103	0.113366	-6.44837	1.13057e-10	7.51022e-08	peak_0023596
95.5249	-1.73696	0.269416	-6.44713	1.13986e-10	7.51183e-08	peak_0048593
90.7384	-1.41382	0.219689	-6.43556	1.23017e-10	8.0432e-08	peak_0076574
194.572	-1.41719	0.221193	-6.40704	1.48376e-10	9.62542e-08	peak_0032327
283.892	-0.926987	0.144784	-6.40256	1.52791e-10	9.83497e-08	peak_0026684
117.962	-1.19722	0.187033	-6.40113	1.54235e-10	9.85158e-08	peak_0008597
526.564	-1.08452	0.169604	-6.39445	1.61127e-10	1.02132e-07	peak_0064655
47.9206	-2.42442	0.379408	-6.39001	1.65879e-10	1.04348e-07	peak_0081497
36.0817	-2.02539	0.317052	-6.3882	1.67852e-10	1.04795e-07	peak_0058169
40.9217	-1.51731	0.237615	-6.38559	1.7074e-10	1.05803e-07	peak_0055236
278.41	-1.0826	0.169711	-6.37907	1.78171e-10	1.09227e-07	peak_0023522
124.31	-1.48226	0.232386	-6.37844	1.78897e-10	1.09227e-07	peak_0026228
194.761	-1.3326	0.209453	-6.36227	1.98797e-10	1.19618e-07	peak_0030071
47.3709	-2.30467	0.362205	-6.36288	1.98005e-10	1.19618e-07	peak_0048598
121.48	-1.05318	0.165858	-6.34992	2.15425e-10	1.28691e-07	peak_0040250
233.125	-0.986012	0.155315	-6.34848	2.17459e-10	1.28978e-07	peak_0023568
411.552	-0.97427	0.153634	-6.34149	2.27548e-10	1.34005e-07	peak_0004223
105.116	-1.73974	0.274409	-6.33994	2.29851e-10	1.34408e-07	peak_0039924
190.693	-0.884344	0.139574	-6.33602	2.3578e-10	1.36911e-07	peak_0010388
327.043	-1.30935	0.206762	-6.33267	2.40961e-10	1.38947e-07	peak_0026221
72.2007	-2.07569	0.328104	-6.32633	2.51068e-10	1.43777e-07	peak_0030655
64.5909	-1.27488	0.202364	-6.29995	2.97749e-10	1.6819e-07	peak_0019334
282.103	-1.32811	0.210786	-6.30074	2.9622e-10	1.6819e-07	peak_0068495
596.34	-1.11764	0.177452	-6.29827	3.00988e-10	1.6887e-07	peak_0053795
94.0157	-1.57594	0.250453	-6.29234	3.12721e-10	1.73662e-07	peak_0007504
163.235	-1.50129	0.238609	-6.29185	3.1371e-10	1.73662e-07	peak_0011625
112.968	-1.69752	0.269885	-6.28978	3.17913e-10	1.74823e-07	peak_0000764
272.36	-0.851895	0.135655	-6.27988	3.38845e-10	1.85108e-07	peak_0078468
480.433	-1.08084	0.172473	-6.2667	3.68787e-10	2.00148e-07	peak_0033171
39.4826	-1.62642	0.259746	-6.26157	3.81117e-10	2.05496e-07	peak_0035214
225.659	0.860018	0.137406	6.25898	3.87511e-10	2.07596e-07	peak_0047939
332.152	-0.80075	0.127972	-6.25723	3.91871e-10	2.08093e-07	peak_0000772
763.683	1.02601	0.163989	6.2566	3.93451e-10	2.08093e-07	peak_0071909
148.568	-1.5122	0.242131	-6.24539	4.22731e-10	2.21102e-07	peak_0014576
141.09	-1.39839	0.223916	-6.24516	4.23374e-10	2.21102e-07	peak_0065099
183.239	0.779796	0.125154	6.23069	4.64374e-10	2.40999e-07	peak_0069039
211.215	-2.02323	0.324822	-6.22873	4.7022e-10	2.42517e-07	peak_0037242
405.074	-1.21889	0.195976	-6.21961	4.984e-10	2.53975e-07	peak_0006354
69.4494	-1.28936	0.207307	-6.21956	4.98554e-10	2.53975e-07	peak_0048483
160.393	-1.10962	0.178449	-6.21813	5.03114e-10	2.54735e-07	peak_0077451
330.793	-0.737424	0.118641	-6.2156	5.11289e-10	2.57305e-07	peak_0080867
209.535	-1.21474	0.19561	-6.21	5.29851e-10	2.6504e-07	peak_0006593
53.4864	-1.40721	0.22666	-6.20848	5.35005e-10	2.66016e-07	peak_0030259
65.5276	-1.41537	0.22824	-6.20123	5.60236e-10	2.76903e-07	peak_0001679
63.3116	-2.00839	0.323958	-6.19954	5.66271e-10	2.77424e-07	peak_0005179
97.3953	-1.26737	0.204445	-6.19907	5.67971e-10	2.77424e-07	peak_0051865
302.71	-1.08855	0.175649	-6.19731	5.74345e-10	2.78897e-07	peak_0055683
141.736	-1.2742	0.205766	-6.19246	5.92308e-10	2.85947e-07	peak_0017211
503.061	-0.738837	0.119463	-6.18466	6.22347e-10	2.98712e-07	peak_0052761
151.47	-1.10194	0.178214	-6.18327	6.27861e-10	2.99627e-07	peak_0058779
229.526	-0.800156	0.129867	-6.16136	7.21228e-10	3.42217e-07	peak_0068048
415.048	-0.879797	0.143009	-6.15202	7.65045e-10	3.60945e-07	peak_0038481
222.162	-1.05717	0.171869	-6.15102	7.69839e-10	3.61155e-07	peak_0001422
552.929	0.771485	0.125626	6.14112	8.1943e-10	3.78012e-07	peak_0015177
370.633	0.786726	0.128106	6.14122	8.18882e-10	3.78012e-07	peak_0040797
29.4445	-1.69043	0.275251	-6.1414	8.17955e-10	3.78012e-07	peak_0072778
70.7343	-1.81294	0.29538	-6.13766	8.37471e-10	3.842e-07	peak_0013709
230.646	0.672021	0.109886	6.11561	9.61869e-10	4.38845e-07	peak_0078637
59.3273	-1.11199	0.182037	-6.10857	1.00526e-09	4.51206e-07	peak_0004040
51.271	-1.39209	0.227834	-6.11012	9.95588e-10	4.51206e-07	peak_0040179
159.645	-1.07365	0.175745	-6.1091	1.00196e-09	4.51206e-07	peak_0059209
116.361	-1.08336	0.17753	-6.1024	1.04487e-09	4.66462e-07	peak_0057527
133.973	-1.12092	0.183798	-6.09868	1.0695e-09	4.74902e-07	peak_0060387
106.482	-1.1796	0.193472	-6.097	1.08081e-09	4.77371e-07	peak_0047345
252.283	-0.868632	0.142587	-6.09194	1.11552e-09	4.90095e-07	peak_0047866
125.172	-1.30888	0.215446	-6.07524	1.23805e-09	5.41068e-07	peak_0034961
82.8743	-1.69325	0.278805	-6.07322	1.25368e-09	5.4219e-07	peak_0008131
403.099	-1.04504	0.172061	-6.07368	1.25011e-09	5.4219e-07	peak_0070656
132.269	-2.00694	0.330513	-6.0722	1.26166e-09	5.42814e-07	peak_0046766
176.564	-0.963273	0.158753	-6.06775	1.29718e-09	5.55221e-07	peak_0061034
164.096	-1.11002	0.18316	-6.06037	1.35805e-09	5.78292e-07	peak_0001295
27.8438	-1.99244	0.329507	-6.04673	1.47819e-09	6.26239e-07	peak_0066994
77.0062	-1.57102	0.25985	-6.04586	1.48613e-09	6.26409e-07	peak_0021318
807.587	-1.07814	0.178484	-6.04057	1.53574e-09	6.44048e-07	peak_0069211
195.255	1.02353	0.1695	6.0385	1.55549e-09	6.49055e-07	peak_0061943
358.441	0.646709	0.107173	6.03423	1.59726e-09	6.6315e-07	peak_0041264
267.558	1.02637	0.170282	6.02748	1.6654e-09	6.88001e-07	peak_0036742
81.4583	-1.44631	0.240542	-6.01272	1.82441e-09	7.49957e-07	peak_0014987
419.455	-0.982969	0.163749	-6.00291	1.93811e-09	7.91437e-07	peak_0006335
434.967	0.766025	0.12762	6.00239	1.94438e-09	7.91437e-07	peak_0007912
468.983	-0.861985	0.143751	-5.99638	2.01766e-09	8.17262e-07	peak_0068706
159.273	-1.10006	0.183626	-5.99074	2.08885e-09	8.41991e-07	peak_0054190
119.826	-1.14699	0.191607	-5.98614	2.1488e-09	8.61968e-07	peak_0013116
170.507	-1.32606	0.221595	-5.98415	2.17521e-09	8.68367e-07	peak_0015038
70.7884	-1.3999	0.23411	-5.97966	2.236e-09	8.88367e-07	peak_0014777
118.411	-1.04146	0.174301	-5.97506	2.3001e-09	9.0948e-07	peak_0057047
56.0057	-1.49182	0.249827	-5.97141	2.35207e-09	9.25622e-07	peak_0010588
97.5568	0.85838	0.143793	5.96956	2.37887e-09	9.31755e-07	peak_0069015
235.989	-1.02703	0.172462	-5.95514	2.59845e-09	1.00825e-06	peak_0009136
382.392	0.744528	0.125008	5.95584	2.58737e-09	1.00825e-06	peak_0027901
80.9958	-1.25597	0.211252	-5.9454	2.7579e-09	1.06514e-06	peak_0001455
81.8702	-0.984081	0.16556	-5.94394	2.78249e-09	1.06966e-06	peak_0061748
177.786	-1.38183	0.232571	-5.94154	2.8236e-09	1.08046e-06	peak_0019956
168.794	-1.03118	0.173799	-5.93317	2.97141e-09	1.13181e-06	peak_0053514
226.569	0.997685	0.168354	5.92611	3.10187e-09	1.1761e-06	peak_0078995
214.523	-0.750179	0.12662	-5.92466	3.12935e-09	1.18113e-06	peak_0069214
39.799	-1.54425	0.26078	-5.92166	3.18714e-09	1.1975e-06	peak_0005521
249.413	-1.24989	0.211135	-5.91986	3.22207e-09	1.20517e-06	peak_0033309
98.0421	-1.09283	0.184657	-5.91817	3.25537e-09	1.20675e-06	peak_0000771
109.595	-1.44447	0.244068	-5.9183	3.25291e-09	1.20675e-06	peak_0026923
128.785	-0.889036	0.15032	-5.9143	3.33287e-09	1.22999e-06	peak_0023650
150.286	-1.15683	0.19571	-5.91093	3.40172e-09	1.24985e-06	peak_0033275
238.003	-1.01544	0.171939	-5.90577	3.50994e-09	1.28393e-06	peak_0004211
102.98	-1.40537	0.238073	-5.90313	3.56679e-09	1.299e-06	peak_0035544
62.8345	-1.32797	0.224996	-5.90218	3.58738e-09	1.30079e-06	peak_0081985
72.1985	-1.33207	0.22596	-5.89518	3.74267e-09	1.3512e-06	peak_0019419
98.0118	-1.43136	0.242893	-5.89297	3.79315e-09	1.3635e-06	peak_0072332
36.4941	-1.47636	0.250691	-5.88917	3.88149e-09	1.38924e-06	peak_0023646
280.437	-1.0821	0.183966	-5.88205	4.05212e-09	1.44409e-06	peak_0074317
96.7763	-0.817211	0.139317	-5.86583	4.46894e-09	1.58582e-06	peak_0064453
314.408	-0.818025	0.139607	-5.8595	4.6425e-09	1.6404e-06	peak_0019258
250.498	-0.786752	0.134319	-5.85736	4.70294e-09	1.65472e-06	peak_0070546
157.782	-1.42627	0.243641	-5.854	4.79885e-09	1.67713e-06	peak_0061864
156.116	-1.22024	0.208455	-5.85372	4.80703e-09	1.67713e-06	peak_0076324
53.8633	-1.70357	0.291188	-5.85042	4.90323e-09	1.70353e-06	peak_0079396
67.4888	-1.4	0.239359	-5.84896	4.94648e-09	1.7114e-06	peak_0045288
71.6414	-1.32949	0.227388	-5.84678	5.01172e-09	1.72678e-06	peak_0075954
326.919	0.71124	0.121762	5.84121	5.18219e-09	1.77813e-06	peak_0016787
128.931	-1.37322	0.235481	-5.83157	5.49089e-09	1.8763e-06	peak_0049782
113.005	-1.32377	0.227715	-5.81325	6.1271e-09	2.08512e-06	peak_0060874
65.8463	-1.52293	0.262103	-5.81042	6.23153e-09	2.11201e-06	peak_0024248
118.202	-1.3542	0.233127	-5.80884	6.29059e-09	2.12336e-06	peak_0013817
17.0985	-2.30647	0.39711	-5.80815	6.31674e-09	2.12355e-06	peak_0049205
170.783	0.799595	0.137698	5.80687	6.36515e-09	2.1312e-06	peak_0024085
70.9717	-1.52179	0.262124	-5.80562	6.41288e-09	2.13855e-06	peak_0049490
273.543	-1.25916	0.216932	-5.80441	6.45929e-09	2.14541e-06	peak_0048594
221.632	-1.02564	0.176848	-5.79956	6.64907e-09	2.19965e-06	peak_0016842
105.532	-1.55948	0.269089	-5.79541	6.81554e-09	2.24032e-06	peak_0030072
198.079	-1.32531	0.228693	-5.79515	6.82595e-09	2.24032e-06	peak_0042706
418.501	-1.12767	0.194632	-5.79385	6.87889e-09	2.2488e-06	peak_0051170
198.194	-0.958179	0.165445	-5.79154	6.97448e-09	2.27111e-06	peak_0011304
45.77	-1.88321	0.325259	-5.78989	7.04346e-09	2.28461e-06	peak_0068735
79.6976	1.02004	0.176236	5.78793	7.12574e-09	2.29433e-06	peak_0043508
48.3861	-1.38532	0.239349	-5.78786	7.12867e-09	2.29433e-06	peak_0047125
159.935	-1.02229	0.176673	-5.78632	7.19438e-09	2.30654e-06	peak_0006453
452.363	0.840116	0.14524	5.78433	7.28026e-09	2.32509e-06	peak_0000626
324.619	-1.0667	0.184557	-5.7798	7.479e-09	2.37941e-06	peak_0055663
55.378	-1.15147	0.199398	-5.77475	7.7068e-09	2.44253e-06	peak_0031554
356.762	-1.11825	0.193671	-5.77396	7.74301e-09	2.44467e-06	peak_0066127
75.5432	-1.31565	0.227897	-5.77297	7.78842e-09	2.44969e-06	peak_0024687
136.827	1.13459	0.196718	5.76759	8.04147e-09	2.51974e-06	peak_0080294
50.2968	-1.35116	0.234349	-5.7656	8.13654e-09	2.53995e-06	peak_0081574
166.174	-1.01745	0.176539	-5.7633	8.2487e-09	2.56532e-06	peak_0003907
547.056	0.876386	0.152095	5.76208	8.30826e-09	2.5742e-06	peak_0012178
154.774	-1.22661	0.212903	-5.76135	8.34417e-09	2.57571e-06	peak_0009522
177.665	-1.1844	0.205859	-5.75344	8.74457e-09	2.68931e-06	peak_0061645
90.429	-1.24219	0.215981	-5.75138	8.852e-09	2.7123e-06	peak_0007548
249.074	0.558775	0.0971861	5.74953	8.94899e-09	2.7267e-06	peak_0024827
90.2052	-1.55044	0.269678	-5.74924	8.96466e-09	2.7267e-06	peak_0029731
298.787	-0.865468	0.150559	-5.74837	9.01063e-09	2.73068e-06	peak_0066174
210.555	1.00092	0.174397	5.73932	9.50587e-09	2.87029e-06	peak_0020583
410.923	-0.933095	0.162657	-5.73659	9.66028e-09	2.90634e-06	peak_0080420
374.292	-0.731351	0.127542	-5.73419	9.79814e-09	2.93718e-06	peak_0038186
174.821	-1.30818	0.228412	-5.72728	1.02055e-08	3.02948e-06	peak_0015238
240.898	-1.01893	0.177925	-5.72674	1.02379e-08	3.02948e-06	peak_0023791
927.621	1.04129	0.181834	5.72658	1.02475e-08	3.02948e-06	peak_0046191
167.874	1.07354	0.187468	5.72651	1.0252e-08	3.02948e-06	peak_0057077
139.709	-1.34098	0.234258	-5.72438	1.03815e-08	3.04607e-06	peak_0001591
55.5707	-1.78547	0.31189	-5.72468	1.03626e-08	3.04607e-06	peak_0072622
661.587	0.841161	0.146988	5.72267	1.04863e-08	3.06599e-06	peak_0034248
286.012	-1.03198	0.180354	-5.72196	1.05299e-08	3.06793e-06	peak_0019638
63.6512	-1.14664	0.201249	-5.69762	1.2149e-08	3.52729e-06	peak_0063425
195.483	-1.18971	0.208928	-5.69436	1.23838e-08	3.58292e-06	peak_0021055
247.837	0.6502	0.114199	5.69355	1.24422e-08	3.58734e-06	peak_0073883
145.827	-1.0178	0.179264	-5.67769	1.36529e-08	3.92279e-06	peak_0071613
112.328	0.907225	0.159807	5.677	1.3708e-08	3.92503e-06	peak_0015535
90.6018	-1.26422	0.22273	-5.67601	1.37874e-08	3.93419e-06	peak_0051416
222.838	-0.918044	0.161844	-5.6724	1.40808e-08	4.00416e-06	peak_0018069
328.466	0.918911	0.162075	5.66968	1.43066e-08	4.05449e-06	peak_0080509
540.601	0.706713	0.124687	5.66788	1.44571e-08	4.08321e-06	peak_0041822
86.9136	-0.956929	0.168867	-5.66675	1.45535e-08	4.0965e-06	peak_0055087
852.029	-0.616842	0.108896	-5.66449	1.47461e-08	4.13667e-06	peak_0027882
43.9121	-1.95196	0.344802	-5.66111	1.50397e-08	4.19074e-06	peak_0017714
115.776	-1.29766	0.229216	-5.66131	1.50223e-08	4.19074e-06	peak_0021886
62.2683	-1.76396	0.311791	-5.65752	1.53573e-08	4.26492e-06	peak_0057545
62.057	-1.71481	0.3034	-5.65198	1.58613e-08	4.3902e-06	peak_0050752
60.321	-1.07474	0.190396	-5.64477	1.65403e-08	4.56291e-06	peak_0037732
488.643	0.9294	0.164687	5.64344	1.66688e-08	4.58314e-06	peak_0001120
245.19	-1.88188	0.333546	-5.64202	1.68064e-08	4.60572e-06	peak_0043788
427.498	-1.48012	0.262608	-5.63623	1.73811e-08	4.74756e-06	peak_0019049
113.864	-1.26444	0.224444	-5.63366	1.76428e-08	4.80323e-06	peak_0042587
307.218	-1.05505	0.187338	-5.63176	1.78378e-08	4.84046e-06	peak_0014114
526.056	-0.920566	0.163606	-5.62674	1.83648e-08	4.96724e-06	peak_0079208
233.462	-0.973659	0.173072	-5.62574	1.84715e-08	4.97987e-06	peak_0011236
202.057	-0.958962	0.170496	-5.62453	1.86017e-08	4.98084e-06	peak_0007812
516.623	-0.91545	0.162775	-5.62403	1.8655e-08	4.98084e-06	peak_0045368
77.5781	0.995424	0.176961	5.62511	1.8539e-08	4.98084e-06	peak_0052921
281.972	0.548865	0.0976819	5.6189	1.92175e-08	5.11456e-06	peak_0033653
184.776	-0.757975	0.135187	-5.60688	2.06009e-08	5.46522e-06	peak_0052010
125.775	-1.3364	0.238461	-5.60426	2.09152e-08	5.53093e-06	peak_0003353
56.3856	-1.33306	0.237951	-5.60222	2.11627e-08	5.56097e-06	peak_0005203
84.7152	-1.72358	0.307659	-5.60224	2.11599e-08	5.56097e-06	peak_0027243
305.109	-0.95132	0.169897	-5.5994	2.151e-08	5.63441e-06	peak_0053804
156.261	-1.11989	0.200077	-5.59728	2.17746e-08	5.66794e-06	peak_0008623
79.2768	-1.01842	0.181946	-5.59735	2.17647e-08	5.66794e-06	peak_0078465
63.5589	1.27992	0.228729	5.59581	2.19594e-08	5.6982e-06	peak_0056663
443.965	-0.601989	0.107712	-5.58886	2.2856e-08	5.9123e-06	peak_0004474
55.5666	-1.20072	0.214862	-5.58833	2.29269e-08	5.9123e-06	peak_0041953
356.543	-0.790446	0.141524	-5.58523	2.33398e-08	6.00013e-06	peak_0039932
164.205	0.759262	0.135972	5.58396	2.35103e-08	6.02322e-06	peak_0030498
634.059	0.661955	0.118556	5.58348	2.35747e-08	6.02322e-06	peak_0054774
326.8	0.945458	0.169724	5.57057	2.53905e-08	6.46727e-06	peak_0024481
193.267	-1.62437	0.291642	-5.56972	2.55144e-08	6.47894e-06	peak_0050065
36.958	-1.38087	0.247949	-5.56918	2.55935e-08	6.47922e-06	peak_0003212
103.364	-1.16805	0.209807	-5.56723	2.58818e-08	6.51249e-06	peak_0025792
155.1	1.09644	0.196931	5.56765	2.58193e-08	6.51249e-06	peak_0060741
220.441	-1.05167	0.189054	-5.5628	2.65478e-08	6.63983e-06	peak_0003423
90.039	-1.39562	0.250861	-5.56332	2.64696e-08	6.63983e-06	peak_0050158
112.511	-0.848802	0.152615	-5.56173	2.67121e-08	6.66085e-06	peak_0061737
209.111	-1.18712	0.213588	-5.55798	2.72911e-08	6.78485e-06	peak_0030073
202.386	-1.05893	0.190581	-5.55632	2.75526e-08	6.82944e-06	peak_0008303
214.424	-1.06836	0.192499	-5.54993	2.85779e-08	7.06248e-06	peak_0014737
389.918	-0.705748	0.12723	-5.54701	2.90591e-08	7.1601e-06	peak_0013585
134.908	-1.34408	0.242624	-5.53975	3.02907e-08	7.44148e-06	peak_0075963
169.05	-0.722145	0.130444	-5.53607	3.09329e-08	7.56295e-06	peak_0006691
159.44	-0.847987	0.153184	-5.53575	3.09907e-08	7.56295e-06	peak_0049185
57.2806	-1.55869	0.281588	-5.53536	3.10584e-08	7.56295e-06	peak_0082847
120.74	-0.842462	0.152339	-5.53018	3.19903e-08	7.74751e-06	peak_0052789
43.5707	-2.04871	0.370464	-5.53011	3.20029e-08	7.74751e-06	peak_0062605
160.512	-0.951116	0.172072	-5.52744	3.24931e-08	7.84332e-06	peak_0064234
78.8771	-1.26267	0.22854	-5.52496	3.29557e-08	7.93191e-06	peak_0002782
259.893	0.806333	0.146063	5.52046	3.38116e-08	8.09771e-06	peak_0035483
44.7455	-1.6268	0.294693	-5.52031	3.38396e-08	8.09771e-06	peak_0076610
362.727	-0.71258	0.129193	-5.51562	3.47552e-08	8.28816e-06	peak_0016240
223.294	-0.783189	0.142005	-5.51522	3.48351e-08	8.28816e-06	peak_0074195
132.489	-1.09384	0.198353	-5.51464	3.49492e-08	8.29154e-06	peak_0002026
187.369	0.950836	0.172444	5.51388	3.51e-08	8.3036e-06	peak_0080351
81.7793	-1.24972	0.226708	-5.51245	3.5387e-08	8.34772e-06	peak_0050343
72.9311	-1.01588	0.184426	-5.50833	3.62244e-08	8.52104e-06	peak_0046480
233.896	-0.785369	0.142824	-5.49887	3.82227e-08	8.9657e-06	peak_0018064
159.586	-0.91366	0.166396	-5.49088	3.99929e-08	9.3545e-06	peak_0067938
516.188	-0.614957	0.112076	-5.48699	4.08851e-08	9.50962e-06	peak_0018501
114.4	-1.85744	0.338509	-5.48712	4.08538e-08	9.50962e-06	peak_0072039
210.206	-0.973562	0.177459	-5.48613	4.10838e-08	9.52914e-06	peak_0017126
42.715	-1.59783	0.291437	-5.48259	4.19152e-08	9.68566e-06	peak_0005697
164.443	-1.00213	0.182796	-5.48226	4.19919e-08	9.68566e-06	peak_0023704
141.819	-0.935632	0.170687	-5.48157	4.21557e-08	9.69652e-06	peak_0022435
78.9328	-1.16092	0.212035	-5.47512	4.37204e-08	1.00286e-05	peak_0001039
81.195	-1.17202	0.214151	-5.47288	4.42773e-08	1.01218e-05	peak_0003285
621.23	0.618844	0.113082	5.47251	4.43701e-08	1.01218e-05	peak_0005430
102.549	1.00216	0.183143	5.47201	4.4495e-08	1.01224e-05	peak_0075635
48.3696	-1.74195	0.318464	-5.46984	4.50431e-08	1.01913e-05	peak_0003750
285.43	-0.939796	0.171802	-5.47023	4.49451e-08	1.01913e-05	peak_0032298
77.0403	-1.19145	0.217902	-5.46785	4.55519e-08	1.02784e-05	peak_0025675
63.8161	-1.2678	0.232125	-5.46172	4.71554e-08	1.06114e-05	peak_0050680
243.648	0.850766	0.155898	5.45721	4.83687e-08	1.0855e-05	peak_0050994
236.371	0.784867	0.14406	5.44818	5.08875e-08	1.13895e-05	peak_0070616
26.0395	-1.72045	0.316016	-5.44419	5.20429e-08	1.16168e-05	peak_0025564
1820.92	-0.689069	0.126688	-5.4391	5.35518e-08	1.19215e-05	peak_0000761
105.467	1.11077	0.204267	5.43785	5.39282e-08	1.19732e-05	peak_0024465
138.445	-0.80589	0.148228	-5.43681	5.42417e-08	1.20107e-05	peak_0009639
23.7743	-1.59571	0.293653	-5.434	5.5106e-08	1.21696e-05	peak_0060700
214.684	-0.82892	0.152611	-5.4316	5.58511e-08	1.23015e-05	peak_0052135
335.864	-0.774625	0.142686	-5.4289	5.67023e-08	1.2423e-05	peak_0008105
105.583	1.10363	0.203284	5.429	5.667e-08	1.2423e-05	peak_0031480
228.93	0.651551	0.120111	5.42457	5.80953e-08	1.26647e-05	peak_0007137
259.697	-0.787469	0.145168	-5.42452	5.81103e-08	1.26647e-05	peak_0078773
82.3837	-1.08934	0.200861	-5.42332	5.85013e-08	1.27165e-05	peak_0002236
383.673	-0.970799	0.179022	-5.42278	5.86805e-08	1.27222e-05	peak_0013051
302.752	-0.801367	0.147992	-5.41495	6.13074e-08	1.31884e-05	peak_0022577
369.311	0.698864	0.129048	5.41555	6.11016e-08	1.31884e-05	peak_0050119
444.49	-1.07113	0.197804	-5.41513	6.12457e-08	1.31884e-05	peak_0058732
60.1527	-1.3327	0.246153	-5.41409	6.15996e-08	1.3217e-05	peak_0050340
52.859	-1.10837	0.204746	-5.4134	6.18391e-08	1.32342e-05	peak_0038163
58.8293	-1.33284	0.246259	-5.41233	6.22108e-08	1.32795e-05	peak_0047300
167.29	-1.17916	0.217899	-5.41151	6.24945e-08	1.33059e-05	peak_0048576
467.639	0.664826	0.122899	5.40953	6.31911e-08	1.34198e-05	peak_0040811
591.373	-0.770672	0.142496	-5.4084	6.3592e-08	1.34705e-05	peak_0062804
382.157	-0.811638	0.150165	-5.40497	6.48193e-08	1.36774e-05	peak_0010589
137.74	0.650268	0.120314	5.40475	6.48982e-08	1.36774e-05	peak_0033202
553.731	-0.654771	0.121185	-5.40308	6.55074e-08	1.37708e-05	peak_0051047
109.471	-1.06347	0.196907	-5.40088	6.63133e-08	1.3905e-05	peak_0043373
129.189	-1.18358	0.219228	-5.39884	6.70733e-08	1.4029e-05	peak_0073304
262.304	-0.838971	0.155523	-5.39452	6.87051e-08	1.43342e-05	peak_0078905
80.8812	-1.20558	0.22358	-5.39216	6.96164e-08	1.44879e-05	peak_0041614
69.8831	-1.24261	0.230557	-5.3896	7.06141e-08	1.46369e-05	peak_0006008
548.963	-0.594696	0.110345	-5.38942	7.0685e-08	1.46369e-05	peak_0080242
49.8491	-1.90087	0.352876	-5.38677	7.17335e-08	1.48171e-05	peak_0063423
63.2639	-0.921686	0.17116	-5.38494	7.24696e-08	1.4932e-05	peak_0065860
80.5884	0.888148	0.164982	5.38331	7.31286e-08	1.50305e-05	peak_0057235
233.703	0.961935	0.178725	5.3822	7.35829e-08	1.50849e-05	peak_0008964
158.566	-0.900061	0.16727	-5.38089	7.41201e-08	1.50849e-05	peak_0010669
195.755	0.674733	0.125384	5.38133	7.39373e-08	1.50849e-05	peak_0013067
76.4156	-1.25761	0.233712	-5.38102	7.40657e-08	1.50849e-05	peak_0063119
83.2058	-1.25369	0.233038	-5.37978	7.45779e-08	1.5141e-05	peak_0007365
155.63	-1.26654	0.235752	-5.37232	7.77281e-08	1.5742e-05	peak_0020447
221.765	-0.937185	0.174471	-5.37159	7.80459e-08	1.57679e-05	peak_0030142
143.879	-1.08355	0.201823	-5.36881	7.92585e-08	1.5974e-05	peak_0061279
31.5604	-1.51803	0.282937	-5.36525	8.08381e-08	1.62529e-05	peak_0064293
103.007	-1.09921	0.205021	-5.36146	8.25524e-08	1.65575e-05	peak_0053521
63.285	-1.23878	0.231123	-5.35986	8.32863e-08	1.66645e-05	peak_0065007
527.483	0.640365	0.119489	5.35917	8.36034e-08	1.66877e-05	peak_0011478
293.926	0.877404	0.163783	5.35711	8.4564e-08	1.6839e-05	peak_0001368
65.6536	-1.26201	0.23563	-5.35591	8.51258e-08	1.69103e-05	peak_0014679
113.717	-1.18202	0.220741	-5.35479	8.56551e-08	1.69748e-05	peak_0031231
402.523	-0.719396	0.134419	-5.3519	8.70364e-08	1.72075e-05	peak_0008101
73.7366	-1.18651	0.221743	-5.35083	8.75541e-08	1.72688e-05	peak_0021386
440.955	-0.713889	0.133474	-5.34852	8.8674e-08	1.74482e-05	peak_0072607
59.7469	-0.980658	0.183375	-5.34783	8.90134e-08	1.74736e-05	peak_0059284
99.3536	-1.55604	0.291064	-5.34605	8.98937e-08	1.76047e-05	peak_0041330
815.421	-0.518118	0.0969624	-5.3435	9.11696e-08	1.78126e-05	peak_0058376
37.4012	-1.96975	0.368666	-5.34292	9.14602e-08	1.78274e-05	peak_0060703
93.0254	-1.13765	0.212952	-5.34227	9.17912e-08	1.78501e-05	peak_0042835
152.808	-1.08546	0.203217	-5.3414	9.22308e-08	1.78518e-05	peak_0002590
37.4171	-1.54898	0.290005	-5.34121	9.23264e-08	1.78518e-05	peak_0027776
57.8043	-1.17479	0.219957	-5.34098	9.24449e-08	1.78518e-05	peak_0035096
87.634	-1.06145	0.198801	-5.33924	9.33357e-08	1.7982e-05	peak_0034273
18.8776	-2.51913	0.472411	-5.3325	9.68697e-08	1.86196e-05	peak_0068337
82.1122	-0.874909	0.164128	-5.33066	9.78567e-08	1.87659e-05	peak_0008138
230.453	-1.70831	0.320521	-5.32979	9.83241e-08	1.88121e-05	peak_0065100
77.077	-1.05815	0.198662	-5.32635	1.00206e-07	1.90082e-05	peak_0004124
76.1127	-1.23495	0.231851	-5.32646	1.00146e-07	1.90082e-05	peak_0017827
211.25	-0.89329	0.167676	-5.32748	9.95827e-08	1.90082e-05	peak_0022652
29.5292	-1.43222	0.268898	-5.32624	1.00265e-07	1.90082e-05	peak_0049431
141.575	-1.00717	0.18915	-5.32469	1.01127e-07	1.91281e-05	peak_0082961
73.7965	-1.14997	0.216037	-5.32305	1.02044e-07	1.92575e-05	peak_0016430
35.0067	-1.82863	0.343713	-5.32023	1.03636e-07	1.95137e-05	peak_0013343
154.319	-0.918275	0.172632	-5.31926	1.04192e-07	1.95739e-05	peak_0035271
116.236	-1.08572	0.204144	-5.31837	1.04703e-07	1.96256e-05	peak_0056741
162.408	-1.07399	0.201955	-5.31794	1.04948e-07	1.96272e-05	peak_0006753
389.923	-0.843712	0.158682	-5.31701	1.05486e-07	1.96835e-05	peak_0015913
158.081	-0.894748	0.168376	-5.31399	1.07251e-07	1.99679e-05	peak_0020073
34.4512	-1.33745	0.25172	-5.31325	1.07688e-07	2.00045e-05	peak_0042090
71.0372	-1.20723	0.227333	-5.31038	1.09396e-07	2.02764e-05	peak_0070459
87.7218	-1.20558	0.227042	-5.30993	1.09665e-07	2.02809e-05	peak_0079093
277.715	-0.764958	0.144098	-5.30861	1.10462e-07	2.03829e-05	peak_0066842
642.813	0.656135	0.123645	5.30661	1.11683e-07	2.05625e-05	peak_0064426
143.439	-0.800312	0.150843	-5.3056	1.12306e-07	2.06314e-05	peak_0060631
196.238	-1.04008	0.19606	-5.30489	1.12744e-07	2.06663e-05	peak_0006595
167.047	-0.865544	0.163216	-5.30306	1.13879e-07	2.0737e-05	peak_0016355
58.7745	-1.15613	0.217998	-5.3034	1.13667e-07	2.0737e-05	peak_0026227
37.3631	-1.59857	0.301434	-5.3032	1.13788e-07	2.0737e-05	peak_0045586
44.9164	-1.51013	0.284848	-5.30154	1.1483e-07	2.08644e-05	peak_0015714
117.774	0.926277	0.174839	5.29788	1.17155e-07	2.12403e-05	peak_0001769
107.518	-0.953169	0.179929	-5.29746	1.17424e-07	2.12427e-05	peak_0016706
58.1006	-1.01656	0.192115	-5.29142	1.21372e-07	2.19093e-05	peak_0002038
248.245	-0.92763	0.175389	-5.289	1.22987e-07	2.21526e-05	peak_0057256
405.156	-1.62431	0.307361	-5.28468	1.25922e-07	2.25345e-05	peak_0015747
22.2467	-1.86118	0.352134	-5.28543	1.25413e-07	2.25345e-05	peak_0060279
214.368	-0.768099	0.145339	-5.28487	1.25791e-07	2.25345e-05	peak_0062530
401.041	0.80174	0.151722	5.28426	1.26212e-07	2.25379e-05	peak_0051418
225.367	-0.737751	0.139626	-5.28377	1.26554e-07	2.25504e-05	peak_0051010
46.9041	-1.48704	0.281554	-5.28154	1.28101e-07	2.27772e-05	peak_0068566
197.175	-0.647446	0.12261	-5.28053	1.2881e-07	2.28545e-05	peak_0068615
61.2304	-1.01041	0.191391	-5.27928	1.29693e-07	2.29132e-05	peak_0029981
358.04	-0.740377	0.140239	-5.2794	1.29606e-07	2.29132e-05	peak_0064170
33.3519	-1.79283	0.339673	-5.2781	1.3053e-07	2.3012e-05	peak_0004116
199.576	0.82723	0.156773	5.2766	1.31603e-07	2.31521e-05	peak_0020273
122.453	-1.35898	0.257852	-5.27038	1.36142e-07	2.39e-05	peak_0015334
86.5463	-1.03489	0.196442	-5.26816	1.37796e-07	2.41393e-05	peak_0003937
25.1351	-1.78904	0.339733	-5.266	1.39429e-07	2.43739e-05	peak_0080806
135.255	-0.766794	0.145657	-5.2644	1.40651e-07	2.45359e-05	peak_0034262
364.608	-0.831988	0.158068	-5.26348	1.41355e-07	2.46071e-05	peak_0002182
281.797	-0.800036	0.152072	-5.2609	1.43355e-07	2.49006e-05	peak_0031236
419.24	-0.869775	0.16534	-5.26053	1.43641e-07	2.49006e-05	peak_0062170
124.804	-0.778445	0.148006	-5.25956	1.44403e-07	2.49804e-05	peak_0035213
117.488	-1.90476	0.362351	-5.25666	1.46698e-07	2.53248e-05	peak_0064195
172.898	-1.08193	0.205868	-5.25546	1.47657e-07	2.54374e-05	peak_0080801
115.64	-1.06538	0.202757	-5.25449	1.48438e-07	2.5519e-05	peak_0076480
164.559	-1.06506	0.202759	-5.25282	1.49791e-07	2.56985e-05	peak_0004771
172.52	-0.922701	0.175736	-5.2505	1.51687e-07	2.59701e-05	peak_0064316
115.462	-0.849945	0.161924	-5.24904	1.5289e-07	2.61221e-05	peak_0053574
709.499	-0.712811	0.135837	-5.24753	1.54152e-07	2.62837e-05	peak_0002256
131.826	-0.828604	0.158053	-5.24257	1.58358e-07	2.69456e-05	peak_0063310
137.165	-1.06679	0.203725	-5.23642	1.63725e-07	2.78018e-05	peak_0017501
49.5305	-1.15601	0.220976	-5.23139	1.68236e-07	2.85095e-05	peak_0033157
157.739	-1.11606	0.213506	-5.22728	1.72021e-07	2.90915e-05	peak_0021141
214.232	-0.818866	0.156728	-5.22475	1.74391e-07	2.93727e-05	peak_0082487
20.9664	-2.3082	0.441762	-5.22498	1.74169e-07	2.93727e-05	peak_0082663
55.5169	-1.65641	0.317121	-5.22328	1.7578e-07	2.94685e-05	peak_0039890
161.475	-0.892393	0.17087	-5.22265	1.76379e-07	2.94685e-05	peak_0056521
91.4186	-1.24579	0.238526	-5.22289	1.76151e-07	2.94685e-05	peak_0062555
323.34	0.873373	0.167225	5.22276	1.76278e-07	2.94685e-05	peak_0075677
85.9918	-1.06716	0.204395	-5.22104	1.77919e-07	2.96661e-05	peak_0076341
591.438	-0.574515	0.110059	-5.22008	1.78844e-07	2.97605e-05	peak_0017124
582.835	0.692775	0.132803	5.21655	1.82286e-07	3.02725e-05	peak_0062620
56.5006	-1.01224	0.194126	-5.21436	1.84458e-07	3.05721e-05	peak_0032336
60.6465	-1.32519	0.25419	-5.21337	1.85441e-07	3.06128e-05	peak_0052563
45.9156	-1.74279	0.334277	-5.21362	1.8519e-07	3.06128e-05	peak_0064934
209.46	-0.913344	0.175235	-5.21211	1.86708e-07	3.0761e-05	peak_0050341
27.2111	-1.78523	0.342579	-5.21113	1.87694e-07	3.08622e-05	peak_0067734
170.856	-0.88341	0.169558	-5.21008	1.88756e-07	3.09755e-05	peak_0027252
322.977	0.796349	0.15286	5.20967	1.89174e-07	3.09827e-05	peak_0046668
437.427	-0.534816	0.102682	-5.2085	1.90377e-07	3.11184e-05	peak_0065465
102.322	-0.951627	0.18275	-5.20726	1.91655e-07	3.12657e-05	peak_0074065
134.124	-1.24909	0.240085	-5.2027	1.96417e-07	3.19173e-05	peak_0003430
257.904	0.737914	0.141828	5.20289	1.96209e-07	3.19173e-05	peak_0041109
406.915	0.702417	0.135052	5.20107	1.98146e-07	3.21353e-05	peak_0063884
122.863	-1.08846	0.209467	-5.19633	2.03264e-07	3.2901e-05	peak_0060316
86.7029	-1.13263	0.218066	-5.19397	2.05856e-07	3.32558e-05	peak_0075132
776.527	0.525585	0.101219	5.19254	2.07447e-07	3.34477e-05	peak_0022266
109.974	-1.37278	0.26443	-5.19146	2.08647e-07	3.35761e-05	peak_0027346
137.814	-1.07677	0.207494	-5.18943	2.10943e-07	3.38798e-05	peak_0026741
385.827	-0.915949	0.176524	-5.1888	2.11652e-07	3.39281e-05	peak_0018277
120.044	0.834486	0.160874	5.18719	2.13495e-07	3.40919e-05	peak_0012189
29.0591	-1.5012	0.289403	-5.18723	2.13451e-07	3.40919e-05	peak_0023558
128.679	0.724049	0.139621	5.18582	2.15063e-07	3.42107e-05	peak_0016817
186.829	-0.770182	0.148511	-5.18602	2.14832e-07	3.42107e-05	peak_0055682
893.396	0.671733	0.129577	5.18405	2.17123e-07	3.44081e-05	peak_0013034
21.7694	-1.43397	0.27665	-5.18333	2.17962e-07	3.44081e-05	peak_0021906
289.471	-0.913248	0.17618	-5.18362	2.17622e-07	3.44081e-05	peak_0043648
328.02	-0.751152	0.144906	-5.1837	2.17525e-07	3.44081e-05	peak_0062994
156.189	0.739428	0.142682	5.18235	2.19108e-07	3.45235e-05	peak_0043897
79.4172	-1.67882	0.324113	-5.17975	2.22187e-07	3.49423e-05	peak_0029052
191.948	0.715981	0.138265	5.17832	2.23889e-07	3.51433e-05	peak_0077592
32.9817	-2.13785	0.413136	-5.17469	2.28286e-07	3.5766e-05	peak_0082471
137.799	-0.86813	0.167888	-5.17088	2.32988e-07	3.64339e-05	peak_0021713
54.0495	-1.60797	0.311021	-5.16997	2.3413e-07	3.65437e-05	peak_0072937
96.3249	-0.873402	0.168974	-5.16886	2.3552e-07	3.66917e-05	peak_0031882
329.613	-0.964789	0.186683	-5.16806	2.36532e-07	3.67803e-05	peak_0067286
224.967	-0.866635	0.167735	-5.1667	2.38263e-07	3.69801e-05	peak_0050846
1141.19	0.659612	0.127713	5.16481	2.40684e-07	3.72862e-05	peak_0040810
82.5257	-1.29809	0.251659	-5.15812	2.49446e-07	3.85717e-05	peak_0050295
156.375	-0.961859	0.186531	-5.15656	2.51527e-07	3.88212e-05	peak_0001639
30.0855	-1.25916	0.244345	-5.15322	2.56052e-07	3.94463e-05	peak_0008271
53.203	-1.70738	0.331537	-5.14989	2.60635e-07	3.99981e-05	peak_0007822
264.509	-0.713513	0.138548	-5.14993	2.60586e-07	3.99981e-05	peak_0009519
663.725	0.586062	0.113808	5.14957	2.61079e-07	3.99981e-05	peak_0063986
99.5568	-1.16962	0.227218	-5.14755	2.63911e-07	4.03575e-05	peak_0060940
90.3698	-1.27311	0.247621	-5.14136	2.72762e-07	4.16343e-05	peak_0055240
148.797	-1.07196	0.208595	-5.13895	2.7628e-07	4.20728e-05	peak_0005756
130.983	-0.989787	0.192627	-5.13835	2.77154e-07	4.20728e-05	peak_0012281
239.986	-0.9878	0.192239	-5.1384	2.7708e-07	4.20728e-05	peak_0019293
80.8005	-1.04099	0.202612	-5.13784	2.77915e-07	4.21113e-05	peak_0012629
194.756	-1.10253	0.21461	-5.13735	2.78637e-07	4.21438e-05	peak_0000610
200.433	0.836907	0.163018	5.13385	2.83882e-07	4.28589e-05	peak_0028561
210.669	-1.42852	0.27844	-5.13043	2.89086e-07	4.35654e-05	peak_0069210
35.4382	-1.29027	0.251528	-5.12974	2.90146e-07	4.3646e-05	peak_0002028
40.0246	-1.22215	0.238293	-5.12879	2.9161e-07	4.37869e-05	peak_0010466
113.431	-1.85941	0.362588	-5.12817	2.92572e-07	4.38211e-05	peak_0001584
456.565	-0.876422	0.17091	-5.12796	2.92893e-07	4.38211e-05	peak_0054667
130.558	0.875621	0.170796	5.1267	2.94868e-07	4.40372e-05	peak_0028352
158.809	-0.953364	0.186006	-5.12543	2.96853e-07	4.4254e-05	peak_0023163
323.214	-0.731786	0.142791	-5.12486	2.97762e-07	4.431e-05	peak_0073659
110.168	0.808252	0.157748	5.1237	2.9959e-07	4.43468e-05	peak_0026400
43.639	-1.94066	0.378762	-5.12369	2.99611e-07	4.43468e-05	peak_0063289
227.015	-0.935231	0.182523	-5.12391	2.99271e-07	4.43468e-05	peak_0077205
759.17	-0.651794	0.12724	-5.12256	3.01421e-07	4.45352e-05	peak_0051835
244.462	-1.59627	0.311781	-5.11984	3.05796e-07	4.51014e-05	peak_0073178
180.36	-0.974304	0.190429	-5.11637	3.11471e-07	4.56949e-05	peak_0023421
205.246	-0.723358	0.141376	-5.11653	3.112e-07	4.56949e-05	peak_0042579
199.194	-0.940813	0.183861	-5.11698	3.10463e-07	4.56949e-05	peak_0064599
68.8684	-0.942868	0.184321	-5.11536	3.13142e-07	4.58591e-05	peak_0036396
112.075	-0.841463	0.164523	-5.11456	3.14471e-07	4.59725e-05	peak_0057387
39.7148	-1.88347	0.368336	-5.11345	3.16329e-07	4.61629e-05	peak_0072140
74.4221	-1.54694	0.302609	-5.112	3.18761e-07	4.64362e-05	peak_0032333
440.784	-0.898574	0.17586	-5.1096	3.22848e-07	4.69492e-05	peak_0048810
74.2953	-1.10058	0.215466	-5.10789	3.25779e-07	4.72927e-05	peak_0015717
42.7263	-1.58181	0.309781	-5.10622	3.28666e-07	4.74505e-05	peak_0002201
266.102	0.795329	0.155765	5.10594	3.29152e-07	4.74505e-05	peak_0003672
151.043	-0.920228	0.180211	-5.10641	3.28346e-07	4.74505e-05	peak_0064190
155.883	-0.946429	0.185348	-5.10623	3.2865e-07	4.74505e-05	peak_0072158
89.4476	-1.08264	0.212214	-5.10167	3.3667e-07	4.83663e-05	peak_0033727
97.5509	-1.03798	0.203447	-5.102	3.3609e-07	4.83663e-05	peak_0038523
580.394	-0.83948	0.164641	-5.09886	3.41711e-07	4.90057e-05	peak_0077715
617.923	0.520564	0.102103	5.09844	3.42469e-07	4.90298e-05	peak_0042719
1104.61	-0.823875	0.161606	-5.09804	3.43192e-07	4.90486e-05	peak_0079825
387.382	-0.618795	0.121397	-5.09726	3.44598e-07	4.90872e-05	peak_0004788
78.5115	-1.06581	0.209135	-5.09627	3.46418e-07	4.90872e-05	peak_0069398
207.875	-0.970125	0.190338	-5.09686	3.45338e-07	4.90872e-05	peak_0069536
45.7988	-1.12432	0.220599	-5.09666	3.45702e-07	4.90872e-05	peak_0074192
13.4897	-2.05859	0.403933	-5.09636	3.46255e-07	4.90872e-05	peak_0081859
86.6423	-1.06375	0.20886	-5.09311	3.52229e-07	4.98258e-05	peak_0012077
217.466	0.905617	0.177842	5.09227	3.53808e-07	4.98906e-05	peak_0016853
204.52	-0.752149	0.147705	-5.09222	3.53889e-07	4.98906e-05	peak_0033302
161.904	-1.02679	0.201675	-5.09131	3.55603e-07	5.00472e-05	peak_0001554
149.743	-0.829206	0.162909	-5.08999	3.58084e-07	5.03111e-05	peak_0031284
353.453	-0.547967	0.107699	-5.08796	3.61942e-07	5.07673e-05	peak_0027501
265.637	-0.975223	0.191869	-5.08276	3.71989e-07	5.20885e-05	peak_0053038
192.697	0.826723	0.162716	5.08076	3.75922e-07	5.24623e-05	peak_0020290
325.773	-0.862613	0.169774	-5.08095	3.75551e-07	5.24623e-05	peak_0052157
281.767	-0.984723	0.19396	-5.07693	3.83576e-07	5.34406e-05	peak_0064769
34.0687	-1.32512	0.261056	-5.07599	3.85475e-07	5.36152e-05	peak_0016590
209.035	0.592847	0.116951	5.0692	3.995e-07	5.5473e-05	peak_0041258
133.644	-1.16125	0.229118	-5.06837	4.01235e-07	5.5621e-05	peak_0014568
54.6818	-1.72177	0.339933	-5.06504	4.0831e-07	5.65074e-05	peak_0004748
536.246	0.635121	0.125444	5.063	4.12713e-07	5.6927e-05	peak_0020272
77.6365	-1.26569	0.249973	-5.06329	4.12085e-07	5.6927e-05	peak_0026237
100.453	-1.07263	0.211927	-5.06132	4.16365e-07	5.72256e-05	peak_0011305
196.276	-0.90917	0.17964	-5.06105	4.16945e-07	5.72256e-05	peak_0021403
47.4409	-1.67469	0.330896	-5.06109	4.1687e-07	5.72256e-05	peak_0057780
231.303	-0.706883	0.139709	-5.05966	4.19998e-07	5.75494e-05	peak_0067261
87.8894	-1.45231	0.287119	-5.0582	4.2324e-07	5.78981e-05	peak_0035371
239.702	-1.37341	0.271671	-5.0554	4.29496e-07	5.86573e-05	peak_0051834
124.071	-1.26161	0.249652	-5.05349	4.33803e-07	5.91483e-05	peak_0025505
327.253	-0.746105	0.147754	-5.04964	4.42636e-07	6.02537e-05	peak_0028494
344.547	0.714639	0.141643	5.04537	4.52656e-07	6.14413e-05	peak_0045219
110.324	-0.979476	0.194137	-5.04529	4.52841e-07	6.14413e-05	peak_0061539
174.511	-0.824727	0.163487	-5.04462	4.54435e-07	6.1557e-05	peak_0018590
38.7369	-1.5789	0.313103	-5.04274	4.58912e-07	6.19613e-05	peak_0035270
74.0688	-0.972175	0.192784	-5.04283	4.58688e-07	6.19613e-05	peak_0064706
64.8572	-1.00214	0.198744	-5.04238	4.59776e-07	6.19772e-05	peak_0016946
42.308	-1.15827	0.229732	-5.04183	4.61102e-07	6.20552e-05	peak_0042840
41.5908	-1.67531	0.332427	-5.03962	4.66445e-07	6.25983e-05	peak_0012407
171.83	-1.0054	0.199503	-5.03954	4.66645e-07	6.25983e-05	peak_0079176
91.294	-1.16948	0.232114	-5.0384	4.69436e-07	6.28711e-05	peak_0040410
189.998	-1.10404	0.219175	-5.03725	4.7228e-07	6.30486e-05	peak_0008187
65.8684	-1.19629	0.23748	-5.03744	4.71792e-07	6.30486e-05	peak_0016241
272.698	-0.797615	0.158421	-5.03477	4.78427e-07	6.37667e-05	peak_0059975
479.222	0.737369	0.146524	5.03241	4.84361e-07	6.44541e-05	peak_0033272
73.5713	-1.23441	0.245392	-5.03036	4.89555e-07	6.50411e-05	peak_0061166
65.252	-1.15297	0.22925	-5.02929	4.923e-07	6.53013e-05	peak_0028745
109.397	-1.22714	0.244025	-5.02873	4.93738e-07	6.53876e-05	peak_0075722
544.871	0.749452	0.149098	5.02658	4.99294e-07	6.5731e-05	peak_0030496
115.421	-1.05873	0.210602	-5.02717	4.97762e-07	6.5731e-05	peak_0035191
163.185	0.743051	0.147822	5.02665	4.99117e-07	6.5731e-05	peak_0035944
229.672	-1.48814	0.296058	-5.02651	4.99498e-07	6.5731e-05	peak_0067911
230.021	-0.970857	0.193272	-5.02326	5.08011e-07	6.67456e-05	peak_0063749
80.1377	-1.01728	0.202544	-5.02253	5.09959e-07	6.68956e-05	peak_0044925
89.1903	-1.12872	0.224824	-5.02048	5.15433e-07	6.75071e-05	peak_0019652
51.6704	-1.44797	0.288432	-5.02014	5.16333e-07	6.75185e-05	peak_0070214
41.9534	1.22566	0.244257	5.01791	5.22375e-07	6.82011e-05	peak_0003488
114.731	-1.1884	0.236933	-5.01577	5.28217e-07	6.88556e-05	peak_0016350
100.565	-0.915543	0.182553	-5.01522	5.29737e-07	6.89455e-05	peak_0020443
72.688	-1.36641	0.272499	-5.01437	5.32082e-07	6.90344e-05	peak_0037372
139.806	-0.859291	0.171364	-5.01443	5.31922e-07	6.90344e-05	peak_0052987
65.9688	-1.41807	0.282856	-5.0134	5.34755e-07	6.92728e-05	peak_0051489
631.262	-0.756137	0.150842	-5.01278	5.36489e-07	6.93312e-05	peak_0007570
12.9657	-2.55618	0.509946	-5.01264	5.36875e-07	6.93312e-05	peak_0064247
41.4069	-1.74137	0.34762	-5.0094	5.46009e-07	7.03832e-05	peak_0069243
53.0766	-1.28184	0.2559	-5.00915	5.46717e-07	7.03832e-05	peak_0082964
79.3359	-0.961012	0.191915	-5.00748	5.51485e-07	7.07776e-05	peak_0043286
72.3933	-1.29648	0.258901	-5.00763	5.51051e-07	7.07776e-05	peak_0075310
165.879	0.815934	0.162964	5.00685	5.5328e-07	7.08984e-05	peak_0004272
12.1189	-2.55076	0.509723	-5.0042	5.6095e-07	7.16601e-05	peak_0023040
312.989	-0.897067	0.179258	-5.00433	5.60579e-07	7.16601e-05	peak_0037585
363.838	-0.754476	0.150784	-5.00367	5.62479e-07	7.1745e-05	peak_0008750
288.325	0.760512	0.152085	5.00057	5.71614e-07	7.27983e-05	peak_0076984
753.708	-0.571425	0.114297	-4.99948	5.74853e-07	7.30988e-05	peak_0079882
87.8216	-0.953206	0.190704	-4.99835	5.78242e-07	7.34173e-05	peak_0012090
275.209	-0.942907	0.188683	-4.9973	5.81381e-07	7.37032e-05	peak_0064250
109.341	-1.27517	0.255328	-4.99424	5.90685e-07	7.47685e-05	peak_0044519
335.792	-0.895255	0.179286	-4.99344	5.93133e-07	7.49641e-05	peak_0062381
86.0642	-1.2338	0.247119	-4.99273	5.95327e-07	7.5127e-05	peak_0006517
49.9046	-1.29088	0.258636	-4.9911	6.00374e-07	7.55343e-05	peak_0057287
119.248	-1.08826	0.218035	-4.99121	6.00011e-07	7.55343e-05	peak_0071400
79.2681	-1.0773	0.21587	-4.99049	6.02277e-07	7.56591e-05	peak_0078328
12.8699	-2.12653	0.426259	-4.98882	6.07505e-07	7.62006e-05	peak_0057386
129.123	-1.28104	0.256811	-4.98826	6.0927e-07	7.63067e-05	peak_0069028
218.48	0.85076	0.170623	4.9862	6.15783e-07	7.70062e-05	peak_0063908
614.73	-0.749137	0.15033	-4.98329	6.25107e-07	7.79375e-05	peak_0012598
178.262	0.665644	0.133571	4.98344	6.24645e-07	7.79375e-05	peak_0050217
228.269	-0.68382	0.137427	-4.97586	6.49576e-07	8.07458e-05	peak_0002016
139.26	-1.68979	0.339586	-4.97603	6.49027e-07	8.07458e-05	peak_0063859
102.595	0.899443	0.180852	4.97336	6.58038e-07	8.16754e-05	peak_0063977
220.036	-0.912572	0.183552	-4.97172	6.63612e-07	8.22443e-05	peak_0068421
135.343	-0.917833	0.18466	-4.9704	6.68153e-07	8.26837e-05	peak_0012885
337.58	0.636508	0.12808	4.96962	6.70856e-07	8.28946e-05	peak_0030291
46.9028	1.24913	0.251389	4.96891	6.73308e-07	8.30741e-05	peak_0009145
383.96	-0.752728	0.15154	-4.96721	6.79235e-07	8.3681e-05	peak_0053289
659.537	0.85965	0.1731	4.96621	6.8273e-07	8.39869e-05	peak_0081846
582.072	0.840571	0.169281	4.96553	6.85151e-07	8.416e-05	peak_0058312
103.189	-0.989651	0.199348	-4.96444	6.88996e-07	8.45074e-05	peak_0059477
226.622	-0.71392	0.143816	-4.96412	6.90141e-07	8.4523e-05	peak_0062952
152.748	-0.757942	0.152694	-4.96381	6.91227e-07	8.45313e-05	peak_0064785
166.433	0.850054	0.171263	4.96343	6.92576e-07	8.45717e-05	peak_0007186
1286.04	-0.57073	0.115135	-4.95707	7.15646e-07	8.72604e-05	peak_0038497
404.935	-0.691496	0.139571	-4.95445	7.25348e-07	8.83138e-05	peak_0044538
310.07	-0.965049	0.194798	-4.95411	7.26607e-07	8.83375e-05	peak_0033389
321.519	-0.742623	0.149958	-4.95222	7.33718e-07	8.90717e-05	peak_0057046
69.2423	-1.24542	0.251514	-4.9517	7.35662e-07	8.91772e-05	peak_0038209
110.675	-0.986148	0.199323	-4.9475	7.51737e-07	9.09931e-05	peak_0042698
99.539	0.932301	0.188454	4.9471	7.53284e-07	9.10368e-05	peak_0005740
164.811	-0.692233	0.139935	-4.94684	7.54291e-07	9.10368e-05	peak_0071269
231.099	-0.948235	0.191772	-4.94461	7.62966e-07	9.19501e-05	peak_0025744
283.804	-0.921377	0.186386	-4.94337	7.67822e-07	9.24012e-05	peak_0045212
97.1719	-1.35996	0.275192	-4.94185	7.73828e-07	9.29893e-05	peak_0018727
53.865	-1.03472	0.209429	-4.94067	7.78531e-07	9.34192e-05	peak_0062639
69.0651	1.00454	0.203358	4.93978	7.8211e-07	9.37133e-05	peak_0025943
448.561	-0.707019	0.143212	-4.93686	7.93892e-07	9.49879e-05	peak_0080418
166.194	0.786995	0.159535	4.93304	8.0958e-07	9.67256e-05	peak_0046075
82.9142	-1.2892	0.261384	-4.93222	8.13014e-07	9.69963e-05	peak_0013245
234.521	-1.02479	0.207828	-4.93093	8.18376e-07	9.74959e-05	peak_0078308
380.675	0.705558	0.143159	4.9285	8.28619e-07	9.85748e-05	peak_0030507
153.178	-0.711258	0.14437	-4.92664	8.36551e-07	9.9376e-05	peak_0051881
249.078	-1.09036	0.221339	-4.9262	8.38421e-07	9.94559e-05	peak_0007464
66.7697	-1.25172	0.254261	-4.92298	8.52342e-07	0.000100963	peak_0074306
52.499	0.938352	0.190625	4.9225	8.54461e-07	0.00010107	peak_0058296
151.357	-0.847116	0.172121	-4.92163	8.58272e-07	0.000101376	peak_0073961
146.516	-0.890509	0.180991	-4.92019	8.64614e-07	0.00010198	peak_0008523
58.3669	-1.26134	0.2565	-4.91752	8.76496e-07	0.000103235	peak_0048595
95.8123	1.08398	0.220524	4.91547	8.85716e-07	0.000104092	peak_0045725
45.1659	-1.38514	0.281799	-4.91534	8.86281e-07	0.000104092	peak_0062772
260.338	-0.997757	0.203004	-4.91496	8.88015e-07	0.000104149	peak_0027836
184.076	-0.957839	0.19493	-4.91376	8.93467e-07	0.00010464	peak_0038312
183.429	-0.793737	0.161705	-4.90855	9.17545e-07	0.000107309	peak_0009967
212.473	-0.890192	0.181376	-4.90798	9.20191e-07	0.000107467	peak_0076482
52.4874	-1.25119	0.254943	-4.9077	9.21492e-07	0.000107468	peak_0047611
64.4714	1.005	0.204806	4.90706	9.24524e-07	0.00010767	peak_0079248
172.946	0.70322	0.143379	4.90464	9.35975e-07	0.000108851	peak_0067640
67.2441	-0.995335	0.203129	-4.90002	9.58258e-07	0.000111287	peak_0067919
269.259	-0.776589	0.158529	-4.89871	9.64674e-07	0.000111875	peak_0072207
1557.1	0.683277	0.139501	4.89802	9.6809e-07	0.000112115	peak_0039070
217.899	-0.633805	0.129408	-4.89773	9.69497e-07	0.000112121	peak_0042752
517.193	0.64016	0.130715	4.89737	9.71277e-07	0.000112171	peak_0065955
44.9344	-1.59299	0.325377	-4.89583	9.78895e-07	0.000112894	peak_0081983
99.5285	-1.22286	0.250096	-4.88957	1.01058e-06	0.000116386	peak_0070327
81.9086	-1.32004	0.270111	-4.88704	1.02361e-06	0.000117724	peak_0039707
24.8717	-1.65981	0.339836	-4.88415	1.03876e-06	0.0001193	peak_0003941
1209.13	-0.851586	0.174473	-4.88092	1.05594e-06	0.000121106	peak_0035924
81.67	-1.84394	0.377818	-4.88049	1.05824e-06	0.000121203	peak_0064589
359.796	-0.669179	0.137135	-4.87972	1.06235e-06	0.000121506	peak_0064920
99.881	-1.33326	0.273243	-4.87938	1.06418e-06	0.000121548	peak_0021684
99.6257	-1.40758	0.288567	-4.87785	1.07247e-06	0.000122327	peak_0017169
37.0568	-1.2233	0.25098	-4.87408	1.09315e-06	0.000124004	peak_0000725
312.275	0.799367	0.163998	4.87424	1.0923e-06	0.000124004	peak_0006445
144.433	-0.775625	0.15913	-4.87417	1.09268e-06	0.000124004	peak_0047751
73.4564	-1.46368	0.300268	-4.87459	1.09033e-06	0.000124004	peak_0066628
154.586	0.72539	0.148847	4.87339	1.09698e-06	0.000124269	peak_0049476
132.672	0.658531	0.135209	4.87047	1.11334e-06	0.00012595	peak_0052252
111.249	-1.147	0.235531	-4.86982	1.11698e-06	0.000126189	peak_0055091
258.861	-0.693484	0.14246	-4.86791	1.12784e-06	0.000127243	peak_0079631
637.427	-0.722262	0.14838	-4.86764	1.12938e-06	0.000127245	peak_0056376
178.473	-0.826895	0.170021	-4.86349	1.15333e-06	0.000129591	peak_0009185
44.1377	-1.03547	0.212903	-4.86358	1.15279e-06	0.000129591	peak_0010391
45.8169	-1.17355	0.241325	-4.86296	1.15645e-06	0.000129766	peak_0013191
235.519	-0.708348	0.145704	-4.86155	1.16472e-06	0.000130518	peak_0028967
33.9087	-1.49758	0.30817	-4.85958	1.17633e-06	0.000131418	peak_0002606
503.082	0.836168	0.172073	4.85939	1.1775e-06	0.000131418	peak_0063436
187.243	-0.714088	0.146949	-4.85942	1.17728e-06	0.000131418	peak_0068422
48.9122	-1.1314	0.232848	-4.85897	1.17998e-06	0.000131518	peak_0078523
150.14	0.787471	0.162112	4.85758	1.18827e-06	0.000132265	peak_0013685
49.4471	-1.50408	0.309675	-4.85695	1.19209e-06	0.000132512	peak_0050259
41.3712	-1.15318	0.237444	-4.85664	1.19394e-06	0.00013254	peak_0005675
135.373	-0.710115	0.146233	-4.85606	1.19747e-06	0.000132754	peak_0060861
44.3356	-1.17893	0.242938	-4.85281	1.21727e-06	0.000134591	peak_0008831
156.451	0.945122	0.194756	4.85285	1.21701e-06	0.000134591	peak_0050822
124.402	-0.960458	0.198224	-4.84532	1.26407e-06	0.000139579	peak_0048263
54.4901	-1.51799	0.313321	-4.84485	1.26709e-06	0.000139727	peak_0013101
1057.27	-0.602269	0.124349	-4.84337	1.27654e-06	0.000140582	peak_0011121
57.6276	-1.18315	0.244446	-4.84014	1.29745e-06	0.000142695	peak_0022213
154.9	-1.07196	0.221542	-4.83862	1.30742e-06	0.000143601	peak_0045571
288.874	-0.674686	0.139451	-4.83815	1.31052e-06	0.000143752	peak_0013708
239.496	-0.949035	0.196197	-4.83716	1.31705e-06	0.000144277	peak_0081028
64.2557	-0.926688	0.191671	-4.83477	1.33299e-06	0.000145831	peak_0035152
36.6832	-1.75056	0.362131	-4.83405	1.33782e-06	0.000146168	peak_0048814
310.967	0.520768	0.107745	4.83333	1.34266e-06	0.000146504	peak_0048007
441.511	0.655587	0.135659	4.83263	1.34744e-06	0.000146832	peak_0029977
279.422	-0.808558	0.167495	-4.82736	1.38356e-06	0.000150571	peak_0066859
49.408	-1.80374	0.373797	-4.82545	1.39684e-06	0.000151817	peak_0045412
199.949	-0.812967	0.168503	-4.82466	1.40244e-06	0.000152226	peak_0022378
80.4176	-0.828939	0.171859	-4.82337	1.41156e-06	0.000153016	peak_0012552
76.8276	-1.2789	0.265181	-4.82274	1.41601e-06	0.000153098	peak_0001827
197.04	0.919938	0.190762	4.82245	1.41809e-06	0.000153098	peak_0055322
1368.35	0.586884	0.121704	4.82222	1.41969e-06	0.000153098	peak_0063437
299.165	-0.486115	0.1008	-4.82256	1.41727e-06	0.000153098	peak_0066099
779.396	0.534698	0.110908	4.82111	1.42762e-06	0.000153753	peak_0069040
147.967	0.832363	0.172686	4.82009	1.43494e-06	0.000154341	peak_0018130
517.249	-0.49424	0.102569	-4.8186	1.44569e-06	0.000155296	peak_0069381
44.5958	-1.47859	0.30687	-4.81831	1.44782e-06	0.000155325	peak_0013339
387.893	0.489359	0.101569	4.81799	1.45009e-06	0.000155367	peak_0005438
289.904	-0.76575	0.158981	-4.8166	1.46025e-06	0.000156254	peak_0026690
53.8805	-1.37387	0.285437	-4.81323	1.48509e-06	0.000158708	peak_0050151
74.6165	-0.813854	0.169129	-4.81202	1.4941e-06	0.000159465	peak_0044780
65.2839	0.900127	0.187126	4.81028	1.5072e-06	0.000160452	peak_0021019
765.674	-0.586484	0.121919	-4.81043	1.50606e-06	0.000160452	peak_0050543
129.771	-1.08779	0.226152	-4.81001	1.50924e-06	0.000160463	peak_0026548
286.934	-0.882241	0.183547	-4.80662	1.53504e-06	0.000162997	peak_0056762
667.045	0.589286	0.122669	4.80386	1.55635e-06	0.000165049	peak_0037274
131.923	-1.2048	0.250814	-4.80354	1.55881e-06	0.000165099	peak_0013893
291.21	0.716721	0.14922	4.8031	1.56226e-06	0.000165253	peak_0047612
282.094	0.8703	0.181239	4.80196	1.57121e-06	0.000165988	peak_0013176
648.3	0.771699	0.160784	4.79959	1.58989e-06	0.000167748	peak_0004803
199.847	-0.879403	0.183264	-4.79855	1.59818e-06	0.00016841	peak_0011700
74.208	-1.10013	0.229288	-4.79802	1.60242e-06	0.000168642	peak_0071170
64.1518	-0.901366	0.187891	-4.79729	1.60828e-06	0.000169044	peak_0006321
368.845	-0.741411	0.154556	-4.79703	1.61032e-06	0.000169045	peak_0002942
16.684	2.18551	0.45573	4.79563	1.62165e-06	0.00017002	peak_0034187
47.5217	-1.06823	0.222808	-4.79437	1.63184e-06	0.000170872	peak_0010273
196.371	-0.654864	0.136646	-4.79242	1.64778e-06	0.000172323	peak_0078338
264.932	0.619766	0.12936	4.79102	1.65934e-06	0.000173314	peak_0033665
251.367	-0.450357	0.0940363	-4.78918	1.67466e-06	0.000174694	peak_0069489
80.8582	-0.954845	0.199438	-4.78768	1.68721e-06	0.000175783	peak_0009417
35.9615	-1.33239	0.278318	-4.78729	1.69044e-06	0.000175899	peak_0053976
66.1606	-0.994352	0.207811	-4.78488	1.71091e-06	0.000177806	peak_0002265
380.591	-0.79049	0.165225	-4.78432	1.71565e-06	0.000178076	peak_0035222
568.777	-0.809734	0.169265	-4.78383	1.71989e-06	0.000178293	peak_0039117
161.069	-0.893362	0.18683	-4.78168	1.73833e-06	0.00017998	peak_0027677
453.724	-0.649576	0.13587	-4.78085	1.74551e-06	0.000180499	peak_0066220
502.702	1.18602	0.248185	4.77877	1.76374e-06	0.000182157	peak_0051434
92.0709	-0.853304	0.178581	-4.77826	1.76821e-06	0.000182391	peak_0063164
63.9704	0.838852	0.175592	4.77728	1.77686e-06	0.000182829	peak_0019041
34.9872	-1.32096	0.276495	-4.77752	1.77468e-06	0.000182829	peak_0067737
568.899	-0.784243	0.164213	-4.77577	1.79017e-06	0.000183971	peak_0066915
95.5013	-0.83785	0.175515	-4.77365	1.80913e-06	0.000185479	peak_0067683
72.9587	-1.31514	0.2755	-4.77363	1.80931e-06	0.000185479	peak_0068702
329.985	0.627184	0.131409	4.77278	1.81699e-06	0.000186036	peak_0027049
107.213	-1.05814	0.221739	-4.772	1.82408e-06	0.000186533	peak_0065094
55.9467	-1.14152	0.239384	-4.76855	1.85558e-06	0.00018952	peak_0081423
117.04	-0.838023	0.175802	-4.76685	1.87127e-06	0.000190888	peak_0074235
413.116	0.596086	0.12507	4.76603	1.87895e-06	0.000191436	peak_0073941
144.387	-0.944931	0.198322	-4.76464	1.89195e-06	0.000192289	peak_0058639
235.124	-0.690105	0.144837	-4.7647	1.89131e-06	0.000192289	peak_0073371
46.5008	-1.39943	0.29374	-4.76418	1.89627e-06	0.000192492	peak_0078192
43.0207	-1.50152	0.31524	-4.7631	1.90641e-06	0.000193285	peak_0054306
313.408	-0.698329	0.146659	-4.76159	1.92072e-06	0.000194499	peak_0081350
228.731	0.820011	0.172351	4.75779	1.95724e-06	0.000197955	peak_0080399
143.274	0.878601	0.184721	4.75637	1.97109e-06	0.000199114	peak_0028902
34.9139	-1.80446	0.379431	-4.75571	1.97745e-06	0.000199514	peak_0065260
126.226	-0.710134	0.149381	-4.75385	1.9958e-06	0.000201121	peak_0014313
15.4162	-1.75973	0.370237	-4.75298	2.0044e-06	0.000201742	peak_0060068
55.2281	-1.65618	0.348536	-4.75181	2.01608e-06	0.000202672	peak_0014241
190.425	-0.796823	0.167711	-4.75116	2.02254e-06	0.000203075	peak_0054490
29.9277	-1.43465	0.301998	-4.75053	2.02889e-06	0.000203467	peak_0021356
42.534	-1.2488	0.262941	-4.74935	2.04074e-06	0.000204409	peak_0080739
421.645	-0.839348	0.176778	-4.74803	2.05404e-06	0.000205493	peak_0062326
207.261	-0.712046	0.149995	-4.74712	2.06334e-06	0.000206175	peak_0014886
71.2171	-0.995133	0.209701	-4.74549	2.08003e-06	0.000207096	peak_0005455
1019.27	-0.840515	0.177113	-4.74563	2.07859e-06	0.000207096	peak_0016243
716.371	-0.670137	0.141205	-4.74585	2.07634e-06	0.000207096	peak_0042498
545.095	0.419608	0.0884443	4.74432	2.09208e-06	0.000207797	peak_0038256
246.438	0.772641	0.162849	4.74452	2.08999e-06	0.000207797	peak_0046357
92.9306	-1.16856	0.24641	-4.74233	2.11277e-06	0.000209601	peak_0003936
780.276	0.568031	0.119829	4.74034	2.13355e-06	0.00021141	peak_0025632
241.36	-1.0018	0.211362	-4.73973	2.14006e-06	0.000211803	peak_0007198
111.792	0.724052	0.152786	4.73901	2.14766e-06	0.000212049	peak_0004608
242.63	0.653348	0.137863	4.73913	2.14642e-06	0.000212049	peak_0079839
52.0437	0.939613	0.19835	4.73715	2.16747e-06	0.000213751	peak_0014082
79.8595	-0.800853	0.169146	-4.7347	2.19382e-06	0.000216092	peak_0021872
211.227	-1.06845	0.225724	-4.73345	2.20732e-06	0.000217164	peak_0020558
358.549	0.787991	0.166543	4.73146	2.22907e-06	0.000219045	peak_0003659
47.4222	-1.11952	0.236656	-4.73056	2.23906e-06	0.000219767	peak_0021080
71.2226	-1.24516	0.263317	-4.72876	2.2589e-06	0.000221452	peak_0023036
110.37	-0.887986	0.187828	-4.72766	2.27119e-06	0.000222132	peak_0028748
106.337	0.885088	0.187206	4.72789	2.26864e-06	0.000222132	peak_0033667
50.1033	-1.06081	0.224417	-4.72693	2.27935e-06	0.000222407	peak_0053503
417.778	0.66232	0.14011	4.72714	2.27703e-06	0.000222407	peak_0068828
125.584	-0.831342	0.175888	-4.72655	2.28368e-06	0.000222568	peak_0040360
85.1561	-0.90839	0.1922	-4.72629	2.28664e-06	0.000222595	peak_0029425
115.534	-0.946529	0.200305	-4.72543	2.29634e-06	0.000223277	peak_0002036
116.661	-0.760957	0.161049	-4.72502	2.30098e-06	0.000223467	peak_0064878
29.6097	-1.62911	0.344858	-4.72401	2.31236e-06	0.00022431	peak_0075392
206.588	-1.52471	0.322784	-4.72364	2.31661e-06	0.00022446	peak_0063406
33.5727	-1.63438	0.346056	-4.72287	2.32535e-06	0.000225044	peak_0079014
159.013	0.798044	0.169131	4.71851	2.37581e-06	0.000229659	peak_0056556
146.056	0.930146	0.197152	4.7179	2.38288e-06	0.000230076	peak_0006306
31.5671	-1.4438	0.306131	-4.71627	2.40209e-06	0.000231661	peak_0056623
281.802	-0.844875	0.179167	-4.71558	2.41023e-06	0.000232176	peak_0069902
421.296	0.787446	0.167039	4.71414	2.42736e-06	0.000233556	peak_0011471
105.374	-1.65282	0.350632	-4.71383	2.43102e-06	0.000233636	peak_0017403
53.2093	-1.70078	0.360937	-4.71213	2.45139e-06	0.000235322	peak_0015700
88.9398	-0.814443	0.172939	-4.70941	2.4843e-06	0.000238206	peak_0067755
191.743	0.9752	0.207093	4.70899	2.48952e-06	0.000238431	peak_0065076
789.866	-0.778375	0.165344	-4.70762	2.50625e-06	0.000239757	peak_0026344
164.644	-0.878144	0.186568	-4.70682	2.51609e-06	0.000240421	peak_0068660
147.295	-0.736999	0.156621	-4.70563	2.53089e-06	0.000241003	peak_0014257
58.3229	-1.2907	0.274262	-4.70607	2.52544e-06	0.000241003	peak_0016278
146.83	-0.973256	0.206822	-4.70577	2.52909e-06	0.000241003	peak_0054275
397.615	-0.748459	0.159076	-4.70503	2.53825e-06	0.000241427	peak_0024068
51.3365	-1.24451	0.264685	-4.70184	2.57827e-06	0.000244953	peak_0079860
246.589	-0.931779	0.19826	-4.69979	2.60431e-06	0.000246863	peak_0063574
130.467	-0.904616	0.192475	-4.69992	2.60267e-06	0.000246863	peak_0067772
137.124	-1.13567	0.241732	-4.69804	2.62664e-06	0.000248695	peak_0033603
226.262	-1.00117	0.213116	-4.69774	2.6305e-06	0.000248777	peak_0057499
47.6726	-1.3985	0.297795	-4.69617	2.6509e-06	0.000250421	peak_0026534
201.865	-0.741717	0.157965	-4.69545	2.66017e-06	0.000250726	peak_0035921
178.485	-1.10221	0.234736	-4.69552	2.65928e-06	0.000250726	peak_0050291
229.728	-0.512076	0.109091	-4.69402	2.67888e-06	0.000252203	peak_0061398
961.405	-0.684862	0.145956	-4.69227	2.70197e-06	0.000254089	peak_0033490
14.6914	-2.04766	0.436441	-4.69171	2.70925e-06	0.000254485	peak_0070105
213.597	-1.0148	0.216318	-4.69125	2.71547e-06	0.000254782	peak_0066242
152.6	-0.883048	0.188281	-4.69004	2.73148e-06	0.000255995	peak_0001267
99.2856	-0.834779	0.178003	-4.6897	2.73608e-06	0.000256137	peak_0019028
75.378	-0.883674	0.188505	-4.68781	2.76142e-06	0.000257937	peak_0018004
138.562	-0.815317	0.173923	-4.6878	2.76153e-06	0.000257937	peak_0054377
55.7107	-1.14274	0.243911	-4.68505	2.79891e-06	0.000261136	peak_0017742
58.1471	-0.927501	0.197987	-4.68466	2.80428e-06	0.000261343	peak_0057480
134.639	0.8201	0.175092	4.68383	2.8156e-06	0.000262103	peak_0018121
259.522	-0.807798	0.172479	-4.68345	2.8208e-06	0.000262293	peak_0026239
134.155	-1.00296	0.214164	-4.68314	2.82518e-06	0.000262407	peak_0070445
501.061	-0.480412	0.102596	-4.68257	2.83296e-06	0.000262836	peak_0017599
586.338	-0.559786	0.119572	-4.6816	2.8465e-06	0.000263797	peak_0056772
169.919	-0.712242	0.152156	-4.681	2.85482e-06	0.000264273	peak_0010723
215.323	-0.736015	0.157269	-4.67997	2.8692e-06	0.000265308	peak_0058723
94.9363	0.705461	0.150775	4.6789	2.88414e-06	0.000266393	peak_0002313
168.877	0.712551	0.152337	4.67747	2.90437e-06	0.000267964	peak_0064429
37.5824	-1.1922	0.254924	-4.6767	2.91531e-06	0.000268377	peak_0016376
64.2417	-1.24059	0.265269	-4.67675	2.91458e-06	0.000268377	peak_0067735
29.44	-1.26308	0.270191	-4.67476	2.94302e-06	0.000270628	peak_0082600
1080.07	0.601967	0.128781	4.67435	2.9488e-06	0.000270859	peak_0046837
89.1972	0.760737	0.162763	4.67389	2.95554e-06	0.000271179	peak_0067053
342.113	-0.543237	0.116241	-4.67336	2.96306e-06	0.000271568	peak_0076410
472.271	0.529553	0.113337	4.67236	2.97752e-06	0.000272592	peak_0015108
39.2959	-1.34311	0.287522	-4.67131	2.99283e-06	0.000273693	peak_0053026
64.3033	-2.16661	0.463886	-4.67057	3.00371e-06	0.000274326	peak_0037277
64.7733	-1.0646	0.227946	-4.67038	3.00637e-06	0.000274326	peak_0062742
162.483	0.70497	0.150963	4.66983	3.01453e-06	0.000274769	peak_0056790
462.97	0.514112	0.110112	4.66898	3.02694e-06	0.000275598	peak_0036320
222.72	-0.87246	0.186915	-4.66769	3.04608e-06	0.000277037	peak_0024784
37.1635	-1.46418	0.313847	-4.66526	3.0823e-06	0.000279718	peak_0032529
37.0384	-1.41054	0.302343	-4.66537	3.0806e-06	0.000279718	peak_0047646
50.0425	-1.34073	0.28749	-4.66356	3.10788e-06	0.000281732	peak_0054734
428	-0.61503	0.13189	-4.66322	3.11302e-06	0.000281889	peak_0019296
57.8601	0.835821	0.179367	4.65984	3.16461e-06	0.000286042	peak_0043401
36.5921	-1.33092	0.285621	-4.65976	3.16577e-06	0.000286042	peak_0080240
54.7062	-1.04997	0.225399	-4.65829	3.18851e-06	0.000287535	peak_0032035
75.4837	-0.93414	0.200535	-4.65824	3.18922e-06	0.000287535	peak_0051825
599.893	-0.815738	0.17517	-4.65685	3.21086e-06	0.000289173	peak_0067325
38.059	-1.51718	0.325958	-4.65454	3.24701e-06	0.000292111	peak_0021036
466.551	-1.17827	0.253192	-4.65365	3.26106e-06	0.000293058	peak_0033206
268.627	-0.923372	0.198474	-4.65236	3.28153e-06	0.000294579	peak_0011112
243.751	0.689656	0.14829	4.65071	3.3079e-06	0.000296305	peak_0069594
87.9088	-1.14335	0.245843	-4.65074	3.30751e-06	0.000296305	peak_0078896
74.0241	-1.15497	0.248367	-4.65026	3.31519e-06	0.000296638	peak_0015285
110.368	-0.854653	0.183832	-4.64909	3.33401e-06	0.000298001	peak_0038239
20.7136	-1.53015	0.329368	-4.64572	3.38889e-06	0.000302581	peak_0012491
469.844	0.595126	0.128153	4.64388	3.4193e-06	0.000304968	peak_0049818
211.574	0.66823	0.14392	4.64307	3.43275e-06	0.000305839	peak_0015997
25.8592	-2.0285	0.43696	-4.6423	3.44552e-06	0.000306647	peak_0054606
53.8861	-1.2641	0.272501	-4.63887	3.50326e-06	0.000311453	peak_0068046
186.515	-1.111	0.239545	-4.63797	3.51846e-06	0.00031247	peak_0019336
183.943	-0.925996	0.199676	-4.6375	3.52645e-06	0.000312844	peak_0021590
186.459	0.50126	0.108095	4.63723	3.53106e-06	0.000312919	peak_0025194
198.104	-0.707309	0.152544	-4.63674	3.53953e-06	0.000313335	peak_0011813
66.607	-0.924344	0.199378	-4.63614	3.54976e-06	0.000313907	peak_0012644
372.788	-0.617492	0.133288	-4.63278	3.60794e-06	0.000318712	peak_0065042
36.2865	-1.64725	0.355674	-4.63134	3.63301e-06	0.000320245	peak_0012314
55.4654	-1.18999	0.256939	-4.63142	3.63168e-06	0.000320245	peak_0027861
1077.58	-0.567424	0.122529	-4.63094	3.64006e-06	0.000320526	peak_0050532
449.369	0.65343	0.141141	4.62963	3.66315e-06	0.000322217	peak_0002309
340.653	-0.757001	0.16355	-4.62855	3.68231e-06	0.00032356	peak_0069345
41.9458	-1.46405	0.316437	-4.62668	3.71572e-06	0.000326151	peak_0082106
99.796	-0.713871	0.15433	-4.62562	3.73482e-06	0.000327481	peak_0042051
258.806	-0.945922	0.204623	-4.62274	3.78697e-06	0.000331703	peak_0025789
64.566	1.0254	0.221863	4.62179	3.8044e-06	0.000332879	peak_0035613
222.15	-0.917314	0.198594	-4.61904	3.85518e-06	0.000336683	peak_0042695
38.3665	-1.52111	0.329317	-4.619	3.85598e-06	0.000336683	peak_0070421
244.829	-1.35762	0.293941	-4.61868	3.86194e-06	0.000336849	peak_0058388
127.412	-0.798746	0.173002	-4.61697	3.89387e-06	0.000339277	peak_0015707
205.886	-0.891172	0.193063	-4.61597	3.91269e-06	0.00034056	peak_0030940
816.058	-0.703247	0.15236	-4.61569	3.91801e-06	0.000340666	peak_0064800
142.642	-0.765671	0.165893	-4.61546	3.92219e-06	0.000340672	peak_0051864
85.4886	-0.918944	0.199161	-4.61409	3.94828e-06	0.000342581	peak_0035192
73.5942	1.17419	0.254529	4.61319	3.96533e-06	0.000343342	peak_0026711
37.6131	-1.15286	0.249901	-4.61325	3.96416e-06	0.000343342	peak_0047978
138.939	-0.814888	0.176754	-4.6103	4.02089e-06	0.00034779	peak_0064243
97.9384	-0.837523	0.181677	-4.60997	4.02734e-06	0.000347985	peak_0080019
271.987	-0.816642	0.17731	-4.60572	4.11047e-06	0.000354799	peak_0069439
163.682	-0.706388	0.153411	-4.60453	4.13391e-06	0.000356452	peak_0028841
44.3751	-1.03532	0.224863	-4.60424	4.13968e-06	0.000356579	peak_0062545
105.755	-0.845914	0.183765	-4.60324	4.15968e-06	0.000357931	peak_0053355
95.8603	1.00835	0.219083	4.60258	4.17286e-06	0.000358693	peak_0047885
226.085	-1.41313	0.307121	-4.6012	4.20066e-06	0.000360709	peak_0024196
197.877	0.675528	0.146835	4.60058	4.21308e-06	0.000361111	peak_0005918
50.6409	-1.1971	0.260208	-4.60054	4.21403e-06	0.000361111	peak_0014068
223.205	-0.941712	0.204797	-4.59827	4.26013e-06	0.000364685	peak_0072145
41.1461	-1.30877	0.284649	-4.59783	4.26905e-06	0.000365072	peak_0032805
126.76	-0.835308	0.181708	-4.59698	4.28666e-06	0.000366201	peak_0025115
1136.93	-0.521924	0.113561	-4.596	4.30686e-06	0.000367548	peak_0037156
265.075	-0.526136	0.114507	-4.59481	4.33146e-06	0.000369083	peak_0011299
153.235	-0.717109	0.156073	-4.5947	4.33374e-06	0.000369083	peak_0028737
162.199	-0.986329	0.214705	-4.59387	4.35103e-06	0.000370176	peak_0042803
85.3065	0.979077	0.213154	4.59329	4.36322e-06	0.000370834	peak_0015598
188.621	-0.792076	0.172478	-4.59232	4.38342e-06	0.00037217	peak_0026703
57.6346	-1.08305	0.235897	-4.59121	4.40679e-06	0.000373016	peak_0013894
132.812	0.656848	0.143066	4.59121	4.40687e-06	0.000373016	peak_0026621
127.831	-0.821007	0.178817	-4.59132	4.40452e-06	0.000373016	peak_0073613
616.815	-0.607341	0.132304	-4.5905	4.42181e-06	0.000373899	peak_0069903
186.277	-0.770542	0.1679	-4.58931	4.44723e-06	0.000375667	peak_0007558
174.681	0.55847	0.121696	4.58905	4.45261e-06	0.000375739	peak_0063184
155.169	-0.785187	0.171172	-4.58712	4.49412e-06	0.000378856	peak_0046907
157.03	-0.621073	0.135413	-4.58652	4.50696e-06	0.000379554	peak_0008124
204.985	-0.617795	0.134706	-4.58626	4.51247e-06	0.000379632	peak_0041683
174.402	0.757008	0.165072	4.58593	4.5197e-06	0.000379856	peak_0009777
46.4954	0.861469	0.187899	4.58474	4.54543e-06	0.000381632	peak_0013720
71.1383	1.05439	0.230013	4.58407	4.56008e-06	0.000381705	peak_0034254
302.325	0.755929	0.164896	4.58428	4.5555e-06	0.000381705	peak_0035728
110.267	-0.825902	0.180164	-4.58417	4.55785e-06	0.000381705	peak_0049089
57.0181	-1.15941	0.252946	-4.58361	4.57014e-06	0.000382161	peak_0044916
321.002	-0.718436	0.156754	-4.5832	4.57923e-06	0.000382536	peak_0006657
417.238	-0.543698	0.118659	-4.58203	4.60486e-06	0.00038429	peak_0036355
79.7542	-0.81383	0.177639	-4.58136	4.61951e-06	0.000385126	peak_0071017
1280.04	0.466394	0.101852	4.57912	4.66933e-06	0.000388889	peak_0029295
60.5026	-0.973938	0.212717	-4.57856	4.68182e-06	0.000389206	peak_0017236
258.735	0.654031	0.142847	4.57853	4.68251e-06	0.000389206	peak_0053617
167.699	-0.791626	0.172968	-4.57673	4.72302e-06	0.000392038	peak_0005669
40.656	-1.31244	0.286783	-4.57643	4.72975e-06	0.000392038	peak_0010280
122.982	0.765087	0.167181	4.57639	4.73074e-06	0.000392038	peak_0053485
85.134	-1.02525	0.22411	-4.57474	4.7681e-06	0.00039474	peak_0073308
160.845	-0.955598	0.208905	-4.57431	4.77788e-06	0.000395155	peak_0028401
99.269	-0.637558	0.139495	-4.57048	4.86608e-06	0.00040205	peak_0026023
581.144	0.561897	0.123052	4.56635	4.96302e-06	0.000409651	peak_0050579
56.5227	-1.42164	0.311453	-4.56455	5.00555e-06	0.000412357	peak_0010653
659.146	-0.656604	0.143849	-4.56455	5.00573e-06	0.000412357	peak_0037485
115.738	-0.923293	0.202338	-4.56312	5.03979e-06	0.000414752	peak_0052763
161.837	-1.39881	0.306568	-4.5628	5.04753e-06	0.000414977	peak_0058560
916.838	0.681127	0.149298	4.5622	5.06208e-06	0.000415762	peak_0031924
208.179	0.728338	0.159718	4.56016	5.1114e-06	0.000419397	peak_0024519
129.445	0.676199	0.148323	4.55898	5.14034e-06	0.00042094	peak_0019031
229.955	0.608367	0.133443	4.55899	5.14002e-06	0.00042094	peak_0027105
67.2351	-0.895649	0.196537	-4.55716	5.18497e-06	0.000424177	peak_0047925
92.8675	-0.787666	0.172897	-4.55568	5.22154e-06	0.000426748	peak_0075915
995.049	-0.64498	0.141614	-4.55449	5.25125e-06	0.000428754	peak_0053039
75.5044	-0.86877	0.190787	-4.5536	5.27344e-06	0.000430142	peak_0028079
282.44	-0.937949	0.205995	-4.55326	5.28216e-06	0.000430154	peak_0014592
615.971	0.477711	0.104918	4.55319	5.28394e-06	0.000430154	peak_0038421
124.273	-0.712619	0.156556	-4.55185	5.31764e-06	0.000432473	peak_0053628
386.54	0.47009	0.103283	4.55149	5.32663e-06	0.000432781	peak_0021950
664.017	-0.702855	0.154438	-4.55105	5.33797e-06	0.000433279	peak_0050350
108.957	-0.713572	0.156847	-4.54947	5.37823e-06	0.00043612	peak_0042107
24.2946	-1.63882	0.360286	-4.54867	5.39849e-06	0.000437336	peak_0001456
72.4425	0.695088	0.152831	4.54807	5.41408e-06	0.000438171	peak_0063441
112.968	-0.710237	0.156186	-4.54737	5.43214e-06	0.000439204	peak_0082085
51.5246	-1.22959	0.27041	-4.54716	5.43756e-06	0.000439215	peak_0060681
445.639	0.451298	0.0992559	4.54682	5.44636e-06	0.000439499	peak_0009775
68.0292	-1.22727	0.26998	-4.5458	5.47265e-06	0.000441191	peak_0026689
22.1791	-1.38257	0.304197	-4.54497	5.49422e-06	0.000442501	peak_0046545
192.497	-0.919944	0.202426	-4.54459	5.50415e-06	0.000442871	peak_0059275
118.792	-1.60877	0.354095	-4.54334	5.53708e-06	0.000444926	peak_0009511
114.836	0.674176	0.148392	4.54321	5.54042e-06	0.000444926	peak_0062859
318.365	0.63375	0.139508	4.54275	5.55259e-06	0.000445415	peak_0020161
315.413	0.941071	0.207167	4.54257	5.55723e-06	0.000445415	peak_0054619
26.0303	-1.64528	0.362234	-4.54203	5.57162e-06	0.000446138	peak_0021177
281.034	-0.770995	0.169806	-4.54044	5.61377e-06	0.00044908	peak_0048861
44.2815	-1.19148	0.262508	-4.53883	5.65662e-06	0.000451204	peak_0024452
240.655	0.792141	0.174524	4.53887	5.65574e-06	0.000451204	peak_0049844
315.795	-0.589511	0.12988	-4.53889	5.65511e-06	0.000451204	peak_0072639
55.2479	0.87563	0.192956	4.53797	5.67979e-06	0.000452617	peak_0008012
130.342	-0.894913	0.197232	-4.53737	5.69592e-06	0.000453467	peak_0002448
67.8677	-1.05224	0.231936	-4.53676	5.71258e-06	0.000454358	peak_0038079
428.082	-0.485085	0.106954	-4.53545	5.74807e-06	0.000456744	peak_0003453
116.067	0.633496	0.139684	4.5352	5.75481e-06	0.000456842	peak_0074246
1132.15	0.412746	0.091017	4.53483	5.76513e-06	0.000457223	peak_0024596
65.2802	-1.07949	0.238059	-4.53453	5.77319e-06	0.000457244	peak_0021384
40.3898	-1.38642	0.305755	-4.53441	5.7764e-06	0.000457244	peak_0038391
24.1172	-1.7169	0.378668	-4.53406	5.78613e-06	0.000457578	peak_0012495
145.111	-1.0206	0.225175	-4.53248	5.82959e-06	0.000460577	peak_0020441
36.529	-1.17678	0.259713	-4.53108	5.86833e-06	0.000463197	peak_0026420
88.4455	0.7343	0.162089	4.53023	5.89194e-06	0.000464618	peak_0038013
90.9297	-0.752887	0.166251	-4.52863	5.93675e-06	0.000467708	peak_0080004
92.4263	-1.2615	0.278577	-4.52835	5.9447e-06	0.00046789	peak_0026705
167.149	-0.721132	0.159376	-4.52471	6.04782e-06	0.000474266	peak_0007559
273.85	0.681232	0.150558	4.52471	6.04771e-06	0.000474266	peak_0031001
122.636	-0.746929	0.165059	-4.52523	6.03289e-06	0.000474266	peak_0042394
97.5175	-1.02161	0.225785	-4.52468	6.04856e-06	0.000474266	peak_0049566
24.6435	-1.40453	0.310433	-4.52443	6.05582e-06	0.000474388	peak_0009841
131.736	-0.809574	0.178963	-4.52371	6.07655e-06	0.000475563	peak_0022064
170.057	-0.594475	0.131435	-4.52296	6.098e-06	0.000476793	peak_0030478
272.882	-0.868676	0.19207	-4.5227	6.10568e-06	0.000476944	peak_0019539
139.794	-0.802907	0.177537	-4.52247	6.11214e-06	0.000477	peak_0050536
123.564	-0.678624	0.150064	-4.52222	6.11954e-06	0.000477129	peak_0040544
251.318	-0.988843	0.218717	-4.5211	6.15184e-06	0.000479197	peak_0042788
192.574	-0.783188	0.17334	-4.51822	6.23628e-06	0.000485101	peak_0044713
167.156	-0.809187	0.179098	-4.51811	6.23931e-06	0.000485101	peak_0075823
381.111	-0.806099	0.178499	-4.51599	6.30209e-06	0.000489524	peak_0019345
26.6848	-1.29984	0.287979	-4.51366	6.37173e-06	0.000494008	peak_0001589
308.649	-0.783593	0.173597	-4.51386	6.36585e-06	0.000494008	peak_0049153
257.535	-0.697334	0.154516	-4.51303	6.3907e-06	0.000495017	peak_0039954
150.943	-0.604515	0.133965	-4.51247	6.40776e-06	0.000495414	peak_0002855
71.5891	-1.08999	0.241543	-4.51262	6.40319e-06	0.000495414	peak_0079183
210.131	0.572063	0.126817	4.51093	6.45453e-06	0.000498566	peak_0063269
53.3473	-0.974017	0.215956	-4.51025	6.47527e-06	0.000499703	peak_0014236
52.2658	-1.16868	0.259233	-4.5082	6.53786e-06	0.000504065	peak_0017230
189.26	0.546483	0.121237	4.50756	6.5578e-06	0.000505133	peak_0025830
490.308	-0.613831	0.136207	-4.5066	6.58731e-06	0.000506936	peak_0053050
451.548	0.420582	0.0933417	4.50583	6.61133e-06	0.000508313	peak_0048293
69.7897	-1.06536	0.236468	-4.50532	6.6273e-06	0.00050907	peak_0040539
74.5983	-0.847268	0.188094	-4.5045	6.653e-06	0.000510572	peak_0058401
84.7554	-1.22869	0.272786	-4.50422	6.66161e-06	0.00051076	peak_0068569
160.598	-0.729192	0.161957	-4.50238	6.71976e-06	0.000514743	peak_0003916
25.5238	-1.46599	0.325725	-4.5007	6.77295e-06	0.00051834	peak_0003117
73.2011	-0.886609	0.197084	-4.49865	6.83877e-06	0.000522895	peak_0038996
154.196	-1.41228	0.314109	-4.49615	6.91947e-06	0.000528579	peak_0033241
303.916	-0.819889	0.18238	-4.4955	6.9406e-06	0.000529705	peak_0019104
27.9904	-1.51637	0.337677	-4.49061	7.10211e-06	0.000541038	peak_0009975
289.793	0.757559	0.168693	4.49077	7.09672e-06	0.000541038	peak_0017270
106.354	0.805638	0.179425	4.49012	7.11837e-06	0.000541779	peak_0007204
662.85	-0.584748	0.130248	-4.48951	7.13886e-06	0.000542344	peak_0011302
74.1728	-0.982471	0.218836	-4.48954	7.13776e-06	0.000542344	peak_0044206
216.8	-0.628843	0.140119	-4.48792	7.19218e-06	0.000545896	peak_0068570
41.6458	-1.36122	0.303366	-4.48707	7.22102e-06	0.000547248	peak_0079175
94.3374	-1.01134	0.225394	-4.487	7.22318e-06	0.000547248	peak_0080988
269.41	0.459455	0.10241	4.48642	7.24307e-06	0.000548254	peak_0020706
76.7181	-1.02817	0.22919	-4.48609	7.25423e-06	0.000548599	peak_0056920
126.397	-1.16124	0.258985	-4.48381	7.33219e-06	0.000553991	peak_0046643
19.0043	-1.5766	0.351722	-4.48252	7.37657e-06	0.000556837	peak_0081539
350.782	-0.727668	0.16235	-4.4821	7.39132e-06	0.000557404	peak_0035185
388.698	-0.75049	0.167448	-4.48192	7.39751e-06	0.000557404	peak_0061170
310.777	0.620285	0.138408	4.48156	7.40985e-06	0.000557828	peak_0031180
135.627	-1.47485	0.329176	-4.48043	7.44919e-06	0.000559775	peak_0019053
40.3038	-1.29737	0.289556	-4.48056	7.44473e-06	0.000559775	peak_0076439
28.0632	-1.40571	0.313804	-4.47959	7.4788e-06	0.000561491	peak_0022094
33.3738	-1.0674	0.238302	-4.47919	7.49256e-06	0.000562016	peak_0030592
149.653	-0.898687	0.200675	-4.47833	7.52293e-06	0.000563277	peak_0027843
167.498	0.811209	0.181134	4.4785	7.5171e-06	0.000563277	peak_0034631
248.546	0.861292	0.192424	4.47601	7.60526e-06	0.000568928	peak_0004249
181.225	-0.707397	0.158085	-4.47478	7.64895e-06	0.000571681	peak_0007728
84.4219	0.885717	0.197958	4.47427	7.66739e-06	0.000572544	peak_0043731
41.532	-1.06757	0.238637	-4.47362	7.69072e-06	0.00057377	peak_0006442
160.812	-0.794698	0.177696	-4.47223	7.74092e-06	0.000576997	peak_0070093
63.2702	-0.981221	0.219424	-4.4718	7.75635e-06	0.000577629	peak_0023063
422.225	0.587892	0.131486	4.47114	7.78043e-06	0.000578903	peak_0024512
30.8941	-1.39909	0.312938	-4.47081	7.79229e-06	0.000579266	peak_0032998
560.719	0.554832	0.124186	4.46775	7.90462e-06	0.000587091	peak_0024749
95.8709	-0.999525	0.223742	-4.46731	7.92096e-06	0.000587779	peak_0019532
131.032	-0.94945	0.212549	-4.46697	7.93364e-06	0.000588194	peak_0019698
160.596	-0.767297	0.171794	-4.46637	7.95566e-06	0.0005893	peak_0037448
131.718	-0.633079	0.141788	-4.46498	8.00774e-06	0.000591894	peak_0026282
435.697	0.689928	0.154524	4.46486	8.01205e-06	0.000591894	peak_0047756
78.371	-0.864207	0.193554	-4.46494	8.00904e-06	0.000591894	peak_0072521
110.424	-1.85502	0.415567	-4.46382	8.05105e-06	0.000594246	peak_0074282
82.4964	-0.769272	0.172356	-4.46327	8.07171e-06	0.000595242	peak_0016291
88.5117	-0.860737	0.192879	-4.46258	8.09789e-06	0.000596643	peak_0017851
51.1834	-1.12059	0.251124	-4.46229	8.10873e-06	0.000596912	peak_0030975
336.399	-0.634282	0.142197	-4.46058	8.17376e-06	0.000600813	peak_0018113
61.0528	0.869021	0.194834	4.46033	8.18343e-06	0.000600813	peak_0025454
61.7295	-1.08315	0.242839	-4.46035	8.18241e-06	0.000600813	peak_0052909
56.6087	-1.40465	0.314966	-4.45969	8.20792e-06	0.000602078	peak_0029053
88.0241	-1.12117	0.251434	-4.4591	8.23035e-06	0.000603191	peak_0051800
67.0287	-0.902404	0.2024	-4.45852	8.25273e-06	0.000604298	peak_0037276
106.249	-0.88025	0.197456	-4.45796	8.27427e-06	0.000605342	peak_0038985
89.516	-1.0375	0.232766	-4.45727	8.30102e-06	0.000605697	peak_0023763
27.3041	-1.48546	0.333247	-4.45755	8.29015e-06	0.000605697	peak_0032611
87.7819	-0.951176	0.213396	-4.45733	8.29868e-06	0.000605697	peak_0038183
31.7652	-1.21228	0.272018	-4.45661	8.32666e-06	0.000607034	peak_0035552
44.2856	-1.22056	0.273924	-4.45582	8.35738e-06	0.00060874	peak_0037279
102.181	-1.14729	0.257551	-4.45463	8.40364e-06	0.000611573	peak_0005196
79.1968	-1.01716	0.228372	-4.45395	8.43039e-06	0.000612982	peak_0058161
63.5683	-0.83536	0.187579	-4.45338	8.45299e-06	0.000614088	peak_0003260
23.1643	-1.52431	0.342328	-4.45279	8.47617e-06	0.000615233	peak_0058289
39.8285	-1.3839	0.310814	-4.45249	8.48797e-06	0.000615552	peak_0081308
117.468	-0.95002	0.213389	-4.45205	8.50534e-06	0.000616273	peak_0018718
90.4384	-0.94986	0.213372	-4.45167	8.52051e-06	0.000616297	peak_0033015
145.241	-0.938419	0.210795	-4.4518	8.51533e-06	0.000616297	peak_0058164
212.884	-1.29925	0.291901	-4.45099	8.54762e-06	0.00061772	peak_0010373
223.05	-0.767518	0.17245	-4.45066	8.56064e-06	0.000618123	peak_0064458
155.095	-0.681595	0.153232	-4.44814	8.66184e-06	0.000624887	peak_0077465
198.861	0.874527	0.196627	4.44763	8.68212e-06	0.000625806	peak_0065268
276.294	-0.636906	0.143222	-4.44697	8.70905e-06	0.000627202	peak_0010311
215.999	-0.625337	0.140658	-4.44578	8.75721e-06	0.000629913	peak_0032441
216.373	-0.784127	0.17638	-4.44567	8.76185e-06	0.000629913	peak_0058919
100.704	0.75447	0.169746	4.44469	8.80193e-06	0.000632247	peak_0067043
154.595	-0.790292	0.177828	-4.44414	8.82429e-06	0.000633305	peak_0008916
321.592	-0.519979	0.11701	-4.44388	8.83506e-06	0.000633531	peak_0040686
42.0625	-1.3078	0.294405	-4.4422	8.90448e-06	0.000637858	peak_0060680
65.6855	-0.92893	0.209122	-4.44205	8.91077e-06	0.000637858	peak_0081345
18.3668	1.54751	0.348469	4.44088	8.95938e-06	0.000640709	peak_0034552
95.5432	-0.953198	0.21465	-4.44072	8.96604e-06	0.000640709	peak_0079544
402.116	0.652604	0.146993	4.43971	9.00802e-06	0.000643156	peak_0042042
92.7053	-0.900634	0.202893	-4.43896	9.03956e-06	0.0006443	peak_0062452
217.029	0.849642	0.191404	4.439	9.0379e-06	0.0006443	peak_0082227
136.29	-0.998598	0.224984	-4.43853	9.05744e-06	0.00064502	peak_0055266
113.307	0.86622	0.195195	4.43772	9.09151e-06	0.000646892	peak_0033274
470.55	-0.544821	0.122804	-4.43649	9.1436e-06	0.000650041	peak_0070023
57.8557	-1.19894	0.270263	-4.4362	9.15613e-06	0.000650375	peak_0025570
561.657	-0.634135	0.142994	-4.4347	9.21997e-06	0.000653814	peak_0012343
81.1243	-0.888406	0.200331	-4.43469	9.22029e-06	0.000653814	peak_0048480
100.403	-1.24996	0.281873	-4.43448	9.22931e-06	0.000653895	peak_0079720
131.918	-0.796357	0.179628	-4.43336	9.27762e-06	0.000656757	peak_0029300
81.9879	0.958884	0.216341	4.43229	9.32391e-06	0.000659472	peak_0040825
501.087	0.518566	0.117003	4.43209	9.33244e-06	0.000659513	peak_0080265
95.7646	-0.757954	0.171033	-4.43162	9.35281e-06	0.000660391	peak_0051781
138.623	-0.569094	0.128441	-4.43079	9.38876e-06	0.000662366	peak_0065196
151.669	-0.725954	0.16386	-4.43033	9.40895e-06	0.000663227	peak_0067270
224.496	-0.599585	0.135391	-4.42853	9.48775e-06	0.000668214	peak_0052765
139.92	-0.709948	0.160321	-4.42828	9.49854e-06	0.000668407	peak_0053305
89.128	-1.1744	0.265367	-4.42557	9.61874e-06	0.000676293	peak_0080929
167.184	-0.615742	0.139142	-4.42527	9.63204e-06	0.000676655	peak_0021311
441.782	-0.518513	0.117204	-4.42403	9.6875e-06	0.000679975	peak_0039122
28.333	-1.31605	0.297524	-4.42333	9.71905e-06	0.000681614	peak_0071415
109.034	0.715084	0.161697	4.42238	9.76211e-06	0.000684056	peak_0009844
33.4931	-1.25317	0.283415	-4.42167	9.79424e-06	0.000685729	peak_0045664
427.13	-0.636537	0.143965	-4.42146	9.80348e-06	0.000685797	peak_0080033
199.521	-0.582457	0.131767	-4.42035	9.85425e-06	0.000688769	peak_0031440
295.76	-0.556333	0.125867	-4.42001	9.8697e-06	0.000689269	peak_0007543
20.3912	-1.62939	0.368703	-4.41926	9.90379e-06	0.000689637	peak_0027687
125.395	0.804482	0.182052	4.41896	9.91775e-06	0.000689637	peak_0030334
306.01	-0.625343	0.141519	-4.41881	9.92481e-06	0.000689637	peak_0044668
60.2507	-0.934087	0.211361	-4.41938	9.89825e-06	0.000689637	peak_0068628
595.39	0.579965	0.131243	4.41901	9.91528e-06	0.000689637	peak_0075089
295.68	-0.675652	0.1529	-4.41892	9.91953e-06	0.000689637	peak_0080249
46.3026	-1.1533	0.261009	-4.41861	9.93381e-06	0.000689685	peak_0011324
108.274	0.645111	0.146007	4.41835	9.94587e-06	0.000689946	peak_0070528
851.907	0.707937	0.160263	4.41733	9.99256e-06	0.000692197	peak_0018913
44.9305	1.14632	0.259508	4.41728	9.995e-06	0.000692197	peak_0035830
108.711	-0.706517	0.159997	-4.41582	1.00629e-05	0.000696317	peak_0055604
422.406	0.590253	0.133689	4.41512	1.00953e-05	0.000697977	peak_0048238
230.453	-0.795441	0.180204	-4.41412	1.01423e-05	0.00070006	peak_0011089
80.3645	0.93705	0.212276	4.41429	1.01341e-05	0.00070006	peak_0033342
80.9278	-0.897001	0.203232	-4.41368	1.01627e-05	0.00070089	peak_0068761
464.828	0.784755	0.17782	4.41321	1.01851e-05	0.000701853	peak_0040784
66.6201	-0.900989	0.204297	-4.4102	1.03275e-05	0.000711074	peak_0010597
432.792	0.434983	0.0986512	4.4093	1.03705e-05	0.000713444	peak_0072883
20.3102	-1.60512	0.364135	-4.40803	1.04314e-05	0.000717036	peak_0055711
190.076	0.619671	0.140623	4.40662	1.04994e-05	0.000721118	peak_0022967
151.761	0.763952	0.173415	4.40534	1.05618e-05	0.000724804	peak_0046667
30.1156	-1.30781	0.296904	-4.40484	1.05861e-05	0.000725867	peak_0027674
293.353	-0.45426	0.103133	-4.40459	1.05983e-05	0.000726103	peak_0048087
46.4828	1.13146	0.256933	4.4037	1.06418e-05	0.000728486	peak_0067119
151.75	-0.833838	0.189372	-4.40318	1.06676e-05	0.000729498	peak_0006986
257.642	0.450418	0.102297	4.40305	1.06742e-05	0.000729498	peak_0037577
18.8767	-1.43793	0.326631	-4.4023	1.07107e-05	0.000731393	peak_0007212
98.3222	-0.709417	0.161181	-4.40137	1.0757e-05	0.000733951	peak_0038057
189.833	-0.753601	0.171233	-4.40103	1.07736e-05	0.000734482	peak_0080018
1081.01	0.65398	0.148617	4.40045	1.08028e-05	0.000734663	peak_0005058
16.7492	-1.6736	0.380304	-4.40068	1.07911e-05	0.000734663	peak_0019168
12.8414	-1.92561	0.437586	-4.40054	1.07982e-05	0.000734663	peak_0077580
49.7717	-0.900331	0.204665	-4.39905	1.08727e-05	0.000738806	peak_0075849
197.271	-0.64853	0.147615	-4.39338	1.11601e-05	0.0007571	peak_0003515
24.5586	-1.23152	0.280309	-4.39343	1.11575e-05	0.0007571	peak_0009223
44.3871	1.03205	0.23493	4.393	1.11795e-05	0.000757797	peak_0014046
239.242	-0.773609	0.176166	-4.39138	1.12635e-05	0.000761063	peak_0016365
392.398	-0.6437	0.146579	-4.39148	1.12583e-05	0.000761063	peak_0034450
92.6112	-0.714014	0.162595	-4.39136	1.12643e-05	0.000761063	peak_0054886
267.296	-0.591163	0.134609	-4.3917	1.12466e-05	0.000761063	peak_0073967
87.8178	-0.66651	0.151784	-4.39116	1.12746e-05	0.000761135	peak_0051558
80.9406	-0.957317	0.218059	-4.39017	1.13262e-05	0.000764001	peak_0022831
64.7061	-0.99636	0.226973	-4.38977	1.13473e-05	0.000764802	peak_0025788
32.3029	-1.23885	0.282235	-4.38943	1.1365e-05	0.000765373	peak_0044834
198.991	0.795227	0.18119	4.38891	1.13922e-05	0.000766583	peak_0079525
150.646	-0.679548	0.154843	-4.38863	1.14066e-05	0.000766928	peak_0045515
127.179	-0.848743	0.193487	-4.38657	1.1515e-05	0.000773595	peak_0039119
298.604	-0.885401	0.201874	-4.38592	1.15497e-05	0.000775296	peak_0061190
47.3349	-1.69977	0.387601	-4.38537	1.15787e-05	0.000776616	peak_0002113
145.441	0.667071	0.152132	4.38482	1.16084e-05	0.000777351	peak_0001288
303.24	-0.622991	0.142077	-4.38488	1.16049e-05	0.000777351	peak_0047307
277.372	-0.864893	0.197257	-4.3846	1.16201e-05	0.000777508	peak_0061284
62.9752	-1.0858	0.247669	-4.38406	1.1649e-05	0.000778185	peak_0017421
112.562	-0.738418	0.168432	-4.38407	1.16484e-05	0.000778185	peak_0033871
102.468	-0.836719	0.190892	-4.38321	1.16943e-05	0.000780586	peak_0056488
94.8687	-1.08357	0.247254	-4.38239	1.17382e-05	0.000782887	peak_0063746
578.593	-0.541647	0.12363	-4.3812	1.18027e-05	0.000786556	peak_0032628
74.5238	-0.855148	0.1952	-4.38087	1.18205e-05	0.000786873	peak_0023801
63.9163	-1.12178	0.256069	-4.38076	1.18264e-05	0.000786873	peak_0064278
84.044	-0.822253	0.187713	-4.38036	1.18483e-05	0.000787126	peak_0041189
35.0867	-1.50828	0.34433	-4.38034	1.18492e-05	0.000787126	peak_0060590
52.1299	-1.33127	0.304002	-4.37916	1.19137e-05	0.000790477	peak_0064564
41.4628	-1.35147	0.308624	-4.37902	1.19215e-05	0.000790477	peak_0079401
30.3613	-1.50602	0.343926	-4.3789	1.19282e-05	0.000790477	peak_0080015
107.371	-0.807259	0.184365	-4.37859	1.19448e-05	0.000790946	peak_0017852
56.5442	0.830201	0.189643	4.37769	1.19942e-05	0.000793024	peak_0066794
33.2286	-1.4261	0.325766	-4.37767	1.19953e-05	0.000793024	peak_0081193
174.23	-0.476507	0.108905	-4.37544	1.21187e-05	0.000800451	peak_0017040
64.3609	-1.00602	0.22995	-4.37495	1.21462e-05	0.000800451	peak_0026835
51.5251	-1.18994	0.271985	-4.37502	1.21422e-05	0.000800451	peak_0032469
75.4525	-1.0969	0.250722	-4.37498	1.21444e-05	0.000800451	peak_0064811
313.733	-0.925861	0.211639	-4.37472	1.21586e-05	0.000800636	peak_0038799
38.4206	-1.48629	0.339774	-4.37436	1.21791e-05	0.000801352	peak_0071090
254.174	-0.699931	0.160066	-4.37276	1.22688e-05	0.000806611	peak_0049049
313.081	-0.668923	0.153003	-4.37196	1.23137e-05	0.000808927	peak_0067170
42.2839	-1.24228	0.284174	-4.37154	1.23374e-05	0.00080984	peak_0025915
40.524	-1.28456	0.293863	-4.3713	1.2351e-05	0.00081009	peak_0034283
72.6545	-0.883197	0.202066	-4.37084	1.2377e-05	0.00081116	peak_0048841
17.3242	-1.50065	0.343347	-4.37066	1.2387e-05	0.000811174	peak_0025919
15.67	-2.0104	0.460026	-4.3702	1.24132e-05	0.000812249	peak_0032956
105.69	-0.828134	0.189537	-4.36924	1.24678e-05	0.000815178	peak_0004615
72.6955	-0.870509	0.199246	-4.36901	1.24809e-05	0.00081539	peak_0053620
157.897	-0.855112	0.195764	-4.36807	1.2535e-05	0.000817643	peak_0072274
117.905	-0.665566	0.15237	-4.3681	1.25333e-05	0.000817643	peak_0081323
222.987	0.681674	0.156079	4.36751	1.25673e-05	0.000819107	peak_0021867
285.192	0.650974	0.149057	4.36729	1.25796e-05	0.000819262	peak_0051554
341.239	-0.707653	0.162042	-4.3671	1.25908e-05	0.000819349	peak_0030074
450.826	-0.550905	0.126174	-4.36624	1.26405e-05	0.00082194	peak_0056768
294.536	0.564466	0.129308	4.36529	1.26954e-05	0.000824866	peak_0047503
165.297	0.732949	0.167959	4.36387	1.27782e-05	0.000829594	peak_0002712
836.422	0.451593	0.103492	4.36357	1.27955e-05	0.00083007	peak_0076215
97.0557	-1.6732	0.383578	-4.36208	1.28831e-05	0.000835101	peak_0063073
93.0307	0.854154	0.195874	4.36073	1.29629e-05	0.000839617	peak_0052380
122.112	-0.643745	0.147643	-4.36015	1.29973e-05	0.000841186	peak_0080780
72.4099	-0.928448	0.212979	-4.35934	1.30458e-05	0.000843669	peak_0036451
58.7009	-0.888981	0.203984	-4.35809	1.31201e-05	0.000847813	peak_0068830
53.4057	-1.2246	0.281025	-4.35764	1.31474e-05	0.000848916	peak_0061964
88.0624	1.0161	0.233223	4.35676	1.32e-05	0.00085165	peak_0005167
129.833	-0.712514	0.163555	-4.35641	1.32213e-05	0.000852364	peak_0031959
167.388	-0.64551	0.148218	-4.35514	1.32981e-05	0.000856649	peak_0074529
67.9952	-1.30506	0.2997	-4.35457	1.33328e-05	0.000858217	peak_0003375
256.491	0.58372	0.134096	4.353	1.34289e-05	0.000863734	peak_0054410
153.749	-0.868608	0.199588	-4.35202	1.34891e-05	0.000866455	peak_0050627
74.6223	-1.1723	0.269371	-4.35197	1.34921e-05	0.000866455	peak_0065977
257.858	-0.679493	0.15616	-4.35127	1.35353e-05	0.00086856	peak_0025025
159.801	-0.696988	0.160199	-4.35077	1.35659e-05	0.000869852	peak_0010076
22.6907	-1.40833	0.323822	-4.34907	1.36715e-05	0.000875272	peak_0009464
202.671	-0.766299	0.176198	-4.34908	1.36711e-05	0.000875272	peak_0024806
118.75	-1.00154	0.23031	-4.34865	1.36976e-05	0.000876241	peak_0020085
85.0107	1.20143	0.276287	4.34849	1.37078e-05	0.000876241	peak_0070921
71.4203	0.813491	0.187101	4.34788	1.3746e-05	0.00087801	peak_0037220
185.666	-0.886821	0.203992	-4.34733	1.37807e-05	0.000878877	peak_0052684
304.252	-0.815017	0.187471	-4.34743	1.37745e-05	0.000878877	peak_0079211
150.566	-0.825511	0.189904	-4.34699	1.38018e-05	0.000879069	peak_0036717
390.216	0.611053	0.140571	4.34694	1.38049e-05	0.000879069	peak_0050305
34.1413	-1.03696	0.238571	-4.34653	1.38309e-05	0.000880048	peak_0081362
291.684	-0.66793	0.153694	-4.34585	1.3874e-05	0.000881695	peak_0033648
476.923	-0.773709	0.178037	-4.34578	1.3878e-05	0.000881695	peak_0040031
166.011	-0.603408	0.138914	-4.34376	1.40067e-05	0.000889191	peak_0036156
50.7604	-0.98724	0.227387	-4.34167	1.41406e-05	0.000897002	peak_0015939
85.3034	0.924824	0.213087	4.34012	1.42402e-05	0.000902276	peak_0036008
116.474	0.744018	0.171431	4.34004	1.42454e-05	0.000902276	peak_0049838
43.0465	-1.19752	0.275952	-4.3396	1.42741e-05	0.000903403	peak_0050908
96.3391	-0.75265	0.173472	-4.33874	1.43302e-05	0.000906265	peak_0064743
82.6623	-0.859518	0.198118	-4.33843	1.43507e-05	0.00090687	peak_0003230
210.398	0.739184	0.170414	4.33757	1.44068e-05	0.00090972	peak_0031083
121.944	0.796321	0.183618	4.33684	1.44548e-05	0.000911363	peak_0049672
201.516	-0.700432	0.161506	-4.33689	1.44516e-05	0.000911363	peak_0068801
202.76	-1.0182	0.234841	-4.33571	1.45293e-05	0.00091537	peak_0059978
214.427	-0.839774	0.193728	-4.33482	1.45882e-05	0.000918382	peak_0000603
56.104	-0.837686	0.193339	-4.33272	1.47276e-05	0.000926457	peak_0064313
357.625	0.634771	0.146513	4.33252	1.47411e-05	0.000926604	peak_0051190
65.8872	-1.10168	0.254313	-4.33201	1.47757e-05	0.000928078	peak_0061775
243.124	0.792116	0.182861	4.33179	1.47901e-05	0.00092828	peak_0068958
62.8595	-1.01594	0.234563	-4.33122	1.48287e-05	0.000929995	peak_0047559
74.5338	-0.838549	0.193613	-4.33105	1.484e-05	0.000930001	peak_0076651
117.005	-0.64651	0.149284	-4.33074	1.48607e-05	0.000930597	peak_0027410
696.536	-0.552673	0.127629	-4.3303	1.48905e-05	0.000931364	peak_0066051
207.36	-0.532374	0.122944	-4.33023	1.48954e-05	0.000931364	peak_0077432
441.476	-0.649176	0.149981	-4.3284	1.50195e-05	0.000938421	peak_0010826
172.911	-0.746129	0.172493	-4.32555	1.52149e-05	0.000949911	peak_0035894
229.711	0.516602	0.119502	4.32297	1.53943e-05	0.000958946	peak_0000166
62.9747	-1.43477	0.331911	-4.32277	1.54079e-05	0.000958946	peak_0007564
110.089	1.01289	0.234289	4.32325	1.53747e-05	0.000958946	peak_0034243
199.322	0.853832	0.197503	4.32313	1.5383e-05	0.000958946	peak_0049658
73.4008	-1.00573	0.232665	-4.32264	1.54173e-05	0.000958946	peak_0065134
60.2906	-0.848769	0.196381	-4.32205	1.54584e-05	0.000960784	peak_0073333
532.503	-0.726158	0.168057	-4.3209	1.55396e-05	0.000964465	peak_0032066
15.068	-1.7415	0.403044	-4.32088	1.55409e-05	0.000964465	peak_0071422
153.667	-0.831778	0.192511	-4.32069	1.55545e-05	0.000964591	peak_0076036
1090.02	0.488705	0.113151	4.31906	1.56692e-05	0.000970977	peak_0037373
644.626	0.686009	0.158876	4.3179	1.57524e-05	0.000975404	peak_0042488
97.1487	-0.85665	0.198433	-4.31708	1.58105e-05	0.000978272	peak_0031018
38.61	-1.08529	0.251438	-4.31634	1.58641e-05	0.000980858	peak_0058840
157.349	-0.831625	0.192686	-4.31596	1.5891e-05	0.000981792	peak_0031896
129.072	0.876996	0.203344	4.31286	1.61153e-05	0.000994908	peak_0033853
190.653	-0.66248	0.153613	-4.31264	1.61315e-05	0.000995166	peak_0059491
57.6588	-0.877422	0.203508	-4.3115	1.62152e-05	0.000998844	peak_0003490
149.581	-0.785359	0.182154	-4.31152	1.62138e-05	0.000998844	peak_0066128
320.494	0.47643	0.11055	4.30961	1.6354e-05	0.00100665	peak_0031931
52.9119	-1.11926	0.259815	-4.30792	1.64794e-05	0.00101362	peak_0025699
40.764	-1.1174	0.259402	-4.30762	1.65018e-05	0.00101424	peak_0057568
35.227	-1.07195	0.248866	-4.30733	1.65236e-05	0.00101483	peak_0037247
168.501	-0.771405	0.179107	-4.30695	1.65517e-05	0.00101581	peak_0069399
175.454	0.652687	0.151566	4.30629	1.66018e-05	0.00101813	peak_0071012
202.352	-0.767925	0.1784	-4.30451	1.67354e-05	0.00102481	peak_0003823
93.2528	-0.8017	0.186246	-4.30453	1.67344e-05	0.00102481	peak_0077853
366.446	-0.658679	0.153027	-4.30432	1.67499e-05	0.00102494	peak_0026279
36.1841	-1.53556	0.356781	-4.30392	1.67802e-05	0.00102604	peak_0025722
87.7362	-0.916801	0.213051	-4.30319	1.68355e-05	0.00102866	peak_0006855
276.139	-0.566486	0.131664	-4.30253	1.68859e-05	0.00103099	peak_0031782
49.1511	-1.02604	0.23859	-4.30041	1.70484e-05	0.00104014	peak_0056202
44.0065	-1.13626	0.264275	-4.29954	1.7115e-05	0.00104344	peak_0058237
109.821	-0.935733	0.217666	-4.29894	1.71615e-05	0.00104465	peak_0003715
140.775	-0.576862	0.134193	-4.29874	1.71773e-05	0.00104465	peak_0037310
88.728	-1.04189	0.242355	-4.29901	1.71566e-05	0.00104465	peak_0064817
67.8103	-1.09119	0.253847	-4.29864	1.71852e-05	0.00104465	peak_0081790
68.1599	-0.963001	0.224064	-4.29789	1.72433e-05	0.00104741	peak_0058616
567.695	-0.597266	0.138989	-4.29722	1.72955e-05	0.00104865	peak_0012101
518.194	-0.579195	0.134786	-4.29714	1.73015e-05	0.00104865	peak_0015163
39.2555	1.3139	0.305742	4.29741	1.72803e-05	0.00104865	peak_0064427
225.35	-0.621498	0.144657	-4.29634	1.7364e-05	0.00105167	peak_0056459
57.5582	0.845443	0.196822	4.29547	1.74323e-05	0.00105504	peak_0072429
87.1528	-1.10597	0.257558	-4.29407	1.75428e-05	0.00106095	peak_0023753
513.696	0.46449	0.108185	4.29348	1.75891e-05	0.00106298	peak_0049058
632.795	-0.354048	0.0824955	-4.29173	1.7729e-05	0.00107065	peak_0017336
39.2183	-1.12566	0.262367	-4.29042	1.78336e-05	0.00107559	peak_0013842
101.43	-1.06053	0.247188	-4.29038	1.78367e-05	0.00107559	peak_0054436
250.603	0.612652	0.142818	4.28974	1.78879e-05	0.0010779	peak_0018765
18.5758	-1.69766	0.395897	-4.28814	1.80176e-05	0.00108493	peak_0001585
186.444	-0.927688	0.216359	-4.28773	1.80505e-05	0.00108612	peak_0001737
46.0853	-1.00875	0.235329	-4.28655	1.81465e-05	0.00109111	peak_0005875
191.454	0.860595	0.200816	4.28548	1.82342e-05	0.00109559	peak_0019462
124	-0.67045	0.156468	-4.28489	1.8283e-05	0.00109772	peak_0027682
292.456	-0.632316	0.147578	-4.28462	1.83055e-05	0.00109828	peak_0044175
561.69	0.609327	0.142228	4.28416	1.83432e-05	0.00109974	peak_0035838
36.234	-0.956393	0.223275	-4.28347	1.83999e-05	0.00110235	peak_0033908
36.6518	-1.23104	0.287405	-4.28331	1.84133e-05	0.00110235	peak_0061798
93.7583	1.09047	0.25461	4.28293	1.84452e-05	0.00110296	peak_0009243
110.881	1.02036	0.238243	4.28287	1.845e-05	0.00110296	peak_0032257
16.6653	1.53594	0.358884	4.27975	1.87105e-05	0.00111773	peak_0044105
11.7276	1.68439	0.393601	4.27942	1.87381e-05	0.00111857	peak_0044357
28.4413	-1.65362	0.386656	-4.27672	1.89665e-05	0.00113139	peak_0026743
52.1086	-1.09469	0.25598	-4.27647	1.89883e-05	0.00113188	peak_0043003
86.8912	-0.71535	0.167311	-4.27557	1.90649e-05	0.00113401	peak_0002350
241.489	-0.811611	0.189813	-4.27586	1.90404e-05	0.00113401	peak_0004747
435.729	-0.420684	0.0983921	-4.27559	1.90635e-05	0.00113401	peak_0079280
140.537	-0.869572	0.203537	-4.2723	1.9347e-05	0.00114996	peak_0025195
336.062	-0.611414	0.14312	-4.27204	1.9369e-05	0.00115045	peak_0005925
57.0301	0.752854	0.176247	4.27157	1.941e-05	0.00115206	peak_0012139
15.0587	1.74608	0.40879	4.27134	1.94303e-05	0.00115244	peak_0025844
251.912	0.641127	0.150131	4.27046	1.9507e-05	0.00115616	peak_0078477
155.186	-0.745997	0.174715	-4.26981	1.95644e-05	0.00115874	peak_0039378
125.34	-0.778209	0.18229	-4.26907	1.96286e-05	0.00116171	peak_0013899
212.237	-0.69281	0.162316	-4.26827	1.96991e-05	0.00116505	peak_0026276
60.3427	-1.1421	0.267598	-4.26798	1.97249e-05	0.00116575	peak_0071619
104.995	-0.76726	0.179798	-4.26734	1.97819e-05	0.00116828	peak_0049455
84.337	-0.759184	0.177921	-4.26698	1.98139e-05	0.00116935	peak_0026481
186.604	-0.892491	0.20926	-4.26499	1.99913e-05	0.00117898	peak_0005641
185.278	-0.796391	0.186746	-4.26457	2.00286e-05	0.00118034	peak_0064486
114.901	-1.79565	0.421241	-4.26277	2.01908e-05	0.00118905	peak_0064490
524.214	-0.505765	0.11866	-4.26231	2.02321e-05	0.00119064	peak_0053558
216.468	-0.907845	0.213056	-4.26106	2.03455e-05	0.00119647	peak_0051507
138.185	-0.630635	0.14803	-4.26018	2.04263e-05	0.00120037	peak_0049778
114.97	0.547371	0.128539	4.25839	2.059e-05	0.00120908	peak_0045284
106.146	-0.989589	0.232394	-4.25825	2.06036e-05	0.00120908	peak_0064485
203.961	-0.909674	0.21364	-4.25798	2.06283e-05	0.00120967	peak_0054262
145.565	0.618785	0.14534	4.2575	2.06722e-05	0.00121139	peak_0028210
189.179	-0.549394	0.12905	-4.25723	2.06974e-05	0.00121201	peak_0006688
156.856	0.679967	0.159807	4.25494	2.09106e-05	0.00122363	peak_0076372
353.702	-0.820442	0.192859	-4.25409	2.09896e-05	0.00122739	peak_0002387
97.8117	0.688195	0.161864	4.2517	2.12153e-05	0.00123884	peak_0049655
144.866	-0.72975	0.171636	-4.25173	2.12121e-05	0.00123884	peak_0073531
50.111	-0.991591	0.233385	-4.24874	2.14981e-05	0.00125447	peak_0003458
184.511	-0.609124	0.143376	-4.24844	2.15269e-05	0.00125527	peak_0077031
210.828	-0.564123	0.132808	-4.24766	2.16013e-05	0.00125873	peak_0043630
68.2523	-1.26008	0.29672	-4.2467	2.16939e-05	0.00126324	peak_0006786
93.5125	-0.649119	0.152867	-4.2463	2.1733e-05	0.00126463	peak_0075638
107.776	-1.03644	0.244094	-4.24607	2.17551e-05	0.00126502	peak_0047826
558.857	0.626602	0.147584	4.24574	2.17875e-05	0.00126602	peak_0030562
84.9112	-0.9269	0.21833	-4.24541	2.18194e-05	0.00126699	peak_0051784
413.197	-0.530398	0.124956	-4.24468	2.18903e-05	0.00127022	peak_0047087
408.927	0.851903	0.20071	4.24445	2.19132e-05	0.00127066	peak_0056558
18.1704	-1.34434	0.316752	-4.24414	2.19431e-05	0.00127151	peak_0074224
44.9129	-1.08269	0.255149	-4.24335	2.20203e-05	0.00127509	peak_0077868
150.777	-0.71054	0.167484	-4.24243	2.21111e-05	0.00127945	peak_0058679
139.097	-0.543807	0.128203	-4.24178	2.21759e-05	0.00128195	peak_0006558
440.713	-0.451746	0.106502	-4.24168	2.21852e-05	0.00128195	peak_0074330
189.67	-0.666076	0.157048	-4.24123	2.22296e-05	0.00128363	peak_0008281
132.583	-0.862377	0.203368	-4.24048	2.23038e-05	0.00128702	peak_0069441
73.849	0.737166	0.173866	4.23985	2.23667e-05	0.00128975	peak_0050580
174.192	-0.739825	0.174509	-4.23948	2.24041e-05	0.00129101	peak_0076641
1145.75	-0.663657	0.156554	-4.23915	2.24367e-05	0.00129199	peak_0040613
37.2539	-1.21005	0.285504	-4.23829	2.25228e-05	0.00129605	peak_0064253
363.978	-0.621934	0.146782	-4.23714	2.26389e-05	0.00130165	peak_0009501
77.7333	-0.855732	0.201966	-4.23701	2.26514e-05	0.00130165	peak_0061369
204.406	-0.718693	0.169672	-4.23577	2.27765e-05	0.00130623	peak_0015850
130.775	-0.548142	0.129408	-4.23576	2.27783e-05	0.00130623	peak_0035395
550.666	0.500952	0.118261	4.23597	2.2757e-05	0.00130623	peak_0069042
124.898	-0.656162	0.154934	-4.2351	2.2845e-05	0.00130915	peak_0045681
233.369	-0.585455	0.138245	-4.2349	2.28653e-05	0.00130941	peak_0002850
269.144	0.914952	0.216162	4.23272	2.30886e-05	0.00132037	peak_0033820
378.349	0.495313	0.117018	4.23278	2.30822e-05	0.00132037	peak_0041320
262.773	-0.689478	0.162907	-4.23235	2.31261e-05	0.0013207	peak_0022969
72.442	-1.17949	0.278679	-4.23241	2.31201e-05	0.0013207	peak_0078071
147.801	0.705606	0.166749	4.23154	2.32097e-05	0.00132457	peak_0030185
68.5494	-0.945945	0.223567	-4.23115	2.32498e-05	0.00132503	peak_0004679
395.473	0.460992	0.108949	4.23127	2.32379e-05	0.00132503	peak_0079662
346.599	0.645158	0.152511	4.23023	2.33454e-05	0.00132957	peak_0066693
407.277	-0.621356	0.146921	-4.22918	2.34549e-05	0.00133489	peak_0034802
373.536	0.590681	0.139698	4.22828	2.35488e-05	0.00133891	peak_0046833
28.7904	-1.38129	0.326687	-4.22819	2.35578e-05	0.00133891	peak_0074908
86.2681	-0.785217	0.185734	-4.22764	2.36156e-05	0.00134127	peak_0000767
19.2004	-1.28529	0.304087	-4.22671	2.37128e-05	0.00134588	peak_0045501
106.267	1.07336	0.253991	4.22596	2.37927e-05	0.00134867	peak_0039986
244.464	0.581823	0.137679	4.22594	2.37946e-05	0.00134867	peak_0068573
371.665	-0.544662	0.128964	-4.22336	2.40691e-05	0.0013633	peak_0011282
26.9308	-1.30514	0.309076	-4.22272	2.41374e-05	0.00136531	peak_0022135
68.8896	-0.818561	0.193841	-4.22285	2.41232e-05	0.00136531	peak_0067193
66.9711	-0.864198	0.204667	-4.22245	2.41658e-05	0.00136598	peak_0036054
99.4124	1.13575	0.269013	4.2219	2.42253e-05	0.00136841	peak_0037792
280.19	0.716168	0.169653	4.22136	2.42829e-05	0.00137074	peak_0078502
246.528	-0.640283	0.151703	-4.22063	2.43626e-05	0.0013743	peak_0059576
366.061	0.580302	0.137497	4.22047	2.43791e-05	0.0013743	peak_0006751
332.44	0.702922	0.166614	4.21888	2.45522e-05	0.00138312	peak_0076098
126.673	0.699267	0.165772	4.21825	2.46206e-05	0.00138603	peak_0018976
165.654	0.550055	0.130429	4.21726	2.47284e-05	0.00139116	peak_0076964
156.23	-0.820582	0.194633	-4.21605	2.4862e-05	0.00139773	peak_0043059
154.307	-0.721702	0.171215	-4.21517	2.49594e-05	0.00140225	peak_0042745
296.558	-0.622865	0.147786	-4.21463	2.5019e-05	0.00140465	peak_0003957
373.796	0.692803	0.164393	4.21432	2.50534e-05	0.00140563	peak_0054242
209.848	0.795237	0.188737	4.21347	2.51479e-05	0.00140998	peak_0066900
500.17	-0.768389	0.182399	-4.21268	2.52362e-05	0.00141398	peak_0017871
181.056	-1.22936	0.291908	-4.21146	2.53724e-05	0.00142065	peak_0072271
76.8522	-1.04144	0.247316	-4.21098	2.5427e-05	0.00142274	peak_0052690
98.2834	-0.863406	0.205087	-4.20995	2.55423e-05	0.00142823	peak_0025437
143.308	-0.62705	0.148963	-4.20942	2.56027e-05	0.00143065	peak_0015313
237.432	0.632865	0.150372	4.20865	2.56902e-05	0.00143458	peak_0056786
632.401	-0.716032	0.170176	-4.20759	2.58104e-05	0.00144032	peak_0027773
104.149	-0.749877	0.178269	-4.20643	2.59431e-05	0.00144675	peak_0000548
81.382	-0.759201	0.180507	-4.20595	2.59993e-05	0.00144891	peak_0065537
132.631	-0.888243	0.21129	-4.2039	2.62355e-05	0.0014611	peak_0074456
283.726	0.493755	0.117459	4.20364	2.62658e-05	0.0014618	peak_0020005
253.483	-0.559122	0.133068	-4.20176	2.64845e-05	0.001472	peak_0015840
86.3482	-0.875416	0.208338	-4.2019	2.64684e-05	0.001472	peak_0055281
1049.38	-0.589675	0.140361	-4.20114	2.65571e-05	0.00147505	peak_0024621
313.161	-0.56161	0.133692	-4.20076	2.66019e-05	0.00147655	peak_0054273
81.0947	0.706261	0.168135	4.20057	2.66243e-05	0.0014768	peak_0062579
155.103	-0.609703	0.14517	-4.19993	2.67e-05	0.00147804	peak_0016849
125.66	-0.591011	0.140712	-4.20016	2.66725e-05	0.00147804	peak_0047640
21.7227	1.57289	0.374496	4.20001	2.66901e-05	0.00147804	peak_0082169
232.921	-0.539641	0.128509	-4.19924	2.67816e-05	0.00148079	peak_0021547
352.959	0.737389	0.175602	4.19921	2.67853e-05	0.00148079	peak_0070775
795.279	-0.541244	0.128946	-4.19745	2.69933e-05	0.0014903	peak_0018279
190.397	-0.752814	0.179349	-4.19748	2.69903e-05	0.0014903	peak_0070706
113.683	-1.70549	0.406359	-4.19702	2.70452e-05	0.00149137	peak_0067909
174.598	0.829135	0.197555	4.19699	2.70485e-05	0.00149137	peak_0073700
135.536	-0.728724	0.173655	-4.19639	2.712e-05	0.00149432	peak_0014146
52.4244	-1.03189	0.245969	-4.19523	2.72599e-05	0.00150103	peak_0048603
321.422	0.646253	0.154054	4.19497	2.72905e-05	0.00150172	peak_0028055
35.7582	-1.35636	0.323369	-4.19447	2.73512e-05	0.00150406	peak_0011085
133.706	-0.811327	0.193463	-4.1937	2.74443e-05	0.00150818	peak_0014413
244.619	-0.744625	0.17759	-4.19295	2.75355e-05	0.00151027	peak_0007196
7.35172	2.9373	0.700531	4.19296	2.75341e-05	0.00151027	peak_0025142
131.834	0.738885	0.176222	4.19293	2.75369e-05	0.00151027	peak_0072405
221.125	-0.747052	0.17821	-4.19198	2.76533e-05	0.00151566	peak_0019921
128.216	0.777383	0.1855	4.19075	2.78037e-05	0.00152289	peak_0047613
162.5	-0.835523	0.19939	-4.1904	2.78464e-05	0.00152423	peak_0047343
113.887	-0.752868	0.179686	-4.1899	2.79071e-05	0.00152554	peak_0069289
52.9687	-1.09432	0.261179	-4.18992	2.79054e-05	0.00152554	peak_0077199
203.128	-0.62621	0.149493	-4.18888	2.80337e-05	0.00152843	peak_0026222
92.0207	-0.735054	0.175477	-4.1889	2.80311e-05	0.00152843	peak_0035809
65.0188	-0.834918	0.199311	-4.18901	2.80174e-05	0.00152843	peak_0068465
132.986	-0.635453	0.151695	-4.189	2.8018e-05	0.00152843	peak_0076608
633.917	-0.60719	0.144978	-4.18816	2.81227e-05	0.00153228	peak_0013823
15.775	-1.63247	0.389846	-4.18747	2.82075e-05	0.00153489	peak_0014135
166.884	0.538638	0.128628	4.18757	2.81963e-05	0.00153489	peak_0041281
507.404	0.711863	0.170011	4.18716	2.82464e-05	0.001536	peak_0078836
145.02	-0.762009	0.182043	-4.18587	2.84081e-05	0.00154266	peak_0012866
129.584	-1.58	0.377486	-4.18558	2.84433e-05	0.00154266	peak_0027839
206.793	0.706462	0.168779	4.18571	2.84277e-05	0.00154266	peak_0049525
26.9496	-1.13263	0.270589	-4.18578	2.84185e-05	0.00154266	peak_0062524
53.4175	-1.02836	0.245705	-4.18534	2.84742e-05	0.00154333	peak_0060944
164.962	-0.919553	0.219742	-4.1847	2.8554e-05	0.00154664	peak_0064828
23.2709	-1.49518	0.357349	-4.18411	2.86291e-05	0.00154971	peak_0014788
90.4984	-0.674456	0.16122	-4.18345	2.87119e-05	0.00155229	peak_0014320
48.5832	-1.3031	0.311507	-4.18321	2.87417e-05	0.00155229	peak_0041485
33.2133	-1.29004	0.308392	-4.18313	2.87517e-05	0.00155229	peak_0051373
33.8022	-1.06585	0.254779	-4.18342	2.87158e-05	0.00155229	peak_0060818
863.237	0.473041	0.113097	4.18262	2.88174e-05	0.00155281	peak_0049682
86.3107	0.716283	0.171249	4.1827	2.88063e-05	0.00155281	peak_0049693
24.9141	-1.31456	0.314277	-4.18282	2.87921e-05	0.00155281	peak_0082196
61.6957	-0.865519	0.206942	-4.18242	2.8842e-05	0.00155313	peak_0017614
32.5667	-1.20122	0.287257	-4.18168	2.89357e-05	0.00155615	peak_0005112
206.841	0.655399	0.15673	4.18171	2.89322e-05	0.00155615	peak_0020008
503.616	-0.455823	0.109043	-4.18021	2.91243e-05	0.00156528	peak_0030742
247.686	-0.803883	0.192322	-4.17989	2.91652e-05	0.00156647	peak_0006999
427.766	0.501091	0.119905	4.17906	2.92722e-05	0.0015712	peak_0022259
203.327	-0.631976	0.151256	-4.17819	2.93837e-05	0.00157617	peak_0054350
77.7533	-0.852546	0.204118	-4.17674	2.95715e-05	0.00158522	peak_0073520
148.001	-0.541195	0.129589	-4.17623	2.96382e-05	0.00158776	peak_0059531
1000.49	-0.552092	0.132215	-4.17572	2.97044e-05	0.00158952	peak_0002413
30.2231	-1.28826	0.308516	-4.17568	2.97093e-05	0.00158952	peak_0043937
73.1637	-0.815414	0.195369	-4.1737	2.99687e-05	0.00160237	peak_0067440
43.6826	-1.27851	0.306355	-4.17331	3.0021e-05	0.0016031	peak_0058670
110.61	-0.786953	0.188567	-4.17333	3.0018e-05	0.0016031	peak_0075028
376.165	0.449603	0.107737	4.17316	3.00407e-05	0.00160312	peak_0013147
181.084	-0.576903	0.138258	-4.17265	3.01073e-05	0.00160565	peak_0047796
219.783	0.68967	0.165296	4.17234	3.01493e-05	0.00160685	peak_0017173
458.801	-0.775577	0.186003	-4.16969	3.05008e-05	0.00162454	peak_0048563
43.8522	1.0616	0.254661	4.16867	3.06382e-05	0.0016303	peak_0022051
35.2691	-1.06343	0.255106	-4.1686	3.06481e-05	0.0016303	peak_0068605
300.147	-0.581504	0.139508	-4.16826	3.06935e-05	0.00163167	peak_0036911
306.395	-0.612672	0.147018	-4.16731	3.08211e-05	0.0016374	peak_0029381
61.5004	-0.761916	0.182858	-4.1667	3.09042e-05	0.00163995	peak_0014145
50.5077	-1.262	0.302881	-4.16667	3.09085e-05	0.00163995	peak_0028364
574.608	0.441512	0.105984	4.16583	3.10215e-05	0.00164489	peak_0029291
323.84	-0.676919	0.162512	-4.16535	3.10879e-05	0.00164736	peak_0043000
103.485	1.10239	0.264708	4.16457	3.11937e-05	0.00165095	peak_0026947
707.561	0.512707	0.123112	4.16456	3.11953e-05	0.00165095	peak_0042308
51.1703	-0.922514	0.221554	-4.16384	3.12941e-05	0.00165512	peak_0006166
356.253	0.523489	0.125737	4.16336	3.136e-05	0.00165755	peak_0013934
18.6131	-1.43143	0.343852	-4.16294	3.14178e-05	0.00165955	peak_0061994
292.007	-0.499923	0.120108	-4.1623	3.1506e-05	0.00166148	peak_0024400
281.055	-0.570224	0.136994	-4.1624	3.14923e-05	0.00166148	peak_0047977
81.5263	-0.701208	0.168469	-4.16224	3.15143e-05	0.00166148	peak_0082785
272.584	-0.469185	0.112794	-4.15967	3.18712e-05	0.00167922	peak_0004905
186.792	0.668117	0.160638	4.15914	3.1945e-05	0.00168204	peak_0027937
103.85	0.801725	0.192781	4.15872	3.20031e-05	0.00168404	peak_0035855
25.5171	-1.79593	0.432115	-4.15613	3.23681e-05	0.00170217	peak_0039973
262.374	0.702422	0.169016	4.15595	3.23937e-05	0.00170231	peak_0024475
68.7336	-0.917024	0.22066	-4.15582	3.24118e-05	0.00170231	peak_0039309
353.21	-0.510222	0.12279	-4.15523	3.24963e-05	0.00170567	peak_0064185
834.551	-0.702415	0.169078	-4.1544	3.26149e-05	0.00171052	peak_0064777
382.285	0.408819	0.0984089	4.15429	3.26299e-05	0.00171052	peak_0082866
233.52	-0.598923	0.144179	-4.15402	3.26684e-05	0.00171145	peak_0030216
34.4579	-1.08056	0.260153	-4.15358	3.27317e-05	0.00171158	peak_0017700
176.679	-0.819116	0.197201	-4.15371	3.27127e-05	0.00171158	peak_0035684
403.659	-0.640572	0.154222	-4.15357	3.27326e-05	0.00171158	peak_0080189
44.4015	-0.990131	0.238422	-4.15286	3.28347e-05	0.00171475	peak_0011488
67.081	-0.678642	0.163414	-4.15289	3.28303e-05	0.00171475	peak_0063261
79.9993	-0.926579	0.223146	-4.15234	3.29088e-05	0.00171647	peak_0069208
148.959	-0.990546	0.238544	-4.15246	3.2892e-05	0.00171647	peak_0074909
540.528	0.561807	0.135326	4.15151	3.30289e-05	0.00172165	peak_0038489
47.4773	-1.02919	0.247952	-4.15078	3.31351e-05	0.0017261	peak_0063452
74.2965	-0.933957	0.225065	-4.14972	3.32882e-05	0.00173299	peak_0040412
139.471	0.708947	0.170957	4.14692	3.36975e-05	0.00175308	peak_0011932
919.548	0.417848	0.100764	4.14679	3.37163e-05	0.00175308	peak_0045766
16.236	-1.80737	0.435922	-4.14609	3.38203e-05	0.00175739	peak_0005215
13.8483	-1.93134	0.465928	-4.14516	3.39584e-05	0.00176346	peak_0005015
44.1199	-1.47572	0.356028	-4.14494	3.39904e-05	0.00176375	peak_0003608
78.6174	-1.00178	0.241694	-4.14483	3.40065e-05	0.00176375	peak_0015487
346.955	-0.472839	0.114103	-4.14397	3.41345e-05	0.00176929	peak_0042288
258.552	-0.561356	0.135474	-4.14363	3.41849e-05	0.00177079	peak_0002671
24.4212	-1.22654	0.296021	-4.1434	3.4219e-05	0.00177145	peak_0070396
78.7438	-0.73492	0.177416	-4.14235	3.4377e-05	0.00177852	peak_0040242
49.7804	0.949761	0.229312	4.14179	3.44613e-05	0.00178177	peak_0015531
287.78	0.45464	0.109789	4.14103	3.45756e-05	0.00178559	peak_0018006
509.408	-0.609623	0.147216	-4.14101	3.45781e-05	0.00178559	peak_0079452
741.85	-0.732429	0.176896	-4.14045	3.46618e-05	0.00178769	peak_0079976
27.0274	1.10754	0.267483	4.14059	3.46407e-05	0.00178769	peak_0081800
291.658	0.681696	0.164698	4.13906	3.48731e-05	0.00179699	peak_0006750
142.058	-0.72509	0.175186	-4.13898	3.48855e-05	0.00179699	peak_0019902
129.427	-0.831693	0.201053	-4.13668	3.5237e-05	0.00181397	peak_0019816
74.2879	-0.870724	0.210525	-4.13598	3.53451e-05	0.00181841	peak_0068616
108.014	-0.778822	0.188326	-4.13549	3.54197e-05	0.00182112	peak_0016188
269.217	-0.709348	0.171541	-4.13515	3.54717e-05	0.00182267	peak_0036562
305.13	-0.490059	0.118536	-4.13427	3.56082e-05	0.00182855	peak_0002618
106.334	0.548153	0.132639	4.13268	3.58565e-05	0.00184016	peak_0062585
58.4123	-1.09368	0.264667	-4.13228	3.59178e-05	0.00184217	peak_0001577
125.429	-0.859816	0.208192	-4.12992	3.62885e-05	0.00186003	peak_0008736
106.064	-0.684764	0.165843	-4.129	3.6435e-05	0.00186639	peak_0068511
313.081	0.452003	0.109493	4.12813	3.65724e-05	0.00187227	peak_0001121
57.378	-1.10963	0.268847	-4.12737	3.6693e-05	0.001877	peak_0035159
156.933	0.612373	0.148372	4.12727	3.671e-05	0.001877	peak_0052666
29.3323	-1.3519	0.327635	-4.12624	3.6874e-05	0.00188423	peak_0067706
191.338	0.733196	0.177778	4.12422	3.71998e-05	0.0018997	peak_0063936
240.77	-0.774149	0.187729	-4.12376	3.7274e-05	0.00190233	peak_0035918
233.1	-0.452326	0.109714	-4.12276	3.74354e-05	0.00190939	peak_0046259
82.8469	-0.980604	0.237906	-4.12182	3.75894e-05	0.00191607	peak_0013096
29.4789	-1.68287	0.408317	-4.12149	3.76433e-05	0.00191646	peak_0026229
322.016	-0.643782	0.156197	-4.12159	3.76262e-05	0.00191646	peak_0050548
248.095	0.570802	0.138519	4.12075	3.77635e-05	0.0019214	peak_0026634
200.083	0.92549	0.224685	4.11906	3.80415e-05	0.00193436	peak_0028450
530.979	-0.475558	0.115462	-4.11874	3.80952e-05	0.00193591	peak_0002262
50.5165	-0.835082	0.202793	-4.1179	3.82344e-05	0.00194179	peak_0046288
22.9315	-1.39652	0.339183	-4.11731	3.83327e-05	0.00194559	peak_0051994
244.168	0.54895	0.133337	4.11701	3.83816e-05	0.00194689	peak_0009909
63.0154	-0.785101	0.190708	-4.11677	3.84213e-05	0.00194771	peak_0044712
69.9554	0.862557	0.209582	4.11561	3.86162e-05	0.0019564	peak_0005967
34.7663	-0.999294	0.242846	-4.11492	3.87308e-05	0.00196101	peak_0016793
86.469	-0.768426	0.186888	-4.11169	3.92778e-05	0.00198749	peak_0077135
176.947	-0.84722	0.20609	-4.11092	3.94085e-05	0.00199289	peak_0034472
271.59	0.631733	0.15368	4.1107	3.94463e-05	0.00199359	peak_0050824
66.5238	-0.966449	0.235127	-4.11032	3.95107e-05	0.00199563	peak_0026798
212.782	-1.15409	0.280802	-4.10999	3.95675e-05	0.00199728	peak_0067916
200.468	-0.643393	0.156567	-4.10937	3.96736e-05	0.00200142	peak_0081990
184.863	-0.614705	0.149593	-4.10919	3.97053e-05	0.0020018	peak_0054666
246.402	-0.746348	0.181676	-4.10813	3.9888e-05	0.00200979	peak_0024144
760.994	0.611398	0.148849	4.10751	3.99954e-05	0.00201398	peak_0038646
11.2419	-1.79437	0.436958	-4.10651	4.01681e-05	0.00202145	peak_0053074
121.134	0.842677	0.205256	4.10549	4.03455e-05	0.00202915	peak_0054045
20.5301	-1.42309	0.346849	-4.10292	4.07966e-05	0.0020506	peak_0072270
106.176	0.662172	0.161449	4.10143	4.106e-05	0.00206259	peak_0018552
174.379	-0.690877	0.168464	-4.10105	4.11286e-05	0.00206479	peak_0038657
435.118	0.392868	0.0958178	4.10016	4.12866e-05	0.00207146	peak_0050783
96.3469	-0.752554	0.183572	-4.0995	4.14048e-05	0.00207614	peak_0019988
191.965	0.51199	0.124915	4.0987	4.15474e-05	0.00208204	peak_0042921
59.21	0.821999	0.200584	4.09802	4.16696e-05	0.0020869	peak_0065969
498.077	-0.516196	0.125967	-4.09785	4.17004e-05	0.00208718	peak_0045395
371.444	-0.729517	0.17805	-4.09726	4.18067e-05	0.00209124	peak_0031282
72.0339	-1.05571	0.257692	-4.0968	4.18895e-05	0.00209412	peak_0077304
29.5247	-1.21992	0.297818	-4.09618	4.20024e-05	0.0020985	peak_0070082
1091.97	-0.399467	0.0975451	-4.09521	4.21794e-05	0.00210608	peak_0050344
396.337	-0.475675	0.11616	-4.09499	4.22196e-05	0.00210682	peak_0013420
145.633	-0.756191	0.184673	-4.09476	4.22601e-05	0.00210739	peak_0045016
165.22	-0.569998	0.139206	-4.09464	4.22817e-05	0.00210739	peak_0058406
272.934	-0.750434	0.1833	-4.09401	4.23968e-05	0.00211185	peak_0025485
62.7449	-0.869977	0.212538	-4.09327	4.25326e-05	0.00211735	peak_0052312
44.6736	-0.937664	0.229125	-4.09237	4.26991e-05	0.00212437	peak_0070437
129.339	0.747815	0.18276	4.09178	4.2808e-05	0.00212851	peak_0001649
132.826	-1.02029	0.24939	-4.09113	4.29282e-05	0.0021332	peak_0000533
67.8632	0.779151	0.190525	4.08949	4.32326e-05	0.00214705	peak_0042118
160.667	-0.89609	0.219139	-4.08915	4.32961e-05	0.00214891	peak_0070553
223.734	-0.707424	0.173021	-4.08867	4.33849e-05	0.00215204	peak_0044777
100.306	-0.7551	0.184727	-4.08766	4.35747e-05	0.00216016	peak_0044651
51.2587	-0.94231	0.230539	-4.08741	4.36213e-05	0.00216118	peak_0064733
134.494	-0.602596	0.147436	-4.08717	4.3667e-05	0.00216216	peak_0010650
67.649	-1.001	0.244932	-4.08687	4.37233e-05	0.00216365	peak_0054948
160.776	-0.893094	0.218542	-4.08661	4.37724e-05	0.00216479	peak_0053451
222.036	0.712503	0.174389	4.0857	4.39433e-05	0.00217195	peak_0030662
132.47	0.723682	0.177148	4.08518	4.40427e-05	0.00217557	peak_0014544
280.302	-0.694399	0.170027	-4.08405	4.42573e-05	0.00218487	peak_0066260
165.84	0.684919	0.167786	4.08209	4.46315e-05	0.00220204	peak_0021024
18.0654	-1.56436	0.383268	-4.08163	4.47207e-05	0.00220512	peak_0024015
238.555	0.762471	0.186824	4.08123	4.47986e-05	0.00220765	peak_0060557
95.8142	0.728056	0.178412	4.08075	4.48901e-05	0.00221003	peak_0002305
43.5596	-1.27776	0.313123	-4.0807	4.49e-05	0.00221003	peak_0064899
91.147	0.745841	0.182784	4.08046	4.49472e-05	0.00221104	peak_0045525
41.9269	-1.04443	0.255987	-4.08	4.5035e-05	0.00221274	peak_0020920
77.5411	0.849476	0.208201	4.08007	4.50218e-05	0.00221274	peak_0024082
38.97	-1.19762	0.29355	-4.07979	4.50765e-05	0.00221347	peak_0018995
252.132	0.643639	0.15778	4.07936	4.51608e-05	0.00221629	peak_0072392
532.569	-0.475699	0.116679	-4.077	4.56211e-05	0.00223492	peak_0039023
147.136	-0.755916	0.185401	-4.0772	4.55816e-05	0.00223492	peak_0061412
40.2518	-1.44417	0.354212	-4.07713	4.5595e-05	0.00223492	peak_0068558
979.324	-0.469197	0.115105	-4.07627	4.57647e-05	0.00223631	peak_0008969
471.546	0.478897	0.117473	4.07665	4.56897e-05	0.00223631	peak_0019865
35.9245	-1.25485	0.30785	-4.07617	4.57842e-05	0.00223631	peak_0032000
220.421	0.535586	0.131386	4.07644	4.57297e-05	0.00223631	peak_0034110
55.0334	-1.28038	0.314097	-4.07639	4.57412e-05	0.00223631	peak_0036136
37.352	-1.08914	0.267217	-4.07584	4.58481e-05	0.00223812	peak_0074602
41.5955	-0.988694	0.242598	-4.07545	4.59263e-05	0.00224062	peak_0069310
86.6811	-0.746767	0.183275	-4.07457	4.60994e-05	0.00224775	peak_0075399
85.5851	0.871706	0.213948	4.07439	4.61352e-05	0.00224817	peak_0052667
108.735	-0.856477	0.210234	-4.07393	4.62273e-05	0.00225121	peak_0003136
109.144	-0.74244	0.182247	-4.0738	4.62518e-05	0.00225121	peak_0014791
437.252	0.577253	0.14171	4.07348	4.6315e-05	0.00225296	peak_0050467
88.7157	0.749487	0.184002	4.07325	4.63606e-05	0.00225386	peak_0042219
141.4	-0.742898	0.182417	-4.07253	4.65047e-05	0.00225954	peak_0040428
172.73	-0.437257	0.107376	-4.0722	4.65717e-05	0.00226148	peak_0037016
130.993	-1.83484	0.450642	-4.07162	4.6688e-05	0.0022658	peak_0003908
17.4249	1.54652	0.380006	4.06973	4.70682e-05	0.00228292	peak_0024694
321.929	-0.545255	0.134002	-4.06902	4.72122e-05	0.00228686	peak_0028593
427.505	0.457961	0.112551	4.06892	4.72321e-05	0.00228686	peak_0050039
181.582	0.558765	0.137318	4.06912	4.71912e-05	0.00228686	peak_0062433
153.881	0.584459	0.143666	4.06817	4.73835e-05	0.00229285	peak_0077710
158.372	0.5537	0.136125	4.06757	4.7505e-05	0.00229338	peak_0025663
28.3002	-1.2326	0.303012	-4.06781	4.74573e-05	0.00229338	peak_0039970
548.588	0.476367	0.117108	4.06775	4.74697e-05	0.00229338	peak_0061562
101.973	-1.05573	0.259545	-4.06761	4.74986e-05	0.00229338	peak_0081097
137.97	-0.641251	0.157662	-4.06724	4.75731e-05	0.00229534	peak_0064829
229.635	-0.639211	0.157176	-4.06684	4.76551e-05	0.00229796	peak_0062523
105.541	-0.729805	0.179544	-4.06478	4.80782e-05	0.00231702	peak_0042080
83.6687	-1.04107	0.256159	-4.06417	4.82043e-05	0.00232175	peak_0027845
254.638	0.69574	0.171225	4.0633	4.83828e-05	0.00232741	peak_0040012
191.364	-0.782426	0.192569	-4.06309	4.84269e-05	0.00232741	peak_0054476
157.319	0.487532	0.119981	4.06341	4.8361e-05	0.00232741	peak_0063970
104.807	-0.659403	0.162292	-4.06306	4.8434e-05	0.00232741	peak_0082371
112.707	-0.754642	0.185746	-4.06277	4.8493e-05	0.0023289	peak_0019175
16.5591	-1.56569	0.385463	-4.06184	4.86869e-05	0.00233686	peak_0040733
107.552	-1.1581	0.285136	-4.06157	4.87442e-05	0.00233826	peak_0003061
261.808	0.690001	0.16991	4.06098	4.88671e-05	0.00233875	peak_0014546
673.222	-0.59263	0.14592	-4.06133	4.8793e-05	0.00233875	peak_0038851
220.215	-0.427809	0.105346	-4.061	4.88638e-05	0.00233875	peak_0051219
373.31	-0.722351	0.177864	-4.06124	4.8812e-05	0.00233875	peak_0072491
598.289	0.590688	0.145507	4.0595	4.91779e-05	0.00235227	peak_0007163
82.0653	0.777814	0.191696	4.05754	4.95926e-05	0.00237074	peak_0044682
21.1567	-1.22426	0.301745	-4.05728	4.96483e-05	0.00237203	peak_0058410
73.8156	-0.763577	0.188226	-4.05671	4.97694e-05	0.00237645	peak_0068726
299.44	0.643108	0.158549	4.05622	4.9873e-05	0.00237981	peak_0037218
107.054	-1.37517	0.339037	-4.05611	4.9897e-05	0.00237981	peak_0063717
551.202	0.527085	0.129994	4.05468	5.02031e-05	0.00239182	peak_0049546
75.9489	-0.930191	0.229414	-4.05463	5.02133e-05	0.00239182	peak_0069458
216.607	0.626614	0.154547	4.05453	5.02353e-05	0.00239182	peak_0078545
67.6045	-1.17721	0.290474	-4.0527	5.06296e-05	0.00240921	peak_0043790
94.9387	0.707625	0.174645	4.05179	5.08278e-05	0.00241726	peak_0013003
83.7378	-0.743104	0.183445	-4.05083	5.10362e-05	0.00242578	peak_0026706
411.112	-0.448492	0.110765	-4.04905	5.14249e-05	0.00244286	peak_0062521
85.1111	-0.810535	0.200261	-4.04739	5.17916e-05	0.00245887	peak_0064859
66.0836	0.653388	0.161467	4.04659	5.19698e-05	0.00246592	peak_0014881
49.0831	-1.09725	0.271169	-4.04636	5.20203e-05	0.00246691	peak_0014706
994.596	-0.569414	0.140733	-4.04604	5.20911e-05	0.00246745	peak_0036832
70.9381	-0.804847	0.198918	-4.04613	5.2072e-05	0.00246745	peak_0064009
423.05	-0.457226	0.113034	-4.04504	5.23139e-05	0.00247659	peak_0079290
128.299	-0.64834	0.160302	-4.0445	5.24359e-05	0.00247812	peak_0008268
143.027	0.599144	0.148135	4.04458	5.2416e-05	0.00247812	peak_0041129
180.797	-0.556338	0.137551	-4.04461	5.24105e-05	0.00247812	peak_0074258
43.1952	-0.90447	0.223661	-4.04393	5.25635e-05	0.00248084	peak_0014810
362.494	-0.620569	0.153463	-4.04376	5.26002e-05	0.00248084	peak_0015315
37.7346	1.13225	0.280003	4.04371	5.26128e-05	0.00248084	peak_0050051
1013.37	-0.587712	0.145333	-4.04389	5.25714e-05	0.00248084	peak_0064793
277.933	0.510595	0.126298	4.04278	5.28201e-05	0.0024892	peak_0043402
61.1029	-0.740548	0.183196	-4.04238	5.29124e-05	0.00249213	peak_0075410
150.923	-0.710148	0.175724	-4.04127	5.31623e-05	0.00250248	peak_0016613
214.642	-0.56314	0.13939	-4.04004	5.34426e-05	0.00251178	peak_0054170
546.619	0.551661	0.136546	4.04012	5.34243e-05	0.00251178	peak_0054854
147.517	-0.844057	0.208925	-4.04	5.34506e-05	0.00251178	peak_0067676
137.35	-0.574816	0.142304	-4.03934	5.36007e-05	0.00251741	peak_0041321
81.9202	-0.963962	0.238689	-4.03856	5.37799e-05	0.0025244	peak_0032231
263.896	-0.582991	0.144369	-4.03819	5.38652e-05	0.00252698	peak_0061624
22.4793	-1.33489	0.330784	-4.03552	5.44803e-05	0.00255439	peak_0025979
191.598	-0.4555	0.112877	-4.03535	5.45209e-05	0.00255485	peak_0000148
229.788	-0.557152	0.138091	-4.03468	5.4676e-05	0.00255923	peak_0008519
142.755	0.579487	0.143626	4.03469	5.46748e-05	0.00255923	peak_0078208
164.906	-0.885897	0.219592	-4.03429	5.47686e-05	0.00256212	peak_0031801
667.992	0.680923	0.168814	4.03356	5.4938e-05	0.0025673	peak_0031998
72.9418	-0.67202	0.166608	-4.03355	5.49411e-05	0.0025673	peak_0053367
30.8227	-1.31013	0.324872	-4.03275	5.51275e-05	0.00257456	peak_0051880
261.485	-0.716287	0.17763	-4.03246	5.51953e-05	0.00257628	peak_0005437
252.676	0.590715	0.146512	4.03185	5.5339e-05	0.00258153	peak_0013742
348.818	0.714206	0.177166	4.03128	5.5473e-05	0.00258633	peak_0079524
263.446	-0.762689	0.189209	-4.03094	5.55549e-05	0.002588	peak_0000054
243.311	-0.725054	0.179875	-4.03087	5.55712e-05	0.002588	peak_0064512
52.2031	-0.933669	0.231659	-4.03036	5.56916e-05	0.00259071	peak_0022044
13.6901	-1.72918	0.429037	-4.03037	5.56887e-05	0.00259071	peak_0082710
312.466	0.574075	0.142444	4.03018	5.57342e-05	0.00259123	peak_0009170
85.919	-0.761087	0.188925	-4.02852	5.61286e-05	0.00260811	peak_0013485
29.81	1.19402	0.296489	4.0272	5.64448e-05	0.00261978	peak_0014857
48.4314	-1.39224	0.34572	-4.02708	5.64744e-05	0.00261978	peak_0054691
24.0007	-1.38784	0.344623	-4.02713	5.64616e-05	0.00261978	peak_0082102
690.158	-0.422863	0.105018	-4.02657	5.65969e-05	0.00262303	peak_0014167
135.534	0.777	0.192971	4.02652	5.66077e-05	0.00262303	peak_0035088
481.058	-0.485364	0.120547	-4.02634	5.66524e-05	0.00262364	peak_0064179
169.15	-0.790949	0.196591	-4.02332	5.73843e-05	0.00265458	peak_0011053
59.3091	-1.20709	0.300022	-4.02333	5.73822e-05	0.00265458	peak_0080248
139.413	-0.549723	0.136689	-4.02172	5.77757e-05	0.00267119	peak_0079767
792.189	0.600443	0.149324	4.02108	5.7931e-05	0.00267688	peak_0076935
55.6443	-1.15066	0.286193	-4.02058	5.80558e-05	0.00267967	peak_0006437
288.29	0.481374	0.119727	4.02059	5.80533e-05	0.00267967	peak_0007697
20.8095	-1.46672	0.364885	-4.01967	5.828e-05	0.00268852	peak_0062831
34.4079	1.28472	0.319701	4.01849	5.85719e-05	0.00270049	peak_0052317
125.942	-0.924344	0.230166	-4.01598	5.91986e-05	0.00272787	peak_0024011
52.5627	-0.896687	0.223305	-4.01552	5.93147e-05	0.00273018	peak_0062352
104.422	-0.731424	0.182147	-4.01557	5.93012e-05	0.00273018	peak_0077029
116.651	-0.585519	0.145821	-4.01531	5.93665e-05	0.00273106	peak_0009641
113.62	-0.677548	0.168779	-4.01441	5.95948e-05	0.00274004	peak_0055819
106.137	-0.63134	0.157283	-4.01404	5.96876e-05	0.00274279	peak_0063195
120.84	-0.852539	0.212533	-4.01133	6.03767e-05	0.00277292	peak_0050251
153.121	-0.749125	0.18678	-4.01073	6.05305e-05	0.00277845	peak_0004234
35.4473	1.19971	0.29914	4.01054	6.05812e-05	0.00277924	peak_0010505
91.543	-1.01302	0.252645	-4.00964	6.0811e-05	0.00278824	peak_0070512
298.615	0.628243	0.156704	4.00912	6.09461e-05	0.00279289	peak_0056045
83.7623	-1.53124	0.381959	-4.00892	6.09965e-05	0.00279366	peak_0026045
140.276	0.623771	0.15562	4.00829	6.11599e-05	0.00279652	peak_0004178
47.824	-1.0118	0.252419	-4.0084	6.11325e-05	0.00279652	peak_0023885
34.2029	-1.23145	0.307214	-4.00843	6.11236e-05	0.00279652	peak_0073500
235.647	-0.646725	0.161422	-4.00641	6.16479e-05	0.00281573	peak_0031278
58.5026	-0.96184	0.24007	-4.0065	6.1624e-05	0.00281573	peak_0064640
137.306	-0.633649	0.15819	-4.00562	6.18551e-05	0.00282364	peak_0005200
146.949	0.576006	0.143815	4.00519	6.19666e-05	0.00282451	peak_0040213
334.336	-0.6592	0.164579	-4.00536	6.19227e-05	0.00282451	peak_0042062
57.1075	-1.12995	0.282123	-4.00516	6.19761e-05	0.00282451	peak_0053977
56.3194	-0.984462	0.245886	-4.00373	6.23505e-05	0.00284001	peak_0040238
177.411	-0.471034	0.117659	-4.00337	6.24464e-05	0.00284282	peak_0003518
145.008	-0.723406	0.18071	-4.00313	6.25096e-05	0.00284413	peak_0041866
31.3043	-1.26997	0.317292	-4.00253	6.26684e-05	0.00284824	peak_0017503
26.467	1.08077	0.270018	4.0026	6.26514e-05	0.00284824	peak_0079478
123.607	-0.611525	0.152833	-4.00126	6.30059e-05	0.00286201	peak_0053085
32.1241	-1.62472	0.4061	-4.0008	6.31284e-05	0.00286601	peak_0026347
26.9131	-1.36244	0.340555	-4.00065	6.31681e-05	0.00286624	peak_0030675
96.0749	-0.634698	0.158668	-4.00017	6.32976e-05	0.00286742	peak_0045658
52.4605	-1.19118	0.297775	-4.00028	6.32673e-05	0.00286742	peak_0060719
585.528	-0.576444	0.144098	-4.00036	6.3246e-05	0.00286742	peak_0064688
44.1951	-0.964066	0.241087	-3.99883	6.36563e-05	0.00288209	peak_0019246
74.8287	0.772334	0.193184	3.99792	6.39011e-05	0.0028916	peak_0044610
53.6202	-1.01607	0.254167	-3.99764	6.39782e-05	0.00289352	peak_0014735
85.5359	-0.857604	0.214575	-3.99676	6.42148e-05	0.00290263	peak_0038524
151.149	-0.710999	0.177908	-3.99643	6.43037e-05	0.00290507	peak_0062344
92.3624	-0.646025	0.161674	-3.99585	6.44617e-05	0.00290904	peak_0006533
52.2552	-1.25229	0.313396	-3.99588	6.44554e-05	0.00290904	peak_0018701
56.1524	-1.20296	0.301113	-3.99504	6.46828e-05	0.00291585	peak_0009799
50.3464	-0.808691	0.20242	-3.99511	6.46637e-05	0.00291585	peak_0023876
64.0135	-0.716756	0.179429	-3.99464	6.47918e-05	0.00291918	peak_0067681
222.952	-0.599113	0.149998	-3.99413	6.49318e-05	0.0029239	peak_0045962
265	0.761931	0.190855	3.9922	6.54623e-05	0.00294619	peak_0023365
169.007	-0.633104	0.158608	-3.99161	6.5625e-05	0.00295032	peak_0026561
380.268	-0.707953	0.177356	-3.99171	6.55978e-05	0.00295032	peak_0036528
79.7776	0.622452	0.155984	3.99048	6.59403e-05	0.00296289	peak_0070466
318.116	-0.728013	0.182557	-3.98786	6.66728e-05	0.00299418	peak_0025333
35.462	-1.01873	0.255484	-3.98746	6.67831e-05	0.00299752	peak_0043519
14.1075	-1.48556	0.372605	-3.98696	6.69243e-05	0.00300223	peak_0001613
28.1932	-1.4301	0.35884	-3.98533	6.73878e-05	0.00301976	peak_0003914
59.1673	-0.84255	0.211408	-3.98541	6.73627e-05	0.00301976	peak_0078402
138.941	-0.60679	0.152313	-3.98383	6.7812e-05	0.00303713	peak_0074007
164.782	-0.659996	0.165737	-3.98219	6.82839e-05	0.00305661	peak_0064786
31.8211	-1.39162	0.349492	-3.98184	6.83828e-05	0.00305939	peak_0010007
59.7058	0.734463	0.184474	3.98139	6.85132e-05	0.00306335	peak_0007042
50.0937	-1.20529	0.30274	-3.98128	6.85451e-05	0.00306335	peak_0076649
84.2505	-0.705254	0.177169	-3.98069	6.87157e-05	0.00306933	peak_0034099
100.862	-0.666131	0.167352	-3.98041	6.87974e-05	0.00307132	peak_0002046
41.4914	-1.23733	0.310876	-3.98015	6.88732e-05	0.00307305	peak_0064586
150.983	-0.666912	0.167571	-3.97989	6.89481e-05	0.00307474	peak_0051884
57.1075	-0.803501	0.20191	-3.9795	6.90607e-05	0.00307811	peak_0068377
207.841	-0.599865	0.15079	-3.97814	6.94566e-05	0.0030941	peak_0050944
55.2352	0.957671	0.24077	3.97753	6.9634e-05	0.00309868	peak_0027794
337.121	-0.563909	0.141771	-3.9776	6.96134e-05	0.00309868	peak_0030337
71.502	-1.19316	0.300073	-3.97622	7.00201e-05	0.00311164	peak_0033358
339.91	0.49957	0.125642	3.97616	7.00377e-05	0.00311164	peak_0065626
166.712	0.721958	0.181567	3.97627	7.00058e-05	0.00311164	peak_0067022
38.2679	-1.12668	0.283445	-3.97494	7.03962e-05	0.00312589	peak_0045074
42.9606	-0.771612	0.194248	-3.9723	7.11829e-05	0.00315914	peak_0067660
68.4323	-0.982799	0.24747	-3.97139	7.14535e-05	0.00316902	peak_0039481
98.7928	-0.715427	0.180153	-3.97121	7.15077e-05	0.00316902	peak_0068579
103.966	0.712392	0.179391	3.97117	7.15202e-05	0.00316902	peak_0071538
79.6207	0.697676	0.175736	3.97002	7.18654e-05	0.00318262	peak_0040574
254.272	-0.877615	0.221089	-3.96951	7.20192e-05	0.00318773	peak_0020079
140.955	0.620527	0.156374	3.96823	7.24083e-05	0.00320325	peak_0036230
886.503	0.535284	0.134932	3.96708	7.27587e-05	0.00321703	peak_0019467
17.4765	-1.46658	0.369769	-3.96622	7.30227e-05	0.00322699	peak_0066836
83.9755	-0.79349	0.200078	-3.96591	7.31173e-05	0.00322945	peak_0050797
185.025	0.754314	0.190217	3.96555	7.32261e-05	0.00323254	peak_0046416
215.815	-0.586462	0.148006	-3.96242	7.4194e-05	0.00327353	peak_0009008
453.763	-0.562444	0.141977	-3.96152	7.44754e-05	0.0032842	peak_0041504
107.552	-0.696194	0.175754	-3.96118	7.45802e-05	0.00328707	peak_0032886
43.2078	-1.17302	0.296166	-3.96069	7.47349e-05	0.00329214	peak_0015694
79.3471	-0.7904	0.199603	-3.95986	7.49937e-05	0.00329842	peak_0048811
163.791	0.840775	0.212315	3.96003	7.4941e-05	0.00329842	peak_0067282
88.7748	-0.932103	0.235388	-3.95985	7.49966e-05	0.00329842	peak_0082402
307.472	-0.55766	0.140846	-3.95936	7.5151e-05	0.00330346	peak_0051167
211.36	0.594705	0.150213	3.95906	7.5244e-05	0.0033058	peak_0029136
67.3313	-0.856508	0.216377	-3.95841	7.54503e-05	0.00331311	peak_0072596
129.961	-0.845654	0.213655	-3.95804	7.55685e-05	0.00331655	peak_0048690
13.3917	-1.90169	0.480563	-3.95721	7.58301e-05	0.00332451	peak_0019262
62.4071	-0.912608	0.230617	-3.95724	7.58222e-05	0.00332451	peak_0056757
628.589	0.566214	0.143111	3.95646	7.60683e-05	0.0033332	peak_0014581
36.2964	-1.69918	0.429506	-3.95613	7.61749e-05	0.00333611	peak_0051514
121.927	0.745369	0.188416	3.95598	7.6222e-05	0.00333641	peak_0024361
24.3578	-1.12125	0.283467	-3.95547	7.63836e-05	0.00334163	peak_0032418
188.888	-0.41299	0.104413	-3.95535	7.64217e-05	0.00334163	peak_0042012
55.6038	-0.995719	0.251765	-3.95496	7.65483e-05	0.0033454	peak_0050014
143.757	-0.866048	0.219039	-3.95385	7.6904e-05	0.00335918	peak_0019779
328.393	0.62043	0.156952	3.953	7.71764e-05	0.00336931	peak_0048748
377.369	0.542428	0.137258	3.95189	7.75353e-05	0.00338164	peak_0070218
954.422	0.60344	0.152702	3.95175	7.75812e-05	0.00338164	peak_0070773
176.531	-1.15736	0.292867	-3.95182	7.75592e-05	0.00338164	peak_0076421
128.748	-0.525024	0.132868	-3.95147	7.76717e-05	0.00338381	peak_0006814
153.432	-0.772767	0.195612	-3.95052	7.7983e-05	0.00339559	peak_0055828
268.514	-0.517063	0.130927	-3.94926	7.83942e-05	0.00341171	peak_0058761
73.437	0.735812	0.186363	3.94828	7.87155e-05	0.0034239	peak_0065693
142.355	-0.527921	0.133733	-3.94758	7.89452e-05	0.00343209	peak_0062340
25.6677	-1.21685	0.30827	-3.94735	7.90222e-05	0.00343364	peak_0034904
43.333	-0.77163	0.195508	-3.94679	7.92057e-05	0.00343981	peak_0044492
56.0985	1.0781	0.273203	3.94616	7.94135e-05	0.00344704	peak_0058787
171.295	0.616987	0.156381	3.94542	7.96613e-05	0.00345418	peak_0031071
195.936	-0.633936	0.160672	-3.94552	7.96265e-05	0.00345418	peak_0051177
1043.37	0.351653	0.0891373	3.94506	7.97784e-05	0.00345745	peak_0017253
111.844	-0.925619	0.234699	-3.94385	8.01839e-05	0.00347321	peak_0016674
69.7811	-0.803841	0.203834	-3.94361	8.02625e-05	0.0034748	peak_0051156
434.283	0.508309	0.128922	3.94276	8.05506e-05	0.00348365	peak_0015583
182.689	0.489515	0.124152	3.94288	8.05098e-05	0.00348365	peak_0050085
43.3029	-0.955508	0.242437	-3.94127	8.10512e-05	0.00350347	peak_0053214
39.8656	-1.07678	0.27323	-3.94093	8.11653e-05	0.00350476	peak_0060872
78.9617	-1.05906	0.268728	-3.941	8.11423e-05	0.00350476	peak_0071217
27.7399	-1.02686	0.260646	-3.93967	8.15942e-05	0.00351793	peak_0005594
10.2552	-2.25653	0.572768	-3.9397	8.1584e-05	0.00351793	peak_0042139
43.4563	-0.915184	0.2323	-3.93966	8.15976e-05	0.00351793	peak_0072655
546.734	0.928351	0.235678	3.93907	8.17981e-05	0.00352162	peak_0019556
235.87	0.49169	0.124821	3.93916	8.17677e-05	0.00352162	peak_0046772
35.8502	-1.39969	0.355338	-3.93903	8.18103e-05	0.00352162	peak_0081543
280.52	-0.501944	0.127457	-3.93813	8.21192e-05	0.00353308	peak_0002252
243.307	0.559337	0.142044	3.93777	8.22412e-05	0.0035365	peak_0034232
110.636	-0.771668	0.195989	-3.9373	8.24035e-05	0.00354013	peak_0058638
332.096	0.611677	0.155355	3.93728	8.2411e-05	0.00354013	peak_0066846
329.192	-0.595728	0.151355	-3.93597	8.28603e-05	0.00355759	peak_0003531
725.333	0.640279	0.162684	3.93572	8.29472e-05	0.00355949	peak_0068572
43.1887	-1.22517	0.311319	-3.93543	8.30469e-05	0.00356175	peak_0005882
32.6827	-1.18144	0.300214	-3.93532	8.30858e-05	0.00356175	peak_0034430
83.0504	0.662826	0.168472	3.93435	8.34215e-05	0.0035743	peak_0022252
99.2475	-0.854818	0.217324	-3.93338	8.37587e-05	0.0035869	peak_0078728
74.6038	-1.06613	0.271101	-3.93258	8.40373e-05	0.00359697	peak_0035571
116.087	-0.625518	0.159088	-3.93191	8.42737e-05	0.00360523	peak_0031094
225.208	0.537738	0.136782	3.93135	8.44712e-05	0.00361182	peak_0045686
126.475	-0.659742	0.167847	-3.93062	8.47281e-05	0.00362094	peak_0081918
131.68	-0.791397	0.201382	-3.92984	8.5002e-05	0.00363078	peak_0076575
299.061	-0.577297	0.146907	-3.92968	8.50583e-05	0.00363131	peak_0001479
101.472	-0.790623	0.201263	-3.92831	8.55456e-05	0.00365024	peak_0022579
84.4044	-0.933121	0.237572	-3.92775	8.57448e-05	0.0036548	peak_0050328
335.092	0.448646	0.114222	3.92783	8.57144e-05	0.0036548	peak_0058309
49.8189	-1.2251	0.311919	-3.92764	8.57846e-05	0.0036548	peak_0080805
117.626	-0.944051	0.240422	-3.92665	8.61369e-05	0.00366793	peak_0065008
44.2202	-1.01069	0.25741	-3.92636	8.62402e-05	0.00366915	peak_0037038
113.195	-0.73714	0.187749	-3.9262	8.62981e-05	0.00366915	peak_0049008
37.5557	-0.930923	0.237101	-3.92627	8.62739e-05	0.00366915	peak_0079203
258.501	0.426733	0.108701	3.92573	8.64657e-05	0.00367342	peak_0054879
31.8583	-1.15552	0.29435	-3.92567	8.64871e-05	0.00367342	peak_0070120
14.306	1.63216	0.415948	3.92394	8.71118e-05	0.00369806	peak_0055394
27.5809	0.995422	0.253717	3.92335	8.73244e-05	0.0037052	peak_0077431
63.5272	-0.878966	0.224083	-3.92251	8.76315e-05	0.00371443	peak_0003318
138.831	-0.706913	0.180218	-3.92254	8.76209e-05	0.00371443	peak_0060914
712.506	0.552925	0.140978	3.92207	8.77911e-05	0.0037193	peak_0045682
93.3982	-0.807291	0.205854	-3.92166	8.79397e-05	0.00372369	peak_0024658
52.4448	1.05815	0.269908	3.92042	8.83949e-05	0.00373961	peak_0046074
99.3991	-0.665681	0.1698	-3.92039	8.84056e-05	0.00373961	peak_0066130
400.949	0.558887	0.14258	3.91981	8.86175e-05	0.00374666	peak_0074876
116.372	-0.928373	0.236888	-3.91904	8.89028e-05	0.00375681	peak_0037651
351.783	-0.700951	0.178906	-3.91799	8.92914e-05	0.00376909	peak_0010376
204.341	-0.50798	0.129657	-3.91788	8.93295e-05	0.00376909	peak_0050547
117.017	-0.83134	0.212182	-3.91806	8.92662e-05	0.00376909	peak_0055774
453.742	-0.337309	0.0861002	-3.91763	8.94223e-05	0.00376933	peak_0034433
163.091	-0.676705	0.172733	-3.91762	8.94261e-05	0.00376933	peak_0049458
490.718	-0.682654	0.174258	-3.9175	8.94725e-05	0.00376938	peak_0044596
452.426	-0.577633	0.14748	-3.91668	8.97761e-05	0.00378025	peak_0030206
14.0964	-1.48469	0.37916	-3.91574	9.01256e-05	0.00379304	peak_0007509
112.659	0.589192	0.150474	3.91558	9.01856e-05	0.00379364	peak_0025276
40.2928	0.958553	0.244836	3.91508	9.03754e-05	0.0037997	peak_0050290
201.362	0.60931	0.155645	3.91473	9.0504e-05	0.00380126	peak_0031000
57.7637	-1.28428	0.328057	-3.9148	9.04793e-05	0.00380126	peak_0064699
69.1235	0.87705	0.224121	3.91329	9.10479e-05	0.00382217	peak_0011287
55.7192	-0.691892	0.176932	-3.91051	9.21016e-05	0.00386442	peak_0026915
201.732	-0.774996	0.198189	-3.91039	9.21475e-05	0.00386442	peak_0067906
8.00327	2.42236	0.619579	3.90969	9.24146e-05	0.0038714	peak_0008370
68.3875	0.769338	0.196775	3.90974	9.2394e-05	0.0038714	peak_0025955
65.1955	-0.731889	0.187204	-3.90959	9.24538e-05	0.0038714	peak_0052151
109.22	-0.661553	0.169242	-3.90893	9.27074e-05	0.00388007	peak_0060952
13.3963	1.44666	0.370108	3.90874	9.27802e-05	0.00388007	peak_0008586
244.832	-0.698215	0.178632	-3.90868	9.2801e-05	0.00388007	peak_0018596
79.534	-0.575739	0.147307	-3.90843	9.28988e-05	0.00388221	peak_0052513
39.6591	-1.02683	0.262755	-3.90795	9.30816e-05	0.00388593	peak_0018490
116.245	-0.951698	0.243527	-3.90798	9.30707e-05	0.00388593	peak_0051400
605.166	-0.482014	0.123365	-3.90721	9.33668e-05	0.00389588	peak_0081349
143.048	-0.574699	0.147096	-3.90696	9.3465e-05	0.00389606	peak_0021613
38.4885	-0.941272	0.240922	-3.90696	9.34628e-05	0.00389606	peak_0025482
34.5465	-1.1747	0.300824	-3.90494	9.42504e-05	0.00392683	peak_0047797
159.14	-0.758201	0.194243	-3.90336	9.48654e-05	0.00394849	peak_0064242
375.552	-0.768098	0.196777	-3.9034	9.485e-05	0.00394849	peak_0069207
95.4508	0.715349	0.183273	3.9032	9.49311e-05	0.00394925	peak_0002758
159.294	-0.498714	0.127776	-3.90303	9.49947e-05	0.00394991	peak_0067211
59.7636	1.02433	0.262462	3.90277	9.50981e-05	0.00395223	peak_0046813
363.174	-0.457126	0.117136	-3.90251	9.52012e-05	0.00395454	peak_0038171
[truncated: 81,037 more rows]
