# Supplementary material
Source: Research Square preprint supplement (doi:10.21203/rs.3.rs-9485118/v1)
Supplement: Supplementary file 4 [file d01822b3b6568c8621f22352.xlsx]

## Sheet: TF_peak_gene_atlas.full.chromat
peakID	representative_gene	motif_set	tf_raw	candidate_list	motif_file	chr	start	end	GeneSymbol	ATAC_log2FC	ATAC_padj	Annotation	Distance_to_TSS	link_type	RNA_log2FC	RNA_padj	abs_RNA_log2FC	direction_consistency	link_score	TF_RNA_log2FC	TF_RNA_padj	peak_has_link	gene_RNA_status	TF_RNA_status	coherence_class	chromatin_state_label	is_promoter	is_gene_body	H3K4me3_overlap	H3K27ac_overlap	H3K4me1_overlap	H3K27me3_overlap	H3K9me3_overlap	H3K36me3_overlap	chromatin_state_support	coherence_support	TF_RNA_support	final_edge_score	ENCODE4_cCRE_overlap	ENCODE4_cCRE_n	ENCODE4_registry_id	ENCODE4_cCRE_id	ENCODE4_cCRE_class	ENCODE4_cCRE_class_list	ENCODE4_cCRE_id_list
peak_0048806	FOSL1	Closing	Fra1	FOSL1	known4.motif	chr21	34526436	34527252	RCAN1	-1.3473	5.00017e-08	promoter-TSS (NM_203418)	-22	promoter	-3.50625	1.67652e-13	3.50625	concordant_down	5	-2.84522	0.0038438	yes	gene_down	TF_down	coherent_activation_loss	active_promoter	1	0	1	1	1	0	0	0	2	2	2	11	yes	2	EH38D3337389	EH38E2138804	pELS	pELS;PLS	EH38E2138804;EH38E3456316
peak_0048806	IRF4	Closing	IRF4	IRF4	known28.motif	chr21	34526436	34527252	RCAN1	-1.3473	5.00017e-08	promoter-TSS (NM_203418)	-22	promoter	-3.50625	1.67652e-13	3.50625	concordant_down	5	-1.96215	1.03297e-08	yes	gene_down	TF_down	coherent_activation_loss	active_promoter	1	0	1	1	1	0	0	0	2	2	2	11	yes	2	EH38D3337389	EH38E2138804	pELS	pELS;PLS	EH38E2138804;EH38E3456316
peak_0048806	NFATC1	Closing	NFAT:AP1	NFATC1;NFATC2;NFATC3;NFATC4;JUN;FOS;BATF	known1.motif	chr21	34526436	34527252	RCAN1	-1.3473	5.00017e-08	promoter-TSS (NM_203418)	-22	promoter	-3.50625	1.67652e-13	3.50625	concordant_down	5	-0.764829	0.0475296	yes	gene_down	TF_down	coherent_activation_loss	active_promoter	1	0	1	1	1	0	0	0	2	2	2	11	yes	2	EH38D3337389	EH38E2138804	pELS	pELS;PLS	EH38E2138804;EH38E3456316
peak_0048806	NFATC1	Closing	NFAT	NFATC1;NFATC2;NFATC3;NFATC4	known2.motif	chr21	34526436	34527252	RCAN1	-1.3473	5.00017e-08	promoter-TSS (NM_203418)	-22	promoter	-3.50625	1.67652e-13	3.50625	concordant_down	5	-0.764829	0.0475296	yes	gene_down	TF_down	coherent_activation_loss	active_promoter	1	0	1	1	1	0	0	0	2	2	2	11	yes	2	EH38D3337389	EH38E2138804	pELS	pELS;PLS	EH38E2138804;EH38E3456316
peak_0046191	ASCL1	Opening	Ascl1	ASCL1	known1.motif	chr20	3799029	3800058	CDC25B	1.04129	3.02948e-06	promoter-TSS (NM_001287524)	-518	promoter	1.36346	9.53513e-05	1.36346	concordant_up	5	0	1	yes	gene_up	TF_not_significant	coherent_activation_gain	active_promoter	1	0	1	1	1	0	0	1	2	2	1	10	yes	3	EH38D3271888	EH38E2093747	dELS	dELS	EH38E2093747;EH38E2093749;EH38E3417262
peak_0046191	ASCL2	Opening	Ascl2	ASCL2	known13.motif	chr20	3799029	3800058	CDC25B	1.04129	3.02948e-06	promoter-TSS (NM_001287524)	-518	promoter	1.36346	9.53513e-05	1.36346	concordant_up	5	0.302007	1	yes	gene_up	TF_not_significant	coherent_activation_gain	active_promoter	1	0	1	1	1	0	0	1	2	2	1	10	yes	3	EH38D3271888	EH38E2093747	dELS	dELS	EH38E2093747;EH38E2093749;EH38E3417262
peak_0046191	ELF4	Opening	Elf4	ELF4	known16.motif	chr20	3799029	3800058	CDC25B	1.04129	3.02948e-06	promoter-TSS (NM_001287524)	-518	promoter	1.36346	9.53513e-05	1.36346	concordant_up	5	0.216507	0.71809	yes	gene_up	TF_not_significant	coherent_activation_gain	active_promoter	1	0	1	1	1	0	0	1	2	2	1	10	yes	3	EH38D3271888	EH38E2093747	dELS	dELS	EH38E2093747;EH38E2093749;EH38E3417262
peak_0046191	ELF5	Opening	ELF5	ELF5	known20.motif	chr20	3799029	3800058	CDC25B	1.04129	3.02948e-06	promoter-TSS (NM_001287524)	-518	promoter	1.36346	9.53513e-05	1.36346	concordant_up	5	0	1	yes	gene_up	TF_not_significant	coherent_activation_gain	active_promoter	1	0	1	1	1	0	0	1	2	2	1	10	yes	3	EH38D3271888	EH38E2093747	dELS	dELS	EH38E2093747;EH38E2093749;EH38E3417262
peak_0046191	EOMES	Opening	Eomes	EOMES	known21.motif	chr20	3799029	3800058	CDC25B	1.04129	3.02948e-06	promoter-TSS (NM_001287524)	-518	promoter	1.36346	9.53513e-05	1.36346	concordant_up	5	0	1	yes	gene_up	TF_not_significant	coherent_activation_gain	active_promoter	1	0	1	1	1	0	0	1	2	2	1	10	yes	3	EH38D3271888	EH38E2093747	dELS	dELS	EH38E2093747;EH38E2093749;EH38E3417262
peak_0046191	ERG	Opening	ERG	ERG	known8.motif	chr20	3799029	3800058	CDC25B	1.04129	3.02948e-06	promoter-TSS (NM_001287524)	-518	promoter	1.36346	9.53513e-05	1.36346	concordant_up	5	0.605698	1	yes	gene_up	TF_not_significant	coherent_activation_gain	active_promoter	1	0	1	1	1	0	0	1	2	2	1	10	yes	3	EH38D3271888	EH38E2093747	dELS	dELS	EH38E2093747;EH38E2093749;EH38E3417262
peak_0046191	ETV2	Opening	Etv2	ETV2	known3.motif	chr20	3799029	3800058	CDC25B	1.04129	3.02948e-06	promoter-TSS (NM_001287524)	-518	promoter	1.36346	9.53513e-05	1.36346	concordant_up	5	-0.123413	1	yes	gene_up	TF_not_significant	coherent_activation_gain	active_promoter	1	0	1	1	1	0	0	1	2	2	1	10	yes	3	EH38D3271888	EH38E2093747	dELS	dELS	EH38E2093747;EH38E2093749;EH38E3417262
peak_0046191	FLI1	Opening	EWS:FLI1-fusion	FLI1	known14.motif	chr20	3799029	3800058	CDC25B	1.04129	3.02948e-06	promoter-TSS (NM_001287524)	-518	promoter	1.36346	9.53513e-05	1.36346	concordant_up	5	0.453465	0.170815	yes	gene_up	TF_not_significant	coherent_activation_gain	active_promoter	1	0	1	1	1	0	0	1	2	2	1	10	yes	3	EH38D3271888	EH38E2093747	dELS	dELS	EH38E2093747;EH38E2093749;EH38E3417262
peak_0046191	GABPA	Opening	GABPA	GABPA	known9.motif	chr20	3799029	3800058	CDC25B	1.04129	3.02948e-06	promoter-TSS (NM_001287524)	-518	promoter	1.36346	9.53513e-05	1.36346	concordant_up	5	-0.175586	0.446906	yes	gene_up	TF_not_significant	coherent_activation_gain	active_promoter	1	0	1	1	1	0	0	1	2	2	1	10	yes	3	EH38D3271888	EH38E2093747	dELS	dELS	EH38E2093747;EH38E2093749;EH38E3417262
peak_0046191	JUN	Opening	EWS:ERG-fusion	EWS;ERG-FUSION;JUN;FOS;JUNB;FOSL1;FOSL2	known6.motif	chr20	3799029	3800058	CDC25B	1.04129	3.02948e-06	promoter-TSS (NM_001287524)	-518	promoter	1.36346	9.53513e-05	1.36346	concordant_up	5	0.329662	1	yes	gene_up	TF_not_significant	coherent_activation_gain	active_promoter	1	0	1	1	1	0	0	1	2	2	1	10	yes	3	EH38D3271888	EH38E2093747	dELS	dELS	EH38E2093747;EH38E2093749;EH38E3417262
peak_0046191	POU2F2	Opening	Oct2	POU2F2	known2.motif	chr20	3799029	3800058	CDC25B	1.04129	3.02948e-06	promoter-TSS (NM_001287524)	-518	promoter	1.36346	9.53513e-05	1.36346	concordant_up	5	-0.371429	0.104995	yes	gene_up	TF_not_significant	coherent_activation_gain	active_promoter	1	0	1	1	1	0	0	1	2	2	1	10	yes	3	EH38D3271888	EH38E2093747	dELS	dELS	EH38E2093747;EH38E2093749;EH38E3417262
peak_0046191	POU2F3	Opening	Oct11	POU2F3	known5.motif	chr20	3799029	3800058	CDC25B	1.04129	3.02948e-06	promoter-TSS (NM_001287524)	-518	promoter	1.36346	9.53513e-05	1.36346	concordant_up	5	-1.36363	1	yes	gene_up	TF_not_significant	coherent_activation_gain	active_promoter	1	0	1	1	1	0	0	1	2	2	1	10	yes	3	EH38D3271888	EH38E2093747	dELS	dELS	EH38E2093747;EH38E2093749;EH38E3417262
peak_0046191	SNAI1	Opening	Snail1	SNAI1	known12.motif	chr20	3799029	3800058	CDC25B	1.04129	3.02948e-06	promoter-TSS (NM_001287524)	-518	promoter	1.36346	9.53513e-05	1.36346	concordant_up	5	-0.628517	1	yes	gene_up	TF_not_significant	coherent_activation_gain	active_promoter	1	0	1	1	1	0	0	1	2	2	1	10	yes	3	EH38D3271888	EH38E2093747	dELS	dELS	EH38E2093747;EH38E2093749;EH38E3417262
peak_0046191	SNAI2	Opening	Slug	SNAI2	known15.motif	chr20	3799029	3800058	CDC25B	1.04129	3.02948e-06	promoter-TSS (NM_001287524)	-518	promoter	1.36346	9.53513e-05	1.36346	concordant_up	5	0	1	yes	gene_up	TF_not_significant	coherent_activation_gain	active_promoter	1	0	1	1	1	0	0	1	2	2	1	10	yes	3	EH38D3271888	EH38E2093747	dELS	dELS	EH38E2093747;EH38E2093749;EH38E3417262
peak_0046191	SPI1	Opening	PU.1	SPI1	known17.motif	chr20	3799029	3800058	CDC25B	1.04129	3.02948e-06	promoter-TSS (NM_001287524)	-518	promoter	1.36346	9.53513e-05	1.36346	concordant_up	5	0.124323	1	yes	gene_up	TF_not_significant	coherent_activation_gain	active_promoter	1	0	1	1	1	0	0	1	2	2	1	10	yes	3	EH38D3271888	EH38E2093747	dELS	dELS	EH38E2093747;EH38E2093749;EH38E3417262
peak_0046191	TCF12	Opening	HEB	TCF12	known4.motif	chr20	3799029	3800058	CDC25B	1.04129	3.02948e-06	promoter-TSS (NM_001287524)	-518	promoter	1.36346	9.53513e-05	1.36346	concordant_up	5	-0.264223	0.326118	yes	gene_up	TF_not_significant	coherent_activation_gain	active_promoter	1	0	1	1	1	0	0	1	2	2	1	10	yes	3	EH38D3271888	EH38E2093747	dELS	dELS	EH38E2093747;EH38E2093749;EH38E3417262
peak_0046191	TCF3	Opening	E2A	TCF3	known10.motif	chr20	3799029	3800058	CDC25B	1.04129	3.02948e-06	promoter-TSS (NM_001287524)	-518	promoter	1.36346	9.53513e-05	1.36346	concordant_up	5	0.218273	1	yes	gene_up	TF_not_significant	coherent_activation_gain	active_promoter	1	0	1	1	1	0	0	1	2	2	1	10	yes	3	EH38D3271888	EH38E2093747	dELS	dELS	EH38E2093747;EH38E2093749;EH38E3417262
peak_0046191	TCF3	Opening	E2A	TCF3	known11.motif	chr20	3799029	3800058	CDC25B	1.04129	3.02948e-06	promoter-TSS (NM_001287524)	-518	promoter	1.36346	9.53513e-05	1.36346	concordant_up	5	0.218273	1	yes	gene_up	TF_not_significant	coherent_activation_gain	active_promoter	1	0	1	1	1	0	0	1	2	2	1	10	yes	3	EH38D3271888	EH38E2093747	dELS	dELS	EH38E2093747;EH38E2093749;EH38E3417262
peak_0046643	ATF3	Closing	Atf3	ATF3	known9.motif	chr20	24948838	24949496	CST7	-1.16124	0.000553991	promoter-TSS (NM_003650)	-102	promoter	-4.06678	0.0483539	4.06678	concordant_down	5	-3.92028	0.000169874	yes	gene_down	TF_down	coherent_activation_loss	bivalent_promoter	1	0	1	1	1	1	1	1	1	2	2	10	yes	3	EH38D5317793	EH38E3425468	pELS	pELS;PLS	EH38E3425468;EH38E3425470;EH38E4258598
peak_0046643	FOSL1	Closing	Fra1	FOSL1	known4.motif	chr20	24948838	24949496	CST7	-1.16124	0.000553991	promoter-TSS (NM_003650)	-102	promoter	-4.06678	0.0483539	4.06678	concordant_down	5	-2.84522	0.0038438	yes	gene_down	TF_down	coherent_activation_loss	bivalent_promoter	1	0	1	1	1	1	1	1	1	2	2	10	yes	3	EH38D5317793	EH38E3425468	pELS	pELS;PLS	EH38E3425468;EH38E3425470;EH38E4258598
peak_0046643	FOSL2	Closing	Fra2	FOSL2	known11.motif	chr20	24948838	24949496	CST7	-1.16124	0.000553991	promoter-TSS (NM_003650)	-102	promoter	-4.06678	0.0483539	4.06678	concordant_down	5	-2.94385	0.00157751	yes	gene_down	TF_down	coherent_activation_loss	bivalent_promoter	1	0	1	1	1	1	1	1	1	2	2	10	yes	3	EH38D5317793	EH38E3425468	pELS	pELS;PLS	EH38E3425468;EH38E3425470;EH38E4258598
peak_0026689	NFATC1	Closing	NFAT	NFATC1;NFATC2;NFATC3;NFATC4	known2.motif	chr15	79091403	79091857	RASGRF1	-1.22727	0.000441191	promoter-TSS (NM_002891)	-850	promoter	-1.13292	0.00566006	1.13292	concordant_down	5	-0.764829	0.0475296	yes	gene_down	TF_down	coherent_activation_loss	bivalent_promoter	1	0	1	1	1	1	0	0	1	2	2	10	yes	2	EH38D4897296	EH38E3149157	pELS	pELS	EH38E3149157;EH38E3149158
peak_0026689	NFKB1	Closing	NFkB-p65	NFKB1;RELA;RELB;NFKB2;REL	known10.motif	chr15	79091403	79091857	RASGRF1	-1.22727	0.000441191	promoter-TSS (NM_002891)	-850	promoter	-1.13292	0.00566006	1.13292	concordant_down	5	-1.24321	1.12356e-09	yes	gene_down	TF_down	coherent_activation_loss	bivalent_promoter	1	0	1	1	1	1	0	0	1	2	2	10	yes	2	EH38D4897296	EH38E3149157	pELS	pELS	EH38E3149157;EH38E3149158
peak_0048806	ASCL2	Closing	Ascl2	ASCL2	known104.motif	chr21	34526436	34527252	RCAN1	-1.3473	5.00017e-08	promoter-TSS (NM_203418)	-22	promoter	-3.50625	1.67652e-13	3.50625	concordant_down	5	0.302007	1	yes	gene_down	TF_not_significant	coherent_activation_loss	active_promoter	1	0	1	1	1	0	0	0	2	2	1	10	yes	2	EH38D3337389	EH38E2138804	pELS	pELS;PLS	EH38E2138804;EH38E3456316
peak_0048806	ATF1	Closing	Atf1	ATF1	known51.motif	chr21	34526436	34527252	RCAN1	-1.3473	5.00017e-08	promoter-TSS (NM_203418)	-22	promoter	-3.50625	1.67652e-13	3.50625	concordant_down	5	-0.140149	1	yes	gene_down	TF_not_significant	coherent_activation_loss	active_promoter	1	0	1	1	1	0	0	0	2	2	1	10	yes	2	EH38D3337389	EH38E2138804	pELS	pELS;PLS	EH38E2138804;EH38E3456316
peak_0048806	ATF2	Closing	Atf2	ATF2	known58.motif	chr21	34526436	34527252	RCAN1	-1.3473	5.00017e-08	promoter-TSS (NM_203418)	-22	promoter	-3.50625	1.67652e-13	3.50625	concordant_down	5	-0.14068	0.757734	yes	gene_down	TF_not_significant	coherent_activation_loss	active_promoter	1	0	1	1	1	0	0	0	2	2	1	10	yes	2	EH38D3337389	EH38E2138804	pELS	pELS;PLS	EH38E2138804;EH38E3456316
peak_0048806	ATF7	Closing	Atf7	ATF7	known43.motif	chr21	34526436	34527252	RCAN1	-1.3473	5.00017e-08	promoter-TSS (NM_203418)	-22	promoter	-3.50625	1.67652e-13	3.50625	concordant_down	5	0.0262107	1	yes	gene_down	TF_not_significant	coherent_activation_loss	active_promoter	1	0	1	1	1	0	0	0	2	2	1	10	yes	2	EH38D3337389	EH38E2138804	pELS	pELS;PLS	EH38E2138804;EH38E3456316
peak_0048806	ATOH1	Closing	Atoh1	ATOH1	known102.motif	chr21	34526436	34527252	RCAN1	-1.3473	5.00017e-08	promoter-TSS (NM_203418)	-22	promoter	-3.50625	1.67652e-13	3.50625	concordant_down	5	0	1	yes	gene_down	TF_not_significant	coherent_activation_loss	active_promoter	1	0	1	1	1	0	0	0	2	2	1	10	yes	2	EH38D3337389	EH38E2138804	pELS	pELS;PLS	EH38E2138804;EH38E3456316
peak_0048806	BACH2	Closing	Bach2	BACH2	known31.motif	chr21	34526436	34527252	RCAN1	-1.3473	5.00017e-08	promoter-TSS (NM_203418)	-22	promoter	-3.50625	1.67652e-13	3.50625	concordant_down	5	0.0555713	1	yes	gene_down	TF_not_significant	coherent_activation_loss	active_promoter	1	0	1	1	1	0	0	0	2	2	1	10	yes	2	EH38D3337389	EH38E2138804	pELS	pELS;PLS	EH38E2138804;EH38E3456316
peak_0048806	BATF	Closing	BATF	BATF	known3.motif	chr21	34526436	34527252	RCAN1	-1.3473	5.00017e-08	promoter-TSS (NM_203418)	-22	promoter	-3.50625	1.67652e-13	3.50625	concordant_down	5	-0.596918	0.292535	yes	gene_down	TF_not_significant	coherent_activation_loss	active_promoter	1	0	1	1	1	0	0	0	2	2	1	10	yes	2	EH38D3337389	EH38E2138804	pELS	pELS;PLS	EH38E2138804;EH38E3456316
peak_0048806	BHLHA15	Closing	BHLHA15	BHLHA15	known92.motif	chr21	34526436	34527252	RCAN1	-1.3473	5.00017e-08	promoter-TSS (NM_203418)	-22	promoter	-3.50625	1.67652e-13	3.50625	concordant_down	5	-0.00604192	1	yes	gene_down	TF_not_significant	coherent_activation_loss	active_promoter	1	0	1	1	1	0	0	0	2	2	1	10	yes	2	EH38D3337389	EH38E2138804	pELS	pELS;PLS	EH38E2138804;EH38E3456316
peak_0048806	CREB5	Closing	CREB5	CREB5	known49.motif	chr21	34526436	34527252	RCAN1	-1.3473	5.00017e-08	promoter-TSS (NM_203418)	-22	promoter	-3.50625	1.67652e-13	3.50625	concordant_down	5	-1.92657	1	yes	gene_down	TF_not_significant	coherent_activation_loss	active_promoter	1	0	1	1	1	0	0	0	2	2	1	10	yes	2	EH38D3337389	EH38E2138804	pELS	pELS;PLS	EH38E2138804;EH38E3456316
peak_0048806	EBF2	Closing	EBF2	EBF2	known105.motif	chr21	34526436	34527252	RCAN1	-1.3473	5.00017e-08	promoter-TSS (NM_203418)	-22	promoter	-3.50625	1.67652e-13	3.50625	concordant_down	5	0	1	yes	gene_down	TF_not_significant	coherent_activation_loss	active_promoter	1	0	1	1	1	0	0	0	2	2	1	10	yes	2	EH38D3337389	EH38E2138804	pELS	pELS;PLS	EH38E2138804;EH38E3456316
peak_0048806	ETV1	Closing	ETV1	ETV1	known68.motif	chr21	34526436	34527252	RCAN1	-1.3473	5.00017e-08	promoter-TSS (NM_203418)	-22	promoter	-3.50625	1.67652e-13	3.50625	concordant_down	5	-0.476315	1	yes	gene_down	TF_not_significant	coherent_activation_loss	active_promoter	1	0	1	1	1	0	0	0	2	2	1	10	yes	2	EH38D3337389	EH38E2138804	pELS	pELS;PLS	EH38E2138804;EH38E3456316
peak_0048806	GFI1B	Closing	Gfi1b	GFI1B	known130.motif	chr21	34526436	34527252	RCAN1	-1.3473	5.00017e-08	promoter-TSS (NM_203418)	-22	promoter	-3.50625	1.67652e-13	3.50625	concordant_down	5	0.0233349	1	yes	gene_down	TF_not_significant	coherent_activation_loss	active_promoter	1	0	1	1	1	0	0	0	2	2	1	10	yes	2	EH38D3337389	EH38E2138804	pELS	pELS;PLS	EH38E2138804;EH38E3456316
peak_0048806	IRF1	Closing	IRF1	IRF1	known42.motif	chr21	34526436	34527252	RCAN1	-1.3473	5.00017e-08	promoter-TSS (NM_203418)	-22	promoter	-3.50625	1.67652e-13	3.50625	concordant_down	5	-0.0697303	1	yes	gene_down	TF_not_significant	coherent_activation_loss	active_promoter	1	0	1	1	1	0	0	0	2	2	1	10	yes	2	EH38D3337389	EH38E2138804	pELS	pELS;PLS	EH38E2138804;EH38E3456316
peak_0048806	IRF2	Closing	IRF2	IRF2	known50.motif	chr21	34526436	34527252	RCAN1	-1.3473	5.00017e-08	promoter-TSS (NM_203418)	-22	promoter	-3.50625	1.67652e-13	3.50625	concordant_down	5	-0.203996	0.786722	yes	gene_down	TF_not_significant	coherent_activation_loss	active_promoter	1	0	1	1	1	0	0	0	2	2	1	10	yes	2	EH38D3337389	EH38E2138804	pELS	pELS;PLS	EH38E2138804;EH38E3456316
peak_0048806	IRF3	Closing	IRF3	IRF3	known35.motif	chr21	34526436	34527252	RCAN1	-1.3473	5.00017e-08	promoter-TSS (NM_203418)	-22	promoter	-3.50625	1.67652e-13	3.50625	concordant_down	5	0.497583	0.0732312	yes	gene_down	TF_not_significant	coherent_activation_loss	active_promoter	1	0	1	1	1	0	0	0	2	2	1	10	yes	2	EH38D3337389	EH38E2138804	pELS	pELS;PLS	EH38E2138804;EH38E3456316
peak_0048806	IRF8	Closing	IRF8	IRF8	known33.motif	chr21	34526436	34527252	RCAN1	-1.3473	5.00017e-08	promoter-TSS (NM_203418)	-22	promoter	-3.50625	1.67652e-13	3.50625	concordant_down	5	0.319825	0.975928	yes	gene_down	TF_not_significant	coherent_activation_loss	active_promoter	1	0	1	1	1	0	0	0	2	2	1	10	yes	2	EH38D3337389	EH38E2138804	pELS	pELS;PLS	EH38E2138804;EH38E3456316
peak_0048806	JUN	Closing	AP-1	JUN;FOS;JUNB;JUND;FOSL1;FOSL2;ATF3;BATF	known7.motif	chr21	34526436	34527252	RCAN1	-1.3473	5.00017e-08	promoter-TSS (NM_203418)	-22	promoter	-3.50625	1.67652e-13	3.50625	concordant_down	5	0.329662	1	yes	gene_down	TF_not_significant	coherent_activation_loss	active_promoter	1	0	1	1	1	0	0	0	2	2	1	10	yes	2	EH38D3337389	EH38E2138804	pELS	pELS;PLS	EH38E2138804;EH38E3456316
peak_0048806	JUNB	Closing	JunB	JUNB	known6.motif	chr21	34526436	34527252	RCAN1	-1.3473	5.00017e-08	promoter-TSS (NM_203418)	-22	promoter	-3.50625	1.67652e-13	3.50625	concordant_down	5	0.338285	1	yes	gene_down	TF_not_significant	coherent_activation_loss	active_promoter	1	0	1	1	1	0	0	0	2	2	1	10	yes	2	EH38D3337389	EH38E2138804	pELS	pELS;PLS	EH38E2138804;EH38E3456316
peak_0048806	MYB	Closing	MYB	MYB	known106.motif	chr21	34526436	34527252	RCAN1	-1.3473	5.00017e-08	promoter-TSS (NM_203418)	-22	promoter	-3.50625	1.67652e-13	3.50625	concordant_down	5	-0.131766	1	yes	gene_down	TF_not_significant	coherent_activation_loss	active_promoter	1	0	1	1	1	0	0	0	2	2	1	10	yes	2	EH38D3337389	EH38E2138804	pELS	pELS;PLS	EH38E2138804;EH38E3456316
peak_0048806	MYF5	Closing	Myf5	MYF5	known96.motif	chr21	34526436	34527252	RCAN1	-1.3473	5.00017e-08	promoter-TSS (NM_203418)	-22	promoter	-3.50625	1.67652e-13	3.50625	concordant_down	5	0.592571	1	yes	gene_down	TF_not_significant	coherent_activation_loss	active_promoter	1	0	1	1	1	0	0	0	2	2	1	10	yes	2	EH38D3337389	EH38E2138804	pELS	pELS;PLS	EH38E2138804;EH38E3456316
peak_0048806	NEUROG2	Closing	NeuroG2	NEUROG2	known116.motif	chr21	34526436	34527252	RCAN1	-1.3473	5.00017e-08	promoter-TSS (NM_203418)	-22	promoter	-3.50625	1.67652e-13	3.50625	concordant_down	5	-0.836985	1	yes	gene_down	TF_not_significant	coherent_activation_loss	active_promoter	1	0	1	1	1	0	0	0	2	2	1	10	yes	2	EH38D3337389	EH38E2138804	pELS	pELS;PLS	EH38E2138804;EH38E3456316
peak_0048806	NFIL3	Closing	NFIL3	NFIL3	known38.motif	chr21	34526436	34527252	RCAN1	-1.3473	5.00017e-08	promoter-TSS (NM_203418)	-22	promoter	-3.50625	1.67652e-13	3.50625	concordant_down	5	-0.00380348	1	yes	gene_down	TF_not_significant	coherent_activation_loss	active_promoter	1	0	1	1	1	0	0	0	2	2	1	10	yes	2	EH38D3337389	EH38E2138804	pELS	pELS;PLS	EH38E2138804;EH38E3456316
peak_0048806	PAX5	Closing	PAX5	PAX5	known135.motif	chr21	34526436	34527252	RCAN1	-1.3473	5.00017e-08	promoter-TSS (NM_203418)	-22	promoter	-3.50625	1.67652e-13	3.50625	concordant_down	5	-0.192664	1	yes	gene_down	TF_not_significant	coherent_activation_loss	active_promoter	1	0	1	1	1	0	0	0	2	2	1	10	yes	2	EH38D3337389	EH38E2138804	pELS	pELS;PLS	EH38E2138804;EH38E3456316
peak_0048806	PAX8	Closing	Pax8	PAX8	known84.motif	chr21	34526436	34527252	RCAN1	-1.3473	5.00017e-08	promoter-TSS (NM_203418)	-22	promoter	-3.50625	1.67652e-13	3.50625	concordant_down	5	0.0163715	1	yes	gene_down	TF_not_significant	coherent_activation_loss	active_promoter	1	0	1	1	1	0	0	0	2	2	1	10	yes	2	EH38D3337389	EH38E2138804	pELS	pELS;PLS	EH38E2138804;EH38E3456316
peak_0048806	POU3F3	Closing	Brn1	POU3F3	known19.motif	chr21	34526436	34527252	RCAN1	-1.3473	5.00017e-08	promoter-TSS (NM_203418)	-22	promoter	-3.50625	1.67652e-13	3.50625	concordant_down	5	1.01905	1	yes	gene_down	TF_not_significant	coherent_activation_loss	active_promoter	1	0	1	1	1	0	0	0	2	2	1	10	yes	2	EH38D3337389	EH38E2138804	pELS	pELS;PLS	EH38E2138804;EH38E3456316
peak_0048806	POU5F1	Closing	Oct4	POU5F1	known20.motif	chr21	34526436	34527252	RCAN1	-1.3473	5.00017e-08	promoter-TSS (NM_203418)	-22	promoter	-3.50625	1.67652e-13	3.50625	concordant_down	5	0.714636	1	yes	gene_down	TF_not_significant	coherent_activation_loss	active_promoter	1	0	1	1	1	0	0	0	2	2	1	10	yes	2	EH38D3337389	EH38E2138804	pELS	pELS;PLS	EH38E2138804;EH38E3456316
peak_0048806	PRDM1	Closing	PRDM1	PRDM1	known73.motif	chr21	34526436	34527252	RCAN1	-1.3473	5.00017e-08	promoter-TSS (NM_203418)	-22	promoter	-3.50625	1.67652e-13	3.50625	concordant_down	5	-0.506444	1	yes	gene_down	TF_not_significant	coherent_activation_loss	active_promoter	1	0	1	1	1	0	0	0	2	2	1	10	yes	2	EH38D3337389	EH38E2138804	pELS	pELS;PLS	EH38E2138804;EH38E3456316
peak_0048806	RUNX1	Closing	RUNX1	RUNX1	known27.motif	chr21	34526436	34527252	RCAN1	-1.3473	5.00017e-08	promoter-TSS (NM_203418)	-22	promoter	-3.50625	1.67652e-13	3.50625	concordant_down	5	-0.107419	1	yes	gene_down	TF_not_significant	coherent_activation_loss	active_promoter	1	0	1	1	1	0	0	0	2	2	1	10	yes	2	EH38D3337389	EH38E2138804	pELS	pELS;PLS	EH38E2138804;EH38E3456316
peak_0048806	TCF12	Closing	Tcf12	TCF12	known76.motif	chr21	34526436	34527252	RCAN1	-1.3473	5.00017e-08	promoter-TSS (NM_203418)	-22	promoter	-3.50625	1.67652e-13	3.50625	concordant_down	5	-0.264223	0.326118	yes	gene_down	TF_not_significant	coherent_activation_loss	active_promoter	1	0	1	1	1	0	0	0	2	2	1	10	yes	2	EH38D3337389	EH38E2138804	pELS	pELS;PLS	EH38E2138804;EH38E3456316
peak_0048806	TCF4	Closing	TCF4	TCF4	known128.motif	chr21	34526436	34527252	RCAN1	-1.3473	5.00017e-08	promoter-TSS (NM_203418)	-22	promoter	-3.50625	1.67652e-13	3.50625	concordant_down	5	-0.0799037	1	yes	gene_down	TF_not_significant	coherent_activation_loss	active_promoter	1	0	1	1	1	0	0	0	2	2	1	10	yes	2	EH38D3337389	EH38E2138804	pELS	pELS;PLS	EH38E2138804;EH38E3456316
peak_0048806	ZNF189	Closing	ZNF189	ZNF189	known112.motif	chr21	34526436	34527252	RCAN1	-1.3473	5.00017e-08	promoter-TSS (NM_203418)	-22	promoter	-3.50625	1.67652e-13	3.50625	concordant_down	5	-0.0296017	1	yes	gene_down	TF_not_significant	coherent_activation_loss	active_promoter	1	0	1	1	1	0	0	0	2	2	1	10	yes	2	EH38D3337389	EH38E2138804	pELS	pELS;PLS	EH38E2138804;EH38E3456316
peak_0046766	NFATC1	Closing	NFAT:AP1	NFATC1;NFATC2;NFATC3;NFATC4;JUN;FOS;BATF	known1.motif	chr20	31717267	31718045	ABALON	-2.00694	5.42814e-07	intron (NR_134257, intron 1 of 2)	-3851	gene_body	-1.17015	8.87082e-08	1.17015	concordant_down	4	-0.764829	0.0475296	yes	gene_down	TF_down	coherent_activation_loss	active_enhancer	0	1	1	1	1	0	0	0	2	2	2	10	yes	3	EH38D5320152	EH38E3426905	dELS	dELS	EH38E3426905;EH38E3426906;EH38E4259202
peak_0046766	NFATC1	Closing	NFAT	NFATC1;NFATC2;NFATC3;NFATC4	known2.motif	chr20	31717267	31718045	ABALON	-2.00694	5.42814e-07	intron (NR_134257, intron 1 of 2)	-3851	gene_body	-1.17015	8.87082e-08	1.17015	concordant_down	4	-0.764829	0.0475296	yes	gene_down	TF_down	coherent_activation_loss	active_enhancer	0	1	1	1	1	0	0	0	2	2	2	10	yes	3	EH38D5320152	EH38E3426905	dELS	dELS	EH38E3426905;EH38E3426906;EH38E4259202
peak_0046766	NFKB1	Closing	NFkB-p65	NFKB1;RELA;RELB;NFKB2;REL	known10.motif	chr20	31717267	31718045	ABALON	-2.00694	5.42814e-07	intron (NR_134257, intron 1 of 2)	-3851	gene_body	-1.17015	8.87082e-08	1.17015	concordant_down	4	-1.24321	1.12356e-09	yes	gene_down	TF_down	coherent_activation_loss	active_enhancer	0	1	1	1	1	0	0	0	2	2	2	10	yes	3	EH38D5320152	EH38E3426905	dELS	dELS	EH38E3426905;EH38E3426906;EH38E4259202
peak_0046766	NFKB1	Closing	NFkB-p50,p52	NFKB1;NFKB2	known13.motif	chr20	31717267	31718045	ABALON	-2.00694	5.42814e-07	intron (NR_134257, intron 1 of 2)	-3851	gene_body	-1.17015	8.87082e-08	1.17015	concordant_down	4	-1.24321	1.12356e-09	yes	gene_down	TF_down	coherent_activation_loss	active_enhancer	0	1	1	1	1	0	0	0	2	2	2	10	yes	3	EH38D5320152	EH38E3426905	dELS	dELS	EH38E3426905;EH38E3426906;EH38E4259202
peak_0015238	ATF3	Closing	Atf3	ATF3	known9.motif	chr11	120431769	120432728	ARHGEF12	-1.30818	3.02948e-06	intron (NM_015313, intron 11 of 40)	46922	gene_body	-1.17686	7.40095e-08	1.17686	concordant_down	4	-3.92028	0.000169874	yes	gene_down	TF_down	coherent_activation_loss	active_enhancer	0	1	0	1	1	0	0	0	2	2	2	10	yes	2	EH38D4651594	EH38E2989640	dELS	dELS	EH38E2989640;EH38E2989641
peak_0015238	FOSL1	Closing	Fra1	FOSL1	known4.motif	chr11	120431769	120432728	ARHGEF12	-1.30818	3.02948e-06	intron (NM_015313, intron 11 of 40)	46922	gene_body	-1.17686	7.40095e-08	1.17686	concordant_down	4	-2.84522	0.0038438	yes	gene_down	TF_down	coherent_activation_loss	active_enhancer	0	1	0	1	1	0	0	0	2	2	2	10	yes	2	EH38D4651594	EH38E2989640	dELS	dELS	EH38E2989640;EH38E2989641
peak_0015238	FOSL2	Closing	Fra2	FOSL2	known11.motif	chr11	120431769	120432728	ARHGEF12	-1.30818	3.02948e-06	intron (NM_015313, intron 11 of 40)	46922	gene_body	-1.17686	7.40095e-08	1.17686	concordant_down	4	-2.94385	0.00157751	yes	gene_down	TF_down	coherent_activation_loss	active_enhancer	0	1	0	1	1	0	0	0	2	2	2	10	yes	2	EH38D4651594	EH38E2989640	dELS	dELS	EH38E2989640;EH38E2989641
peak_0015238	FOSL2	Closing	Fosl2	FOSL2	known8.motif	chr11	120431769	120432728	ARHGEF12	-1.30818	3.02948e-06	intron (NM_015313, intron 11 of 40)	46922	gene_body	-1.17686	7.40095e-08	1.17686	concordant_down	4	-2.94385	0.00157751	yes	gene_down	TF_down	coherent_activation_loss	active_enhancer	0	1	0	1	1	0	0	0	2	2	2	10	yes	2	EH38D4651594	EH38E2989640	dELS	dELS	EH38E2989640;EH38E2989641
peak_0015238	IRF4	Closing	IRF4	IRF4	known28.motif	chr11	120431769	120432728	ARHGEF12	-1.30818	3.02948e-06	intron (NM_015313, intron 11 of 40)	46922	gene_body	-1.17686	7.40095e-08	1.17686	concordant_down	4	-1.96215	1.03297e-08	yes	gene_down	TF_down	coherent_activation_loss	active_enhancer	0	1	0	1	1	0	0	0	2	2	2	10	yes	2	EH38D4651594	EH38E2989640	dELS	dELS	EH38E2989640;EH38E2989641
peak_0015238	NFKB1	Closing	NFkB-p65	NFKB1;RELA;RELB;NFKB2;REL	known10.motif	chr11	120431769	120432728	ARHGEF12	-1.30818	3.02948e-06	intron (NM_015313, intron 11 of 40)	46922	gene_body	-1.17686	7.40095e-08	1.17686	concordant_down	4	-1.24321	1.12356e-09	yes	gene_down	TF_down	coherent_activation_loss	active_enhancer	0	1	0	1	1	0	0	0	2	2	2	10	yes	2	EH38D4651594	EH38E2989640	dELS	dELS	EH38E2989640;EH38E2989641
peak_0045586	ATF3	Closing	Atf3	ATF3	known9.motif	chr2	231167942	231168663	ARMC9	-1.59857	2.0737e-05	intron (NM_001191037, intron 22 of 23)	-30328	gene_body	-1.37283	0.0100423	1.37283	concordant_down	4	-3.92028	0.000169874	yes	gene_down	TF_down	coherent_activation_loss	active_enhancer	0	1	0	1	1	0	0	1	2	2	2	10	yes	1	EH38D5287579	EH38E3406016	dELS	dELS	EH38E3406016
peak_0045586	FOSL1	Closing	Fra1	FOSL1	known4.motif	chr2	231167942	231168663	ARMC9	-1.59857	2.0737e-05	intron (NM_001191037, intron 22 of 23)	-30328	gene_body	-1.37283	0.0100423	1.37283	concordant_down	4	-2.84522	0.0038438	yes	gene_down	TF_down	coherent_activation_loss	active_enhancer	0	1	0	1	1	0	0	1	2	2	2	10	yes	1	EH38D5287579	EH38E3406016	dELS	dELS	EH38E3406016
peak_0045586	FOSL2	Closing	Fra2	FOSL2	known11.motif	chr2	231167942	231168663	ARMC9	-1.59857	2.0737e-05	intron (NM_001191037, intron 22 of 23)	-30328	gene_body	-1.37283	0.0100423	1.37283	concordant_down	4	-2.94385	0.00157751	yes	gene_down	TF_down	coherent_activation_loss	active_enhancer	0	1	0	1	1	0	0	1	2	2	2	10	yes	1	EH38D5287579	EH38E3406016	dELS	dELS	EH38E3406016
peak_0045586	NFATC1	Closing	NFAT:AP1	NFATC1;NFATC2;NFATC3;NFATC4;JUN;FOS;BATF	known1.motif	chr2	231167942	231168663	ARMC9	-1.59857	2.0737e-05	intron (NM_001191037, intron 22 of 23)	-30328	gene_body	-1.37283	0.0100423	1.37283	concordant_down	4	-0.764829	0.0475296	yes	gene_down	TF_down	coherent_activation_loss	active_enhancer	0	1	0	1	1	0	0	1	2	2	2	10	yes	1	EH38D5287579	EH38E3406016	dELS	dELS	EH38E3406016
peak_0045586	NFATC1	Closing	NFAT	NFATC1;NFATC2;NFATC3;NFATC4	known2.motif	chr2	231167942	231168663	ARMC9	-1.59857	2.0737e-05	intron (NM_001191037, intron 22 of 23)	-30328	gene_body	-1.37283	0.0100423	1.37283	concordant_down	4	-0.764829	0.0475296	yes	gene_down	TF_down	coherent_activation_loss	active_enhancer	0	1	0	1	1	0	0	1	2	2	2	10	yes	1	EH38D5287579	EH38E3406016	dELS	dELS	EH38E3406016
peak_0045586	TFE3	Closing	TFE3	TFE3	known133.motif	chr2	231167942	231168663	ARMC9	-1.59857	2.0737e-05	intron (NM_001191037, intron 22 of 23)	-30328	gene_body	-1.37283	0.0100423	1.37283	concordant_down	4	-0.309485	0.00608454	yes	gene_down	TF_down	coherent_activation_loss	active_enhancer	0	1	0	1	1	0	0	1	2	2	2	10	yes	1	EH38D5287579	EH38E3406016	dELS	dELS	EH38E3406016
peak_0062605	NFATC1	Closing	NFAT	NFATC1;NFATC2;NFATC3;NFATC4	known2.motif	chr5	132751517	132751819	CCNI2	-2.04871	7.74751e-06	3' UTR (NM_001098811, exon 10 of 10)	4223	gene_body	-1.10802	0.0399294	1.10802	concordant_down	4	-0.764829	0.0475296	yes	gene_down	TF_down	coherent_activation_loss	active_enhancer	0	1	0	1	1	0	0	0	2	2	2	10	yes	2	EH38D3759965	EH38E2408803	dELS	dELS	EH38E2408803;EH38E3660799
peak_0077199	NFATC1	Closing	NFAT	NFATC1;NFATC2;NFATC3;NFATC4	known2.motif	chr9	5451550	5451937	CD274	-1.09432	0.00152554	intron (NR_052005, intron 1 of 7)	1202	gene_body	-1.35172	0.00034583	1.35172	concordant_down	4	-0.764829	0.0475296	yes	gene_down	TF_down	coherent_activation_loss	active_enhancer	0	1	1	1	1	0	0	0	2	2	2	10	yes	2	EH38D6010087	EH38E3872911	pELS	pELS	EH38E3872911;EH38E3872912
peak_0024221	NFATC1	Closing	NFAT	NFATC1;NFATC2;NFATC3;NFATC4	known2.motif	chr14	89436364	89436641	FOXN3-AS1	-1.03528	0.0210027	intron (NM_001085471, intron 1 of 6)	19149	gene_body	-1.5977	0.0010693	1.5977	concordant_down	4	-0.764829	0.0475296	yes	gene_down	TF_down	coherent_activation_loss	active_enhancer	0	1	0	1	1	0	0	0	2	2	2	10	yes	1	EH38D6236075	EH38E4112924	dELS	dELS	EH38E4112924
peak_0069758	NFKB1	Closing	NFkB-p65	NFKB1;RELA;RELB;NFKB2;REL	known10.motif	chr7	18503585	18503827	HDAC9	-1.13613	0.00611166	intron (NM_001321896, intron 3 of 12)	-5564	gene_body	-1.19955	0.0247781	1.19955	concordant_down	4	-1.24321	1.12356e-09	yes	gene_down	TF_down	coherent_activation_loss	active_enhancer	0	1	0	1	1	0	0	0	2	2	2	10	yes	1	EH38D5834436	EH38E3760246	dELS	dELS	EH38E3760246
peak_0004211	EGR2	Closing	Egr2	EGR2	known16.motif	chr1	116628175	116629198	IGSF3	-1.01544	1.28393e-06	intron (NM_001007237, intron 2 of 10)	39046	gene_body	-2.00627	0.0266534	2.00627	concordant_down	4	-5.0555	5.55296e-22	yes	gene_down	TF_down	coherent_activation_loss	active_enhancer	0	1	1	1	1	1	0	0	2	2	2	10	yes	2	EH38D2215459	EH38E1379764	dELS	dELS	EH38E1379764;EH38E2833486
peak_0004211	NFATC1	Closing	NFAT	NFATC1;NFATC2;NFATC3;NFATC4	known2.motif	chr1	116628175	116629198	IGSF3	-1.01544	1.28393e-06	intron (NM_001007237, intron 2 of 10)	39046	gene_body	-2.00627	0.0266534	2.00627	concordant_down	4	-0.764829	0.0475296	yes	gene_down	TF_down	coherent_activation_loss	active_enhancer	0	1	1	1	1	1	0	0	2	2	2	10	yes	2	EH38D2215459	EH38E1379764	dELS	dELS	EH38E1379764;EH38E2833486
peak_0004211	NFKB1	Closing	NFkB-p65	NFKB1;RELA;RELB;NFKB2;REL	known10.motif	chr1	116628175	116629198	IGSF3	-1.01544	1.28393e-06	intron (NM_001007237, intron 2 of 10)	39046	gene_body	-2.00627	0.0266534	2.00627	concordant_down	4	-1.24321	1.12356e-09	yes	gene_down	TF_down	coherent_activation_loss	active_enhancer	0	1	1	1	1	1	0	0	2	2	2	10	yes	2	EH38D2215459	EH38E1379764	dELS	dELS	EH38E1379764;EH38E2833486
peak_0004211	NFKB1	Closing	NFkB-p50,p52	NFKB1;NFKB2	known13.motif	chr1	116628175	116629198	IGSF3	-1.01544	1.28393e-06	intron (NM_001007237, intron 2 of 10)	39046	gene_body	-2.00627	0.0266534	2.00627	concordant_down	4	-1.24321	1.12356e-09	yes	gene_down	TF_down	coherent_activation_loss	active_enhancer	0	1	1	1	1	1	0	0	2	2	2	10	yes	2	EH38D2215459	EH38E1379764	dELS	dELS	EH38E1379764;EH38E2833486
peak_0004213	ATF3	Closing	Atf3	ATF3	known9.motif	chr1	116637490	116638000	IGSF3	-1.83368	2.06798e-08	intron (NM_001007237, intron 2 of 10)	29988	gene_body	-2.00627	0.0266534	2.00627	concordant_down	4	-3.92028	0.000169874	yes	gene_down	TF_down	coherent_activation_loss	active_enhancer	0	1	1	1	1	1	0	0	2	2	2	10	yes	2	EH38D2215471	EH38E1379776	dELS	dELS	EH38E1379776;EH38E2833493
peak_0004213	FOSL1	Closing	Fra1	FOSL1	known4.motif	chr1	116637490	116638000	IGSF3	-1.83368	2.06798e-08	intron (NM_001007237, intron 2 of 10)	29988	gene_body	-2.00627	0.0266534	2.00627	concordant_down	4	-2.84522	0.0038438	yes	gene_down	TF_down	coherent_activation_loss	active_enhancer	0	1	1	1	1	1	0	0	2	2	2	10	yes	2	EH38D2215471	EH38E1379776	dELS	dELS	EH38E1379776;EH38E2833493
peak_0004213	FOSL2	Closing	Fra2	FOSL2	known11.motif	chr1	116637490	116638000	IGSF3	-1.83368	2.06798e-08	intron (NM_001007237, intron 2 of 10)	29988	gene_body	-2.00627	0.0266534	2.00627	concordant_down	4	-2.94385	0.00157751	yes	gene_down	TF_down	coherent_activation_loss	active_enhancer	0	1	1	1	1	1	0	0	2	2	2	10	yes	2	EH38D2215471	EH38E1379776	dELS	dELS	EH38E1379776;EH38E2833493
peak_0064195	EGR2	Closing	Egr2	EGR2	known16.motif	chr6	506350	507097	IRF4	-1.90476	2.53248e-05	intron (NM_018303, intron 23 of 27)	114972	gene_body	-1.96215	1.03297e-08	1.96215	concordant_down	4	-5.0555	5.55296e-22	yes	gene_down	TF_down	coherent_activation_loss	active_enhancer	0	1	0	1	1	0	0	0	2	2	2	10	yes	2	EH38D5722041	EH38E3685122	dELS	dELS	EH38E3685122;EH38E4392050
peak_0064195	NFATC1	Closing	NFAT	NFATC1;NFATC2;NFATC3;NFATC4	known2.motif	chr6	506350	507097	IRF4	-1.90476	2.53248e-05	intron (NM_018303, intron 23 of 27)	114972	gene_body	-1.96215	1.03297e-08	1.96215	concordant_down	4	-0.764829	0.0475296	yes	gene_down	TF_down	coherent_activation_loss	active_enhancer	0	1	0	1	1	0	0	0	2	2	2	10	yes	2	EH38D5722041	EH38E3685122	dELS	dELS	EH38E3685122;EH38E4392050
peak_0064195	NFKB1	Closing	NFkB-p65	NFKB1;RELA;RELB;NFKB2;REL	known10.motif	chr6	506350	507097	IRF4	-1.90476	2.53248e-05	intron (NM_018303, intron 23 of 27)	114972	gene_body	-1.96215	1.03297e-08	1.96215	concordant_down	4	-1.24321	1.12356e-09	yes	gene_down	TF_down	coherent_activation_loss	active_enhancer	0	1	0	1	1	0	0	0	2	2	2	10	yes	2	EH38D5722041	EH38E3685122	dELS	dELS	EH38E3685122;EH38E4392050
peak_0021141	NFKB1	Closing	NFkB-p65	NFKB1;RELA;RELB;NFKB2;REL	known10.motif	chr13	46165524	46165897	LCP1	-1.11606	2.90915e-05	intron (NM_002298, intron 1 of 15)	16466	gene_body	-1.27599	0.00396583	1.27599	concordant_down	4	-1.24321	1.12356e-09	yes	gene_down	TF_down	coherent_activation_loss	active_enhancer	0	1	0	1	1	0	0	0	2	2	2	10	yes	1	EH38D2650386	EH38E1673903	dELS	dELS	EH38E1673903
peak_0021141	NFKB1	Closing	NFkB-p50,p52	NFKB1;NFKB2	known13.motif	chr13	46165524	46165897	LCP1	-1.11606	2.90915e-05	intron (NM_002298, intron 1 of 15)	16466	gene_body	-1.27599	0.00396583	1.27599	concordant_down	4	-1.24321	1.12356e-09	yes	gene_down	TF_down	coherent_activation_loss	active_enhancer	0	1	0	1	1	0	0	0	2	2	2	10	yes	1	EH38D2650386	EH38E1673903	dELS	dELS	EH38E1673903
peak_0021143	NFATC1	Closing	NFAT	NFATC1;NFATC2;NFATC3;NFATC4	known2.motif	chr13	46173687	46174038	LCP1	-1.55717	2.22578e-08	intron (NM_002298, intron 1 of 15)	8314	gene_body	-1.27599	0.00396583	1.27599	concordant_down	4	-0.764829	0.0475296	yes	gene_down	TF_down	coherent_activation_loss	active_enhancer	0	1	1	1	1	0	0	1	2	2	2	10	yes	1	EH38D2650404	EH38E1673920	dELS	dELS	EH38E1673920
peak_0074306	ATF3	Closing	Atf3	ATF3	known9.motif	chr8	29750716	29751196	LINC02099	-1.25172	0.000100963	non-coding (NR_125816, exon 3 of 3)	2647	gene_body	-2.75993	0.00958422	2.75993	concordant_down	4	-3.92028	0.000169874	yes	gene_down	TF_down	coherent_activation_loss	active_enhancer	0	1	1	1	1	0	0	0	2	2	2	10	yes	2	EH38D5938589	EH38E3826325	dELS	dELS	EH38E3826325;EH38E3826326
peak_0074306	FOSL1	Closing	Fra1	FOSL1	known4.motif	chr8	29750716	29751196	LINC02099	-1.25172	0.000100963	non-coding (NR_125816, exon 3 of 3)	2647	gene_body	-2.75993	0.00958422	2.75993	concordant_down	4	-2.84522	0.0038438	yes	gene_down	TF_down	coherent_activation_loss	active_enhancer	0	1	1	1	1	0	0	0	2	2	2	10	yes	2	EH38D5938589	EH38E3826325	dELS	dELS	EH38E3826325;EH38E3826326
peak_0074306	FOSL2	Closing	Fra2	FOSL2	known11.motif	chr8	29750716	29751196	LINC02099	-1.25172	0.000100963	non-coding (NR_125816, exon 3 of 3)	2647	gene_body	-2.75993	0.00958422	2.75993	concordant_down	4	-2.94385	0.00157751	yes	gene_down	TF_down	coherent_activation_loss	active_enhancer	0	1	1	1	1	0	0	0	2	2	2	10	yes	2	EH38D5938589	EH38E3826325	dELS	dELS	EH38E3826325;EH38E3826326
peak_0074306	FOSL2	Closing	Fosl2	FOSL2	known8.motif	chr8	29750716	29751196	LINC02099	-1.25172	0.000100963	non-coding (NR_125816, exon 3 of 3)	2647	gene_body	-2.75993	0.00958422	2.75993	concordant_down	4	-2.94385	0.00157751	yes	gene_down	TF_down	coherent_activation_loss	active_enhancer	0	1	1	1	1	0	0	0	2	2	2	10	yes	2	EH38D5938589	EH38E3826325	dELS	dELS	EH38E3826325;EH38E3826326
peak_0074306	NFATC1	Closing	NFAT	NFATC1;NFATC2;NFATC3;NFATC4	known2.motif	chr8	29750716	29751196	LINC02099	-1.25172	0.000100963	non-coding (NR_125816, exon 3 of 3)	2647	gene_body	-2.75993	0.00958422	2.75993	concordant_down	4	-0.764829	0.0475296	yes	gene_down	TF_down	coherent_activation_loss	active_enhancer	0	1	1	1	1	0	0	0	2	2	2	10	yes	2	EH38D5938589	EH38E3826325	dELS	dELS	EH38E3826325;EH38E3826326
peak_0032327	NFKB1	Closing	NFkB-p65	NFKB1;RELA;RELB;NFKB2;REL	known10.motif	chr17	48055404	48056318	NFE2L1	-1.41719	9.62542e-08	intron (NM_001330261, intron 2 of 5)	7502	gene_body	-1.64594	7.35948e-07	1.64594	concordant_down	4	-1.24321	1.12356e-09	yes	gene_down	TF_down	coherent_activation_loss	active_enhancer	0	1	1	1	1	0	0	1	2	2	2	10	yes	4	EH38D5018925	EH38E3228125	pELS	pELS	EH38E3228125;EH38E3228126;EH38E3228127;EH38E3228128
peak_0004116	NFATC1	Closing	NFAT:AP1	NFATC1;NFATC2;NFATC3;NFATC4;JUN;FOS;BATF	known1.motif	chr1	113751591	113751871	PHTF1	-1.79283	2.3012e-05	intron (NM_001323051, intron 2 of 12)	7424	gene_body	-1.02238	4.13183e-05	1.02238	concordant_down	4	-0.764829	0.0475296	yes	gene_down	TF_down	coherent_activation_loss	active_enhancer	0	1	0	1	1	0	0	0	2	2	2	10	no	0	.	.	none	.	.
peak_0004116	NFATC1	Closing	NFAT	NFATC1;NFATC2;NFATC3;NFATC4	known2.motif	chr1	113751591	113751871	PHTF1	-1.79283	2.3012e-05	intron (NM_001323051, intron 2 of 12)	7424	gene_body	-1.02238	4.13183e-05	1.02238	concordant_down	4	-0.764829	0.0475296	yes	gene_down	TF_down	coherent_activation_loss	active_enhancer	0	1	0	1	1	0	0	0	2	2	2	10	no	0	.	.	none	.	.
peak_0004116	NFKB1	Closing	NFkB-p65	NFKB1;RELA;RELB;NFKB2;REL	known10.motif	chr1	113751591	113751871	PHTF1	-1.79283	2.3012e-05	intron (NM_001323051, intron 2 of 12)	7424	gene_body	-1.02238	4.13183e-05	1.02238	concordant_down	4	-1.24321	1.12356e-09	yes	gene_down	TF_down	coherent_activation_loss	active_enhancer	0	1	0	1	1	0	0	0	2	2	2	10	no	0	.	.	none	.	.
peak_0004116	TFE3	Closing	TFE3	TFE3	known133.motif	chr1	113751591	113751871	PHTF1	-1.79283	2.3012e-05	intron (NM_001323051, intron 2 of 12)	7424	gene_body	-1.02238	4.13183e-05	1.02238	concordant_down	4	-0.309485	0.00608454	yes	gene_down	TF_down	coherent_activation_loss	active_enhancer	0	1	0	1	1	0	0	0	2	2	2	10	no	0	.	.	none	.	.
peak_0067734	ATF3	Closing	Atf3	ATF3	known9.motif	chr6	134288543	134289064	SGK1	-1.78523	3.08622e-05	intron (NM_001143676, intron 1 of 13)	29254	gene_body	-3.29973	4.71684e-06	3.29973	concordant_down	4	-3.92028	0.000169874	yes	gene_down	TF_down	coherent_activation_loss	active_enhancer	0	1	0	1	1	0	1	0	2	2	2	10	yes	2	EH38D3903176	EH38E2505025	dELS	dELS	EH38E2505025;EH38E2505026
peak_0067734	FOSL1	Closing	Fra1	FOSL1	known4.motif	chr6	134288543	134289064	SGK1	-1.78523	3.08622e-05	intron (NM_001143676, intron 1 of 13)	29254	gene_body	-3.29973	4.71684e-06	3.29973	concordant_down	4	-2.84522	0.0038438	yes	gene_down	TF_down	coherent_activation_loss	active_enhancer	0	1	0	1	1	0	1	0	2	2	2	10	yes	2	EH38D3903176	EH38E2505025	dELS	dELS	EH38E2505025;EH38E2505026
peak_0067734	FOSL2	Closing	Fra2	FOSL2	known11.motif	chr6	134288543	134289064	SGK1	-1.78523	3.08622e-05	intron (NM_001143676, intron 1 of 13)	29254	gene_body	-3.29973	4.71684e-06	3.29973	concordant_down	4	-2.94385	0.00157751	yes	gene_down	TF_down	coherent_activation_loss	active_enhancer	0	1	0	1	1	0	1	0	2	2	2	10	yes	2	EH38D3903176	EH38E2505025	dELS	dELS	EH38E2505025;EH38E2505026
peak_0067734	IRF4	Closing	IRF4	IRF4	known28.motif	chr6	134288543	134289064	SGK1	-1.78523	3.08622e-05	intron (NM_001143676, intron 1 of 13)	29254	gene_body	-3.29973	4.71684e-06	3.29973	concordant_down	4	-1.96215	1.03297e-08	yes	gene_down	TF_down	coherent_activation_loss	active_enhancer	0	1	0	1	1	0	1	0	2	2	2	10	yes	2	EH38D3903176	EH38E2505025	dELS	dELS	EH38E2505025;EH38E2505026
peak_0067734	NFATC1	Closing	NFAT	NFATC1;NFATC2;NFATC3;NFATC4	known2.motif	chr6	134288543	134289064	SGK1	-1.78523	3.08622e-05	intron (NM_001143676, intron 1 of 13)	29254	gene_body	-3.29973	4.71684e-06	3.29973	concordant_down	4	-0.764829	0.0475296	yes	gene_down	TF_down	coherent_activation_loss	active_enhancer	0	1	0	1	1	0	1	0	2	2	2	10	yes	2	EH38D3903176	EH38E2505025	dELS	dELS	EH38E2505025;EH38E2505026
peak_0067734	NFKB1	Closing	NFkB-p65	NFKB1;RELA;RELB;NFKB2;REL	known10.motif	chr6	134288543	134289064	SGK1	-1.78523	3.08622e-05	intron (NM_001143676, intron 1 of 13)	29254	gene_body	-3.29973	4.71684e-06	3.29973	concordant_down	4	-1.24321	1.12356e-09	yes	gene_down	TF_down	coherent_activation_loss	active_enhancer	0	1	0	1	1	0	1	0	2	2	2	10	yes	2	EH38D3903176	EH38E2505025	dELS	dELS	EH38E2505025;EH38E2505026
peak_0067734	RFX5	Closing	Rfx5	RFX5	known108.motif	chr6	134288543	134289064	SGK1	-1.78523	3.08622e-05	intron (NM_001143676, intron 1 of 13)	29254	gene_body	-3.29973	4.71684e-06	3.29973	concordant_down	4	-0.493972	0.000101039	yes	gene_down	TF_down	coherent_activation_loss	active_enhancer	0	1	0	1	1	0	1	0	2	2	2	10	yes	2	EH38D3903176	EH38E2505025	dELS	dELS	EH38E2505025;EH38E2505026
peak_0066127	NFATC1	Closing	NFAT:AP1	NFATC1;NFATC2;NFATC3;NFATC4;JUN;FOS;BATF	known1.motif	chr6	44260241	44260818	SLC35B2	-1.11825	2.44467e-06	exon (NM_004556, exon 4 of 6)	-2640	gene_body	-1.16781	0.00014503	1.16781	concordant_down	4	-0.764829	0.0475296	yes	gene_down	TF_down	coherent_activation_loss	active_enhancer	0	1	1	1	1	0	0	1	2	2	2	10	yes	2	EH38D5756633	EH38E3709923	dELS	dELS	EH38E3709923;EH38E4402519
peak_0066127	NFATC1	Closing	NFAT	NFATC1;NFATC2;NFATC3;NFATC4	known2.motif	chr6	44260241	44260818	SLC35B2	-1.11825	2.44467e-06	exon (NM_004556, exon 4 of 6)	-2640	gene_body	-1.16781	0.00014503	1.16781	concordant_down	4	-0.764829	0.0475296	yes	gene_down	TF_down	coherent_activation_loss	active_enhancer	0	1	1	1	1	0	0	1	2	2	2	10	yes	2	EH38D5756633	EH38E3709923	dELS	dELS	EH38E3709923;EH38E4402519
peak_0030072	ATF3	Closing	Atf3	ATF3	known9.motif	chr16	87895500	87896125	SLC7A5	-1.55948	2.24032e-06	intron (NR_159798, intron 5 of 7)	-26306	gene_body	-2.73247	0.00910627	2.73247	concordant_down	4	-3.92028	0.000169874	yes	gene_down	TF_down	coherent_activation_loss	active_enhancer	0	1	0	1	1	1	0	0	2	2	2	10	yes	2	EH38D2895946	EH38E1836584	dELS	dELS	EH38E1836584;EH38E3198639
peak_0030072	FOSL1	Closing	Fra1	FOSL1	known4.motif	chr16	87895500	87896125	SLC7A5	-1.55948	2.24032e-06	intron (NR_159798, intron 5 of 7)	-26306	gene_body	-2.73247	0.00910627	2.73247	concordant_down	4	-2.84522	0.0038438	yes	gene_down	TF_down	coherent_activation_loss	active_enhancer	0	1	0	1	1	1	0	0	2	2	2	10	yes	2	EH38D2895946	EH38E1836584	dELS	dELS	EH38E1836584;EH38E3198639
peak_0030072	FOSL2	Closing	Fra2	FOSL2	known11.motif	chr16	87895500	87896125	SLC7A5	-1.55948	2.24032e-06	intron (NR_159798, intron 5 of 7)	-26306	gene_body	-2.73247	0.00910627	2.73247	concordant_down	4	-2.94385	0.00157751	yes	gene_down	TF_down	coherent_activation_loss	active_enhancer	0	1	0	1	1	1	0	0	2	2	2	10	yes	2	EH38D2895946	EH38E1836584	dELS	dELS	EH38E1836584;EH38E3198639
peak_0030072	FOSL2	Closing	Fosl2	FOSL2	known8.motif	chr16	87895500	87896125	SLC7A5	-1.55948	2.24032e-06	intron (NR_159798, intron 5 of 7)	-26306	gene_body	-2.73247	0.00910627	2.73247	concordant_down	4	-2.94385	0.00157751	yes	gene_down	TF_down	coherent_activation_loss	active_enhancer	0	1	0	1	1	1	0	0	2	2	2	10	yes	2	EH38D2895946	EH38E1836584	dELS	dELS	EH38E1836584;EH38E3198639
peak_0046480	ATF3	Closing	Atf3	ATF3	known9.motif	chr20	17962754	17962982	SNORD17	-1.01588	8.52104e-06	promoter-TSS (NR_003045)	78	promoter	-0.722844	0.273897	0.722844	concordant_down	4	-3.92028	0.000169874	yes	gene_not_significant	TF_down	coherent_activation_loss	active_promoter	1	0	1	1	1	0	0	0	2	2	2	10	yes	1	EH38D5312977	EH38E3422344	PLS	PLS	EH38E3422344
peak_0046480	FOSL1	Closing	Fra1	FOSL1	known4.motif	chr20	17962754	17962982	SNORD17	-1.01588	8.52104e-06	promoter-TSS (NR_003045)	78	promoter	-0.722844	0.273897	0.722844	concordant_down	4	-2.84522	0.0038438	yes	gene_not_significant	TF_down	coherent_activation_loss	active_promoter	1	0	1	1	1	0	0	0	2	2	2	10	yes	1	EH38D5312977	EH38E3422344	PLS	PLS	EH38E3422344
peak_0046480	FOSL2	Closing	Fra2	FOSL2	known11.motif	chr20	17962754	17962982	SNORD17	-1.01588	8.52104e-06	promoter-TSS (NR_003045)	78	promoter	-0.722844	0.273897	0.722844	concordant_down	4	-2.94385	0.00157751	yes	gene_not_significant	TF_down	coherent_activation_loss	active_promoter	1	0	1	1	1	0	0	0	2	2	2	10	yes	1	EH38D5312977	EH38E3422344	PLS	PLS	EH38E3422344
peak_0046480	NFATC1	Closing	NFAT:AP1	NFATC1;NFATC2;NFATC3;NFATC4;JUN;FOS;BATF	known1.motif	chr20	17962754	17962982	SNORD17	-1.01588	8.52104e-06	promoter-TSS (NR_003045)	78	promoter	-0.722844	0.273897	0.722844	concordant_down	4	-0.764829	0.0475296	yes	gene_not_significant	TF_down	coherent_activation_loss	active_promoter	1	0	1	1	1	0	0	0	2	2	2	10	yes	1	EH38D5312977	EH38E3422344	PLS	PLS	EH38E3422344
peak_0017714	EGR2	Closing	Egr2	EGR2	known16.motif	chr12	54981904	54982097	TESPA1	-1.95196	4.19074e-06	promoter-TSS (NM_001098815)	-70	promoter	-0.999186	5.64404e-06	0.999186	concordant_down	4	-5.0555	5.55296e-22	yes	gene_down	TF_down	coherent_activation_loss	active_promoter	1	0	1	1	1	0	0	1	2	2	2	10	yes	1	EH38D4696825	EH38E3019823	PLS	PLS	EH38E3019823
peak_0017714	NFATC1	Closing	NFAT	NFATC1;NFATC2;NFATC3;NFATC4	known2.motif	chr12	54981904	54982097	TESPA1	-1.95196	4.19074e-06	promoter-TSS (NM_001098815)	-70	promoter	-0.999186	5.64404e-06	0.999186	concordant_down	4	-0.764829	0.0475296	yes	gene_down	TF_down	coherent_activation_loss	active_promoter	1	0	1	1	1	0	0	1	2	2	2	10	yes	1	EH38D4696825	EH38E3019823	PLS	PLS	EH38E3019823
peak_0017714	NFKB1	Closing	NFkB-p65	NFKB1;RELA;RELB;NFKB2;REL	known10.motif	chr12	54981904	54982097	TESPA1	-1.95196	4.19074e-06	promoter-TSS (NM_001098815)	-70	promoter	-0.999186	5.64404e-06	0.999186	concordant_down	4	-1.24321	1.12356e-09	yes	gene_down	TF_down	coherent_activation_loss	active_promoter	1	0	1	1	1	0	0	1	2	2	2	10	yes	1	EH38D4696825	EH38E3019823	PLS	PLS	EH38E3019823
peak_0046191	PTF1A	Opening	Ptf1a	PTF1A	known19.motif	chr20	3799029	3800058	CDC25B	1.04129	3.02948e-06	promoter-TSS (NM_001287524)	-518	promoter	1.36346	9.53513e-05	1.36346	concordant_up	5	NA	NA	yes	gene_up	tf_rna_missing	coherent_activation_gain	active_promoter	1	0	1	1	1	0	0	1	2	2	0	9	yes	3	EH38D3271888	EH38E2093747	dELS	dELS	EH38E2093747;EH38E2093749;EH38E3417262
peak_0046191	TWIST2	Opening	Twist2	TWIST2	known18.motif	chr20	3799029	3800058	CDC25B	1.04129	3.02948e-06	promoter-TSS (NM_001287524)	-518	promoter	1.36346	9.53513e-05	1.36346	concordant_up	5	NA	NA	yes	gene_up	tf_rna_missing	coherent_activation_gain	active_promoter	1	0	1	1	1	0	0	1	2	2	0	9	yes	3	EH38D3271888	EH38E2093747	dELS	dELS	EH38E2093747;EH38E2093749;EH38E3417262
peak_0046643	ASCL2	Closing	Ascl2	ASCL2	known104.motif	chr20	24948838	24949496	CST7	-1.16124	0.000553991	promoter-TSS (NM_003650)	-102	promoter	-4.06678	0.0483539	4.06678	concordant_down	5	0.302007	1	yes	gene_down	TF_not_significant	coherent_activation_loss	bivalent_promoter	1	0	1	1	1	1	1	1	1	2	1	9	yes	3	EH38D5317793	EH38E3425468	pELS	pELS;PLS	EH38E3425468;EH38E3425470;EH38E4258598
peak_0046643	ATF4	Closing	Atf4	ATF4	known22.motif	chr20	24948838	24949496	CST7	-1.16124	0.000553991	promoter-TSS (NM_003650)	-102	promoter	-4.06678	0.0483539	4.06678	concordant_down	5	-0.409799	0.158993	yes	gene_down	TF_not_significant	coherent_activation_loss	bivalent_promoter	1	0	1	1	1	1	1	1	1	2	1	9	yes	3	EH38D5317793	EH38E3425468	pELS	pELS;PLS	EH38E3425468;EH38E3425470;EH38E4258598
peak_0046643	BACH1	Closing	Bach1	BACH1	known53.motif	chr20	24948838	24949496	CST7	-1.16124	0.000553991	promoter-TSS (NM_003650)	-102	promoter	-4.06678	0.0483539	4.06678	concordant_down	5	-0.234	0.752039	yes	gene_down	TF_not_significant	coherent_activation_loss	bivalent_promoter	1	0	1	1	1	1	1	1	1	2	1	9	yes	3	EH38D5317793	EH38E3425468	pELS	pELS;PLS	EH38E3425468;EH38E3425470;EH38E4258598
peak_0046643	BACH2	Closing	Bach2	BACH2	known31.motif	chr20	24948838	24949496	CST7	-1.16124	0.000553991	promoter-TSS (NM_003650)	-102	promoter	-4.06678	0.0483539	4.06678	concordant_down	5	0.0555713	1	yes	gene_down	TF_not_significant	coherent_activation_loss	bivalent_promoter	1	0	1	1	1	1	1	1	1	2	1	9	yes	3	EH38D5317793	EH38E3425468	pELS	pELS;PLS	EH38E3425468;EH38E3425470;EH38E4258598
peak_0046643	BATF	Closing	BATF	BATF	known3.motif	chr20	24948838	24949496	CST7	-1.16124	0.000553991	promoter-TSS (NM_003650)	-102	promoter	-4.06678	0.0483539	4.06678	concordant_down	5	-0.596918	0.292535	yes	gene_down	TF_not_significant	coherent_activation_loss	bivalent_promoter	1	0	1	1	1	1	1	1	1	2	1	9	yes	3	EH38D5317793	EH38E3425468	pELS	pELS;PLS	EH38E3425468;EH38E3425470;EH38E4258598
peak_0046643	EHF	Closing	EHF	EHF	known75.motif	chr20	24948838	24949496	CST7	-1.16124	0.000553991	promoter-TSS (NM_003650)	-102	promoter	-4.06678	0.0483539	4.06678	concordant_down	5	1.70243	0.699136	yes	gene_down	TF_not_significant	coherent_activation_loss	bivalent_promoter	1	0	1	1	1	1	1	1	1	2	1	9	yes	3	EH38D5317793	EH38E3425468	pELS	pELS;PLS	EH38E3425468;EH38E3425470;EH38E4258598
peak_0046643	ERG	Closing	ERG	ERG	known81.motif	chr20	24948838	24949496	CST7	-1.16124	0.000553991	promoter-TSS (NM_003650)	-102	promoter	-4.06678	0.0483539	4.06678	concordant_down	5	0.605698	1	yes	gene_down	TF_not_significant	coherent_activation_loss	bivalent_promoter	1	0	1	1	1	1	1	1	1	2	1	9	yes	3	EH38D5317793	EH38E3425468	pELS	pELS;PLS	EH38E3425468;EH38E3425470;EH38E4258598
peak_0046643	ETS1	Closing	ETS1	ETS1	known47.motif	chr20	24948838	24949496	CST7	-1.16124	0.000553991	promoter-TSS (NM_003650)	-102	promoter	-4.06678	0.0483539	4.06678	concordant_down	5	0.148395	0.873217	yes	gene_down	TF_not_significant	coherent_activation_loss	bivalent_promoter	1	0	1	1	1	1	1	1	1	2	1	9	yes	3	EH38D5317793	EH38E3425468	pELS	pELS;PLS	EH38E3425468;EH38E3425470;EH38E4258598
peak_0046643	FLI1	Closing	Fli1	FLI1	known59.motif	chr20	24948838	24949496	CST7	-1.16124	0.000553991	promoter-TSS (NM_003650)	-102	promoter	-4.06678	0.0483539	4.06678	concordant_down	5	0.453465	0.170815	yes	gene_down	TF_not_significant	coherent_activation_loss	bivalent_promoter	1	0	1	1	1	1	1	1	1	2	1	9	yes	3	EH38D5317793	EH38E3425468	pELS	pELS;PLS	EH38E3425468;EH38E3425470;EH38E4258598
peak_0046643	FOS	Closing	Fos	FOS	known5.motif	chr20	24948838	24949496	CST7	-1.16124	0.000553991	promoter-TSS (NM_003650)	-102	promoter	-4.06678	0.0483539	4.06678	concordant_down	5	0.128665	1	yes	gene_down	TF_not_significant	coherent_activation_loss	bivalent_promoter	1	0	1	1	1	1	1	1	1	2	1	9	yes	3	EH38D5317793	EH38E3425468	pELS	pELS;PLS	EH38E3425468;EH38E3425470;EH38E4258598
peak_0046643	GFI1B	Closing	Gfi1b	GFI1B	known130.motif	chr20	24948838	24949496	CST7	-1.16124	0.000553991	promoter-TSS (NM_003650)	-102	promoter	-4.06678	0.0483539	4.06678	concordant_down	5	0.0233349	1	yes	gene_down	TF_not_significant	coherent_activation_loss	bivalent_promoter	1	0	1	1	1	1	1	1	1	2	1	9	yes	3	EH38D5317793	EH38E3425468	pELS	pELS;PLS	EH38E3425468;EH38E3425470;EH38E4258598
peak_0046643	HLF	Closing	HLF	HLF	known39.motif	chr20	24948838	24949496	CST7	-1.16124	0.000553991	promoter-TSS (NM_003650)	-102	promoter	-4.06678	0.0483539	4.06678	concordant_down	5	0.261211	1	yes	gene_down	TF_not_significant	coherent_activation_loss	bivalent_promoter	1	0	1	1	1	1	1	1	1	2	1	9	yes	3	EH38D5317793	EH38E3425468	pELS	pELS;PLS	EH38E3425468;EH38E3425470;EH38E4258598
peak_0046643	JUN	Closing	AP-1	JUN;FOS;JUNB;JUND;FOSL1;FOSL2;ATF3;BATF	known7.motif	chr20	24948838	24949496	CST7	-1.16124	0.000553991	promoter-TSS (NM_003650)	-102	promoter	-4.06678	0.0483539	4.06678	concordant_down	5	0.329662	1	yes	gene_down	TF_not_significant	coherent_activation_loss	bivalent_promoter	1	0	1	1	1	1	1	1	1	2	1	9	yes	3	EH38D5317793	EH38E3425468	pELS	pELS;PLS	EH38E3425468;EH38E3425470;EH38E4258598
peak_0046643	JUNB	Closing	JunB	JUNB	known6.motif	chr20	24948838	24949496	CST7	-1.16124	0.000553991	promoter-TSS (NM_003650)	-102	promoter	-4.06678	0.0483539	4.06678	concordant_down	5	0.338285	1	yes	gene_down	TF_not_significant	coherent_activation_loss	bivalent_promoter	1	0	1	1	1	1	1	1	1	2	1	9	yes	3	EH38D5317793	EH38E3425468	pELS	pELS;PLS	EH38E3425468;EH38E3425470;EH38E4258598
peak_0046643	KLF14	Closing	KLF14	KLF14	known55.motif	chr20	24948838	24949496	CST7	-1.16124	0.000553991	promoter-TSS (NM_003650)	-102	promoter	-4.06678	0.0483539	4.06678	concordant_down	5	0.424493	1	yes	gene_down	TF_not_significant	coherent_activation_loss	bivalent_promoter	1	0	1	1	1	1	1	1	1	2	1	9	yes	3	EH38D5317793	EH38E3425468	pELS	pELS;PLS	EH38E3425468;EH38E3425470;EH38E4258598
peak_0046643	KLF5	Closing	KLF5	KLF5	known134.motif	chr20	24948838	24949496	CST7	-1.16124	0.000553991	promoter-TSS (NM_003650)	-102	promoter	-4.06678	0.0483539	4.06678	concordant_down	5	0.394372	1	yes	gene_down	TF_not_significant	coherent_activation_loss	bivalent_promoter	1	0	1	1	1	1	1	1	1	2	1	9	yes	3	EH38D5317793	EH38E3425468	pELS	pELS;PLS	EH38E3425468;EH38E3425470;EH38E4258598
peak_0046643	MAFA	Closing	MafA	MAFA	known123.motif	chr20	24948838	24949496	CST7	-1.16124	0.000553991	promoter-TSS (NM_003650)	-102	promoter	-4.06678	0.0483539	4.06678	concordant_down	5	2.12167	0.391851	yes	gene_down	TF_not_significant	coherent_activation_loss	bivalent_promoter	1	0	1	1	1	1	1	1	1	2	1	9	yes	3	EH38D5317793	EH38E3425468	pELS	pELS;PLS	EH38E3425468;EH38E3425470;EH38E4258598
peak_0046643	MAZ	Closing	Maz	MAZ	known64.motif	chr20	24948838	24949496	CST7	-1.16124	0.000553991	promoter-TSS (NM_003650)	-102	promoter	-4.06678	0.0483539	4.06678	concordant_down	5	-0.0810828	1	yes	gene_down	TF_not_significant	coherent_activation_loss	bivalent_promoter	1	0	1	1	1	1	1	1	1	2	1	9	yes	3	EH38D5317793	EH38E3425468	pELS	pELS;PLS	EH38E3425468;EH38E3425470;EH38E4258598
peak_0046643	MNT	Closing	MNT	MNT	known100.motif	chr20	24948838	24949496	CST7	-1.16124	0.000553991	promoter-TSS (NM_003650)	-102	promoter	-4.06678	0.0483539	4.06678	concordant_down	5	-0.067775	1	yes	gene_down	TF_not_significant	coherent_activation_loss	bivalent_promoter	1	0	1	1	1	1	1	1	1	2	1	9	yes	3	EH38D5317793	EH38E3425468	pELS	pELS;PLS	EH38E3425468;EH38E3425470;EH38E4258598
peak_0046643	MYB	Closing	MYB	MYB	known106.motif	chr20	24948838	24949496	CST7	-1.16124	0.000553991	promoter-TSS (NM_003650)	-102	promoter	-4.06678	0.0483539	4.06678	concordant_down	5	-0.131766	1	yes	gene_down	TF_not_significant	coherent_activation_loss	bivalent_promoter	1	0	1	1	1	1	1	1	1	2	1	9	yes	3	EH38D5317793	EH38E3425468	pELS	pELS;PLS	EH38E3425468;EH38E3425470;EH38E4258598
peak_0046643	MYNN	Closing	MYNN	MYNN	known124.motif	chr20	24948838	24949496	CST7	-1.16124	0.000553991	promoter-TSS (NM_003650)	-102	promoter	-4.06678	0.0483539	4.06678	concordant_down	5	-0.150089	0.529844	yes	gene_down	TF_not_significant	coherent_activation_loss	bivalent_promoter	1	0	1	1	1	1	1	1	1	2	1	9	yes	3	EH38D5317793	EH38E3425468	pELS	pELS;PLS	EH38E3425468;EH38E3425470;EH38E4258598
peak_0046643	PRDM10	Closing	PRDM10	PRDM10	known117.motif	chr20	24948838	24949496	CST7	-1.16124	0.000553991	promoter-TSS (NM_003650)	-102	promoter	-4.06678	0.0483539	4.06678	concordant_down	5	0.292319	0.384812	yes	gene_down	TF_not_significant	coherent_activation_loss	bivalent_promoter	1	0	1	1	1	1	1	1	1	2	1	9	yes	3	EH38D5317793	EH38E3425468	pELS	pELS;PLS	EH38E3425468;EH38E3425470;EH38E4258598
peak_0046643	RFX6	Closing	Rfx6	RFX6	known127.motif	chr20	24948838	24949496	CST7	-1.16124	0.000553991	promoter-TSS (NM_003650)	-102	promoter	-4.06678	0.0483539	4.06678	concordant_down	5	0.245026	1	yes	gene_down	TF_not_significant	coherent_activation_loss	bivalent_promoter	1	0	1	1	1	1	1	1	1	2	1	9	yes	3	EH38D5317793	EH38E3425468	pELS	pELS;PLS	EH38E3425468;EH38E3425470;EH38E4258598
peak_0046643	RUNX1	Closing	RUNX1	RUNX1	known27.motif	chr20	24948838	24949496	CST7	-1.16124	0.000553991	promoter-TSS (NM_003650)	-102	promoter	-4.06678	0.0483539	4.06678	concordant_down	5	-0.107419	1	yes	gene_down	TF_not_significant	coherent_activation_loss	bivalent_promoter	1	0	1	1	1	1	1	1	1	2	1	9	yes	3	EH38D5317793	EH38E3425468	pELS	pELS;PLS	EH38E3425468;EH38E3425470;EH38E4258598
peak_0046643	STAT4	Closing	STAT4	STAT4	known111.motif	chr20	24948838	24949496	CST7	-1.16124	0.000553991	promoter-TSS (NM_003650)	-102	promoter	-4.06678	0.0483539	4.06678	concordant_down	5	-1.35402	1	yes	gene_down	TF_not_significant	coherent_activation_loss	bivalent_promoter	1	0	1	1	1	1	1	1	1	2	1	9	yes	3	EH38D5317793	EH38E3425468	pELS	pELS;PLS	EH38E3425468;EH38E3425470;EH38E4258598
peak_0046643	ZNF189	Closing	ZNF189	ZNF189	known112.motif	chr20	24948838	24949496	CST7	-1.16124	0.000553991	promoter-TSS (NM_003650)	-102	promoter	-4.06678	0.0483539	4.06678	concordant_down	5	-0.0296017	1	yes	gene_down	TF_not_significant	coherent_activation_loss	bivalent_promoter	1	0	1	1	1	1	1	1	1	2	1	9	yes	3	EH38D5317793	EH38E3425468	pELS	pELS;PLS	EH38E3425468;EH38E3425470;EH38E4258598
peak_0026689	KLF14	Closing	KLF14	KLF14	known55.motif	chr15	79091403	79091857	RASGRF1	-1.22727	0.000441191	promoter-TSS (NM_002891)	-850	promoter	-1.13292	0.00566006	1.13292	concordant_down	5	0.424493	1	yes	gene_down	TF_not_significant	coherent_activation_loss	bivalent_promoter	1	0	1	1	1	1	0	0	1	2	1	9	yes	2	EH38D4897296	EH38E3149157	pELS	pELS	EH38E3149157;EH38E3149158
peak_0026689	KLF5	Closing	KLF5	KLF5	known134.motif	chr15	79091403	79091857	RASGRF1	-1.22727	0.000441191	promoter-TSS (NM_002891)	-850	promoter	-1.13292	0.00566006	1.13292	concordant_down	5	0.394372	1	yes	gene_down	TF_not_significant	coherent_activation_loss	bivalent_promoter	1	0	1	1	1	1	0	0	1	2	1	9	yes	2	EH38D4897296	EH38E3149157	pELS	pELS	EH38E3149157;EH38E3149158
peak_0026689	MAZ	Closing	Maz	MAZ	known64.motif	chr15	79091403	79091857	RASGRF1	-1.22727	0.000441191	promoter-TSS (NM_002891)	-850	promoter	-1.13292	0.00566006	1.13292	concordant_down	5	-0.0810828	1	yes	gene_down	TF_not_significant	coherent_activation_loss	bivalent_promoter	1	0	1	1	1	1	0	0	1	2	1	9	yes	2	EH38D4897296	EH38E3149157	pELS	pELS	EH38E3149157;EH38E3149158
peak_0026689	MEF2A	Closing	Mef2a	MEF2A	known65.motif	chr15	79091403	79091857	RASGRF1	-1.22727	0.000441191	promoter-TSS (NM_002891)	-850	promoter	-1.13292	0.00566006	1.13292	concordant_down	5	-0.296281	0.0990156	yes	gene_down	TF_not_significant	coherent_activation_loss	bivalent_promoter	1	0	1	1	1	1	0	0	1	2	1	9	yes	2	EH38D4897296	EH38E3149157	pELS	pELS	EH38E3149157;EH38E3149158
peak_0026689	MEF2B	Closing	Mef2b	MEF2B	known63.motif	chr15	79091403	79091857	RASGRF1	-1.22727	0.000441191	promoter-TSS (NM_002891)	-850	promoter	-1.13292	0.00566006	1.13292	concordant_down	5	-0.867043	0.635595	yes	gene_down	TF_not_significant	coherent_activation_loss	bivalent_promoter	1	0	1	1	1	1	0	0	1	2	1	9	yes	2	EH38D4897296	EH38E3149157	pELS	pELS	EH38E3149157;EH38E3149158
peak_0026689	MEF2C	Closing	Mef2c	MEF2C	known52.motif	chr15	79091403	79091857	RASGRF1	-1.22727	0.000441191	promoter-TSS (NM_002891)	-850	promoter	-1.13292	0.00566006	1.13292	concordant_down	5	-0.251466	1	yes	gene_down	TF_not_significant	coherent_activation_loss	bivalent_promoter	1	0	1	1	1	1	0	0	1	2	1	9	yes	2	EH38D4897296	EH38E3149157	pELS	pELS	EH38E3149157;EH38E3149158
peak_0026689	MEF2D	Closing	Mef2d	MEF2D	known46.motif	chr15	79091403	79091857	RASGRF1	-1.22727	0.000441191	promoter-TSS (NM_002891)	-850	promoter	-1.13292	0.00566006	1.13292	concordant_down	5	-0.0668923	1	yes	gene_down	TF_not_significant	coherent_activation_loss	bivalent_promoter	1	0	1	1	1	1	0	0	1	2	1	9	yes	2	EH38D4897296	EH38E3149157	pELS	pELS	EH38E3149157;EH38E3149158
peak_0048806	AP4	Closing	Ap4	AP4	known85.motif	chr21	34526436	34527252	RCAN1	-1.3473	5.00017e-08	promoter-TSS (NM_203418)	-22	promoter	-3.50625	1.67652e-13	3.50625	concordant_down	5	NA	NA	yes	gene_down	tf_rna_missing	coherent_activation_loss	active_promoter	1	0	1	1	1	0	0	0	2	2	0	9	yes	2	EH38D3337389	EH38E2138804	pELS	pELS;PLS	EH38E2138804;EH38E3456316
peak_0048806	BAPX1	Closing	Bapx1	BAPX1	known95.motif	chr21	34526436	34527252	RCAN1	-1.3473	5.00017e-08	promoter-TSS (NM_203418)	-22	promoter	-3.50625	1.67652e-13	3.50625	concordant_down	5	NA	NA	yes	gene_down	tf_rna_missing	coherent_activation_loss	active_promoter	1	0	1	1	1	0	0	0	2	2	0	9	yes	2	EH38D3337389	EH38E2138804	pELS	pELS;PLS	EH38E2138804;EH38E3456316
peak_0048806	BZIP:IRF	Closing	bZIP:IRF	BZIP:IRF	known26.motif	chr21	34526436	34527252	RCAN1	-1.3473	5.00017e-08	promoter-TSS (NM_203418)	-22	promoter	-3.50625	1.67652e-13	3.50625	concordant_down	5	NA	NA	yes	gene_down	tf_rna_missing	coherent_activation_loss	active_promoter	1	0	1	1	1	0	0	0	2	2	0	9	yes	2	EH38D3337389	EH38E2138804	pELS	pELS;PLS	EH38E2138804;EH38E3456316
peak_0048806	C-JUN-CRE	Closing	c-Jun-CRE	C-JUN-CRE	known77.motif	chr21	34526436	34527252	RCAN1	-1.3473	5.00017e-08	promoter-TSS (NM_203418)	-22	promoter	-3.50625	1.67652e-13	3.50625	concordant_down	5	NA	NA	yes	gene_down	tf_rna_missing	coherent_activation_loss	active_promoter	1	0	1	1	1	0	0	0	2	2	0	9	yes	2	EH38D3337389	EH38E2138804	pELS	pELS;PLS	EH38E2138804;EH38E3456316
peak_0048806	CEBP:AP1	Closing	CEBP:AP1	CEBP:AP1	known24.motif	chr21	34526436	34527252	RCAN1	-1.3473	5.00017e-08	promoter-TSS (NM_203418)	-22	promoter	-3.50625	1.67652e-13	3.50625	concordant_down	5	NA	NA	yes	gene_down	tf_rna_missing	coherent_activation_loss	active_promoter	1	0	1	1	1	0	0	0	2	2	0	9	yes	2	EH38D3337389	EH38E2138804	pELS	pELS;PLS	EH38E2138804;EH38E3456316
peak_0048806	CEBP:CEBP	Closing	CEBP:CEBP	CEBP:CEBP	known60.motif	chr21	34526436	34527252	RCAN1	-1.3473	5.00017e-08	promoter-TSS (NM_203418)	-22	promoter	-3.50625	1.67652e-13	3.50625	concordant_down	5	NA	NA	yes	gene_down	tf_rna_missing	coherent_activation_loss	active_promoter	1	0	1	1	1	0	0	0	2	2	0	9	yes	2	EH38D3337389	EH38E2138804	pELS	pELS;PLS	EH38E2138804;EH38E3456316
peak_0048806	CHR	Closing	CHR	CHR	known70.motif	chr21	34526436	34527252	RCAN1	-1.3473	5.00017e-08	promoter-TSS (NM_203418)	-22	promoter	-3.50625	1.67652e-13	3.50625	concordant_down	5	NA	NA	yes	gene_down	tf_rna_missing	coherent_activation_loss	active_promoter	1	0	1	1	1	0	0	0	2	2	0	9	yes	2	EH38D3337389	EH38E2138804	pELS	pELS;PLS	EH38E2138804;EH38E3456316
peak_0048806	ETS1-DISTAL	Closing	Ets1-distal	ETS1-DISTAL	known89.motif	chr21	34526436	34527252	RCAN1	-1.3473	5.00017e-08	promoter-TSS (NM_203418)	-22	promoter	-3.50625	1.67652e-13	3.50625	concordant_down	5	NA	NA	yes	gene_down	tf_rna_missing	coherent_activation_loss	active_promoter	1	0	1	1	1	0	0	0	2	2	0	9	yes	2	EH38D3337389	EH38E2138804	pELS	pELS;PLS	EH38E2138804;EH38E3456316
peak_0048806	ISL1	Closing	Isl1	ISL1	known91.motif	chr21	34526436	34527252	RCAN1	-1.3473	5.00017e-08	promoter-TSS (NM_203418)	-22	promoter	-3.50625	1.67652e-13	3.50625	concordant_down	5	NA	NA	yes	gene_down	tf_rna_missing	coherent_activation_loss	active_promoter	1	0	1	1	1	0	0	0	2	2	0	9	yes	2	EH38D3337389	EH38E2138804	pELS	pELS;PLS	EH38E2138804;EH38E3456316
peak_0048806	ISRE	Closing	ISRE	ISRE	known114.motif	chr21	34526436	34527252	RCAN1	-1.3473	5.00017e-08	promoter-TSS (NM_203418)	-22	promoter	-3.50625	1.67652e-13	3.50625	concordant_down	5	NA	NA	yes	gene_down	tf_rna_missing	coherent_activation_loss	active_promoter	1	0	1	1	1	0	0	0	2	2	0	9	yes	2	EH38D3337389	EH38E2138804	pELS	pELS;PLS	EH38E2138804;EH38E3456316
peak_0048806	LHX9	Closing	LHX9	LHX9	known131.motif	chr21	34526436	34527252	RCAN1	-1.3473	5.00017e-08	promoter-TSS (NM_203418)	-22	promoter	-3.50625	1.67652e-13	3.50625	concordant_down	5	NA	NA	yes	gene_down	tf_rna_missing	coherent_activation_loss	active_promoter	1	0	1	1	1	0	0	0	2	2	0	9	yes	2	EH38D3337389	EH38E2138804	pELS	pELS;PLS	EH38E2138804;EH38E3456316
peak_0048806	MYOD	Closing	MyoD	MYOD	known118.motif	chr21	34526436	34527252	RCAN1	-1.3473	5.00017e-08	promoter-TSS (NM_203418)	-22	promoter	-3.50625	1.67652e-13	3.50625	concordant_down	5	NA	NA	yes	gene_down	tf_rna_missing	coherent_activation_loss	active_promoter	1	0	1	1	1	0	0	0	2	2	0	9	yes	2	EH38D3337389	EH38E2138804	pELS	pELS;PLS	EH38E2138804;EH38E3456316
peak_0048806	MYOG	Closing	MyoG	MYOG	known103.motif	chr21	34526436	34527252	RCAN1	-1.3473	5.00017e-08	promoter-TSS (NM_203418)	-22	promoter	-3.50625	1.67652e-13	3.50625	concordant_down	5	NA	NA	yes	gene_down	tf_rna_missing	coherent_activation_loss	active_promoter	1	0	1	1	1	0	0	0	2	2	0	9	yes	2	EH38D3337389	EH38E2138804	pELS	pELS;PLS	EH38E2138804;EH38E3456316
peak_0048806	OCT:OCT-SHORT	Closing	OCT:OCT-short	OCT:OCT-SHORT	known125.motif	chr21	34526436	34527252	RCAN1	-1.3473	5.00017e-08	promoter-TSS (NM_203418)	-22	promoter	-3.50625	1.67652e-13	3.50625	concordant_down	5	NA	NA	yes	gene_down	tf_rna_missing	coherent_activation_loss	active_promoter	1	0	1	1	1	0	0	0	2	2	0	9	yes	2	EH38D3337389	EH38E2138804	pELS	pELS;PLS	EH38E2138804;EH38E3456316
peak_0048806	OCT6	Closing	Oct6	OCT6	known30.motif	chr21	34526436	34527252	RCAN1	-1.3473	5.00017e-08	promoter-TSS (NM_203418)	-22	promoter	-3.50625	1.67652e-13	3.50625	concordant_down	5	NA	NA	yes	gene_down	tf_rna_missing	coherent_activation_loss	active_promoter	1	0	1	1	1	0	0	0	2	2	0	9	yes	2	EH38D3337389	EH38E2138804	pELS	pELS;PLS	EH38E2138804;EH38E3456316
peak_0048806	PU.1-IRF	Closing	PU.1-IRF	PU.1-IRF	known29.motif	chr21	34526436	34527252	RCAN1	-1.3473	5.00017e-08	promoter-TSS (NM_203418)	-22	promoter	-3.50625	1.67652e-13	3.50625	concordant_down	5	NA	NA	yes	gene_down	tf_rna_missing	coherent_activation_loss	active_promoter	1	0	1	1	1	0	0	0	2	2	0	9	yes	2	EH38D3337389	EH38E2138804	pELS	pELS;PLS	EH38E2138804;EH38E3456316
peak_0048806	PU.1:IRF8	Closing	PU.1:IRF8	PU.1:IRF8	known37.motif	chr21	34526436	34527252	RCAN1	-1.3473	5.00017e-08	promoter-TSS (NM_203418)	-22	promoter	-3.50625	1.67652e-13	3.50625	concordant_down	5	NA	NA	yes	gene_down	tf_rna_missing	coherent_activation_loss	active_promoter	1	0	1	1	1	0	0	0	2	2	0	9	yes	2	EH38D3337389	EH38E2138804	pELS	pELS;PLS	EH38E2138804;EH38E3456316
peak_0048806	TCF21	Closing	Tcf21	TCF21	known86.motif	chr21	34526436	34527252	RCAN1	-1.3473	5.00017e-08	promoter-TSS (NM_203418)	-22	promoter	-3.50625	1.67652e-13	3.50625	concordant_down	5	NA	NA	yes	gene_down	tf_rna_missing	coherent_activation_loss	active_promoter	1	0	1	1	1	0	0	0	2	2	0	9	yes	2	EH38D3337389	EH38E2138804	pELS	pELS;PLS	EH38E2138804;EH38E3456316
peak_0048806	TWIST2	Closing	Twist2	TWIST2	known87.motif	chr21	34526436	34527252	RCAN1	-1.3473	5.00017e-08	promoter-TSS (NM_203418)	-22	promoter	-3.50625	1.67652e-13	3.50625	concordant_down	5	NA	NA	yes	gene_down	tf_rna_missing	coherent_activation_loss	active_promoter	1	0	1	1	1	0	0	0	2	2	0	9	yes	2	EH38D3337389	EH38E2138804	pELS	pELS;PLS	EH38E2138804;EH38E3456316
peak_0046766	EBF2	Closing	EBF2	EBF2	known105.motif	chr20	31717267	31718045	ABALON	-2.00694	5.42814e-07	intron (NR_134257, intron 1 of 2)	-3851	gene_body	-1.17015	8.87082e-08	1.17015	concordant_down	4	0	1	yes	gene_down	TF_not_significant	coherent_activation_loss	active_enhancer	0	1	1	1	1	0	0	0	2	2	1	9	yes	3	EH38D5320152	EH38E3426905	dELS	dELS	EH38E3426905;EH38E3426906;EH38E4259202
peak_0046766	GLIS3	Closing	GLIS3	GLIS3	known110.motif	chr20	31717267	31718045	ABALON	-2.00694	5.42814e-07	intron (NR_134257, intron 1 of 2)	-3851	gene_body	-1.17015	8.87082e-08	1.17015	concordant_down	4	0	1	yes	gene_down	TF_not_significant	coherent_activation_loss	active_enhancer	0	1	1	1	1	0	0	0	2	2	1	9	yes	3	EH38D5320152	EH38E3426905	dELS	dELS	EH38E3426905;EH38E3426906;EH38E4259202
peak_0046766	HLF	Closing	HLF	HLF	known39.motif	chr20	31717267	31718045	ABALON	-2.00694	5.42814e-07	intron (NR_134257, intron 1 of 2)	-3851	gene_body	-1.17015	8.87082e-08	1.17015	concordant_down	4	0.261211	1	yes	gene_down	TF_not_significant	coherent_activation_loss	active_enhancer	0	1	1	1	1	0	0	0	2	2	1	9	yes	3	EH38D5320152	EH38E3426905	dELS	dELS	EH38E3426905;EH38E3426906;EH38E4259202
peak_0046766	HOXA10	Closing	Hoxa10	HOXA10	known121.motif	chr20	31717267	31718045	ABALON	-2.00694	5.42814e-07	intron (NR_134257, intron 1 of 2)	-3851	gene_body	-1.17015	8.87082e-08	1.17015	concordant_down	4	-0.836985	1	yes	gene_down	TF_not_significant	coherent_activation_loss	active_enhancer	0	1	1	1	1	0	0	0	2	2	1	9	yes	3	EH38D5320152	EH38E3426905	dELS	dELS	EH38E3426905;EH38E3426906;EH38E4259202
peak_0046766	JUN	Closing	AP-1	JUN;FOS;JUNB;JUND;FOSL1;FOSL2;ATF3;BATF	known7.motif	chr20	31717267	31718045	ABALON	-2.00694	5.42814e-07	intron (NR_134257, intron 1 of 2)	-3851	gene_body	-1.17015	8.87082e-08	1.17015	concordant_down	4	0.329662	1	yes	gene_down	TF_not_significant	coherent_activation_loss	active_enhancer	0	1	1	1	1	0	0	0	2	2	1	9	yes	3	EH38D5320152	EH38E3426905	dELS	dELS	EH38E3426905;EH38E3426906;EH38E4259202
peak_0046766	MYB	Closing	MYB	MYB	known106.motif	chr20	31717267	31718045	ABALON	-2.00694	5.42814e-07	intron (NR_134257, intron 1 of 2)	-3851	gene_body	-1.17015	8.87082e-08	1.17015	concordant_down	4	-0.131766	1	yes	gene_down	TF_not_significant	coherent_activation_loss	active_enhancer	0	1	1	1	1	0	0	0	2	2	1	9	yes	3	EH38D5320152	EH38E3426905	dELS	dELS	EH38E3426905;EH38E3426906;EH38E4259202
peak_0046766	PRDM10	Closing	PRDM10	PRDM10	known117.motif	chr20	31717267	31718045	ABALON	-2.00694	5.42814e-07	intron (NR_134257, intron 1 of 2)	-3851	gene_body	-1.17015	8.87082e-08	1.17015	concordant_down	4	0.292319	0.384812	yes	gene_down	TF_not_significant	coherent_activation_loss	active_enhancer	0	1	1	1	1	0	0	0	2	2	1	9	yes	3	EH38D5320152	EH38E3426905	dELS	dELS	EH38E3426905;EH38E3426906;EH38E4259202
peak_0046766	RUNX1	Closing	RUNX1	RUNX1	known27.motif	chr20	31717267	31718045	ABALON	-2.00694	5.42814e-07	intron (NR_134257, intron 1 of 2)	-3851	gene_body	-1.17015	8.87082e-08	1.17015	concordant_down	4	-0.107419	1	yes	gene_down	TF_not_significant	coherent_activation_loss	active_enhancer	0	1	1	1	1	0	0	0	2	2	1	9	yes	3	EH38D5320152	EH38E3426905	dELS	dELS	EH38E3426905;EH38E3426906;EH38E4259202
peak_0046766	RUNX2	Closing	RUNX2	RUNX2	known34.motif	chr20	31717267	31718045	ABALON	-2.00694	5.42814e-07	intron (NR_134257, intron 1 of 2)	-3851	gene_body	-1.17015	8.87082e-08	1.17015	concordant_down	4	-0.484095	1	yes	gene_down	TF_not_significant	coherent_activation_loss	active_enhancer	0	1	1	1	1	0	0	0	2	2	1	9	yes	3	EH38D5320152	EH38E3426905	dELS	dELS	EH38E3426905;EH38E3426906;EH38E4259202
peak_0046766	STAT4	Closing	STAT4	STAT4	known111.motif	chr20	31717267	31718045	ABALON	-2.00694	5.42814e-07	intron (NR_134257, intron 1 of 2)	-3851	gene_body	-1.17015	8.87082e-08	1.17015	concordant_down	4	-1.35402	1	yes	gene_down	TF_not_significant	coherent_activation_loss	active_enhancer	0	1	1	1	1	0	0	0	2	2	1	9	yes	3	EH38D5320152	EH38E3426905	dELS	dELS	EH38E3426905;EH38E3426906;EH38E4259202
peak_0046766	TCF12	Closing	Tcf12	TCF12	known76.motif	chr20	31717267	31718045	ABALON	-2.00694	5.42814e-07	intron (NR_134257, intron 1 of 2)	-3851	gene_body	-1.17015	8.87082e-08	1.17015	concordant_down	4	-0.264223	0.326118	yes	gene_down	TF_not_significant	coherent_activation_loss	active_enhancer	0	1	1	1	1	0	0	0	2	2	1	9	yes	3	EH38D5320152	EH38E3426905	dELS	dELS	EH38E3426905;EH38E3426906;EH38E4259202
peak_0042810	ATF3	Closing	Atf3	ATF3	known9.motif	chr2	111115989	111116244	ACOXL-AS1	-2.40629	4.4393e-09	promoter-TSS (NR_122074)	-529	promoter	-1.30481	0.510442	1.30481	concordant_down	4	-3.92028	0.000169874	yes	gene_not_significant	TF_down	coherent_activation_loss	bivalent_promoter	1	0	1	1	1	1	0	0	1	2	2	9	yes	1	EH38D5223601	EH38E3364719	pELS	pELS	EH38E3364719
peak_0042810	FOSL1	Closing	Fra1	FOSL1	known4.motif	chr2	111115989	111116244	ACOXL-AS1	-2.40629	4.4393e-09	promoter-TSS (NR_122074)	-529	promoter	-1.30481	0.510442	1.30481	concordant_down	4	-2.84522	0.0038438	yes	gene_not_significant	TF_down	coherent_activation_loss	bivalent_promoter	1	0	1	1	1	1	0	0	1	2	2	9	yes	1	EH38D5223601	EH38E3364719	pELS	pELS	EH38E3364719
peak_0042810	NFATC1	Closing	NFAT	NFATC1;NFATC2;NFATC3;NFATC4	known2.motif	chr2	111115989	111116244	ACOXL-AS1	-2.40629	4.4393e-09	promoter-TSS (NR_122074)	-529	promoter	-1.30481	0.510442	1.30481	concordant_down	4	-0.764829	0.0475296	yes	gene_not_significant	TF_down	coherent_activation_loss	bivalent_promoter	1	0	1	1	1	1	0	0	1	2	2	9	yes	1	EH38D5223601	EH38E3364719	pELS	pELS	EH38E3364719
peak_0042810	NFKB1	Closing	NFkB-p65	NFKB1;RELA;RELB;NFKB2;REL	known10.motif	chr2	111115989	111116244	ACOXL-AS1	-2.40629	4.4393e-09	promoter-TSS (NR_122074)	-529	promoter	-1.30481	0.510442	1.30481	concordant_down	4	-1.24321	1.12356e-09	yes	gene_not_significant	TF_down	coherent_activation_loss	bivalent_promoter	1	0	1	1	1	1	0	0	1	2	2	9	yes	1	EH38D5223601	EH38E3364719	pELS	pELS	EH38E3364719
peak_0042810	TFE3	Closing	TFE3	TFE3	known133.motif	chr2	111115989	111116244	ACOXL-AS1	-2.40629	4.4393e-09	promoter-TSS (NR_122074)	-529	promoter	-1.30481	0.510442	1.30481	concordant_down	4	-0.309485	0.00608454	yes	gene_not_significant	TF_down	coherent_activation_loss	bivalent_promoter	1	0	1	1	1	1	0	0	1	2	2	9	yes	1	EH38D5223601	EH38E3364719	pELS	pELS	EH38E3364719
peak_0015238	ATF1	Closing	Atf1	ATF1	known51.motif	chr11	120431769	120432728	ARHGEF12	-1.30818	3.02948e-06	intron (NM_015313, intron 11 of 40)	46922	gene_body	-1.17686	7.40095e-08	1.17686	concordant_down	4	-0.140149	1	yes	gene_down	TF_not_significant	coherent_activation_loss	active_enhancer	0	1	0	1	1	0	0	0	2	2	1	9	yes	2	EH38D4651594	EH38E2989640	dELS	dELS	EH38E2989640;EH38E2989641
peak_0015238	ATF4	Closing	Atf4	ATF4	known22.motif	chr11	120431769	120432728	ARHGEF12	-1.30818	3.02948e-06	intron (NM_015313, intron 11 of 40)	46922	gene_body	-1.17686	7.40095e-08	1.17686	concordant_down	4	-0.409799	0.158993	yes	gene_down	TF_not_significant	coherent_activation_loss	active_enhancer	0	1	0	1	1	0	0	0	2	2	1	9	yes	2	EH38D4651594	EH38E2989640	dELS	dELS	EH38E2989640;EH38E2989641
peak_0015238	ATF7	Closing	Atf7	ATF7	known43.motif	chr11	120431769	120432728	ARHGEF12	-1.30818	3.02948e-06	intron (NM_015313, intron 11 of 40)	46922	gene_body	-1.17686	7.40095e-08	1.17686	concordant_down	4	0.0262107	1	yes	gene_down	TF_not_significant	coherent_activation_loss	active_enhancer	0	1	0	1	1	0	0	0	2	2	1	9	yes	2	EH38D4651594	EH38E2989640	dELS	dELS	EH38E2989640;EH38E2989641
peak_0015238	BATF	Closing	BATF	BATF	known3.motif	chr11	120431769	120432728	ARHGEF12	-1.30818	3.02948e-06	intron (NM_015313, intron 11 of 40)	46922	gene_body	-1.17686	7.40095e-08	1.17686	concordant_down	4	-0.596918	0.292535	yes	gene_down	TF_not_significant	coherent_activation_loss	active_enhancer	0	1	0	1	1	0	0	0	2	2	1	9	yes	2	EH38D4651594	EH38E2989640	dELS	dELS	EH38E2989640;EH38E2989641
peak_0015238	CREB5	Closing	CREB5	CREB5	known49.motif	chr11	120431769	120432728	ARHGEF12	-1.30818	3.02948e-06	intron (NM_015313, intron 11 of 40)	46922	gene_body	-1.17686	7.40095e-08	1.17686	concordant_down	4	-1.92657	1	yes	gene_down	TF_not_significant	coherent_activation_loss	active_enhancer	0	1	0	1	1	0	0	0	2	2	1	9	yes	2	EH38D4651594	EH38E2989640	dELS	dELS	EH38E2989640;EH38E2989641
peak_0015238	FOS	Closing	Fos	FOS	known5.motif	chr11	120431769	120432728	ARHGEF12	-1.30818	3.02948e-06	intron (NM_015313, intron 11 of 40)	46922	gene_body	-1.17686	7.40095e-08	1.17686	concordant_down	4	0.128665	1	yes	gene_down	TF_not_significant	coherent_activation_loss	active_enhancer	0	1	0	1	1	0	0	0	2	2	1	9	yes	2	EH38D4651594	EH38E2989640	dELS	dELS	EH38E2989640;EH38E2989641
peak_0015238	HLF	Closing	HLF	HLF	known39.motif	chr11	120431769	120432728	ARHGEF12	-1.30818	3.02948e-06	intron (NM_015313, intron 11 of 40)	46922	gene_body	-1.17686	7.40095e-08	1.17686	concordant_down	4	0.261211	1	yes	gene_down	TF_not_significant	coherent_activation_loss	active_enhancer	0	1	0	1	1	0	0	0	2	2	1	9	yes	2	EH38D4651594	EH38E2989640	dELS	dELS	EH38E2989640;EH38E2989641
peak_0015238	HOXA10	Closing	Hoxa10	HOXA10	known121.motif	chr11	120431769	120432728	ARHGEF12	-1.30818	3.02948e-06	intron (NM_015313, intron 11 of 40)	46922	gene_body	-1.17686	7.40095e-08	1.17686	concordant_down	4	-0.836985	1	yes	gene_down	TF_not_significant	coherent_activation_loss	active_enhancer	0	1	0	1	1	0	0	0	2	2	1	9	yes	2	EH38D4651594	EH38E2989640	dELS	dELS	EH38E2989640;EH38E2989641
peak_0015238	IRF1	Closing	IRF1	IRF1	known42.motif	chr11	120431769	120432728	ARHGEF12	-1.30818	3.02948e-06	intron (NM_015313, intron 11 of 40)	46922	gene_body	-1.17686	7.40095e-08	1.17686	concordant_down	4	-0.0697303	1	yes	gene_down	TF_not_significant	coherent_activation_loss	active_enhancer	0	1	0	1	1	0	0	0	2	2	1	9	yes	2	EH38D4651594	EH38E2989640	dELS	dELS	EH38E2989640;EH38E2989641
peak_0015238	IRF2	Closing	IRF2	IRF2	known50.motif	chr11	120431769	120432728	ARHGEF12	-1.30818	3.02948e-06	intron (NM_015313, intron 11 of 40)	46922	gene_body	-1.17686	7.40095e-08	1.17686	concordant_down	4	-0.203996	0.786722	yes	gene_down	TF_not_significant	coherent_activation_loss	active_enhancer	0	1	0	1	1	0	0	0	2	2	1	9	yes	2	EH38D4651594	EH38E2989640	dELS	dELS	EH38E2989640;EH38E2989641
peak_0015238	IRF3	Closing	IRF3	IRF3	known35.motif	chr11	120431769	120432728	ARHGEF12	-1.30818	3.02948e-06	intron (NM_015313, intron 11 of 40)	46922	gene_body	-1.17686	7.40095e-08	1.17686	concordant_down	4	0.497583	0.0732312	yes	gene_down	TF_not_significant	coherent_activation_loss	active_enhancer	0	1	0	1	1	0	0	0	2	2	1	9	yes	2	EH38D4651594	EH38E2989640	dELS	dELS	EH38E2989640;EH38E2989641
peak_0015238	IRF8	Closing	IRF8	IRF8	known33.motif	chr11	120431769	120432728	ARHGEF12	-1.30818	3.02948e-06	intron (NM_015313, intron 11 of 40)	46922	gene_body	-1.17686	7.40095e-08	1.17686	concordant_down	4	0.319825	0.975928	yes	gene_down	TF_not_significant	coherent_activation_loss	active_enhancer	0	1	0	1	1	0	0	0	2	2	1	9	yes	2	EH38D4651594	EH38E2989640	dELS	dELS	EH38E2989640;EH38E2989641
peak_0015238	JUN	Closing	Jun-AP1	JUN	known12.motif	chr11	120431769	120432728	ARHGEF12	-1.30818	3.02948e-06	intron (NM_015313, intron 11 of 40)	46922	gene_body	-1.17686	7.40095e-08	1.17686	concordant_down	4	0.329662	1	yes	gene_down	TF_not_significant	coherent_activation_loss	active_enhancer	0	1	0	1	1	0	0	0	2	2	1	9	yes	2	EH38D4651594	EH38E2989640	dELS	dELS	EH38E2989640;EH38E2989641
peak_0015238	JUN	Closing	AP-1	JUN;FOS;JUNB;JUND;FOSL1;FOSL2;ATF3;BATF	known7.motif	chr11	120431769	120432728	ARHGEF12	-1.30818	3.02948e-06	intron (NM_015313, intron 11 of 40)	46922	gene_body	-1.17686	7.40095e-08	1.17686	concordant_down	4	0.329662	1	yes	gene_down	TF_not_significant	coherent_activation_loss	active_enhancer	0	1	0	1	1	0	0	0	2	2	1	9	yes	2	EH38D4651594	EH38E2989640	dELS	dELS	EH38E2989640;EH38E2989641
peak_0015238	JUNB	Closing	JunB	JUNB	known6.motif	chr11	120431769	120432728	ARHGEF12	-1.30818	3.02948e-06	intron (NM_015313, intron 11 of 40)	46922	gene_body	-1.17686	7.40095e-08	1.17686	concordant_down	4	0.338285	1	yes	gene_down	TF_not_significant	coherent_activation_loss	active_enhancer	0	1	0	1	1	0	0	0	2	2	1	9	yes	2	EH38D4651594	EH38E2989640	dELS	dELS	EH38E2989640;EH38E2989641
peak_0015238	KLF14	Closing	KLF14	KLF14	known55.motif	chr11	120431769	120432728	ARHGEF12	-1.30818	3.02948e-06	intron (NM_015313, intron 11 of 40)	46922	gene_body	-1.17686	7.40095e-08	1.17686	concordant_down	4	0.424493	1	yes	gene_down	TF_not_significant	coherent_activation_loss	active_enhancer	0	1	0	1	1	0	0	0	2	2	1	9	yes	2	EH38D4651594	EH38E2989640	dELS	dELS	EH38E2989640;EH38E2989641
peak_0015238	MYB	Closing	MYB	MYB	known106.motif	chr11	120431769	120432728	ARHGEF12	-1.30818	3.02948e-06	intron (NM_015313, intron 11 of 40)	46922	gene_body	-1.17686	7.40095e-08	1.17686	concordant_down	4	-0.131766	1	yes	gene_down	TF_not_significant	coherent_activation_loss	active_enhancer	0	1	0	1	1	0	0	0	2	2	1	9	yes	2	EH38D4651594	EH38E2989640	dELS	dELS	EH38E2989640;EH38E2989641
peak_0015238	NEUROG2	Closing	NeuroG2	NEUROG2	known116.motif	chr11	120431769	120432728	ARHGEF12	-1.30818	3.02948e-06	intron (NM_015313, intron 11 of 40)	46922	gene_body	-1.17686	7.40095e-08	1.17686	concordant_down	4	-0.836985	1	yes	gene_down	TF_not_significant	coherent_activation_loss	active_enhancer	0	1	0	1	1	0	0	0	2	2	1	9	yes	2	EH38D4651594	EH38E2989640	dELS	dELS	EH38E2989640;EH38E2989641
peak_0015238	NFIL3	Closing	NFIL3	NFIL3	known38.motif	chr11	120431769	120432728	ARHGEF12	-1.30818	3.02948e-06	intron (NM_015313, intron 11 of 40)	46922	gene_body	-1.17686	7.40095e-08	1.17686	concordant_down	4	-0.00380348	1	yes	gene_down	TF_not_significant	coherent_activation_loss	active_enhancer	0	1	0	1	1	0	0	0	2	2	1	9	yes	2	EH38D4651594	EH38E2989640	dELS	dELS	EH38E2989640;EH38E2989641
peak_0015238	PAX5	Closing	PAX5	PAX5	known135.motif	chr11	120431769	120432728	ARHGEF12	-1.30818	3.02948e-06	intron (NM_015313, intron 11 of 40)	46922	gene_body	-1.17686	7.40095e-08	1.17686	concordant_down	4	-0.192664	1	yes	gene_down	TF_not_significant	coherent_activation_loss	active_enhancer	0	1	0	1	1	0	0	0	2	2	1	9	yes	2	EH38D4651594	EH38E2989640	dELS	dELS	EH38E2989640;EH38E2989641
peak_0015238	PAX8	Closing	Pax8	PAX8	known84.motif	chr11	120431769	120432728	ARHGEF12	-1.30818	3.02948e-06	intron (NM_015313, intron 11 of 40)	46922	gene_body	-1.17686	7.40095e-08	1.17686	concordant_down	4	0.0163715	1	yes	gene_down	TF_not_significant	coherent_activation_loss	active_enhancer	0	1	0	1	1	0	0	0	2	2	1	9	yes	2	EH38D4651594	EH38E2989640	dELS	dELS	EH38E2989640;EH38E2989641
peak_0015238	POU2F2	Closing	Oct2	POU2F2	known21.motif	chr11	120431769	120432728	ARHGEF12	-1.30818	3.02948e-06	intron (NM_015313, intron 11 of 40)	46922	gene_body	-1.17686	7.40095e-08	1.17686	concordant_down	4	-0.371429	0.104995	yes	gene_down	TF_not_significant	coherent_activation_loss	active_enhancer	0	1	0	1	1	0	0	0	2	2	1	9	yes	2	EH38D4651594	EH38E2989640	dELS	dELS	EH38E2989640;EH38E2989641
peak_0015238	POU2F3	Closing	Oct11	POU2F3	known25.motif	chr11	120431769	120432728	ARHGEF12	-1.30818	3.02948e-06	intron (NM_015313, intron 11 of 40)	46922	gene_body	-1.17686	7.40095e-08	1.17686	concordant_down	4	-1.36363	1	yes	gene_down	TF_not_significant	coherent_activation_loss	active_enhancer	0	1	0	1	1	0	0	0	2	2	1	9	yes	2	EH38D4651594	EH38E2989640	dELS	dELS	EH38E2989640;EH38E2989641
peak_0015238	POU3F3	Closing	Brn1	POU3F3	known19.motif	chr11	120431769	120432728	ARHGEF12	-1.30818	3.02948e-06	intron (NM_015313, intron 11 of 40)	46922	gene_body	-1.17686	7.40095e-08	1.17686	concordant_down	4	1.01905	1	yes	gene_down	TF_not_significant	coherent_activation_loss	active_enhancer	0	1	0	1	1	0	0	0	2	2	1	9	yes	2	EH38D4651594	EH38E2989640	dELS	dELS	EH38E2989640;EH38E2989641
peak_0015238	POU5F1	Closing	Oct4	POU5F1	known20.motif	chr11	120431769	120432728	ARHGEF12	-1.30818	3.02948e-06	intron (NM_015313, intron 11 of 40)	46922	gene_body	-1.17686	7.40095e-08	1.17686	concordant_down	4	0.714636	1	yes	gene_down	TF_not_significant	coherent_activation_loss	active_enhancer	0	1	0	1	1	0	0	0	2	2	1	9	yes	2	EH38D4651594	EH38E2989640	dELS	dELS	EH38E2989640;EH38E2989641
peak_0015238	PRDM10	Closing	PRDM10	PRDM10	known117.motif	chr11	120431769	120432728	ARHGEF12	-1.30818	3.02948e-06	intron (NM_015313, intron 11 of 40)	46922	gene_body	-1.17686	7.40095e-08	1.17686	concordant_down	4	0.292319	0.384812	yes	gene_down	TF_not_significant	coherent_activation_loss	active_enhancer	0	1	0	1	1	0	0	0	2	2	1	9	yes	2	EH38D4651594	EH38E2989640	dELS	dELS	EH38E2989640;EH38E2989641
peak_0015238	RELA	Closing	NFkB-p65-Rel	RELA;REL	known14.motif	chr11	120431769	120432728	ARHGEF12	-1.30818	3.02948e-06	intron (NM_015313, intron 11 of 40)	46922	gene_body	-1.17686	7.40095e-08	1.17686	concordant_down	4	0.0602568	1	yes	gene_down	TF_not_significant	coherent_activation_loss	active_enhancer	0	1	0	1	1	0	0	0	2	2	1	9	yes	2	EH38D4651594	EH38E2989640	dELS	dELS	EH38E2989640;EH38E2989641
peak_0015238	RUNX1	Closing	RUNX1	RUNX1	known27.motif	chr11	120431769	120432728	ARHGEF12	-1.30818	3.02948e-06	intron (NM_015313, intron 11 of 40)	46922	gene_body	-1.17686	7.40095e-08	1.17686	concordant_down	4	-0.107419	1	yes	gene_down	TF_not_significant	coherent_activation_loss	active_enhancer	0	1	0	1	1	0	0	0	2	2	1	9	yes	2	EH38D4651594	EH38E2989640	dELS	dELS	EH38E2989640;EH38E2989641
peak_0015238	RUNX2	Closing	RUNX2	RUNX2	known34.motif	chr11	120431769	120432728	ARHGEF12	-1.30818	3.02948e-06	intron (NM_015313, intron 11 of 40)	46922	gene_body	-1.17686	7.40095e-08	1.17686	concordant_down	4	-0.484095	1	yes	gene_down	TF_not_significant	coherent_activation_loss	active_enhancer	0	1	0	1	1	0	0	0	2	2	1	9	yes	2	EH38D4651594	EH38E2989640	dELS	dELS	EH38E2989640;EH38E2989641
peak_0015238	STAT4	Closing	STAT4	STAT4	known111.motif	chr11	120431769	120432728	ARHGEF12	-1.30818	3.02948e-06	intron (NM_015313, intron 11 of 40)	46922	gene_body	-1.17686	7.40095e-08	1.17686	concordant_down	4	-1.35402	1	yes	gene_down	TF_not_significant	coherent_activation_loss	active_enhancer	0	1	0	1	1	0	0	0	2	2	1	9	yes	2	EH38D4651594	EH38E2989640	dELS	dELS	EH38E2989640;EH38E2989641
peak_0015238	TCF4	Closing	TCF4	TCF4	known128.motif	chr11	120431769	120432728	ARHGEF12	-1.30818	3.02948e-06	intron (NM_015313, intron 11 of 40)	46922	gene_body	-1.17686	7.40095e-08	1.17686	concordant_down	4	-0.0799037	1	yes	gene_down	TF_not_significant	coherent_activation_loss	active_enhancer	0	1	0	1	1	0	0	0	2	2	1	9	yes	2	EH38D4651594	EH38E2989640	dELS	dELS	EH38E2989640;EH38E2989641
peak_0045586	BATF	Closing	BATF	BATF	known3.motif	chr2	231167942	231168663	ARMC9	-1.59857	2.0737e-05	intron (NM_001191037, intron 22 of 23)	-30328	gene_body	-1.37283	0.0100423	1.37283	concordant_down	4	-0.596918	0.292535	yes	gene_down	TF_not_significant	coherent_activation_loss	active_enhancer	0	1	0	1	1	0	0	1	2	2	1	9	yes	1	EH38D5287579	EH38E3406016	dELS	dELS	EH38E3406016
peak_0045586	BHLHA15	Closing	BHLHA15	BHLHA15	known92.motif	chr2	231167942	231168663	ARMC9	-1.59857	2.0737e-05	intron (NM_001191037, intron 22 of 23)	-30328	gene_body	-1.37283	0.0100423	1.37283	concordant_down	4	-0.00604192	1	yes	gene_down	TF_not_significant	coherent_activation_loss	active_enhancer	0	1	0	1	1	0	0	1	2	2	1	9	yes	1	EH38D5287579	EH38E3406016	dELS	dELS	EH38E3406016
peak_0045586	EGR1	Closing	Egr1	EGR1	known15.motif	chr2	231167942	231168663	ARMC9	-1.59857	2.0737e-05	intron (NM_001191037, intron 22 of 23)	-30328	gene_body	-1.37283	0.0100423	1.37283	concordant_down	4	-1.49241	0.648521	yes	gene_down	TF_not_significant	coherent_activation_loss	active_enhancer	0	1	0	1	1	0	0	1	2	2	1	9	yes	1	EH38D5287579	EH38E3406016	dELS	dELS	EH38E3406016
peak_0045586	FLI1	Closing	Fli1	FLI1	known59.motif	chr2	231167942	231168663	ARMC9	-1.59857	2.0737e-05	intron (NM_001191037, intron 22 of 23)	-30328	gene_body	-1.37283	0.0100423	1.37283	concordant_down	4	0.453465	0.170815	yes	gene_down	TF_not_significant	coherent_activation_loss	active_enhancer	0	1	0	1	1	0	0	1	2	2	1	9	yes	1	EH38D5287579	EH38E3406016	dELS	dELS	EH38E3406016
peak_0045586	FOS	Closing	Fos	FOS	known5.motif	chr2	231167942	231168663	ARMC9	-1.59857	2.0737e-05	intron (NM_001191037, intron 22 of 23)	-30328	gene_body	-1.37283	0.0100423	1.37283	concordant_down	4	0.128665	1	yes	gene_down	TF_not_significant	coherent_activation_loss	active_enhancer	0	1	0	1	1	0	0	1	2	2	1	9	yes	1	EH38D5287579	EH38E3406016	dELS	dELS	EH38E3406016
peak_0045586	IRF3	Closing	IRF3	IRF3	known35.motif	chr2	231167942	231168663	ARMC9	-1.59857	2.0737e-05	intron (NM_001191037, intron 22 of 23)	-30328	gene_body	-1.37283	0.0100423	1.37283	concordant_down	4	0.497583	0.0732312	yes	gene_down	TF_not_significant	coherent_activation_loss	active_enhancer	0	1	0	1	1	0	0	1	2	2	1	9	yes	1	EH38D5287579	EH38E3406016	dELS	dELS	EH38E3406016
peak_0045586	JUN	Closing	AP-1	JUN;FOS;JUNB;JUND;FOSL1;FOSL2;ATF3;BATF	known7.motif	chr2	231167942	231168663	ARMC9	-1.59857	2.0737e-05	intron (NM_001191037, intron 22 of 23)	-30328	gene_body	-1.37283	0.0100423	1.37283	concordant_down	4	0.329662	1	yes	gene_down	TF_not_significant	coherent_activation_loss	active_enhancer	0	1	0	1	1	0	0	1	2	2	1	9	yes	1	EH38D5287579	EH38E3406016	dELS	dELS	EH38E3406016
peak_0045586	JUNB	Closing	JunB	JUNB	known6.motif	chr2	231167942	231168663	ARMC9	-1.59857	2.0737e-05	intron (NM_001191037, intron 22 of 23)	-30328	gene_body	-1.37283	0.0100423	1.37283	concordant_down	4	0.338285	1	yes	gene_down	TF_not_significant	coherent_activation_loss	active_enhancer	0	1	0	1	1	0	0	1	2	2	1	9	yes	1	EH38D5287579	EH38E3406016	dELS	dELS	EH38E3406016
peak_0045586	MITF	Closing	MITF	MITF	known41.motif	chr2	231167942	231168663	ARMC9	-1.59857	2.0737e-05	intron (NM_001191037, intron 22 of 23)	-30328	gene_body	-1.37283	0.0100423	1.37283	concordant_down	4	0	1	yes	gene_down	TF_not_significant	coherent_activation_loss	active_enhancer	0	1	0	1	1	0	0	1	2	2	1	9	yes	1	EH38D5287579	EH38E3406016	dELS	dELS	EH38E3406016
peak_0045586	MYB	Closing	MYB	MYB	known106.motif	chr2	231167942	231168663	ARMC9	-1.59857	2.0737e-05	intron (NM_001191037, intron 22 of 23)	-30328	gene_body	-1.37283	0.0100423	1.37283	concordant_down	4	-0.131766	1	yes	gene_down	TF_not_significant	coherent_activation_loss	active_enhancer	0	1	0	1	1	0	0	1	2	2	1	9	yes	1	EH38D5287579	EH38E3406016	dELS	dELS	EH38E3406016
peak_0045586	POU2F2	Closing	Oct2	POU2F2	known21.motif	chr2	231167942	231168663	ARMC9	-1.59857	2.0737e-05	intron (NM_001191037, intron 22 of 23)	-30328	gene_body	-1.37283	0.0100423	1.37283	concordant_down	4	-0.371429	0.104995	yes	gene_down	TF_not_significant	coherent_activation_loss	active_enhancer	0	1	0	1	1	0	0	1	2	2	1	9	yes	1	EH38D5287579	EH38E3406016	dELS	dELS	EH38E3406016
peak_0045586	SPI1	Closing	PU.1	SPI1	known40.motif	chr2	231167942	231168663	ARMC9	-1.59857	2.0737e-05	intron (NM_001191037, intron 22 of 23)	-30328	gene_body	-1.37283	0.0100423	1.37283	concordant_down	4	0.124323	1	yes	gene_down	TF_not_significant	coherent_activation_loss	active_enhancer	0	1	0	1	1	0	0	1	2	2	1	9	yes	1	EH38D5287579	EH38E3406016	dELS	dELS	EH38E3406016
peak_0045586	ZNF189	Closing	ZNF189	ZNF189	known112.motif	chr2	231167942	231168663	ARMC9	-1.59857	2.0737e-05	intron (NM_001191037, intron 22 of 23)	-30328	gene_body	-1.37283	0.0100423	1.37283	concordant_down	4	-0.0296017	1	yes	gene_down	TF_not_significant	coherent_activation_loss	active_enhancer	0	1	0	1	1	0	0	1	2	2	1	9	yes	1	EH38D5287579	EH38E3406016	dELS	dELS	EH38E3406016
peak_0062605	ATF1	Closing	Atf1	ATF1	known51.motif	chr5	132751517	132751819	CCNI2	-2.04871	7.74751e-06	3' UTR (NM_001098811, exon 10 of 10)	4223	gene_body	-1.10802	0.0399294	1.10802	concordant_down	4	-0.140149	1	yes	gene_down	TF_not_significant	coherent_activation_loss	active_enhancer	0	1	0	1	1	0	0	0	2	2	1	9	yes	2	EH38D3759965	EH38E2408803	dELS	dELS	EH38E2408803;EH38E3660799
peak_0062605	ATF2	Closing	Atf2	ATF2	known58.motif	chr5	132751517	132751819	CCNI2	-2.04871	7.74751e-06	3' UTR (NM_001098811, exon 10 of 10)	4223	gene_body	-1.10802	0.0399294	1.10802	concordant_down	4	-0.14068	0.757734	yes	gene_down	TF_not_significant	coherent_activation_loss	active_enhancer	0	1	0	1	1	0	0	0	2	2	1	9	yes	2	EH38D3759965	EH38E2408803	dELS	dELS	EH38E2408803;EH38E3660799
peak_0062605	ATF7	Closing	Atf7	ATF7	known43.motif	chr5	132751517	132751819	CCNI2	-2.04871	7.74751e-06	3' UTR (NM_001098811, exon 10 of 10)	4223	gene_body	-1.10802	0.0399294	1.10802	concordant_down	4	0.0262107	1	yes	gene_down	TF_not_significant	coherent_activation_loss	active_enhancer	0	1	0	1	1	0	0	0	2	2	1	9	yes	2	EH38D3759965	EH38E2408803	dELS	dELS	EH38E2408803;EH38E3660799
peak_0062605	CREB5	Closing	CREB5	CREB5	known49.motif	chr5	132751517	132751819	CCNI2	-2.04871	7.74751e-06	3' UTR (NM_001098811, exon 10 of 10)	4223	gene_body	-1.10802	0.0399294	1.10802	concordant_down	4	-1.92657	1	yes	gene_down	TF_not_significant	coherent_activation_loss	active_enhancer	0	1	0	1	1	0	0	0	2	2	1	9	yes	2	EH38D3759965	EH38E2408803	dELS	dELS	EH38E2408803;EH38E3660799
peak_0062605	EBF2	Closing	EBF2	EBF2	known105.motif	chr5	132751517	132751819	CCNI2	-2.04871	7.74751e-06	3' UTR (NM_001098811, exon 10 of 10)	4223	gene_body	-1.10802	0.0399294	1.10802	concordant_down	4	0	1	yes	gene_down	TF_not_significant	coherent_activation_loss	active_enhancer	0	1	0	1	1	0	0	0	2	2	1	9	yes	2	EH38D3759965	EH38E2408803	dELS	dELS	EH38E2408803;EH38E3660799
peak_0062605	HOXA10	Closing	Hoxa10	HOXA10	known121.motif	chr5	132751517	132751819	CCNI2	-2.04871	7.74751e-06	3' UTR (NM_001098811, exon 10 of 10)	4223	gene_body	-1.10802	0.0399294	1.10802	concordant_down	4	-0.836985	1	yes	gene_down	TF_not_significant	coherent_activation_loss	active_enhancer	0	1	0	1	1	0	0	0	2	2	1	9	yes	2	EH38D3759965	EH38E2408803	dELS	dELS	EH38E2408803;EH38E3660799
peak_0062605	JUND	Closing	JunD	JUND	known115.motif	chr5	132751517	132751819	CCNI2	-2.04871	7.74751e-06	3' UTR (NM_001098811, exon 10 of 10)	4223	gene_body	-1.10802	0.0399294	1.10802	concordant_down	4	0.218663	1	yes	gene_down	TF_not_significant	coherent_activation_loss	active_enhancer	0	1	0	1	1	0	0	0	2	2	1	9	yes	2	EH38D3759965	EH38E2408803	dELS	dELS	EH38E2408803;EH38E3660799
peak_0062605	MITF	Closing	MITF	MITF	known41.motif	chr5	132751517	132751819	CCNI2	-2.04871	7.74751e-06	3' UTR (NM_001098811, exon 10 of 10)	4223	gene_body	-1.10802	0.0399294	1.10802	concordant_down	4	0	1	yes	gene_down	TF_not_significant	coherent_activation_loss	active_enhancer	0	1	0	1	1	0	0	0	2	2	1	9	yes	2	EH38D3759965	EH38E2408803	dELS	dELS	EH38E2408803;EH38E3660799
peak_0062605	NFIL3	Closing	NFIL3	NFIL3	known38.motif	chr5	132751517	132751819	CCNI2	-2.04871	7.74751e-06	3' UTR (NM_001098811, exon 10 of 10)	4223	gene_body	-1.10802	0.0399294	1.10802	concordant_down	4	-0.00380348	1	yes	gene_down	TF_not_significant	coherent_activation_loss	active_enhancer	0	1	0	1	1	0	0	0	2	2	1	9	yes	2	EH38D3759965	EH38E2408803	dELS	dELS	EH38E2408803;EH38E3660799
peak_0062605	RFX6	Closing	Rfx6	RFX6	known127.motif	chr5	132751517	132751819	CCNI2	-2.04871	7.74751e-06	3' UTR (NM_001098811, exon 10 of 10)	4223	gene_body	-1.10802	0.0399294	1.10802	concordant_down	4	0.245026	1	yes	gene_down	TF_not_significant	coherent_activation_loss	active_enhancer	0	1	0	1	1	0	0	0	2	2	1	9	yes	2	EH38D3759965	EH38E2408803	dELS	dELS	EH38E2408803;EH38E3660799
peak_0077199	EHF	Closing	EHF	EHF	known75.motif	chr9	5451550	5451937	CD274	-1.09432	0.00152554	intron (NR_052005, intron 1 of 7)	1202	gene_body	-1.35172	0.00034583	1.35172	concordant_down	4	1.70243	0.699136	yes	gene_down	TF_not_significant	coherent_activation_loss	active_enhancer	0	1	1	1	1	0	0	0	2	2	1	9	yes	2	EH38D6010087	EH38E3872911	pELS	pELS	EH38E3872911;EH38E3872912
peak_0077199	ELF3	Closing	ELF3	ELF3	known61.motif	chr9	5451550	5451937	CD274	-1.09432	0.00152554	intron (NR_052005, intron 1 of 7)	1202	gene_body	-1.35172	0.00034583	1.35172	concordant_down	4	0.0741507	1	yes	gene_down	TF_not_significant	coherent_activation_loss	active_enhancer	0	1	1	1	1	0	0	0	2	2	1	9	yes	2	EH38D6010087	EH38E3872911	pELS	pELS	EH38E3872911;EH38E3872912
peak_0077199	ELF4	Closing	Elf4	ELF4	known66.motif	chr9	5451550	5451937	CD274	-1.09432	0.00152554	intron (NR_052005, intron 1 of 7)	1202	gene_body	-1.35172	0.00034583	1.35172	concordant_down	4	0.216507	0.71809	yes	gene_down	TF_not_significant	coherent_activation_loss	active_enhancer	0	1	1	1	1	0	0	0	2	2	1	9	yes	2	EH38D6010087	EH38E3872911	pELS	pELS	EH38E3872911;EH38E3872912
peak_0077199	ELF5	Closing	ELF5	ELF5	known44.motif	chr9	5451550	5451937	CD274	-1.09432	0.00152554	intron (NR_052005, intron 1 of 7)	1202	gene_body	-1.35172	0.00034583	1.35172	concordant_down	4	0	1	yes	gene_down	TF_not_significant	coherent_activation_loss	active_enhancer	0	1	1	1	1	0	0	0	2	2	1	9	yes	2	EH38D6010087	EH38E3872911	pELS	pELS	EH38E3872911;EH38E3872912
peak_0077199	GLI2	Closing	Gli2	GLI2	known107.motif	chr9	5451550	5451937	CD274	-1.09432	0.00152554	intron (NR_052005, intron 1 of 7)	1202	gene_body	-1.35172	0.00034583	1.35172	concordant_down	4	0.245026	1	yes	gene_down	TF_not_significant	coherent_activation_loss	active_enhancer	0	1	1	1	1	0	0	0	2	2	1	9	yes	2	EH38D6010087	EH38E3872911	pELS	pELS	EH38E3872911;EH38E3872912
peak_0077199	IRF3	Closing	IRF3	IRF3	known35.motif	chr9	5451550	5451937	CD274	-1.09432	0.00152554	intron (NR_052005, intron 1 of 7)	1202	gene_body	-1.35172	0.00034583	1.35172	concordant_down	4	0.497583	0.0732312	yes	gene_down	TF_not_significant	coherent_activation_loss	active_enhancer	0	1	1	1	1	0	0	0	2	2	1	9	yes	2	EH38D6010087	EH38E3872911	pELS	pELS	EH38E3872911;EH38E3872912
peak_0077199	IRF8	Closing	IRF8	IRF8	known33.motif	chr9	5451550	5451937	CD274	-1.09432	0.00152554	intron (NR_052005, intron 1 of 7)	1202	gene_body	-1.35172	0.00034583	1.35172	concordant_down	4	0.319825	0.975928	yes	gene_down	TF_not_significant	coherent_activation_loss	active_enhancer	0	1	1	1	1	0	0	0	2	2	1	9	yes	2	EH38D6010087	EH38E3872911	pELS	pELS	EH38E3872911;EH38E3872912
peak_0077199	LEF1	Closing	LEF1	LEF1	known101.motif	chr9	5451550	5451937	CD274	-1.09432	0.00152554	intron (NR_052005, intron 1 of 7)	1202	gene_body	-1.35172	0.00034583	1.35172	concordant_down	4	0.0231861	1	yes	gene_down	TF_not_significant	coherent_activation_loss	active_enhancer	0	1	1	1	1	0	0	0	2	2	1	9	yes	2	EH38D6010087	EH38E3872911	pELS	pELS	EH38E3872911;EH38E3872912
peak_0077199	MITF	Closing	MITF	MITF	known41.motif	chr9	5451550	5451937	CD274	-1.09432	0.00152554	intron (NR_052005, intron 1 of 7)	1202	gene_body	-1.35172	0.00034583	1.35172	concordant_down	4	0	1	yes	gene_down	TF_not_significant	coherent_activation_loss	active_enhancer	0	1	1	1	1	0	0	0	2	2	1	9	yes	2	EH38D6010087	EH38E3872911	pELS	pELS	EH38E3872911;EH38E3872912
peak_0077199	MNT	Closing	MNT	MNT	known100.motif	chr9	5451550	5451937	CD274	-1.09432	0.00152554	intron (NR_052005, intron 1 of 7)	1202	gene_body	-1.35172	0.00034583	1.35172	concordant_down	4	-0.067775	1	yes	gene_down	TF_not_significant	coherent_activation_loss	active_enhancer	0	1	1	1	1	0	0	0	2	2	1	9	yes	2	EH38D6010087	EH38E3872911	pELS	pELS	EH38E3872911;EH38E3872912
peak_0077199	MYB	Closing	MYB	MYB	known106.motif	chr9	5451550	5451937	CD274	-1.09432	0.00152554	intron (NR_052005, intron 1 of 7)	1202	gene_body	-1.35172	0.00034583	1.35172	concordant_down	4	-0.131766	1	yes	gene_down	TF_not_significant	coherent_activation_loss	active_enhancer	0	1	1	1	1	0	0	0	2	2	1	9	yes	2	EH38D6010087	EH38E3872911	pELS	pELS	EH38E3872911;EH38E3872912
peak_0077199	MYNN	Closing	MYNN	MYNN	known124.motif	chr9	5451550	5451937	CD274	-1.09432	0.00152554	intron (NR_052005, intron 1 of 7)	1202	gene_body	-1.35172	0.00034583	1.35172	concordant_down	4	-0.150089	0.529844	yes	gene_down	TF_not_significant	coherent_activation_loss	active_enhancer	0	1	1	1	1	0	0	0	2	2	1	9	yes	2	EH38D6010087	EH38E3872911	pELS	pELS	EH38E3872911;EH38E3872912
peak_0077199	RUNX2	Closing	RUNX2	RUNX2	known34.motif	chr9	5451550	5451937	CD274	-1.09432	0.00152554	intron (NR_052005, intron 1 of 7)	1202	gene_body	-1.35172	0.00034583	1.35172	concordant_down	4	-0.484095	1	yes	gene_down	TF_not_significant	coherent_activation_loss	active_enhancer	0	1	1	1	1	0	0	0	2	2	1	9	yes	2	EH38D6010087	EH38E3872911	pELS	pELS	EH38E3872911;EH38E3872912
peak_0077199	STAT4	Closing	STAT4	STAT4	known111.motif	chr9	5451550	5451937	CD274	-1.09432	0.00152554	intron (NR_052005, intron 1 of 7)	1202	gene_body	-1.35172	0.00034583	1.35172	concordant_down	4	-1.35402	1	yes	gene_down	TF_not_significant	coherent_activation_loss	active_enhancer	0	1	1	1	1	0	0	0	2	2	1	9	yes	2	EH38D6010087	EH38E3872911	pELS	pELS	EH38E3872911;EH38E3872912
peak_0077199	TCF4	Closing	TCF4	TCF4	known128.motif	chr9	5451550	5451937	CD274	-1.09432	0.00152554	intron (NR_052005, intron 1 of 7)	1202	gene_body	-1.35172	0.00034583	1.35172	concordant_down	4	-0.0799037	1	yes	gene_down	TF_not_significant	coherent_activation_loss	active_enhancer	0	1	1	1	1	0	0	0	2	2	1	9	yes	2	EH38D6010087	EH38E3872911	pELS	pELS	EH38E3872911;EH38E3872912
peak_0077199	USF2	Closing	Usf2	USF2	known71.motif	chr9	5451550	5451937	CD274	-1.09432	0.00152554	intron (NR_052005, intron 1 of 7)	1202	gene_body	-1.35172	0.00034583	1.35172	concordant_down	4	0.208644	0.323008	yes	gene_down	TF_not_significant	coherent_activation_loss	active_enhancer	0	1	1	1	1	0	0	0	2	2	1	9	yes	2	EH38D6010087	EH38E3872911	pELS	pELS	EH38E3872911;EH38E3872912
peak_0082663	NFKB1	Closing	NFkB-p65	NFKB1;RELA;RELB;NFKB2;REL	known10.motif	chrX	136687435	136687740	CD40LG	-2.3082	2.93727e-05	intron (NM_001306177, intron 10 of 20)	39411	gene_body	-3.05162	1.39233e-09	3.05162	concordant_down	4	-1.24321	1.12356e-09	yes	gene_down	TF_down	coherent_activation_loss	primed_enhancer	0	1	0	0	1	0	0	0	1	2	2	9	yes	1	EH38D6133981	EH38E3946367	dELS	dELS	EH38E3946367
peak_0024465	ASCL1	Opening	Ascl1	ASCL1	known1.motif	chr14	95286737	95287142	CLMN	1.11077	1.19732e-05	intron (NM_024734, intron 1 of 12)	32968	gene_body	1.70575	2.85888e-06	1.70575	concordant_up	4	0	1	yes	gene_up	TF_not_significant	coherent_activation_gain	active_enhancer	0	1	0	1	1	0	0	0	2	2	1	9	yes	1	EH38D4842274	EH38E3113470	dELS	dELS	EH38E3113470
peak_0024465	ASCL2	Opening	Ascl2	ASCL2	known13.motif	chr14	95286737	95287142	CLMN	1.11077	1.19732e-05	intron (NM_024734, intron 1 of 12)	32968	gene_body	1.70575	2.85888e-06	1.70575	concordant_up	4	0.302007	1	yes	gene_up	TF_not_significant	coherent_activation_gain	active_enhancer	0	1	0	1	1	0	0	0	2	2	1	9	yes	1	EH38D4842274	EH38E3113470	dELS	dELS	EH38E3113470
peak_0024465	EOMES	Opening	Eomes	EOMES	known21.motif	chr14	95286737	95287142	CLMN	1.11077	1.19732e-05	intron (NM_024734, intron 1 of 12)	32968	gene_body	1.70575	2.85888e-06	1.70575	concordant_up	4	0	1	yes	gene_up	TF_not_significant	coherent_activation_gain	active_enhancer	0	1	0	1	1	0	0	0	2	2	1	9	yes	1	EH38D4842274	EH38E3113470	dELS	dELS	EH38E3113470
peak_0024465	SNAI1	Opening	Snail1	SNAI1	known12.motif	chr14	95286737	95287142	CLMN	1.11077	1.19732e-05	intron (NM_024734, intron 1 of 12)	32968	gene_body	1.70575	2.85888e-06	1.70575	concordant_up	4	-0.628517	1	yes	gene_up	TF_not_significant	coherent_activation_gain	active_enhancer	0	1	0	1	1	0	0	0	2	2	1	9	yes	1	EH38D4842274	EH38E3113470	dELS	dELS	EH38E3113470
peak_0024465	TCF12	Opening	HEB	TCF12	known4.motif	chr14	95286737	95287142	CLMN	1.11077	1.19732e-05	intron (NM_024734, intron 1 of 12)	32968	gene_body	1.70575	2.85888e-06	1.70575	concordant_up	4	-0.264223	0.326118	yes	gene_up	TF_not_significant	coherent_activation_gain	active_enhancer	0	1	0	1	1	0	0	0	2	2	1	9	yes	1	EH38D4842274	EH38E3113470	dELS	dELS	EH38E3113470
peak_0024465	TCF3	Opening	E2A	TCF3	known10.motif	chr14	95286737	95287142	CLMN	1.11077	1.19732e-05	intron (NM_024734, intron 1 of 12)	32968	gene_body	1.70575	2.85888e-06	1.70575	concordant_up	4	0.218273	1	yes	gene_up	TF_not_significant	coherent_activation_gain	active_enhancer	0	1	0	1	1	0	0	0	2	2	1	9	yes	1	EH38D4842274	EH38E3113470	dELS	dELS	EH38E3113470
peak_0024465	TCF3	Opening	E2A	TCF3	known11.motif	chr14	95286737	95287142	CLMN	1.11077	1.19732e-05	intron (NM_024734, intron 1 of 12)	32968	gene_body	1.70575	2.85888e-06	1.70575	concordant_up	4	0.218273	1	yes	gene_up	TF_not_significant	coherent_activation_gain	active_enhancer	0	1	0	1	1	0	0	0	2	2	1	9	yes	1	EH38D4842274	EH38E3113470	dELS	dELS	EH38E3113470
peak_0053821	ATF4	Closing	Atf4	ATF4	known22.motif	chr3	100105496	100106220	FILIP1L	-1.1235	0.00734061	intron (NM_001042459, intron 1 of 4)	8655	gene_body	-2.20785	7.77937e-16	2.20785	concordant_down	4	-0.409799	0.158993	yes	gene_down	TF_not_significant	coherent_activation_loss	active_enhancer	0	1	0	1	1	0	0	0	2	2	1	9	yes	2	EH38D3460105	EH38E2221656	dELS	dELS	EH38E2221656;EH38E2221657
peak_0053821	BHLHA15	Closing	BHLHA15	BHLHA15	known92.motif	chr3	100105496	100106220	FILIP1L	-1.1235	0.00734061	intron (NM_001042459, intron 1 of 4)	8655	gene_body	-2.20785	7.77937e-16	2.20785	concordant_down	4	-0.00604192	1	yes	gene_down	TF_not_significant	coherent_activation_loss	active_enhancer	0	1	0	1	1	0	0	0	2	2	1	9	yes	2	EH38D3460105	EH38E2221656	dELS	dELS	EH38E2221656;EH38E2221657
peak_0053821	EBF2	Closing	EBF2	EBF2	known105.motif	chr3	100105496	100106220	FILIP1L	-1.1235	0.00734061	intron (NM_001042459, intron 1 of 4)	8655	gene_body	-2.20785	7.77937e-16	2.20785	concordant_down	4	0	1	yes	gene_down	TF_not_significant	coherent_activation_loss	active_enhancer	0	1	0	1	1	0	0	0	2	2	1	9	yes	2	EH38D3460105	EH38E2221656	dELS	dELS	EH38E2221656;EH38E2221657
peak_0053821	EHF	Closing	EHF	EHF	known75.motif	chr3	100105496	100106220	FILIP1L	-1.1235	0.00734061	intron (NM_001042459, intron 1 of 4)	8655	gene_body	-2.20785	7.77937e-16	2.20785	concordant_down	4	1.70243	0.699136	yes	gene_down	TF_not_significant	coherent_activation_loss	active_enhancer	0	1	0	1	1	0	0	0	2	2	1	9	yes	2	EH38D3460105	EH38E2221656	dELS	dELS	EH38E2221656;EH38E2221657
peak_0053821	GLIS3	Closing	GLIS3	GLIS3	known110.motif	chr3	100105496	100106220	FILIP1L	-1.1235	0.00734061	intron (NM_001042459, intron 1 of 4)	8655	gene_body	-2.20785	7.77937e-16	2.20785	concordant_down	4	0	1	yes	gene_down	TF_not_significant	coherent_activation_loss	active_enhancer	0	1	0	1	1	0	0	0	2	2	1	9	yes	2	EH38D3460105	EH38E2221656	dELS	dELS	EH38E2221656;EH38E2221657
peak_0053821	HLF	Closing	HLF	HLF	known39.motif	chr3	100105496	100106220	FILIP1L	-1.1235	0.00734061	intron (NM_001042459, intron 1 of 4)	8655	gene_body	-2.20785	7.77937e-16	2.20785	concordant_down	4	0.261211	1	yes	gene_down	TF_not_significant	coherent_activation_loss	active_enhancer	0	1	0	1	1	0	0	0	2	2	1	9	yes	2	EH38D3460105	EH38E2221656	dELS	dELS	EH38E2221656;EH38E2221657
peak_0053821	HOXA10	Closing	Hoxa10	HOXA10	known121.motif	chr3	100105496	100106220	FILIP1L	-1.1235	0.00734061	intron (NM_001042459, intron 1 of 4)	8655	gene_body	-2.20785	7.77937e-16	2.20785	concordant_down	4	-0.836985	1	yes	gene_down	TF_not_significant	coherent_activation_loss	active_enhancer	0	1	0	1	1	0	0	0	2	2	1	9	yes	2	EH38D3460105	EH38E2221656	dELS	dELS	EH38E2221656;EH38E2221657
peak_0053821	IRF3	Closing	IRF3	IRF3	known35.motif	chr3	100105496	100106220	FILIP1L	-1.1235	0.00734061	intron (NM_001042459, intron 1 of 4)	8655	gene_body	-2.20785	7.77937e-16	2.20785	concordant_down	4	0.497583	0.0732312	yes	gene_down	TF_not_significant	coherent_activation_loss	active_enhancer	0	1	0	1	1	0	0	0	2	2	1	9	yes	2	EH38D3460105	EH38E2221656	dELS	dELS	EH38E2221656;EH38E2221657
peak_0053821	MEF2A	Closing	Mef2a	MEF2A	known65.motif	chr3	100105496	100106220	FILIP1L	-1.1235	0.00734061	intron (NM_001042459, intron 1 of 4)	8655	gene_body	-2.20785	7.77937e-16	2.20785	concordant_down	4	-0.296281	0.0990156	yes	gene_down	TF_not_significant	coherent_activation_loss	active_enhancer	0	1	0	1	1	0	0	0	2	2	1	9	yes	2	EH38D3460105	EH38E2221656	dELS	dELS	EH38E2221656;EH38E2221657
peak_0053821	MEF2B	Closing	Mef2b	MEF2B	known63.motif	chr3	100105496	100106220	FILIP1L	-1.1235	0.00734061	intron (NM_001042459, intron 1 of 4)	8655	gene_body	-2.20785	7.77937e-16	2.20785	concordant_down	4	-0.867043	0.635595	yes	gene_down	TF_not_significant	coherent_activation_loss	active_enhancer	0	1	0	1	1	0	0	0	2	2	1	9	yes	2	EH38D3460105	EH38E2221656	dELS	dELS	EH38E2221656;EH38E2221657
peak_0053821	MYB	Closing	MYB	MYB	known106.motif	chr3	100105496	100106220	FILIP1L	-1.1235	0.00734061	intron (NM_001042459, intron 1 of 4)	8655	gene_body	-2.20785	7.77937e-16	2.20785	concordant_down	4	-0.131766	1	yes	gene_down	TF_not_significant	coherent_activation_loss	active_enhancer	0	1	0	1	1	0	0	0	2	2	1	9	yes	2	EH38D3460105	EH38E2221656	dELS	dELS	EH38E2221656;EH38E2221657
peak_0053821	NEUROG2	Closing	NeuroG2	NEUROG2	known116.motif	chr3	100105496	100106220	FILIP1L	-1.1235	0.00734061	intron (NM_001042459, intron 1 of 4)	8655	gene_body	-2.20785	7.77937e-16	2.20785	concordant_down	4	-0.836985	1	yes	gene_down	TF_not_significant	coherent_activation_loss	active_enhancer	0	1	0	1	1	0	0	0	2	2	1	9	yes	2	EH38D3460105	EH38E2221656	dELS	dELS	EH38E2221656;EH38E2221657
peak_0053821	NFIL3	Closing	NFIL3	NFIL3	known38.motif	chr3	100105496	100106220	FILIP1L	-1.1235	0.00734061	intron (NM_001042459, intron 1 of 4)	8655	gene_body	-2.20785	7.77937e-16	2.20785	concordant_down	4	-0.00380348	1	yes	gene_down	TF_not_significant	coherent_activation_loss	active_enhancer	0	1	0	1	1	0	0	0	2	2	1	9	yes	2	EH38D3460105	EH38E2221656	dELS	dELS	EH38E2221656;EH38E2221657
peak_0053821	STAT4	Closing	STAT4	STAT4	known111.motif	chr3	100105496	100106220	FILIP1L	-1.1235	0.00734061	intron (NM_001042459, intron 1 of 4)	8655	gene_body	-2.20785	7.77937e-16	2.20785	concordant_down	4	-1.35402	1	yes	gene_down	TF_not_significant	coherent_activation_loss	active_enhancer	0	1	0	1	1	0	0	0	2	2	1	9	yes	2	EH38D3460105	EH38E2221656	dELS	dELS	EH38E2221656;EH38E2221657
peak_0053821	TCF4	Closing	TCF4	TCF4	known128.motif	chr3	100105496	100106220	FILIP1L	-1.1235	0.00734061	intron (NM_001042459, intron 1 of 4)	8655	gene_body	-2.20785	7.77937e-16	2.20785	concordant_down	4	-0.0799037	1	yes	gene_down	TF_not_significant	coherent_activation_loss	active_enhancer	0	1	0	1	1	0	0	0	2	2	1	9	yes	2	EH38D3460105	EH38E2221656	dELS	dELS	EH38E2221656;EH38E2221657
peak_0024221	CLOCK	Closing	CLOCK	CLOCK	known90.motif	chr14	89436364	89436641	FOXN3-AS1	-1.03528	0.0210027	intron (NM_001085471, intron 1 of 6)	19149	gene_body	-1.5977	0.0010693	1.5977	concordant_down	4	-0.162156	1	yes	gene_down	TF_not_significant	coherent_activation_loss	active_enhancer	0	1	0	1	1	0	0	0	2	2	1	9	yes	1	EH38D6236075	EH38E4112924	dELS	dELS	EH38E4112924
peak_0024221	KLF14	Closing	KLF14	KLF14	known55.motif	chr14	89436364	89436641	FOXN3-AS1	-1.03528	0.0210027	intron (NM_001085471, intron 1 of 6)	19149	gene_body	-1.5977	0.0010693	1.5977	concordant_down	4	0.424493	1	yes	gene_down	TF_not_significant	coherent_activation_loss	active_enhancer	0	1	0	1	1	0	0	0	2	2	1	9	yes	1	EH38D6236075	EH38E4112924	dELS	dELS	EH38E4112924
peak_0024221	KLF5	Closing	KLF5	KLF5	known134.motif	chr14	89436364	89436641	FOXN3-AS1	-1.03528	0.0210027	intron (NM_001085471, intron 1 of 6)	19149	gene_body	-1.5977	0.0010693	1.5977	concordant_down	4	0.394372	1	yes	gene_down	TF_not_significant	coherent_activation_loss	active_enhancer	0	1	0	1	1	0	0	0	2	2	1	9	yes	1	EH38D6236075	EH38E4112924	dELS	dELS	EH38E4112924
peak_0024221	MITF	Closing	MITF	MITF	known41.motif	chr14	89436364	89436641	FOXN3-AS1	-1.03528	0.0210027	intron (NM_001085471, intron 1 of 6)	19149	gene_body	-1.5977	0.0010693	1.5977	concordant_down	4	0	1	yes	gene_down	TF_not_significant	coherent_activation_loss	active_enhancer	0	1	0	1	1	0	0	0	2	2	1	9	yes	1	EH38D6236075	EH38E4112924	dELS	dELS	EH38E4112924
peak_0024221	MNT	Closing	MNT	MNT	known100.motif	chr14	89436364	89436641	FOXN3-AS1	-1.03528	0.0210027	intron (NM_001085471, intron 1 of 6)	19149	gene_body	-1.5977	0.0010693	1.5977	concordant_down	4	-0.067775	1	yes	gene_down	TF_not_significant	coherent_activation_loss	active_enhancer	0	1	0	1	1	0	0	0	2	2	1	9	yes	1	EH38D6236075	EH38E4112924	dELS	dELS	EH38E4112924
peak_0024221	RUNX1	Closing	RUNX1	RUNX1	known27.motif	chr14	89436364	89436641	FOXN3-AS1	-1.03528	0.0210027	intron (NM_001085471, intron 1 of 6)	19149	gene_body	-1.5977	0.0010693	1.5977	concordant_down	4	-0.107419	1	yes	gene_down	TF_not_significant	coherent_activation_loss	active_enhancer	0	1	0	1	1	0	0	0	2	2	1	9	yes	1	EH38D6236075	EH38E4112924	dELS	dELS	EH38E4112924
peak_0024221	RUNX2	Closing	RUNX2	RUNX2	known34.motif	chr14	89436364	89436641	FOXN3-AS1	-1.03528	0.0210027	intron (NM_001085471, intron 1 of 6)	19149	gene_body	-1.5977	0.0010693	1.5977	concordant_down	4	-0.484095	1	yes	gene_down	TF_not_significant	coherent_activation_loss	active_enhancer	0	1	0	1	1	0	0	0	2	2	1	9	yes	1	EH38D6236075	EH38E4112924	dELS	dELS	EH38E4112924
peak_0024221	USF2	Closing	Usf2	USF2	known71.motif	chr14	89436364	89436641	FOXN3-AS1	-1.03528	0.0210027	intron (NM_001085471, intron 1 of 6)	19149	gene_body	-1.5977	0.0010693	1.5977	concordant_down	4	0.208644	0.323008	yes	gene_down	TF_not_significant	coherent_activation_loss	active_enhancer	0	1	0	1	1	0	0	0	2	2	1	9	yes	1	EH38D6236075	EH38E4112924	dELS	dELS	EH38E4112924
peak_0069758	EHF	Closing	EHF	EHF	known75.motif	chr7	18503585	18503827	HDAC9	-1.13613	0.00611166	intron (NM_001321896, intron 3 of 12)	-5564	gene_body	-1.19955	0.0247781	1.19955	concordant_down	4	1.70243	0.699136	yes	gene_down	TF_not_significant	coherent_activation_loss	active_enhancer	0	1	0	1	1	0	0	0	2	2	1	9	yes	1	EH38D5834436	EH38E3760246	dELS	dELS	EH38E3760246
peak_0069758	HOXA10	Closing	Hoxa10	HOXA10	known121.motif	chr7	18503585	18503827	HDAC9	-1.13613	0.00611166	intron (NM_001321896, intron 3 of 12)	-5564	gene_body	-1.19955	0.0247781	1.19955	concordant_down	4	-0.836985	1	yes	gene_down	TF_not_significant	coherent_activation_loss	active_enhancer	0	1	0	1	1	0	0	0	2	2	1	9	yes	1	EH38D5834436	EH38E3760246	dELS	dELS	EH38E3760246
peak_0069758	MYNN	Closing	MYNN	MYNN	known124.motif	chr7	18503585	18503827	HDAC9	-1.13613	0.00611166	intron (NM_001321896, intron 3 of 12)	-5564	gene_body	-1.19955	0.0247781	1.19955	concordant_down	4	-0.150089	0.529844	yes	gene_down	TF_not_significant	coherent_activation_loss	active_enhancer	0	1	0	1	1	0	0	0	2	2	1	9	yes	1	EH38D5834436	EH38E3760246	dELS	dELS	EH38E3760246
peak_0069758	POU2F2	Closing	Oct2	POU2F2	known21.motif	chr7	18503585	18503827	HDAC9	-1.13613	0.00611166	intron (NM_001321896, intron 3 of 12)	-5564	gene_body	-1.19955	0.0247781	1.19955	concordant_down	4	-0.371429	0.104995	yes	gene_down	TF_not_significant	coherent_activation_loss	active_enhancer	0	1	0	1	1	0	0	0	2	2	1	9	yes	1	EH38D5834436	EH38E3760246	dELS	dELS	EH38E3760246
peak_0069758	RUNX1	Closing	RUNX1	RUNX1	known27.motif	chr7	18503585	18503827	HDAC9	-1.13613	0.00611166	intron (NM_001321896, intron 3 of 12)	-5564	gene_body	-1.19955	0.0247781	1.19955	concordant_down	4	-0.107419	1	yes	gene_down	TF_not_significant	coherent_activation_loss	active_enhancer	0	1	0	1	1	0	0	0	2	2	1	9	yes	1	EH38D5834436	EH38E3760246	dELS	dELS	EH38E3760246
peak_0069758	RUNX2	Closing	RUNX2	RUNX2	known34.motif	chr7	18503585	18503827	HDAC9	-1.13613	0.00611166	intron (NM_001321896, intron 3 of 12)	-5564	gene_body	-1.19955	0.0247781	1.19955	concordant_down	4	-0.484095	1	yes	gene_down	TF_not_significant	coherent_activation_loss	active_enhancer	0	1	0	1	1	0	0	0	2	2	1	9	yes	1	EH38D5834436	EH38E3760246	dELS	dELS	EH38E3760246
peak_0004211	ASCL2	Closing	Ascl2	ASCL2	known104.motif	chr1	116628175	116629198	IGSF3	-1.01544	1.28393e-06	intron (NM_001007237, intron 2 of 10)	39046	gene_body	-2.00627	0.0266534	2.00627	concordant_down	4	0.302007	1	yes	gene_down	TF_not_significant	coherent_activation_loss	active_enhancer	0	1	1	1	1	1	0	0	2	2	1	9	yes	2	EH38D2215459	EH38E1379764	dELS	dELS	EH38E1379764;EH38E2833486
peak_0004211	ATOH1	Closing	Atoh1	ATOH1	known102.motif	chr1	116628175	116629198	IGSF3	-1.01544	1.28393e-06	intron (NM_001007237, intron 2 of 10)	39046	gene_body	-2.00627	0.0266534	2.00627	concordant_down	4	0	1	yes	gene_down	TF_not_significant	coherent_activation_loss	active_enhancer	0	1	1	1	1	1	0	0	2	2	1	9	yes	2	EH38D2215459	EH38E1379764	dELS	dELS	EH38E1379764;EH38E2833486
peak_0004211	BHLHA15	Closing	BHLHA15	BHLHA15	known92.motif	chr1	116628175	116629198	IGSF3	-1.01544	1.28393e-06	intron (NM_001007237, intron 2 of 10)	39046	gene_body	-2.00627	0.0266534	2.00627	concordant_down	4	-0.00604192	1	yes	gene_down	TF_not_significant	coherent_activation_loss	active_enhancer	0	1	1	1	1	1	0	0	2	2	1	9	yes	2	EH38D2215459	EH38E1379764	dELS	dELS	EH38E1379764;EH38E2833486
peak_0004211	CLOCK	Closing	CLOCK	CLOCK	known90.motif	chr1	116628175	116629198	IGSF3	-1.01544	1.28393e-06	intron (NM_001007237, intron 2 of 10)	39046	gene_body	-2.00627	0.0266534	2.00627	concordant_down	4	-0.162156	1	yes	gene_down	TF_not_significant	coherent_activation_loss	active_enhancer	0	1	1	1	1	1	0	0	2	2	1	9	yes	2	EH38D2215459	EH38E1379764	dELS	dELS	EH38E1379764;EH38E2833486
peak_0004211	EBF2	Closing	EBF2	EBF2	known105.motif	chr1	116628175	116629198	IGSF3	-1.01544	1.28393e-06	intron (NM_001007237, intron 2 of 10)	39046	gene_body	-2.00627	0.0266534	2.00627	concordant_down	4	0	1	yes	gene_down	TF_not_significant	coherent_activation_loss	active_enhancer	0	1	1	1	1	1	0	0	2	2	1	9	yes	2	EH38D2215459	EH38E1379764	dELS	dELS	EH38E1379764;EH38E2833486
peak_0004211	EGR1	Closing	Egr1	EGR1	known15.motif	chr1	116628175	116629198	IGSF3	-1.01544	1.28393e-06	intron (NM_001007237, intron 2 of 10)	39046	gene_body	-2.00627	0.0266534	2.00627	concordant_down	4	-1.49241	0.648521	yes	gene_down	TF_not_significant	coherent_activation_loss	active_enhancer	0	1	1	1	1	1	0	0	2	2	1	9	yes	2	EH38D2215459	EH38E1379764	dELS	dELS	EH38E1379764;EH38E2833486
peak_0004211	EHF	Closing	EHF	EHF	known75.motif	chr1	116628175	116629198	IGSF3	-1.01544	1.28393e-06	intron (NM_001007237, intron 2 of 10)	39046	gene_body	-2.00627	0.0266534	2.00627	concordant_down	4	1.70243	0.699136	yes	gene_down	TF_not_significant	coherent_activation_loss	active_enhancer	0	1	1	1	1	1	0	0	2	2	1	9	yes	2	EH38D2215459	EH38E1379764	dELS	dELS	EH38E1379764;EH38E2833486
peak_0004211	ERG	Closing	ERG	ERG	known81.motif	chr1	116628175	116629198	IGSF3	-1.01544	1.28393e-06	intron (NM_001007237, intron 2 of 10)	39046	gene_body	-2.00627	0.0266534	2.00627	concordant_down	4	0.605698	1	yes	gene_down	TF_not_significant	coherent_activation_loss	active_enhancer	0	1	1	1	1	1	0	0	2	2	1	9	yes	2	EH38D2215459	EH38E1379764	dELS	dELS	EH38E1379764;EH38E2833486
peak_0004211	ETV2	Closing	Etv2	ETV2	known48.motif	chr1	116628175	116629198	IGSF3	-1.01544	1.28393e-06	intron (NM_001007237, intron 2 of 10)	39046	gene_body	-2.00627	0.0266534	2.00627	concordant_down	4	-0.123413	1	yes	gene_down	TF_not_significant	coherent_activation_loss	active_enhancer	0	1	1	1	1	1	0	0	2	2	1	9	yes	2	EH38D2215459	EH38E1379764	dELS	dELS	EH38E1379764;EH38E2833486
peak_0004211	GLI2	Closing	Gli2	GLI2	known107.motif	chr1	116628175	116629198	IGSF3	-1.01544	1.28393e-06	intron (NM_001007237, intron 2 of 10)	39046	gene_body	-2.00627	0.0266534	2.00627	concordant_down	4	0.245026	1	yes	gene_down	TF_not_significant	coherent_activation_loss	active_enhancer	0	1	1	1	1	1	0	0	2	2	1	9	yes	2	EH38D2215459	EH38E1379764	dELS	dELS	EH38E1379764;EH38E2833486
peak_0004211	GLIS3	Closing	GLIS3	GLIS3	known110.motif	chr1	116628175	116629198	IGSF3	-1.01544	1.28393e-06	intron (NM_001007237, intron 2 of 10)	39046	gene_body	-2.00627	0.0266534	2.00627	concordant_down	4	0	1	yes	gene_down	TF_not_significant	coherent_activation_loss	active_enhancer	0	1	1	1	1	1	0	0	2	2	1	9	yes	2	EH38D2215459	EH38E1379764	dELS	dELS	EH38E1379764;EH38E2833486
peak_0004211	HOXA10	Closing	Hoxa10	HOXA10	known121.motif	chr1	116628175	116629198	IGSF3	-1.01544	1.28393e-06	intron (NM_001007237, intron 2 of 10)	39046	gene_body	-2.00627	0.0266534	2.00627	concordant_down	4	-0.836985	1	yes	gene_down	TF_not_significant	coherent_activation_loss	active_enhancer	0	1	1	1	1	1	0	0	2	2	1	9	yes	2	EH38D2215459	EH38E1379764	dELS	dELS	EH38E1379764;EH38E2833486
peak_0004211	KLF14	Closing	KLF14	KLF14	known55.motif	chr1	116628175	116629198	IGSF3	-1.01544	1.28393e-06	intron (NM_001007237, intron 2 of 10)	39046	gene_body	-2.00627	0.0266534	2.00627	concordant_down	4	0.424493	1	yes	gene_down	TF_not_significant	coherent_activation_loss	active_enhancer	0	1	1	1	1	1	0	0	2	2	1	9	yes	2	EH38D2215459	EH38E1379764	dELS	dELS	EH38E1379764;EH38E2833486
peak_0004211	KLF5	Closing	KLF5	KLF5	known134.motif	chr1	116628175	116629198	IGSF3	-1.01544	1.28393e-06	intron (NM_001007237, intron 2 of 10)	39046	gene_body	-2.00627	0.0266534	2.00627	concordant_down	4	0.394372	1	yes	gene_down	TF_not_significant	coherent_activation_loss	active_enhancer	0	1	1	1	1	1	0	0	2	2	1	9	yes	2	EH38D2215459	EH38E1379764	dELS	dELS	EH38E1379764;EH38E2833486
peak_0004211	MEF2A	Closing	Mef2a	MEF2A	known65.motif	chr1	116628175	116629198	IGSF3	-1.01544	1.28393e-06	intron (NM_001007237, intron 2 of 10)	39046	gene_body	-2.00627	0.0266534	2.00627	concordant_down	4	-0.296281	0.0990156	yes	gene_down	TF_not_significant	coherent_activation_loss	active_enhancer	0	1	1	1	1	1	0	0	2	2	1	9	yes	2	EH38D2215459	EH38E1379764	dELS	dELS	EH38E1379764;EH38E2833486
peak_0004211	MEF2B	Closing	Mef2b	MEF2B	known63.motif	chr1	116628175	116629198	IGSF3	-1.01544	1.28393e-06	intron (NM_001007237, intron 2 of 10)	39046	gene_body	-2.00627	0.0266534	2.00627	concordant_down	4	-0.867043	0.635595	yes	gene_down	TF_not_significant	coherent_activation_loss	active_enhancer	0	1	1	1	1	1	0	0	2	2	1	9	yes	2	EH38D2215459	EH38E1379764	dELS	dELS	EH38E1379764;EH38E2833486
peak_0004211	MEF2C	Closing	Mef2c	MEF2C	known52.motif	chr1	116628175	116629198	IGSF3	-1.01544	1.28393e-06	intron (NM_001007237, intron 2 of 10)	39046	gene_body	-2.00627	0.0266534	2.00627	concordant_down	4	-0.251466	1	yes	gene_down	TF_not_significant	coherent_activation_loss	active_enhancer	0	1	1	1	1	1	0	0	2	2	1	9	yes	2	EH38D2215459	EH38E1379764	dELS	dELS	EH38E1379764;EH38E2833486
peak_0004211	MEF2D	Closing	Mef2d	MEF2D	known46.motif	chr1	116628175	116629198	IGSF3	-1.01544	1.28393e-06	intron (NM_001007237, intron 2 of 10)	39046	gene_body	-2.00627	0.0266534	2.00627	concordant_down	4	-0.0668923	1	yes	gene_down	TF_not_significant	coherent_activation_loss	active_enhancer	0	1	1	1	1	1	0	0	2	2	1	9	yes	2	EH38D2215459	EH38E1379764	dELS	dELS	EH38E1379764;EH38E2833486
peak_0004211	MNT	Closing	MNT	MNT	known100.motif	chr1	116628175	116629198	IGSF3	-1.01544	1.28393e-06	intron (NM_001007237, intron 2 of 10)	39046	gene_body	-2.00627	0.0266534	2.00627	concordant_down	4	-0.067775	1	yes	gene_down	TF_not_significant	coherent_activation_loss	active_enhancer	0	1	1	1	1	1	0	0	2	2	1	9	yes	2	EH38D2215459	EH38E1379764	dELS	dELS	EH38E1379764;EH38E2833486
peak_0004211	MYNN	Closing	MYNN	MYNN	known124.motif	chr1	116628175	116629198	IGSF3	-1.01544	1.28393e-06	intron (NM_001007237, intron 2 of 10)	39046	gene_body	-2.00627	0.0266534	2.00627	concordant_down	4	-0.150089	0.529844	yes	gene_down	TF_not_significant	coherent_activation_loss	active_enhancer	0	1	1	1	1	1	0	0	2	2	1	9	yes	2	EH38D2215459	EH38E1379764	dELS	dELS	EH38E1379764;EH38E2833486
peak_0004211	NEUROG2	Closing	NeuroG2	NEUROG2	known116.motif	chr1	116628175	116629198	IGSF3	-1.01544	1.28393e-06	intron (NM_001007237, intron 2 of 10)	39046	gene_body	-2.00627	0.0266534	2.00627	concordant_down	4	-0.836985	1	yes	gene_down	TF_not_significant	coherent_activation_loss	active_enhancer	0	1	1	1	1	1	0	0	2	2	1	9	yes	2	EH38D2215459	EH38E1379764	dELS	dELS	EH38E1379764;EH38E2833486
peak_0004211	RUNX1	Closing	RUNX1	RUNX1	known27.motif	chr1	116628175	116629198	IGSF3	-1.01544	1.28393e-06	intron (NM_001007237, intron 2 of 10)	39046	gene_body	-2.00627	0.0266534	2.00627	concordant_down	4	-0.107419	1	yes	gene_down	TF_not_significant	coherent_activation_loss	active_enhancer	0	1	1	1	1	1	0	0	2	2	1	9	yes	2	EH38D2215459	EH38E1379764	dELS	dELS	EH38E1379764;EH38E2833486
peak_0004211	RUNX2	Closing	RUNX2	RUNX2	known34.motif	chr1	116628175	116629198	IGSF3	-1.01544	1.28393e-06	intron (NM_001007237, intron 2 of 10)	39046	gene_body	-2.00627	0.0266534	2.00627	concordant_down	4	-0.484095	1	yes	gene_down	TF_not_significant	coherent_activation_loss	active_enhancer	0	1	1	1	1	1	0	0	2	2	1	9	yes	2	EH38D2215459	EH38E1379764	dELS	dELS	EH38E1379764;EH38E2833486
peak_0004211	TCF4	Closing	TCF4	TCF4	known128.motif	chr1	116628175	116629198	IGSF3	-1.01544	1.28393e-06	intron (NM_001007237, intron 2 of 10)	39046	gene_body	-2.00627	0.0266534	2.00627	concordant_down	4	-0.0799037	1	yes	gene_down	TF_not_significant	coherent_activation_loss	active_enhancer	0	1	1	1	1	1	0	0	2	2	1	9	yes	2	EH38D2215459	EH38E1379764	dELS	dELS	EH38E1379764;EH38E2833486
peak_0004211	USF2	Closing	Usf2	USF2	known71.motif	chr1	116628175	116629198	IGSF3	-1.01544	1.28393e-06	intron (NM_001007237, intron 2 of 10)	39046	gene_body	-2.00627	0.0266534	2.00627	concordant_down	4	0.208644	0.323008	yes	gene_down	TF_not_significant	coherent_activation_loss	active_enhancer	0	1	1	1	1	1	0	0	2	2	1	9	yes	2	EH38D2215459	EH38E1379764	dELS	dELS	EH38E1379764;EH38E2833486
peak_0004213	ASCL2	Closing	Ascl2	ASCL2	known104.motif	chr1	116637490	116638000	IGSF3	-1.83368	2.06798e-08	intron (NM_001007237, intron 2 of 10)	29988	gene_body	-2.00627	0.0266534	2.00627	concordant_down	4	0.302007	1	yes	gene_down	TF_not_significant	coherent_activation_loss	active_enhancer	0	1	1	1	1	1	0	0	2	2	1	9	yes	2	EH38D2215471	EH38E1379776	dELS	dELS	EH38E1379776;EH38E2833493
peak_0004213	BATF	Closing	BATF	BATF	known3.motif	chr1	116637490	116638000	IGSF3	-1.83368	2.06798e-08	intron (NM_001007237, intron 2 of 10)	29988	gene_body	-2.00627	0.0266534	2.00627	concordant_down	4	-0.596918	0.292535	yes	gene_down	TF_not_significant	coherent_activation_loss	active_enhancer	0	1	1	1	1	1	0	0	2	2	1	9	yes	2	EH38D2215471	EH38E1379776	dELS	dELS	EH38E1379776;EH38E2833493
peak_0004213	BHLHA15	Closing	BHLHA15	BHLHA15	known92.motif	chr1	116637490	116638000	IGSF3	-1.83368	2.06798e-08	intron (NM_001007237, intron 2 of 10)	29988	gene_body	-2.00627	0.0266534	2.00627	concordant_down	4	-0.00604192	1	yes	gene_down	TF_not_significant	coherent_activation_loss	active_enhancer	0	1	1	1	1	1	0	0	2	2	1	9	yes	2	EH38D2215471	EH38E1379776	dELS	dELS	EH38E1379776;EH38E2833493
peak_0004213	EHF	Closing	EHF	EHF	known75.motif	chr1	116637490	116638000	IGSF3	-1.83368	2.06798e-08	intron (NM_001007237, intron 2 of 10)	29988	gene_body	-2.00627	0.0266534	2.00627	concordant_down	4	1.70243	0.699136	yes	gene_down	TF_not_significant	coherent_activation_loss	active_enhancer	0	1	1	1	1	1	0	0	2	2	1	9	yes	2	EH38D2215471	EH38E1379776	dELS	dELS	EH38E1379776;EH38E2833493
peak_0004213	FOS	Closing	Fos	FOS	known5.motif	chr1	116637490	116638000	IGSF3	-1.83368	2.06798e-08	intron (NM_001007237, intron 2 of 10)	29988	gene_body	-2.00627	0.0266534	2.00627	concordant_down	4	0.128665	1	yes	gene_down	TF_not_significant	coherent_activation_loss	active_enhancer	0	1	1	1	1	1	0	0	2	2	1	9	yes	2	EH38D2215471	EH38E1379776	dELS	dELS	EH38E1379776;EH38E2833493
peak_0004213	HOXA10	Closing	Hoxa10	HOXA10	known121.motif	chr1	116637490	116638000	IGSF3	-1.83368	2.06798e-08	intron (NM_001007237, intron 2 of 10)	29988	gene_body	-2.00627	0.0266534	2.00627	concordant_down	4	-0.836985	1	yes	gene_down	TF_not_significant	coherent_activation_loss	active_enhancer	0	1	1	1	1	1	0	0	2	2	1	9	yes	2	EH38D2215471	EH38E1379776	dELS	dELS	EH38E1379776;EH38E2833493
peak_0004213	JUN	Closing	AP-1	JUN;FOS;JUNB;JUND;FOSL1;FOSL2;ATF3;BATF	known7.motif	chr1	116637490	116638000	IGSF3	-1.83368	2.06798e-08	intron (NM_001007237, intron 2 of 10)	29988	gene_body	-2.00627	0.0266534	2.00627	concordant_down	4	0.329662	1	yes	gene_down	TF_not_significant	coherent_activation_loss	active_enhancer	0	1	1	1	1	1	0	0	2	2	1	9	yes	2	EH38D2215471	EH38E1379776	dELS	dELS	EH38E1379776;EH38E2833493
peak_0004213	JUNB	Closing	JunB	JUNB	known6.motif	chr1	116637490	116638000	IGSF3	-1.83368	2.06798e-08	intron (NM_001007237, intron 2 of 10)	29988	gene_body	-2.00627	0.0266534	2.00627	concordant_down	4	0.338285	1	yes	gene_down	TF_not_significant	coherent_activation_loss	active_enhancer	0	1	1	1	1	1	0	0	2	2	1	9	yes	2	EH38D2215471	EH38E1379776	dELS	dELS	EH38E1379776;EH38E2833493
peak_0004213	MAZ	Closing	Maz	MAZ	known64.motif	chr1	116637490	116638000	IGSF3	-1.83368	2.06798e-08	intron (NM_001007237, intron 2 of 10)	29988	gene_body	-2.00627	0.0266534	2.00627	concordant_down	4	-0.0810828	1	yes	gene_down	TF_not_significant	coherent_activation_loss	active_enhancer	0	1	1	1	1	1	0	0	2	2	1	9	yes	2	EH38D2215471	EH38E1379776	dELS	dELS	EH38E1379776;EH38E2833493
peak_0004213	MITF	Closing	MITF	MITF	known41.motif	chr1	116637490	116638000	IGSF3	-1.83368	2.06798e-08	intron (NM_001007237, intron 2 of 10)	29988	gene_body	-2.00627	0.0266534	2.00627	concordant_down	4	0	1	yes	gene_down	TF_not_significant	coherent_activation_loss	active_enhancer	0	1	1	1	1	1	0	0	2	2	1	9	yes	2	EH38D2215471	EH38E1379776	dELS	dELS	EH38E1379776;EH38E2833493
peak_0004213	POU3F3	Closing	Brn1	POU3F3	known19.motif	chr1	116637490	116638000	IGSF3	-1.83368	2.06798e-08	intron (NM_001007237, intron 2 of 10)	29988	gene_body	-2.00627	0.0266534	2.00627	concordant_down	4	1.01905	1	yes	gene_down	TF_not_significant	coherent_activation_loss	active_enhancer	0	1	1	1	1	1	0	0	2	2	1	9	yes	2	EH38D2215471	EH38E1379776	dELS	dELS	EH38E1379776;EH38E2833493
peak_0004213	POU5F1	Closing	Oct4	POU5F1	known20.motif	chr1	116637490	116638000	IGSF3	-1.83368	2.06798e-08	intron (NM_001007237, intron 2 of 10)	29988	gene_body	-2.00627	0.0266534	2.00627	concordant_down	4	0.714636	1	yes	gene_down	TF_not_significant	coherent_activation_loss	active_enhancer	0	1	1	1	1	1	0	0	2	2	1	9	yes	2	EH38D2215471	EH38E1379776	dELS	dELS	EH38E1379776;EH38E2833493
peak_0004213	STAT4	Closing	STAT4	STAT4	known111.motif	chr1	116637490	116638000	IGSF3	-1.83368	2.06798e-08	intron (NM_001007237, intron 2 of 10)	29988	gene_body	-2.00627	0.0266534	2.00627	concordant_down	4	-1.35402	1	yes	gene_down	TF_not_significant	coherent_activation_loss	active_enhancer	0	1	1	1	1	1	0	0	2	2	1	9	yes	2	EH38D2215471	EH38E1379776	dELS	dELS	EH38E1379776;EH38E2833493
peak_0004213	TCF12	Closing	Tcf12	TCF12	known76.motif	chr1	116637490	116638000	IGSF3	-1.83368	2.06798e-08	intron (NM_001007237, intron 2 of 10)	29988	gene_body	-2.00627	0.0266534	2.00627	concordant_down	4	-0.264223	0.326118	yes	gene_down	TF_not_significant	coherent_activation_loss	active_enhancer	0	1	1	1	1	1	0	0	2	2	1	9	yes	2	EH38D2215471	EH38E1379776	dELS	dELS	EH38E1379776;EH38E2833493
peak_0004213	USF2	Closing	Usf2	USF2	known71.motif	chr1	116637490	116638000	IGSF3	-1.83368	2.06798e-08	intron (NM_001007237, intron 2 of 10)	29988	gene_body	-2.00627	0.0266534	2.00627	concordant_down	4	0.208644	0.323008	yes	gene_down	TF_not_significant	coherent_activation_loss	active_enhancer	0	1	1	1	1	1	0	0	2	2	1	9	yes	2	EH38D2215471	EH38E1379776	dELS	dELS	EH38E1379776;EH38E2833493
peak_0004213	ZNF189	Closing	ZNF189	ZNF189	known112.motif	chr1	116637490	116638000	IGSF3	-1.83368	2.06798e-08	intron (NM_001007237, intron 2 of 10)	29988	gene_body	-2.00627	0.0266534	2.00627	concordant_down	4	-0.0296017	1	yes	gene_down	TF_not_significant	coherent_activation_loss	active_enhancer	0	1	1	1	1	1	0	0	2	2	1	9	yes	2	EH38D2215471	EH38E1379776	dELS	dELS	EH38E1379776;EH38E2833493
peak_0064195	EBF2	Closing	EBF2	EBF2	known105.motif	chr6	506350	507097	IRF4	-1.90476	2.53248e-05	intron (NM_018303, intron 23 of 27)	114972	gene_body	-1.96215	1.03297e-08	1.96215	concordant_down	4	0	1	yes	gene_down	TF_not_significant	coherent_activation_loss	active_enhancer	0	1	0	1	1	0	0	0	2	2	1	9	yes	2	EH38D5722041	EH38E3685122	dELS	dELS	EH38E3685122;EH38E4392050
peak_0064195	EGR1	Closing	Egr1	EGR1	known15.motif	chr6	506350	507097	IRF4	-1.90476	2.53248e-05	intron (NM_018303, intron 23 of 27)	114972	gene_body	-1.96215	1.03297e-08	1.96215	concordant_down	4	-1.49241	0.648521	yes	gene_down	TF_not_significant	coherent_activation_loss	active_enhancer	0	1	0	1	1	0	0	0	2	2	1	9	yes	2	EH38D5722041	EH38E3685122	dELS	dELS	EH38E3685122;EH38E4392050
peak_0064195	ELF4	Closing	Elf4	ELF4	known66.motif	chr6	506350	507097	IRF4	-1.90476	2.53248e-05	intron (NM_018303, intron 23 of 27)	114972	gene_body	-1.96215	1.03297e-08	1.96215	concordant_down	4	0.216507	0.71809	yes	gene_down	TF_not_significant	coherent_activation_loss	active_enhancer	0	1	0	1	1	0	0	0	2	2	1	9	yes	2	EH38D5722041	EH38E3685122	dELS	dELS	EH38E3685122;EH38E4392050
peak_0064195	ERG	Closing	ERG	ERG	known81.motif	chr6	506350	507097	IRF4	-1.90476	2.53248e-05	intron (NM_018303, intron 23 of 27)	114972	gene_body	-1.96215	1.03297e-08	1.96215	concordant_down	4	0.605698	1	yes	gene_down	TF_not_significant	coherent_activation_loss	active_enhancer	0	1	0	1	1	0	0	0	2	2	1	9	yes	2	EH38D5722041	EH38E3685122	dELS	dELS	EH38E3685122;EH38E4392050
peak_0064195	ETS1	Closing	ETS1	ETS1	known47.motif	chr6	506350	507097	IRF4	-1.90476	2.53248e-05	intron (NM_018303, intron 23 of 27)	114972	gene_body	-1.96215	1.03297e-08	1.96215	concordant_down	4	0.148395	0.873217	yes	gene_down	TF_not_significant	coherent_activation_loss	active_enhancer	0	1	0	1	1	0	0	0	2	2	1	9	yes	2	EH38D5722041	EH38E3685122	dELS	dELS	EH38E3685122;EH38E4392050
peak_0064195	ETV1	Closing	ETV1	ETV1	known68.motif	chr6	506350	507097	IRF4	-1.90476	2.53248e-05	intron (NM_018303, intron 23 of 27)	114972	gene_body	-1.96215	1.03297e-08	1.96215	concordant_down	4	-0.476315	1	yes	gene_down	TF_not_significant	coherent_activation_loss	active_enhancer	0	1	0	1	1	0	0	0	2	2	1	9	yes	2	EH38D5722041	EH38E3685122	dELS	dELS	EH38E3685122;EH38E4392050
peak_0064195	ETV2	Closing	Etv2	ETV2	known48.motif	chr6	506350	507097	IRF4	-1.90476	2.53248e-05	intron (NM_018303, intron 23 of 27)	114972	gene_body	-1.96215	1.03297e-08	1.96215	concordant_down	4	-0.123413	1	yes	gene_down	TF_not_significant	coherent_activation_loss	active_enhancer	0	1	0	1	1	0	0	0	2	2	1	9	yes	2	EH38D5722041	EH38E3685122	dELS	dELS	EH38E3685122;EH38E4392050
peak_0064195	ETV4	Closing	ETV4	ETV4	known113.motif	chr6	506350	507097	IRF4	-1.90476	2.53248e-05	intron (NM_018303, intron 23 of 27)	114972	gene_body	-1.96215	1.03297e-08	1.96215	concordant_down	4	-0.401784	1	yes	gene_down	TF_not_significant	coherent_activation_loss	active_enhancer	0	1	0	1	1	0	0	0	2	2	1	9	yes	2	EH38D5722041	EH38E3685122	dELS	dELS	EH38E3685122;EH38E4392050
peak_0064195	FLI1	Closing	Fli1	FLI1	known59.motif	chr6	506350	507097	IRF4	-1.90476	2.53248e-05	intron (NM_018303, intron 23 of 27)	114972	gene_body	-1.96215	1.03297e-08	1.96215	concordant_down	4	0.453465	0.170815	yes	gene_down	TF_not_significant	coherent_activation_loss	active_enhancer	0	1	0	1	1	0	0	0	2	2	1	9	yes	2	EH38D5722041	EH38E3685122	dELS	dELS	EH38E3685122;EH38E4392050
peak_0064195	GABPA	Closing	GABPA	GABPA	known99.motif	chr6	506350	507097	IRF4	-1.90476	2.53248e-05	intron (NM_018303, intron 23 of 27)	114972	gene_body	-1.96215	1.03297e-08	1.96215	concordant_down	4	-0.175586	0.446906	yes	gene_down	TF_not_significant	coherent_activation_loss	active_enhancer	0	1	0	1	1	0	0	0	2	2	1	9	yes	2	EH38D5722041	EH38E3685122	dELS	dELS	EH38E3685122;EH38E4392050
peak_0064195	GLI2	Closing	Gli2	GLI2	known107.motif	chr6	506350	507097	IRF4	-1.90476	2.53248e-05	intron (NM_018303, intron 23 of 27)	114972	gene_body	-1.96215	1.03297e-08	1.96215	concordant_down	4	0.245026	1	yes	gene_down	TF_not_significant	coherent_activation_loss	active_enhancer	0	1	0	1	1	0	0	0	2	2	1	9	yes	2	EH38D5722041	EH38E3685122	dELS	dELS	EH38E3685122;EH38E4392050
peak_0064195	GLIS3	Closing	GLIS3	GLIS3	known110.motif	chr6	506350	507097	IRF4	-1.90476	2.53248e-05	intron (NM_018303, intron 23 of 27)	114972	gene_body	-1.96215	1.03297e-08	1.96215	concordant_down	4	0	1	yes	gene_down	TF_not_significant	coherent_activation_loss	active_enhancer	0	1	0	1	1	0	0	0	2	2	1	9	yes	2	EH38D5722041	EH38E3685122	dELS	dELS	EH38E3685122;EH38E4392050
peak_0064195	JUN	Closing	AP-1	JUN;FOS;JUNB;JUND;FOSL1;FOSL2;ATF3;BATF	known7.motif	chr6	506350	507097	IRF4	-1.90476	2.53248e-05	intron (NM_018303, intron 23 of 27)	114972	gene_body	-1.96215	1.03297e-08	1.96215	concordant_down	4	0.329662	1	yes	gene_down	TF_not_significant	coherent_activation_loss	active_enhancer	0	1	0	1	1	0	0	0	2	2	1	9	yes	2	EH38D5722041	EH38E3685122	dELS	dELS	EH38E3685122;EH38E4392050
peak_0064195	JUN	Closing	EWS:ERG-fusion	EWS;ERG-FUSION;JUN;FOS;JUNB;FOSL1;FOSL2	known79.motif	chr6	506350	507097	IRF4	-1.90476	2.53248e-05	intron (NM_018303, intron 23 of 27)	114972	gene_body	-1.96215	1.03297e-08	1.96215	concordant_down	4	0.329662	1	yes	gene_down	TF_not_significant	coherent_activation_loss	active_enhancer	0	1	0	1	1	0	0	0	2	2	1	9	yes	2	EH38D5722041	EH38E3685122	dELS	dELS	EH38E3685122;EH38E4392050
peak_0064195	KLF14	Closing	KLF14	KLF14	known55.motif	chr6	506350	507097	IRF4	-1.90476	2.53248e-05	intron (NM_018303, intron 23 of 27)	114972	gene_body	-1.96215	1.03297e-08	1.96215	concordant_down	4	0.424493	1	yes	gene_down	TF_not_significant	coherent_activation_loss	active_enhancer	0	1	0	1	1	0	0	0	2	2	1	9	yes	2	EH38D5722041	EH38E3685122	dELS	dELS	EH38E3685122;EH38E4392050
peak_0064195	KLF5	Closing	KLF5	KLF5	known134.motif	chr6	506350	507097	IRF4	-1.90476	2.53248e-05	intron (NM_018303, intron 23 of 27)	114972	gene_body	-1.96215	1.03297e-08	1.96215	concordant_down	4	0.394372	1	yes	gene_down	TF_not_significant	coherent_activation_loss	active_enhancer	0	1	0	1	1	0	0	0	2	2	1	9	yes	2	EH38D5722041	EH38E3685122	dELS	dELS	EH38E3685122;EH38E4392050
peak_0064195	MAZ	Closing	Maz	MAZ	known64.motif	chr6	506350	507097	IRF4	-1.90476	2.53248e-05	intron (NM_018303, intron 23 of 27)	114972	gene_body	-1.96215	1.03297e-08	1.96215	concordant_down	4	-0.0810828	1	yes	gene_down	TF_not_significant	coherent_activation_loss	active_enhancer	0	1	0	1	1	0	0	0	2	2	1	9	yes	2	EH38D5722041	EH38E3685122	dELS	dELS	EH38E3685122;EH38E4392050
peak_0064195	MEF2A	Closing	Mef2a	MEF2A	known65.motif	chr6	506350	507097	IRF4	-1.90476	2.53248e-05	intron (NM_018303, intron 23 of 27)	114972	gene_body	-1.96215	1.03297e-08	1.96215	concordant_down	4	-0.296281	0.0990156	yes	gene_down	TF_not_significant	coherent_activation_loss	active_enhancer	0	1	0	1	1	0	0	0	2	2	1	9	yes	2	EH38D5722041	EH38E3685122	dELS	dELS	EH38E3685122;EH38E4392050
peak_0064195	RELA	Closing	NFkB-p65-Rel	RELA;REL	known14.motif	chr6	506350	507097	IRF4	-1.90476	2.53248e-05	intron (NM_018303, intron 23 of 27)	114972	gene_body	-1.96215	1.03297e-08	1.96215	concordant_down	4	0.0602568	1	yes	gene_down	TF_not_significant	coherent_activation_loss	active_enhancer	0	1	0	1	1	0	0	0	2	2	1	9	yes	2	EH38D5722041	EH38E3685122	dELS	dELS	EH38E3685122;EH38E4392050
peak_0064195	RFX6	Closing	Rfx6	RFX6	known127.motif	chr6	506350	507097	IRF4	-1.90476	2.53248e-05	intron (NM_018303, intron 23 of 27)	114972	gene_body	-1.96215	1.03297e-08	1.96215	concordant_down	4	0.245026	1	yes	gene_down	TF_not_significant	coherent_activation_loss	active_enhancer	0	1	0	1	1	0	0	0	2	2	1	9	yes	2	EH38D5722041	EH38E3685122	dELS	dELS	EH38E3685122;EH38E4392050
peak_0064195	RUNX2	Closing	RUNX2	RUNX2	known34.motif	chr6	506350	507097	IRF4	-1.90476	2.53248e-05	intron (NM_018303, intron 23 of 27)	114972	gene_body	-1.96215	1.03297e-08	1.96215	concordant_down	4	-0.484095	1	yes	gene_down	TF_not_significant	coherent_activation_loss	active_enhancer	0	1	0	1	1	0	0	0	2	2	1	9	yes	2	EH38D5722041	EH38E3685122	dELS	dELS	EH38E3685122;EH38E4392050
peak_0064195	SPI1	Closing	PU.1	SPI1	known40.motif	chr6	506350	507097	IRF4	-1.90476	2.53248e-05	intron (NM_018303, intron 23 of 27)	114972	gene_body	-1.96215	1.03297e-08	1.96215	concordant_down	4	0.124323	1	yes	gene_down	TF_not_significant	coherent_activation_loss	active_enhancer	0	1	0	1	1	0	0	0	2	2	1	9	yes	2	EH38D5722041	EH38E3685122	dELS	dELS	EH38E3685122;EH38E4392050
peak_0064195	STAT4	Closing	STAT4	STAT4	known111.motif	chr6	506350	507097	IRF4	-1.90476	2.53248e-05	intron (NM_018303, intron 23 of 27)	114972	gene_body	-1.96215	1.03297e-08	1.96215	concordant_down	4	-1.35402	1	yes	gene_down	TF_not_significant	coherent_activation_loss	active_enhancer	0	1	0	1	1	0	0	0	2	2	1	9	yes	2	EH38D5722041	EH38E3685122	dELS	dELS	EH38E3685122;EH38E4392050
peak_0021141	ATOH1	Closing	Atoh1	ATOH1	known102.motif	chr13	46165524	46165897	LCP1	-1.11606	2.90915e-05	intron (NM_002298, intron 1 of 15)	16466	gene_body	-1.27599	0.00396583	1.27599	concordant_down	4	0	1	yes	gene_down	TF_not_significant	coherent_activation_loss	active_enhancer	0	1	0	1	1	0	0	0	2	2	1	9	yes	1	EH38D2650386	EH38E1673903	dELS	dELS	EH38E1673903
peak_0021141	BHLHA15	Closing	BHLHA15	BHLHA15	known92.motif	chr13	46165524	46165897	LCP1	-1.11606	2.90915e-05	intron (NM_002298, intron 1 of 15)	16466	gene_body	-1.27599	0.00396583	1.27599	concordant_down	4	-0.00604192	1	yes	gene_down	TF_not_significant	coherent_activation_loss	active_enhancer	0	1	0	1	1	0	0	0	2	2	1	9	yes	1	EH38D2650386	EH38E1673903	dELS	dELS	EH38E1673903
peak_0021141	MAFA	Closing	MafA	MAFA	known123.motif	chr13	46165524	46165897	LCP1	-1.11606	2.90915e-05	intron (NM_002298, intron 1 of 15)	16466	gene_body	-1.27599	0.00396583	1.27599	concordant_down	4	2.12167	0.391851	yes	gene_down	TF_not_significant	coherent_activation_loss	active_enhancer	0	1	0	1	1	0	0	0	2	2	1	9	yes	1	EH38D2650386	EH38E1673903	dELS	dELS	EH38E1673903
peak_0021141	MNT	Closing	MNT	MNT	known100.motif	chr13	46165524	46165897	LCP1	-1.11606	2.90915e-05	intron (NM_002298, intron 1 of 15)	16466	gene_body	-1.27599	0.00396583	1.27599	concordant_down	4	-0.067775	1	yes	gene_down	TF_not_significant	coherent_activation_loss	active_enhancer	0	1	0	1	1	0	0	0	2	2	1	9	yes	1	EH38D2650386	EH38E1673903	dELS	dELS	EH38E1673903
peak_0021141	PAX5	Closing	PAX5	PAX5	known135.motif	chr13	46165524	46165897	LCP1	-1.11606	2.90915e-05	intron (NM_002298, intron 1 of 15)	16466	gene_body	-1.27599	0.00396583	1.27599	concordant_down	4	-0.192664	1	yes	gene_down	TF_not_significant	coherent_activation_loss	active_enhancer	0	1	0	1	1	0	0	0	2	2	1	9	yes	1	EH38D2650386	EH38E1673903	dELS	dELS	EH38E1673903
peak_0021141	RELA	Closing	NFkB-p65-Rel	RELA;REL	known14.motif	chr13	46165524	46165897	LCP1	-1.11606	2.90915e-05	intron (NM_002298, intron 1 of 15)	16466	gene_body	-1.27599	0.00396583	1.27599	concordant_down	4	0.0602568	1	yes	gene_down	TF_not_significant	coherent_activation_loss	active_enhancer	0	1	0	1	1	0	0	0	2	2	1	9	yes	1	EH38D2650386	EH38E1673903	dELS	dELS	EH38E1673903
peak_0021141	TCF4	Closing	TCF4	TCF4	known128.motif	chr13	46165524	46165897	LCP1	-1.11606	2.90915e-05	intron (NM_002298, intron 1 of 15)	16466	gene_body	-1.27599	0.00396583	1.27599	concordant_down	4	-0.0799037	1	yes	gene_down	TF_not_significant	coherent_activation_loss	active_enhancer	0	1	0	1	1	0	0	0	2	2	1	9	yes	1	EH38D2650386	EH38E1673903	dELS	dELS	EH38E1673903
peak_0021143	ATOH1	Closing	Atoh1	ATOH1	known102.motif	chr13	46173687	46174038	LCP1	-1.55717	2.22578e-08	intron (NM_002298, intron 1 of 15)	8314	gene_body	-1.27599	0.00396583	1.27599	concordant_down	4	0	1	yes	gene_down	TF_not_significant	coherent_activation_loss	active_enhancer	0	1	1	1	1	0	0	1	2	2	1	9	yes	1	EH38D2650404	EH38E1673920	dELS	dELS	EH38E1673920
peak_0021143	CREB5	Closing	CREB5	CREB5	known49.motif	chr13	46173687	46174038	LCP1	-1.55717	2.22578e-08	intron (NM_002298, intron 1 of 15)	8314	gene_body	-1.27599	0.00396583	1.27599	concordant_down	4	-1.92657	1	yes	gene_down	TF_not_significant	coherent_activation_loss	active_enhancer	0	1	1	1	1	0	0	1	2	2	1	9	yes	1	EH38D2650404	EH38E1673920	dELS	dELS	EH38E1673920
peak_0021143	EHF	Closing	EHF	EHF	known75.motif	chr13	46173687	46174038	LCP1	-1.55717	2.22578e-08	intron (NM_002298, intron 1 of 15)	8314	gene_body	-1.27599	0.00396583	1.27599	concordant_down	4	1.70243	0.699136	yes	gene_down	TF_not_significant	coherent_activation_loss	active_enhancer	0	1	1	1	1	0	0	1	2	2	1	9	yes	1	EH38D2650404	EH38E1673920	dELS	dELS	EH38E1673920
peak_0021143	ELF3	Closing	ELF3	ELF3	known61.motif	chr13	46173687	46174038	LCP1	-1.55717	2.22578e-08	intron (NM_002298, intron 1 of 15)	8314	gene_body	-1.27599	0.00396583	1.27599	concordant_down	4	0.0741507	1	yes	gene_down	TF_not_significant	coherent_activation_loss	active_enhancer	0	1	1	1	1	0	0	1	2	2	1	9	yes	1	EH38D2650404	EH38E1673920	dELS	dELS	EH38E1673920
peak_0021143	ELF4	Closing	Elf4	ELF4	known66.motif	chr13	46173687	46174038	LCP1	-1.55717	2.22578e-08	intron (NM_002298, intron 1 of 15)	8314	gene_body	-1.27599	0.00396583	1.27599	concordant_down	4	0.216507	0.71809	yes	gene_down	TF_not_significant	coherent_activation_loss	active_enhancer	0	1	1	1	1	0	0	1	2	2	1	9	yes	1	EH38D2650404	EH38E1673920	dELS	dELS	EH38E1673920
peak_0021143	ELF5	Closing	ELF5	ELF5	known44.motif	chr13	46173687	46174038	LCP1	-1.55717	2.22578e-08	intron (NM_002298, intron 1 of 15)	8314	gene_body	-1.27599	0.00396583	1.27599	concordant_down	4	0	1	yes	gene_down	TF_not_significant	coherent_activation_loss	active_enhancer	0	1	1	1	1	0	0	1	2	2	1	9	yes	1	EH38D2650404	EH38E1673920	dELS	dELS	EH38E1673920
peak_0021143	ERG	Closing	ERG	ERG	known81.motif	chr13	46173687	46174038	LCP1	-1.55717	2.22578e-08	intron (NM_002298, intron 1 of 15)	8314	gene_body	-1.27599	0.00396583	1.27599	concordant_down	4	0.605698	1	yes	gene_down	TF_not_significant	coherent_activation_loss	active_enhancer	0	1	1	1	1	0	0	1	2	2	1	9	yes	1	EH38D2650404	EH38E1673920	dELS	dELS	EH38E1673920
peak_0021143	HOXA10	Closing	Hoxa10	HOXA10	known121.motif	chr13	46173687	46174038	LCP1	-1.55717	2.22578e-08	intron (NM_002298, intron 1 of 15)	8314	gene_body	-1.27599	0.00396583	1.27599	concordant_down	4	-0.836985	1	yes	gene_down	TF_not_significant	coherent_activation_loss	active_enhancer	0	1	1	1	1	0	0	1	2	2	1	9	yes	1	EH38D2650404	EH38E1673920	dELS	dELS	EH38E1673920
peak_0021143	MYB	Closing	MYB	MYB	known106.motif	chr13	46173687	46174038	LCP1	-1.55717	2.22578e-08	intron (NM_002298, intron 1 of 15)	8314	gene_body	-1.27599	0.00396583	1.27599	concordant_down	4	-0.131766	1	yes	gene_down	TF_not_significant	coherent_activation_loss	active_enhancer	0	1	1	1	1	0	0	1	2	2	1	9	yes	1	EH38D2650404	EH38E1673920	dELS	dELS	EH38E1673920
peak_0021143	NEUROG2	Closing	NeuroG2	NEUROG2	known116.motif	chr13	46173687	46174038	LCP1	-1.55717	2.22578e-08	intron (NM_002298, intron 1 of 15)	8314	gene_body	-1.27599	0.00396583	1.27599	concordant_down	4	-0.836985	1	yes	gene_down	TF_not_significant	coherent_activation_loss	active_enhancer	0	1	1	1	1	0	0	1	2	2	1	9	yes	1	EH38D2650404	EH38E1673920	dELS	dELS	EH38E1673920
peak_0021143	PRDM10	Closing	PRDM10	PRDM10	known117.motif	chr13	46173687	46174038	LCP1	-1.55717	2.22578e-08	intron (NM_002298, intron 1 of 15)	8314	gene_body	-1.27599	0.00396583	1.27599	concordant_down	4	0.292319	0.384812	yes	gene_down	TF_not_significant	coherent_activation_loss	active_enhancer	0	1	1	1	1	0	0	1	2	2	1	9	yes	1	EH38D2650404	EH38E1673920	dELS	dELS	EH38E1673920
peak_0021143	RUNX1	Closing	RUNX1	RUNX1	known27.motif	chr13	46173687	46174038	LCP1	-1.55717	2.22578e-08	intron (NM_002298, intron 1 of 15)	8314	gene_body	-1.27599	0.00396583	1.27599	concordant_down	4	-0.107419	1	yes	gene_down	TF_not_significant	coherent_activation_loss	active_enhancer	0	1	1	1	1	0	0	1	2	2	1	9	yes	1	EH38D2650404	EH38E1673920	dELS	dELS	EH38E1673920
peak_0021143	RUNX2	Closing	RUNX2	RUNX2	known34.motif	chr13	46173687	46174038	LCP1	-1.55717	2.22578e-08	intron (NM_002298, intron 1 of 15)	8314	gene_body	-1.27599	0.00396583	1.27599	concordant_down	4	-0.484095	1	yes	gene_down	TF_not_significant	coherent_activation_loss	active_enhancer	0	1	1	1	1	0	0	1	2	2	1	9	yes	1	EH38D2650404	EH38E1673920	dELS	dELS	EH38E1673920
peak_0021143	SPI1	Closing	PU.1	SPI1	known40.motif	chr13	46173687	46174038	LCP1	-1.55717	2.22578e-08	intron (NM_002298, intron 1 of 15)	8314	gene_body	-1.27599	0.00396583	1.27599	concordant_down	4	0.124323	1	yes	gene_down	TF_not_significant	coherent_activation_loss	active_enhancer	0	1	1	1	1	0	0	1	2	2	1	9	yes	1	EH38D2650404	EH38E1673920	dELS	dELS	EH38E1673920
peak_0021143	TCF4	Closing	TCF4	TCF4	known128.motif	chr13	46173687	46174038	LCP1	-1.55717	2.22578e-08	intron (NM_002298, intron 1 of 15)	8314	gene_body	-1.27599	0.00396583	1.27599	concordant_down	4	-0.0799037	1	yes	gene_down	TF_not_significant	coherent_activation_loss	active_enhancer	0	1	1	1	1	0	0	1	2	2	1	9	yes	1	EH38D2650404	EH38E1673920	dELS	dELS	EH38E1673920
peak_0074306	BATF	Closing	BATF	BATF	known3.motif	chr8	29750716	29751196	LINC02099	-1.25172	0.000100963	non-coding (NR_125816, exon 3 of 3)	2647	gene_body	-2.75993	0.00958422	2.75993	concordant_down	4	-0.596918	0.292535	yes	gene_down	TF_not_significant	coherent_activation_loss	active_enhancer	0	1	1	1	1	0	0	0	2	2	1	9	yes	2	EH38D5938589	EH38E3826325	dELS	dELS	EH38E3826325;EH38E3826326
peak_0074306	FOS	Closing	Fos	FOS	known5.motif	chr8	29750716	29751196	LINC02099	-1.25172	0.000100963	non-coding (NR_125816, exon 3 of 3)	2647	gene_body	-2.75993	0.00958422	2.75993	concordant_down	4	0.128665	1	yes	gene_down	TF_not_significant	coherent_activation_loss	active_enhancer	0	1	1	1	1	0	0	0	2	2	1	9	yes	2	EH38D5938589	EH38E3826325	dELS	dELS	EH38E3826325;EH38E3826326
peak_0074306	HLF	Closing	HLF	HLF	known39.motif	chr8	29750716	29751196	LINC02099	-1.25172	0.000100963	non-coding (NR_125816, exon 3 of 3)	2647	gene_body	-2.75993	0.00958422	2.75993	concordant_down	4	0.261211	1	yes	gene_down	TF_not_significant	coherent_activation_loss	active_enhancer	0	1	1	1	1	0	0	0	2	2	1	9	yes	2	EH38D5938589	EH38E3826325	dELS	dELS	EH38E3826325;EH38E3826326
peak_0074306	JUN	Closing	Jun-AP1	JUN	known12.motif	chr8	29750716	29751196	LINC02099	-1.25172	0.000100963	non-coding (NR_125816, exon 3 of 3)	2647	gene_body	-2.75993	0.00958422	2.75993	concordant_down	4	0.329662	1	yes	gene_down	TF_not_significant	coherent_activation_loss	active_enhancer	0	1	1	1	1	0	0	0	2	2	1	9	yes	2	EH38D5938589	EH38E3826325	dELS	dELS	EH38E3826325;EH38E3826326
peak_0074306	JUN	Closing	AP-1	JUN;FOS;JUNB;JUND;FOSL1;FOSL2;ATF3;BATF	known7.motif	chr8	29750716	29751196	LINC02099	-1.25172	0.000100963	non-coding (NR_125816, exon 3 of 3)	2647	gene_body	-2.75993	0.00958422	2.75993	concordant_down	4	0.329662	1	yes	gene_down	TF_not_significant	coherent_activation_loss	active_enhancer	0	1	1	1	1	0	0	0	2	2	1	9	yes	2	EH38D5938589	EH38E3826325	dELS	dELS	EH38E3826325;EH38E3826326
peak_0074306	JUNB	Closing	JunB	JUNB	known6.motif	chr8	29750716	29751196	LINC02099	-1.25172	0.000100963	non-coding (NR_125816, exon 3 of 3)	2647	gene_body	-2.75993	0.00958422	2.75993	concordant_down	4	0.338285	1	yes	gene_down	TF_not_significant	coherent_activation_loss	active_enhancer	0	1	1	1	1	0	0	0	2	2	1	9	yes	2	EH38D5938589	EH38E3826325	dELS	dELS	EH38E3826325;EH38E3826326
peak_0074306	MEF2B	Closing	Mef2b	MEF2B	known63.motif	chr8	29750716	29751196	LINC02099	-1.25172	0.000100963	non-coding (NR_125816, exon 3 of 3)	2647	gene_body	-2.75993	0.00958422	2.75993	concordant_down	4	-0.867043	0.635595	yes	gene_down	TF_not_significant	coherent_activation_loss	active_enhancer	0	1	1	1	1	0	0	0	2	2	1	9	yes	2	EH38D5938589	EH38E3826325	dELS	dELS	EH38E3826325;EH38E3826326
peak_0074306	MITF	Closing	MITF	MITF	known41.motif	chr8	29750716	29751196	LINC02099	-1.25172	0.000100963	non-coding (NR_125816, exon 3 of 3)	2647	gene_body	-2.75993	0.00958422	2.75993	concordant_down	4	0	1	yes	gene_down	TF_not_significant	coherent_activation_loss	active_enhancer	0	1	1	1	1	0	0	0	2	2	1	9	yes	2	EH38D5938589	EH38E3826325	dELS	dELS	EH38E3826325;EH38E3826326
peak_0067044	ASCL2	Opening	Ascl2	ASCL2	known13.motif	chr6	106728572	106728964	LINC02526	1.09412	0.0297256	intron (NR_033557, intron 4 of 6)	33283	gene_body	4.73724	0.00170441	4.73724	concordant_up	4	0.302007	1	yes	gene_up	TF_not_significant	coherent_activation_gain	active_enhancer	0	1	0	1	1	0	0	0	2	2	1	9	yes	2	EH38D3882043	EH38E2490956	dELS	dELS	EH38E2490956;EH38E3724525
peak_0067044	EOMES	Opening	Eomes	EOMES	known21.motif	chr6	106728572	106728964	LINC02526	1.09412	0.0297256	intron (NR_033557, intron 4 of 6)	33283	gene_body	4.73724	0.00170441	4.73724	concordant_up	4	0	1	yes	gene_up	TF_not_significant	coherent_activation_gain	active_enhancer	0	1	0	1	1	0	0	0	2	2	1	9	yes	2	EH38D3882043	EH38E2490956	dELS	dELS	EH38E2490956;EH38E3724525
peak_0067044	POU2F2	Opening	Oct2	POU2F2	known2.motif	chr6	106728572	106728964	LINC02526	1.09412	0.0297256	intron (NR_033557, intron 4 of 6)	33283	gene_body	4.73724	0.00170441	4.73724	concordant_up	4	-0.371429	0.104995	yes	gene_up	TF_not_significant	coherent_activation_gain	active_enhancer	0	1	0	1	1	0	0	0	2	2	1	9	yes	2	EH38D3882043	EH38E2490956	dELS	dELS	EH38E2490956;EH38E3724525
peak_0067044	POU2F3	Opening	Oct11	POU2F3	known5.motif	chr6	106728572	106728964	LINC02526	1.09412	0.0297256	intron (NR_033557, intron 4 of 6)	33283	gene_body	4.73724	0.00170441	4.73724	concordant_up	4	-1.36363	1	yes	gene_up	TF_not_significant	coherent_activation_gain	active_enhancer	0	1	0	1	1	0	0	0	2	2	1	9	yes	2	EH38D3882043	EH38E2490956	dELS	dELS	EH38E2490956;EH38E3724525
peak_0067044	SNAI1	Opening	Snail1	SNAI1	known12.motif	chr6	106728572	106728964	LINC02526	1.09412	0.0297256	intron (NR_033557, intron 4 of 6)	33283	gene_body	4.73724	0.00170441	4.73724	concordant_up	4	-0.628517	1	yes	gene_up	TF_not_significant	coherent_activation_gain	active_enhancer	0	1	0	1	1	0	0	0	2	2	1	9	yes	2	EH38D3882043	EH38E2490956	dELS	dELS	EH38E2490956;EH38E3724525
peak_0067044	SNAI2	Opening	Slug	SNAI2	known15.motif	chr6	106728572	106728964	LINC02526	1.09412	0.0297256	intron (NR_033557, intron 4 of 6)	33283	gene_body	4.73724	0.00170441	4.73724	concordant_up	4	0	1	yes	gene_up	TF_not_significant	coherent_activation_gain	active_enhancer	0	1	0	1	1	0	0	0	2	2	1	9	yes	2	EH38D3882043	EH38E2490956	dELS	dELS	EH38E2490956;EH38E3724525
peak_0067044	TCF12	Opening	HEB	TCF12	known4.motif	chr6	106728572	106728964	LINC02526	1.09412	0.0297256	intron (NR_033557, intron 4 of 6)	33283	gene_body	4.73724	0.00170441	4.73724	concordant_up	4	-0.264223	0.326118	yes	gene_up	TF_not_significant	coherent_activation_gain	active_enhancer	0	1	0	1	1	0	0	0	2	2	1	9	yes	2	EH38D3882043	EH38E2490956	dELS	dELS	EH38E2490956;EH38E3724525
peak_0067044	TCF3	Opening	E2A	TCF3	known10.motif	chr6	106728572	106728964	LINC02526	1.09412	0.0297256	intron (NR_033557, intron 4 of 6)	33283	gene_body	4.73724	0.00170441	4.73724	concordant_up	4	0.218273	1	yes	gene_up	TF_not_significant	coherent_activation_gain	active_enhancer	0	1	0	1	1	0	0	0	2	2	1	9	yes	2	EH38D3882043	EH38E2490956	dELS	dELS	EH38E2490956;EH38E3724525
peak_0067044	TCF3	Opening	E2A	TCF3	known11.motif	chr6	106728572	106728964	LINC02526	1.09412	0.0297256	intron (NR_033557, intron 4 of 6)	33283	gene_body	4.73724	0.00170441	4.73724	concordant_up	4	0.218273	1	yes	gene_up	TF_not_significant	coherent_activation_gain	active_enhancer	0	1	0	1	1	0	0	0	2	2	1	9	yes	2	EH38D3882043	EH38E2490956	dELS	dELS	EH38E2490956;EH38E3724525
peak_0048603	MAFA	Closing	MafA	MAFA	known123.motif	chr21	25563470	25563779	MIR155HG	-1.03189	0.00150103	intron (NR_001458, intron 1 of 2)	1480	gene_body	-3.05091	2.29125e-09	3.05091	concordant_down	4	2.12167	0.391851	yes	gene_down	TF_not_significant	coherent_activation_loss	active_enhancer	0	1	1	1	1	0	0	1	2	2	1	9	yes	1	EH38D5360483	EH38E3452786	pELS	pELS	EH38E3452786
peak_0048603	POU3F3	Closing	Brn1	POU3F3	known19.motif	chr21	25563470	25563779	MIR155HG	-1.03189	0.00150103	intron (NR_001458, intron 1 of 2)	1480	gene_body	-3.05091	2.29125e-09	3.05091	concordant_down	4	1.01905	1	yes	gene_down	TF_not_significant	coherent_activation_loss	active_enhancer	0	1	1	1	1	0	0	1	2	2	1	9	yes	1	EH38D5360483	EH38E3452786	pELS	pELS	EH38E3452786
peak_0048603	RUNX1	Closing	RUNX1	RUNX1	known27.motif	chr21	25563470	25563779	MIR155HG	-1.03189	0.00150103	intron (NR_001458, intron 1 of 2)	1480	gene_body	-3.05091	2.29125e-09	3.05091	concordant_down	4	-0.107419	1	yes	gene_down	TF_not_significant	coherent_activation_loss	active_enhancer	0	1	1	1	1	0	0	1	2	2	1	9	yes	1	EH38D5360483	EH38E3452786	pELS	pELS	EH38E3452786
peak_0048603	RUNX2	Closing	RUNX2	RUNX2	known34.motif	chr21	25563470	25563779	MIR155HG	-1.03189	0.00150103	intron (NR_001458, intron 1 of 2)	1480	gene_body	-3.05091	2.29125e-09	3.05091	concordant_down	4	-0.484095	1	yes	gene_down	TF_not_significant	coherent_activation_loss	active_enhancer	0	1	1	1	1	0	0	1	2	2	1	9	yes	1	EH38D5360483	EH38E3452786	pELS	pELS	EH38E3452786
peak_0048603	STAT4	Closing	STAT4	STAT4	known111.motif	chr21	25563470	25563779	MIR155HG	-1.03189	0.00150103	intron (NR_001458, intron 1 of 2)	1480	gene_body	-3.05091	2.29125e-09	3.05091	concordant_down	4	-1.35402	1	yes	gene_down	TF_not_significant	coherent_activation_loss	active_enhancer	0	1	1	1	1	0	0	1	2	2	1	9	yes	1	EH38D5360483	EH38E3452786	pELS	pELS	EH38E3452786
peak_0034243	ASCL1	Opening	Ascl1	ASCL1	known1.motif	chr18	8755425	8755957	MTCL1	1.01289	0.000958946	intron (NM_015210, intron 4 of 16)	38310	gene_body	1.58637	0.0270773	1.58637	concordant_up	4	0	1	yes	gene_up	TF_not_significant	coherent_activation_gain	active_enhancer	0	1	0	1	1	0	1	0	2	2	1	9	yes	2	EH38D5058221	EH38E3255960	dELS	dELS	EH38E3255960;EH38E3255961
peak_0034243	ASCL2	Opening	Ascl2	ASCL2	known13.motif	chr18	8755425	8755957	MTCL1	1.01289	0.000958946	intron (NM_015210, intron 4 of 16)	38310	gene_body	1.58637	0.0270773	1.58637	concordant_up	4	0.302007	1	yes	gene_up	TF_not_significant	coherent_activation_gain	active_enhancer	0	1	0	1	1	0	1	0	2	2	1	9	yes	2	EH38D5058221	EH38E3255960	dELS	dELS	EH38E3255960;EH38E3255961
peak_0034243	TCF12	Opening	HEB	TCF12	known4.motif	chr18	8755425	8755957	MTCL1	1.01289	0.000958946	intron (NM_015210, intron 4 of 16)	38310	gene_body	1.58637	0.0270773	1.58637	concordant_up	4	-0.264223	0.326118	yes	gene_up	TF_not_significant	coherent_activation_gain	active_enhancer	0	1	0	1	1	0	1	0	2	2	1	9	yes	2	EH38D5058221	EH38E3255960	dELS	dELS	EH38E3255960;EH38E3255961
peak_0034243	TCF3	Opening	E2A	TCF3	known10.motif	chr18	8755425	8755957	MTCL1	1.01289	0.000958946	intron (NM_015210, intron 4 of 16)	38310	gene_body	1.58637	0.0270773	1.58637	concordant_up	4	0.218273	1	yes	gene_up	TF_not_significant	coherent_activation_gain	active_enhancer	0	1	0	1	1	0	1	0	2	2	1	9	yes	2	EH38D5058221	EH38E3255960	dELS	dELS	EH38E3255960;EH38E3255961
peak_0032327	ATF4	Closing	Atf4	ATF4	known22.motif	chr17	48055404	48056318	NFE2L1	-1.41719	9.62542e-08	intron (NM_001330261, intron 2 of 5)	7502	gene_body	-1.64594	7.35948e-07	1.64594	concordant_down	4	-0.409799	0.158993	yes	gene_down	TF_not_significant	coherent_activation_loss	active_enhancer	0	1	1	1	1	0	0	1	2	2	1	9	yes	4	EH38D5018925	EH38E3228125	pELS	pELS	EH38E3228125;EH38E3228126;EH38E3228127;EH38E3228128
peak_0032327	ATOH1	Closing	Atoh1	ATOH1	known102.motif	chr17	48055404	48056318	NFE2L1	-1.41719	9.62542e-08	intron (NM_001330261, intron 2 of 5)	7502	gene_body	-1.64594	7.35948e-07	1.64594	concordant_down	4	0	1	yes	gene_down	TF_not_significant	coherent_activation_loss	active_enhancer	0	1	1	1	1	0	0	1	2	2	1	9	yes	4	EH38D5018925	EH38E3228125	pELS	pELS	EH38E3228125;EH38E3228126;EH38E3228127;EH38E3228128
peak_0032327	BHLHA15	Closing	BHLHA15	BHLHA15	known92.motif	chr17	48055404	48056318	NFE2L1	-1.41719	9.62542e-08	intron (NM_001330261, intron 2 of 5)	7502	gene_body	-1.64594	7.35948e-07	1.64594	concordant_down	4	-0.00604192	1	yes	gene_down	TF_not_significant	coherent_activation_loss	active_enhancer	0	1	1	1	1	0	0	1	2	2	1	9	yes	4	EH38D5018925	EH38E3228125	pELS	pELS	EH38E3228125;EH38E3228126;EH38E3228127;EH38E3228128
peak_0032327	EBF2	Closing	EBF2	EBF2	known105.motif	chr17	48055404	48056318	NFE2L1	-1.41719	9.62542e-08	intron (NM_001330261, intron 2 of 5)	7502	gene_body	-1.64594	7.35948e-07	1.64594	concordant_down	4	0	1	yes	gene_down	TF_not_significant	coherent_activation_loss	active_enhancer	0	1	1	1	1	0	0	1	2	2	1	9	yes	4	EH38D5018925	EH38E3228125	pELS	pELS	EH38E3228125;EH38E3228126;EH38E3228127;EH38E3228128
peak_0032327	EGR1	Closing	Egr1	EGR1	known15.motif	chr17	48055404	48056318	NFE2L1	-1.41719	9.62542e-08	intron (NM_001330261, intron 2 of 5)	7502	gene_body	-1.64594	7.35948e-07	1.64594	concordant_down	4	-1.49241	0.648521	yes	gene_down	TF_not_significant	coherent_activation_loss	active_enhancer	0	1	1	1	1	0	0	1	2	2	1	9	yes	4	EH38D5018925	EH38E3228125	pELS	pELS	EH38E3228125;EH38E3228126;EH38E3228127;EH38E3228128
peak_0032327	GFI1B	Closing	Gfi1b	GFI1B	known130.motif	chr17	48055404	48056318	NFE2L1	-1.41719	9.62542e-08	intron (NM_001330261, intron 2 of 5)	7502	gene_body	-1.64594	7.35948e-07	1.64594	concordant_down	4	0.0233349	1	yes	gene_down	TF_not_significant	coherent_activation_loss	active_enhancer	0	1	1	1	1	0	0	1	2	2	1	9	yes	4	EH38D5018925	EH38E3228125	pELS	pELS	EH38E3228125;EH38E3228126;EH38E3228127;EH38E3228128
peak_0032327	GLIS3	Closing	GLIS3	GLIS3	known110.motif	chr17	48055404	48056318	NFE2L1	-1.41719	9.62542e-08	intron (NM_001330261, intron 2 of 5)	7502	gene_body	-1.64594	7.35948e-07	1.64594	concordant_down	4	0	1	yes	gene_down	TF_not_significant	coherent_activation_loss	active_enhancer	0	1	1	1	1	0	0	1	2	2	1	9	yes	4	EH38D5018925	EH38E3228125	pELS	pELS	EH38E3228125;EH38E3228126;EH38E3228127;EH38E3228128
peak_0032327	HLF	Closing	HLF	HLF	known39.motif	chr17	48055404	48056318	NFE2L1	-1.41719	9.62542e-08	intron (NM_001330261, intron 2 of 5)	7502	gene_body	-1.64594	7.35948e-07	1.64594	concordant_down	4	0.261211	1	yes	gene_down	TF_not_significant	coherent_activation_loss	active_enhancer	0	1	1	1	1	0	0	1	2	2	1	9	yes	4	EH38D5018925	EH38E3228125	pELS	pELS	EH38E3228125;EH38E3228126;EH38E3228127;EH38E3228128
peak_0032327	KLF14	Closing	KLF14	KLF14	known55.motif	chr17	48055404	48056318	NFE2L1	-1.41719	9.62542e-08	intron (NM_001330261, intron 2 of 5)	7502	gene_body	-1.64594	7.35948e-07	1.64594	concordant_down	4	0.424493	1	yes	gene_down	TF_not_significant	coherent_activation_loss	active_enhancer	0	1	1	1	1	0	0	1	2	2	1	9	yes	4	EH38D5018925	EH38E3228125	pELS	pELS	EH38E3228125;EH38E3228126;EH38E3228127;EH38E3228128
peak_0032327	KLF5	Closing	KLF5	KLF5	known134.motif	chr17	48055404	48056318	NFE2L1	-1.41719	9.62542e-08	intron (NM_001330261, intron 2 of 5)	7502	gene_body	-1.64594	7.35948e-07	1.64594	concordant_down	4	0.394372	1	yes	gene_down	TF_not_significant	coherent_activation_loss	active_enhancer	0	1	1	1	1	0	0	1	2	2	1	9	yes	4	EH38D5018925	EH38E3228125	pELS	pELS	EH38E3228125;EH38E3228126;EH38E3228127;EH38E3228128
peak_0032327	MAZ	Closing	Maz	MAZ	known64.motif	chr17	48055404	48056318	NFE2L1	-1.41719	9.62542e-08	intron (NM_001330261, intron 2 of 5)	7502	gene_body	-1.64594	7.35948e-07	1.64594	concordant_down	4	-0.0810828	1	yes	gene_down	TF_not_significant	coherent_activation_loss	active_enhancer	0	1	1	1	1	0	0	1	2	2	1	9	yes	4	EH38D5018925	EH38E3228125	pELS	pELS	EH38E3228125;EH38E3228126;EH38E3228127;EH38E3228128
peak_0032327	MITF	Closing	MITF	MITF	known41.motif	chr17	48055404	48056318	NFE2L1	-1.41719	9.62542e-08	intron (NM_001330261, intron 2 of 5)	7502	gene_body	-1.64594	7.35948e-07	1.64594	concordant_down	4	0	1	yes	gene_down	TF_not_significant	coherent_activation_loss	active_enhancer	0	1	1	1	1	0	0	1	2	2	1	9	yes	4	EH38D5018925	EH38E3228125	pELS	pELS	EH38E3228125;EH38E3228126;EH38E3228127;EH38E3228128
peak_0032327	MYB	Closing	MYB	MYB	known106.motif	chr17	48055404	48056318	NFE2L1	-1.41719	9.62542e-08	intron (NM_001330261, intron 2 of 5)	7502	gene_body	-1.64594	7.35948e-07	1.64594	concordant_down	4	-0.131766	1	yes	gene_down	TF_not_significant	coherent_activation_loss	active_enhancer	0	1	1	1	1	0	0	1	2	2	1	9	yes	4	EH38D5018925	EH38E3228125	pELS	pELS	EH38E3228125;EH38E3228126;EH38E3228127;EH38E3228128
peak_0032327	NEUROG2	Closing	NeuroG2	NEUROG2	known116.motif	chr17	48055404	48056318	NFE2L1	-1.41719	9.62542e-08	intron (NM_001330261, intron 2 of 5)	7502	gene_body	-1.64594	7.35948e-07	1.64594	concordant_down	4	-0.836985	1	yes	gene_down	TF_not_significant	coherent_activation_loss	active_enhancer	0	1	1	1	1	0	0	1	2	2	1	9	yes	4	EH38D5018925	EH38E3228125	pELS	pELS	EH38E3228125;EH38E3228126;EH38E3228127;EH38E3228128
peak_0032327	POU2F2	Closing	Oct2	POU2F2	known21.motif	chr17	48055404	48056318	NFE2L1	-1.41719	9.62542e-08	intron (NM_001330261, intron 2 of 5)	7502	gene_body	-1.64594	7.35948e-07	1.64594	concordant_down	4	-0.371429	0.104995	yes	gene_down	TF_not_significant	coherent_activation_loss	active_enhancer	0	1	1	1	1	0	0	1	2	2	1	9	yes	4	EH38D5018925	EH38E3228125	pELS	pELS	EH38E3228125;EH38E3228126;EH38E3228127;EH38E3228128
peak_0032327	POU2F3	Closing	Oct11	POU2F3	known25.motif	chr17	48055404	48056318	NFE2L1	-1.41719	9.62542e-08	intron (NM_001330261, intron 2 of 5)	7502	gene_body	-1.64594	7.35948e-07	1.64594	concordant_down	4	-1.36363	1	yes	gene_down	TF_not_significant	coherent_activation_loss	active_enhancer	0	1	1	1	1	0	0	1	2	2	1	9	yes	4	EH38D5018925	EH38E3228125	pELS	pELS	EH38E3228125;EH38E3228126;EH38E3228127;EH38E3228128
peak_0032327	POU3F3	Closing	Brn1	POU3F3	known19.motif	chr17	48055404	48056318	NFE2L1	-1.41719	9.62542e-08	intron (NM_001330261, intron 2 of 5)	7502	gene_body	-1.64594	7.35948e-07	1.64594	concordant_down	4	1.01905	1	yes	gene_down	TF_not_significant	coherent_activation_loss	active_enhancer	0	1	1	1	1	0	0	1	2	2	1	9	yes	4	EH38D5018925	EH38E3228125	pELS	pELS	EH38E3228125;EH38E3228126;EH38E3228127;EH38E3228128
peak_0032327	POU5F1	Closing	Oct4	POU5F1	known20.motif	chr17	48055404	48056318	NFE2L1	-1.41719	9.62542e-08	intron (NM_001330261, intron 2 of 5)	7502	gene_body	-1.64594	7.35948e-07	1.64594	concordant_down	4	0.714636	1	yes	gene_down	TF_not_significant	coherent_activation_loss	active_enhancer	0	1	1	1	1	0	0	1	2	2	1	9	yes	4	EH38D5018925	EH38E3228125	pELS	pELS	EH38E3228125;EH38E3228126;EH38E3228127;EH38E3228128
peak_0032327	RFX6	Closing	Rfx6	RFX6	known127.motif	chr17	48055404	48056318	NFE2L1	-1.41719	9.62542e-08	intron (NM_001330261, intron 2 of 5)	7502	gene_body	-1.64594	7.35948e-07	1.64594	concordant_down	4	0.245026	1	yes	gene_down	TF_not_significant	coherent_activation_loss	active_enhancer	0	1	1	1	1	0	0	1	2	2	1	9	yes	4	EH38D5018925	EH38E3228125	pELS	pELS	EH38E3228125;EH38E3228126;EH38E3228127;EH38E3228128
peak_0032327	TCF12	Closing	Tcf12	TCF12	known76.motif	chr17	48055404	48056318	NFE2L1	-1.41719	9.62542e-08	intron (NM_001330261, intron 2 of 5)	7502	gene_body	-1.64594	7.35948e-07	1.64594	concordant_down	4	-0.264223	0.326118	yes	gene_down	TF_not_significant	coherent_activation_loss	active_enhancer	0	1	1	1	1	0	0	1	2	2	1	9	yes	4	EH38D5018925	EH38E3228125	pELS	pELS	EH38E3228125;EH38E3228126;EH38E3228127;EH38E3228128
peak_0032327	TCF4	Closing	TCF4	TCF4	known128.motif	chr17	48055404	48056318	NFE2L1	-1.41719	9.62542e-08	intron (NM_001330261, intron 2 of 5)	7502	gene_body	-1.64594	7.35948e-07	1.64594	concordant_down	4	-0.0799037	1	yes	gene_down	TF_not_significant	coherent_activation_loss	active_enhancer	0	1	1	1	1	0	0	1	2	2	1	9	yes	4	EH38D5018925	EH38E3228125	pELS	pELS	EH38E3228125;EH38E3228126;EH38E3228127;EH38E3228128
peak_0002113	ATF3	Closing	Atf3	ATF3	known9.motif	chr1	39666794	39667261	NT5C1A	-1.69977	0.000776616	intron (NM_032526, intron 1 of 5)	5010	gene_body	-5.44731	0.00932939	5.44731	concordant_down	4	-3.92028	0.000169874	yes	gene_down	TF_down	coherent_activation_loss	primed_enhancer	0	1	0	0	1	1	0	0	1	2	2	9	yes	2	EH38D4371652	EH38E2804935	dELS	dELS	EH38E2804935;EH38E3962435
peak_0002113	FOSL1	Closing	Fra1	FOSL1	known4.motif	chr1	39666794	39667261	NT5C1A	-1.69977	0.000776616	intron (NM_032526, intron 1 of 5)	5010	gene_body	-5.44731	0.00932939	5.44731	concordant_down	4	-2.84522	0.0038438	yes	gene_down	TF_down	coherent_activation_loss	primed_enhancer	0	1	0	0	1	1	0	0	1	2	2	9	yes	2	EH38D4371652	EH38E2804935	dELS	dELS	EH38E2804935;EH38E3962435
peak_0002113	FOSL2	Closing	Fra2	FOSL2	known11.motif	chr1	39666794	39667261	NT5C1A	-1.69977	0.000776616	intron (NM_032526, intron 1 of 5)	5010	gene_body	-5.44731	0.00932939	5.44731	concordant_down	4	-2.94385	0.00157751	yes	gene_down	TF_down	coherent_activation_loss	primed_enhancer	0	1	0	0	1	1	0	0	1	2	2	9	yes	2	EH38D4371652	EH38E2804935	dELS	dELS	EH38E2804935;EH38E3962435
peak_0002113	FOSL2	Closing	Fosl2	FOSL2	known8.motif	chr1	39666794	39667261	NT5C1A	-1.69977	0.000776616	intron (NM_032526, intron 1 of 5)	5010	gene_body	-5.44731	0.00932939	5.44731	concordant_down	4	-2.94385	0.00157751	yes	gene_down	TF_down	coherent_activation_loss	primed_enhancer	0	1	0	0	1	1	0	0	1	2	2	9	yes	2	EH38D4371652	EH38E2804935	dELS	dELS	EH38E2804935;EH38E3962435
peak_0002113	NFATC1	Closing	NFAT	NFATC1;NFATC2;NFATC3;NFATC4	known2.motif	chr1	39666794	39667261	NT5C1A	-1.69977	0.000776616	intron (NM_032526, intron 1 of 5)	5010	gene_body	-5.44731	0.00932939	5.44731	concordant_down	4	-0.764829	0.0475296	yes	gene_down	TF_down	coherent_activation_loss	primed_enhancer	0	1	0	0	1	1	0	0	1	2	2	9	yes	2	EH38D4371652	EH38E2804935	dELS	dELS	EH38E2804935;EH38E3962435
peak_0002113	NFKB1	Closing	NFkB-p65	NFKB1;RELA;RELB;NFKB2;REL	known10.motif	chr1	39666794	39667261	NT5C1A	-1.69977	0.000776616	intron (NM_032526, intron 1 of 5)	5010	gene_body	-5.44731	0.00932939	5.44731	concordant_down	4	-1.24321	1.12356e-09	yes	gene_down	TF_down	coherent_activation_loss	primed_enhancer	0	1	0	0	1	1	0	0	1	2	2	9	yes	2	EH38D4371652	EH38E2804935	dELS	dELS	EH38E2804935;EH38E3962435
peak_0004116	CLOCK	Closing	CLOCK	CLOCK	known90.motif	chr1	113751591	113751871	PHTF1	-1.79283	2.3012e-05	intron (NM_001323051, intron 2 of 12)	7424	gene_body	-1.02238	4.13183e-05	1.02238	concordant_down	4	-0.162156	1	yes	gene_down	TF_not_significant	coherent_activation_loss	active_enhancer	0	1	0	1	1	0	0	0	2	2	1	9	no	0	.	.	none	.	.
peak_0004116	MEF2A	Closing	Mef2a	MEF2A	known65.motif	chr1	113751591	113751871	PHTF1	-1.79283	2.3012e-05	intron (NM_001323051, intron 2 of 12)	7424	gene_body	-1.02238	4.13183e-05	1.02238	concordant_down	4	-0.296281	0.0990156	yes	gene_down	TF_not_significant	coherent_activation_loss	active_enhancer	0	1	0	1	1	0	0	0	2	2	1	9	no	0	.	.	none	.	.
peak_0004116	MEF2B	Closing	Mef2b	MEF2B	known63.motif	chr1	113751591	113751871	PHTF1	-1.79283	2.3012e-05	intron (NM_001323051, intron 2 of 12)	7424	gene_body	-1.02238	4.13183e-05	1.02238	concordant_down	4	-0.867043	0.635595	yes	gene_down	TF_not_significant	coherent_activation_loss	active_enhancer	0	1	0	1	1	0	0	0	2	2	1	9	no	0	.	.	none	.	.
peak_0004116	MITF	Closing	MITF	MITF	known41.motif	chr1	113751591	113751871	PHTF1	-1.79283	2.3012e-05	intron (NM_001323051, intron 2 of 12)	7424	gene_body	-1.02238	4.13183e-05	1.02238	concordant_down	4	0	1	yes	gene_down	TF_not_significant	coherent_activation_loss	active_enhancer	0	1	0	1	1	0	0	0	2	2	1	9	no	0	.	.	none	.	.
peak_0004116	MNT	Closing	MNT	MNT	known100.motif	chr1	113751591	113751871	PHTF1	-1.79283	2.3012e-05	intron (NM_001323051, intron 2 of 12)	7424	gene_body	-1.02238	4.13183e-05	1.02238	concordant_down	4	-0.067775	1	yes	gene_down	TF_not_significant	coherent_activation_loss	active_enhancer	0	1	0	1	1	0	0	0	2	2	1	9	no	0	.	.	none	.	.
peak_0004116	POU2F2	Closing	Oct2	POU2F2	known21.motif	chr1	113751591	113751871	PHTF1	-1.79283	2.3012e-05	intron (NM_001323051, intron 2 of 12)	7424	gene_body	-1.02238	4.13183e-05	1.02238	concordant_down	4	-0.371429	0.104995	yes	gene_down	TF_not_significant	coherent_activation_loss	active_enhancer	0	1	0	1	1	0	0	0	2	2	1	9	no	0	.	.	none	.	.
peak_0004116	POU2F3	Closing	Oct11	POU2F3	known25.motif	chr1	113751591	113751871	PHTF1	-1.79283	2.3012e-05	intron (NM_001323051, intron 2 of 12)	7424	gene_body	-1.02238	4.13183e-05	1.02238	concordant_down	4	-1.36363	1	yes	gene_down	TF_not_significant	coherent_activation_loss	active_enhancer	0	1	0	1	1	0	0	0	2	2	1	9	no	0	.	.	none	.	.
peak_0004116	POU3F3	Closing	Brn1	POU3F3	known19.motif	chr1	113751591	113751871	PHTF1	-1.79283	2.3012e-05	intron (NM_001323051, intron 2 of 12)	7424	gene_body	-1.02238	4.13183e-05	1.02238	concordant_down	4	1.01905	1	yes	gene_down	TF_not_significant	coherent_activation_loss	active_enhancer	0	1	0	1	1	0	0	0	2	2	1	9	no	0	.	.	none	.	.
peak_0004116	POU5F1	Closing	Oct4	POU5F1	known20.motif	chr1	113751591	113751871	PHTF1	-1.79283	2.3012e-05	intron (NM_001323051, intron 2 of 12)	7424	gene_body	-1.02238	4.13183e-05	1.02238	concordant_down	4	0.714636	1	yes	gene_down	TF_not_significant	coherent_activation_loss	active_enhancer	0	1	0	1	1	0	0	0	2	2	1	9	no	0	.	.	none	.	.
peak_0004116	PRDM10	Closing	PRDM10	PRDM10	known117.motif	chr1	113751591	113751871	PHTF1	-1.79283	2.3012e-05	intron (NM_001323051, intron 2 of 12)	7424	gene_body	-1.02238	4.13183e-05	1.02238	concordant_down	4	0.292319	0.384812	yes	gene_down	TF_not_significant	coherent_activation_loss	active_enhancer	0	1	0	1	1	0	0	0	2	2	1	9	no	0	.	.	none	.	.
peak_0004116	RUNX1	Closing	RUNX1	RUNX1	known27.motif	chr1	113751591	113751871	PHTF1	-1.79283	2.3012e-05	intron (NM_001323051, intron 2 of 12)	7424	gene_body	-1.02238	4.13183e-05	1.02238	concordant_down	4	-0.107419	1	yes	gene_down	TF_not_significant	coherent_activation_loss	active_enhancer	0	1	0	1	1	0	0	0	2	2	1	9	no	0	.	.	none	.	.
peak_0004116	USF2	Closing	Usf2	USF2	known71.motif	chr1	113751591	113751871	PHTF1	-1.79283	2.3012e-05	intron (NM_001323051, intron 2 of 12)	7424	gene_body	-1.02238	4.13183e-05	1.02238	concordant_down	4	0.208644	0.323008	yes	gene_down	TF_not_significant	coherent_activation_loss	active_enhancer	0	1	0	1	1	0	0	0	2	2	1	9	no	0	.	.	none	.	.
peak_0004117	ASCL2	Closing	Ascl2	ASCL2	known104.motif	chr1	113753247	113753871	PHTF1	-1.08978	0.0117685	intron (NM_001323051, intron 2 of 12)	5596	gene_body	-1.02238	4.13183e-05	1.02238	concordant_down	4	0.302007	1	yes	gene_down	TF_not_significant	coherent_activation_loss	active_enhancer	0	1	1	1	1	0	0	0	2	2	1	9	yes	1	EH38D6161369	EH38E3976970	dELS	dELS	EH38E3976970
peak_0004117	ATF2	Closing	Atf2	ATF2	known58.motif	chr1	113753247	113753871	PHTF1	-1.08978	0.0117685	intron (NM_001323051, intron 2 of 12)	5596	gene_body	-1.02238	4.13183e-05	1.02238	concordant_down	4	-0.14068	0.757734	yes	gene_down	TF_not_significant	coherent_activation_loss	active_enhancer	0	1	1	1	1	0	0	0	2	2	1	9	yes	1	EH38D6161369	EH38E3976970	dELS	dELS	EH38E3976970
peak_0004117	ATF7	Closing	Atf7	ATF7	known43.motif	chr1	113753247	113753871	PHTF1	-1.08978	0.0117685	intron (NM_001323051, intron 2 of 12)	5596	gene_body	-1.02238	4.13183e-05	1.02238	concordant_down	4	0.0262107	1	yes	gene_down	TF_not_significant	coherent_activation_loss	active_enhancer	0	1	1	1	1	0	0	0	2	2	1	9	yes	1	EH38D6161369	EH38E3976970	dELS	dELS	EH38E3976970
peak_0004117	ATOH1	Closing	Atoh1	ATOH1	known102.motif	chr1	113753247	113753871	PHTF1	-1.08978	0.0117685	intron (NM_001323051, intron 2 of 12)	5596	gene_body	-1.02238	4.13183e-05	1.02238	concordant_down	4	0	1	yes	gene_down	TF_not_significant	coherent_activation_loss	active_enhancer	0	1	1	1	1	0	0	0	2	2	1	9	yes	1	EH38D6161369	EH38E3976970	dELS	dELS	EH38E3976970
peak_0004117	EGR1	Closing	Egr1	EGR1	known15.motif	chr1	113753247	113753871	PHTF1	-1.08978	0.0117685	intron (NM_001323051, intron 2 of 12)	5596	gene_body	-1.02238	4.13183e-05	1.02238	concordant_down	4	-1.49241	0.648521	yes	gene_down	TF_not_significant	coherent_activation_loss	active_enhancer	0	1	1	1	1	0	0	0	2	2	1	9	yes	1	EH38D6161369	EH38E3976970	dELS	dELS	EH38E3976970
peak_0004117	EHF	Closing	EHF	EHF	known75.motif	chr1	113753247	113753871	PHTF1	-1.08978	0.0117685	intron (NM_001323051, intron 2 of 12)	5596	gene_body	-1.02238	4.13183e-05	1.02238	concordant_down	4	1.70243	0.699136	yes	gene_down	TF_not_significant	coherent_activation_loss	active_enhancer	0	1	1	1	1	0	0	0	2	2	1	9	yes	1	EH38D6161369	EH38E3976970	dELS	dELS	EH38E3976970
peak_0004117	ELF3	Closing	ELF3	ELF3	known61.motif	chr1	113753247	113753871	PHTF1	-1.08978	0.0117685	intron (NM_001323051, intron 2 of 12)	5596	gene_body	-1.02238	4.13183e-05	1.02238	concordant_down	4	0.0741507	1	yes	gene_down	TF_not_significant	coherent_activation_loss	active_enhancer	0	1	1	1	1	0	0	0	2	2	1	9	yes	1	EH38D6161369	EH38E3976970	dELS	dELS	EH38E3976970
peak_0004117	ELF5	Closing	ELF5	ELF5	known44.motif	chr1	113753247	113753871	PHTF1	-1.08978	0.0117685	intron (NM_001323051, intron 2 of 12)	5596	gene_body	-1.02238	4.13183e-05	1.02238	concordant_down	4	0	1	yes	gene_down	TF_not_significant	coherent_activation_loss	active_enhancer	0	1	1	1	1	0	0	0	2	2	1	9	yes	1	EH38D6161369	EH38E3976970	dELS	dELS	EH38E3976970
peak_0004117	GFI1B	Closing	Gfi1b	GFI1B	known130.motif	chr1	113753247	113753871	PHTF1	-1.08978	0.0117685	intron (NM_001323051, intron 2 of 12)	5596	gene_body	-1.02238	4.13183e-05	1.02238	concordant_down	4	0.0233349	1	yes	gene_down	TF_not_significant	coherent_activation_loss	active_enhancer	0	1	1	1	1	0	0	0	2	2	1	9	yes	1	EH38D6161369	EH38E3976970	dELS	dELS	EH38E3976970
peak_0004117	GLIS3	Closing	GLIS3	GLIS3	known110.motif	chr1	113753247	113753871	PHTF1	-1.08978	0.0117685	intron (NM_001323051, intron 2 of 12)	5596	gene_body	-1.02238	4.13183e-05	1.02238	concordant_down	4	0	1	yes	gene_down	TF_not_significant	coherent_activation_loss	active_enhancer	0	1	1	1	1	0	0	0	2	2	1	9	yes	1	EH38D6161369	EH38E3976970	dELS	dELS	EH38E3976970
peak_0004117	JUN	Closing	EWS:ERG-fusion	EWS;ERG-FUSION;JUN;FOS;JUNB;FOSL1;FOSL2	known79.motif	chr1	113753247	113753871	PHTF1	-1.08978	0.0117685	intron (NM_001323051, intron 2 of 12)	5596	gene_body	-1.02238	4.13183e-05	1.02238	concordant_down	4	0.329662	1	yes	gene_down	TF_not_significant	coherent_activation_loss	active_enhancer	0	1	1	1	1	0	0	0	2	2	1	9	yes	1	EH38D6161369	EH38E3976970	dELS	dELS	EH38E3976970
peak_0004117	KLF14	Closing	KLF14	KLF14	known55.motif	chr1	113753247	113753871	PHTF1	-1.08978	0.0117685	intron (NM_001323051, intron 2 of 12)	5596	gene_body	-1.02238	4.13183e-05	1.02238	concordant_down	4	0.424493	1	yes	gene_down	TF_not_significant	coherent_activation_loss	active_enhancer	0	1	1	1	1	0	0	0	2	2	1	9	yes	1	EH38D6161369	EH38E3976970	dELS	dELS	EH38E3976970
peak_0004117	MEF2A	Closing	Mef2a	MEF2A	known65.motif	chr1	113753247	113753871	PHTF1	-1.08978	0.0117685	intron (NM_001323051, intron 2 of 12)	5596	gene_body	-1.02238	4.13183e-05	1.02238	concordant_down	4	-0.296281	0.0990156	yes	gene_down	TF_not_significant	coherent_activation_loss	active_enhancer	0	1	1	1	1	0	0	0	2	2	1	9	yes	1	EH38D6161369	EH38E3976970	dELS	dELS	EH38E3976970
peak_0004117	MEF2B	Closing	Mef2b	MEF2B	known63.motif	chr1	113753247	113753871	PHTF1	-1.08978	0.0117685	intron (NM_001323051, intron 2 of 12)	5596	gene_body	-1.02238	4.13183e-05	1.02238	concordant_down	4	-0.867043	0.635595	yes	gene_down	TF_not_significant	coherent_activation_loss	active_enhancer	0	1	1	1	1	0	0	0	2	2	1	9	yes	1	EH38D6161369	EH38E3976970	dELS	dELS	EH38E3976970
peak_0004117	MEF2C	Closing	Mef2c	MEF2C	known52.motif	chr1	113753247	113753871	PHTF1	-1.08978	0.0117685	intron (NM_001323051, intron 2 of 12)	5596	gene_body	-1.02238	4.13183e-05	1.02238	concordant_down	4	-0.251466	1	yes	gene_down	TF_not_significant	coherent_activation_loss	active_enhancer	0	1	1	1	1	0	0	0	2	2	1	9	yes	1	EH38D6161369	EH38E3976970	dELS	dELS	EH38E3976970
peak_0004117	MEF2D	Closing	Mef2d	MEF2D	known46.motif	chr1	113753247	113753871	PHTF1	-1.08978	0.0117685	intron (NM_001323051, intron 2 of 12)	5596	gene_body	-1.02238	4.13183e-05	1.02238	concordant_down	4	-0.0668923	1	yes	gene_down	TF_not_significant	coherent_activation_loss	active_enhancer	0	1	1	1	1	0	0	0	2	2	1	9	yes	1	EH38D6161369	EH38E3976970	dELS	dELS	EH38E3976970
peak_0004117	MYB	Closing	MYB	MYB	known106.motif	chr1	113753247	113753871	PHTF1	-1.08978	0.0117685	intron (NM_001323051, intron 2 of 12)	5596	gene_body	-1.02238	4.13183e-05	1.02238	concordant_down	4	-0.131766	1	yes	gene_down	TF_not_significant	coherent_activation_loss	active_enhancer	0	1	1	1	1	0	0	0	2	2	1	9	yes	1	EH38D6161369	EH38E3976970	dELS	dELS	EH38E3976970
peak_0004117	NEUROG2	Closing	NeuroG2	NEUROG2	known116.motif	chr1	113753247	113753871	PHTF1	-1.08978	0.0117685	intron (NM_001323051, intron 2 of 12)	5596	gene_body	-1.02238	4.13183e-05	1.02238	concordant_down	4	-0.836985	1	yes	gene_down	TF_not_significant	coherent_activation_loss	active_enhancer	0	1	1	1	1	0	0	0	2	2	1	9	yes	1	EH38D6161369	EH38E3976970	dELS	dELS	EH38E3976970
peak_0004117	TCF4	Closing	TCF4	TCF4	known128.motif	chr1	113753247	113753871	PHTF1	-1.08978	0.0117685	intron (NM_001323051, intron 2 of 12)	5596	gene_body	-1.02238	4.13183e-05	1.02238	concordant_down	4	-0.0799037	1	yes	gene_down	TF_not_significant	coherent_activation_loss	active_enhancer	0	1	1	1	1	0	0	0	2	2	1	9	yes	1	EH38D6161369	EH38E3976970	dELS	dELS	EH38E3976970
peak_0067734	ATOH1	Closing	Atoh1	ATOH1	known102.motif	chr6	134288543	134289064	SGK1	-1.78523	3.08622e-05	intron (NM_001143676, intron 1 of 13)	29254	gene_body	-3.29973	4.71684e-06	3.29973	concordant_down	4	0	1	yes	gene_down	TF_not_significant	coherent_activation_loss	active_enhancer	0	1	0	1	1	0	1	0	2	2	1	9	yes	2	EH38D3903176	EH38E2505025	dELS	dELS	EH38E2505025;EH38E2505026
peak_0067734	BATF	Closing	BATF	BATF	known3.motif	chr6	134288543	134289064	SGK1	-1.78523	3.08622e-05	intron (NM_001143676, intron 1 of 13)	29254	gene_body	-3.29973	4.71684e-06	3.29973	concordant_down	4	-0.596918	0.292535	yes	gene_down	TF_not_significant	coherent_activation_loss	active_enhancer	0	1	0	1	1	0	1	0	2	2	1	9	yes	2	EH38D3903176	EH38E2505025	dELS	dELS	EH38E2505025;EH38E2505026
peak_0067734	BHLHA15	Closing	BHLHA15	BHLHA15	known92.motif	chr6	134288543	134289064	SGK1	-1.78523	3.08622e-05	intron (NM_001143676, intron 1 of 13)	29254	gene_body	-3.29973	4.71684e-06	3.29973	concordant_down	4	-0.00604192	1	yes	gene_down	TF_not_significant	coherent_activation_loss	active_enhancer	0	1	0	1	1	0	1	0	2	2	1	9	yes	2	EH38D3903176	EH38E2505025	dELS	dELS	EH38E2505025;EH38E2505026
peak_0067734	EHF	Closing	EHF	EHF	known75.motif	chr6	134288543	134289064	SGK1	-1.78523	3.08622e-05	intron (NM_001143676, intron 1 of 13)	29254	gene_body	-3.29973	4.71684e-06	3.29973	concordant_down	4	1.70243	0.699136	yes	gene_down	TF_not_significant	coherent_activation_loss	active_enhancer	0	1	0	1	1	0	1	0	2	2	1	9	yes	2	EH38D3903176	EH38E2505025	dELS	dELS	EH38E2505025;EH38E2505026
peak_0067734	ELF3	Closing	ELF3	ELF3	known61.motif	chr6	134288543	134289064	SGK1	-1.78523	3.08622e-05	intron (NM_001143676, intron 1 of 13)	29254	gene_body	-3.29973	4.71684e-06	3.29973	concordant_down	4	0.0741507	1	yes	gene_down	TF_not_significant	coherent_activation_loss	active_enhancer	0	1	0	1	1	0	1	0	2	2	1	9	yes	2	EH38D3903176	EH38E2505025	dELS	dELS	EH38E2505025;EH38E2505026
peak_0067734	ELF4	Closing	Elf4	ELF4	known66.motif	chr6	134288543	134289064	SGK1	-1.78523	3.08622e-05	intron (NM_001143676, intron 1 of 13)	29254	gene_body	-3.29973	4.71684e-06	3.29973	concordant_down	4	0.216507	0.71809	yes	gene_down	TF_not_significant	coherent_activation_loss	active_enhancer	0	1	0	1	1	0	1	0	2	2	1	9	yes	2	EH38D3903176	EH38E2505025	dELS	dELS	EH38E2505025;EH38E2505026
peak_0067734	ELF5	Closing	ELF5	ELF5	known44.motif	chr6	134288543	134289064	SGK1	-1.78523	3.08622e-05	intron (NM_001143676, intron 1 of 13)	29254	gene_body	-3.29973	4.71684e-06	3.29973	concordant_down	4	0	1	yes	gene_down	TF_not_significant	coherent_activation_loss	active_enhancer	0	1	0	1	1	0	1	0	2	2	1	9	yes	2	EH38D3903176	EH38E2505025	dELS	dELS	EH38E2505025;EH38E2505026
peak_0067734	ERG	Closing	ERG	ERG	known81.motif	chr6	134288543	134289064	SGK1	-1.78523	3.08622e-05	intron (NM_001143676, intron 1 of 13)	29254	gene_body	-3.29973	4.71684e-06	3.29973	concordant_down	4	0.605698	1	yes	gene_down	TF_not_significant	coherent_activation_loss	active_enhancer	0	1	0	1	1	0	1	0	2	2	1	9	yes	2	EH38D3903176	EH38E2505025	dELS	dELS	EH38E2505025;EH38E2505026
peak_0067734	ETS1	Closing	ETS1	ETS1	known47.motif	chr6	134288543	134289064	SGK1	-1.78523	3.08622e-05	intron (NM_001143676, intron 1 of 13)	29254	gene_body	-3.29973	4.71684e-06	3.29973	concordant_down	4	0.148395	0.873217	yes	gene_down	TF_not_significant	coherent_activation_loss	active_enhancer	0	1	0	1	1	0	1	0	2	2	1	9	yes	2	EH38D3903176	EH38E2505025	dELS	dELS	EH38E2505025;EH38E2505026
peak_0067734	ETV1	Closing	ETV1	ETV1	known68.motif	chr6	134288543	134289064	SGK1	-1.78523	3.08622e-05	intron (NM_001143676, intron 1 of 13)	29254	gene_body	-3.29973	4.71684e-06	3.29973	concordant_down	4	-0.476315	1	yes	gene_down	TF_not_significant	coherent_activation_loss	active_enhancer	0	1	0	1	1	0	1	0	2	2	1	9	yes	2	EH38D3903176	EH38E2505025	dELS	dELS	EH38E2505025;EH38E2505026
peak_0067734	ETV2	Closing	Etv2	ETV2	known48.motif	chr6	134288543	134289064	SGK1	-1.78523	3.08622e-05	intron (NM_001143676, intron 1 of 13)	29254	gene_body	-3.29973	4.71684e-06	3.29973	concordant_down	4	-0.123413	1	yes	gene_down	TF_not_significant	coherent_activation_loss	active_enhancer	0	1	0	1	1	0	1	0	2	2	1	9	yes	2	EH38D3903176	EH38E2505025	dELS	dELS	EH38E2505025;EH38E2505026
peak_0067734	ETV4	Closing	ETV4	ETV4	known113.motif	chr6	134288543	134289064	SGK1	-1.78523	3.08622e-05	intron (NM_001143676, intron 1 of 13)	29254	gene_body	-3.29973	4.71684e-06	3.29973	concordant_down	4	-0.401784	1	yes	gene_down	TF_not_significant	coherent_activation_loss	active_enhancer	0	1	0	1	1	0	1	0	2	2	1	9	yes	2	EH38D3903176	EH38E2505025	dELS	dELS	EH38E2505025;EH38E2505026
peak_0067734	FLI1	Closing	Fli1	FLI1	known59.motif	chr6	134288543	134289064	SGK1	-1.78523	3.08622e-05	intron (NM_001143676, intron 1 of 13)	29254	gene_body	-3.29973	4.71684e-06	3.29973	concordant_down	4	0.453465	0.170815	yes	gene_down	TF_not_significant	coherent_activation_loss	active_enhancer	0	1	0	1	1	0	1	0	2	2	1	9	yes	2	EH38D3903176	EH38E2505025	dELS	dELS	EH38E2505025;EH38E2505026
peak_0067734	FOS	Closing	Fos	FOS	known5.motif	chr6	134288543	134289064	SGK1	-1.78523	3.08622e-05	intron (NM_001143676, intron 1 of 13)	29254	gene_body	-3.29973	4.71684e-06	3.29973	concordant_down	4	0.128665	1	yes	gene_down	TF_not_significant	coherent_activation_loss	active_enhancer	0	1	0	1	1	0	1	0	2	2	1	9	yes	2	EH38D3903176	EH38E2505025	dELS	dELS	EH38E2505025;EH38E2505026
peak_0067734	HLF	Closing	HLF	HLF	known39.motif	chr6	134288543	134289064	SGK1	-1.78523	3.08622e-05	intron (NM_001143676, intron 1 of 13)	29254	gene_body	-3.29973	4.71684e-06	3.29973	concordant_down	4	0.261211	1	yes	gene_down	TF_not_significant	coherent_activation_loss	active_enhancer	0	1	0	1	1	0	1	0	2	2	1	9	yes	2	EH38D3903176	EH38E2505025	dELS	dELS	EH38E2505025;EH38E2505026
peak_0067734	JUN	Closing	AP-1	JUN;FOS;JUNB;JUND;FOSL1;FOSL2;ATF3;BATF	known7.motif	chr6	134288543	134289064	SGK1	-1.78523	3.08622e-05	intron (NM_001143676, intron 1 of 13)	29254	gene_body	-3.29973	4.71684e-06	3.29973	concordant_down	4	0.329662	1	yes	gene_down	TF_not_significant	coherent_activation_loss	active_enhancer	0	1	0	1	1	0	1	0	2	2	1	9	yes	2	EH38D3903176	EH38E2505025	dELS	dELS	EH38E2505025;EH38E2505026
peak_0067734	JUN	Closing	EWS:ERG-fusion	EWS;ERG-FUSION;JUN;FOS;JUNB;FOSL1;FOSL2	known79.motif	chr6	134288543	134289064	SGK1	-1.78523	3.08622e-05	intron (NM_001143676, intron 1 of 13)	29254	gene_body	-3.29973	4.71684e-06	3.29973	concordant_down	4	0.329662	1	yes	gene_down	TF_not_significant	coherent_activation_loss	active_enhancer	0	1	0	1	1	0	1	0	2	2	1	9	yes	2	EH38D3903176	EH38E2505025	dELS	dELS	EH38E2505025;EH38E2505026
peak_0067734	MNT	Closing	MNT	MNT	known100.motif	chr6	134288543	134289064	SGK1	-1.78523	3.08622e-05	intron (NM_001143676, intron 1 of 13)	29254	gene_body	-3.29973	4.71684e-06	3.29973	concordant_down	4	-0.067775	1	yes	gene_down	TF_not_significant	coherent_activation_loss	active_enhancer	0	1	0	1	1	0	1	0	2	2	1	9	yes	2	EH38D3903176	EH38E2505025	dELS	dELS	EH38E2505025;EH38E2505026
peak_0067734	NEUROG2	Closing	NeuroG2	NEUROG2	known116.motif	chr6	134288543	134289064	SGK1	-1.78523	3.08622e-05	intron (NM_001143676, intron 1 of 13)	29254	gene_body	-3.29973	4.71684e-06	3.29973	concordant_down	4	-0.836985	1	yes	gene_down	TF_not_significant	coherent_activation_loss	active_enhancer	0	1	0	1	1	0	1	0	2	2	1	9	yes	2	EH38D3903176	EH38E2505025	dELS	dELS	EH38E2505025;EH38E2505026
peak_0067734	RFX1	Closing	Rfx1	RFX1	known94.motif	chr6	134288543	134289064	SGK1	-1.78523	3.08622e-05	intron (NM_001143676, intron 1 of 13)	29254	gene_body	-3.29973	4.71684e-06	3.29973	concordant_down	4	1.30202	1	yes	gene_down	TF_not_significant	coherent_activation_loss	active_enhancer	0	1	0	1	1	0	1	0	2	2	1	9	yes	2	EH38D3903176	EH38E2505025	dELS	dELS	EH38E2505025;EH38E2505026
peak_0067734	RUNX1	Closing	RUNX1	RUNX1	known27.motif	chr6	134288543	134289064	SGK1	-1.78523	3.08622e-05	intron (NM_001143676, intron 1 of 13)	29254	gene_body	-3.29973	4.71684e-06	3.29973	concordant_down	4	-0.107419	1	yes	gene_down	TF_not_significant	coherent_activation_loss	active_enhancer	0	1	0	1	1	0	1	0	2	2	1	9	yes	2	EH38D3903176	EH38E2505025	dELS	dELS	EH38E2505025;EH38E2505026
peak_0067734	RUNX2	Closing	RUNX2	RUNX2	known34.motif	chr6	134288543	134289064	SGK1	-1.78523	3.08622e-05	intron (NM_001143676, intron 1 of 13)	29254	gene_body	-3.29973	4.71684e-06	3.29973	concordant_down	4	-0.484095	1	yes	gene_down	TF_not_significant	coherent_activation_loss	active_enhancer	0	1	0	1	1	0	1	0	2	2	1	9	yes	2	EH38D3903176	EH38E2505025	dELS	dELS	EH38E2505025;EH38E2505026
peak_0067734	TCF4	Closing	TCF4	TCF4	known128.motif	chr6	134288543	134289064	SGK1	-1.78523	3.08622e-05	intron (NM_001143676, intron 1 of 13)	29254	gene_body	-3.29973	4.71684e-06	3.29973	concordant_down	4	-0.0799037	1	yes	gene_down	TF_not_significant	coherent_activation_loss	active_enhancer	0	1	0	1	1	0	1	0	2	2	1	9	yes	2	EH38D3903176	EH38E2505025	dELS	dELS	EH38E2505025;EH38E2505026
peak_0066127	ASCL2	Closing	Ascl2	ASCL2	known104.motif	chr6	44260241	44260818	SLC35B2	-1.11825	2.44467e-06	exon (NM_004556, exon 4 of 6)	-2640	gene_body	-1.16781	0.00014503	1.16781	concordant_down	4	0.302007	1	yes	gene_down	TF_not_significant	coherent_activation_loss	active_enhancer	0	1	1	1	1	0	0	1	2	2	1	9	yes	2	EH38D5756633	EH38E3709923	dELS	dELS	EH38E3709923;EH38E4402519
peak_0066127	EBF2	Closing	EBF2	EBF2	known105.motif	chr6	44260241	44260818	SLC35B2	-1.11825	2.44467e-06	exon (NM_004556, exon 4 of 6)	-2640	gene_body	-1.16781	0.00014503	1.16781	concordant_down	4	0	1	yes	gene_down	TF_not_significant	coherent_activation_loss	active_enhancer	0	1	1	1	1	0	0	1	2	2	1	9	yes	2	EH38D5756633	EH38E3709923	dELS	dELS	EH38E3709923;EH38E4402519
peak_0066127	EHF	Closing	EHF	EHF	known75.motif	chr6	44260241	44260818	SLC35B2	-1.11825	2.44467e-06	exon (NM_004556, exon 4 of 6)	-2640	gene_body	-1.16781	0.00014503	1.16781	concordant_down	4	1.70243	0.699136	yes	gene_down	TF_not_significant	coherent_activation_loss	active_enhancer	0	1	1	1	1	0	0	1	2	2	1	9	yes	2	EH38D5756633	EH38E3709923	dELS	dELS	EH38E3709923;EH38E4402519
peak_0066127	ELF3	Closing	ELF3	ELF3	known61.motif	chr6	44260241	44260818	SLC35B2	-1.11825	2.44467e-06	exon (NM_004556, exon 4 of 6)	-2640	gene_body	-1.16781	0.00014503	1.16781	concordant_down	4	0.0741507	1	yes	gene_down	TF_not_significant	coherent_activation_loss	active_enhancer	0	1	1	1	1	0	0	1	2	2	1	9	yes	2	EH38D5756633	EH38E3709923	dELS	dELS	EH38E3709923;EH38E4402519
peak_0066127	ELF4	Closing	Elf4	ELF4	known66.motif	chr6	44260241	44260818	SLC35B2	-1.11825	2.44467e-06	exon (NM_004556, exon 4 of 6)	-2640	gene_body	-1.16781	0.00014503	1.16781	concordant_down	4	0.216507	0.71809	yes	gene_down	TF_not_significant	coherent_activation_loss	active_enhancer	0	1	1	1	1	0	0	1	2	2	1	9	yes	2	EH38D5756633	EH38E3709923	dELS	dELS	EH38E3709923;EH38E4402519
peak_0066127	ELF5	Closing	ELF5	ELF5	known44.motif	chr6	44260241	44260818	SLC35B2	-1.11825	2.44467e-06	exon (NM_004556, exon 4 of 6)	-2640	gene_body	-1.16781	0.00014503	1.16781	concordant_down	4	0	1	yes	gene_down	TF_not_significant	coherent_activation_loss	active_enhancer	0	1	1	1	1	0	0	1	2	2	1	9	yes	2	EH38D5756633	EH38E3709923	dELS	dELS	EH38E3709923;EH38E4402519
peak_0066127	ERG	Closing	ERG	ERG	known81.motif	chr6	44260241	44260818	SLC35B2	-1.11825	2.44467e-06	exon (NM_004556, exon 4 of 6)	-2640	gene_body	-1.16781	0.00014503	1.16781	concordant_down	4	0.605698	1	yes	gene_down	TF_not_significant	coherent_activation_loss	active_enhancer	0	1	1	1	1	0	0	1	2	2	1	9	yes	2	EH38D5756633	EH38E3709923	dELS	dELS	EH38E3709923;EH38E4402519
peak_0066127	ETS1	Closing	ETS1	ETS1	known47.motif	chr6	44260241	44260818	SLC35B2	-1.11825	2.44467e-06	exon (NM_004556, exon 4 of 6)	-2640	gene_body	-1.16781	0.00014503	1.16781	concordant_down	4	0.148395	0.873217	yes	gene_down	TF_not_significant	coherent_activation_loss	active_enhancer	0	1	1	1	1	0	0	1	2	2	1	9	yes	2	EH38D5756633	EH38E3709923	dELS	dELS	EH38E3709923;EH38E4402519
peak_0066127	GFI1B	Closing	Gfi1b	GFI1B	known130.motif	chr6	44260241	44260818	SLC35B2	-1.11825	2.44467e-06	exon (NM_004556, exon 4 of 6)	-2640	gene_body	-1.16781	0.00014503	1.16781	concordant_down	4	0.0233349	1	yes	gene_down	TF_not_significant	coherent_activation_loss	active_enhancer	0	1	1	1	1	0	0	1	2	2	1	9	yes	2	EH38D5756633	EH38E3709923	dELS	dELS	EH38E3709923;EH38E4402519
peak_0066127	GLIS3	Closing	GLIS3	GLIS3	known110.motif	chr6	44260241	44260818	SLC35B2	-1.11825	2.44467e-06	exon (NM_004556, exon 4 of 6)	-2640	gene_body	-1.16781	0.00014503	1.16781	concordant_down	4	0	1	yes	gene_down	TF_not_significant	coherent_activation_loss	active_enhancer	0	1	1	1	1	0	0	1	2	2	1	9	yes	2	EH38D5756633	EH38E3709923	dELS	dELS	EH38E3709923;EH38E4402519
peak_0066127	JUN	Closing	AP-1	JUN;FOS;JUNB;JUND;FOSL1;FOSL2;ATF3;BATF	known7.motif	chr6	44260241	44260818	SLC35B2	-1.11825	2.44467e-06	exon (NM_004556, exon 4 of 6)	-2640	gene_body	-1.16781	0.00014503	1.16781	concordant_down	4	0.329662	1	yes	gene_down	TF_not_significant	coherent_activation_loss	active_enhancer	0	1	1	1	1	0	0	1	2	2	1	9	yes	2	EH38D5756633	EH38E3709923	dELS	dELS	EH38E3709923;EH38E4402519
peak_0066127	MAFA	Closing	MafA	MAFA	known123.motif	chr6	44260241	44260818	SLC35B2	-1.11825	2.44467e-06	exon (NM_004556, exon 4 of 6)	-2640	gene_body	-1.16781	0.00014503	1.16781	concordant_down	4	2.12167	0.391851	yes	gene_down	TF_not_significant	coherent_activation_loss	active_enhancer	0	1	1	1	1	0	0	1	2	2	1	9	yes	2	EH38D5756633	EH38E3709923	dELS	dELS	EH38E3709923;EH38E4402519
peak_0066127	MAZ	Closing	Maz	MAZ	known64.motif	chr6	44260241	44260818	SLC35B2	-1.11825	2.44467e-06	exon (NM_004556, exon 4 of 6)	-2640	gene_body	-1.16781	0.00014503	1.16781	concordant_down	4	-0.0810828	1	yes	gene_down	TF_not_significant	coherent_activation_loss	active_enhancer	0	1	1	1	1	0	0	1	2	2	1	9	yes	2	EH38D5756633	EH38E3709923	dELS	dELS	EH38E3709923;EH38E4402519
peak_0066127	MITF	Closing	MITF	MITF	known41.motif	chr6	44260241	44260818	SLC35B2	-1.11825	2.44467e-06	exon (NM_004556, exon 4 of 6)	-2640	gene_body	-1.16781	0.00014503	1.16781	concordant_down	4	0	1	yes	gene_down	TF_not_significant	coherent_activation_loss	active_enhancer	0	1	1	1	1	0	0	1	2	2	1	9	yes	2	EH38D5756633	EH38E3709923	dELS	dELS	EH38E3709923;EH38E4402519
peak_0066127	POU5F1	Closing	Oct4	POU5F1	known20.motif	chr6	44260241	44260818	SLC35B2	-1.11825	2.44467e-06	exon (NM_004556, exon 4 of 6)	-2640	gene_body	-1.16781	0.00014503	1.16781	concordant_down	4	0.714636	1	yes	gene_down	TF_not_significant	coherent_activation_loss	active_enhancer	0	1	1	1	1	0	0	1	2	2	1	9	yes	2	EH38D5756633	EH38E3709923	dELS	dELS	EH38E3709923;EH38E4402519
peak_0066127	PRDM10	Closing	PRDM10	PRDM10	known117.motif	chr6	44260241	44260818	SLC35B2	-1.11825	2.44467e-06	exon (NM_004556, exon 4 of 6)	-2640	gene_body	-1.16781	0.00014503	1.16781	concordant_down	4	0.292319	0.384812	yes	gene_down	TF_not_significant	coherent_activation_loss	active_enhancer	0	1	1	1	1	0	0	1	2	2	1	9	yes	2	EH38D5756633	EH38E3709923	dELS	dELS	EH38E3709923;EH38E4402519
peak_0066127	RFX6	Closing	Rfx6	RFX6	known127.motif	chr6	44260241	44260818	SLC35B2	-1.11825	2.44467e-06	exon (NM_004556, exon 4 of 6)	-2640	gene_body	-1.16781	0.00014503	1.16781	concordant_down	4	0.245026	1	yes	gene_down	TF_not_significant	coherent_activation_loss	active_enhancer	0	1	1	1	1	0	0	1	2	2	1	9	yes	2	EH38D5756633	EH38E3709923	dELS	dELS	EH38E3709923;EH38E4402519
peak_0066127	SPI1	Closing	PU.1	SPI1	known40.motif	chr6	44260241	44260818	SLC35B2	-1.11825	2.44467e-06	exon (NM_004556, exon 4 of 6)	-2640	gene_body	-1.16781	0.00014503	1.16781	concordant_down	4	0.124323	1	yes	gene_down	TF_not_significant	coherent_activation_loss	active_enhancer	0	1	1	1	1	0	0	1	2	2	1	9	yes	2	EH38D5756633	EH38E3709923	dELS	dELS	EH38E3709923;EH38E4402519
peak_0066127	SPIB	Closing	SpiB	SPIB	known17.motif	chr6	44260241	44260818	SLC35B2	-1.11825	2.44467e-06	exon (NM_004556, exon 4 of 6)	-2640	gene_body	-1.16781	0.00014503	1.16781	concordant_down	4	-0.0967045	1	yes	gene_down	TF_not_significant	coherent_activation_loss	active_enhancer	0	1	1	1	1	0	0	1	2	2	1	9	yes	2	EH38D5756633	EH38E3709923	dELS	dELS	EH38E3709923;EH38E4402519
peak_0030072	BATF	Closing	BATF	BATF	known3.motif	chr16	87895500	87896125	SLC7A5	-1.55948	2.24032e-06	intron (NR_159798, intron 5 of 7)	-26306	gene_body	-2.73247	0.00910627	2.73247	concordant_down	4	-0.596918	0.292535	yes	gene_down	TF_not_significant	coherent_activation_loss	active_enhancer	0	1	0	1	1	1	0	0	2	2	1	9	yes	2	EH38D2895946	EH38E1836584	dELS	dELS	EH38E1836584;EH38E3198639
peak_0030072	BHLHA15	Closing	BHLHA15	BHLHA15	known92.motif	chr16	87895500	87896125	SLC7A5	-1.55948	2.24032e-06	intron (NR_159798, intron 5 of 7)	-26306	gene_body	-2.73247	0.00910627	2.73247	concordant_down	4	-0.00604192	1	yes	gene_down	TF_not_significant	coherent_activation_loss	active_enhancer	0	1	0	1	1	1	0	0	2	2	1	9	yes	2	EH38D2895946	EH38E1836584	dELS	dELS	EH38E1836584;EH38E3198639
peak_0030072	CLOCK	Closing	CLOCK	CLOCK	known90.motif	chr16	87895500	87896125	SLC7A5	-1.55948	2.24032e-06	intron (NR_159798, intron 5 of 7)	-26306	gene_body	-2.73247	0.00910627	2.73247	concordant_down	4	-0.162156	1	yes	gene_down	TF_not_significant	coherent_activation_loss	active_enhancer	0	1	0	1	1	1	0	0	2	2	1	9	yes	2	EH38D2895946	EH38E1836584	dELS	dELS	EH38E1836584;EH38E3198639
peak_0030072	EBF2	Closing	EBF2	EBF2	known105.motif	chr16	87895500	87896125	SLC7A5	-1.55948	2.24032e-06	intron (NR_159798, intron 5 of 7)	-26306	gene_body	-2.73247	0.00910627	2.73247	concordant_down	4	0	1	yes	gene_down	TF_not_significant	coherent_activation_loss	active_enhancer	0	1	0	1	1	1	0	0	2	2	1	9	yes	2	EH38D2895946	EH38E1836584	dELS	dELS	EH38E1836584;EH38E3198639
peak_0030072	EGR1	Closing	Egr1	EGR1	known15.motif	chr16	87895500	87896125	SLC7A5	-1.55948	2.24032e-06	intron (NR_159798, intron 5 of 7)	-26306	gene_body	-2.73247	0.00910627	2.73247	concordant_down	4	-1.49241	0.648521	yes	gene_down	TF_not_significant	coherent_activation_loss	active_enhancer	0	1	0	1	1	1	0	0	2	2	1	9	yes	2	EH38D2895946	EH38E1836584	dELS	dELS	EH38E1836584;EH38E3198639
peak_0030072	FOS	Closing	Fos	FOS	known5.motif	chr16	87895500	87896125	SLC7A5	-1.55948	2.24032e-06	intron (NR_159798, intron 5 of 7)	-26306	gene_body	-2.73247	0.00910627	2.73247	concordant_down	4	0.128665	1	yes	gene_down	TF_not_significant	coherent_activation_loss	active_enhancer	0	1	0	1	1	1	0	0	2	2	1	9	yes	2	EH38D2895946	EH38E1836584	dELS	dELS	EH38E1836584;EH38E3198639
peak_0030072	HLF	Closing	HLF	HLF	known39.motif	chr16	87895500	87896125	SLC7A5	-1.55948	2.24032e-06	intron (NR_159798, intron 5 of 7)	-26306	gene_body	-2.73247	0.00910627	2.73247	concordant_down	4	0.261211	1	yes	gene_down	TF_not_significant	coherent_activation_loss	active_enhancer	0	1	0	1	1	1	0	0	2	2	1	9	yes	2	EH38D2895946	EH38E1836584	dELS	dELS	EH38E1836584;EH38E3198639
peak_0030072	JUN	Closing	Jun-AP1	JUN	known12.motif	chr16	87895500	87896125	SLC7A5	-1.55948	2.24032e-06	intron (NR_159798, intron 5 of 7)	-26306	gene_body	-2.73247	0.00910627	2.73247	concordant_down	4	0.329662	1	yes	gene_down	TF_not_significant	coherent_activation_loss	active_enhancer	0	1	0	1	1	1	0	0	2	2	1	9	yes	2	EH38D2895946	EH38E1836584	dELS	dELS	EH38E1836584;EH38E3198639
peak_0030072	JUN	Closing	AP-1	JUN;FOS;JUNB;JUND;FOSL1;FOSL2;ATF3;BATF	known7.motif	chr16	87895500	87896125	SLC7A5	-1.55948	2.24032e-06	intron (NR_159798, intron 5 of 7)	-26306	gene_body	-2.73247	0.00910627	2.73247	concordant_down	4	0.329662	1	yes	gene_down	TF_not_significant	coherent_activation_loss	active_enhancer	0	1	0	1	1	1	0	0	2	2	1	9	yes	2	EH38D2895946	EH38E1836584	dELS	dELS	EH38E1836584;EH38E3198639
peak_0030072	JUNB	Closing	JunB	JUNB	known6.motif	chr16	87895500	87896125	SLC7A5	-1.55948	2.24032e-06	intron (NR_159798, intron 5 of 7)	-26306	gene_body	-2.73247	0.00910627	2.73247	concordant_down	4	0.338285	1	yes	gene_down	TF_not_significant	coherent_activation_loss	active_enhancer	0	1	0	1	1	1	0	0	2	2	1	9	yes	2	EH38D2895946	EH38E1836584	dELS	dELS	EH38E1836584;EH38E3198639
peak_0030072	KLF14	Closing	KLF14	KLF14	known55.motif	chr16	87895500	87896125	SLC7A5	-1.55948	2.24032e-06	intron (NR_159798, intron 5 of 7)	-26306	gene_body	-2.73247	0.00910627	2.73247	concordant_down	4	0.424493	1	yes	gene_down	TF_not_significant	coherent_activation_loss	active_enhancer	0	1	0	1	1	1	0	0	2	2	1	9	yes	2	EH38D2895946	EH38E1836584	dELS	dELS	EH38E1836584;EH38E3198639
peak_0030072	KLF5	Closing	KLF5	KLF5	known134.motif	chr16	87895500	87896125	SLC7A5	-1.55948	2.24032e-06	intron (NR_159798, intron 5 of 7)	-26306	gene_body	-2.73247	0.00910627	2.73247	concordant_down	4	0.394372	1	yes	gene_down	TF_not_significant	coherent_activation_loss	active_enhancer	0	1	0	1	1	1	0	0	2	2	1	9	yes	2	EH38D2895946	EH38E1836584	dELS	dELS	EH38E1836584;EH38E3198639
peak_0030072	MAFA	Closing	MafA	MAFA	known123.motif	chr16	87895500	87896125	SLC7A5	-1.55948	2.24032e-06	intron (NR_159798, intron 5 of 7)	-26306	gene_body	-2.73247	0.00910627	2.73247	concordant_down	4	2.12167	0.391851	yes	gene_down	TF_not_significant	coherent_activation_loss	active_enhancer	0	1	0	1	1	1	0	0	2	2	1	9	yes	2	EH38D2895946	EH38E1836584	dELS	dELS	EH38E1836584;EH38E3198639
peak_0030072	MAZ	Closing	Maz	MAZ	known64.motif	chr16	87895500	87896125	SLC7A5	-1.55948	2.24032e-06	intron (NR_159798, intron 5 of 7)	-26306	gene_body	-2.73247	0.00910627	2.73247	concordant_down	4	-0.0810828	1	yes	gene_down	TF_not_significant	coherent_activation_loss	active_enhancer	0	1	0	1	1	1	0	0	2	2	1	9	yes	2	EH38D2895946	EH38E1836584	dELS	dELS	EH38E1836584;EH38E3198639
peak_0030072	MITF	Closing	MITF	MITF	known41.motif	chr16	87895500	87896125	SLC7A5	-1.55948	2.24032e-06	intron (NR_159798, intron 5 of 7)	-26306	gene_body	-2.73247	0.00910627	2.73247	concordant_down	4	0	1	yes	gene_down	TF_not_significant	coherent_activation_loss	active_enhancer	0	1	0	1	1	1	0	0	2	2	1	9	yes	2	EH38D2895946	EH38E1836584	dELS	dELS	EH38E1836584;EH38E3198639
peak_0030072	MNT	Closing	MNT	MNT	known100.motif	chr16	87895500	87896125	SLC7A5	-1.55948	2.24032e-06	intron (NR_159798, intron 5 of 7)	-26306	gene_body	-2.73247	0.00910627	2.73247	concordant_down	4	-0.067775	1	yes	gene_down	TF_not_significant	coherent_activation_loss	active_enhancer	0	1	0	1	1	1	0	0	2	2	1	9	yes	2	EH38D2895946	EH38E1836584	dELS	dELS	EH38E1836584;EH38E3198639
peak_0030072	NEUROG2	Closing	NeuroG2	NEUROG2	known116.motif	chr16	87895500	87896125	SLC7A5	-1.55948	2.24032e-06	intron (NR_159798, intron 5 of 7)	-26306	gene_body	-2.73247	0.00910627	2.73247	concordant_down	4	-0.836985	1	yes	gene_down	TF_not_significant	coherent_activation_loss	active_enhancer	0	1	0	1	1	1	0	0	2	2	1	9	yes	2	EH38D2895946	EH38E1836584	dELS	dELS	EH38E1836584;EH38E3198639
peak_0030072	PRDM1	Closing	PRDM1	PRDM1	known73.motif	chr16	87895500	87896125	SLC7A5	-1.55948	2.24032e-06	intron (NR_159798, intron 5 of 7)	-26306	gene_body	-2.73247	0.00910627	2.73247	concordant_down	4	-0.506444	1	yes	gene_down	TF_not_significant	coherent_activation_loss	active_enhancer	0	1	0	1	1	1	0	0	2	2	1	9	yes	2	EH38D2895946	EH38E1836584	dELS	dELS	EH38E1836584;EH38E3198639
peak_0030072	RFX6	Closing	Rfx6	RFX6	known127.motif	chr16	87895500	87896125	SLC7A5	-1.55948	2.24032e-06	intron (NR_159798, intron 5 of 7)	-26306	gene_body	-2.73247	0.00910627	2.73247	concordant_down	4	0.245026	1	yes	gene_down	TF_not_significant	coherent_activation_loss	active_enhancer	0	1	0	1	1	1	0	0	2	2	1	9	yes	2	EH38D2895946	EH38E1836584	dELS	dELS	EH38E1836584;EH38E3198639
peak_0030072	RUNX1	Closing	RUNX1	RUNX1	known27.motif	chr16	87895500	87896125	SLC7A5	-1.55948	2.24032e-06	intron (NR_159798, intron 5 of 7)	-26306	gene_body	-2.73247	0.00910627	2.73247	concordant_down	4	-0.107419	1	yes	gene_down	TF_not_significant	coherent_activation_loss	active_enhancer	0	1	0	1	1	1	0	0	2	2	1	9	yes	2	EH38D2895946	EH38E1836584	dELS	dELS	EH38E1836584;EH38E3198639
peak_0030072	RUNX2	Closing	RUNX2	RUNX2	known34.motif	chr16	87895500	87896125	SLC7A5	-1.55948	2.24032e-06	intron (NR_159798, intron 5 of 7)	-26306	gene_body	-2.73247	0.00910627	2.73247	concordant_down	4	-0.484095	1	yes	gene_down	TF_not_significant	coherent_activation_loss	active_enhancer	0	1	0	1	1	1	0	0	2	2	1	9	yes	2	EH38D2895946	EH38E1836584	dELS	dELS	EH38E1836584;EH38E3198639
peak_0030072	STAT4	Closing	STAT4	STAT4	known111.motif	chr16	87895500	87896125	SLC7A5	-1.55948	2.24032e-06	intron (NR_159798, intron 5 of 7)	-26306	gene_body	-2.73247	0.00910627	2.73247	concordant_down	4	-1.35402	1	yes	gene_down	TF_not_significant	coherent_activation_loss	active_enhancer	0	1	0	1	1	1	0	0	2	2	1	9	yes	2	EH38D2895946	EH38E1836584	dELS	dELS	EH38E1836584;EH38E3198639
peak_0030072	TCF4	Closing	TCF4	TCF4	known128.motif	chr16	87895500	87896125	SLC7A5	-1.55948	2.24032e-06	intron (NR_159798, intron 5 of 7)	-26306	gene_body	-2.73247	0.00910627	2.73247	concordant_down	4	-0.0799037	1	yes	gene_down	TF_not_significant	coherent_activation_loss	active_enhancer	0	1	0	1	1	1	0	0	2	2	1	9	yes	2	EH38D2895946	EH38E1836584	dELS	dELS	EH38E1836584;EH38E3198639
peak_0046480	BATF	Closing	BATF	BATF	known3.motif	chr20	17962754	17962982	SNORD17	-1.01588	8.52104e-06	promoter-TSS (NR_003045)	78	promoter	-0.722844	0.273897	0.722844	concordant_down	4	-0.596918	0.292535	yes	gene_not_significant	TF_not_significant	coherent_activation_loss	active_promoter	1	0	1	1	1	0	0	0	2	2	1	9	yes	1	EH38D5312977	EH38E3422344	PLS	PLS	EH38E3422344
peak_0046480	ELF4	Closing	Elf4	ELF4	known66.motif	chr20	17962754	17962982	SNORD17	-1.01588	8.52104e-06	promoter-TSS (NR_003045)	78	promoter	-0.722844	0.273897	0.722844	concordant_down	4	0.216507	0.71809	yes	gene_not_significant	TF_not_significant	coherent_activation_loss	active_promoter	1	0	1	1	1	0	0	0	2	2	1	9	yes	1	EH38D5312977	EH38E3422344	PLS	PLS	EH38E3422344
peak_0046480	ETV1	Closing	ETV1	ETV1	known68.motif	chr20	17962754	17962982	SNORD17	-1.01588	8.52104e-06	promoter-TSS (NR_003045)	78	promoter	-0.722844	0.273897	0.722844	concordant_down	4	-0.476315	1	yes	gene_not_significant	TF_not_significant	coherent_activation_loss	active_promoter	1	0	1	1	1	0	0	0	2	2	1	9	yes	1	EH38D5312977	EH38E3422344	PLS	PLS	EH38E3422344
peak_0046480	ETV4	Closing	ETV4	ETV4	known113.motif	chr20	17962754	17962982	SNORD17	-1.01588	8.52104e-06	promoter-TSS (NR_003045)	78	promoter	-0.722844	0.273897	0.722844	concordant_down	4	-0.401784	1	yes	gene_not_significant	TF_not_significant	coherent_activation_loss	active_promoter	1	0	1	1	1	0	0	0	2	2	1	9	yes	1	EH38D5312977	EH38E3422344	PLS	PLS	EH38E3422344
peak_0046480	FOS	Closing	Fos	FOS	known5.motif	chr20	17962754	17962982	SNORD17	-1.01588	8.52104e-06	promoter-TSS (NR_003045)	78	promoter	-0.722844	0.273897	0.722844	concordant_down	4	0.128665	1	yes	gene_not_significant	TF_not_significant	coherent_activation_loss	active_promoter	1	0	1	1	1	0	0	0	2	2	1	9	yes	1	EH38D5312977	EH38E3422344	PLS	PLS	EH38E3422344
peak_0046480	GABPA	Closing	GABPA	GABPA	known99.motif	chr20	17962754	17962982	SNORD17	-1.01588	8.52104e-06	promoter-TSS (NR_003045)	78	promoter	-0.722844	0.273897	0.722844	concordant_down	4	-0.175586	0.446906	yes	gene_not_significant	TF_not_significant	coherent_activation_loss	active_promoter	1	0	1	1	1	0	0	0	2	2	1	9	yes	1	EH38D5312977	EH38E3422344	PLS	PLS	EH38E3422344
peak_0046480	JUN	Closing	AP-1	JUN;FOS;JUNB;JUND;FOSL1;FOSL2;ATF3;BATF	known7.motif	chr20	17962754	17962982	SNORD17	-1.01588	8.52104e-06	promoter-TSS (NR_003045)	78	promoter	-0.722844	0.273897	0.722844	concordant_down	4	0.329662	1	yes	gene_not_significant	TF_not_significant	coherent_activation_loss	active_promoter	1	0	1	1	1	0	0	0	2	2	1	9	yes	1	EH38D5312977	EH38E3422344	PLS	PLS	EH38E3422344
peak_0046480	JUNB	Closing	JunB	JUNB	known6.motif	chr20	17962754	17962982	SNORD17	-1.01588	8.52104e-06	promoter-TSS (NR_003045)	78	promoter	-0.722844	0.273897	0.722844	concordant_down	4	0.338285	1	yes	gene_not_significant	TF_not_significant	coherent_activation_loss	active_promoter	1	0	1	1	1	0	0	0	2	2	1	9	yes	1	EH38D5312977	EH38E3422344	PLS	PLS	EH38E3422344
peak_0046480	MAFA	Closing	MafA	MAFA	known123.motif	chr20	17962754	17962982	SNORD17	-1.01588	8.52104e-06	promoter-TSS (NR_003045)	78	promoter	-0.722844	0.273897	0.722844	concordant_down	4	2.12167	0.391851	yes	gene_not_significant	TF_not_significant	coherent_activation_loss	active_promoter	1	0	1	1	1	0	0	0	2	2	1	9	yes	1	EH38D5312977	EH38E3422344	PLS	PLS	EH38E3422344
peak_0046480	RFX6	Closing	Rfx6	RFX6	known127.motif	chr20	17962754	17962982	SNORD17	-1.01588	8.52104e-06	promoter-TSS (NR_003045)	78	promoter	-0.722844	0.273897	0.722844	concordant_down	4	0.245026	1	yes	gene_not_significant	TF_not_significant	coherent_activation_loss	active_promoter	1	0	1	1	1	0	0	0	2	2	1	9	yes	1	EH38D5312977	EH38E3422344	PLS	PLS	EH38E3422344
peak_0046480	SPI1	Closing	PU.1	SPI1	known40.motif	chr20	17962754	17962982	SNORD17	-1.01588	8.52104e-06	promoter-TSS (NR_003045)	78	promoter	-0.722844	0.273897	0.722844	concordant_down	4	0.124323	1	yes	gene_not_significant	TF_not_significant	coherent_activation_loss	active_promoter	1	0	1	1	1	0	0	0	2	2	1	9	yes	1	EH38D5312977	EH38E3422344	PLS	PLS	EH38E3422344
peak_0046480	STAT4	Closing	STAT4	STAT4	known111.motif	chr20	17962754	17962982	SNORD17	-1.01588	8.52104e-06	promoter-TSS (NR_003045)	78	promoter	-0.722844	0.273897	0.722844	concordant_down	4	-1.35402	1	yes	gene_not_significant	TF_not_significant	coherent_activation_loss	active_promoter	1	0	1	1	1	0	0	0	2	2	1	9	yes	1	EH38D5312977	EH38E3422344	PLS	PLS	EH38E3422344
peak_0017714	EGR1	Closing	Egr1	EGR1	known15.motif	chr12	54981904	54982097	TESPA1	-1.95196	4.19074e-06	promoter-TSS (NM_001098815)	-70	promoter	-0.999186	5.64404e-06	0.999186	concordant_down	4	-1.49241	0.648521	yes	gene_down	TF_not_significant	coherent_activation_loss	active_promoter	1	0	1	1	1	0	0	1	2	2	1	9	yes	1	EH38D4696825	EH38E3019823	PLS	PLS	EH38E3019823
peak_0017714	EHF	Closing	EHF	EHF	known75.motif	chr12	54981904	54982097	TESPA1	-1.95196	4.19074e-06	promoter-TSS (NM_001098815)	-70	promoter	-0.999186	5.64404e-06	0.999186	concordant_down	4	1.70243	0.699136	yes	gene_down	TF_not_significant	coherent_activation_loss	active_promoter	1	0	1	1	1	0	0	1	2	2	1	9	yes	1	EH38D4696825	EH38E3019823	PLS	PLS	EH38E3019823
peak_0017714	ELF3	Closing	ELF3	ELF3	known61.motif	chr12	54981904	54982097	TESPA1	-1.95196	4.19074e-06	promoter-TSS (NM_001098815)	-70	promoter	-0.999186	5.64404e-06	0.999186	concordant_down	4	0.0741507	1	yes	gene_down	TF_not_significant	coherent_activation_loss	active_promoter	1	0	1	1	1	0	0	1	2	2	1	9	yes	1	EH38D4696825	EH38E3019823	PLS	PLS	EH38E3019823
peak_0017714	ELF5	Closing	ELF5	ELF5	known44.motif	chr12	54981904	54982097	TESPA1	-1.95196	4.19074e-06	promoter-TSS (NM_001098815)	-70	promoter	-0.999186	5.64404e-06	0.999186	concordant_down	4	0	1	yes	gene_down	TF_not_significant	coherent_activation_loss	active_promoter	1	0	1	1	1	0	0	1	2	2	1	9	yes	1	EH38D4696825	EH38E3019823	PLS	PLS	EH38E3019823
peak_0017714	ERG	Closing	ERG	ERG	known81.motif	chr12	54981904	54982097	TESPA1	-1.95196	4.19074e-06	promoter-TSS (NM_001098815)	-70	promoter	-0.999186	5.64404e-06	0.999186	concordant_down	4	0.605698	1	yes	gene_down	TF_not_significant	coherent_activation_loss	active_promoter	1	0	1	1	1	0	0	1	2	2	1	9	yes	1	EH38D4696825	EH38E3019823	PLS	PLS	EH38E3019823
peak_0017714	ETS1	Closing	ETS1	ETS1	known47.motif	chr12	54981904	54982097	TESPA1	-1.95196	4.19074e-06	promoter-TSS (NM_001098815)	-70	promoter	-0.999186	5.64404e-06	0.999186	concordant_down	4	0.148395	0.873217	yes	gene_down	TF_not_significant	coherent_activation_loss	active_promoter	1	0	1	1	1	0	0	1	2	2	1	9	yes	1	EH38D4696825	EH38E3019823	PLS	PLS	EH38E3019823
peak_0017714	ETV2	Closing	Etv2	ETV2	known48.motif	chr12	54981904	54982097	TESPA1	-1.95196	4.19074e-06	promoter-TSS (NM_001098815)	-70	promoter	-0.999186	5.64404e-06	0.999186	concordant_down	4	-0.123413	1	yes	gene_down	TF_not_significant	coherent_activation_loss	active_promoter	1	0	1	1	1	0	0	1	2	2	1	9	yes	1	EH38D4696825	EH38E3019823	PLS	PLS	EH38E3019823
peak_0017714	JUN	Closing	EWS:ERG-fusion	EWS;ERG-FUSION;JUN;FOS;JUNB;FOSL1;FOSL2	known79.motif	chr12	54981904	54982097	TESPA1	-1.95196	4.19074e-06	promoter-TSS (NM_001098815)	-70	promoter	-0.999186	5.64404e-06	0.999186	concordant_down	4	0.329662	1	yes	gene_down	TF_not_significant	coherent_activation_loss	active_promoter	1	0	1	1	1	0	0	1	2	2	1	9	yes	1	EH38D4696825	EH38E3019823	PLS	PLS	EH38E3019823
peak_0017714	RELA	Closing	NFkB-p65-Rel	RELA;REL	known14.motif	chr12	54981904	54982097	TESPA1	-1.95196	4.19074e-06	promoter-TSS (NM_001098815)	-70	promoter	-0.999186	5.64404e-06	0.999186	concordant_down	4	0.0602568	1	yes	gene_down	TF_not_significant	coherent_activation_loss	active_promoter	1	0	1	1	1	0	0	1	2	2	1	9	yes	1	EH38D4696825	EH38E3019823	PLS	PLS	EH38E3019823
peak_0075635	ASCL1	Opening	Ascl1	ASCL1	known1.motif	chr8	94941466	94942029	TP53INP1	1.00216	1.01224e-05	intron (NM_001135733, intron 1 of 4)	7630	gene_body	1.26915	0.00414178	1.26915	concordant_up	4	0	1	yes	gene_up	TF_not_significant	coherent_activation_gain	active_enhancer	0	1	1	1	1	0	0	1	2	2	1	9	yes	2	EH38D5969552	EH38E3845692	dELS	dELS	EH38E3845692;EH38E3845693
peak_0075635	ASCL2	Opening	Ascl2	ASCL2	known13.motif	chr8	94941466	94942029	TP53INP1	1.00216	1.01224e-05	intron (NM_001135733, intron 1 of 4)	7630	gene_body	1.26915	0.00414178	1.26915	concordant_up	4	0.302007	1	yes	gene_up	TF_not_significant	coherent_activation_gain	active_enhancer	0	1	1	1	1	0	0	1	2	2	1	9	yes	2	EH38D5969552	EH38E3845692	dELS	dELS	EH38E3845692;EH38E3845693
peak_0075635	ERG	Opening	ERG	ERG	known8.motif	chr8	94941466	94942029	TP53INP1	1.00216	1.01224e-05	intron (NM_001135733, intron 1 of 4)	7630	gene_body	1.26915	0.00414178	1.26915	concordant_up	4	0.605698	1	yes	gene_up	TF_not_significant	coherent_activation_gain	active_enhancer	0	1	1	1	1	0	0	1	2	2	1	9	yes	2	EH38D5969552	EH38E3845692	dELS	dELS	EH38E3845692;EH38E3845693
peak_0075635	ETV2	Opening	Etv2	ETV2	known3.motif	chr8	94941466	94942029	TP53INP1	1.00216	1.01224e-05	intron (NM_001135733, intron 1 of 4)	7630	gene_body	1.26915	0.00414178	1.26915	concordant_up	4	-0.123413	1	yes	gene_up	TF_not_significant	coherent_activation_gain	active_enhancer	0	1	1	1	1	0	0	1	2	2	1	9	yes	2	EH38D5969552	EH38E3845692	dELS	dELS	EH38E3845692;EH38E3845693
peak_0075635	FLI1	Opening	EWS:FLI1-fusion	FLI1	known14.motif	chr8	94941466	94942029	TP53INP1	1.00216	1.01224e-05	intron (NM_001135733, intron 1 of 4)	7630	gene_body	1.26915	0.00414178	1.26915	concordant_up	4	0.453465	0.170815	yes	gene_up	TF_not_significant	coherent_activation_gain	active_enhancer	0	1	1	1	1	0	0	1	2	2	1	9	yes	2	EH38D5969552	EH38E3845692	dELS	dELS	EH38E3845692;EH38E3845693
peak_0075635	GABPA	Opening	GABPA	GABPA	known9.motif	chr8	94941466	94942029	TP53INP1	1.00216	1.01224e-05	intron (NM_001135733, intron 1 of 4)	7630	gene_body	1.26915	0.00414178	1.26915	concordant_up	4	-0.175586	0.446906	yes	gene_up	TF_not_significant	coherent_activation_gain	active_enhancer	0	1	1	1	1	0	0	1	2	2	1	9	yes	2	EH38D5969552	EH38E3845692	dELS	dELS	EH38E3845692;EH38E3845693
peak_0075635	HLF	Opening	HLF	HLF	known7.motif	chr8	94941466	94942029	TP53INP1	1.00216	1.01224e-05	intron (NM_001135733, intron 1 of 4)	7630	gene_body	1.26915	0.00414178	1.26915	concordant_up	4	0.261211	1	yes	gene_up	TF_not_significant	coherent_activation_gain	active_enhancer	0	1	1	1	1	0	0	1	2	2	1	9	yes	2	EH38D5969552	EH38E3845692	dELS	dELS	EH38E3845692;EH38E3845693
peak_0075635	SNAI1	Opening	Snail1	SNAI1	known12.motif	chr8	94941466	94942029	TP53INP1	1.00216	1.01224e-05	intron (NM_001135733, intron 1 of 4)	7630	gene_body	1.26915	0.00414178	1.26915	concordant_up	4	-0.628517	1	yes	gene_up	TF_not_significant	coherent_activation_gain	active_enhancer	0	1	1	1	1	0	0	1	2	2	1	9	yes	2	EH38D5969552	EH38E3845692	dELS	dELS	EH38E3845692;EH38E3845693
peak_0075635	SNAI2	Opening	Slug	SNAI2	known15.motif	chr8	94941466	94942029	TP53INP1	1.00216	1.01224e-05	intron (NM_001135733, intron 1 of 4)	7630	gene_body	1.26915	0.00414178	1.26915	concordant_up	4	0	1	yes	gene_up	TF_not_significant	coherent_activation_gain	active_enhancer	0	1	1	1	1	0	0	1	2	2	1	9	yes	2	EH38D5969552	EH38E3845692	dELS	dELS	EH38E3845692;EH38E3845693
peak_0075635	TCF12	Opening	HEB	TCF12	known4.motif	chr8	94941466	94942029	TP53INP1	1.00216	1.01224e-05	intron (NM_001135733, intron 1 of 4)	7630	gene_body	1.26915	0.00414178	1.26915	concordant_up	4	-0.264223	0.326118	yes	gene_up	TF_not_significant	coherent_activation_gain	active_enhancer	0	1	1	1	1	0	0	1	2	2	1	9	yes	2	EH38D5969552	EH38E3845692	dELS	dELS	EH38E3845692;EH38E3845693
peak_0075635	TCF3	Opening	E2A	TCF3	known10.motif	chr8	94941466	94942029	TP53INP1	1.00216	1.01224e-05	intron (NM_001135733, intron 1 of 4)	7630	gene_body	1.26915	0.00414178	1.26915	concordant_up	4	0.218273	1	yes	gene_up	TF_not_significant	coherent_activation_gain	active_enhancer	0	1	1	1	1	0	0	1	2	2	1	9	yes	2	EH38D5969552	EH38E3845692	dELS	dELS	EH38E3845692;EH38E3845693
peak_0075635	TCF3	Opening	E2A	TCF3	known11.motif	chr8	94941466	94942029	TP53INP1	1.00216	1.01224e-05	intron (NM_001135733, intron 1 of 4)	7630	gene_body	1.26915	0.00414178	1.26915	concordant_up	4	0.218273	1	yes	gene_up	TF_not_significant	coherent_activation_gain	active_enhancer	0	1	1	1	1	0	0	1	2	2	1	9	yes	2	EH38D5969552	EH38E3845692	dELS	dELS	EH38E3845692;EH38E3845693
peak_0042805	IRF4	Closing	IRF4	IRF4	known28.motif	chr2	111049718	111050720	ACOXL-AS1	-1.25054	3.11381e-10	intron (NM_001371254, intron 17 of 18)	65369	gene_body	-1.30481	0.510442	1.30481	concordant_down	3	-1.96215	1.03297e-08	yes	gene_not_significant	TF_down	coherent_activation_loss	active_enhancer	0	1	1	1	1	1	0	0	2	2	2	9	yes	3	EH38D3164328	EH38E2024606	dELS	dELS	EH38E2024606;EH38E2024607;EH38E3364693
peak_0042805	NFATC1	Closing	NFAT	NFATC1;NFATC2;NFATC3;NFATC4	known2.motif	chr2	111049718	111050720	ACOXL-AS1	-1.25054	3.11381e-10	intron (NM_001371254, intron 17 of 18)	65369	gene_body	-1.30481	0.510442	1.30481	concordant_down	3	-0.764829	0.0475296	yes	gene_not_significant	TF_down	coherent_activation_loss	active_enhancer	0	1	1	1	1	1	0	0	2	2	2	9	yes	3	EH38D3164328	EH38E2024606	dELS	dELS	EH38E2024606;EH38E2024607;EH38E3364693
peak_0042805	NFKB1	Closing	NFkB-p65	NFKB1;RELA;RELB;NFKB2;REL	known10.motif	chr2	111049718	111050720	ACOXL-AS1	-1.25054	3.11381e-10	intron (NM_001371254, intron 17 of 18)	65369	gene_body	-1.30481	0.510442	1.30481	concordant_down	3	-1.24321	1.12356e-09	yes	gene_not_significant	TF_down	coherent_activation_loss	active_enhancer	0	1	1	1	1	1	0	0	2	2	2	9	yes	3	EH38D3164328	EH38E2024606	dELS	dELS	EH38E2024606;EH38E2024607;EH38E3364693
peak_0042806	NFKB1	Closing	NFkB-p65	NFKB1;RELA;RELB;NFKB2;REL	known10.motif	chr2	111055099	111055675	ACOXL-AS1	-1.24422	5.83974e-09	intron (NM_001371254, intron 17 of 18)	60201	gene_body	-1.30481	0.510442	1.30481	concordant_down	3	-1.24321	1.12356e-09	yes	gene_not_significant	TF_down	coherent_activation_loss	active_enhancer	0	1	0	1	1	1	0	0	2	2	2	9	yes	3	EH38D5223567	EH38E3364698	dELS	dELS	EH38E3364698;EH38E3364699;EH38E3364700
peak_0079093	ATF3	Closing	Atf3	ATF3	known9.motif	chr9	108885631	108886310	ACTL7A	-1.20558	2.02809e-05	intron (NM_001330749, intron 27 of 34)	23705	gene_body	-0.458672	1	0.458672	concordant_down	3	-3.92028	0.000169874	yes	gene_not_significant	TF_down	coherent_activation_loss	active_enhancer	0	1	0	1	1	0	0	1	2	2	2	9	yes	2	EH38D4224660	EH38E2716332	dELS	dELS	EH38E2716332;EH38E3900417
peak_0079093	FOSL1	Closing	Fra1	FOSL1	known4.motif	chr9	108885631	108886310	ACTL7A	-1.20558	2.02809e-05	intron (NM_001330749, intron 27 of 34)	23705	gene_body	-0.458672	1	0.458672	concordant_down	3	-2.84522	0.0038438	yes	gene_not_significant	TF_down	coherent_activation_loss	active_enhancer	0	1	0	1	1	0	0	1	2	2	2	9	yes	2	EH38D4224660	EH38E2716332	dELS	dELS	EH38E2716332;EH38E3900417
peak_0079093	FOSL2	Closing	Fra2	FOSL2	known11.motif	chr9	108885631	108886310	ACTL7A	-1.20558	2.02809e-05	intron (NM_001330749, intron 27 of 34)	23705	gene_body	-0.458672	1	0.458672	concordant_down	3	-2.94385	0.00157751	yes	gene_not_significant	TF_down	coherent_activation_loss	active_enhancer	0	1	0	1	1	0	0	1	2	2	2	9	yes	2	EH38D4224660	EH38E2716332	dELS	dELS	EH38E2716332;EH38E3900417
peak_0079093	FOSL2	Closing	Fosl2	FOSL2	known8.motif	chr9	108885631	108886310	ACTL7A	-1.20558	2.02809e-05	intron (NM_001330749, intron 27 of 34)	23705	gene_body	-0.458672	1	0.458672	concordant_down	3	-2.94385	0.00157751	yes	gene_not_significant	TF_down	coherent_activation_loss	active_enhancer	0	1	0	1	1	0	0	1	2	2	2	9	yes	2	EH38D4224660	EH38E2716332	dELS	dELS	EH38E2716332;EH38E3900417
peak_0079093	NFATC1	Closing	NFAT	NFATC1;NFATC2;NFATC3;NFATC4	known2.motif	chr9	108885631	108886310	ACTL7A	-1.20558	2.02809e-05	intron (NM_001330749, intron 27 of 34)	23705	gene_body	-0.458672	1	0.458672	concordant_down	3	-0.764829	0.0475296	yes	gene_not_significant	TF_down	coherent_activation_loss	active_enhancer	0	1	0	1	1	0	0	1	2	2	2	9	yes	2	EH38D4224660	EH38E2716332	dELS	dELS	EH38E2716332;EH38E3900417
peak_0079093	NFKB1	Closing	NFkB-p65	NFKB1;RELA;RELB;NFKB2;REL	known10.motif	chr9	108885631	108886310	ACTL7A	-1.20558	2.02809e-05	intron (NM_001330749, intron 27 of 34)	23705	gene_body	-0.458672	1	0.458672	concordant_down	3	-1.24321	1.12356e-09	yes	gene_not_significant	TF_down	coherent_activation_loss	active_enhancer	0	1	0	1	1	0	0	1	2	2	2	9	yes	2	EH38D4224660	EH38E2716332	dELS	dELS	EH38E2716332;EH38E3900417
peak_0039707	ATF3	Closing	Atf3	ATF3	known9.motif	chr2	9552599	9552839	ADAM17	-1.32004	0.000117724	intron (NM_003183, intron 1 of 18)	3111	gene_body	-0.229876	0.514042	0.229876	concordant_down	3	-3.92028	0.000169874	yes	gene_not_significant	TF_down	coherent_activation_loss	active_enhancer	0	1	1	1	1	0	0	0	2	2	2	9	yes	1	EH38D5161087	EH38E3323799	dELS	dELS	EH38E3323799
peak_0039707	FOSL1	Closing	Fra1	FOSL1	known4.motif	chr2	9552599	9552839	ADAM17	-1.32004	0.000117724	intron (NM_003183, intron 1 of 18)	3111	gene_body	-0.229876	0.514042	0.229876	concordant_down	3	-2.84522	0.0038438	yes	gene_not_significant	TF_down	coherent_activation_loss	active_enhancer	0	1	1	1	1	0	0	0	2	2	2	9	yes	1	EH38D5161087	EH38E3323799	dELS	dELS	EH38E3323799
peak_0039707	FOSL2	Closing	Fra2	FOSL2	known11.motif	chr2	9552599	9552839	ADAM17	-1.32004	0.000117724	intron (NM_003183, intron 1 of 18)	3111	gene_body	-0.229876	0.514042	0.229876	concordant_down	3	-2.94385	0.00157751	yes	gene_not_significant	TF_down	coherent_activation_loss	active_enhancer	0	1	1	1	1	0	0	0	2	2	2	9	yes	1	EH38D5161087	EH38E3323799	dELS	dELS	EH38E3323799
peak_0039707	FOSL2	Closing	Fosl2	FOSL2	known8.motif	chr2	9552599	9552839	ADAM17	-1.32004	0.000117724	intron (NM_003183, intron 1 of 18)	3111	gene_body	-0.229876	0.514042	0.229876	concordant_down	3	-2.94385	0.00157751	yes	gene_not_significant	TF_down	coherent_activation_loss	active_enhancer	0	1	1	1	1	0	0	0	2	2	2	9	yes	1	EH38D5161087	EH38E3323799	dELS	dELS	EH38E3323799
peak_0001827	IRF4	Closing	IRF4	IRF4	known28.motif	chr1	33024608	33025451	AK2	-1.2789	0.000153098	intron (NR_134976, intron 1 of 5)	11853	gene_body	-0.440908	0.012768	0.440908	concordant_down	3	-1.96215	1.03297e-08	yes	gene_down	TF_down	coherent_activation_loss	active_enhancer	0	1	0	1	1	0	0	1	2	2	2	9	yes	3	EH38D2148736	EH38E1335597	dELS	dELS	EH38E1335597;EH38E2801511;EH38E2801512
peak_0001827	NFATC1	Closing	NFAT:AP1	NFATC1;NFATC2;NFATC3;NFATC4;JUN;FOS;BATF	known1.motif	chr1	33024608	33025451	AK2	-1.2789	0.000153098	intron (NR_134976, intron 1 of 5)	11853	gene_body	-0.440908	0.012768	0.440908	concordant_down	3	-0.764829	0.0475296	yes	gene_down	TF_down	coherent_activation_loss	active_enhancer	0	1	0	1	1	0	0	1	2	2	2	9	yes	3	EH38D2148736	EH38E1335597	dELS	dELS	EH38E1335597;EH38E2801511;EH38E2801512
peak_0001827	NFATC1	Closing	NFAT	NFATC1;NFATC2;NFATC3;NFATC4	known2.motif	chr1	33024608	33025451	AK2	-1.2789	0.000153098	intron (NR_134976, intron 1 of 5)	11853	gene_body	-0.440908	0.012768	0.440908	concordant_down	3	-0.764829	0.0475296	yes	gene_down	TF_down	coherent_activation_loss	active_enhancer	0	1	0	1	1	0	0	1	2	2	2	9	yes	3	EH38D2148736	EH38E1335597	dELS	dELS	EH38E1335597;EH38E2801511;EH38E2801512
peak_0001827	NFKB1	Closing	NFkB-p65	NFKB1;RELA;RELB;NFKB2;REL	known10.motif	chr1	33024608	33025451	AK2	-1.2789	0.000153098	intron (NR_134976, intron 1 of 5)	11853	gene_body	-0.440908	0.012768	0.440908	concordant_down	3	-1.24321	1.12356e-09	yes	gene_down	TF_down	coherent_activation_loss	active_enhancer	0	1	0	1	1	0	0	1	2	2	2	9	yes	3	EH38D2148736	EH38E1335597	dELS	dELS	EH38E1335597;EH38E2801511;EH38E2801512
peak_0001827	NFKB1	Closing	NFkB-p50,p52	NFKB1;NFKB2	known13.motif	chr1	33024608	33025451	AK2	-1.2789	0.000153098	intron (NR_134976, intron 1 of 5)	11853	gene_body	-0.440908	0.012768	0.440908	concordant_down	3	-1.24321	1.12356e-09	yes	gene_down	TF_down	coherent_activation_loss	active_enhancer	0	1	0	1	1	0	0	1	2	2	2	9	yes	3	EH38D2148736	EH38E1335597	dELS	dELS	EH38E1335597;EH38E2801511;EH38E2801512
peak_0033157	ATF3	Closing	Atf3	ATF3	known9.motif	chr17	68249023	68249192	AMZ2	-1.15601	2.85095e-05	intron (NM_001033569, intron 2 of 7)	1065	gene_body	-0.120128	0.848832	0.120128	concordant_down	3	-3.92028	0.000169874	yes	gene_not_significant	TF_down	coherent_activation_loss	active_enhancer	0	1	1	1	1	0	0	0	2	2	2	9	yes	1	EH38D2956215	EH38E1881114	PLS	PLS	EH38E1881114
peak_0033157	FOSL1	Closing	Fra1	FOSL1	known4.motif	chr17	68249023	68249192	AMZ2	-1.15601	2.85095e-05	intron (NM_001033569, intron 2 of 7)	1065	gene_body	-0.120128	0.848832	0.120128	concordant_down	3	-2.84522	0.0038438	yes	gene_not_significant	TF_down	coherent_activation_loss	active_enhancer	0	1	1	1	1	0	0	0	2	2	2	9	yes	1	EH38D2956215	EH38E1881114	PLS	PLS	EH38E1881114
peak_0033157	FOSL2	Closing	Fra2	FOSL2	known11.motif	chr17	68249023	68249192	AMZ2	-1.15601	2.85095e-05	intron (NM_001033569, intron 2 of 7)	1065	gene_body	-0.120128	0.848832	0.120128	concordant_down	3	-2.94385	0.00157751	yes	gene_not_significant	TF_down	coherent_activation_loss	active_enhancer	0	1	1	1	1	0	0	0	2	2	2	9	yes	1	EH38D2956215	EH38E1881114	PLS	PLS	EH38E1881114
peak_0033157	FOSL2	Closing	Fosl2	FOSL2	known8.motif	chr17	68249023	68249192	AMZ2	-1.15601	2.85095e-05	intron (NM_001033569, intron 2 of 7)	1065	gene_body	-0.120128	0.848832	0.120128	concordant_down	3	-2.94385	0.00157751	yes	gene_not_significant	TF_down	coherent_activation_loss	active_enhancer	0	1	1	1	1	0	0	0	2	2	2	9	yes	1	EH38D2956215	EH38E1881114	PLS	PLS	EH38E1881114
peak_0045288	IRF4	Closing	IRF4	IRF4	known28.motif	chr2	223800827	223801355	AP1S3	-1.4	1.7114e-06	intron (NR_110905, intron 1 of 5)	36491	gene_body	-0.22293	0.64304	0.22293	concordant_down	3	-1.96215	1.03297e-08	yes	gene_not_significant	TF_down	coherent_activation_loss	active_enhancer	0	1	0	1	1	0	0	0	2	2	2	9	yes	1	EH38D5283522	EH38E3403144	dELS	dELS	EH38E3403144
peak_0045288	NFATC1	Closing	NFAT:AP1	NFATC1;NFATC2;NFATC3;NFATC4;JUN;FOS;BATF	known1.motif	chr2	223800827	223801355	AP1S3	-1.4	1.7114e-06	intron (NR_110905, intron 1 of 5)	36491	gene_body	-0.22293	0.64304	0.22293	concordant_down	3	-0.764829	0.0475296	yes	gene_not_significant	TF_down	coherent_activation_loss	active_enhancer	0	1	0	1	1	0	0	0	2	2	2	9	yes	1	EH38D5283522	EH38E3403144	dELS	dELS	EH38E3403144
peak_0045288	NFATC1	Closing	NFAT	NFATC1;NFATC2;NFATC3;NFATC4	known2.motif	chr2	223800827	223801355	AP1S3	-1.4	1.7114e-06	intron (NR_110905, intron 1 of 5)	36491	gene_body	-0.22293	0.64304	0.22293	concordant_down	3	-0.764829	0.0475296	yes	gene_not_significant	TF_down	coherent_activation_loss	active_enhancer	0	1	0	1	1	0	0	0	2	2	2	9	yes	1	EH38D5283522	EH38E3403144	dELS	dELS	EH38E3403144
peak_0074602	ATF3	Closing	Atf3	ATF3	known9.motif	chr8	42155025	42155126	AP3M2	-1.08914	0.00223812	intron (NM_006803, intron 2 of 8)	2013	gene_body	-0.354154	0.456203	0.354154	concordant_down	3	-3.92028	0.000169874	yes	gene_not_significant	TF_down	coherent_activation_loss	active_enhancer	0	1	1	1	1	0	0	0	2	2	2	9	yes	1	EH38D4087097	EH38E2627722	pELS	pELS	EH38E2627722
peak_0074602	FOSL1	Closing	Fra1	FOSL1	known4.motif	chr8	42155025	42155126	AP3M2	-1.08914	0.00223812	intron (NM_006803, intron 2 of 8)	2013	gene_body	-0.354154	0.456203	0.354154	concordant_down	3	-2.84522	0.0038438	yes	gene_not_significant	TF_down	coherent_activation_loss	active_enhancer	0	1	1	1	1	0	0	0	2	2	2	9	yes	1	EH38D4087097	EH38E2627722	pELS	pELS	EH38E2627722
peak_0013520	NFATC1	Closing	NFAT	NFATC1;NFATC2;NFATC3;NFATC4	known2.motif	chr11	65776293	65776510	AP5B1	-1.71274	0.00555901	3' UTR (NM_138368, exon 2 of 2)	4574	gene_body	-0.10496	1	0.10496	concordant_down	3	-0.764829	0.0475296	yes	gene_not_significant	TF_down	coherent_activation_loss	active_enhancer	0	1	0	1	1	0	0	1	2	2	2	9	yes	1	EH38D2460130	EH38E1545517	dELS	dELS	EH38E1545517
peak_0019956	NFATC1	Closing	NFAT	NFATC1;NFATC2;NFATC3;NFATC4	known2.motif	chr12	122993186	122993962	ARL6IP4	-1.38183	1.08046e-06	intron (NM_020845, intron 14 of 24)	13514	gene_body	-0.155762	1	0.155762	concordant_down	3	-0.764829	0.0475296	yes	gene_not_significant	TF_down	coherent_activation_loss	active_enhancer	0	1	1	1	1	0	0	1	2	2	2	9	yes	3	EH38D4738850	EH38E3047840	dELS	dELS	EH38E3047840;EH38E3047841;EH38E3047842
peak_0019956	NFKB1	Closing	NFkB-p65	NFKB1;RELA;RELB;NFKB2;REL	known10.motif	chr12	122993186	122993962	ARL6IP4	-1.38183	1.08046e-06	intron (NM_020845, intron 14 of 24)	13514	gene_body	-0.155762	1	0.155762	concordant_down	3	-1.24321	1.12356e-09	yes	gene_not_significant	TF_down	coherent_activation_loss	active_enhancer	0	1	1	1	1	0	0	1	2	2	2	9	yes	3	EH38D4738850	EH38E3047840	dELS	dELS	EH38E3047840;EH38E3047841;EH38E3047842
peak_0019956	NFKB1	Closing	NFkB-p50,p52	NFKB1;NFKB2	known13.motif	chr12	122993186	122993962	ARL6IP4	-1.38183	1.08046e-06	intron (NM_020845, intron 14 of 24)	13514	gene_body	-0.155762	1	0.155762	concordant_down	3	-1.24321	1.12356e-09	yes	gene_not_significant	TF_down	coherent_activation_loss	active_enhancer	0	1	1	1	1	0	0	1	2	2	2	9	yes	3	EH38D4738850	EH38E3047840	dELS	dELS	EH38E3047840;EH38E3047841;EH38E3047842
peak_0051416	ATF3	Closing	Atf3	ATF3	known9.motif	chr3	5139958	5140527	ARL8B	-1.26422	3.93419e-06	intron (NM_018184, intron 1 of 6)	17951	gene_body	-0.611631	0.00241596	0.611631	concordant_down	3	-3.92028	0.000169874	yes	gene_down	TF_down	coherent_activation_loss	active_enhancer	0	1	0	1	1	0	1	1	2	2	2	9	yes	1	EH38D5421910	EH38E3493121	dELS	dELS	EH38E3493121
peak_0051416	NFKB1	Closing	NFkB-p65	NFKB1;RELA;RELB;NFKB2;REL	known10.motif	chr3	5139958	5140527	ARL8B	-1.26422	3.93419e-06	intron (NM_018184, intron 1 of 6)	17951	gene_body	-0.611631	0.00241596	0.611631	concordant_down	3	-1.24321	1.12356e-09	yes	gene_down	TF_down	coherent_activation_loss	active_enhancer	0	1	0	1	1	0	1	1	2	2	2	9	yes	1	EH38D5421910	EH38E3493121	dELS	dELS	EH38E3493121
peak_0051416	NFKB1	Closing	NFkB-p50,p52	NFKB1;NFKB2	known13.motif	chr3	5139958	5140527	ARL8B	-1.26422	3.93419e-06	intron (NM_018184, intron 1 of 6)	17951	gene_body	-0.611631	0.00241596	0.611631	concordant_down	3	-1.24321	1.12356e-09	yes	gene_down	TF_down	coherent_activation_loss	active_enhancer	0	1	0	1	1	0	1	1	2	2	2	9	yes	1	EH38D5421910	EH38E3493121	dELS	dELS	EH38E3493121
peak_0082196	ATF3	Closing	Atf3	ATF3	known9.motif	chrX	102709044	102709322	ARMCX5-GPRASP2	-1.31456	0.00155281	intron (NR_146585, intron 2 of 6)	-2867	gene_body	-0.836985	1	0.836985	concordant_down	3	-3.92028	0.000169874	yes	gene_not_significant	TF_down	coherent_activation_loss	active_enhancer	0	1	0	1	1	1	0	0	2	2	2	9	yes	1	EH38D6121694	EH38E3939992	dELS	dELS	EH38E3939992
peak_0082196	FOSL1	Closing	Fra1	FOSL1	known4.motif	chrX	102709044	102709322	ARMCX5-GPRASP2	-1.31456	0.00155281	intron (NR_146585, intron 2 of 6)	-2867	gene_body	-0.836985	1	0.836985	concordant_down	3	-2.84522	0.0038438	yes	gene_not_significant	TF_down	coherent_activation_loss	active_enhancer	0	1	0	1	1	1	0	0	2	2	2	9	yes	1	EH38D6121694	EH38E3939992	dELS	dELS	EH38E3939992
peak_0082196	FOSL2	Closing	Fra2	FOSL2	known11.motif	chrX	102709044	102709322	ARMCX5-GPRASP2	-1.31456	0.00155281	intron (NR_146585, intron 2 of 6)	-2867	gene_body	-0.836985	1	0.836985	concordant_down	3	-2.94385	0.00157751	yes	gene_not_significant	TF_down	coherent_activation_loss	active_enhancer	0	1	0	1	1	1	0	0	2	2	2	9	yes	1	EH38D6121694	EH38E3939992	dELS	dELS	EH38E3939992
peak_0082196	FOSL2	Closing	Fosl2	FOSL2	known8.motif	chrX	102709044	102709322	ARMCX5-GPRASP2	-1.31456	0.00155281	intron (NR_146585, intron 2 of 6)	-2867	gene_body	-0.836985	1	0.836985	concordant_down	3	-2.94385	0.00157751	yes	gene_not_significant	TF_down	coherent_activation_loss	active_enhancer	0	1	0	1	1	1	0	0	2	2	2	9	yes	1	EH38D6121694	EH38E3939992	dELS	dELS	EH38E3939992
peak_0002389	ATF3	Closing	Atf3	ATF3	known9.motif	chr1	44693112	44693609	ARMH1	-1.71722	9.52667e-11	intron (NM_001145636, intron 2 of 11)	18647	gene_body	-0.346416	1	0.346416	concordant_down	3	-3.92028	0.000169874	yes	gene_not_significant	TF_down	coherent_activation_loss	active_enhancer	0	1	0	1	1	0	0	0	2	2	2	9	yes	1	EH38D2159664	EH38E1343570	dELS	dELS	EH38E1343570
peak_0002389	FOSL1	Closing	Fra1	FOSL1	known4.motif	chr1	44693112	44693609	ARMH1	-1.71722	9.52667e-11	intron (NM_001145636, intron 2 of 11)	18647	gene_body	-0.346416	1	0.346416	concordant_down	3	-2.84522	0.0038438	yes	gene_not_significant	TF_down	coherent_activation_loss	active_enhancer	0	1	0	1	1	0	0	0	2	2	2	9	yes	1	EH38D2159664	EH38E1343570	dELS	dELS	EH38E1343570
peak_0002389	FOSL2	Closing	Fra2	FOSL2	known11.motif	chr1	44693112	44693609	ARMH1	-1.71722	9.52667e-11	intron (NM_001145636, intron 2 of 11)	18647	gene_body	-0.346416	1	0.346416	concordant_down	3	-2.94385	0.00157751	yes	gene_not_significant	TF_down	coherent_activation_loss	active_enhancer	0	1	0	1	1	0	0	0	2	2	2	9	yes	1	EH38D2159664	EH38E1343570	dELS	dELS	EH38E1343570
peak_0002389	FOSL2	Closing	Fosl2	FOSL2	known8.motif	chr1	44693112	44693609	ARMH1	-1.71722	9.52667e-11	intron (NM_001145636, intron 2 of 11)	18647	gene_body	-0.346416	1	0.346416	concordant_down	3	-2.94385	0.00157751	yes	gene_not_significant	TF_down	coherent_activation_loss	active_enhancer	0	1	0	1	1	0	0	0	2	2	2	9	yes	1	EH38D2159664	EH38E1343570	dELS	dELS	EH38E1343570
peak_0002389	NFATC1	Closing	NFAT:AP1	NFATC1;NFATC2;NFATC3;NFATC4;JUN;FOS;BATF	known1.motif	chr1	44693112	44693609	ARMH1	-1.71722	9.52667e-11	intron (NM_001145636, intron 2 of 11)	18647	gene_body	-0.346416	1	0.346416	concordant_down	3	-0.764829	0.0475296	yes	gene_not_significant	TF_down	coherent_activation_loss	active_enhancer	0	1	0	1	1	0	0	0	2	2	2	9	yes	1	EH38D2159664	EH38E1343570	dELS	dELS	EH38E1343570
peak_0002389	NFATC1	Closing	NFAT	NFATC1;NFATC2;NFATC3;NFATC4	known2.motif	chr1	44693112	44693609	ARMH1	-1.71722	9.52667e-11	intron (NM_001145636, intron 2 of 11)	18647	gene_body	-0.346416	1	0.346416	concordant_down	3	-0.764829	0.0475296	yes	gene_not_significant	TF_down	coherent_activation_loss	active_enhancer	0	1	0	1	1	0	0	0	2	2	2	9	yes	1	EH38D2159664	EH38E1343570	dELS	dELS	EH38E1343570
peak_0016376	RFX5	Closing	Rfx5	RFX5	known108.motif	chr12	14417847	14418056	ATF7IP	-1.1922	0.000268377	intron (NM_181352, intron 1 of 14)	32671	gene_body	-0.264891	0.666827	0.264891	concordant_down	3	-0.493972	0.000101039	yes	gene_not_significant	TF_down	coherent_activation_loss	active_enhancer	0	1	0	1	1	0	0	0	2	2	2	9	yes	1	EH38D2532589	EH38E1594867	dELS	dELS	EH38E1594867
peak_0032035	NFATC1	Closing	NFAT	NFATC1;NFATC2;NFATC3;NFATC4	known2.motif	chr17	42457581	42457900	ATP6V0A1	-1.04997	0.000287535	Intergenic	-1137	distal	-1.10782	3.59137e-06	1.10782	concordant_down	3	-0.764829	0.0475296	yes	gene_down	TF_down	coherent_activation_loss	active_enhancer	0	0	1	1	1	0	0	0	2	2	2	9	yes	1	EH38D5012858	EH38E3224110	pELS	pELS	EH38E3224110
peak_0065094	NFATC1	Closing	NFAT	NFATC1;NFATC2;NFATC3;NFATC4	known2.motif	chr6	16657757	16658739	ATXN1	-1.05814	0.000186533	intron (NM_000332, intron 3 of 8)	101936	gene_body	-0.0933761	1	0.0933761	concordant_down	3	-0.764829	0.0475296	yes	gene_not_significant	TF_down	coherent_activation_loss	active_enhancer	0	1	1	1	1	0	0	0	2	2	2	9	yes	2	EH38D5733908	EH38E3693832	dELS	dELS	EH38E3693832;EH38E3693833
peak_0065094	NFKB1	Closing	NFkB-p65	NFKB1;RELA;RELB;NFKB2;REL	known10.motif	chr6	16657757	16658739	ATXN1	-1.05814	0.000186533	intron (NM_000332, intron 3 of 8)	101936	gene_body	-0.0933761	1	0.0933761	concordant_down	3	-1.24321	1.12356e-09	yes	gene_not_significant	TF_down	coherent_activation_loss	active_enhancer	0	1	1	1	1	0	0	0	2	2	2	9	yes	2	EH38D5733908	EH38E3693832	dELS	dELS	EH38E3693832;EH38E3693833
peak_0065094	NFKB1	Closing	NFkB-p50,p52	NFKB1;NFKB2	known13.motif	chr6	16657757	16658739	ATXN1	-1.05814	0.000186533	intron (NM_000332, intron 3 of 8)	101936	gene_body	-0.0933761	1	0.0933761	concordant_down	3	-1.24321	1.12356e-09	yes	gene_not_significant	TF_down	coherent_activation_loss	active_enhancer	0	1	1	1	1	0	0	0	2	2	2	9	yes	2	EH38D5733908	EH38E3693832	dELS	dELS	EH38E3693832;EH38E3693833
peak_0065099	ATF3	Closing	Atf3	ATF3	known9.motif	chr6	16685033	16685563	ATXN1	-1.39839	2.21102e-07	intron (NM_000332, intron 3 of 8)	74886	gene_body	-0.0933761	1	0.0933761	concordant_down	3	-3.92028	0.000169874	yes	gene_not_significant	TF_down	coherent_activation_loss	active_enhancer	0	1	1	1	1	0	0	0	2	2	2	9	yes	2	EH38D5733932	EH38E3693854	dELS	dELS	EH38E3693854;EH38E3693855
peak_0065099	EGR2	Closing	Egr2	EGR2	known16.motif	chr6	16685033	16685563	ATXN1	-1.39839	2.21102e-07	intron (NM_000332, intron 3 of 8)	74886	gene_body	-0.0933761	1	0.0933761	concordant_down	3	-5.0555	5.55296e-22	yes	gene_not_significant	TF_down	coherent_activation_loss	active_enhancer	0	1	1	1	1	0	0	0	2	2	2	9	yes	2	EH38D5733932	EH38E3693854	dELS	dELS	EH38E3693854;EH38E3693855
peak_0065099	FOSL1	Closing	Fra1	FOSL1	known4.motif	chr6	16685033	16685563	ATXN1	-1.39839	2.21102e-07	intron (NM_000332, intron 3 of 8)	74886	gene_body	-0.0933761	1	0.0933761	concordant_down	3	-2.84522	0.0038438	yes	gene_not_significant	TF_down	coherent_activation_loss	active_enhancer	0	1	1	1	1	0	0	0	2	2	2	9	yes	2	EH38D5733932	EH38E3693854	dELS	dELS	EH38E3693854;EH38E3693855
peak_0065099	IRF4	Closing	IRF4	IRF4	known28.motif	chr6	16685033	16685563	ATXN1	-1.39839	2.21102e-07	intron (NM_000332, intron 3 of 8)	74886	gene_body	-0.0933761	1	0.0933761	concordant_down	3	-1.96215	1.03297e-08	yes	gene_not_significant	TF_down	coherent_activation_loss	active_enhancer	0	1	1	1	1	0	0	0	2	2	2	9	yes	2	EH38D5733932	EH38E3693854	dELS	dELS	EH38E3693854;EH38E3693855
peak_0065099	NFATC1	Closing	NFAT:AP1	NFATC1;NFATC2;NFATC3;NFATC4;JUN;FOS;BATF	known1.motif	chr6	16685033	16685563	ATXN1	-1.39839	2.21102e-07	intron (NM_000332, intron 3 of 8)	74886	gene_body	-0.0933761	1	0.0933761	concordant_down	3	-0.764829	0.0475296	yes	gene_not_significant	TF_down	coherent_activation_loss	active_enhancer	0	1	1	1	1	0	0	0	2	2	2	9	yes	2	EH38D5733932	EH38E3693854	dELS	dELS	EH38E3693854;EH38E3693855
peak_0065099	NFKB1	Closing	NFkB-p65	NFKB1;RELA;RELB;NFKB2;REL	known10.motif	chr6	16685033	16685563	ATXN1	-1.39839	2.21102e-07	intron (NM_000332, intron 3 of 8)	74886	gene_body	-0.0933761	1	0.0933761	concordant_down	3	-1.24321	1.12356e-09	yes	gene_not_significant	TF_down	coherent_activation_loss	active_enhancer	0	1	1	1	1	0	0	0	2	2	2	9	yes	2	EH38D5733932	EH38E3693854	dELS	dELS	EH38E3693854;EH38E3693855
peak_0065099	NFKB1	Closing	NFkB-p50,p52	NFKB1;NFKB2	known13.motif	chr6	16685033	16685563	ATXN1	-1.39839	2.21102e-07	intron (NM_000332, intron 3 of 8)	74886	gene_body	-0.0933761	1	0.0933761	concordant_down	3	-1.24321	1.12356e-09	yes	gene_not_significant	TF_down	coherent_activation_loss	active_enhancer	0	1	1	1	1	0	0	0	2	2	2	9	yes	2	EH38D5733932	EH38E3693854	dELS	dELS	EH38E3693854;EH38E3693855
peak_0065100	ATF3	Closing	Atf3	ATF3	known9.motif	chr6	16690184	16691255	ATXN1	-1.70831	1.88121e-05	intron (NM_000332, intron 3 of 8)	69464	gene_body	-0.0933761	1	0.0933761	concordant_down	3	-3.92028	0.000169874	yes	gene_not_significant	TF_down	coherent_activation_loss	active_enhancer	0	1	0	1	1	0	0	0	2	2	2	9	yes	3	EH38D5733940	EH38E3693862	dELS	dELS	EH38E3693862;EH38E3693863;EH38E3693864
peak_0065100	FOSL1	Closing	Fra1	FOSL1	known4.motif	chr6	16690184	16691255	ATXN1	-1.70831	1.88121e-05	intron (NM_000332, intron 3 of 8)	69464	gene_body	-0.0933761	1	0.0933761	concordant_down	3	-2.84522	0.0038438	yes	gene_not_significant	TF_down	coherent_activation_loss	active_enhancer	0	1	0	1	1	0	0	0	2	2	2	9	yes	3	EH38D5733940	EH38E3693862	dELS	dELS	EH38E3693862;EH38E3693863;EH38E3693864
peak_0065100	FOSL2	Closing	Fra2	FOSL2	known11.motif	chr6	16690184	16691255	ATXN1	-1.70831	1.88121e-05	intron (NM_000332, intron 3 of 8)	69464	gene_body	-0.0933761	1	0.0933761	concordant_down	3	-2.94385	0.00157751	yes	gene_not_significant	TF_down	coherent_activation_loss	active_enhancer	0	1	0	1	1	0	0	0	2	2	2	9	yes	3	EH38D5733940	EH38E3693862	dELS	dELS	EH38E3693862;EH38E3693863;EH38E3693864
peak_0065100	NFATC1	Closing	NFAT:AP1	NFATC1;NFATC2;NFATC3;NFATC4;JUN;FOS;BATF	known1.motif	chr6	16690184	16691255	ATXN1	-1.70831	1.88121e-05	intron (NM_000332, intron 3 of 8)	69464	gene_body	-0.0933761	1	0.0933761	concordant_down	3	-0.764829	0.0475296	yes	gene_not_significant	TF_down	coherent_activation_loss	active_enhancer	0	1	0	1	1	0	0	0	2	2	2	9	yes	3	EH38D5733940	EH38E3693862	dELS	dELS	EH38E3693862;EH38E3693863;EH38E3693864
peak_0065100	NFATC1	Closing	NFAT	NFATC1;NFATC2;NFATC3;NFATC4	known2.motif	chr6	16690184	16691255	ATXN1	-1.70831	1.88121e-05	intron (NM_000332, intron 3 of 8)	69464	gene_body	-0.0933761	1	0.0933761	concordant_down	3	-0.764829	0.0475296	yes	gene_not_significant	TF_down	coherent_activation_loss	active_enhancer	0	1	0	1	1	0	0	0	2	2	2	9	yes	3	EH38D5733940	EH38E3693862	dELS	dELS	EH38E3693862;EH38E3693863;EH38E3693864
peak_0070214	ATF3	Closing	Atf3	ATF3	known9.motif	chr7	32506360	32506799	AVL9	-1.44797	6.75185e-05	intron (NM_015060, intron 1 of 15)	11091	gene_body	-0.327125	0.0211017	0.327125	concordant_down	3	-3.92028	0.000169874	yes	gene_down	TF_down	coherent_activation_loss	active_enhancer	0	1	1	1	1	0	0	0	2	2	2	9	yes	2	EH38D3963115	EH38E2546361	dELS	dELS	EH38E2546361;EH38E4432940
peak_0070214	FOSL1	Closing	Fra1	FOSL1	known4.motif	chr7	32506360	32506799	AVL9	-1.44797	6.75185e-05	intron (NM_015060, intron 1 of 15)	11091	gene_body	-0.327125	0.0211017	0.327125	concordant_down	3	-2.84522	0.0038438	yes	gene_down	TF_down	coherent_activation_loss	active_enhancer	0	1	1	1	1	0	0	0	2	2	2	9	yes	2	EH38D3963115	EH38E2546361	dELS	dELS	EH38E2546361;EH38E4432940
peak_0070214	FOSL2	Closing	Fra2	FOSL2	known11.motif	chr7	32506360	32506799	AVL9	-1.44797	6.75185e-05	intron (NM_015060, intron 1 of 15)	11091	gene_body	-0.327125	0.0211017	0.327125	concordant_down	3	-2.94385	0.00157751	yes	gene_down	TF_down	coherent_activation_loss	active_enhancer	0	1	1	1	1	0	0	0	2	2	2	9	yes	2	EH38D3963115	EH38E2546361	dELS	dELS	EH38E2546361;EH38E4432940
peak_0070214	IRF4	Closing	IRF4	IRF4	known28.motif	chr7	32506360	32506799	AVL9	-1.44797	6.75185e-05	intron (NM_015060, intron 1 of 15)	11091	gene_body	-0.327125	0.0211017	0.327125	concordant_down	3	-1.96215	1.03297e-08	yes	gene_down	TF_down	coherent_activation_loss	active_enhancer	0	1	1	1	1	0	0	0	2	2	2	9	yes	2	EH38D3963115	EH38E2546361	dELS	dELS	EH38E2546361;EH38E4432940
peak_0070214	NFATC1	Closing	NFAT:AP1	NFATC1;NFATC2;NFATC3;NFATC4;JUN;FOS;BATF	known1.motif	chr7	32506360	32506799	AVL9	-1.44797	6.75185e-05	intron (NM_015060, intron 1 of 15)	11091	gene_body	-0.327125	0.0211017	0.327125	concordant_down	3	-0.764829	0.0475296	yes	gene_down	TF_down	coherent_activation_loss	active_enhancer	0	1	1	1	1	0	0	0	2	2	2	9	yes	2	EH38D3963115	EH38E2546361	dELS	dELS	EH38E2546361;EH38E4432940
peak_0070214	NFATC1	Closing	NFAT	NFATC1;NFATC2;NFATC3;NFATC4	known2.motif	chr7	32506360	32506799	AVL9	-1.44797	6.75185e-05	intron (NM_015060, intron 1 of 15)	11091	gene_body	-0.327125	0.0211017	0.327125	concordant_down	3	-0.764829	0.0475296	yes	gene_down	TF_down	coherent_activation_loss	active_enhancer	0	1	1	1	1	0	0	0	2	2	2	9	yes	2	EH38D3963115	EH38E2546361	dELS	dELS	EH38E2546361;EH38E4432940
peak_0016590	ATF3	Closing	Atf3	ATF3	known9.motif	chr12	24919715	24919975	BCAT1	-1.32512	5.36152e-05	intron (NM_001178091, intron 1 of 9)	-16778	gene_body	-1.70826	0.655861	1.70826	concordant_down	3	-3.92028	0.000169874	yes	gene_not_significant	TF_down	coherent_activation_loss	active_enhancer	0	1	0	1	1	0	0	0	2	2	2	9	yes	1	EH38D4678643	EH38E3007689	dELS	dELS	EH38E3007689
peak_0016590	NFKB1	Closing	NFkB-p65	NFKB1;RELA;RELB;NFKB2;REL	known10.motif	chr12	24919715	24919975	BCAT1	-1.32512	5.36152e-05	intron (NM_001178091, intron 1 of 9)	-16778	gene_body	-1.70826	0.655861	1.70826	concordant_down	3	-1.24321	1.12356e-09	yes	gene_not_significant	TF_down	coherent_activation_loss	active_enhancer	0	1	0	1	1	0	0	0	2	2	2	9	yes	1	EH38D4678643	EH38E3007689	dELS	dELS	EH38E3007689
peak_0016590	NFKB1	Closing	NFkB-p50,p52	NFKB1;NFKB2	known13.motif	chr12	24919715	24919975	BCAT1	-1.32512	5.36152e-05	intron (NM_001178091, intron 1 of 9)	-16778	gene_body	-1.70826	0.655861	1.70826	concordant_down	3	-1.24321	1.12356e-09	yes	gene_not_significant	TF_down	coherent_activation_loss	active_enhancer	0	1	0	1	1	0	0	0	2	2	2	9	yes	1	EH38D4678643	EH38E3007689	dELS	dELS	EH38E3007689
peak_0035544	NFKB1	Closing	NFkB-p65	NFKB1;RELA;RELB;NFKB2;REL	known10.motif	chr18	63158982	63159187	BCL2	-1.40537	1.299e-06	intron (NM_000633, intron 2 of 2)	160295	gene_body	-0.0366147	1	0.0366147	concordant_down	3	-1.24321	1.12356e-09	yes	gene_not_significant	TF_down	coherent_activation_loss	active_enhancer	0	1	1	1	1	0	0	0	2	2	2	9	yes	1	EH38D5085035	EH38E3273381	pELS	pELS	EH38E3273381
peak_0035552	IRF4	Closing	IRF4	IRF4	known28.motif	chr18	63188165	63188348	BCL2	-1.21228	0.000607034	intron (NM_000633, intron 2 of 2)	131123	gene_body	-0.0366147	1	0.0366147	concordant_down	3	-1.96215	1.03297e-08	yes	gene_not_significant	TF_down	coherent_activation_loss	active_enhancer	0	1	0	1	1	0	0	0	2	2	2	9	yes	1	EH38D3018288	EH38E1923129	dELS	dELS	EH38E1923129
peak_0035571	NFATC1	Closing	NFAT	NFATC1;NFATC2;NFATC3;NFATC4	known2.motif	chr18	63290755	63291136	BCL2	-1.06613	0.00359697	intron (NM_000633, intron 2 of 2)	28434	gene_body	-0.0366147	1	0.0366147	concordant_down	3	-0.764829	0.0475296	yes	gene_not_significant	TF_down	coherent_activation_loss	active_enhancer	0	1	1	1	1	0	0	1	2	2	2	9	yes	2	EH38D5085188	EH38E3273521	dELS	dELS	EH38E3273521;EH38E3273522
peak_0019690	NFATC1	Closing	NFAT:AP1	NFATC1;NFATC2;NFATC3;NFATC4;JUN;FOS;BATF	known1.motif	chr12	120011977	120012650	BICDL1	-1.29561	8.62645e-13	intron (NR_147894, intron 3 of 8)	22470	gene_body	-0.639072	0.16051	0.639072	concordant_down	3	-0.764829	0.0475296	yes	gene_not_significant	TF_down	coherent_activation_loss	active_enhancer	0	1	1	1	1	0	0	0	2	2	2	9	yes	2	EH38D4735436	EH38E3045443	dELS	dELS	EH38E3045443;EH38E3045444
peak_0019690	NFATC1	Closing	NFAT	NFATC1;NFATC2;NFATC3;NFATC4	known2.motif	chr12	120011977	120012650	BICDL1	-1.29561	8.62645e-13	intron (NR_147894, intron 3 of 8)	22470	gene_body	-0.639072	0.16051	0.639072	concordant_down	3	-0.764829	0.0475296	yes	gene_not_significant	TF_down	coherent_activation_loss	active_enhancer	0	1	1	1	1	0	0	0	2	2	2	9	yes	2	EH38D4735436	EH38E3045443	dELS	dELS	EH38E3045443;EH38E3045444
peak_0019690	NFKB1	Closing	NFkB-p65	NFKB1;RELA;RELB;NFKB2;REL	known10.motif	chr12	120011977	120012650	BICDL1	-1.29561	8.62645e-13	intron (NR_147894, intron 3 of 8)	22470	gene_body	-0.639072	0.16051	0.639072	concordant_down	3	-1.24321	1.12356e-09	yes	gene_not_significant	TF_down	coherent_activation_loss	active_enhancer	0	1	1	1	1	0	0	0	2	2	2	9	yes	2	EH38D4735436	EH38E3045443	dELS	dELS	EH38E3045443;EH38E3045444
peak_0019690	RFX5	Closing	Rfx5	RFX5	known108.motif	chr12	120011977	120012650	BICDL1	-1.29561	8.62645e-13	intron (NR_147894, intron 3 of 8)	22470	gene_body	-0.639072	0.16051	0.639072	concordant_down	3	-0.493972	0.000101039	yes	gene_not_significant	TF_down	coherent_activation_loss	active_enhancer	0	1	1	1	1	0	0	0	2	2	2	9	yes	2	EH38D4735436	EH38E3045443	dELS	dELS	EH38E3045443;EH38E3045444
peak_0040516	ATF3	Closing	Atf3	ATF3	known9.motif	chr2	32423477	32423943	BIRC6	-1.11509	0.00451943	intron (NM_016252, intron 10 of 73)	66682	gene_body	-0.159954	1	0.159954	concordant_down	3	-3.92028	0.000169874	yes	gene_not_significant	TF_down	coherent_activation_loss	active_enhancer	0	1	0	1	1	0	0	0	2	2	2	9	yes	1	EH38D3106782	EH38E1985974	dELS	dELS	EH38E1985974
peak_0040516	FOSL1	Closing	Fra1	FOSL1	known4.motif	chr2	32423477	32423943	BIRC6	-1.11509	0.00451943	intron (NM_016252, intron 10 of 73)	66682	gene_body	-0.159954	1	0.159954	concordant_down	3	-2.84522	0.0038438	yes	gene_not_significant	TF_down	coherent_activation_loss	active_enhancer	0	1	0	1	1	0	0	0	2	2	2	9	yes	1	EH38D3106782	EH38E1985974	dELS	dELS	EH38E1985974
peak_0040516	IRF4	Closing	IRF4	IRF4	known28.motif	chr2	32423477	32423943	BIRC6	-1.11509	0.00451943	intron (NM_016252, intron 10 of 73)	66682	gene_body	-0.159954	1	0.159954	concordant_down	3	-1.96215	1.03297e-08	yes	gene_not_significant	TF_down	coherent_activation_loss	active_enhancer	0	1	0	1	1	0	0	0	2	2	2	9	yes	1	EH38D3106782	EH38E1985974	dELS	dELS	EH38E1985974
peak_0040516	NFATC1	Closing	NFAT:AP1	NFATC1;NFATC2;NFATC3;NFATC4;JUN;FOS;BATF	known1.motif	chr2	32423477	32423943	BIRC6	-1.11509	0.00451943	intron (NM_016252, intron 10 of 73)	66682	gene_body	-0.159954	1	0.159954	concordant_down	3	-0.764829	0.0475296	yes	gene_not_significant	TF_down	coherent_activation_loss	active_enhancer	0	1	0	1	1	0	0	0	2	2	2	9	yes	1	EH38D3106782	EH38E1985974	dELS	dELS	EH38E1985974
peak_0040516	NFATC1	Closing	NFAT	NFATC1;NFATC2;NFATC3;NFATC4	known2.motif	chr2	32423477	32423943	BIRC6	-1.11509	0.00451943	intron (NM_016252, intron 10 of 73)	66682	gene_body	-0.159954	1	0.159954	concordant_down	3	-0.764829	0.0475296	yes	gene_not_significant	TF_down	coherent_activation_loss	active_enhancer	0	1	0	1	1	0	0	0	2	2	2	9	yes	1	EH38D3106782	EH38E1985974	dELS	dELS	EH38E1985974
peak_0073671	ATF3	Closing	Atf3	ATF3	known9.motif	chr8	11527531	11527950	BLK	-1.065	0.0070333	intron (NM_001330465, intron 1 of 11).2	33354	gene_body	-0.0383639	1	0.0383639	concordant_down	3	-3.92028	0.000169874	yes	gene_not_significant	TF_down	coherent_activation_loss	active_enhancer	0	1	0	1	1	0	1	1	2	2	2	9	yes	1	EH38D4062117	EH38E2610821	dELS	dELS	EH38E2610821
peak_0073671	FOSL1	Closing	Fra1	FOSL1	known4.motif	chr8	11527531	11527950	BLK	-1.065	0.0070333	intron (NM_001330465, intron 1 of 11).2	33354	gene_body	-0.0383639	1	0.0383639	concordant_down	3	-2.84522	0.0038438	yes	gene_not_significant	TF_down	coherent_activation_loss	active_enhancer	0	1	0	1	1	0	1	1	2	2	2	9	yes	1	EH38D4062117	EH38E2610821	dELS	dELS	EH38E2610821
peak_0073671	FOSL2	Closing	Fra2	FOSL2	known11.motif	chr8	11527531	11527950	BLK	-1.065	0.0070333	intron (NM_001330465, intron 1 of 11).2	33354	gene_body	-0.0383639	1	0.0383639	concordant_down	3	-2.94385	0.00157751	yes	gene_not_significant	TF_down	coherent_activation_loss	active_enhancer	0	1	0	1	1	0	1	1	2	2	2	9	yes	1	EH38D4062117	EH38E2610821	dELS	dELS	EH38E2610821
peak_0073671	NFATC1	Closing	NFAT	NFATC1;NFATC2;NFATC3;NFATC4	known2.motif	chr8	11527531	11527950	BLK	-1.065	0.0070333	intron (NM_001330465, intron 1 of 11).2	33354	gene_body	-0.0383639	1	0.0383639	concordant_down	3	-0.764829	0.0475296	yes	gene_not_significant	TF_down	coherent_activation_loss	active_enhancer	0	1	0	1	1	0	1	1	2	2	2	9	yes	1	EH38D4062117	EH38E2610821	dELS	dELS	EH38E2610821
peak_0073671	TFE3	Closing	TFE3	TFE3	known133.motif	chr8	11527531	11527950	BLK	-1.065	0.0070333	intron (NM_001330465, intron 1 of 11).2	33354	gene_body	-0.0383639	1	0.0383639	concordant_down	3	-0.309485	0.00608454	yes	gene_not_significant	TF_down	coherent_activation_loss	active_enhancer	0	1	0	1	1	0	1	1	2	2	2	9	yes	1	EH38D4062117	EH38E2610821	dELS	dELS	EH38E2610821
peak_0037277	ATF3	Closing	Atf3	ATF3	known9.motif	chr19	15300712	15301303	BRD4	-2.16661	0.000274326	intron (NM_001330384, intron 1 of 11)	-20557	gene_body	-0.223084	0.270431	0.223084	concordant_down	3	-3.92028	0.000169874	yes	gene_not_significant	TF_down	coherent_activation_loss	active_enhancer	0	1	0	1	1	0	0	0	2	2	2	9	yes	3	EH38D5114268	EH38E3293342	dELS	dELS	EH38E3293342;EH38E3293343;EH38E3293344
peak_0037277	FOSL2	Closing	Fra2	FOSL2	known11.motif	chr19	15300712	15301303	BRD4	-2.16661	0.000274326	intron (NM_001330384, intron 1 of 11)	-20557	gene_body	-0.223084	0.270431	0.223084	concordant_down	3	-2.94385	0.00157751	yes	gene_not_significant	TF_down	coherent_activation_loss	active_enhancer	0	1	0	1	1	0	0	0	2	2	2	9	yes	3	EH38D5114268	EH38E3293342	dELS	dELS	EH38E3293342;EH38E3293343;EH38E3293344
peak_0037277	IRF4	Closing	IRF4	IRF4	known28.motif	chr19	15300712	15301303	BRD4	-2.16661	0.000274326	intron (NM_001330384, intron 1 of 11)	-20557	gene_body	-0.223084	0.270431	0.223084	concordant_down	3	-1.96215	1.03297e-08	yes	gene_not_significant	TF_down	coherent_activation_loss	active_enhancer	0	1	0	1	1	0	0	0	2	2	2	9	yes	3	EH38D5114268	EH38E3293342	dELS	dELS	EH38E3293342;EH38E3293343;EH38E3293344
peak_0037277	NFATC1	Closing	NFAT	NFATC1;NFATC2;NFATC3;NFATC4	known2.motif	chr19	15300712	15301303	BRD4	-2.16661	0.000274326	intron (NM_001330384, intron 1 of 11)	-20557	gene_body	-0.223084	0.270431	0.223084	concordant_down	3	-0.764829	0.0475296	yes	gene_not_significant	TF_down	coherent_activation_loss	active_enhancer	0	1	0	1	1	0	0	0	2	2	2	9	yes	3	EH38D5114268	EH38E3293342	dELS	dELS	EH38E3293342;EH38E3293343;EH38E3293344
peak_0037279	IRF4	Closing	IRF4	IRF4	known28.motif	chr19	15304139	15304557	BRD4	-1.22056	0.00060874	intron (NM_001330384, intron 1 of 11)	-23897	gene_body	-0.223084	0.270431	0.223084	concordant_down	3	-1.96215	1.03297e-08	yes	gene_not_significant	TF_down	coherent_activation_loss	active_enhancer	0	1	1	1	1	0	0	0	2	2	2	9	yes	2	EH38D3045139	EH38E1941835	dELS	dELS	EH38E1941835;EH38E1941836
peak_0037279	NFATC1	Closing	NFAT	NFATC1;NFATC2;NFATC3;NFATC4	known2.motif	chr19	15304139	15304557	BRD4	-1.22056	0.00060874	intron (NM_001330384, intron 1 of 11)	-23897	gene_body	-0.223084	0.270431	0.223084	concordant_down	3	-0.764829	0.0475296	yes	gene_not_significant	TF_down	coherent_activation_loss	active_enhancer	0	1	1	1	1	0	0	0	2	2	2	9	yes	2	EH38D3045139	EH38E1941835	dELS	dELS	EH38E1941835;EH38E1941836
peak_0070512	NFATC1	Closing	NFAT	NFATC1;NFATC2;NFATC3;NFATC4	known2.motif	chr7	44273966	44274479	CAMK2B	-1.01302	0.00278824	intron (NM_172081, intron 2 of 18)	51371	gene_body	-0.937897	0.907292	0.937897	concordant_down	3	-0.764829	0.0475296	yes	gene_not_significant	TF_down	coherent_activation_loss	active_enhancer	0	1	0	1	1	1	0	0	2	2	2	9	yes	2	EH38D5849980	EH38E3771197	dELS	dELS	EH38E3771197;EH38E3771198
peak_0058898	NFATC1	Closing	NFAT	NFATC1;NFATC2;NFATC3;NFATC4	known2.motif	chr4	113618348	113618542	CAMK2D	-1.67788	0.014945	intron (NM_001221, intron 3 of 18)	143293	gene_body	-0.418419	0.315992	0.418419	concordant_down	3	-0.764829	0.0475296	yes	gene_not_significant	TF_down	coherent_activation_loss	active_enhancer	0	1	0	1	1	0	0	0	2	2	2	9	yes	1	EH38D5589213	EH38E3600760	dELS	dELS	EH38E3600760
peak_0076451	ATF3	Closing	Atf3	ATF3	known9.motif	chr8	127698056	127698482	CASC11	-1.41158	0.0333852	Intergenic	35698	distal	-3.71044	1.12356e-09	3.71044	concordant_down	3	-3.92028	0.000169874	yes	gene_down	TF_down	coherent_activation_loss	active_enhancer	0	0	0	1	1	1	0	0	2	2	2	9	yes	2	EH38D5988589	EH38E3858695	dELS	dELS	EH38E3858695;EH38E3858696
peak_0076451	FOSL1	Closing	Fra1	FOSL1	known4.motif	chr8	127698056	127698482	CASC11	-1.41158	0.0333852	Intergenic	35698	distal	-3.71044	1.12356e-09	3.71044	concordant_down	3	-2.84522	0.0038438	yes	gene_down	TF_down	coherent_activation_loss	active_enhancer	0	0	0	1	1	1	0	0	2	2	2	9	yes	2	EH38D5988589	EH38E3858695	dELS	dELS	EH38E3858695;EH38E3858696
peak_0076451	FOSL2	Closing	Fra2	FOSL2	known11.motif	chr8	127698056	127698482	CASC11	-1.41158	0.0333852	Intergenic	35698	distal	-3.71044	1.12356e-09	3.71044	concordant_down	3	-2.94385	0.00157751	yes	gene_down	TF_down	coherent_activation_loss	active_enhancer	0	0	0	1	1	1	0	0	2	2	2	9	yes	2	EH38D5988589	EH38E3858695	dELS	dELS	EH38E3858695;EH38E3858696
peak_0076451	FOSL2	Closing	Fosl2	FOSL2	known8.motif	chr8	127698056	127698482	CASC11	-1.41158	0.0333852	Intergenic	35698	distal	-3.71044	1.12356e-09	3.71044	concordant_down	3	-2.94385	0.00157751	yes	gene_down	TF_down	coherent_activation_loss	active_enhancer	0	0	0	1	1	1	0	0	2	2	2	9	yes	2	EH38D5988589	EH38E3858695	dELS	dELS	EH38E3858695;EH38E3858696
peak_0076451	NFKB1	Closing	NFkB-p65	NFKB1;RELA;RELB;NFKB2;REL	known10.motif	chr8	127698056	127698482	CASC11	-1.41158	0.0333852	Intergenic	35698	distal	-3.71044	1.12356e-09	3.71044	concordant_down	3	-1.24321	1.12356e-09	yes	gene_down	TF_down	coherent_activation_loss	active_enhancer	0	0	0	1	1	1	0	0	2	2	2	9	yes	2	EH38D5988589	EH38E3858695	dELS	dELS	EH38E3858695;EH38E3858696
peak_0076439	ATF3	Closing	Atf3	ATF3	known9.motif	chr8	127472325	127472783	CASC8	-1.29737	0.000559775	intron (NR_024393, intron 4 of 4)	9585	gene_body	-1.16574	1	1.16574	concordant_down	3	-3.92028	0.000169874	yes	gene_not_significant	TF_down	coherent_activation_loss	active_enhancer	0	1	0	1	1	0	0	0	2	2	2	9	yes	1	EH38D4147324	EH38E2665961	dELS	dELS	EH38E2665961
peak_0076439	IRF4	Closing	IRF4	IRF4	known28.motif	chr8	127472325	127472783	CASC8	-1.29737	0.000559775	intron (NR_024393, intron 4 of 4)	9585	gene_body	-1.16574	1	1.16574	concordant_down	3	-1.96215	1.03297e-08	yes	gene_not_significant	TF_down	coherent_activation_loss	active_enhancer	0	1	0	1	1	0	0	0	2	2	2	9	yes	1	EH38D4147324	EH38E2665961	dELS	dELS	EH38E2665961
peak_0076439	NFATC1	Closing	NFAT:AP1	NFATC1;NFATC2;NFATC3;NFATC4;JUN;FOS;BATF	known1.motif	chr8	127472325	127472783	CASC8	-1.29737	0.000559775	intron (NR_024393, intron 4 of 4)	9585	gene_body	-1.16574	1	1.16574	concordant_down	3	-0.764829	0.0475296	yes	gene_not_significant	TF_down	coherent_activation_loss	active_enhancer	0	1	0	1	1	0	0	0	2	2	2	9	yes	1	EH38D4147324	EH38E2665961	dELS	dELS	EH38E2665961
peak_0047978	RFX5	Closing	Rfx5	RFX5	known108.motif	chr20	56433906	56434172	CASS4	-1.15286	0.000343342	intron (NM_001164116, intron 2 of 6)	21779	gene_body	-0.362803	1	0.362803	concordant_down	3	-0.493972	0.000101039	yes	gene_not_significant	TF_down	coherent_activation_loss	active_enhancer	0	1	0	1	1	0	0	0	2	2	2	9	yes	1	EH38D3314087	EH38E2123573	dELS	dELS	EH38E2123573
peak_0016741	IRF4	Closing	IRF4	IRF4	known28.motif	chr12	28189169	28189378	CCDC91	-1.588	0.0231331	non-coding (NR_148936, exon 1 of 1)	-1182	gene_body	-0.241221	0.742405	0.241221	concordant_down	3	-1.96215	1.03297e-08	yes	gene_not_significant	TF_down	coherent_activation_loss	active_enhancer	0	1	1	1	1	0	0	0	2	2	2	9	yes	1	EH38D4680534	EH38E3009138	pELS	pELS	EH38E3009138
peak_0016741	NFATC1	Closing	NFAT:AP1	NFATC1;NFATC2;NFATC3;NFATC4;JUN;FOS;BATF	known1.motif	chr12	28189169	28189378	CCDC91	-1.588	0.0231331	non-coding (NR_148936, exon 1 of 1)	-1182	gene_body	-0.241221	0.742405	0.241221	concordant_down	3	-0.764829	0.0475296	yes	gene_not_significant	TF_down	coherent_activation_loss	active_enhancer	0	1	1	1	1	0	0	0	2	2	2	9	yes	1	EH38D4680534	EH38E3009138	pELS	pELS	EH38E3009138
peak_0016741	NFATC1	Closing	NFAT	NFATC1;NFATC2;NFATC3;NFATC4	known2.motif	chr12	28189169	28189378	CCDC91	-1.588	0.0231331	non-coding (NR_148936, exon 1 of 1)	-1182	gene_body	-0.241221	0.742405	0.241221	concordant_down	3	-0.764829	0.0475296	yes	gene_not_significant	TF_down	coherent_activation_loss	active_enhancer	0	1	1	1	1	0	0	0	2	2	2	9	yes	1	EH38D4680534	EH38E3009138	pELS	pELS	EH38E3009138
peak_0031800	ATF3	Closing	Atf3	ATF3	known9.motif	chr17	39486879	39487572	CDK12	-1.36084	0.0470955	intron (NM_015083, intron 2 of 13)	25740	gene_body	-0.417881	0.0319748	0.417881	concordant_down	3	-3.92028	0.000169874	yes	gene_down	TF_down	coherent_activation_loss	active_enhancer	0	1	0	1	1	0	0	0	2	2	2	9	yes	2	EH38D2929307	EH38E1860855	dELS	dELS	EH38E1860855;EH38E3221566
peak_0031800	IRF4	Closing	IRF4	IRF4	known28.motif	chr17	39486879	39487572	CDK12	-1.36084	0.0470955	intron (NM_015083, intron 2 of 13)	25740	gene_body	-0.417881	0.0319748	0.417881	concordant_down	3	-1.96215	1.03297e-08	yes	gene_down	TF_down	coherent_activation_loss	active_enhancer	0	1	0	1	1	0	0	0	2	2	2	9	yes	2	EH38D2929307	EH38E1860855	dELS	dELS	EH38E1860855;EH38E3221566
peak_0031800	NFATC1	Closing	NFAT	NFATC1;NFATC2;NFATC3;NFATC4	known2.motif	chr17	39486879	39487572	CDK12	-1.36084	0.0470955	intron (NM_015083, intron 2 of 13)	25740	gene_body	-0.417881	0.0319748	0.417881	concordant_down	3	-0.764829	0.0475296	yes	gene_down	TF_down	coherent_activation_loss	active_enhancer	0	1	0	1	1	0	0	0	2	2	2	9	yes	2	EH38D2929307	EH38E1860855	dELS	dELS	EH38E1860855;EH38E3221566
peak_0031800	RFX5	Closing	Rfx5	RFX5	known108.motif	chr17	39486879	39487572	CDK12	-1.36084	0.0470955	intron (NM_015083, intron 2 of 13)	25740	gene_body	-0.417881	0.0319748	0.417881	concordant_down	3	-0.493972	0.000101039	yes	gene_down	TF_down	coherent_activation_loss	active_enhancer	0	1	0	1	1	0	0	0	2	2	2	9	yes	2	EH38D2929307	EH38E1860855	dELS	dELS	EH38E1860855;EH38E3221566
peak_0071400	ATF3	Closing	Atf3	ATF3	known9.motif	chr7	90613119	90613750	CDK14	-1.08826	7.55343e-05	intron (NM_001287135, intron 2 of 14)	17114	gene_body	-0.0813009	1	0.0813009	concordant_down	3	-3.92028	0.000169874	yes	gene_not_significant	TF_down	coherent_activation_loss	active_enhancer	0	1	1	1	1	0	0	0	2	2	2	9	yes	2	EH38D5873411	EH38E3785068	dELS	dELS	EH38E3785068;EH38E3785069
peak_0071400	FOSL1	Closing	Fra1	FOSL1	known4.motif	chr7	90613119	90613750	CDK14	-1.08826	7.55343e-05	intron (NM_001287135, intron 2 of 14)	17114	gene_body	-0.0813009	1	0.0813009	concordant_down	3	-2.84522	0.0038438	yes	gene_not_significant	TF_down	coherent_activation_loss	active_enhancer	0	1	1	1	1	0	0	0	2	2	2	9	yes	2	EH38D5873411	EH38E3785068	dELS	dELS	EH38E3785068;EH38E3785069
peak_0071400	NFATC1	Closing	NFAT:AP1	NFATC1;NFATC2;NFATC3;NFATC4;JUN;FOS;BATF	known1.motif	chr7	90613119	90613750	CDK14	-1.08826	7.55343e-05	intron (NM_001287135, intron 2 of 14)	17114	gene_body	-0.0813009	1	0.0813009	concordant_down	3	-0.764829	0.0475296	yes	gene_not_significant	TF_down	coherent_activation_loss	active_enhancer	0	1	1	1	1	0	0	0	2	2	2	9	yes	2	EH38D5873411	EH38E3785068	dELS	dELS	EH38E3785068;EH38E3785069
peak_0071400	NFATC1	Closing	NFAT	NFATC1;NFATC2;NFATC3;NFATC4	known2.motif	chr7	90613119	90613750	CDK14	-1.08826	7.55343e-05	intron (NM_001287135, intron 2 of 14)	17114	gene_body	-0.0813009	1	0.0813009	concordant_down	3	-0.764829	0.0475296	yes	gene_not_significant	TF_down	coherent_activation_loss	active_enhancer	0	1	1	1	1	0	0	0	2	2	2	9	yes	2	EH38D5873411	EH38E3785068	dELS	dELS	EH38E3785068;EH38E3785069
peak_0071415	NFATC1	Closing	NFAT	NFATC1;NFATC2;NFATC3;NFATC4	known2.motif	chr7	90739835	90740059	CDK14	-1.31605	0.000681614	intron (NM_001287137, intron 2 of 12)	30131	gene_body	-0.0813009	1	0.0813009	concordant_down	3	-0.764829	0.0475296	yes	gene_not_significant	TF_down	coherent_activation_loss	active_enhancer	0	1	1	1	1	0	0	1	2	2	2	9	yes	1	EH38D4000742	EH38E2570562	dELS	dELS	EH38E2570562
peak_0071422	NFATC1	Closing	NFAT	NFATC1;NFATC2;NFATC3;NFATC4	known2.motif	chr7	90791644	90791935	CDK14	-1.7415	0.000964465	intron (NM_012395, intron 4 of 13)	81974	gene_body	-0.0813009	1	0.0813009	concordant_down	3	-0.764829	0.0475296	yes	gene_not_significant	TF_down	coherent_activation_loss	active_enhancer	0	1	0	1	1	0	1	1	2	2	2	9	no	0	.	.	none	.	.
peak_0065201	IRF4	Closing	IRF4	IRF4	known28.motif	chr6	20716852	20717250	CDKAL1	-1.1552	0.00861815	intron (NM_017774, intron 5 of 15)	182594	gene_body	-0.34607	0.13792	0.34607	concordant_down	3	-1.96215	1.03297e-08	yes	gene_not_significant	TF_down	coherent_activation_loss	active_enhancer	0	1	0	1	1	0	0	0	2	2	2	9	yes	1	EH38D5736271	EH38E3695520	dELS	dELS	EH38E3695520
peak_0077451	ATF3	Closing	Atf3	ATF3	known9.motif	chr9	22147914	22148505	CDKN2B	-1.10962	2.54735e-07	Intergenic	-138897	distal	-1.6697	0.0301703	1.6697	concordant_down	3	-3.92028	0.000169874	yes	gene_down	TF_down	coherent_activation_loss	active_enhancer	0	0	0	1	1	0	0	0	2	2	2	9	yes	2	EH38D4180024	EH38E2687430	dELS	dELS	EH38E2687430;EH38E3878092
peak_0077451	FOSL1	Closing	Fra1	FOSL1	known4.motif	chr9	22147914	22148505	CDKN2B	-1.10962	2.54735e-07	Intergenic	-138897	distal	-1.6697	0.0301703	1.6697	concordant_down	3	-2.84522	0.0038438	yes	gene_down	TF_down	coherent_activation_loss	active_enhancer	0	0	0	1	1	0	0	0	2	2	2	9	yes	2	EH38D4180024	EH38E2687430	dELS	dELS	EH38E2687430;EH38E3878092
peak_0077451	FOSL2	Closing	Fra2	FOSL2	known11.motif	chr9	22147914	22148505	CDKN2B	-1.10962	2.54735e-07	Intergenic	-138897	distal	-1.6697	0.0301703	1.6697	concordant_down	3	-2.94385	0.00157751	yes	gene_down	TF_down	coherent_activation_loss	active_enhancer	0	0	0	1	1	0	0	0	2	2	2	9	yes	2	EH38D4180024	EH38E2687430	dELS	dELS	EH38E2687430;EH38E3878092
peak_0077451	FOSL2	Closing	Fosl2	FOSL2	known8.motif	chr9	22147914	22148505	CDKN2B	-1.10962	2.54735e-07	Intergenic	-138897	distal	-1.6697	0.0301703	1.6697	concordant_down	3	-2.94385	0.00157751	yes	gene_down	TF_down	coherent_activation_loss	active_enhancer	0	0	0	1	1	0	0	0	2	2	2	9	yes	2	EH38D4180024	EH38E2687430	dELS	dELS	EH38E2687430;EH38E3878092
peak_0077451	NFATC1	Closing	NFAT	NFATC1;NFATC2;NFATC3;NFATC4	known2.motif	chr9	22147914	22148505	CDKN2B	-1.10962	2.54735e-07	Intergenic	-138897	distal	-1.6697	0.0301703	1.6697	concordant_down	3	-0.764829	0.0475296	yes	gene_down	TF_down	coherent_activation_loss	active_enhancer	0	0	0	1	1	0	0	0	2	2	2	9	yes	2	EH38D4180024	EH38E2687430	dELS	dELS	EH38E2687430;EH38E3878092
peak_0077451	NFKB1	Closing	NFkB-p65	NFKB1;RELA;RELB;NFKB2;REL	known10.motif	chr9	22147914	22148505	CDKN2B	-1.10962	2.54735e-07	Intergenic	-138897	distal	-1.6697	0.0301703	1.6697	concordant_down	3	-1.24321	1.12356e-09	yes	gene_down	TF_down	coherent_activation_loss	active_enhancer	0	0	0	1	1	0	0	0	2	2	2	9	yes	2	EH38D4180024	EH38E2687430	dELS	dELS	EH38E2687430;EH38E3878092
peak_0027346	ATF3	Closing	Atf3	ATF3	known9.motif	chr15	101199460	101200164	CHSY1	-1.37278	3.35761e-05	intron (NM_014918, intron 2 of 2)	52236	gene_body	-0.291847	0.124362	0.291847	concordant_down	3	-3.92028	0.000169874	yes	gene_not_significant	TF_down	coherent_activation_loss	active_enhancer	0	1	1	1	1	1	0	0	2	2	2	9	yes	2	EH38D2833491	EH38E1793826	dELS	dELS	EH38E1793826;EH38E3159429
peak_0027346	FOSL1	Closing	Fra1	FOSL1	known4.motif	chr15	101199460	101200164	CHSY1	-1.37278	3.35761e-05	intron (NM_014918, intron 2 of 2)	52236	gene_body	-0.291847	0.124362	0.291847	concordant_down	3	-2.84522	0.0038438	yes	gene_not_significant	TF_down	coherent_activation_loss	active_enhancer	0	1	1	1	1	1	0	0	2	2	2	9	yes	2	EH38D2833491	EH38E1793826	dELS	dELS	EH38E1793826;EH38E3159429
peak_0027346	FOSL2	Closing	Fra2	FOSL2	known11.motif	chr15	101199460	101200164	CHSY1	-1.37278	3.35761e-05	intron (NM_014918, intron 2 of 2)	52236	gene_body	-0.291847	0.124362	0.291847	concordant_down	3	-2.94385	0.00157751	yes	gene_not_significant	TF_down	coherent_activation_loss	active_enhancer	0	1	1	1	1	1	0	0	2	2	2	9	yes	2	EH38D2833491	EH38E1793826	dELS	dELS	EH38E1793826;EH38E3159429
peak_0027346	FOSL2	Closing	Fosl2	FOSL2	known8.motif	chr15	101199460	101200164	CHSY1	-1.37278	3.35761e-05	intron (NM_014918, intron 2 of 2)	52236	gene_body	-0.291847	0.124362	0.291847	concordant_down	3	-2.94385	0.00157751	yes	gene_not_significant	TF_down	coherent_activation_loss	active_enhancer	0	1	1	1	1	1	0	0	2	2	2	9	yes	2	EH38D2833491	EH38E1793826	dELS	dELS	EH38E1793826;EH38E3159429
peak_0027346	NFATC1	Closing	NFAT:AP1	NFATC1;NFATC2;NFATC3;NFATC4;JUN;FOS;BATF	known1.motif	chr15	101199460	101200164	CHSY1	-1.37278	3.35761e-05	intron (NM_014918, intron 2 of 2)	52236	gene_body	-0.291847	0.124362	0.291847	concordant_down	3	-0.764829	0.0475296	yes	gene_not_significant	TF_down	coherent_activation_loss	active_enhancer	0	1	1	1	1	1	0	0	2	2	2	9	yes	2	EH38D2833491	EH38E1793826	dELS	dELS	EH38E1793826;EH38E3159429
peak_0037247	NFATC1	Closing	NFAT:AP1	NFATC1;NFATC2;NFATC3;NFATC4;JUN;FOS;BATF	known1.motif	chr19	14601172	14601387	CLEC17A	-1.07195	0.00101483	intron (NM_207390, intron 12 of 12)	18196	gene_body	-0.142827	1	0.142827	concordant_down	3	-0.764829	0.0475296	yes	gene_not_significant	TF_down	coherent_activation_loss	active_enhancer	0	1	0	1	1	0	0	1	2	2	2	9	no	0	.	.	none	.	.
peak_0037247	NFATC1	Closing	NFAT	NFATC1;NFATC2;NFATC3;NFATC4	known2.motif	chr19	14601172	14601387	CLEC17A	-1.07195	0.00101483	intron (NM_207390, intron 12 of 12)	18196	gene_body	-0.142827	1	0.142827	concordant_down	3	-0.764829	0.0475296	yes	gene_not_significant	TF_down	coherent_activation_loss	active_enhancer	0	1	0	1	1	0	0	1	2	2	2	9	no	0	.	.	none	.	.
peak_0072937	ATF3	Closing	Atf3	ATF3	known9.motif	chr7	141945351	141945954	CLEC5A	-1.60797	3.65437e-05	intron (NM_013252, intron 2 of 6)	1321	gene_body	-2.38942	1	2.38942	concordant_down	3	-3.92028	0.000169874	yes	gene_not_significant	TF_down	coherent_activation_loss	active_enhancer	0	1	0	1	1	1	0	0	2	2	2	9	yes	2	EH38D5903910	EH38E3804969	pELS	pELS	EH38E3804969;EH38E3804970
peak_0072937	FOSL1	Closing	Fra1	FOSL1	known4.motif	chr7	141945351	141945954	CLEC5A	-1.60797	3.65437e-05	intron (NM_013252, intron 2 of 6)	1321	gene_body	-2.38942	1	2.38942	concordant_down	3	-2.84522	0.0038438	yes	gene_not_significant	TF_down	coherent_activation_loss	active_enhancer	0	1	0	1	1	1	0	0	2	2	2	9	yes	2	EH38D5903910	EH38E3804969	pELS	pELS	EH38E3804969;EH38E3804970
peak_0072937	FOSL2	Closing	Fra2	FOSL2	known11.motif	chr7	141945351	141945954	CLEC5A	-1.60797	3.65437e-05	intron (NM_013252, intron 2 of 6)	1321	gene_body	-2.38942	1	2.38942	concordant_down	3	-2.94385	0.00157751	yes	gene_not_significant	TF_down	coherent_activation_loss	active_enhancer	0	1	0	1	1	1	0	0	2	2	2	9	yes	2	EH38D5903910	EH38E3804969	pELS	pELS	EH38E3804969;EH38E3804970
peak_0072937	FOSL2	Closing	Fosl2	FOSL2	known8.motif	chr7	141945351	141945954	CLEC5A	-1.60797	3.65437e-05	intron (NM_013252, intron 2 of 6)	1321	gene_body	-2.38942	1	2.38942	concordant_down	3	-2.94385	0.00157751	yes	gene_not_significant	TF_down	coherent_activation_loss	active_enhancer	0	1	0	1	1	1	0	0	2	2	2	9	yes	2	EH38D5903910	EH38E3804969	pELS	pELS	EH38E3804969;EH38E3804970
peak_0072937	IRF4	Closing	IRF4	IRF4	known28.motif	chr7	141945351	141945954	CLEC5A	-1.60797	3.65437e-05	intron (NM_013252, intron 2 of 6)	1321	gene_body	-2.38942	1	2.38942	concordant_down	3	-1.96215	1.03297e-08	yes	gene_not_significant	TF_down	coherent_activation_loss	active_enhancer	0	1	0	1	1	1	0	0	2	2	2	9	yes	2	EH38D5903910	EH38E3804969	pELS	pELS	EH38E3804969;EH38E3804970
peak_0007765	NFKB1	Closing	NFkB-p65	NFKB1;RELA;RELB;NFKB2;REL	known10.motif	chr1	246591311	246591854	CNST	-1.31981	0.00397908	exon (NM_001139459, exon 2 of 9)	25127	gene_body	-0.0465362	1	0.0465362	concordant_down	3	-1.24321	1.12356e-09	yes	gene_not_significant	TF_down	coherent_activation_loss	active_enhancer	0	1	0	1	1	0	0	1	2	2	2	9	yes	2	EH38D2302566	EH38E1439971	dELS	dELS	EH38E1439971;EH38E1439972
peak_0022094	NFKB1	Closing	NFkB-p65	NFKB1;RELA;RELB;NFKB2;REL	known10.motif	chr13	110447073	110447204	COL4A2-AS2	-1.40571	0.000561491	intron (NM_001846, intron 18 of 47)	16148	gene_body	-0.476315	1	0.476315	concordant_down	3	-1.24321	1.12356e-09	yes	gene_not_significant	TF_down	coherent_activation_loss	active_enhancer	0	1	0	1	1	1	0	0	2	2	2	9	yes	1	EH38D4793563	EH38E3081650	dELS	dELS	EH38E3081650
peak_0072778	NFATC1	Closing	NFAT	NFATC1;NFATC2;NFATC3;NFATC4	known2.motif	chr7	137960162	137960387	CREB3L2-AS1	-1.69043	3.78012e-07	intron (NM_001253775, intron 1 of 3)	6927	gene_body	-1.10284	1	1.10284	concordant_down	3	-0.764829	0.0475296	yes	gene_not_significant	TF_down	coherent_activation_loss	active_enhancer	0	1	0	1	1	0	0	0	2	2	2	9	yes	1	EH38D4037261	EH38E2594727	dELS	dELS	EH38E2594727
peak_0062312	ATF3	Closing	Atf3	ATF3	known9.motif	chr5	123597976	123598658	CSNK1G3	-1.55487	0.0278178	intron (NM_001044723, intron 10 of 12)	52900	gene_body	-0.204331	0.665492	0.204331	concordant_down	3	-3.92028	0.000169874	yes	gene_not_significant	TF_down	coherent_activation_loss	active_enhancer	0	1	0	1	1	0	0	1	2	2	2	9	yes	1	EH38D3752686	EH38E4379750	TF	TF	EH38E4379750
peak_0062312	FOSL1	Closing	Fra1	FOSL1	known4.motif	chr5	123597976	123598658	CSNK1G3	-1.55487	0.0278178	intron (NM_001044723, intron 10 of 12)	52900	gene_body	-0.204331	0.665492	0.204331	concordant_down	3	-2.84522	0.0038438	yes	gene_not_significant	TF_down	coherent_activation_loss	active_enhancer	0	1	0	1	1	0	0	1	2	2	2	9	yes	1	EH38D3752686	EH38E4379750	TF	TF	EH38E4379750
peak_0062312	FOSL2	Closing	Fra2	FOSL2	known11.motif	chr5	123597976	123598658	CSNK1G3	-1.55487	0.0278178	intron (NM_001044723, intron 10 of 12)	52900	gene_body	-0.204331	0.665492	0.204331	concordant_down	3	-2.94385	0.00157751	yes	gene_not_significant	TF_down	coherent_activation_loss	active_enhancer	0	1	0	1	1	0	0	1	2	2	2	9	yes	1	EH38D3752686	EH38E4379750	TF	TF	EH38E4379750
peak_0062312	FOSL2	Closing	Fosl2	FOSL2	known8.motif	chr5	123597976	123598658	CSNK1G3	-1.55487	0.0278178	intron (NM_001044723, intron 10 of 12)	52900	gene_body	-0.204331	0.665492	0.204331	concordant_down	3	-2.94385	0.00157751	yes	gene_not_significant	TF_down	coherent_activation_loss	active_enhancer	0	1	0	1	1	0	0	1	2	2	2	9	yes	1	EH38D3752686	EH38E4379750	TF	TF	EH38E4379750
peak_0062312	NFATC1	Closing	NFAT:AP1	NFATC1;NFATC2;NFATC3;NFATC4;JUN;FOS;BATF	known1.motif	chr5	123597976	123598658	CSNK1G3	-1.55487	0.0278178	intron (NM_001044723, intron 10 of 12)	52900	gene_body	-0.204331	0.665492	0.204331	concordant_down	3	-0.764829	0.0475296	yes	gene_not_significant	TF_down	coherent_activation_loss	active_enhancer	0	1	0	1	1	0	0	1	2	2	2	9	yes	1	EH38D3752686	EH38E4379750	TF	TF	EH38E4379750
peak_0062312	NFATC1	Closing	NFAT	NFATC1;NFATC2;NFATC3;NFATC4	known2.motif	chr5	123597976	123598658	CSNK1G3	-1.55487	0.0278178	intron (NM_001044723, intron 10 of 12)	52900	gene_body	-0.204331	0.665492	0.204331	concordant_down	3	-0.764829	0.0475296	yes	gene_not_significant	TF_down	coherent_activation_loss	active_enhancer	0	1	0	1	1	0	0	1	2	2	2	9	yes	1	EH38D3752686	EH38E4379750	TF	TF	EH38E4379750
peak_0062312	NFE2L2	Closing	NFE2L2	NFE2L2	known62.motif	chr5	123597976	123598658	CSNK1G3	-1.55487	0.0278178	intron (NM_001044723, intron 10 of 12)	52900	gene_body	-0.204331	0.665492	0.204331	concordant_down	3	-0.799869	0.00280392	yes	gene_not_significant	TF_down	coherent_activation_loss	active_enhancer	0	1	0	1	1	0	0	1	2	2	2	9	yes	1	EH38D3752686	EH38E4379750	TF	TF	EH38E4379750
peak_0062312	NFKB1	Closing	NFkB-p65	NFKB1;RELA;RELB;NFKB2;REL	known10.motif	chr5	123597976	123598658	CSNK1G3	-1.55487	0.0278178	intron (NM_001044723, intron 10 of 12)	52900	gene_body	-0.204331	0.665492	0.204331	concordant_down	3	-1.24321	1.12356e-09	yes	gene_not_significant	TF_down	coherent_activation_loss	active_enhancer	0	1	0	1	1	0	0	1	2	2	2	9	yes	1	EH38D3752686	EH38E4379750	TF	TF	EH38E4379750
peak_0059607	NFATC1	Closing	NFAT	NFATC1;NFATC2;NFATC3;NFATC4	known2.motif	chr4	154427355	154427499	DCHS2	-1.42025	0.0133635	intron (NM_001358235, intron 1 of 19)	64372	gene_body	-0.476315	1	0.476315	concordant_down	3	-0.764829	0.0475296	yes	gene_not_significant	TF_down	coherent_activation_loss	active_enhancer	0	1	0	1	1	1	1	0	2	2	2	9	yes	1	EH38D5606620	EH38E3611460	CA-H3K4me3	CA-H3K4me3	EH38E3611460
peak_0014679	NFATC1	Closing	NFAT	NFATC1;NFATC2;NFATC3;NFATC4	known2.motif	chr11	103070209	103070747	DCUN1D5	-1.26201	1.69103e-05	intron (NM_001318740, intron 3 of 6)	21682	gene_body	-0.942988	1.17865e-05	0.942988	concordant_down	3	-0.764829	0.0475296	yes	gene_down	TF_down	coherent_activation_loss	active_enhancer	0	1	1	1	1	0	0	0	2	2	2	9	yes	1	EH38D4639536	EH38E2981639	dELS	dELS	EH38E2981639
peak_0013893	NFATC1	Closing	NFAT	NFATC1;NFATC2;NFATC3;NFATC4	known2.motif	chr11	71869802	71871083	DEFB131B	-1.2048	0.000165099	intron (NR_029192, intron 6 of 6)	-8010	gene_body	-0.0773579	1	0.0773579	concordant_down	3	-0.764829	0.0475296	yes	gene_not_significant	TF_down	coherent_activation_loss	active_enhancer	0	1	0	1	1	0	0	0	2	2	2	9	yes	3	EH38D2466738	EH38E1550341	dELS	dELS	EH38E1550341;EH38E2970577;EH38E4041393
peak_0013893	NFKB1	Closing	NFkB-p65	NFKB1;RELA;RELB;NFKB2;REL	known10.motif	chr11	71869802	71871083	DEFB131B	-1.2048	0.000165099	intron (NR_029192, intron 6 of 6)	-8010	gene_body	-0.0773579	1	0.0773579	concordant_down	3	-1.24321	1.12356e-09	yes	gene_not_significant	TF_down	coherent_activation_loss	active_enhancer	0	1	0	1	1	0	0	0	2	2	2	9	yes	3	EH38D2466738	EH38E1550341	dELS	dELS	EH38E1550341;EH38E2970577;EH38E4041393
peak_0013893	NFKB1	Closing	NFkB-p50,p52	NFKB1;NFKB2	known13.motif	chr11	71869802	71871083	DEFB131B	-1.2048	0.000165099	intron (NR_029192, intron 6 of 6)	-8010	gene_body	-0.0773579	1	0.0773579	concordant_down	3	-1.24321	1.12356e-09	yes	gene_not_significant	TF_down	coherent_activation_loss	active_enhancer	0	1	0	1	1	0	0	0	2	2	2	9	yes	3	EH38D2466738	EH38E1550341	dELS	dELS	EH38E1550341;EH38E2970577;EH38E4041393
peak_0055969	ATF3	Closing	Atf3	ATF3	known9.motif	chr3	186330746	186331616	DGKG	-1.80118	1.99851e-09	intron (NM_001346, intron 1 of 24)	31053	gene_body	-0.801307	0.0917308	0.801307	concordant_down	3	-3.92028	0.000169874	yes	gene_not_significant	TF_down	coherent_activation_loss	active_enhancer	0	1	0	1	1	0	0	0	2	2	2	9	yes	2	EH38D5522876	EH38E3559108	dELS	dELS	EH38E3559108;EH38E3559109
peak_0055969	FOSL1	Closing	Fra1	FOSL1	known4.motif	chr3	186330746	186331616	DGKG	-1.80118	1.99851e-09	intron (NM_001346, intron 1 of 24)	31053	gene_body	-0.801307	0.0917308	0.801307	concordant_down	3	-2.84522	0.0038438	yes	gene_not_significant	TF_down	coherent_activation_loss	active_enhancer	0	1	0	1	1	0	0	0	2	2	2	9	yes	2	EH38D5522876	EH38E3559108	dELS	dELS	EH38E3559108;EH38E3559109
peak_0055969	FOSL2	Closing	Fra2	FOSL2	known11.motif	chr3	186330746	186331616	DGKG	-1.80118	1.99851e-09	intron (NM_001346, intron 1 of 24)	31053	gene_body	-0.801307	0.0917308	0.801307	concordant_down	3	-2.94385	0.00157751	yes	gene_not_significant	TF_down	coherent_activation_loss	active_enhancer	0	1	0	1	1	0	0	0	2	2	2	9	yes	2	EH38D5522876	EH38E3559108	dELS	dELS	EH38E3559108;EH38E3559109
peak_0055969	NFATC1	Closing	NFAT:AP1	NFATC1;NFATC2;NFATC3;NFATC4;JUN;FOS;BATF	known1.motif	chr3	186330746	186331616	DGKG	-1.80118	1.99851e-09	intron (NM_001346, intron 1 of 24)	31053	gene_body	-0.801307	0.0917308	0.801307	concordant_down	3	-0.764829	0.0475296	yes	gene_not_significant	TF_down	coherent_activation_loss	active_enhancer	0	1	0	1	1	0	0	0	2	2	2	9	yes	2	EH38D5522876	EH38E3559108	dELS	dELS	EH38E3559108;EH38E3559109
peak_0055969	NFATC1	Closing	NFAT	NFATC1;NFATC2;NFATC3;NFATC4	known2.motif	chr3	186330746	186331616	DGKG	-1.80118	1.99851e-09	intron (NM_001346, intron 1 of 24)	31053	gene_body	-0.801307	0.0917308	0.801307	concordant_down	3	-0.764829	0.0475296	yes	gene_not_significant	TF_down	coherent_activation_loss	active_enhancer	0	1	0	1	1	0	0	0	2	2	2	9	yes	2	EH38D5522876	EH38E3559108	dELS	dELS	EH38E3559108;EH38E3559109
peak_0055969	NFKB1	Closing	NFkB-p65	NFKB1;RELA;RELB;NFKB2;REL	known10.motif	chr3	186330746	186331616	DGKG	-1.80118	1.99851e-09	intron (NM_001346, intron 1 of 24)	31053	gene_body	-0.801307	0.0917308	0.801307	concordant_down	3	-1.24321	1.12356e-09	yes	gene_not_significant	TF_down	coherent_activation_loss	active_enhancer	0	1	0	1	1	0	0	0	2	2	2	9	yes	2	EH38D5522876	EH38E3559108	dELS	dELS	EH38E3559108;EH38E3559109
peak_0055969	NFKB1	Closing	NFkB-p50,p52	NFKB1;NFKB2	known13.motif	chr3	186330746	186331616	DGKG	-1.80118	1.99851e-09	intron (NM_001346, intron 1 of 24)	31053	gene_body	-0.801307	0.0917308	0.801307	concordant_down	3	-1.24321	1.12356e-09	yes	gene_not_significant	TF_down	coherent_activation_loss	active_enhancer	0	1	0	1	1	0	0	0	2	2	2	9	yes	2	EH38D5522876	EH38E3559108	dELS	dELS	EH38E3559108;EH38E3559109
peak_0003608	NFATC1	Closing	NFAT	NFATC1;NFATC2;NFATC3;NFATC4	known2.motif	chr1	97505662	97506655	DPYD-AS2	-1.47572	0.00176375	intron (NM_000110, intron 13 of 22)	-290762	gene_body	-0.476315	1	0.476315	concordant_down	3	-0.764829	0.0475296	yes	gene_not_significant	TF_down	coherent_activation_loss	active_enhancer	0	1	1	1	1	0	0	0	2	2	2	9	yes	2	EH38D2201387	EH38E1370480	dELS	dELS	EH38E1370480;EH38E1370481
peak_0003608	NFKB1	Closing	NFkB-p65	NFKB1;RELA;RELB;NFKB2;REL	known10.motif	chr1	97505662	97506655	DPYD-AS2	-1.47572	0.00176375	intron (NM_000110, intron 13 of 22)	-290762	gene_body	-0.476315	1	0.476315	concordant_down	3	-1.24321	1.12356e-09	yes	gene_not_significant	TF_down	coherent_activation_loss	active_enhancer	0	1	1	1	1	0	0	0	2	2	2	9	yes	2	EH38D2201387	EH38E1370480	dELS	dELS	EH38E1370480;EH38E1370481
peak_0026221	ATF3	Closing	Atf3	ATF3	known9.motif	chr15	69574123	69575113	DRAIC	-1.30935	1.38947e-07	Intergenic	12898	distal	-2.26396	0.000128862	2.26396	concordant_down	3	-3.92028	0.000169874	yes	gene_down	TF_down	coherent_activation_loss	active_enhancer	0	0	1	1	1	0	0	0	2	2	2	9	yes	3	EH38D2804958	EH38E1774048	dELS	dELS	EH38E1774048;EH38E3143126;EH38E3143127
peak_0026221	EGR2	Closing	Egr2	EGR2	known16.motif	chr15	69574123	69575113	DRAIC	-1.30935	1.38947e-07	Intergenic	12898	distal	-2.26396	0.000128862	2.26396	concordant_down	3	-5.0555	5.55296e-22	yes	gene_down	TF_down	coherent_activation_loss	active_enhancer	0	0	1	1	1	0	0	0	2	2	2	9	yes	3	EH38D2804958	EH38E1774048	dELS	dELS	EH38E1774048;EH38E3143126;EH38E3143127
peak_0026221	FOSL1	Closing	Fra1	FOSL1	known4.motif	chr15	69574123	69575113	DRAIC	-1.30935	1.38947e-07	Intergenic	12898	distal	-2.26396	0.000128862	2.26396	concordant_down	3	-2.84522	0.0038438	yes	gene_down	TF_down	coherent_activation_loss	active_enhancer	0	0	1	1	1	0	0	0	2	2	2	9	yes	3	EH38D2804958	EH38E1774048	dELS	dELS	EH38E1774048;EH38E3143126;EH38E3143127
peak_0026221	FOSL2	Closing	Fra2	FOSL2	known11.motif	chr15	69574123	69575113	DRAIC	-1.30935	1.38947e-07	Intergenic	12898	distal	-2.26396	0.000128862	2.26396	concordant_down	3	-2.94385	0.00157751	yes	gene_down	TF_down	coherent_activation_loss	active_enhancer	0	0	1	1	1	0	0	0	2	2	2	9	yes	3	EH38D2804958	EH38E1774048	dELS	dELS	EH38E1774048;EH38E3143126;EH38E3143127
peak_0026221	FOSL2	Closing	Fosl2	FOSL2	known8.motif	chr15	69574123	69575113	DRAIC	-1.30935	1.38947e-07	Intergenic	12898	distal	-2.26396	0.000128862	2.26396	concordant_down	3	-2.94385	0.00157751	yes	gene_down	TF_down	coherent_activation_loss	active_enhancer	0	0	1	1	1	0	0	0	2	2	2	9	yes	3	EH38D2804958	EH38E1774048	dELS	dELS	EH38E1774048;EH38E3143126;EH38E3143127
peak_0026221	NFATC1	Closing	NFAT:AP1	NFATC1;NFATC2;NFATC3;NFATC4;JUN;FOS;BATF	known1.motif	chr15	69574123	69575113	DRAIC	-1.30935	1.38947e-07	Intergenic	12898	distal	-2.26396	0.000128862	2.26396	concordant_down	3	-0.764829	0.0475296	yes	gene_down	TF_down	coherent_activation_loss	active_enhancer	0	0	1	1	1	0	0	0	2	2	2	9	yes	3	EH38D2804958	EH38E1774048	dELS	dELS	EH38E1774048;EH38E3143126;EH38E3143127
peak_0065007	NFATC1	Closing	NFAT	NFATC1;NFATC2;NFATC3;NFATC4	known2.motif	chr6	15612736	15613227	DTNBP1	-1.23878	1.66645e-05	intron (NR_036448, intron 7 of 9)	50046	gene_body	-0.169634	0.674804	0.169634	concordant_down	3	-0.764829	0.0475296	yes	gene_not_significant	TF_down	coherent_activation_loss	active_enhancer	0	1	0	1	1	0	0	1	2	2	2	9	yes	2	EH38D5733072	EH38E3693196	dELS	dELS	EH38E3693196;EH38E3693197
peak_0065007	NFKB1	Closing	NFkB-p65	NFKB1;RELA;RELB;NFKB2;REL	known10.motif	chr6	15612736	15613227	DTNBP1	-1.23878	1.66645e-05	intron (NR_036448, intron 7 of 9)	50046	gene_body	-0.169634	0.674804	0.169634	concordant_down	3	-1.24321	1.12356e-09	yes	gene_not_significant	TF_down	coherent_activation_loss	active_enhancer	0	1	0	1	1	0	0	1	2	2	2	9	yes	2	EH38D5733072	EH38E3693196	dELS	dELS	EH38E3693196;EH38E3693197
peak_0019447	EGR2	Closing	Egr2	EGR2	known16.motif	chr12	113083941	113084480	DTX1	-1.25773	0.00939635	intron (NM_004416, intron 2 of 8)	26354	gene_body	-0.0645717	1	0.0645717	concordant_down	3	-5.0555	5.55296e-22	yes	gene_not_significant	TF_down	coherent_activation_loss	active_enhancer	0	1	0	1	1	1	0	1	2	2	2	9	yes	1	EH38D2608787	EH38E1645501	dELS	dELS	EH38E1645501
peak_0019447	NFATC1	Closing	NFAT:AP1	NFATC1;NFATC2;NFATC3;NFATC4;JUN;FOS;BATF	known1.motif	chr12	113083941	113084480	DTX1	-1.25773	0.00939635	intron (NM_004416, intron 2 of 8)	26354	gene_body	-0.0645717	1	0.0645717	concordant_down	3	-0.764829	0.0475296	yes	gene_not_significant	TF_down	coherent_activation_loss	active_enhancer	0	1	0	1	1	1	0	1	2	2	2	9	yes	1	EH38D2608787	EH38E1645501	dELS	dELS	EH38E1645501
peak_0019447	NFATC1	Closing	NFAT	NFATC1;NFATC2;NFATC3;NFATC4	known2.motif	chr12	113083941	113084480	DTX1	-1.25773	0.00939635	intron (NM_004416, intron 2 of 8)	26354	gene_body	-0.0645717	1	0.0645717	concordant_down	3	-0.764829	0.0475296	yes	gene_not_significant	TF_down	coherent_activation_loss	active_enhancer	0	1	0	1	1	1	0	1	2	2	2	9	yes	1	EH38D2608787	EH38E1645501	dELS	dELS	EH38E1645501
peak_0074281	IRF4	Closing	IRF4	IRF4	known28.motif	chr8	29523767	29523914	DUSP4	-1.7972	0.026314	Intergenic	-173157	distal	-4.21968	0.000454796	4.21968	concordant_down	3	-1.96215	1.03297e-08	yes	gene_down	TF_down	coherent_activation_loss	active_enhancer	0	0	1	1	1	0	0	0	2	2	2	9	yes	1	EH38D4077201	EH38E2621217	dELS	dELS	EH38E2621217
peak_0074282	NFATC1	Closing	NFAT	NFATC1;NFATC2;NFATC3;NFATC4	known2.motif	chr8	29523997	29524967	DUSP4	-1.85502	0.000594246	Intergenic	-173798	distal	-4.21968	0.000454796	4.21968	concordant_down	3	-0.764829	0.0475296	yes	gene_down	TF_down	coherent_activation_loss	active_enhancer	0	0	1	1	1	0	0	0	2	2	2	9	yes	4	EH38D4077201	EH38E2621217	dELS	dELS	EH38E2621217;EH38E3826148;EH38E3826149;EH38E4464317
peak_0011085	ATF3	Closing	Atf3	ATF3	known9.motif	chr10	110529002	110529330	DUSP5	-1.35636	0.00150406	Intergenic	31259	distal	-3.09208	0.00439842	3.09208	concordant_down	3	-3.92028	0.000169874	yes	gene_down	TF_down	coherent_activation_loss	active_enhancer	0	0	1	1	1	1	0	0	2	2	2	9	yes	1	EH38D4551026	EH38E2924565	dELS	dELS	EH38E2924565
peak_0011085	NFKB1	Closing	NFkB-p65	NFKB1;RELA;RELB;NFKB2;REL	known10.motif	chr10	110529002	110529330	DUSP5	-1.35636	0.00150406	Intergenic	31259	distal	-3.09208	0.00439842	3.09208	concordant_down	3	-1.24321	1.12356e-09	yes	gene_down	TF_down	coherent_activation_loss	active_enhancer	0	0	1	1	1	1	0	0	2	2	2	9	yes	1	EH38D4551026	EH38E2924565	dELS	dELS	EH38E2924565
peak_0076037	NFATC1	Closing	NFAT:AP1	NFATC1;NFATC2;NFATC3;NFATC4;JUN;FOS;BATF	known1.motif	chr8	109527090	109527261	EBAG9	-1.08612	0.0194057	intron (NM_177531, intron 77 of 77)	-12524	gene_body	-0.106522	1	0.106522	concordant_down	3	-0.764829	0.0475296	yes	gene_not_significant	TF_down	coherent_activation_loss	active_enhancer	0	1	1	1	1	1	0	0	2	2	2	9	yes	1	EH38D5977906	EH38E3851467	dELS	dELS	EH38E3851467
peak_0076037	NFATC1	Closing	NFAT	NFATC1;NFATC2;NFATC3;NFATC4	known2.motif	chr8	109527090	109527261	EBAG9	-1.08612	0.0194057	intron (NM_177531, intron 77 of 77)	-12524	gene_body	-0.106522	1	0.106522	concordant_down	3	-0.764829	0.0475296	yes	gene_not_significant	TF_down	coherent_activation_loss	active_enhancer	0	1	1	1	1	1	0	0	2	2	2	9	yes	1	EH38D5977906	EH38E3851467	dELS	dELS	EH38E3851467
peak_0009522	ATF3	Closing	Atf3	ATF3	known9.motif	chr10	62811327	62811845	EGR2	-1.22661	2.57571e-06	TTS (NM_000399)	4780	distal	-5.0555	5.55296e-22	5.0555	concordant_down	3	-3.92028	0.000169874	yes	gene_down	TF_down	coherent_activation_loss	active_enhancer	0	0	1	1	1	1	0	0	2	2	2	9	yes	1	EH38D4519049	EH38E2903785	dELS	dELS	EH38E2903785
peak_0009522	FOSL1	Closing	Fra1	FOSL1	known4.motif	chr10	62811327	62811845	EGR2	-1.22661	2.57571e-06	TTS (NM_000399)	4780	distal	-5.0555	5.55296e-22	5.0555	concordant_down	3	-2.84522	0.0038438	yes	gene_down	TF_down	coherent_activation_loss	active_enhancer	0	0	1	1	1	1	0	0	2	2	2	9	yes	1	EH38D4519049	EH38E2903785	dELS	dELS	EH38E2903785
peak_0009522	FOSL2	Closing	Fra2	FOSL2	known11.motif	chr10	62811327	62811845	EGR2	-1.22661	2.57571e-06	TTS (NM_000399)	4780	distal	-5.0555	5.55296e-22	5.0555	concordant_down	3	-2.94385	0.00157751	yes	gene_down	TF_down	coherent_activation_loss	active_enhancer	0	0	1	1	1	1	0	0	2	2	2	9	yes	1	EH38D4519049	EH38E2903785	dELS	dELS	EH38E2903785
peak_0009522	FOSL2	Closing	Fosl2	FOSL2	known8.motif	chr10	62811327	62811845	EGR2	-1.22661	2.57571e-06	TTS (NM_000399)	4780	distal	-5.0555	5.55296e-22	5.0555	concordant_down	3	-2.94385	0.00157751	yes	gene_down	TF_down	coherent_activation_loss	active_enhancer	0	0	1	1	1	1	0	0	2	2	2	9	yes	1	EH38D4519049	EH38E2903785	dELS	dELS	EH38E2903785
peak_0009522	NFATC1	Closing	NFAT	NFATC1;NFATC2;NFATC3;NFATC4	known2.motif	chr10	62811327	62811845	EGR2	-1.22661	2.57571e-06	TTS (NM_000399)	4780	distal	-5.0555	5.55296e-22	5.0555	concordant_down	3	-0.764829	0.0475296	yes	gene_down	TF_down	coherent_activation_loss	active_enhancer	0	0	1	1	1	1	0	0	2	2	2	9	yes	1	EH38D4519049	EH38E2903785	dELS	dELS	EH38E2903785
peak_0009522	NFKB1	Closing	NFkB-p65	NFKB1;RELA;RELB;NFKB2;REL	known10.motif	chr10	62811327	62811845	EGR2	-1.22661	2.57571e-06	TTS (NM_000399)	4780	distal	-5.0555	5.55296e-22	5.0555	concordant_down	3	-1.24321	1.12356e-09	yes	gene_down	TF_down	coherent_activation_loss	active_enhancer	0	0	1	1	1	1	0	0	2	2	2	9	yes	1	EH38D4519049	EH38E2903785	dELS	dELS	EH38E2903785
peak_0009522	NFKB1	Closing	NFkB-p50,p52	NFKB1;NFKB2	known13.motif	chr10	62811327	62811845	EGR2	-1.22661	2.57571e-06	TTS (NM_000399)	4780	distal	-5.0555	5.55296e-22	5.0555	concordant_down	3	-1.24321	1.12356e-09	yes	gene_down	TF_down	coherent_activation_loss	active_enhancer	0	0	1	1	1	1	0	0	2	2	2	9	yes	1	EH38D4519049	EH38E2903785	dELS	dELS	EH38E2903785
peak_0071090	NFATC1	Closing	NFAT	NFATC1;NFATC2;NFATC3;NFATC4	known2.motif	chr7	74178698	74178970	EIF4H	-1.48629	0.000801352	intron (NM_031992, intron 1 of 5)	4478	gene_body	-0.404789	0.00926557	0.404789	concordant_down	3	-0.764829	0.0475296	yes	gene_down	TF_down	coherent_activation_loss	active_enhancer	0	1	0	1	1	0	0	1	2	2	2	9	yes	1	EH38D5865116	EH38E3779964	dELS	dELS	EH38E3779964
peak_0070327	ATF3	Closing	Atf3	ATF3	known9.motif	chr7	37354717	37355090	ELMO1	-1.22286	0.000116386	intron (NM_001206480, intron 1 of 21)	-1236	gene_body	-0.355604	0.070324	0.355604	concordant_down	3	-3.92028	0.000169874	yes	gene_not_significant	TF_down	coherent_activation_loss	active_enhancer	0	1	1	1	1	0	0	0	2	2	2	9	yes	1	EH38D5845846	EH38E3768306	pELS	pELS	EH38E3768306
peak_0070327	FOSL1	Closing	Fra1	FOSL1	known4.motif	chr7	37354717	37355090	ELMO1	-1.22286	0.000116386	intron (NM_001206480, intron 1 of 21)	-1236	gene_body	-0.355604	0.070324	0.355604	concordant_down	3	-2.84522	0.0038438	yes	gene_not_significant	TF_down	coherent_activation_loss	active_enhancer	0	1	1	1	1	0	0	0	2	2	2	9	yes	1	EH38D5845846	EH38E3768306	pELS	pELS	EH38E3768306
peak_0070327	FOSL2	Closing	Fra2	FOSL2	known11.motif	chr7	37354717	37355090	ELMO1	-1.22286	0.000116386	intron (NM_001206480, intron 1 of 21)	-1236	gene_body	-0.355604	0.070324	0.355604	concordant_down	3	-2.94385	0.00157751	yes	gene_not_significant	TF_down	coherent_activation_loss	active_enhancer	0	1	1	1	1	0	0	0	2	2	2	9	yes	1	EH38D5845846	EH38E3768306	pELS	pELS	EH38E3768306
peak_0070327	FOSL2	Closing	Fosl2	FOSL2	known8.motif	chr7	37354717	37355090	ELMO1	-1.22286	0.000116386	intron (NM_001206480, intron 1 of 21)	-1236	gene_body	-0.355604	0.070324	0.355604	concordant_down	3	-2.94385	0.00157751	yes	gene_not_significant	TF_down	coherent_activation_loss	active_enhancer	0	1	1	1	1	0	0	0	2	2	2	9	yes	1	EH38D5845846	EH38E3768306	pELS	pELS	EH38E3768306
peak_0070327	NFATC1	Closing	NFAT:AP1	NFATC1;NFATC2;NFATC3;NFATC4;JUN;FOS;BATF	known1.motif	chr7	37354717	37355090	ELMO1	-1.22286	0.000116386	intron (NM_001206480, intron 1 of 21)	-1236	gene_body	-0.355604	0.070324	0.355604	concordant_down	3	-0.764829	0.0475296	yes	gene_not_significant	TF_down	coherent_activation_loss	active_enhancer	0	1	1	1	1	0	0	0	2	2	2	9	yes	1	EH38D5845846	EH38E3768306	pELS	pELS	EH38E3768306
peak_0070327	RFX5	Closing	Rfx5	RFX5	known108.motif	chr7	37354717	37355090	ELMO1	-1.22286	0.000116386	intron (NM_001206480, intron 1 of 21)	-1236	gene_body	-0.355604	0.070324	0.355604	concordant_down	3	-0.493972	0.000101039	yes	gene_not_significant	TF_down	coherent_activation_loss	active_enhancer	0	1	1	1	1	0	0	0	2	2	2	9	yes	1	EH38D5845846	EH38E3768306	pELS	pELS	EH38E3768306
peak_0032956	IRF4	Closing	IRF4	IRF4	known28.motif	chr17	64075974	64076233	ERN1	-2.0104	0.000812249	intron (NM_001433, intron 4 of 21)	54040	gene_body	-0.730625	0.00564163	0.730625	concordant_down	3	-1.96215	1.03297e-08	yes	gene_down	TF_down	coherent_activation_loss	active_enhancer	0	1	0	1	1	0	0	0	2	2	2	9	yes	1	EH38D5031222	EH38E3236951	dELS	dELS	EH38E3236951
peak_0001554	NFATC1	Closing	NFAT:AP1	NFATC1;NFATC2;NFATC3;NFATC4;JUN;FOS;BATF	known1.motif	chr1	28056115	28056746	EYA3	-1.02679	5.00472e-05	intron (NM_001282562, intron 2 of 16)	32179	gene_body	-0.0601288	1	0.0601288	concordant_down	3	-0.764829	0.0475296	yes	gene_not_significant	TF_down	coherent_activation_loss	active_enhancer	0	1	0	1	1	0	0	0	2	2	2	9	yes	2	EH38D4360449	EH38E2798259	pELS	pELS	EH38E2798259;EH38E3959258
peak_0075451	ATF3	Closing	Atf3	ATF3	known9.motif	chr8	81286761	81287003	FABP5	-1.35304	0.00398879	Intergenic	6346	distal	-1.93023	2.59883e-06	1.93023	concordant_down	3	-3.92028	0.000169874	yes	gene_down	TF_down	coherent_activation_loss	active_enhancer	0	0	0	1	1	0	0	0	2	2	2	9	yes	1	EH38D5963972	EH38E3842386	dELS	dELS	EH38E3842386
peak_0075451	FOSL1	Closing	Fra1	FOSL1	known4.motif	chr8	81286761	81287003	FABP5	-1.35304	0.00398879	Intergenic	6346	distal	-1.93023	2.59883e-06	1.93023	concordant_down	3	-2.84522	0.0038438	yes	gene_down	TF_down	coherent_activation_loss	active_enhancer	0	0	0	1	1	0	0	0	2	2	2	9	yes	1	EH38D5963972	EH38E3842386	dELS	dELS	EH38E3842386
peak_0075451	FOSL2	Closing	Fra2	FOSL2	known11.motif	chr8	81286761	81287003	FABP5	-1.35304	0.00398879	Intergenic	6346	distal	-1.93023	2.59883e-06	1.93023	concordant_down	3	-2.94385	0.00157751	yes	gene_down	TF_down	coherent_activation_loss	active_enhancer	0	0	0	1	1	0	0	0	2	2	2	9	yes	1	EH38D5963972	EH38E3842386	dELS	dELS	EH38E3842386
peak_0075451	FOSL2	Closing	Fosl2	FOSL2	known8.motif	chr8	81286761	81287003	FABP5	-1.35304	0.00398879	Intergenic	6346	distal	-1.93023	2.59883e-06	1.93023	concordant_down	3	-2.94385	0.00157751	yes	gene_down	TF_down	coherent_activation_loss	active_enhancer	0	0	0	1	1	0	0	0	2	2	2	9	yes	1	EH38D5963972	EH38E3842386	dELS	dELS	EH38E3842386
peak_0008434	NFATC1	Closing	NFAT	NFATC1;NFATC2;NFATC3;NFATC4	known2.motif	chr10	14683256	14683722	FAM107B	-1.05099	0.0114735	intron (NM_031453, intron 1 of 4)	-79088	gene_body	-0.520633	0.17988	0.520633	concordant_down	3	-0.764829	0.0475296	yes	gene_not_significant	TF_down	coherent_activation_loss	active_enhancer	0	1	0	1	1	0	0	0	2	2	2	9	yes	1	EH38D2317476	EH38E1450423	dELS	dELS	EH38E1450423
peak_0008434	NFKB1	Closing	NFkB-p65	NFKB1;RELA;RELB;NFKB2;REL	known10.motif	chr10	14683256	14683722	FAM107B	-1.05099	0.0114735	intron (NM_031453, intron 1 of 4)	-79088	gene_body	-0.520633	0.17988	0.520633	concordant_down	3	-1.24321	1.12356e-09	yes	gene_not_significant	TF_down	coherent_activation_loss	active_enhancer	0	1	0	1	1	0	0	0	2	2	2	9	yes	1	EH38D2317476	EH38E1450423	dELS	dELS	EH38E1450423
peak_0063717	NFATC1	Closing	NFAT	NFATC1;NFATC2;NFATC3;NFATC4	known2.motif	chr5	171961121	171961687	FBXW11	-1.37517	0.00237981	intron (NM_012300, intron 1 of 12)	45469	gene_body	-0.105859	1	0.105859	concordant_down	3	-0.764829	0.0475296	yes	gene_not_significant	TF_down	coherent_activation_loss	active_enhancer	0	1	0	1	1	0	0	0	2	2	2	9	yes	1	EH38D5711374	EH38E3678304	dELS	dELS	EH38E3678304
peak_0063717	NFKB1	Closing	NFkB-p65	NFKB1;RELA;RELB;NFKB2;REL	known10.motif	chr5	171961121	171961687	FBXW11	-1.37517	0.00237981	intron (NM_012300, intron 1 of 12)	45469	gene_body	-0.105859	1	0.105859	concordant_down	3	-1.24321	1.12356e-09	yes	gene_not_significant	TF_down	coherent_activation_loss	active_enhancer	0	1	0	1	1	0	0	0	2	2	2	9	yes	1	EH38D5711374	EH38E3678304	dELS	dELS	EH38E3678304
peak_0002782	NFATC1	Closing	NFAT:AP1	NFATC1;NFATC2;NFATC3;NFATC4;JUN;FOS;BATF	known1.motif	chr1	59354759	59355674	FGGY	-1.26267	7.93191e-06	intron (NM_001350794, intron 4 of 14)	45185	gene_body	-0.262384	0.800701	0.262384	concordant_down	3	-0.764829	0.0475296	yes	gene_not_significant	TF_down	coherent_activation_loss	active_enhancer	0	1	0	1	1	0	0	0	2	2	2	9	yes	3	EH38D2172256	EH38E1352111	dELS	dELS	EH38E1352111;EH38E2814810;EH38E2814811
peak_0002782	NFATC1	Closing	NFAT	NFATC1;NFATC2;NFATC3;NFATC4	known2.motif	chr1	59354759	59355674	FGGY	-1.26267	7.93191e-06	intron (NM_001350794, intron 4 of 14)	45185	gene_body	-0.262384	0.800701	0.262384	concordant_down	3	-0.764829	0.0475296	yes	gene_not_significant	TF_down	coherent_activation_loss	active_enhancer	0	1	0	1	1	0	0	0	2	2	2	9	yes	3	EH38D2172256	EH38E1352111	dELS	dELS	EH38E1352111;EH38E2814810;EH38E2814811
peak_0002782	RFX5	Closing	Rfx5	RFX5	known108.motif	chr1	59354759	59355674	FGGY	-1.26267	7.93191e-06	intron (NM_001350794, intron 4 of 14)	45185	gene_body	-0.262384	0.800701	0.262384	concordant_down	3	-0.493972	0.000101039	yes	gene_not_significant	TF_down	coherent_activation_loss	active_enhancer	0	1	0	1	1	0	0	0	2	2	2	9	yes	3	EH38D2172256	EH38E1352111	dELS	dELS	EH38E1352111;EH38E2814810;EH38E2814811
peak_0080015	FOSL1	Closing	Fra1	FOSL1	known4.motif	chr9	129994959	129995359	FNBP1	-1.50602	0.000790477	intron (NM_001363755, intron 1 of 15)	48030	gene_body	-0.0331441	1	0.0331441	concordant_down	3	-2.84522	0.0038438	yes	gene_not_significant	TF_down	coherent_activation_loss	active_enhancer	0	1	1	1	1	0	0	0	2	2	2	9	yes	2	EH38D6071765	EH38E3912653	dELS	dELS	EH38E3912653;EH38E3912654
peak_0080015	NFATC1	Closing	NFAT:AP1	NFATC1;NFATC2;NFATC3;NFATC4;JUN;FOS;BATF	known1.motif	chr9	129994959	129995359	FNBP1	-1.50602	0.000790477	intron (NM_001363755, intron 1 of 15)	48030	gene_body	-0.0331441	1	0.0331441	concordant_down	3	-0.764829	0.0475296	yes	gene_not_significant	TF_down	coherent_activation_loss	active_enhancer	0	1	1	1	1	0	0	0	2	2	2	9	yes	2	EH38D6071765	EH38E3912653	dELS	dELS	EH38E3912653;EH38E3912654
peak_0080015	NFATC1	Closing	NFAT	NFATC1;NFATC2;NFATC3;NFATC4	known2.motif	chr9	129994959	129995359	FNBP1	-1.50602	0.000790477	intron (NM_001363755, intron 1 of 15)	48030	gene_body	-0.0331441	1	0.0331441	concordant_down	3	-0.764829	0.0475296	yes	gene_not_significant	TF_down	coherent_activation_loss	active_enhancer	0	1	1	1	1	0	0	0	2	2	2	9	yes	2	EH38D6071765	EH38E3912653	dELS	dELS	EH38E3912653;EH38E3912654
peak_0062545	NFATC1	Closing	NFAT	NFATC1;NFATC2;NFATC3;NFATC4	known2.motif	chr5	131771554	131772049	FNIP1	-1.03532	0.000356579	intron (NM_133372, intron 1 of 17)	25215	gene_body	-0.013959	1	0.013959	concordant_down	3	-0.764829	0.0475296	yes	gene_not_significant	TF_down	coherent_activation_loss	active_enhancer	0	1	0	1	1	0	0	0	2	2	2	9	yes	2	EH38D5684079	EH38E3660106	dELS	dELS	EH38E3660106;EH38E3660107
peak_0024196	ATF3	Closing	Atf3	ATF3	known9.motif	chr14	89276371	89277425	FOXN3	-1.41313	0.000360709	intron (NM_001085471, intron 4 of 6)	140335	gene_body	-0.576294	0.000325558	0.576294	concordant_down	3	-3.92028	0.000169874	yes	gene_down	TF_down	coherent_activation_loss	active_enhancer	0	1	0	1	1	0	0	1	2	2	2	9	yes	3	EH38D2748996	EH38E1734521	dELS	dELS	EH38E1734521;EH38E3109672;EH38E3109673
peak_0024196	EGR2	Closing	Egr2	EGR2	known16.motif	chr14	89276371	89277425	FOXN3	-1.41313	0.000360709	intron (NM_001085471, intron 4 of 6)	140335	gene_body	-0.576294	0.000325558	0.576294	concordant_down	3	-5.0555	5.55296e-22	yes	gene_down	TF_down	coherent_activation_loss	active_enhancer	0	1	0	1	1	0	0	1	2	2	2	9	yes	3	EH38D2748996	EH38E1734521	dELS	dELS	EH38E1734521;EH38E3109672;EH38E3109673
peak_0024196	FOSL1	Closing	Fra1	FOSL1	known4.motif	chr14	89276371	89277425	FOXN3	-1.41313	0.000360709	intron (NM_001085471, intron 4 of 6)	140335	gene_body	-0.576294	0.000325558	0.576294	concordant_down	3	-2.84522	0.0038438	yes	gene_down	TF_down	coherent_activation_loss	active_enhancer	0	1	0	1	1	0	0	1	2	2	2	9	yes	3	EH38D2748996	EH38E1734521	dELS	dELS	EH38E1734521;EH38E3109672;EH38E3109673
peak_0024196	FOSL2	Closing	Fra2	FOSL2	known11.motif	chr14	89276371	89277425	FOXN3	-1.41313	0.000360709	intron (NM_001085471, intron 4 of 6)	140335	gene_body	-0.576294	0.000325558	0.576294	concordant_down	3	-2.94385	0.00157751	yes	gene_down	TF_down	coherent_activation_loss	active_enhancer	0	1	0	1	1	0	0	1	2	2	2	9	yes	3	EH38D2748996	EH38E1734521	dELS	dELS	EH38E1734521;EH38E3109672;EH38E3109673
peak_0024196	FOSL2	Closing	Fosl2	FOSL2	known8.motif	chr14	89276371	89277425	FOXN3	-1.41313	0.000360709	intron (NM_001085471, intron 4 of 6)	140335	gene_body	-0.576294	0.000325558	0.576294	concordant_down	3	-2.94385	0.00157751	yes	gene_down	TF_down	coherent_activation_loss	active_enhancer	0	1	0	1	1	0	0	1	2	2	2	9	yes	3	EH38D2748996	EH38E1734521	dELS	dELS	EH38E1734521;EH38E3109672;EH38E3109673
peak_0024196	IRF4	Closing	IRF4	IRF4	known28.motif	chr14	89276371	89277425	FOXN3	-1.41313	0.000360709	intron (NM_001085471, intron 4 of 6)	140335	gene_body	-0.576294	0.000325558	0.576294	concordant_down	3	-1.96215	1.03297e-08	yes	gene_down	TF_down	coherent_activation_loss	active_enhancer	0	1	0	1	1	0	0	1	2	2	2	9	yes	3	EH38D2748996	EH38E1734521	dELS	dELS	EH38E1734521;EH38E3109672;EH38E3109673
peak_0024196	NFATC1	Closing	NFAT	NFATC1;NFATC2;NFATC3;NFATC4	known2.motif	chr14	89276371	89277425	FOXN3	-1.41313	0.000360709	intron (NM_001085471, intron 4 of 6)	140335	gene_body	-0.576294	0.000325558	0.576294	concordant_down	3	-0.764829	0.0475296	yes	gene_down	TF_down	coherent_activation_loss	active_enhancer	0	1	0	1	1	0	0	1	2	2	2	9	yes	3	EH38D2748996	EH38E1734521	dELS	dELS	EH38E1734521;EH38E3109672;EH38E3109673
peak_0024196	NFKB1	Closing	NFkB-p65	NFKB1;RELA;RELB;NFKB2;REL	known10.motif	chr14	89276371	89277425	FOXN3	-1.41313	0.000360709	intron (NM_001085471, intron 4 of 6)	140335	gene_body	-0.576294	0.000325558	0.576294	concordant_down	3	-1.24321	1.12356e-09	yes	gene_down	TF_down	coherent_activation_loss	active_enhancer	0	1	0	1	1	0	0	1	2	2	2	9	yes	3	EH38D2748996	EH38E1734521	dELS	dELS	EH38E1734521;EH38E3109672;EH38E3109673
peak_0053503	ATF3	Closing	Atf3	ATF3	known9.motif	chr3	71080657	71081116	FOXP1	-1.06081	0.000222407	intron (NR_146142, intron 7 of 19)	-15963	gene_body	-0.400441	0.0779078	0.400441	concordant_down	3	-3.92028	0.000169874	yes	gene_not_significant	TF_down	coherent_activation_loss	active_enhancer	0	1	1	1	1	0	0	1	2	2	2	9	yes	1	EH38D5465080	EH38E3522197	dELS	dELS	EH38E3522197
peak_0053503	FOSL1	Closing	Fra1	FOSL1	known4.motif	chr3	71080657	71081116	FOXP1	-1.06081	0.000222407	intron (NR_146142, intron 7 of 19)	-15963	gene_body	-0.400441	0.0779078	0.400441	concordant_down	3	-2.84522	0.0038438	yes	gene_not_significant	TF_down	coherent_activation_loss	active_enhancer	0	1	1	1	1	0	0	1	2	2	2	9	yes	1	EH38D5465080	EH38E3522197	dELS	dELS	EH38E3522197
peak_0053503	FOSL2	Closing	Fra2	FOSL2	known11.motif	chr3	71080657	71081116	FOXP1	-1.06081	0.000222407	intron (NR_146142, intron 7 of 19)	-15963	gene_body	-0.400441	0.0779078	0.400441	concordant_down	3	-2.94385	0.00157751	yes	gene_not_significant	TF_down	coherent_activation_loss	active_enhancer	0	1	1	1	1	0	0	1	2	2	2	9	yes	1	EH38D5465080	EH38E3522197	dELS	dELS	EH38E3522197
peak_0053503	IRF4	Closing	IRF4	IRF4	known28.motif	chr3	71080657	71081116	FOXP1	-1.06081	0.000222407	intron (NR_146142, intron 7 of 19)	-15963	gene_body	-0.400441	0.0779078	0.400441	concordant_down	3	-1.96215	1.03297e-08	yes	gene_not_significant	TF_down	coherent_activation_loss	active_enhancer	0	1	1	1	1	0	0	1	2	2	2	9	yes	1	EH38D5465080	EH38E3522197	dELS	dELS	EH38E3522197
peak_0053514	IRF4	Closing	IRF4	IRF4	known28.motif	chr3	71127178	71127827	FOXP1	-1.03118	1.13181e-06	intron (NR_146142, intron 6 of 19)	3083	gene_body	-0.400441	0.0779078	0.400441	concordant_down	3	-1.96215	1.03297e-08	yes	gene_not_significant	TF_down	coherent_activation_loss	active_enhancer	0	1	1	1	1	0	0	1	2	2	2	9	yes	2	EH38D3444301	EH38E2213017	dELS	dELS	EH38E2213017;EH38E3522230
peak_0053514	NFATC1	Closing	NFAT	NFATC1;NFATC2;NFATC3;NFATC4	known2.motif	chr3	71127178	71127827	FOXP1	-1.03118	1.13181e-06	intron (NR_146142, intron 6 of 19)	3083	gene_body	-0.400441	0.0779078	0.400441	concordant_down	3	-0.764829	0.0475296	yes	gene_not_significant	TF_down	coherent_activation_loss	active_enhancer	0	1	1	1	1	0	0	1	2	2	2	9	yes	2	EH38D3444301	EH38E2213017	dELS	dELS	EH38E2213017;EH38E3522230
peak_0053521	ATF3	Closing	Atf3	ATF3	known9.motif	chr3	71150235	71150984	FOXP1	-1.09921	1.65575e-05	intron (NR_146142, intron 6 of 19)	-18413	gene_body	-0.400441	0.0779078	0.400441	concordant_down	3	-3.92028	0.000169874	yes	gene_not_significant	TF_down	coherent_activation_loss	active_enhancer	0	1	1	1	1	0	0	0	2	2	2	9	yes	2	EH38D3444341	EH38E2213049	dELS	dELS	EH38E2213049;EH38E2213050
peak_0053521	FOSL1	Closing	Fra1	FOSL1	known4.motif	chr3	71150235	71150984	FOXP1	-1.09921	1.65575e-05	intron (NR_146142, intron 6 of 19)	-18413	gene_body	-0.400441	0.0779078	0.400441	concordant_down	3	-2.84522	0.0038438	yes	gene_not_significant	TF_down	coherent_activation_loss	active_enhancer	0	1	1	1	1	0	0	0	2	2	2	9	yes	2	EH38D3444341	EH38E2213049	dELS	dELS	EH38E2213049;EH38E2213050
peak_0053521	IRF4	Closing	IRF4	IRF4	known28.motif	chr3	71150235	71150984	FOXP1	-1.09921	1.65575e-05	intron (NR_146142, intron 6 of 19)	-18413	gene_body	-0.400441	0.0779078	0.400441	concordant_down	3	-1.96215	1.03297e-08	yes	gene_not_significant	TF_down	coherent_activation_loss	active_enhancer	0	1	1	1	1	0	0	0	2	2	2	9	yes	2	EH38D3444341	EH38E2213049	dELS	dELS	EH38E2213049;EH38E2213050
peak_0053521	NFATC1	Closing	NFAT	NFATC1;NFATC2;NFATC3;NFATC4	known2.motif	chr3	71150235	71150984	FOXP1	-1.09921	1.65575e-05	intron (NR_146142, intron 6 of 19)	-18413	gene_body	-0.400441	0.0779078	0.400441	concordant_down	3	-0.764829	0.0475296	yes	gene_not_significant	TF_down	coherent_activation_loss	active_enhancer	0	1	1	1	1	0	0	0	2	2	2	9	yes	2	EH38D3444341	EH38E2213049	dELS	dELS	EH38E2213049;EH38E2213050
peak_0053521	RFX5	Closing	Rfx5	RFX5	known108.motif	chr3	71150235	71150984	FOXP1	-1.09921	1.65575e-05	intron (NR_146142, intron 6 of 19)	-18413	gene_body	-0.400441	0.0779078	0.400441	concordant_down	3	-0.493972	0.000101039	yes	gene_not_significant	TF_down	coherent_activation_loss	active_enhancer	0	1	1	1	1	0	0	0	2	2	2	9	yes	2	EH38D3444341	EH38E2213049	dELS	dELS	EH38E2213049;EH38E2213050
peak_0053559	NFKB1	Closing	NFkB-p65	NFKB1;RELA;RELB;NFKB2;REL	known10.motif	chr3	71398087	71398607	FOXP1	-1.01266	0.00418833	intron (NR_146142, intron 3 of 19)	-93576	gene_body	-0.400441	0.0779078	0.400441	concordant_down	3	-1.24321	1.12356e-09	yes	gene_not_significant	TF_down	coherent_activation_loss	active_enhancer	0	1	1	1	1	0	0	0	2	2	2	9	yes	2	EH38D3444648	EH38E2213316	dELS	dELS	EH38E2213316;EH38E2213317
peak_0003117	IRF4	Closing	IRF4	IRF4	known28.motif	chr1	77950880	77951162	FUBP1	-1.46599	0.00051834	intron (NM_003902, intron 18 of 19)	28051	gene_body	-0.334194	0.320057	0.334194	concordant_down	3	-1.96215	1.03297e-08	yes	gene_not_significant	TF_down	coherent_activation_loss	active_enhancer	0	1	0	1	1	0	0	1	2	2	2	9	yes	1	EH38D4395102	EH38E2820357	dELS	dELS	EH38E2820357
peak_0003117	NFATC1	Closing	NFAT:AP1	NFATC1;NFATC2;NFATC3;NFATC4;JUN;FOS;BATF	known1.motif	chr1	77950880	77951162	FUBP1	-1.46599	0.00051834	intron (NM_003902, intron 18 of 19)	28051	gene_body	-0.334194	0.320057	0.334194	concordant_down	3	-0.764829	0.0475296	yes	gene_not_significant	TF_down	coherent_activation_loss	active_enhancer	0	1	0	1	1	0	0	1	2	2	2	9	yes	1	EH38D4395102	EH38E2820357	dELS	dELS	EH38E2820357
peak_0052690	NFATC1	Closing	NFAT	NFATC1;NFATC2;NFATC3;NFATC4	known2.motif	chr3	45992272	45992595	FYCO1	-1.04144	0.00142274	intron (NM_024513, intron 1 of 17)	3390	gene_body	-0.456411	0.00021929	0.456411	concordant_down	3	-0.764829	0.0475296	yes	gene_down	TF_down	coherent_activation_loss	active_enhancer	0	1	1	1	1	0	0	0	2	2	2	9	yes	2	EH38D3421956	EH38E2197781	dELS	dELS	EH38E2197781;EH38E3510113
peak_0071457	NFATC1	Closing	NFAT:AP1	NFATC1;NFATC2;NFATC3;NFATC4;JUN;FOS;BATF	known1.motif	chr7	91151806	91152233	FZD1	-1.6722	1.13239e-08	intron (NM_012395, intron 13 of 13)	-112413	gene_body	-0.148102	1	0.148102	concordant_down	3	-0.764829	0.0475296	yes	gene_not_significant	TF_down	coherent_activation_loss	active_enhancer	0	1	0	1	1	0	0	0	2	2	2	9	yes	1	EH38D4001097	EH38E2570828	dELS	dELS	EH38E2570828
peak_0071457	NFATC1	Closing	NFAT	NFATC1;NFATC2;NFATC3;NFATC4	known2.motif	chr7	91151806	91152233	FZD1	-1.6722	1.13239e-08	intron (NM_012395, intron 13 of 13)	-112413	gene_body	-0.148102	1	0.148102	concordant_down	3	-0.764829	0.0475296	yes	gene_not_significant	TF_down	coherent_activation_loss	active_enhancer	0	1	0	1	1	0	0	0	2	2	2	9	yes	1	EH38D4001097	EH38E2570828	dELS	dELS	EH38E2570828
peak_0071457	RFX5	Closing	Rfx5	RFX5	known108.motif	chr7	91151806	91152233	FZD1	-1.6722	1.13239e-08	intron (NM_012395, intron 13 of 13)	-112413	gene_body	-0.148102	1	0.148102	concordant_down	3	-0.493972	0.000101039	yes	gene_not_significant	TF_down	coherent_activation_loss	active_enhancer	0	1	0	1	1	0	0	0	2	2	2	9	yes	1	EH38D4001097	EH38E2570828	dELS	dELS	EH38E2570828
peak_0003457	ATF3	Closing	Atf3	ATF3	known9.motif	chr1	92536712	92537525	GFI1	-1.50726	3.08669e-09	intron (NM_001350198, intron 19 of 19)	-50194	gene_body	-1.89911	0.253584	1.89911	concordant_down	3	-3.92028	0.000169874	yes	gene_not_significant	TF_down	coherent_activation_loss	active_enhancer	0	1	1	1	1	0	0	0	2	2	2	9	yes	3	EH38D2197223	EH38E1367615	dELS	dELS	EH38E1367615;EH38E2824770;EH38E2824771
peak_0003457	FOSL1	Closing	Fra1	FOSL1	known4.motif	chr1	92536712	92537525	GFI1	-1.50726	3.08669e-09	intron (NM_001350198, intron 19 of 19)	-50194	gene_body	-1.89911	0.253584	1.89911	concordant_down	3	-2.84522	0.0038438	yes	gene_not_significant	TF_down	coherent_activation_loss	active_enhancer	0	1	1	1	1	0	0	0	2	2	2	9	yes	3	EH38D2197223	EH38E1367615	dELS	dELS	EH38E1367615;EH38E2824770;EH38E2824771
peak_0003457	FOSL2	Closing	Fra2	FOSL2	known11.motif	chr1	92536712	92537525	GFI1	-1.50726	3.08669e-09	intron (NM_001350198, intron 19 of 19)	-50194	gene_body	-1.89911	0.253584	1.89911	concordant_down	3	-2.94385	0.00157751	yes	gene_not_significant	TF_down	coherent_activation_loss	active_enhancer	0	1	1	1	1	0	0	0	2	2	2	9	yes	3	EH38D2197223	EH38E1367615	dELS	dELS	EH38E1367615;EH38E2824770;EH38E2824771
peak_0003457	FOSL2	Closing	Fosl2	FOSL2	known8.motif	chr1	92536712	92537525	GFI1	-1.50726	3.08669e-09	intron (NM_001350198, intron 19 of 19)	-50194	gene_body	-1.89911	0.253584	1.89911	concordant_down	3	-2.94385	0.00157751	yes	gene_not_significant	TF_down	coherent_activation_loss	active_enhancer	0	1	1	1	1	0	0	0	2	2	2	9	yes	3	EH38D2197223	EH38E1367615	dELS	dELS	EH38E1367615;EH38E2824770;EH38E2824771
peak_0003457	NFATC1	Closing	NFAT	NFATC1;NFATC2;NFATC3;NFATC4	known2.motif	chr1	92536712	92537525	GFI1	-1.50726	3.08669e-09	intron (NM_001350198, intron 19 of 19)	-50194	gene_body	-1.89911	0.253584	1.89911	concordant_down	3	-0.764829	0.0475296	yes	gene_not_significant	TF_down	coherent_activation_loss	active_enhancer	0	1	1	1	1	0	0	0	2	2	2	9	yes	3	EH38D2197223	EH38E1367615	dELS	dELS	EH38E1367615;EH38E2824770;EH38E2824771
peak_0003457	TFE3	Closing	TFE3	TFE3	known133.motif	chr1	92536712	92537525	GFI1	-1.50726	3.08669e-09	intron (NM_001350198, intron 19 of 19)	-50194	gene_body	-1.89911	0.253584	1.89911	concordant_down	3	-0.309485	0.00608454	yes	gene_not_significant	TF_down	coherent_activation_loss	active_enhancer	0	1	1	1	1	0	0	0	2	2	2	9	yes	3	EH38D2197223	EH38E1367615	dELS	dELS	EH38E1367615;EH38E2824770;EH38E2824771
peak_0064262	NFATC1	Closing	NFAT:AP1	NFATC1;NFATC2;NFATC3;NFATC4;JUN;FOS;BATF	known1.motif	chr6	2241651	2241984	GMDS	-1.5446	2.92121e-09	intron (NM_001500, intron 1 of 10)	3787	gene_body	-0.650685	0.0158574	0.650685	concordant_down	3	-0.764829	0.0475296	yes	gene_down	TF_down	coherent_activation_loss	active_enhancer	0	1	1	1	1	0	0	0	2	2	2	9	yes	1	EH38D6398585	EH38E4392496	dELS	dELS	EH38E4392496
peak_0064262	NFATC1	Closing	NFAT	NFATC1;NFATC2;NFATC3;NFATC4	known2.motif	chr6	2241651	2241984	GMDS	-1.5446	2.92121e-09	intron (NM_001500, intron 1 of 10)	3787	gene_body	-0.650685	0.0158574	0.650685	concordant_down	3	-0.764829	0.0475296	yes	gene_down	TF_down	coherent_activation_loss	active_enhancer	0	1	1	1	1	0	0	0	2	2	2	9	yes	1	EH38D6398585	EH38E4392496	dELS	dELS	EH38E4392496
peak_0066267	ATF3	Closing	Atf3	ATF3	known9.motif	chr6	52976330	52977340	GSTA4	-1.55533	7.48208e-08	Intergenic	18449	distal	-3.10992	6.13005e-09	3.10992	concordant_down	3	-3.92028	0.000169874	yes	gene_down	TF_down	coherent_activation_loss	active_enhancer	0	0	0	1	1	0	0	0	2	2	2	9	yes	3	EH38D5760875	EH38E3712750	dELS	dELS	EH38E3712750;EH38E3712751;EH38E3712752
peak_0066267	FOSL1	Closing	Fra1	FOSL1	known4.motif	chr6	52976330	52977340	GSTA4	-1.55533	7.48208e-08	Intergenic	18449	distal	-3.10992	6.13005e-09	3.10992	concordant_down	3	-2.84522	0.0038438	yes	gene_down	TF_down	coherent_activation_loss	active_enhancer	0	0	0	1	1	0	0	0	2	2	2	9	yes	3	EH38D5760875	EH38E3712750	dELS	dELS	EH38E3712750;EH38E3712751;EH38E3712752
peak_0066267	FOSL2	Closing	Fra2	FOSL2	known11.motif	chr6	52976330	52977340	GSTA4	-1.55533	7.48208e-08	Intergenic	18449	distal	-3.10992	6.13005e-09	3.10992	concordant_down	3	-2.94385	0.00157751	yes	gene_down	TF_down	coherent_activation_loss	active_enhancer	0	0	0	1	1	0	0	0	2	2	2	9	yes	3	EH38D5760875	EH38E3712750	dELS	dELS	EH38E3712750;EH38E3712751;EH38E3712752
peak_0066267	FOSL2	Closing	Fosl2	FOSL2	known8.motif	chr6	52976330	52977340	GSTA4	-1.55533	7.48208e-08	Intergenic	18449	distal	-3.10992	6.13005e-09	3.10992	concordant_down	3	-2.94385	0.00157751	yes	gene_down	TF_down	coherent_activation_loss	active_enhancer	0	0	0	1	1	0	0	0	2	2	2	9	yes	3	EH38D5760875	EH38E3712750	dELS	dELS	EH38E3712750;EH38E3712751;EH38E3712752
peak_0066267	NFATC1	Closing	NFAT	NFATC1;NFATC2;NFATC3;NFATC4	known2.motif	chr6	52976330	52977340	GSTA4	-1.55533	7.48208e-08	Intergenic	18449	distal	-3.10992	6.13005e-09	3.10992	concordant_down	3	-0.764829	0.0475296	yes	gene_down	TF_down	coherent_activation_loss	active_enhancer	0	0	0	1	1	0	0	0	2	2	2	9	yes	3	EH38D5760875	EH38E3712750	dELS	dELS	EH38E3712750;EH38E3712751;EH38E3712752
peak_0043519	NFATC1	Closing	NFAT:AP1	NFATC1;NFATC2;NFATC3;NFATC4;JUN;FOS;BATF	known1.motif	chr2	144424550	144424989	GTDC1	-1.01873	0.00299752	intron (NM_001171653, intron 3 of 8)	-91701	gene_body	-0.720108	0.207127	0.720108	concordant_down	3	-0.764829	0.0475296	yes	gene_not_significant	TF_down	coherent_activation_loss	active_enhancer	0	1	0	1	1	0	0	1	2	2	2	9	yes	2	EH38D5242630	EH38E3375769	dELS	dELS	EH38E3375769;EH38E3375770
peak_0038986	IRF4	Closing	IRF4	IRF4	known28.motif	chr19	48987125	48987943	GYS1	-1.53284	9.52667e-11	intron (NR_027763, intron 1 of 14)	5775	gene_body	-0.931986	1.44844e-07	0.931986	concordant_down	3	-1.96215	1.03297e-08	yes	gene_down	TF_down	coherent_activation_loss	active_enhancer	0	1	0	1	1	0	0	1	2	2	2	9	yes	3	EH38D5143983	EH38E3312856	dELS	dELS	EH38E3312856;EH38E3312857;EH38E4201380
peak_0038986	NFATC1	Closing	NFAT:AP1	NFATC1;NFATC2;NFATC3;NFATC4;JUN;FOS;BATF	known1.motif	chr19	48987125	48987943	GYS1	-1.53284	9.52667e-11	intron (NR_027763, intron 1 of 14)	5775	gene_body	-0.931986	1.44844e-07	0.931986	concordant_down	3	-0.764829	0.0475296	yes	gene_down	TF_down	coherent_activation_loss	active_enhancer	0	1	0	1	1	0	0	1	2	2	2	9	yes	3	EH38D5143983	EH38E3312856	dELS	dELS	EH38E3312856;EH38E3312857;EH38E4201380
peak_0038986	NFATC1	Closing	NFAT	NFATC1;NFATC2;NFATC3;NFATC4	known2.motif	chr19	48987125	48987943	GYS1	-1.53284	9.52667e-11	intron (NR_027763, intron 1 of 14)	5775	gene_body	-0.931986	1.44844e-07	0.931986	concordant_down	3	-0.764829	0.0475296	yes	gene_down	TF_down	coherent_activation_loss	active_enhancer	0	1	0	1	1	0	0	1	2	2	2	9	yes	3	EH38D5143983	EH38E3312856	dELS	dELS	EH38E3312856;EH38E3312857;EH38E4201380
peak_0068046	IRF4	Closing	IRF4	IRF4	known28.motif	chr6	142811022	142811684	HIVEP2	-1.2641	0.000311453	intron (NM_006734, intron 2 of 9)	133823	gene_body	-0.504229	0.0618283	0.504229	concordant_down	3	-1.96215	1.03297e-08	yes	gene_not_significant	TF_down	coherent_activation_loss	active_enhancer	0	1	0	1	1	0	0	1	2	2	2	9	yes	2	EH38D5799570	EH38E3737455	dELS	dELS	EH38E3737455;EH38E3737456
peak_0068046	NFKB1	Closing	NFkB-p65	NFKB1;RELA;RELB;NFKB2;REL	known10.motif	chr6	142811022	142811684	HIVEP2	-1.2641	0.000311453	intron (NM_006734, intron 2 of 9)	133823	gene_body	-0.504229	0.0618283	0.504229	concordant_down	3	-1.24321	1.12356e-09	yes	gene_not_significant	TF_down	coherent_activation_loss	active_enhancer	0	1	0	1	1	0	0	1	2	2	2	9	yes	2	EH38D5799570	EH38E3737455	dELS	dELS	EH38E3737455;EH38E3737456
peak_0027243	ATF3	Closing	Atf3	ATF3	known9.motif	chr15	99324049	99324581	HSP90B2P	-1.72358	5.56097e-06	intron (NM_001321676, intron 6 of 10)	66790	gene_body	-0.427885	1	0.427885	concordant_down	3	-3.92028	0.000169874	yes	gene_not_significant	TF_down	coherent_activation_loss	active_enhancer	0	1	0	1	1	0	0	0	2	2	2	9	yes	2	EH38D2831543	EH38E1792484	dELS	dELS	EH38E1792484;EH38E3158306
peak_0027243	FOSL1	Closing	Fra1	FOSL1	known4.motif	chr15	99324049	99324581	HSP90B2P	-1.72358	5.56097e-06	intron (NM_001321676, intron 6 of 10)	66790	gene_body	-0.427885	1	0.427885	concordant_down	3	-2.84522	0.0038438	yes	gene_not_significant	TF_down	coherent_activation_loss	active_enhancer	0	1	0	1	1	0	0	0	2	2	2	9	yes	2	EH38D2831543	EH38E1792484	dELS	dELS	EH38E1792484;EH38E3158306
peak_0027243	FOSL2	Closing	Fra2	FOSL2	known11.motif	chr15	99324049	99324581	HSP90B2P	-1.72358	5.56097e-06	intron (NM_001321676, intron 6 of 10)	66790	gene_body	-0.427885	1	0.427885	concordant_down	3	-2.94385	0.00157751	yes	gene_not_significant	TF_down	coherent_activation_loss	active_enhancer	0	1	0	1	1	0	0	0	2	2	2	9	yes	2	EH38D2831543	EH38E1792484	dELS	dELS	EH38E1792484;EH38E3158306
peak_0027243	IRF4	Closing	IRF4	IRF4	known28.motif	chr15	99324049	99324581	HSP90B2P	-1.72358	5.56097e-06	intron (NM_001321676, intron 6 of 10)	66790	gene_body	-0.427885	1	0.427885	concordant_down	3	-1.96215	1.03297e-08	yes	gene_not_significant	TF_down	coherent_activation_loss	active_enhancer	0	1	0	1	1	0	0	0	2	2	2	9	yes	2	EH38D2831543	EH38E1792484	dELS	dELS	EH38E1792484;EH38E3158306
peak_0027243	NFATC1	Closing	NFAT	NFATC1;NFATC2;NFATC3;NFATC4	known2.motif	chr15	99324049	99324581	HSP90B2P	-1.72358	5.56097e-06	intron (NM_001321676, intron 6 of 10)	66790	gene_body	-0.427885	1	0.427885	concordant_down	3	-0.764829	0.0475296	yes	gene_not_significant	TF_down	coherent_activation_loss	active_enhancer	0	1	0	1	1	0	0	0	2	2	2	9	yes	2	EH38D2831543	EH38E1792484	dELS	dELS	EH38E1792484;EH38E3158306
peak_0027243	NFKB1	Closing	NFkB-p65	NFKB1;RELA;RELB;NFKB2;REL	known10.motif	chr15	99324049	99324581	HSP90B2P	-1.72358	5.56097e-06	intron (NM_001321676, intron 6 of 10)	66790	gene_body	-0.427885	1	0.427885	concordant_down	3	-1.24321	1.12356e-09	yes	gene_not_significant	TF_down	coherent_activation_loss	active_enhancer	0	1	0	1	1	0	0	0	2	2	2	9	yes	2	EH38D2831543	EH38E1792484	dELS	dELS	EH38E1792484;EH38E3158306
peak_0006593	NFATC1	Closing	NFAT:AP1	NFATC1;NFATC2;NFATC3;NFATC4;JUN;FOS;BATF	known1.motif	chr1	206790485	206791089	IL10	-1.21474	2.6504e-07	intron (NM_153758, intron 1 of 6)	-18293	gene_body	-0.621475	1	0.621475	concordant_down	3	-0.764829	0.0475296	yes	gene_not_significant	TF_down	coherent_activation_loss	active_enhancer	0	1	1	1	1	0	0	0	2	2	2	9	yes	2	EH38D2267927	EH38E1416500	dELS	dELS	EH38E1416500;EH38E3990172
peak_0006593	NFATC1	Closing	NFAT	NFATC1;NFATC2;NFATC3;NFATC4	known2.motif	chr1	206790485	206791089	IL10	-1.21474	2.6504e-07	intron (NM_153758, intron 1 of 6)	-18293	gene_body	-0.621475	1	0.621475	concordant_down	3	-0.764829	0.0475296	yes	gene_not_significant	TF_down	coherent_activation_loss	active_enhancer	0	1	1	1	1	0	0	0	2	2	2	9	yes	2	EH38D2267927	EH38E1416500	dELS	dELS	EH38E1416500;EH38E3990172
peak_0006593	NFKB1	Closing	NFkB-p65	NFKB1;RELA;RELB;NFKB2;REL	known10.motif	chr1	206790485	206791089	IL10	-1.21474	2.6504e-07	intron (NM_153758, intron 1 of 6)	-18293	gene_body	-0.621475	1	0.621475	concordant_down	3	-1.24321	1.12356e-09	yes	gene_not_significant	TF_down	coherent_activation_loss	active_enhancer	0	1	1	1	1	0	0	0	2	2	2	9	yes	2	EH38D2267927	EH38E1416500	dELS	dELS	EH38E1416500;EH38E3990172
peak_0006595	NFATC1	Closing	NFAT	NFATC1;NFATC2;NFATC3;NFATC4	known2.motif	chr1	206794461	206795226	IL10	-1.04008	2.06663e-05	intron (NM_153758, intron 1 of 6)	-22350	gene_body	-0.621475	1	0.621475	concordant_down	3	-0.764829	0.0475296	yes	gene_not_significant	TF_down	coherent_activation_loss	active_enhancer	0	1	1	1	1	0	0	0	2	2	2	9	yes	1	EH38D4456325	EH38E2861998	dELS	dELS	EH38E2861998
peak_0006595	NFKB1	Closing	NFkB-p65	NFKB1;RELA;RELB;NFKB2;REL	known10.motif	chr1	206794461	206795226	IL10	-1.04008	2.06663e-05	intron (NM_153758, intron 1 of 6)	-22350	gene_body	-0.621475	1	0.621475	concordant_down	3	-1.24321	1.12356e-09	yes	gene_not_significant	TF_down	coherent_activation_loss	active_enhancer	0	1	1	1	1	0	0	0	2	2	2	9	yes	1	EH38D4456325	EH38E2861998	dELS	dELS	EH38E2861998
peak_0006595	NFKB1	Closing	NFkB-p50,p52	NFKB1;NFKB2	known13.motif	chr1	206794461	206795226	IL10	-1.04008	2.06663e-05	intron (NM_153758, intron 1 of 6)	-22350	gene_body	-0.621475	1	0.621475	concordant_down	3	-1.24321	1.12356e-09	yes	gene_not_significant	TF_down	coherent_activation_loss	active_enhancer	0	1	1	1	1	0	0	0	2	2	2	9	yes	1	EH38D4456325	EH38E2861998	dELS	dELS	EH38E2861998
peak_0042587	ATF3	Closing	Atf3	ATF3	known9.motif	chr2	102082653	102083555	IL1R1	-1.26444	4.80323e-06	intron (NM_001320978, intron 1 of 11)	12714	gene_body	-1.05353	1	1.05353	concordant_down	3	-3.92028	0.000169874	yes	gene_not_significant	TF_down	coherent_activation_loss	active_enhancer	0	1	1	1	1	0	0	0	2	2	2	9	yes	4	EH38D3157929	EH38E2020393	dELS	dELS	EH38E2020393;EH38E3361413;EH38E3361414;EH38E4224679
peak_0042587	FOSL1	Closing	Fra1	FOSL1	known4.motif	chr2	102082653	102083555	IL1R1	-1.26444	4.80323e-06	intron (NM_001320978, intron 1 of 11)	12714	gene_body	-1.05353	1	1.05353	concordant_down	3	-2.84522	0.0038438	yes	gene_not_significant	TF_down	coherent_activation_loss	active_enhancer	0	1	1	1	1	0	0	0	2	2	2	9	yes	4	EH38D3157929	EH38E2020393	dELS	dELS	EH38E2020393;EH38E3361413;EH38E3361414;EH38E4224679
peak_0042587	FOSL2	Closing	Fra2	FOSL2	known11.motif	chr2	102082653	102083555	IL1R1	-1.26444	4.80323e-06	intron (NM_001320978, intron 1 of 11)	12714	gene_body	-1.05353	1	1.05353	concordant_down	3	-2.94385	0.00157751	yes	gene_not_significant	TF_down	coherent_activation_loss	active_enhancer	0	1	1	1	1	0	0	0	2	2	2	9	yes	4	EH38D3157929	EH38E2020393	dELS	dELS	EH38E2020393;EH38E3361413;EH38E3361414;EH38E4224679
peak_0042587	FOSL2	Closing	Fosl2	FOSL2	known8.motif	chr2	102082653	102083555	IL1R1	-1.26444	4.80323e-06	intron (NM_001320978, intron 1 of 11)	12714	gene_body	-1.05353	1	1.05353	concordant_down	3	-2.94385	0.00157751	yes	gene_not_significant	TF_down	coherent_activation_loss	active_enhancer	0	1	1	1	1	0	0	0	2	2	2	9	yes	4	EH38D3157929	EH38E2020393	dELS	dELS	EH38E2020393;EH38E3361413;EH38E3361414;EH38E4224679
peak_0042587	NFKB1	Closing	NFkB-p65	NFKB1;RELA;RELB;NFKB2;REL	known10.motif	chr2	102082653	102083555	IL1R1	-1.26444	4.80323e-06	intron (NM_001320978, intron 1 of 11)	12714	gene_body	-1.05353	1	1.05353	concordant_down	3	-1.24321	1.12356e-09	yes	gene_not_significant	TF_down	coherent_activation_loss	active_enhancer	0	1	1	1	1	0	0	0	2	2	2	9	yes	4	EH38D3157929	EH38E2020393	dELS	dELS	EH38E2020393;EH38E3361413;EH38E3361414;EH38E4224679
peak_0042587	RFX5	Closing	Rfx5	RFX5	known108.motif	chr2	102082653	102083555	IL1R1	-1.26444	4.80323e-06	intron (NM_001320978, intron 1 of 11)	12714	gene_body	-1.05353	1	1.05353	concordant_down	3	-0.493972	0.000101039	yes	gene_not_significant	TF_down	coherent_activation_loss	active_enhancer	0	1	1	1	1	0	0	0	2	2	2	9	yes	4	EH38D3157929	EH38E2020393	dELS	dELS	EH38E2020393;EH38E3361413;EH38E3361414;EH38E4224679
peak_0042587	TFE3	Closing	TFE3	TFE3	known133.motif	chr2	102082653	102083555	IL1R1	-1.26444	4.80323e-06	intron (NM_001320978, intron 1 of 11)	12714	gene_body	-1.05353	1	1.05353	concordant_down	3	-0.309485	0.00608454	yes	gene_not_significant	TF_down	coherent_activation_loss	active_enhancer	0	1	1	1	1	0	0	0	2	2	2	9	yes	4	EH38D3157929	EH38E2020393	dELS	dELS	EH38E2020393;EH38E3361413;EH38E3361414;EH38E4224679
peak_0004771	ATF3	Closing	Atf3	ATF3	known9.motif	chr1	154439460	154440529	IL6R-AS1	-1.06506	2.56985e-05	intron (NM_000565, intron 6 of 9)	-33431	gene_body	-1.14149	0.708341	1.14149	concordant_down	3	-3.92028	0.000169874	yes	gene_not_significant	TF_down	coherent_activation_loss	active_enhancer	0	1	0	1	1	0	0	0	2	2	2	9	yes	3	EH38D2224506	EH38E1386150	dELS	dELS	EH38E1386150;EH38E2839111;EH38E2839112
peak_0004771	FOSL1	Closing	Fra1	FOSL1	known4.motif	chr1	154439460	154440529	IL6R-AS1	-1.06506	2.56985e-05	intron (NM_000565, intron 6 of 9)	-33431	gene_body	-1.14149	0.708341	1.14149	concordant_down	3	-2.84522	0.0038438	yes	gene_not_significant	TF_down	coherent_activation_loss	active_enhancer	0	1	0	1	1	0	0	0	2	2	2	9	yes	3	EH38D2224506	EH38E1386150	dELS	dELS	EH38E1386150;EH38E2839111;EH38E2839112
peak_0004771	FOSL2	Closing	Fra2	FOSL2	known11.motif	chr1	154439460	154440529	IL6R-AS1	-1.06506	2.56985e-05	intron (NM_000565, intron 6 of 9)	-33431	gene_body	-1.14149	0.708341	1.14149	concordant_down	3	-2.94385	0.00157751	yes	gene_not_significant	TF_down	coherent_activation_loss	active_enhancer	0	1	0	1	1	0	0	0	2	2	2	9	yes	3	EH38D2224506	EH38E1386150	dELS	dELS	EH38E1386150;EH38E2839111;EH38E2839112
peak_0004771	IRF4	Closing	IRF4	IRF4	known28.motif	chr1	154439460	154440529	IL6R-AS1	-1.06506	2.56985e-05	intron (NM_000565, intron 6 of 9)	-33431	gene_body	-1.14149	0.708341	1.14149	concordant_down	3	-1.96215	1.03297e-08	yes	gene_not_significant	TF_down	coherent_activation_loss	active_enhancer	0	1	0	1	1	0	0	0	2	2	2	9	yes	3	EH38D2224506	EH38E1386150	dELS	dELS	EH38E1386150;EH38E2839111;EH38E2839112
peak_0004771	NFATC1	Closing	NFAT:AP1	NFATC1;NFATC2;NFATC3;NFATC4;JUN;FOS;BATF	known1.motif	chr1	154439460	154440529	IL6R-AS1	-1.06506	2.56985e-05	intron (NM_000565, intron 6 of 9)	-33431	gene_body	-1.14149	0.708341	1.14149	concordant_down	3	-0.764829	0.0475296	yes	gene_not_significant	TF_down	coherent_activation_loss	active_enhancer	0	1	0	1	1	0	0	0	2	2	2	9	yes	3	EH38D2224506	EH38E1386150	dELS	dELS	EH38E1386150;EH38E2839111;EH38E2839112
peak_0072160	FOSL1	Closing	Fra1	FOSL1	known4.motif	chr7	111532051	111532486	IMMP2L	-1.03387	0.00704434	intron (NM_032549, intron 1 of 5)	30022	gene_body	-0.793008	0.0364055	0.793008	concordant_down	3	-2.84522	0.0038438	yes	gene_down	TF_down	coherent_activation_loss	active_enhancer	0	1	1	1	1	0	0	0	2	2	2	9	yes	2	EH38D4017023	EH38E2581775	dELS	dELS	EH38E2581775;EH38E3793847
peak_0072160	NFATC1	Closing	NFAT	NFATC1;NFATC2;NFATC3;NFATC4	known2.motif	chr7	111532051	111532486	IMMP2L	-1.03387	0.00704434	intron (NM_032549, intron 1 of 5)	30022	gene_body	-0.793008	0.0364055	0.793008	concordant_down	3	-0.764829	0.0475296	yes	gene_down	TF_down	coherent_activation_loss	active_enhancer	0	1	1	1	1	0	0	0	2	2	2	9	yes	2	EH38D4017023	EH38E2581775	dELS	dELS	EH38E2581775;EH38E3793847
peak_0046584	ATF3	Closing	Atf3	ATF3	known9.motif	chr20	20490880	20491654	INSM1	-1.63453	1.96774e-09	intron (NM_020343, intron 36 of 39)	123163	gene_body	-0.0299559	1	0.0299559	concordant_down	3	-3.92028	0.000169874	yes	gene_not_significant	TF_down	coherent_activation_loss	active_enhancer	0	1	0	1	1	0	0	0	2	2	2	9	yes	3	EH38D3285609	EH38E2102670	dELS	dELS	EH38E2102670;EH38E3423465;EH38E3423466
peak_0046584	FOSL1	Closing	Fra1	FOSL1	known4.motif	chr20	20490880	20491654	INSM1	-1.63453	1.96774e-09	intron (NM_020343, intron 36 of 39)	123163	gene_body	-0.0299559	1	0.0299559	concordant_down	3	-2.84522	0.0038438	yes	gene_not_significant	TF_down	coherent_activation_loss	active_enhancer	0	1	0	1	1	0	0	0	2	2	2	9	yes	3	EH38D3285609	EH38E2102670	dELS	dELS	EH38E2102670;EH38E3423465;EH38E3423466
peak_0046584	FOSL2	Closing	Fra2	FOSL2	known11.motif	chr20	20490880	20491654	INSM1	-1.63453	1.96774e-09	intron (NM_020343, intron 36 of 39)	123163	gene_body	-0.0299559	1	0.0299559	concordant_down	3	-2.94385	0.00157751	yes	gene_not_significant	TF_down	coherent_activation_loss	active_enhancer	0	1	0	1	1	0	0	0	2	2	2	9	yes	3	EH38D3285609	EH38E2102670	dELS	dELS	EH38E2102670;EH38E3423465;EH38E3423466
peak_0046584	NFATC1	Closing	NFAT	NFATC1;NFATC2;NFATC3;NFATC4	known2.motif	chr20	20490880	20491654	INSM1	-1.63453	1.96774e-09	intron (NM_020343, intron 36 of 39)	123163	gene_body	-0.0299559	1	0.0299559	concordant_down	3	-0.764829	0.0475296	yes	gene_not_significant	TF_down	coherent_activation_loss	active_enhancer	0	1	0	1	1	0	0	0	2	2	2	9	yes	3	EH38D3285609	EH38E2102670	dELS	dELS	EH38E2102670;EH38E3423465;EH38E3423466
peak_0021386	EGR2	Closing	Egr2	EGR2	known16.motif	chr13	51416069	51416405	INTS6	-1.18651	1.72688e-05	intron (NM_012141, intron 4 of 17)	36799	gene_body	-0.405638	0.00138079	0.405638	concordant_down	3	-5.0555	5.55296e-22	yes	gene_down	TF_down	coherent_activation_loss	active_enhancer	0	1	0	1	1	0	0	0	2	2	2	9	yes	1	EH38D4768149	EH38E3067088	dELS	dELS	EH38E3067088
peak_0028745	IRF4	Closing	IRF4	IRF4	known28.motif	chr16	31364976	31365790	ITGAX	-1.15297	6.53013e-05	intron (NM_000887, intron 14 of 29)	10207	gene_body	-0.196951	1	0.196951	concordant_down	3	-1.96215	1.03297e-08	yes	gene_not_significant	TF_down	coherent_activation_loss	active_enhancer	0	1	0	1	1	0	0	0	2	2	2	9	yes	2	EH38D4940668	EH38E3177682	dELS	dELS	EH38E3177682;EH38E4141514
peak_0028745	NFKB1	Closing	NFkB-p65	NFKB1;RELA;RELB;NFKB2;REL	known10.motif	chr16	31364976	31365790	ITGAX	-1.15297	6.53013e-05	intron (NM_000887, intron 14 of 29)	10207	gene_body	-0.196951	1	0.196951	concordant_down	3	-1.24321	1.12356e-09	yes	gene_not_significant	TF_down	coherent_activation_loss	active_enhancer	0	1	0	1	1	0	0	0	2	2	2	9	yes	2	EH38D4940668	EH38E3177682	dELS	dELS	EH38E3177682;EH38E4141514
peak_0028745	NFKB1	Closing	NFkB-p50,p52	NFKB1;NFKB2	known13.motif	chr16	31364976	31365790	ITGAX	-1.15297	6.53013e-05	intron (NM_000887, intron 14 of 29)	10207	gene_body	-0.196951	1	0.196951	concordant_down	3	-1.24321	1.12356e-09	yes	gene_not_significant	TF_down	coherent_activation_loss	active_enhancer	0	1	0	1	1	0	0	0	2	2	2	9	yes	2	EH38D4940668	EH38E3177682	dELS	dELS	EH38E3177682;EH38E4141514
peak_0028745	RFX5	Closing	Rfx5	RFX5	known108.motif	chr16	31364976	31365790	ITGAX	-1.15297	6.53013e-05	intron (NM_000887, intron 14 of 29)	10207	gene_body	-0.196951	1	0.196951	concordant_down	3	-0.493972	0.000101039	yes	gene_not_significant	TF_down	coherent_activation_loss	active_enhancer	0	1	0	1	1	0	0	0	2	2	2	9	yes	2	EH38D4940668	EH38E3177682	dELS	dELS	EH38E3177682;EH38E4141514
peak_0007212	NFATC1	Closing	NFAT	NFATC1;NFATC2;NFATC3;NFATC4	known2.motif	chr1	226692078	226692231	ITPKB-IT1	-1.43793	0.000731393	intron (NM_002221, intron 2 of 7)	-17087	gene_body	-0.389861	1	0.389861	concordant_down	3	-0.764829	0.0475296	yes	gene_not_significant	TF_down	coherent_activation_loss	active_enhancer	0	1	1	1	1	0	0	0	2	2	2	9	yes	1	EH38D2284917	EH38E1427961	dELS	dELS	EH38E1427961
peak_0070082	ATF3	Closing	Atf3	ATF3	known9.motif	chr7	28037299	28037560	JAZF1-AS1	-1.21992	0.0020985	intron (NM_175061, intron 1 of 4)	-143027	gene_body	-0.948559	9.88587e-05	0.948559	concordant_down	3	-3.92028	0.000169874	yes	gene_down	TF_down	coherent_activation_loss	active_enhancer	0	1	0	1	1	0	0	0	2	2	2	9	yes	1	EH38D5839968	EH38E3764146	dELS	dELS	EH38E3764146
peak_0070082	FOSL1	Closing	Fra1	FOSL1	known4.motif	chr7	28037299	28037560	JAZF1-AS1	-1.21992	0.0020985	intron (NM_175061, intron 1 of 4)	-143027	gene_body	-0.948559	9.88587e-05	0.948559	concordant_down	3	-2.84522	0.0038438	yes	gene_down	TF_down	coherent_activation_loss	active_enhancer	0	1	0	1	1	0	0	0	2	2	2	9	yes	1	EH38D5839968	EH38E3764146	dELS	dELS	EH38E3764146
peak_0070082	FOSL2	Closing	Fra2	FOSL2	known11.motif	chr7	28037299	28037560	JAZF1-AS1	-1.21992	0.0020985	intron (NM_175061, intron 1 of 4)	-143027	gene_body	-0.948559	9.88587e-05	0.948559	concordant_down	3	-2.94385	0.00157751	yes	gene_down	TF_down	coherent_activation_loss	active_enhancer	0	1	0	1	1	0	0	0	2	2	2	9	yes	1	EH38D5839968	EH38E3764146	dELS	dELS	EH38E3764146
peak_0070082	FOSL2	Closing	Fosl2	FOSL2	known8.motif	chr7	28037299	28037560	JAZF1-AS1	-1.21992	0.0020985	intron (NM_175061, intron 1 of 4)	-143027	gene_body	-0.948559	9.88587e-05	0.948559	concordant_down	3	-2.94385	0.00157751	yes	gene_down	TF_down	coherent_activation_loss	active_enhancer	0	1	0	1	1	0	0	0	2	2	2	9	yes	1	EH38D5839968	EH38E3764146	dELS	dELS	EH38E3764146
peak_0070082	NFATC1	Closing	NFAT:AP1	NFATC1;NFATC2;NFATC3;NFATC4;JUN;FOS;BATF	known1.motif	chr7	28037299	28037560	JAZF1-AS1	-1.21992	0.0020985	intron (NM_175061, intron 1 of 4)	-143027	gene_body	-0.948559	9.88587e-05	0.948559	concordant_down	3	-0.764829	0.0475296	yes	gene_down	TF_down	coherent_activation_loss	active_enhancer	0	1	0	1	1	0	0	0	2	2	2	9	yes	1	EH38D5839968	EH38E3764146	dELS	dELS	EH38E3764146
peak_0070092	ATF3	Closing	Atf3	ATF3	known9.motif	chr7	28149438	28150195	JAZF1-AS1	-1.14316	2.26504e-10	intron (NM_175061, intron 1 of 4)	-30640	gene_body	-0.948559	9.88587e-05	0.948559	concordant_down	3	-3.92028	0.000169874	yes	gene_down	TF_down	coherent_activation_loss	active_enhancer	0	1	1	1	1	0	0	0	2	2	2	9	yes	2	EH38D3958996	EH38E2543427	dELS	dELS	EH38E2543427;EH38E3764225
peak_0070092	NFATC1	Closing	NFAT	NFATC1;NFATC2;NFATC3;NFATC4	known2.motif	chr7	28149438	28150195	JAZF1-AS1	-1.14316	2.26504e-10	intron (NM_175061, intron 1 of 4)	-30640	gene_body	-0.948559	9.88587e-05	0.948559	concordant_down	3	-0.764829	0.0475296	yes	gene_down	TF_down	coherent_activation_loss	active_enhancer	0	1	1	1	1	0	0	0	2	2	2	9	yes	2	EH38D3958996	EH38E2543427	dELS	dELS	EH38E2543427;EH38E3764225
peak_0070092	NFKB1	Closing	NFkB-p65	NFKB1;RELA;RELB;NFKB2;REL	known10.motif	chr7	28149438	28150195	JAZF1-AS1	-1.14316	2.26504e-10	intron (NM_175061, intron 1 of 4)	-30640	gene_body	-0.948559	9.88587e-05	0.948559	concordant_down	3	-1.24321	1.12356e-09	yes	gene_down	TF_down	coherent_activation_loss	active_enhancer	0	1	1	1	1	0	0	0	2	2	2	9	yes	2	EH38D3958996	EH38E2543427	dELS	dELS	EH38E2543427;EH38E3764225
peak_0003936	ATF3	Closing	Atf3	ATF3	known9.motif	chr1	110235855	110236652	KCNC4	-1.16856	0.000209601	3' UTR (NM_004978, exon 4 of 4)	25940	gene_body	-0.554351	0.21565	0.554351	concordant_down	3	-3.92028	0.000169874	yes	gene_not_significant	TF_down	coherent_activation_loss	active_enhancer	0	1	0	1	1	0	0	0	2	2	2	9	yes	2	EH38D4410261	EH38E2830323	dELS	dELS	EH38E2830323;EH38E2830324
peak_0003936	FOSL1	Closing	Fra1	FOSL1	known4.motif	chr1	110235855	110236652	KCNC4	-1.16856	0.000209601	3' UTR (NM_004978, exon 4 of 4)	25940	gene_body	-0.554351	0.21565	0.554351	concordant_down	3	-2.84522	0.0038438	yes	gene_not_significant	TF_down	coherent_activation_loss	active_enhancer	0	1	0	1	1	0	0	0	2	2	2	9	yes	2	EH38D4410261	EH38E2830323	dELS	dELS	EH38E2830323;EH38E2830324
peak_0003936	FOSL2	Closing	Fra2	FOSL2	known11.motif	chr1	110235855	110236652	KCNC4	-1.16856	0.000209601	3' UTR (NM_004978, exon 4 of 4)	25940	gene_body	-0.554351	0.21565	0.554351	concordant_down	3	-2.94385	0.00157751	yes	gene_not_significant	TF_down	coherent_activation_loss	active_enhancer	0	1	0	1	1	0	0	0	2	2	2	9	yes	2	EH38D4410261	EH38E2830323	dELS	dELS	EH38E2830323;EH38E2830324
peak_0003936	FOSL2	Closing	Fosl2	FOSL2	known8.motif	chr1	110235855	110236652	KCNC4	-1.16856	0.000209601	3' UTR (NM_004978, exon 4 of 4)	25940	gene_body	-0.554351	0.21565	0.554351	concordant_down	3	-2.94385	0.00157751	yes	gene_not_significant	TF_down	coherent_activation_loss	active_enhancer	0	1	0	1	1	0	0	0	2	2	2	9	yes	2	EH38D4410261	EH38E2830323	dELS	dELS	EH38E2830323;EH38E2830324
peak_0003936	NFATC1	Closing	NFAT:AP1	NFATC1;NFATC2;NFATC3;NFATC4;JUN;FOS;BATF	known1.motif	chr1	110235855	110236652	KCNC4	-1.16856	0.000209601	3' UTR (NM_004978, exon 4 of 4)	25940	gene_body	-0.554351	0.21565	0.554351	concordant_down	3	-0.764829	0.0475296	yes	gene_not_significant	TF_down	coherent_activation_loss	active_enhancer	0	1	0	1	1	0	0	0	2	2	2	9	yes	2	EH38D4410261	EH38E2830323	dELS	dELS	EH38E2830323;EH38E2830324
peak_0003937	NFATC1	Closing	NFAT	NFATC1;NFATC2;NFATC3;NFATC4	known2.motif	chr1	110237799	110238196	KCNC4	-1.03489	2.41393e-05	3' UTR (NM_004978, exon 4 of 4)	27684	gene_body	-0.554351	0.21565	0.554351	concordant_down	3	-0.764829	0.0475296	yes	gene_not_significant	TF_down	coherent_activation_loss	active_enhancer	0	1	0	1	1	0	0	0	2	2	2	9	yes	1	EH38D2209791	EH38E1375589	dELS	dELS	EH38E1375589
peak_0005875	NFATC1	Closing	NFAT	NFATC1;NFATC2;NFATC3;NFATC4	known2.motif	chr1	180934568	180935016	KIAA1614-AS1	-1.00875	0.00109111	intron (NM_020950, intron 4 of 8)	20095	gene_body	-0.305318	1	0.305318	concordant_down	3	-0.764829	0.0475296	yes	gene_not_significant	TF_down	coherent_activation_loss	active_enhancer	0	1	1	1	1	1	0	0	2	2	2	9	yes	1	EH38D4440447	EH38E2851311	dELS	dELS	EH38E2851311
peak_0005875	RFX5	Closing	Rfx5	RFX5	known108.motif	chr1	180934568	180935016	KIAA1614-AS1	-1.00875	0.00109111	intron (NM_020950, intron 4 of 8)	20095	gene_body	-0.305318	1	0.305318	concordant_down	3	-0.493972	0.000101039	yes	gene_not_significant	TF_down	coherent_activation_loss	active_enhancer	0	1	1	1	1	1	0	0	2	2	2	9	yes	1	EH38D4440447	EH38E2851311	dELS	dELS	EH38E2851311
peak_0065134	ATF3	Closing	Atf3	ATF3	known9.motif	chr6	17884187	17885266	KIF13A	-1.00573	0.000958946	intron (NM_001105567, intron 3 of 36)	102908	gene_body	-0.0250154	1	0.0250154	concordant_down	3	-3.92028	0.000169874	yes	gene_not_significant	TF_down	coherent_activation_loss	active_enhancer	0	1	1	1	1	1	0	0	2	2	2	9	yes	4	EH38D3819803	EH38E2451084	dELS	dELS	EH38E2451084;EH38E2451086;EH38E3694443;EH38E3694444
peak_0065134	FOSL1	Closing	Fra1	FOSL1	known4.motif	chr6	17884187	17885266	KIF13A	-1.00573	0.000958946	intron (NM_001105567, intron 3 of 36)	102908	gene_body	-0.0250154	1	0.0250154	concordant_down	3	-2.84522	0.0038438	yes	gene_not_significant	TF_down	coherent_activation_loss	active_enhancer	0	1	1	1	1	1	0	0	2	2	2	9	yes	4	EH38D3819803	EH38E2451084	dELS	dELS	EH38E2451084;EH38E2451086;EH38E3694443;EH38E3694444
peak_0065134	FOSL2	Closing	Fra2	FOSL2	known11.motif	chr6	17884187	17885266	KIF13A	-1.00573	0.000958946	intron (NM_001105567, intron 3 of 36)	102908	gene_body	-0.0250154	1	0.0250154	concordant_down	3	-2.94385	0.00157751	yes	gene_not_significant	TF_down	coherent_activation_loss	active_enhancer	0	1	1	1	1	1	0	0	2	2	2	9	yes	4	EH38D3819803	EH38E2451084	dELS	dELS	EH38E2451084;EH38E2451086;EH38E3694443;EH38E3694444
peak_0065134	FOSL2	Closing	Fosl2	FOSL2	known8.motif	chr6	17884187	17885266	KIF13A	-1.00573	0.000958946	intron (NM_001105567, intron 3 of 36)	102908	gene_body	-0.0250154	1	0.0250154	concordant_down	3	-2.94385	0.00157751	yes	gene_not_significant	TF_down	coherent_activation_loss	active_enhancer	0	1	1	1	1	1	0	0	2	2	2	9	yes	4	EH38D3819803	EH38E2451084	dELS	dELS	EH38E2451084;EH38E2451086;EH38E3694443;EH38E3694444
peak_0065134	IRF4	Closing	IRF4	IRF4	known28.motif	chr6	17884187	17885266	KIF13A	-1.00573	0.000958946	intron (NM_001105567, intron 3 of 36)	102908	gene_body	-0.0250154	1	0.0250154	concordant_down	3	-1.96215	1.03297e-08	yes	gene_not_significant	TF_down	coherent_activation_loss	active_enhancer	0	1	1	1	1	1	0	0	2	2	2	9	yes	4	EH38D3819803	EH38E2451084	dELS	dELS	EH38E2451084;EH38E2451086;EH38E3694443;EH38E3694444
peak_0065134	NFKB1	Closing	NFkB-p65	NFKB1;RELA;RELB;NFKB2;REL	known10.motif	chr6	17884187	17885266	KIF13A	-1.00573	0.000958946	intron (NM_001105567, intron 3 of 36)	102908	gene_body	-0.0250154	1	0.0250154	concordant_down	3	-1.24321	1.12356e-09	yes	gene_not_significant	TF_down	coherent_activation_loss	active_enhancer	0	1	1	1	1	1	0	0	2	2	2	9	yes	4	EH38D3819803	EH38E2451084	dELS	dELS	EH38E2451084;EH38E2451086;EH38E3694443;EH38E3694444
peak_0039191	ATF3	Closing	Atf3	ATF3	known9.motif	chr19	50890653	50891482	KLKP1	-1.32215	3.18525e-11	intron (NR_002948, intron 3 of 4)	5330	gene_body	-2.1455	0.698683	2.1455	concordant_down	3	-3.92028	0.000169874	yes	gene_not_significant	TF_down	coherent_activation_loss	active_enhancer	0	1	0	1	1	0	0	0	2	2	2	9	yes	3	EH38D3071840	EH38E1962087	dELS	dELS	EH38E1962087;EH38E3314705;EH38E4202011
peak_0039191	EGR2	Closing	Egr2	EGR2	known16.motif	chr19	50890653	50891482	KLKP1	-1.32215	3.18525e-11	intron (NR_002948, intron 3 of 4)	5330	gene_body	-2.1455	0.698683	2.1455	concordant_down	3	-5.0555	5.55296e-22	yes	gene_not_significant	TF_down	coherent_activation_loss	active_enhancer	0	1	0	1	1	0	0	0	2	2	2	9	yes	3	EH38D3071840	EH38E1962087	dELS	dELS	EH38E1962087;EH38E3314705;EH38E4202011
peak_0039191	FOSL1	Closing	Fra1	FOSL1	known4.motif	chr19	50890653	50891482	KLKP1	-1.32215	3.18525e-11	intron (NR_002948, intron 3 of 4)	5330	gene_body	-2.1455	0.698683	2.1455	concordant_down	3	-2.84522	0.0038438	yes	gene_not_significant	TF_down	coherent_activation_loss	active_enhancer	0	1	0	1	1	0	0	0	2	2	2	9	yes	3	EH38D3071840	EH38E1962087	dELS	dELS	EH38E1962087;EH38E3314705;EH38E4202011
peak_0039191	FOSL2	Closing	Fra2	FOSL2	known11.motif	chr19	50890653	50891482	KLKP1	-1.32215	3.18525e-11	intron (NR_002948, intron 3 of 4)	5330	gene_body	-2.1455	0.698683	2.1455	concordant_down	3	-2.94385	0.00157751	yes	gene_not_significant	TF_down	coherent_activation_loss	active_enhancer	0	1	0	1	1	0	0	0	2	2	2	9	yes	3	EH38D3071840	EH38E1962087	dELS	dELS	EH38E1962087;EH38E3314705;EH38E4202011
peak_0039191	NFATC1	Closing	NFAT	NFATC1;NFATC2;NFATC3;NFATC4	known2.motif	chr19	50890653	50891482	KLKP1	-1.32215	3.18525e-11	intron (NR_002948, intron 3 of 4)	5330	gene_body	-2.1455	0.698683	2.1455	concordant_down	3	-0.764829	0.0475296	yes	gene_not_significant	TF_down	coherent_activation_loss	active_enhancer	0	1	0	1	1	0	0	0	2	2	2	9	yes	3	EH38D3071840	EH38E1962087	dELS	dELS	EH38E1962087;EH38E3314705;EH38E4202011
peak_0039191	NFKB1	Closing	NFkB-p65	NFKB1;RELA;RELB;NFKB2;REL	known10.motif	chr19	50890653	50891482	KLKP1	-1.32215	3.18525e-11	intron (NR_002948, intron 3 of 4)	5330	gene_body	-2.1455	0.698683	2.1455	concordant_down	3	-1.24321	1.12356e-09	yes	gene_not_significant	TF_down	coherent_activation_loss	active_enhancer	0	1	0	1	1	0	0	0	2	2	2	9	yes	3	EH38D3071840	EH38E1962087	dELS	dELS	EH38E1962087;EH38E3314705;EH38E4202011
peak_0022213	IRF4	Closing	IRF4	IRF4	known28.motif	chr13	113300028	113300308	LAMP1	-1.18315	0.000142695	intron (NM_005561, intron 1 of 8)	2929	gene_body	-0.20615	0.644797	0.20615	concordant_down	3	-1.96215	1.03297e-08	yes	gene_not_significant	TF_down	coherent_activation_loss	active_enhancer	0	1	1	1	1	0	0	0	2	2	2	9	yes	1	EH38D4797433	EH38E3083794	dELS	dELS	EH38E3083794
peak_0025792	ATF3	Closing	Atf3	ATF3	known9.motif	chr15	59249399	59250162	LDHAL6B	-1.16805	6.51249e-06	intron (NM_004998, intron 4 of 27)	42938	gene_body	-1.09778	0.402668	1.09778	concordant_down	3	-3.92028	0.000169874	yes	gene_not_significant	TF_down	coherent_activation_loss	active_enhancer	0	1	1	1	1	1	1	0	2	2	2	9	yes	2	EH38D2794448	EH38E1766129	dELS	dELS	EH38E1766129;EH38E3136999
peak_0025792	FOSL1	Closing	Fra1	FOSL1	known4.motif	chr15	59249399	59250162	LDHAL6B	-1.16805	6.51249e-06	intron (NM_004998, intron 4 of 27)	42938	gene_body	-1.09778	0.402668	1.09778	concordant_down	3	-2.84522	0.0038438	yes	gene_not_significant	TF_down	coherent_activation_loss	active_enhancer	0	1	1	1	1	1	1	0	2	2	2	9	yes	2	EH38D2794448	EH38E1766129	dELS	dELS	EH38E1766129;EH38E3136999
peak_0025792	NFATC1	Closing	NFAT:AP1	NFATC1;NFATC2;NFATC3;NFATC4;JUN;FOS;BATF	known1.motif	chr15	59249399	59250162	LDHAL6B	-1.16805	6.51249e-06	intron (NM_004998, intron 4 of 27)	42938	gene_body	-1.09778	0.402668	1.09778	concordant_down	3	-0.764829	0.0475296	yes	gene_not_significant	TF_down	coherent_activation_loss	active_enhancer	0	1	1	1	1	1	1	0	2	2	2	9	yes	2	EH38D2794448	EH38E1766129	dELS	dELS	EH38E1766129;EH38E3136999
peak_0025792	NFATC1	Closing	NFAT	NFATC1;NFATC2;NFATC3;NFATC4	known2.motif	chr15	59249399	59250162	LDHAL6B	-1.16805	6.51249e-06	intron (NM_004998, intron 4 of 27)	42938	gene_body	-1.09778	0.402668	1.09778	concordant_down	3	-0.764829	0.0475296	yes	gene_not_significant	TF_down	coherent_activation_loss	active_enhancer	0	1	1	1	1	1	1	0	2	2	2	9	yes	2	EH38D2794448	EH38E1766129	dELS	dELS	EH38E1766129;EH38E3136999
peak_0024422	ATF3	Closing	Atf3	ATF3	known9.motif	chr14	92668546	92668930	LGMN	-1.42893	9.23421e-09	intron (NM_024832, intron 7 of 9)	79889	gene_body	-0.068674	1	0.068674	concordant_down	3	-3.92028	0.000169874	yes	gene_not_significant	TF_down	coherent_activation_loss	active_enhancer	0	1	0	1	1	0	0	1	2	2	2	9	yes	1	EH38D6236626	EH38E4113579	dELS	dELS	EH38E4113579
peak_0024422	FOSL2	Closing	Fra2	FOSL2	known11.motif	chr14	92668546	92668930	LGMN	-1.42893	9.23421e-09	intron (NM_024832, intron 7 of 9)	79889	gene_body	-0.068674	1	0.068674	concordant_down	3	-2.94385	0.00157751	yes	gene_not_significant	TF_down	coherent_activation_loss	active_enhancer	0	1	0	1	1	0	0	1	2	2	2	9	yes	1	EH38D6236626	EH38E4113579	dELS	dELS	EH38E4113579
peak_0024422	NFATC1	Closing	NFAT:AP1	NFATC1;NFATC2;NFATC3;NFATC4;JUN;FOS;BATF	known1.motif	chr14	92668546	92668930	LGMN	-1.42893	9.23421e-09	intron (NM_024832, intron 7 of 9)	79889	gene_body	-0.068674	1	0.068674	concordant_down	3	-0.764829	0.0475296	yes	gene_not_significant	TF_down	coherent_activation_loss	active_enhancer	0	1	0	1	1	0	0	1	2	2	2	9	yes	1	EH38D6236626	EH38E4113579	dELS	dELS	EH38E4113579
peak_0024422	NFATC1	Closing	NFAT	NFATC1;NFATC2;NFATC3;NFATC4	known2.motif	chr14	92668546	92668930	LGMN	-1.42893	9.23421e-09	intron (NM_024832, intron 7 of 9)	79889	gene_body	-0.068674	1	0.068674	concordant_down	3	-0.764829	0.0475296	yes	gene_not_significant	TF_down	coherent_activation_loss	active_enhancer	0	1	0	1	1	0	0	1	2	2	2	9	yes	1	EH38D6236626	EH38E4113579	dELS	dELS	EH38E4113579
peak_0048566	NFKB1	Closing	NFkB-p65	NFKB1;RELA;RELB;NFKB2;REL	known10.motif	chr21	25188614	25189086	LINC00158	-1.08183	0.0209694	Intergenic	242851	distal	-3.11844	1.4499e-05	3.11844	concordant_down	3	-1.24321	1.12356e-09	yes	gene_down	TF_down	coherent_activation_loss	active_enhancer	0	0	0	1	1	0	0	0	2	2	2	9	yes	1	EH38D3329671	EH38E2133646	dELS	dELS	EH38E2133646
peak_0048576	ATF3	Closing	Atf3	ATF3	known9.motif	chr21	25298246	25299231	LINC00158	-1.17916	1.33059e-05	Intergenic	132962	distal	-3.11844	1.4499e-05	3.11844	concordant_down	3	-3.92028	0.000169874	yes	gene_down	TF_down	coherent_activation_loss	active_enhancer	0	0	1	1	1	0	1	0	2	2	2	9	yes	3	EH38D3329729	EH38E2133667	dELS	dELS	EH38E2133667;EH38E2133669;EH38E3452684
peak_0048576	FOSL1	Closing	Fra1	FOSL1	known4.motif	chr21	25298246	25299231	LINC00158	-1.17916	1.33059e-05	Intergenic	132962	distal	-3.11844	1.4499e-05	3.11844	concordant_down	3	-2.84522	0.0038438	yes	gene_down	TF_down	coherent_activation_loss	active_enhancer	0	0	1	1	1	0	1	0	2	2	2	9	yes	3	EH38D3329729	EH38E2133667	dELS	dELS	EH38E2133667;EH38E2133669;EH38E3452684
peak_0048576	FOSL2	Closing	Fra2	FOSL2	known11.motif	chr21	25298246	25299231	LINC00158	-1.17916	1.33059e-05	Intergenic	132962	distal	-3.11844	1.4499e-05	3.11844	concordant_down	3	-2.94385	0.00157751	yes	gene_down	TF_down	coherent_activation_loss	active_enhancer	0	0	1	1	1	0	1	0	2	2	2	9	yes	3	EH38D3329729	EH38E2133667	dELS	dELS	EH38E2133667;EH38E2133669;EH38E3452684
peak_0048576	FOSL2	Closing	Fosl2	FOSL2	known8.motif	chr21	25298246	25299231	LINC00158	-1.17916	1.33059e-05	Intergenic	132962	distal	-3.11844	1.4499e-05	3.11844	concordant_down	3	-2.94385	0.00157751	yes	gene_down	TF_down	coherent_activation_loss	active_enhancer	0	0	1	1	1	0	1	0	2	2	2	9	yes	3	EH38D3329729	EH38E2133667	dELS	dELS	EH38E2133667;EH38E2133669;EH38E3452684
peak_0048576	NFE2L2	Closing	NFE2L2	NFE2L2	known62.motif	chr21	25298246	25299231	LINC00158	-1.17916	1.33059e-05	Intergenic	132962	distal	-3.11844	1.4499e-05	3.11844	concordant_down	3	-0.799869	0.00280392	yes	gene_down	TF_down	coherent_activation_loss	active_enhancer	0	0	1	1	1	0	1	0	2	2	2	9	yes	3	EH38D3329729	EH38E2133667	dELS	dELS	EH38E2133667;EH38E2133669;EH38E3452684
peak_0048593	NFATC1	Closing	NFAT	NFATC1;NFATC2;NFATC3;NFATC4	known2.motif	chr21	25459441	25459745	LINC00158	-1.73696	7.51183e-08	Intergenic	-27892	distal	-3.11844	1.4499e-05	3.11844	concordant_down	3	-0.764829	0.0475296	yes	gene_down	TF_down	coherent_activation_loss	active_enhancer	0	0	0	1	1	0	1	0	2	2	2	9	yes	1	EH38D5360420	EH38E3452736	dELS	dELS	EH38E3452736
peak_0048594	NFATC1	Closing	NFAT:AP1	NFATC1;NFATC2;NFATC3;NFATC4;JUN;FOS;BATF	known1.motif	chr21	25462496	25463358	LINC00158	-1.25916	2.14541e-06	Intergenic	-31226	distal	-3.11844	1.4499e-05	3.11844	concordant_down	3	-0.764829	0.0475296	yes	gene_down	TF_down	coherent_activation_loss	active_enhancer	0	0	1	1	1	0	1	0	2	2	2	9	yes	2	EH38D3329854	EH38E2133743	dELS	dELS	EH38E2133743;EH38E3452738
peak_0048594	NFATC1	Closing	NFAT	NFATC1;NFATC2;NFATC3;NFATC4	known2.motif	chr21	25462496	25463358	LINC00158	-1.25916	2.14541e-06	Intergenic	-31226	distal	-3.11844	1.4499e-05	3.11844	concordant_down	3	-0.764829	0.0475296	yes	gene_down	TF_down	coherent_activation_loss	active_enhancer	0	0	1	1	1	0	1	0	2	2	2	9	yes	2	EH38D3329854	EH38E2133743	dELS	dELS	EH38E2133743;EH38E3452738
peak_0048595	ATF3	Closing	Atf3	ATF3	known9.motif	chr21	25464293	25464534	LINC00158	-1.26134	0.000103235	Intergenic	-32713	distal	-3.11844	1.4499e-05	3.11844	concordant_down	3	-3.92028	0.000169874	yes	gene_down	TF_down	coherent_activation_loss	active_enhancer	0	0	0	1	1	0	0	0	2	2	2	9	yes	1	EH38D3329855	EH38E2133744	dELS	dELS	EH38E2133744
peak_0048595	FOSL1	Closing	Fra1	FOSL1	known4.motif	chr21	25464293	25464534	LINC00158	-1.26134	0.000103235	Intergenic	-32713	distal	-3.11844	1.4499e-05	3.11844	concordant_down	3	-2.84522	0.0038438	yes	gene_down	TF_down	coherent_activation_loss	active_enhancer	0	0	0	1	1	0	0	0	2	2	2	9	yes	1	EH38D3329855	EH38E2133744	dELS	dELS	EH38E2133744
peak_0048595	FOSL2	Closing	Fra2	FOSL2	known11.motif	chr21	25464293	25464534	LINC00158	-1.26134	0.000103235	Intergenic	-32713	distal	-3.11844	1.4499e-05	3.11844	concordant_down	3	-2.94385	0.00157751	yes	gene_down	TF_down	coherent_activation_loss	active_enhancer	0	0	0	1	1	0	0	0	2	2	2	9	yes	1	EH38D3329855	EH38E2133744	dELS	dELS	EH38E2133744
peak_0048595	FOSL2	Closing	Fosl2	FOSL2	known8.motif	chr21	25464293	25464534	LINC00158	-1.26134	0.000103235	Intergenic	-32713	distal	-3.11844	1.4499e-05	3.11844	concordant_down	3	-2.94385	0.00157751	yes	gene_down	TF_down	coherent_activation_loss	active_enhancer	0	0	0	1	1	0	0	0	2	2	2	9	yes	1	EH38D3329855	EH38E2133744	dELS	dELS	EH38E2133744
peak_0048595	RFX5	Closing	Rfx5	RFX5	known108.motif	chr21	25464293	25464534	LINC00158	-1.26134	0.000103235	Intergenic	-32713	distal	-3.11844	1.4499e-05	3.11844	concordant_down	3	-0.493972	0.000101039	yes	gene_down	TF_down	coherent_activation_loss	active_enhancer	0	0	0	1	1	0	0	0	2	2	2	9	yes	1	EH38D3329855	EH38E2133744	dELS	dELS	EH38E2133744
peak_0073304	ATF3	Closing	Atf3	ATF3	known9.motif	chr7	156499041	156499906	LINC00244	-1.18358	1.4029e-05	intron (NR_026865, intron 2 of 3)	-41017	gene_body	-0.476315	1	0.476315	concordant_down	3	-3.92028	0.000169874	yes	gene_not_significant	TF_down	coherent_activation_loss	active_enhancer	0	1	1	1	1	1	1	0	2	2	2	9	yes	1	EH38D6432212	EH38E4457250	CA	CA	EH38E4457250
peak_0073304	FOSL1	Closing	Fra1	FOSL1	known4.motif	chr7	156499041	156499906	LINC00244	-1.18358	1.4029e-05	intron (NR_026865, intron 2 of 3)	-41017	gene_body	-0.476315	1	0.476315	concordant_down	3	-2.84522	0.0038438	yes	gene_not_significant	TF_down	coherent_activation_loss	active_enhancer	0	1	1	1	1	1	1	0	2	2	2	9	yes	1	EH38D6432212	EH38E4457250	CA	CA	EH38E4457250
peak_0073304	FOSL2	Closing	Fra2	FOSL2	known11.motif	chr7	156499041	156499906	LINC00244	-1.18358	1.4029e-05	intron (NR_026865, intron 2 of 3)	-41017	gene_body	-0.476315	1	0.476315	concordant_down	3	-2.94385	0.00157751	yes	gene_not_significant	TF_down	coherent_activation_loss	active_enhancer	0	1	1	1	1	1	1	0	2	2	2	9	yes	1	EH38D6432212	EH38E4457250	CA	CA	EH38E4457250
peak_0073304	FOSL2	Closing	Fosl2	FOSL2	known8.motif	chr7	156499041	156499906	LINC00244	-1.18358	1.4029e-05	intron (NR_026865, intron 2 of 3)	-41017	gene_body	-0.476315	1	0.476315	concordant_down	3	-2.94385	0.00157751	yes	gene_not_significant	TF_down	coherent_activation_loss	active_enhancer	0	1	1	1	1	1	1	0	2	2	2	9	yes	1	EH38D6432212	EH38E4457250	CA	CA	EH38E4457250
peak_0073304	NFATC1	Closing	NFAT:AP1	NFATC1;NFATC2;NFATC3;NFATC4;JUN;FOS;BATF	known1.motif	chr7	156499041	156499906	LINC00244	-1.18358	1.4029e-05	intron (NR_026865, intron 2 of 3)	-41017	gene_body	-0.476315	1	0.476315	concordant_down	3	-0.764829	0.0475296	yes	gene_not_significant	TF_down	coherent_activation_loss	active_enhancer	0	1	1	1	1	1	1	0	2	2	2	9	yes	1	EH38D6432212	EH38E4457250	CA	CA	EH38E4457250
peak_0073304	NFATC1	Closing	NFAT	NFATC1;NFATC2;NFATC3;NFATC4	known2.motif	chr7	156499041	156499906	LINC00244	-1.18358	1.4029e-05	intron (NR_026865, intron 2 of 3)	-41017	gene_body	-0.476315	1	0.476315	concordant_down	3	-0.764829	0.0475296	yes	gene_not_significant	TF_down	coherent_activation_loss	active_enhancer	0	1	1	1	1	1	1	0	2	2	2	9	yes	1	EH38D6432212	EH38E4457250	CA	CA	EH38E4457250
peak_0067791	EGR2	Closing	Egr2	EGR2	known16.motif	chr6	135577113	135577539	LINC00271	-1.03751	0.00405197	intron (NR_152845, intron 2 of 4)	79525	gene_body	-0.0186345	1	0.0186345	concordant_down	3	-5.0555	5.55296e-22	yes	gene_not_significant	TF_down	coherent_activation_loss	active_enhancer	0	1	0	1	1	0	0	0	2	2	2	9	yes	1	EH38D5795601	EH38E3734556	dELS	dELS	EH38E3734556
peak_0067791	IRF4	Closing	IRF4	IRF4	known28.motif	chr6	135577113	135577539	LINC00271	-1.03751	0.00405197	intron (NR_152845, intron 2 of 4)	79525	gene_body	-0.0186345	1	0.0186345	concordant_down	3	-1.96215	1.03297e-08	yes	gene_not_significant	TF_down	coherent_activation_loss	active_enhancer	0	1	0	1	1	0	0	0	2	2	2	9	yes	1	EH38D5795601	EH38E3734556	dELS	dELS	EH38E3734556
peak_0067791	NFATC1	Closing	NFAT:AP1	NFATC1;NFATC2;NFATC3;NFATC4;JUN;FOS;BATF	known1.motif	chr6	135577113	135577539	LINC00271	-1.03751	0.00405197	intron (NR_152845, intron 2 of 4)	79525	gene_body	-0.0186345	1	0.0186345	concordant_down	3	-0.764829	0.0475296	yes	gene_not_significant	TF_down	coherent_activation_loss	active_enhancer	0	1	0	1	1	0	0	0	2	2	2	9	yes	1	EH38D5795601	EH38E3734556	dELS	dELS	EH38E3734556
peak_0067791	NFATC1	Closing	NFAT	NFATC1;NFATC2;NFATC3;NFATC4	known2.motif	chr6	135577113	135577539	LINC00271	-1.03751	0.00405197	intron (NR_152845, intron 2 of 4)	79525	gene_body	-0.0186345	1	0.0186345	concordant_down	3	-0.764829	0.0475296	yes	gene_not_significant	TF_down	coherent_activation_loss	active_enhancer	0	1	0	1	1	0	0	0	2	2	2	9	yes	1	EH38D5795601	EH38E3734556	dELS	dELS	EH38E3734556
peak_0028392	ATF3	Closing	Atf3	ATF3	known9.motif	chr16	24668466	24668864	LINC01567	-1.02612	0.0209694	intron (NR_122072, intron 1 of 2)	2397	gene_body	-0.376389	1	0.376389	concordant_down	3	-3.92028	0.000169874	yes	gene_not_significant	TF_down	coherent_activation_loss	active_enhancer	0	1	0	1	1	1	0	0	2	2	2	9	yes	1	EH38D4934747	EH38E3173875	dELS	dELS	EH38E3173875
peak_0028392	FOSL1	Closing	Fra1	FOSL1	known4.motif	chr16	24668466	24668864	LINC01567	-1.02612	0.0209694	intron (NR_122072, intron 1 of 2)	2397	gene_body	-0.376389	1	0.376389	concordant_down	3	-2.84522	0.0038438	yes	gene_not_significant	TF_down	coherent_activation_loss	active_enhancer	0	1	0	1	1	1	0	0	2	2	2	9	yes	1	EH38D4934747	EH38E3173875	dELS	dELS	EH38E3173875
peak_0028392	IRF4	Closing	IRF4	IRF4	known28.motif	chr16	24668466	24668864	LINC01567	-1.02612	0.0209694	intron (NR_122072, intron 1 of 2)	2397	gene_body	-0.376389	1	0.376389	concordant_down	3	-1.96215	1.03297e-08	yes	gene_not_significant	TF_down	coherent_activation_loss	active_enhancer	0	1	0	1	1	1	0	0	2	2	2	9	yes	1	EH38D4934747	EH38E3173875	dELS	dELS	EH38E3173875
peak_0010280	IRF4	Closing	IRF4	IRF4	known28.motif	chr10	88598061	88598582	LIPJ	-1.31244	0.000392038	intron (NM_001010939, intron 8 of 10)	11560	gene_body	-0.0791005	1	0.0791005	concordant_down	3	-1.96215	1.03297e-08	yes	gene_not_significant	TF_down	coherent_activation_loss	active_enhancer	0	1	0	1	1	0	0	0	2	2	2	9	yes	1	EH38D4536780	EH38E2915072	dELS	dELS	EH38E2915072
peak_0010280	NFATC1	Closing	NFAT	NFATC1;NFATC2;NFATC3;NFATC4	known2.motif	chr10	88598061	88598582	LIPJ	-1.31244	0.000392038	intron (NM_001010939, intron 8 of 10)	11560	gene_body	-0.0791005	1	0.0791005	concordant_down	3	-0.764829	0.0475296	yes	gene_not_significant	TF_down	coherent_activation_loss	active_enhancer	0	1	0	1	1	0	0	0	2	2	2	9	yes	1	EH38D4536780	EH38E2915072	dELS	dELS	EH38E2915072
peak_0003285	NFATC1	Closing	NFAT:AP1	NFATC1;NFATC2;NFATC3;NFATC4;JUN;FOS;BATF	known1.motif	chr1	87333796	87334184	LMO4	-1.17202	1.01218e-05	intron (NM_006769, intron 2 of 4)	2246	gene_body	-0.0491789	1	0.0491789	concordant_down	3	-0.764829	0.0475296	yes	gene_not_significant	TF_down	coherent_activation_loss	active_enhancer	0	1	1	1	1	0	0	0	2	2	2	9	yes	2	EH38D4399142	EH38E2822928	dELS	dELS	EH38E2822928;EH38E2822929
peak_0003285	NFATC1	Closing	NFAT	NFATC1;NFATC2;NFATC3;NFATC4	known2.motif	chr1	87333796	87334184	LMO4	-1.17202	1.01218e-05	intron (NM_006769, intron 2 of 4)	2246	gene_body	-0.0491789	1	0.0491789	concordant_down	3	-0.764829	0.0475296	yes	gene_not_significant	TF_down	coherent_activation_loss	active_enhancer	0	1	1	1	1	0	0	0	2	2	2	9	yes	2	EH38D4399142	EH38E2822928	dELS	dELS	EH38E2822928;EH38E2822929
peak_0021177	EGR2	Closing	Egr2	EGR2	known16.motif	chr13	46575275	46575616	LRCH1	-1.64528	0.000446138	intron (NM_001164213, intron 1 of 18)	22276	gene_body	-0.172502	1	0.172502	concordant_down	3	-5.0555	5.55296e-22	yes	gene_not_significant	TF_down	coherent_activation_loss	active_enhancer	0	1	0	1	1	0	0	0	2	2	2	9	yes	2	EH38D4765322	EH38E3064991	dELS	dELS	EH38E3064991;EH38E3064992
peak_0003351	RFX5	Closing	Rfx5	RFX5	known108.motif	chr1	89539265	89539437	LRRC8B	-1.25016	0.0184251	intron (NM_001369819, intron 2 of 6)	14513	gene_body	-0.849114	0.0012742	0.849114	concordant_down	3	-0.493972	0.000101039	yes	gene_down	TF_down	coherent_activation_loss	active_enhancer	0	1	0	1	1	0	0	1	2	2	2	9	yes	1	EH38D2194806	EH38E1365919	dELS	dELS	EH38E1365919
peak_0003353	ATF3	Closing	Atf3	ATF3	known9.motif	chr1	89545473	89546404	LRRC8B	-1.3364	5.53093e-06	intron (NM_001369819, intron 2 of 6)	21101	gene_body	-0.849114	0.0012742	0.849114	concordant_down	3	-3.92028	0.000169874	yes	gene_down	TF_down	coherent_activation_loss	active_enhancer	0	1	0	1	1	0	0	0	2	2	2	9	yes	3	EH38D2194812	EH38E1365924	dELS	dELS	EH38E1365924;EH38E2823650;EH38E2823651
peak_0003353	FOSL1	Closing	Fra1	FOSL1	known4.motif	chr1	89545473	89546404	LRRC8B	-1.3364	5.53093e-06	intron (NM_001369819, intron 2 of 6)	21101	gene_body	-0.849114	0.0012742	0.849114	concordant_down	3	-2.84522	0.0038438	yes	gene_down	TF_down	coherent_activation_loss	active_enhancer	0	1	0	1	1	0	0	0	2	2	2	9	yes	3	EH38D2194812	EH38E1365924	dELS	dELS	EH38E1365924;EH38E2823650;EH38E2823651
peak_0003353	FOSL2	Closing	Fra2	FOSL2	known11.motif	chr1	89545473	89546404	LRRC8B	-1.3364	5.53093e-06	intron (NM_001369819, intron 2 of 6)	21101	gene_body	-0.849114	0.0012742	0.849114	concordant_down	3	-2.94385	0.00157751	yes	gene_down	TF_down	coherent_activation_loss	active_enhancer	0	1	0	1	1	0	0	0	2	2	2	9	yes	3	EH38D2194812	EH38E1365924	dELS	dELS	EH38E1365924;EH38E2823650;EH38E2823651
peak_0003353	FOSL2	Closing	Fosl2	FOSL2	known8.motif	chr1	89545473	89546404	LRRC8B	-1.3364	5.53093e-06	intron (NM_001369819, intron 2 of 6)	21101	gene_body	-0.849114	0.0012742	0.849114	concordant_down	3	-2.94385	0.00157751	yes	gene_down	TF_down	coherent_activation_loss	active_enhancer	0	1	0	1	1	0	0	0	2	2	2	9	yes	3	EH38D2194812	EH38E1365924	dELS	dELS	EH38E1365924;EH38E2823650;EH38E2823651
peak_0003353	NFATC1	Closing	NFAT	NFATC1;NFATC2;NFATC3;NFATC4	known2.motif	chr1	89545473	89546404	LRRC8B	-1.3364	5.53093e-06	intron (NM_001369819, intron 2 of 6)	21101	gene_body	-0.849114	0.0012742	0.849114	concordant_down	3	-0.764829	0.0475296	yes	gene_down	TF_down	coherent_activation_loss	active_enhancer	0	1	0	1	1	0	0	0	2	2	2	9	yes	3	EH38D2194812	EH38E1365924	dELS	dELS	EH38E1365924;EH38E2823650;EH38E2823651
peak_0043788	ATF3	Closing	Atf3	ATF3	known9.motif	chr2	159878791	159879642	LY75	-1.88188	4.60572e-06	intron (NM_002349, intron 9 of 34)	25539	gene_body	-0.904865	0.00878079	0.904865	concordant_down	3	-3.92028	0.000169874	yes	gene_down	TF_down	coherent_activation_loss	active_enhancer	0	1	0	1	1	0	0	1	2	2	2	9	yes	2	EH38D5249902	EH38E3380387	dELS	dELS	EH38E3380387;EH38E3380388
peak_0043788	FOSL1	Closing	Fra1	FOSL1	known4.motif	chr2	159878791	159879642	LY75	-1.88188	4.60572e-06	intron (NM_002349, intron 9 of 34)	25539	gene_body	-0.904865	0.00878079	0.904865	concordant_down	3	-2.84522	0.0038438	yes	gene_down	TF_down	coherent_activation_loss	active_enhancer	0	1	0	1	1	0	0	1	2	2	2	9	yes	2	EH38D5249902	EH38E3380387	dELS	dELS	EH38E3380387;EH38E3380388
peak_0043788	FOSL2	Closing	Fra2	FOSL2	known11.motif	chr2	159878791	159879642	LY75	-1.88188	4.60572e-06	intron (NM_002349, intron 9 of 34)	25539	gene_body	-0.904865	0.00878079	0.904865	concordant_down	3	-2.94385	0.00157751	yes	gene_down	TF_down	coherent_activation_loss	active_enhancer	0	1	0	1	1	0	0	1	2	2	2	9	yes	2	EH38D5249902	EH38E3380387	dELS	dELS	EH38E3380387;EH38E3380388
peak_0043788	FOSL2	Closing	Fosl2	FOSL2	known8.motif	chr2	159878791	159879642	LY75	-1.88188	4.60572e-06	intron (NM_002349, intron 9 of 34)	25539	gene_body	-0.904865	0.00878079	0.904865	concordant_down	3	-2.94385	0.00157751	yes	gene_down	TF_down	coherent_activation_loss	active_enhancer	0	1	0	1	1	0	0	1	2	2	2	9	yes	2	EH38D5249902	EH38E3380387	dELS	dELS	EH38E3380387;EH38E3380388
peak_0043788	NFATC1	Closing	NFAT	NFATC1;NFATC2;NFATC3;NFATC4	known2.motif	chr2	159878791	159879642	LY75	-1.88188	4.60572e-06	intron (NM_002349, intron 9 of 34)	25539	gene_body	-0.904865	0.00878079	0.904865	concordant_down	3	-0.764829	0.0475296	yes	gene_down	TF_down	coherent_activation_loss	active_enhancer	0	1	0	1	1	0	0	1	2	2	2	9	yes	2	EH38D5249902	EH38E3380387	dELS	dELS	EH38E3380387;EH38E3380388
peak_0043788	NFKB1	Closing	NFkB-p65	NFKB1;RELA;RELB;NFKB2;REL	known10.motif	chr2	159878791	159879642	LY75	-1.88188	4.60572e-06	intron (NM_002349, intron 9 of 34)	25539	gene_body	-0.904865	0.00878079	0.904865	concordant_down	3	-1.24321	1.12356e-09	yes	gene_down	TF_down	coherent_activation_loss	active_enhancer	0	1	0	1	1	0	0	1	2	2	2	9	yes	2	EH38D5249902	EH38E3380387	dELS	dELS	EH38E3380387;EH38E3380388
peak_0043790	NFE2L2	Closing	NFE2L2	NFE2L2	known62.motif	chr2	159895155	159895911	LY75	-1.17721	0.00240921	intron (NM_002349, intron 2 of 34)	9223	gene_body	-0.904865	0.00878079	0.904865	concordant_down	3	-0.799869	0.00280392	yes	gene_down	TF_down	coherent_activation_loss	active_enhancer	0	1	0	1	1	0	0	0	2	2	2	9	yes	3	EH38D3199465	EH38E2045138	dELS	dELS	EH38E2045138;EH38E2045139;EH38E2045140
peak_0043790	NFKB1	Closing	NFkB-p65	NFKB1;RELA;RELB;NFKB2;REL	known10.motif	chr2	159895155	159895911	LY75	-1.17721	0.00240921	intron (NM_002349, intron 2 of 34)	9223	gene_body	-0.904865	0.00878079	0.904865	concordant_down	3	-1.24321	1.12356e-09	yes	gene_down	TF_down	coherent_activation_loss	active_enhancer	0	1	0	1	1	0	0	0	2	2	2	9	yes	3	EH38D3199465	EH38E2045138	dELS	dELS	EH38E2045138;EH38E2045139;EH38E2045140
peak_0043790	NFKB1	Closing	NFkB-p50,p52	NFKB1;NFKB2	known13.motif	chr2	159895155	159895911	LY75	-1.17721	0.00240921	intron (NM_002349, intron 2 of 34)	9223	gene_body	-0.904865	0.00878079	0.904865	concordant_down	3	-1.24321	1.12356e-09	yes	gene_down	TF_down	coherent_activation_loss	active_enhancer	0	1	0	1	1	0	0	0	2	2	2	9	yes	3	EH38D3199465	EH38E2045138	dELS	dELS	EH38E2045138;EH38E2045139;EH38E2045140
peak_0043790	RFX5	Closing	Rfx5	RFX5	known108.motif	chr2	159895155	159895911	LY75	-1.17721	0.00240921	intron (NM_002349, intron 2 of 34)	9223	gene_body	-0.904865	0.00878079	0.904865	concordant_down	3	-0.493972	0.000101039	yes	gene_down	TF_down	coherent_activation_loss	active_enhancer	0	1	0	1	1	0	0	0	2	2	2	9	yes	3	EH38D3199465	EH38E2045138	dELS	dELS	EH38E2045138;EH38E2045139;EH38E2045140
peak_0002090	ATF3	Closing	Atf3	ATF3	known9.motif	chr1	39191738	39192776	MACF1	-1.07456	3.39603e-08	intron (NM_012090, intron 1 of 92)	108090	gene_body	-0.00666342	1	0.00666342	concordant_down	3	-3.92028	0.000169874	yes	gene_not_significant	TF_down	coherent_activation_loss	active_enhancer	0	1	1	1	1	0	0	0	2	2	2	9	yes	3	EH38D4371235	EH38E2804640	dELS	dELS	EH38E2804640;EH38E2804641;EH38E2804642
peak_0002090	FOSL1	Closing	Fra1	FOSL1	known4.motif	chr1	39191738	39192776	MACF1	-1.07456	3.39603e-08	intron (NM_012090, intron 1 of 92)	108090	gene_body	-0.00666342	1	0.00666342	concordant_down	3	-2.84522	0.0038438	yes	gene_not_significant	TF_down	coherent_activation_loss	active_enhancer	0	1	1	1	1	0	0	0	2	2	2	9	yes	3	EH38D4371235	EH38E2804640	dELS	dELS	EH38E2804640;EH38E2804641;EH38E2804642
peak_0002090	FOSL2	Closing	Fra2	FOSL2	known11.motif	chr1	39191738	39192776	MACF1	-1.07456	3.39603e-08	intron (NM_012090, intron 1 of 92)	108090	gene_body	-0.00666342	1	0.00666342	concordant_down	3	-2.94385	0.00157751	yes	gene_not_significant	TF_down	coherent_activation_loss	active_enhancer	0	1	1	1	1	0	0	0	2	2	2	9	yes	3	EH38D4371235	EH38E2804640	dELS	dELS	EH38E2804640;EH38E2804641;EH38E2804642
peak_0002090	FOSL2	Closing	Fosl2	FOSL2	known8.motif	chr1	39191738	39192776	MACF1	-1.07456	3.39603e-08	intron (NM_012090, intron 1 of 92)	108090	gene_body	-0.00666342	1	0.00666342	concordant_down	3	-2.94385	0.00157751	yes	gene_not_significant	TF_down	coherent_activation_loss	active_enhancer	0	1	1	1	1	0	0	0	2	2	2	9	yes	3	EH38D4371235	EH38E2804640	dELS	dELS	EH38E2804640;EH38E2804641;EH38E2804642
peak_0002090	NFATC1	Closing	NFAT:AP1	NFATC1;NFATC2;NFATC3;NFATC4;JUN;FOS;BATF	known1.motif	chr1	39191738	39192776	MACF1	-1.07456	3.39603e-08	intron (NM_012090, intron 1 of 92)	108090	gene_body	-0.00666342	1	0.00666342	concordant_down	3	-0.764829	0.0475296	yes	gene_not_significant	TF_down	coherent_activation_loss	active_enhancer	0	1	1	1	1	0	0	0	2	2	2	9	yes	3	EH38D4371235	EH38E2804640	dELS	dELS	EH38E2804640;EH38E2804641;EH38E2804642
peak_0002090	NFATC1	Closing	NFAT	NFATC1;NFATC2;NFATC3;NFATC4	known2.motif	chr1	39191738	39192776	MACF1	-1.07456	3.39603e-08	intron (NM_012090, intron 1 of 92)	108090	gene_body	-0.00666342	1	0.00666342	concordant_down	3	-0.764829	0.0475296	yes	gene_not_significant	TF_down	coherent_activation_loss	active_enhancer	0	1	1	1	1	0	0	0	2	2	2	9	yes	3	EH38D4371235	EH38E2804640	dELS	dELS	EH38E2804640;EH38E2804641;EH38E2804642
peak_0081029	NFATC1	Closing	NFAT	NFATC1;NFATC2;NFATC3;NFATC4	known2.motif	chrX	19571725	19572039	MAP3K15	-2.12334	0.0109832	intron (NM_001024666, intron 11 of 16)	-56621	gene_body	-0.326561	0.283118	0.326561	concordant_down	3	-0.764829	0.0475296	yes	gene_not_significant	TF_down	coherent_activation_loss	active_enhancer	0	1	0	1	1	0	0	0	2	2	2	9	yes	1	EH38D6095286	EH38E3927456	dELS	dELS	EH38E3927456
peak_0008831	NFATC1	Closing	NFAT	NFATC1;NFATC2;NFATC3;NFATC4	known2.motif	chr10	30422367	30422602	MAP3K8	-1.17893	0.000134591	Intergenic	-11536	distal	-1.01819	0.00429515	1.01819	concordant_down	3	-0.764829	0.0475296	yes	gene_down	TF_down	coherent_activation_loss	active_enhancer	0	0	1	1	1	0	0	0	2	2	2	9	yes	1	EH38D4503022	EH38E2893834	dELS	dELS	EH38E2893834
peak_0079720	ATF3	Closing	Atf3	ATF3	known9.motif	chr9	125700806	125701586	MAPKAP1	-1.24996	0.000653895	intron (NM_001006619, intron 1 of 10)	6012	gene_body	-0.454919	0.0245737	0.454919	concordant_down	3	-3.92028	0.000169874	yes	gene_down	TF_down	coherent_activation_loss	active_enhancer	0	1	0	1	1	0	0	0	2	2	2	9	yes	2	EH38D4239552	EH38E2727020	dELS	dELS	EH38E2727020;EH38E3908647
peak_0079720	FOSL1	Closing	Fra1	FOSL1	known4.motif	chr9	125700806	125701586	MAPKAP1	-1.24996	0.000653895	intron (NM_001006619, intron 1 of 10)	6012	gene_body	-0.454919	0.0245737	0.454919	concordant_down	3	-2.84522	0.0038438	yes	gene_down	TF_down	coherent_activation_loss	active_enhancer	0	1	0	1	1	0	0	0	2	2	2	9	yes	2	EH38D4239552	EH38E2727020	dELS	dELS	EH38E2727020;EH38E3908647
peak_0079720	FOSL2	Closing	Fra2	FOSL2	known11.motif	chr9	125700806	125701586	MAPKAP1	-1.24996	0.000653895	intron (NM_001006619, intron 1 of 10)	6012	gene_body	-0.454919	0.0245737	0.454919	concordant_down	3	-2.94385	0.00157751	yes	gene_down	TF_down	coherent_activation_loss	active_enhancer	0	1	0	1	1	0	0	0	2	2	2	9	yes	2	EH38D4239552	EH38E2727020	dELS	dELS	EH38E2727020;EH38E3908647
peak_0079720	NFATC1	Closing	NFAT:AP1	NFATC1;NFATC2;NFATC3;NFATC4;JUN;FOS;BATF	known1.motif	chr9	125700806	125701586	MAPKAP1	-1.24996	0.000653895	intron (NM_001006619, intron 1 of 10)	6012	gene_body	-0.454919	0.0245737	0.454919	concordant_down	3	-0.764829	0.0475296	yes	gene_down	TF_down	coherent_activation_loss	active_enhancer	0	1	0	1	1	0	0	0	2	2	2	9	yes	2	EH38D4239552	EH38E2727020	dELS	dELS	EH38E2727020;EH38E3908647
peak_0079720	NFATC1	Closing	NFAT	NFATC1;NFATC2;NFATC3;NFATC4	known2.motif	chr9	125700806	125701586	MAPKAP1	-1.24996	0.000653895	intron (NM_001006619, intron 1 of 10)	6012	gene_body	-0.454919	0.0245737	0.454919	concordant_down	3	-0.764829	0.0475296	yes	gene_down	TF_down	coherent_activation_loss	active_enhancer	0	1	0	1	1	0	0	0	2	2	2	9	yes	2	EH38D4239552	EH38E2727020	dELS	dELS	EH38E2727020;EH38E3908647
peak_0079720	NFKB1	Closing	NFkB-p65	NFKB1;RELA;RELB;NFKB2;REL	known10.motif	chr9	125700806	125701586	MAPKAP1	-1.24996	0.000653895	intron (NM_001006619, intron 1 of 10)	6012	gene_body	-0.454919	0.0245737	0.454919	concordant_down	3	-1.24321	1.12356e-09	yes	gene_down	TF_down	coherent_activation_loss	active_enhancer	0	1	0	1	1	0	0	0	2	2	2	9	yes	2	EH38D4239552	EH38E2727020	dELS	dELS	EH38E2727020;EH38E3908647
peak_0072222	NFATC1	Closing	NFAT:AP1	NFATC1;NFATC2;NFATC3;NFATC4;JUN;FOS;BATF	known1.motif	chr7	114946253	114946387	MDFIC	-1.60777	0.0337264	intron (NM_001166345, intron 3 of 4)	24166	gene_body	-0.7558	0.151202	0.7558	concordant_down	3	-0.764829	0.0475296	yes	gene_not_significant	TF_down	coherent_activation_loss	active_enhancer	0	1	0	1	1	0	0	1	2	2	2	9	yes	1	EH38D4019457	EH38E2583206	dELS	dELS	EH38E2583206
peak_0061752	NFATC1	Closing	NFAT:AP1	NFATC1;NFATC2;NFATC3;NFATC4;JUN;FOS;BATF	known1.motif	chr5	89087259	89087572	MEF2C	-1.13094	0.011221	intron (NR_136221, intron 3 of 6)	-183311	gene_body	-0.251466	1	0.251466	concordant_down	3	-0.764829	0.0475296	yes	gene_not_significant	TF_down	coherent_activation_loss	active_enhancer	0	1	0	1	1	0	0	0	2	2	2	9	yes	2	EH38D3728612	EH38E2389614	dELS	dELS	EH38E2389614;EH38E3648075
peak_0061752	NFATC1	Closing	NFAT	NFATC1;NFATC2;NFATC3;NFATC4	known2.motif	chr5	89087259	89087572	MEF2C	-1.13094	0.011221	intron (NR_136221, intron 3 of 6)	-183311	gene_body	-0.251466	1	0.251466	concordant_down	3	-0.764829	0.0475296	yes	gene_not_significant	TF_down	coherent_activation_loss	active_enhancer	0	1	0	1	1	0	0	0	2	2	2	9	yes	2	EH38D3728612	EH38E2389614	dELS	dELS	EH38E2389614;EH38E3648075
peak_0061752	NFKB1	Closing	NFkB-p50,p52	NFKB1;NFKB2	known13.motif	chr5	89087259	89087572	MEF2C	-1.13094	0.011221	intron (NR_136221, intron 3 of 6)	-183311	gene_body	-0.251466	1	0.251466	concordant_down	3	-1.24321	1.12356e-09	yes	gene_not_significant	TF_down	coherent_activation_loss	active_enhancer	0	1	0	1	1	0	0	0	2	2	2	9	yes	2	EH38D3728612	EH38E2389614	dELS	dELS	EH38E2389614;EH38E3648075
peak_0012495	IRF4	Closing	IRF4	IRF4	known28.motif	chr11	28208718	28209378	METTL15	-1.7169	0.000457578	intron (NM_001113528, intron 3 of 6)	100660	gene_body	-0.234741	0.621599	0.234741	concordant_down	3	-1.96215	1.03297e-08	yes	gene_not_significant	TF_down	coherent_activation_loss	active_enhancer	0	1	0	1	1	0	0	0	2	2	2	9	no	0	.	.	none	.	.
peak_0012495	NFATC1	Closing	NFAT	NFATC1;NFATC2;NFATC3;NFATC4	known2.motif	chr11	28208718	28209378	METTL15	-1.7169	0.000457578	intron (NM_001113528, intron 3 of 6)	100660	gene_body	-0.234741	0.621599	0.234741	concordant_down	3	-0.764829	0.0475296	yes	gene_not_significant	TF_down	coherent_activation_loss	active_enhancer	0	1	0	1	1	0	0	0	2	2	2	9	no	0	.	.	none	.	.
peak_0034924	ATF3	Closing	Atf3	ATF3	known9.motif	chr18	44886951	44887805	MIR4319	-1.27656	2.84814e-08	intron (NM_015559, intron 3 of 5)	82788	gene_body	-0.378056	1	0.378056	concordant_down	3	-3.92028	0.000169874	yes	gene_not_significant	TF_down	coherent_activation_loss	active_enhancer	0	1	1	1	1	0	0	0	2	2	2	9	yes	3	EH38D3002854	EH38E1912866	dELS	dELS	EH38E1912866;EH38E1912867;EH38E3265962
peak_0034924	FOSL1	Closing	Fra1	FOSL1	known4.motif	chr18	44886951	44887805	MIR4319	-1.27656	2.84814e-08	intron (NM_015559, intron 3 of 5)	82788	gene_body	-0.378056	1	0.378056	concordant_down	3	-2.84522	0.0038438	yes	gene_not_significant	TF_down	coherent_activation_loss	active_enhancer	0	1	1	1	1	0	0	0	2	2	2	9	yes	3	EH38D3002854	EH38E1912866	dELS	dELS	EH38E1912866;EH38E1912867;EH38E3265962
peak_0034924	FOSL2	Closing	Fra2	FOSL2	known11.motif	chr18	44886951	44887805	MIR4319	-1.27656	2.84814e-08	intron (NM_015559, intron 3 of 5)	82788	gene_body	-0.378056	1	0.378056	concordant_down	3	-2.94385	0.00157751	yes	gene_not_significant	TF_down	coherent_activation_loss	active_enhancer	0	1	1	1	1	0	0	0	2	2	2	9	yes	3	EH38D3002854	EH38E1912866	dELS	dELS	EH38E1912866;EH38E1912867;EH38E3265962
peak_0034924	FOSL2	Closing	Fosl2	FOSL2	known8.motif	chr18	44886951	44887805	MIR4319	-1.27656	2.84814e-08	intron (NM_015559, intron 3 of 5)	82788	gene_body	-0.378056	1	0.378056	concordant_down	3	-2.94385	0.00157751	yes	gene_not_significant	TF_down	coherent_activation_loss	active_enhancer	0	1	1	1	1	0	0	0	2	2	2	9	yes	3	EH38D3002854	EH38E1912866	dELS	dELS	EH38E1912866;EH38E1912867;EH38E3265962
peak_0034924	NFKB1	Closing	NFkB-p65	NFKB1;RELA;RELB;NFKB2;REL	known10.motif	chr18	44886951	44887805	MIR4319	-1.27656	2.84814e-08	intron (NM_015559, intron 3 of 5)	82788	gene_body	-0.378056	1	0.378056	concordant_down	3	-1.24321	1.12356e-09	yes	gene_not_significant	TF_down	coherent_activation_loss	active_enhancer	0	1	1	1	1	0	0	0	2	2	2	9	yes	3	EH38D3002854	EH38E1912866	dELS	dELS	EH38E1912866;EH38E1912867;EH38E3265962
peak_0034924	NFKB1	Closing	NFkB-p50,p52	NFKB1;NFKB2	known13.motif	chr18	44886951	44887805	MIR4319	-1.27656	2.84814e-08	intron (NM_015559, intron 3 of 5)	82788	gene_body	-0.378056	1	0.378056	concordant_down	3	-1.24321	1.12356e-09	yes	gene_not_significant	TF_down	coherent_activation_loss	active_enhancer	0	1	1	1	1	0	0	0	2	2	2	9	yes	3	EH38D3002854	EH38E1912866	dELS	dELS	EH38E1912866;EH38E1912867;EH38E3265962
peak_0042835	ATF3	Closing	Atf3	ATF3	known9.motif	chr2	111425816	111426446	MIR4435-2HG	-1.13765	1.78501e-05	intron (NR_136164, intron 1 of 4)	69030	gene_body	-0.806932	0.0132145	0.806932	concordant_down	3	-3.92028	0.000169874	yes	gene_down	TF_down	coherent_activation_loss	active_enhancer	0	1	1	1	1	0	0	0	2	2	2	9	yes	1	EH38D5223822	EH38E3364880	dELS	dELS	EH38E3364880
peak_0042835	FOSL1	Closing	Fra1	FOSL1	known4.motif	chr2	111425816	111426446	MIR4435-2HG	-1.13765	1.78501e-05	intron (NR_136164, intron 1 of 4)	69030	gene_body	-0.806932	0.0132145	0.806932	concordant_down	3	-2.84522	0.0038438	yes	gene_down	TF_down	coherent_activation_loss	active_enhancer	0	1	1	1	1	0	0	0	2	2	2	9	yes	1	EH38D5223822	EH38E3364880	dELS	dELS	EH38E3364880
peak_0042835	FOSL2	Closing	Fra2	FOSL2	known11.motif	chr2	111425816	111426446	MIR4435-2HG	-1.13765	1.78501e-05	intron (NR_136164, intron 1 of 4)	69030	gene_body	-0.806932	0.0132145	0.806932	concordant_down	3	-2.94385	0.00157751	yes	gene_down	TF_down	coherent_activation_loss	active_enhancer	0	1	1	1	1	0	0	0	2	2	2	9	yes	1	EH38D5223822	EH38E3364880	dELS	dELS	EH38E3364880
peak_0042835	NFKB1	Closing	NFkB-p65	NFKB1;RELA;RELB;NFKB2;REL	known10.motif	chr2	111425816	111426446	MIR4435-2HG	-1.13765	1.78501e-05	intron (NR_136164, intron 1 of 4)	69030	gene_body	-0.806932	0.0132145	0.806932	concordant_down	3	-1.24321	1.12356e-09	yes	gene_down	TF_down	coherent_activation_loss	active_enhancer	0	1	1	1	1	0	0	0	2	2	2	9	yes	1	EH38D5223822	EH38E3364880	dELS	dELS	EH38E3364880
peak_0042840	IRF4	Closing	IRF4	IRF4	known28.motif	chr2	111478875	111479274	MIR4435-2HG	-1.15827	6.20552e-05	intron (NR_024373, intron 1 of 1)	16086	gene_body	-0.806932	0.0132145	0.806932	concordant_down	3	-1.96215	1.03297e-08	yes	gene_down	TF_down	coherent_activation_loss	active_enhancer	0	1	1	1	1	1	0	0	2	2	2	9	yes	2	EH38D5223864	EH38E3364910	dELS	dELS	EH38E3364910;EH38E3364911
peak_0042840	NFATC1	Closing	NFAT	NFATC1;NFATC2;NFATC3;NFATC4	known2.motif	chr2	111478875	111479274	MIR4435-2HG	-1.15827	6.20552e-05	intron (NR_024373, intron 1 of 1)	16086	gene_body	-0.806932	0.0132145	0.806932	concordant_down	3	-0.764829	0.0475296	yes	gene_down	TF_down	coherent_activation_loss	active_enhancer	0	1	1	1	1	1	0	0	2	2	2	9	yes	2	EH38D5223864	EH38E3364910	dELS	dELS	EH38E3364910;EH38E3364911
peak_0058388	ATF3	Closing	Atf3	ATF3	known9.motif	chr4	85610353	85610895	MIR4451	-1.35762	0.000336849	intron (NM_001025616, intron 2 of 9)	-111844	gene_body	-1.11369	1	1.11369	concordant_down	3	-3.92028	0.000169874	yes	gene_not_significant	TF_down	coherent_activation_loss	active_enhancer	0	1	0	1	1	0	0	0	2	2	2	9	yes	1	EH38D3597429	EH38E2309525	dELS	dELS	EH38E2309525
peak_0058388	IRF4	Closing	IRF4	IRF4	known28.motif	chr4	85610353	85610895	MIR4451	-1.35762	0.000336849	intron (NM_001025616, intron 2 of 9)	-111844	gene_body	-1.11369	1	1.11369	concordant_down	3	-1.96215	1.03297e-08	yes	gene_not_significant	TF_down	coherent_activation_loss	active_enhancer	0	1	0	1	1	0	0	0	2	2	2	9	yes	1	EH38D3597429	EH38E2309525	dELS	dELS	EH38E2309525
peak_0058388	NFATC1	Closing	NFAT:AP1	NFATC1;NFATC2;NFATC3;NFATC4;JUN;FOS;BATF	known1.motif	chr4	85610353	85610895	MIR4451	-1.35762	0.000336849	intron (NM_001025616, intron 2 of 9)	-111844	gene_body	-1.11369	1	1.11369	concordant_down	3	-0.764829	0.0475296	yes	gene_not_significant	TF_down	coherent_activation_loss	active_enhancer	0	1	0	1	1	0	0	0	2	2	2	9	yes	1	EH38D3597429	EH38E2309525	dELS	dELS	EH38E2309525
peak_0058388	NFATC1	Closing	NFAT	NFATC1;NFATC2;NFATC3;NFATC4	known2.motif	chr4	85610353	85610895	MIR4451	-1.35762	0.000336849	intron (NM_001025616, intron 2 of 9)	-111844	gene_body	-1.11369	1	1.11369	concordant_down	3	-0.764829	0.0475296	yes	gene_not_significant	TF_down	coherent_activation_loss	active_enhancer	0	1	0	1	1	0	0	0	2	2	2	9	yes	1	EH38D3597429	EH38E2309525	dELS	dELS	EH38E2309525
peak_0033206	IRF4	Closing	IRF4	IRF4	known28.motif	chr17	69115699	69116419	MIR4524A	-1.17827	0.000293058	intron (NM_080284, intron 11 of 38)	-16427	gene_body	-0.85697	0.0630796	0.85697	concordant_down	3	-1.96215	1.03297e-08	yes	gene_not_significant	TF_down	coherent_activation_loss	active_enhancer	0	1	1	1	1	0	0	1	2	2	2	9	yes	2	EH38D5035347	EH38E3239836	dELS	dELS	EH38E3239836;EH38E3239837
peak_0033206	NFATC1	Closing	NFAT	NFATC1;NFATC2;NFATC3;NFATC4	known2.motif	chr17	69115699	69116419	MIR4524A	-1.17827	0.000293058	intron (NM_080284, intron 11 of 38)	-16427	gene_body	-0.85697	0.0630796	0.85697	concordant_down	3	-0.764829	0.0475296	yes	gene_not_significant	TF_down	coherent_activation_loss	active_enhancer	0	1	1	1	1	0	0	1	2	2	2	9	yes	2	EH38D5035347	EH38E3239836	dELS	dELS	EH38E3239836;EH38E3239837
peak_0033206	RFX5	Closing	Rfx5	RFX5	known108.motif	chr17	69115699	69116419	MIR4524A	-1.17827	0.000293058	intron (NM_080284, intron 11 of 38)	-16427	gene_body	-0.85697	0.0630796	0.85697	concordant_down	3	-0.493972	0.000101039	yes	gene_not_significant	TF_down	coherent_activation_loss	active_enhancer	0	1	1	1	1	0	0	1	2	2	2	9	yes	2	EH38D5035347	EH38E3239836	dELS	dELS	EH38E3239836;EH38E3239837
peak_0034469	EGR2	Closing	Egr2	EGR2	known16.motif	chr18	13562333	13563014	MIR4526	-1.35821	6.44507e-09	intron (NM_181482, intron 4 of 5)	-48440	gene_body	-0.476316	1	0.476316	concordant_down	3	-5.0555	5.55296e-22	yes	gene_not_significant	TF_down	coherent_activation_loss	active_enhancer	0	1	1	1	1	0	0	0	2	2	2	9	yes	2	EH38D5062008	EH38E3258597	dELS	dELS	EH38E3258597;EH38E3258598
peak_0034469	NFKB1	Closing	NFkB-p65	NFKB1;RELA;RELB;NFKB2;REL	known10.motif	chr18	13562333	13563014	MIR4526	-1.35821	6.44507e-09	intron (NM_181482, intron 4 of 5)	-48440	gene_body	-0.476316	1	0.476316	concordant_down	3	-1.24321	1.12356e-09	yes	gene_not_significant	TF_down	coherent_activation_loss	active_enhancer	0	1	1	1	1	0	0	0	2	2	2	9	yes	2	EH38D5062008	EH38E3258597	dELS	dELS	EH38E3258597;EH38E3258598
peak_0079175	NFATC1	Closing	NFAT:AP1	NFATC1;NFATC2;NFATC3;NFATC4;JUN;FOS;BATF	known1.motif	chr9	111915431	111915859	MIR4668	-1.36122	0.000547248	intron (NM_003358, intron 2 of 8)	-16455	gene_body	-0.749952	1	0.749952	concordant_down	3	-0.764829	0.0475296	yes	gene_not_significant	TF_down	coherent_activation_loss	active_enhancer	0	1	1	1	1	0	0	1	2	2	2	9	yes	1	EH38D6055592	EH38E3901781	dELS	dELS	EH38E3901781
peak_0079175	NFATC1	Closing	NFAT	NFATC1;NFATC2;NFATC3;NFATC4	known2.motif	chr9	111915431	111915859	MIR4668	-1.36122	0.000547248	intron (NM_003358, intron 2 of 8)	-16455	gene_body	-0.749952	1	0.749952	concordant_down	3	-0.764829	0.0475296	yes	gene_not_significant	TF_down	coherent_activation_loss	active_enhancer	0	1	1	1	1	0	0	1	2	2	2	9	yes	1	EH38D6055592	EH38E3901781	dELS	dELS	EH38E3901781
peak_0079176	RFX5	Closing	Rfx5	RFX5	known108.motif	chr9	111916207	111916711	MIR4668	-1.0054	6.25983e-05	intron (NM_003358, intron 2 of 8)	-15641	gene_body	-0.749952	1	0.749952	concordant_down	3	-0.493972	0.000101039	yes	gene_not_significant	TF_down	coherent_activation_loss	active_enhancer	0	1	1	1	1	0	0	1	2	2	2	9	yes	2	EH38D6055593	EH38E3901782	dELS	dELS	EH38E3901782;EH38E4504573
peak_0072640	NFATC1	Closing	NFAT	NFATC1;NFATC2;NFATC3;NFATC4	known2.motif	chr7	131218833	131219176	MKLN1-AS	-1.09514	0.00813238	intron (NM_001145354, intron 2 of 18)	108774	gene_body	-0.0786366	1	0.0786366	concordant_down	3	-0.764829	0.0475296	yes	gene_not_significant	TF_down	coherent_activation_loss	active_enhancer	0	1	0	1	1	0	0	0	2	2	2	9	yes	1	EH38D4031537	EH38E2591034	dELS	dELS	EH38E2591034
peak_0033358	NFATC1	Closing	NFAT	NFATC1;NFATC2;NFATC3;NFATC4	known2.motif	chr17	75002329	75002957	MRPL58	-1.19316	0.00311164	intron (NM_014603, intron 4 of 4)	-10027	gene_body	-0.512187	0.0430997	0.512187	concordant_down	3	-0.764829	0.0475296	yes	gene_down	TF_down	coherent_activation_loss	active_enhancer	0	1	0	1	1	1	0	0	2	2	2	9	yes	2	EH38D5040107	EH38E3242949	dELS	dELS	EH38E3242949;EH38E3242950
peak_0014568	NFKB1	Closing	NFkB-p65	NFKB1;RELA;RELB;NFKB2;REL	known10.motif	chr11	96075343	96076294	MTMR2	-1.16125	5.5621e-05	intron (NM_032427, intron 2 of 4)	-151612	gene_body	-0.0650602	1	0.0650602	concordant_down	3	-1.24321	1.12356e-09	yes	gene_not_significant	TF_down	coherent_activation_loss	active_enhancer	0	1	0	1	1	0	0	0	2	2	2	9	yes	1	EH38D4636804	EH38E2979979	dELS	dELS	EH38E2979979
peak_0000542	NFATC1	Closing	NFAT:AP1	NFATC1;NFATC2;NFATC3;NFATC4;JUN;FOS;BATF	known1.motif	chr1	11144002	11144331	MTOR-AS1	-1.06292	0.00909785	intron (NR_046600, intron 1 of 3)	269	gene_body	-0.18374	0.866063	0.18374	concordant_down	3	-0.764829	0.0475296	yes	gene_not_significant	TF_down	coherent_activation_loss	active_enhancer	0	1	0	1	1	0	0	1	2	2	2	9	yes	1	EH38D2126616	EH38E1318642	pELS	pELS	EH38E1318642
peak_0000542	NFATC1	Closing	NFAT	NFATC1;NFATC2;NFATC3;NFATC4	known2.motif	chr1	11144002	11144331	MTOR-AS1	-1.06292	0.00909785	intron (NR_046600, intron 1 of 3)	269	gene_body	-0.18374	0.866063	0.18374	concordant_down	3	-0.764829	0.0475296	yes	gene_not_significant	TF_down	coherent_activation_loss	active_enhancer	0	1	0	1	1	0	0	1	2	2	2	9	yes	1	EH38D2126616	EH38E1318642	pELS	pELS	EH38E1318642
peak_0060940	NFATC1	Closing	NFAT	NFATC1;NFATC2;NFATC3;NFATC4	known2.motif	chr5	55338816	55339512	MTREX	-1.16962	4.03575e-05	intron (NM_015360, intron 5 of 26)	31175	gene_body	-0.545524	0.00523631	0.545524	concordant_down	3	-0.764829	0.0475296	yes	gene_down	TF_down	coherent_activation_loss	active_enhancer	0	1	0	1	1	0	0	0	2	2	2	9	yes	1	EH38D5648831	EH38E3636889	dELS	dELS	EH38E3636889
peak_0060940	TFE3	Closing	TFE3	TFE3	known133.motif	chr5	55338816	55339512	MTREX	-1.16962	4.03575e-05	intron (NM_015360, intron 5 of 26)	31175	gene_body	-0.545524	0.00523631	0.545524	concordant_down	3	-0.309485	0.00608454	yes	gene_down	TF_down	coherent_activation_loss	active_enhancer	0	1	0	1	1	0	0	0	2	2	2	9	yes	1	EH38D5648831	EH38E3636889	dELS	dELS	EH38E3636889
peak_0060279	ATF3	Closing	Atf3	ATF3	known9.motif	chr5	7878617	7878885	MTRR	-1.86118	2.25345e-05	intron (NR_157177, intron 5 of 14)	9603	gene_body	-0.244287	0.300128	0.244287	concordant_down	3	-3.92028	0.000169874	yes	gene_not_significant	TF_down	coherent_activation_loss	active_enhancer	0	1	0	1	1	0	0	1	2	2	2	9	yes	1	EH38D3675038	EH38E2355561	dELS	dELS	EH38E2355561
peak_0060279	FOSL1	Closing	Fra1	FOSL1	known4.motif	chr5	7878617	7878885	MTRR	-1.86118	2.25345e-05	intron (NR_157177, intron 5 of 14)	9603	gene_body	-0.244287	0.300128	0.244287	concordant_down	3	-2.84522	0.0038438	yes	gene_not_significant	TF_down	coherent_activation_loss	active_enhancer	0	1	0	1	1	0	0	1	2	2	2	9	yes	1	EH38D3675038	EH38E2355561	dELS	dELS	EH38E2355561
peak_0060279	FOSL2	Closing	Fra2	FOSL2	known11.motif	chr5	7878617	7878885	MTRR	-1.86118	2.25345e-05	intron (NR_157177, intron 5 of 14)	9603	gene_body	-0.244287	0.300128	0.244287	concordant_down	3	-2.94385	0.00157751	yes	gene_not_significant	TF_down	coherent_activation_loss	active_enhancer	0	1	0	1	1	0	0	1	2	2	2	9	yes	1	EH38D3675038	EH38E2355561	dELS	dELS	EH38E2355561
peak_0060279	FOSL2	Closing	Fosl2	FOSL2	known8.motif	chr5	7878617	7878885	MTRR	-1.86118	2.25345e-05	intron (NR_157177, intron 5 of 14)	9603	gene_body	-0.244287	0.300128	0.244287	concordant_down	3	-2.94385	0.00157751	yes	gene_not_significant	TF_down	coherent_activation_loss	active_enhancer	0	1	0	1	1	0	0	1	2	2	2	9	yes	1	EH38D3675038	EH38E2355561	dELS	dELS	EH38E2355561
peak_0072039	ATF3	Closing	Atf3	ATF3	known9.motif	chr7	106424893	106425653	NAMPT	-1.85744	9.50962e-06	Intergenic	-140290	distal	-1.46586	6.8447e-09	1.46586	concordant_down	3	-3.92028	0.000169874	yes	gene_down	TF_down	coherent_activation_loss	active_enhancer	0	0	0	1	1	1	0	0	2	2	2	9	yes	3	EH38D5884507	EH38E3792322	PLS	PLS;pELS	EH38E3792322;EH38E3792323;EH38E3792324
peak_0072039	FOSL1	Closing	Fra1	FOSL1	known4.motif	chr7	106424893	106425653	NAMPT	-1.85744	9.50962e-06	Intergenic	-140290	distal	-1.46586	6.8447e-09	1.46586	concordant_down	3	-2.84522	0.0038438	yes	gene_down	TF_down	coherent_activation_loss	active_enhancer	0	0	0	1	1	1	0	0	2	2	2	9	yes	3	EH38D5884507	EH38E3792322	PLS	PLS;pELS	EH38E3792322;EH38E3792323;EH38E3792324
peak_0072039	FOSL2	Closing	Fra2	FOSL2	known11.motif	chr7	106424893	106425653	NAMPT	-1.85744	9.50962e-06	Intergenic	-140290	distal	-1.46586	6.8447e-09	1.46586	concordant_down	3	-2.94385	0.00157751	yes	gene_down	TF_down	coherent_activation_loss	active_enhancer	0	0	0	1	1	1	0	0	2	2	2	9	yes	3	EH38D5884507	EH38E3792322	PLS	PLS;pELS	EH38E3792322;EH38E3792323;EH38E3792324
peak_0072039	FOSL2	Closing	Fosl2	FOSL2	known8.motif	chr7	106424893	106425653	NAMPT	-1.85744	9.50962e-06	Intergenic	-140290	distal	-1.46586	6.8447e-09	1.46586	concordant_down	3	-2.94385	0.00157751	yes	gene_down	TF_down	coherent_activation_loss	active_enhancer	0	0	0	1	1	1	0	0	2	2	2	9	yes	3	EH38D5884507	EH38E3792322	PLS	PLS;pELS	EH38E3792322;EH38E3792323;EH38E3792324
peak_0072039	NFKB1	Closing	NFkB-p65	NFKB1;RELA;RELB;NFKB2;REL	known10.motif	chr7	106424893	106425653	NAMPT	-1.85744	9.50962e-06	Intergenic	-140290	distal	-1.46586	6.8447e-09	1.46586	concordant_down	3	-1.24321	1.12356e-09	yes	gene_down	TF_down	coherent_activation_loss	active_enhancer	0	0	0	1	1	1	0	0	2	2	2	9	yes	3	EH38D5884507	EH38E3792322	PLS	PLS;pELS	EH38E3792322;EH38E3792323;EH38E3792324
peak_0072039	NFKB1	Closing	NFkB-p50,p52	NFKB1;NFKB2	known13.motif	chr7	106424893	106425653	NAMPT	-1.85744	9.50962e-06	Intergenic	-140290	distal	-1.46586	6.8447e-09	1.46586	concordant_down	3	-1.24321	1.12356e-09	yes	gene_down	TF_down	coherent_activation_loss	active_enhancer	0	0	0	1	1	1	0	0	2	2	2	9	yes	3	EH38D5884507	EH38E3792322	PLS	PLS;pELS	EH38E3792322;EH38E3792323;EH38E3792324
peak_0040179	ATF3	Closing	Atf3	ATF3	known9.motif	chr2	24577473	24578046	NCOA1	-1.39209	4.51206e-07	intron (NM_001362955, intron 3 of 23)	-6717	gene_body	-0.145217	0.84762	0.145217	concordant_down	3	-3.92028	0.000169874	yes	gene_not_significant	TF_down	coherent_activation_loss	active_enhancer	0	1	0	1	1	0	0	0	2	2	2	9	yes	1	EH38D5172226	EH38E3330982	dELS	dELS	EH38E3330982
peak_0040179	FOSL1	Closing	Fra1	FOSL1	known4.motif	chr2	24577473	24578046	NCOA1	-1.39209	4.51206e-07	intron (NM_001362955, intron 3 of 23)	-6717	gene_body	-0.145217	0.84762	0.145217	concordant_down	3	-2.84522	0.0038438	yes	gene_not_significant	TF_down	coherent_activation_loss	active_enhancer	0	1	0	1	1	0	0	0	2	2	2	9	yes	1	EH38D5172226	EH38E3330982	dELS	dELS	EH38E3330982
peak_0040179	FOSL2	Closing	Fra2	FOSL2	known11.motif	chr2	24577473	24578046	NCOA1	-1.39209	4.51206e-07	intron (NM_001362955, intron 3 of 23)	-6717	gene_body	-0.145217	0.84762	0.145217	concordant_down	3	-2.94385	0.00157751	yes	gene_not_significant	TF_down	coherent_activation_loss	active_enhancer	0	1	0	1	1	0	0	0	2	2	2	9	yes	1	EH38D5172226	EH38E3330982	dELS	dELS	EH38E3330982
peak_0040179	IRF4	Closing	IRF4	IRF4	known28.motif	chr2	24577473	24578046	NCOA1	-1.39209	4.51206e-07	intron (NM_001362955, intron 3 of 23)	-6717	gene_body	-0.145217	0.84762	0.145217	concordant_down	3	-1.96215	1.03297e-08	yes	gene_not_significant	TF_down	coherent_activation_loss	active_enhancer	0	1	0	1	1	0	0	0	2	2	2	9	yes	1	EH38D5172226	EH38E3330982	dELS	dELS	EH38E3330982
peak_0040179	NFATC1	Closing	NFAT	NFATC1;NFATC2;NFATC3;NFATC4	known2.motif	chr2	24577473	24578046	NCOA1	-1.39209	4.51206e-07	intron (NM_001362955, intron 3 of 23)	-6717	gene_body	-0.145217	0.84762	0.145217	concordant_down	3	-0.764829	0.0475296	yes	gene_not_significant	TF_down	coherent_activation_loss	active_enhancer	0	1	0	1	1	0	0	0	2	2	2	9	yes	1	EH38D5172226	EH38E3330982	dELS	dELS	EH38E3330982
peak_0035371	NFATC1	Closing	NFAT	NFATC1;NFATC2;NFATC3;NFATC4	known2.motif	chr18	58101278	58101849	NEDD4L	-1.45231	5.78981e-05	intron (NM_001144964, intron 1 of 30)	-47756	gene_body	-0.0467161	1	0.0467161	concordant_down	3	-0.764829	0.0475296	yes	gene_not_significant	TF_down	coherent_activation_loss	active_enhancer	0	1	1	1	1	1	0	0	2	2	2	9	yes	2	EH38D3013734	EH38E1919905	dELS	dELS	EH38E1919905;EH38E3271122
peak_0064648	NFATC1	Closing	NFAT	NFATC1;NFATC2;NFATC3;NFATC4	known2.motif	chr6	11342733	11343063	NEDD9	-1.26708	0.017707	intron (NR_073131, intron 1 of 9)	39450	gene_body	-0.546927	0.16331	0.546927	concordant_down	3	-0.764829	0.0475296	yes	gene_not_significant	TF_down	coherent_activation_loss	active_enhancer	0	1	0	1	1	0	0	0	2	2	2	9	yes	2	EH38D5729899	EH38E3690675	dELS	dELS	EH38E3690675;EH38E3690676
peak_0064655	NFATC1	Closing	NFAT	NFATC1;NFATC2;NFATC3;NFATC4	known2.motif	chr6	11374139	11375001	NEDD9	-1.08452	1.02132e-07	intron (NR_073131, intron 1 of 9)	7778	gene_body	-0.546927	0.16331	0.546927	concordant_down	3	-0.764829	0.0475296	yes	gene_not_significant	TF_down	coherent_activation_loss	active_enhancer	0	1	1	1	1	0	0	0	2	2	2	9	yes	3	EH38D5729932	EH38E3690706	dELS	dELS	EH38E3690706;EH38E3690707;EH38E4394432
peak_0064655	NFKB1	Closing	NFkB-p65	NFKB1;RELA;RELB;NFKB2;REL	known10.motif	chr6	11374139	11375001	NEDD9	-1.08452	1.02132e-07	intron (NR_073131, intron 1 of 9)	7778	gene_body	-0.546927	0.16331	0.546927	concordant_down	3	-1.24321	1.12356e-09	yes	gene_not_significant	TF_down	coherent_activation_loss	active_enhancer	0	1	1	1	1	0	0	0	2	2	2	9	yes	3	EH38D5729932	EH38E3690706	dELS	dELS	EH38E3690706;EH38E3690707;EH38E4394432
peak_0047834	ATF3	Closing	Atf3	ATF3	known9.motif	chr20	51528741	51530200	NFATC2	-1.02175	3.635e-08	intron (NM_001258292, intron 1 of 9)	13248	gene_body	-0.329881	0.649158	0.329881	concordant_down	3	-3.92028	0.000169874	yes	gene_not_significant	TF_down	coherent_activation_loss	active_enhancer	0	1	1	1	1	0	0	0	2	2	2	9	yes	4	EH38D3310183	EH38E2120907	dELS	dELS	EH38E2120907;EH38E2120908;EH38E3440253;EH38E3440254
peak_0047834	EGR2	Closing	Egr2	EGR2	known16.motif	chr20	51528741	51530200	NFATC2	-1.02175	3.635e-08	intron (NM_001258292, intron 1 of 9)	13248	gene_body	-0.329881	0.649158	0.329881	concordant_down	3	-5.0555	5.55296e-22	yes	gene_not_significant	TF_down	coherent_activation_loss	active_enhancer	0	1	1	1	1	0	0	0	2	2	2	9	yes	4	EH38D3310183	EH38E2120907	dELS	dELS	EH38E2120907;EH38E2120908;EH38E3440253;EH38E3440254
peak_0047834	NFATC1	Closing	NFAT	NFATC1;NFATC2;NFATC3;NFATC4	known2.motif	chr20	51528741	51530200	NFATC2	-1.02175	3.635e-08	intron (NM_001258292, intron 1 of 9)	13248	gene_body	-0.329881	0.649158	0.329881	concordant_down	3	-0.764829	0.0475296	yes	gene_not_significant	TF_down	coherent_activation_loss	active_enhancer	0	1	1	1	1	0	0	0	2	2	2	9	yes	4	EH38D3310183	EH38E2120907	dELS	dELS	EH38E2120907;EH38E2120908;EH38E3440253;EH38E3440254
peak_0047834	NFKB1	Closing	NFkB-p65	NFKB1;RELA;RELB;NFKB2;REL	known10.motif	chr20	51528741	51530200	NFATC2	-1.02175	3.635e-08	intron (NM_001258292, intron 1 of 9)	13248	gene_body	-0.329881	0.649158	0.329881	concordant_down	3	-1.24321	1.12356e-09	yes	gene_not_significant	TF_down	coherent_activation_loss	active_enhancer	0	1	1	1	1	0	0	0	2	2	2	9	yes	4	EH38D3310183	EH38E2120907	dELS	dELS	EH38E2120907;EH38E2120908;EH38E3440253;EH38E3440254
peak_0022769	EGR2	Closing	Egr2	EGR2	known16.motif	chr14	35401293	35401396	NFKBIA	-1.01603	0.00924126	TTS (NM_020529)	3409	distal	-1.68872	9.33619e-09	1.68872	concordant_down	3	-5.0555	5.55296e-22	yes	gene_down	TF_down	coherent_activation_loss	active_enhancer	0	0	1	1	1	0	0	1	2	2	2	9	yes	1	EH38D4808153	EH38E3090919	dELS	dELS	EH38E3090919
peak_0002201	ATF3	Closing	Atf3	ATF3	known9.motif	chr1	40742356	40742980	NFYC	-1.58181	4.74505e-05	intron (NM_001142589, intron 2 of 8)	3832	gene_body	-0.0320151	1	0.0320151	concordant_down	3	-3.92028	0.000169874	yes	gene_not_significant	TF_down	coherent_activation_loss	active_enhancer	0	1	0	1	1	0	0	1	2	2	2	9	yes	2	EH38D2155545	EH38E1340364	dELS	dELS	EH38E1340364;EH38E2805604
peak_0002201	FOSL1	Closing	Fra1	FOSL1	known4.motif	chr1	40742356	40742980	NFYC	-1.58181	4.74505e-05	intron (NM_001142589, intron 2 of 8)	3832	gene_body	-0.0320151	1	0.0320151	concordant_down	3	-2.84522	0.0038438	yes	gene_not_significant	TF_down	coherent_activation_loss	active_enhancer	0	1	0	1	1	0	0	1	2	2	2	9	yes	2	EH38D2155545	EH38E1340364	dELS	dELS	EH38E1340364;EH38E2805604
peak_0002201	FOSL2	Closing	Fra2	FOSL2	known11.motif	chr1	40742356	40742980	NFYC	-1.58181	4.74505e-05	intron (NM_001142589, intron 2 of 8)	3832	gene_body	-0.0320151	1	0.0320151	concordant_down	3	-2.94385	0.00157751	yes	gene_not_significant	TF_down	coherent_activation_loss	active_enhancer	0	1	0	1	1	0	0	1	2	2	2	9	yes	2	EH38D2155545	EH38E1340364	dELS	dELS	EH38E1340364;EH38E2805604
peak_0002201	NFATC1	Closing	NFAT:AP1	NFATC1;NFATC2;NFATC3;NFATC4;JUN;FOS;BATF	known1.motif	chr1	40742356	40742980	NFYC	-1.58181	4.74505e-05	intron (NM_001142589, intron 2 of 8)	3832	gene_body	-0.0320151	1	0.0320151	concordant_down	3	-0.764829	0.0475296	yes	gene_not_significant	TF_down	coherent_activation_loss	active_enhancer	0	1	0	1	1	0	0	1	2	2	2	9	yes	2	EH38D2155545	EH38E1340364	dELS	dELS	EH38E1340364;EH38E2805604
peak_0045672	ATF3	Closing	Atf3	ATF3	known9.motif	chr2	232942603	232943579	NGEF	-1.65583	1.48853e-08	intron (NM_019850, intron 3 of 14)	-14940	gene_body	-0.257501	1	0.257501	concordant_down	3	-3.92028	0.000169874	yes	gene_not_significant	TF_down	coherent_activation_loss	active_enhancer	0	1	0	1	1	0	0	0	2	2	2	9	yes	3	EH38D3257942	EH38E3407329	dELS	dELS;TF	EH38E3407329;EH38E4250367;EH38E3407330
peak_0045672	FOSL1	Closing	Fra1	FOSL1	known4.motif	chr2	232942603	232943579	NGEF	-1.65583	1.48853e-08	intron (NM_019850, intron 3 of 14)	-14940	gene_body	-0.257501	1	0.257501	concordant_down	3	-2.84522	0.0038438	yes	gene_not_significant	TF_down	coherent_activation_loss	active_enhancer	0	1	0	1	1	0	0	0	2	2	2	9	yes	3	EH38D3257942	EH38E3407329	dELS	dELS;TF	EH38E3407329;EH38E4250367;EH38E3407330
peak_0045672	FOSL2	Closing	Fra2	FOSL2	known11.motif	chr2	232942603	232943579	NGEF	-1.65583	1.48853e-08	intron (NM_019850, intron 3 of 14)	-14940	gene_body	-0.257501	1	0.257501	concordant_down	3	-2.94385	0.00157751	yes	gene_not_significant	TF_down	coherent_activation_loss	active_enhancer	0	1	0	1	1	0	0	0	2	2	2	9	yes	3	EH38D3257942	EH38E3407329	dELS	dELS;TF	EH38E3407329;EH38E4250367;EH38E3407330
peak_0045672	FOSL2	Closing	Fosl2	FOSL2	known8.motif	chr2	232942603	232943579	NGEF	-1.65583	1.48853e-08	intron (NM_019850, intron 3 of 14)	-14940	gene_body	-0.257501	1	0.257501	concordant_down	3	-2.94385	0.00157751	yes	gene_not_significant	TF_down	coherent_activation_loss	active_enhancer	0	1	0	1	1	0	0	0	2	2	2	9	yes	3	EH38D3257942	EH38E3407329	dELS	dELS;TF	EH38E3407329;EH38E4250367;EH38E3407330
peak_0045672	NFATC1	Closing	NFAT:AP1	NFATC1;NFATC2;NFATC3;NFATC4;JUN;FOS;BATF	known1.motif	chr2	232942603	232943579	NGEF	-1.65583	1.48853e-08	intron (NM_019850, intron 3 of 14)	-14940	gene_body	-0.257501	1	0.257501	concordant_down	3	-0.764829	0.0475296	yes	gene_not_significant	TF_down	coherent_activation_loss	active_enhancer	0	1	0	1	1	0	0	0	2	2	2	9	yes	3	EH38D3257942	EH38E3407329	dELS	dELS;TF	EH38E3407329;EH38E4250367;EH38E3407330
peak_0045672	NFATC1	Closing	NFAT	NFATC1;NFATC2;NFATC3;NFATC4	known2.motif	chr2	232942603	232943579	NGEF	-1.65583	1.48853e-08	intron (NM_019850, intron 3 of 14)	-14940	gene_body	-0.257501	1	0.257501	concordant_down	3	-0.764829	0.0475296	yes	gene_not_significant	TF_down	coherent_activation_loss	active_enhancer	0	1	0	1	1	0	0	0	2	2	2	9	yes	3	EH38D3257942	EH38E3407329	dELS	dELS;TF	EH38E3407329;EH38E4250367;EH38E3407330
peak_0064817	ATF3	Closing	Atf3	ATF3	known9.motif	chr6	13630297	13631101	NOL7	-1.04189	0.00104465	intron (NM_005493, intron 12 of 13)	15364	gene_body	-0.502016	0.000644895	0.502016	concordant_down	3	-3.92028	0.000169874	yes	gene_down	TF_down	coherent_activation_loss	active_enhancer	0	1	0	1	1	0	0	1	2	2	2	9	yes	2	EH38D5731490	EH38E3691946	dELS	dELS	EH38E3691946;EH38E4394909
peak_0064817	FOSL2	Closing	Fra2	FOSL2	known11.motif	chr6	13630297	13631101	NOL7	-1.04189	0.00104465	intron (NM_005493, intron 12 of 13)	15364	gene_body	-0.502016	0.000644895	0.502016	concordant_down	3	-2.94385	0.00157751	yes	gene_down	TF_down	coherent_activation_loss	active_enhancer	0	1	0	1	1	0	0	1	2	2	2	9	yes	2	EH38D5731490	EH38E3691946	dELS	dELS	EH38E3691946;EH38E4394909
peak_0064817	NFATC1	Closing	NFAT	NFATC1;NFATC2;NFATC3;NFATC4	known2.motif	chr6	13630297	13631101	NOL7	-1.04189	0.00104465	intron (NM_005493, intron 12 of 13)	15364	gene_body	-0.502016	0.000644895	0.502016	concordant_down	3	-0.764829	0.0475296	yes	gene_down	TF_down	coherent_activation_loss	active_enhancer	0	1	0	1	1	0	0	1	2	2	2	9	yes	2	EH38D5731490	EH38E3691946	dELS	dELS	EH38E3691946;EH38E4394909
peak_0064817	NFKB1	Closing	NFkB-p65	NFKB1;RELA;RELB;NFKB2;REL	known10.motif	chr6	13630297	13631101	NOL7	-1.04189	0.00104465	intron (NM_005493, intron 12 of 13)	15364	gene_body	-0.502016	0.000644895	0.502016	concordant_down	3	-1.24321	1.12356e-09	yes	gene_down	TF_down	coherent_activation_loss	active_enhancer	0	1	0	1	1	0	0	1	2	2	2	9	yes	2	EH38D5731490	EH38E3691946	dELS	dELS	EH38E3691946;EH38E4394909
peak_0068537	NFATC1	Closing	NFAT:AP1	NFATC1;NFATC2;NFATC3;NFATC4;JUN;FOS;BATF	known1.motif	chr6	155417826	155418875	NOX3	-1.11188	2.49198e-13	intron (NM_015718, intron 10 of 13)	37488	gene_body	-0.583161	1	0.583161	concordant_down	3	-0.764829	0.0475296	yes	gene_not_significant	TF_down	coherent_activation_loss	active_enhancer	0	1	1	1	1	0	0	0	2	2	2	9	yes	2	EH38D3921202	EH38E2517681	dELS	dELS	EH38E2517681;EH38E3742636
peak_0068537	NFATC1	Closing	NFAT	NFATC1;NFATC2;NFATC3;NFATC4	known2.motif	chr6	155417826	155418875	NOX3	-1.11188	2.49198e-13	intron (NM_015718, intron 10 of 13)	37488	gene_body	-0.583161	1	0.583161	concordant_down	3	-0.764829	0.0475296	yes	gene_not_significant	TF_down	coherent_activation_loss	active_enhancer	0	1	1	1	1	0	0	0	2	2	2	9	yes	2	EH38D3921202	EH38E2517681	dELS	dELS	EH38E2517681;EH38E3742636
peak_0068537	NFKB1	Closing	NFkB-p65	NFKB1;RELA;RELB;NFKB2;REL	known10.motif	chr6	155417826	155418875	NOX3	-1.11188	2.49198e-13	intron (NM_015718, intron 10 of 13)	37488	gene_body	-0.583161	1	0.583161	concordant_down	3	-1.24321	1.12356e-09	yes	gene_not_significant	TF_down	coherent_activation_loss	active_enhancer	0	1	1	1	1	0	0	0	2	2	2	9	yes	2	EH38D3921202	EH38E2517681	dELS	dELS	EH38E2517681;EH38E3742636
peak_0068537	NFKB1	Closing	NFkB-p50,p52	NFKB1;NFKB2	known13.motif	chr6	155417826	155418875	NOX3	-1.11188	2.49198e-13	intron (NM_015718, intron 10 of 13)	37488	gene_body	-0.583161	1	0.583161	concordant_down	3	-1.24321	1.12356e-09	yes	gene_not_significant	TF_down	coherent_activation_loss	active_enhancer	0	1	1	1	1	0	0	0	2	2	2	9	yes	2	EH38D3921202	EH38E2517681	dELS	dELS	EH38E2517681;EH38E3742636
[truncated: 30,177 more rows]
