# Supplementary material
Source: Research Square preprint supplement (doi:10.21203/rs.3.rs-9485118/v1)
Supplement: Supplementary file 5 [file fc8fc4ed047f71bffb339328.xlsx]

## Sheet: CLL_NX5948.IgM_DESeq2_DE_result
GeneID	GeneSymbol.x	Chromosome.x	Start.x	End.x	Class.x	Strand.x	Length.x	baseMean	log2fc	pvalue	padj
ENSG00000000003.15	TSPAN6	chrX	100627108	100639991	protein_coding	-	12883	0.143535	1.62025	0.699224	1
ENSG00000000005.6	TNMD	chrX	100584936	100599885	protein_coding	+	14949	0	NA	NA	NA
ENSG00000000419.14	DPM1	chr20	50934867	50959140	protein_coding	-	24273	699.823	-0.155787	0.0768253	0.465653
ENSG00000000457.14	SCYL3	chr1	169849631	169894267	protein_coding	-	44636	656.574	0.0230913	0.7871	1
ENSG00000000460.17	C1orf112	chr1	169662007	169854080	protein_coding	+	192073	549.605	-0.514283	0.000291991	0.00846253
ENSG00000000938.13	FGR	chr1	27612064	27635185	protein_coding	-	23121	4018.94	0.404131	0.193135	0.797542
ENSG00000000971.16	CFH	chr1	196652043	196747504	protein_coding	+	95461	0.0968966	0	1	1
ENSG00000001036.14	FUCA2	chr6	143494812	143511720	protein_coding	-	16908	379.493	-0.0990784	0.458977	1
ENSG00000001084.13	GCLC	chr6	53497341	53616970	protein_coding	-	119629	2298.09	-0.201664	0.181816	0.772034
ENSG00000001167.15	NFYA	chr6	41072974	41102403	protein_coding	+	29429	1000.96	-0.164569	0.212163	0.841492
ENSG00000001460.18	STPG1	chr1	24356999	24416934	protein_coding	-	59935	161.103	0.327153	0.0552232	0.380038
ENSG00000001461.17	NIPAL3	chr1	24415802	24472976	protein_coding	+	57174	1016.04	0.326643	0.0708279	0.444322
ENSG00000001497.18	LAS1L	chrX	65438549	65534810	protein_coding	-	96261	914.19	-0.313127	0.00264911	0.0444263
ENSG00000001561.7	ENPP4	chr6	46129989	46146688	protein_coding	+	16699	795.915	-0.0240906	0.897617	1
ENSG00000001617.12	SEMA3F	chr3	50155045	50189075	protein_coding	+	34030	0.984394	-0.0912168	0.961366	1
ENSG00000001626.17	CFTR	chr7	117287120	117715971	protein_coding	+	428851	0.794198	-0.397401	0.886049	1
ENSG00000001629.10	ANKIB1	chr7	92245974	92401383	protein_coding	+	155409	1813.92	-0.0629698	0.475525	1
ENSG00000001630.18	CYP51A1	chr7	92084987	92134803	protein_coding	-	49816	89.9911	0.0959384	0.497167	1
ENSG00000001631.17	KRIT1	chr7	92197498	92246166	protein_coding	-	48668	323.393	0.29672	0.093049	0.52297
ENSG00000002016.18	RAD52	chr12	911736	990053	protein_coding	-	78317	415.939	0.265518	0.107032	0.56761
ENSG00000002079.14	MYH16	chr7	99238829	99311130	transcribed_unitary_pseudogene	+	72301	1.84922	1.08119	0.34781	1
ENSG00000002330.14	BAD	chr11	64269830	64284704	protein_coding	-	14874	186.647	0.035863	0.856672	1
ENSG00000002549.13	LAP3	chr4	17577198	17607972	protein_coding	+	30774	546.755	-0.604686	6.33245e-05	0.00267524
ENSG00000002586.20	CD99	chrX	2691187	2741309	protein_coding	+	50122	0.216122	-1.78659	0.655914	1
ENSG00000002586.20_PAR_Y	CD99	chrY	2691187	2741309	protein_coding	+	50122	0.257472	-0.476318	0.845383	1
ENSG00000002587.10	HS3ST1	chr4	11393150	11429564	protein_coding	-	36414	394.567	-0.567905	0.140825	0.664705
ENSG00000002726.21	AOC1	chr7	150824627	150861504	protein_coding	+	36877	0.915459	1.35949	0.46083	1
ENSG00000002745.13	WNT16	chr7	121325367	121341104	protein_coding	+	15737	529.089	-0.421287	0.307164	1
ENSG00000002746.15	HECW1	chr7	43112629	43566001	protein_coding	+	453372	0.506078	0.245027	0.936479	1
ENSG00000002822.16	MAD1L1	chr7	1815793	2233243	protein_coding	-	417450	27.3544	0.518414	0.257759	0.932971
ENSG00000002834.18	LASP1	chr17	38869859	38921770	protein_coding	+	51911	4460.52	-0.333185	0.00355229	0.0554893
ENSG00000002919.15	SNX11	chr17	48103357	48123601	protein_coding	+	20244	836.192	-0.962221	4.54383e-08	9.00068e-06
ENSG00000002933.9	TMEM176A	chr7	150800403	150805118	protein_coding	+	4715	0.971749	2.9745	0.181277	0.77096
ENSG00000003056.8	M6PR	chr12	8940361	8949761	protein_coding	-	9400	2515.79	-0.244434	0.114409	0.590307
ENSG00000003096.14	KLHL13	chrX	117897813	118117340	protein_coding	-	219527	0.908426	0.365282	0.806318	1
ENSG00000003137.9	CYP26B1	chr2	72129238	72147862	protein_coding	-	18624	0.27977	0.245027	0.949222	1
ENSG00000003147.19	ICA1	chr7	8113184	8262687	protein_coding	-	149503	4.72363	0.21857	0.758603	1
ENSG00000003249.15	DBNDD1	chr16	90004871	90019890	protein_coding	-	15019	86.7423	1.05597	0.208598	0.83398
ENSG00000003393.16	ALS2	chr2	201700267	201782112	protein_coding	-	81845	366.7	-0.294326	0.00889552	0.107914
ENSG00000003400.15	CASP10	chr2	201182898	201229406	protein_coding	+	46508	72.9627	0.904006	0.132552	0.642571
ENSG00000003402.21	CFLAR	chr2	201116154	201176687	protein_coding	+	60533	4174.66	-0.416514	0.0204856	0.193277
ENSG00000003436.16	TFPI	chr2	187464230	187565760	protein_coding	-	101530	0.0968966	0	1	1
ENSG00000003509.16	NDUFAF7	chr2	37231631	37253403	protein_coding	+	21772	541.653	0.149684	0.232699	0.884241
ENSG00000003756.17	RBM5	chr3	50088919	50119021	protein_coding	+	30102	5623.64	0.503274	0.000290415	0.00842445
ENSG00000003987.14	MTMR7	chr8	17296794	17413528	protein_coding	-	116734	118.751	0.0420332	0.734066	1
ENSG00000003989.18	SLC7A2	chr8	17497088	17570573	protein_coding	+	73485	0.233007	0.245026	0.953546	1
ENSG00000004059.11	ARF5	chr7	127588386	127591700	protein_coding	+	3314	831.58	-0.38545	0.00297246	0.0484325
ENSG00000004139.14	SARM1	chr17	28364356	28404049	protein_coding	+	39693	933.87	0.156095	0.346385	1
ENSG00000004142.12	POLDIP2	chr17	28346633	28357527	protein_coding	-	10894	1169.66	-0.655399	4.94746e-05	0.00223944
ENSG00000004399.13	PLXND1	chr3	129555214	129606676	protein_coding	-	51462	1257.36	1.35165	0.000294192	0.00850437
ENSG00000004455.17	AK2	chr1	33007940	33080996	protein_coding	-	73056	2071.23	-0.440908	0.000502037	0.012768
ENSG00000004468.13	CD38	chr4	15778275	15853232	protein_coding	+	74957	19.8273	0.763154	0.741273	1
ENSG00000004478.8	FKBP4	chr12	2794970	2805423	protein_coding	+	10453	1449.66	-0.568146	0.00842424	0.103955
ENSG00000004487.18	KDM1A	chr1	23019443	23083689	protein_coding	+	64246	1383.25	0.255217	0.0686124	0.43588
ENSG00000004534.15	RBM6	chr3	49940007	50100045	protein_coding	+	160038	3595.06	0.33545	0.0310871	0.258788
ENSG00000004660.15	CAMKK1	chr17	3860315	3894891	protein_coding	-	34576	246.653	-0.538744	0.0433963	0.32435
ENSG00000004700.16	RECQL	chr12	21468910	21501669	protein_coding	-	32759	2193.43	-0.103479	0.36937	1
ENSG00000004766.17	VPS50	chr7	93232340	93361123	protein_coding	+	128783	723.24	0.0825672	0.337121	1
ENSG00000004776.13	HSPB6	chr19	35754566	35758079	protein_coding	-	3513	0.436759	-0.786785	0.689669	1
ENSG00000004777.19	ARHGAP33	chr19	35774532	35788822	protein_coding	+	14290	254.595	0.559771	0.101607	0.550849
ENSG00000004779.10	NDUFAB1	chr16	23581014	23596316	protein_coding	-	15302	362.728	-0.740297	1.06227e-06	0.000110471
ENSG00000004799.8	PDK4	chr7	95583499	95596516	protein_coding	-	13017	487.714	0.84563	0.0985846	0.540733
ENSG00000004809.14	SLC22A16	chr6	110424687	110476641	protein_coding	-	51954	0	NA	NA	NA
ENSG00000004838.14	ZMYND10	chr3	50341110	50345732	protein_coding	-	4622	39.2277	0.654179	0.0138572	0.148489
ENSG00000004846.17	ABCB5	chr7	20615667	20777038	protein_coding	+	161371	0.0645977	0	1	1
ENSG00000004848.8	ARX	chrX	25003694	25016420	protein_coding	-	12726	0.0915297	-0.476315	0.909837	1
ENSG00000004864.14	SLC25A13	chr7	96120220	96322147	protein_coding	-	201927	250.504	-0.272149	0.0187538	0.182831
ENSG00000004866.22	ST7	chr7	116953238	117230176	protein_coding	+	276938	148.413	-0.243802	0.302611	1
ENSG00000004897.12	CDC27	chr17	47117703	47189422	protein_coding	-	71719	1160.55	-0.0413515	0.723738	1
ENSG00000004939.16	SLC4A1	chr17	44248390	44268141	protein_coding	-	19751	0.846082	-1.70989	0.480436	1
ENSG00000004948.16	CALCR	chr7	93424486	93574730	protein_coding	-	150244	0.0802819	0	1	1
ENSG00000004961.15	HCCS	chrX	11111301	11123086	protein_coding	+	11785	497.086	-0.242583	0.0187226	0.182693
ENSG00000004975.12	DVL2	chr17	7225342	7234517	protein_coding	-	9175	1487.92	0.0604765	0.589461	1
ENSG00000005001.10	PRSS22	chr16	2852730	2858170	protein_coding	-	5440	0	NA	NA	NA
ENSG00000005007.13	UPF1	chr19	18831959	18868230	protein_coding	+	36271	3169.76	-0.159119	0.0436721	0.325864
ENSG00000005020.13	SKAP2	chr7	26667068	26995239	protein_coding	-	328171	1574.89	-0.144174	0.43718	1
ENSG00000005022.6	SLC25A5	chrX	119468422	119471396	protein_coding	+	2974	2542.8	-0.556978	0.0049108	0.07032
ENSG00000005059.16	MCUB	chr4	109560209	109688719	protein_coding	+	128510	1033.13	0.394473	0.0777074	0.468678
ENSG00000005073.6	HOXA11	chr7	27181157	27185232	protein_coding	-	4075	0.0314102	0	1	1
ENSG00000005075.16	POLR2J	chr7	102473128	102478922	protein_coding	-	5794	459.202	-0.0502076	0.714294	1
ENSG00000005100.13	DHX33	chr17	5440917	5468982	protein_coding	-	28065	514.087	-0.638809	6.07983e-06	0.00043449
ENSG00000005102.14	MEOX1	chr17	43640389	43661922	protein_coding	-	21533	0.0645977	0	1	1
ENSG00000005108.17	THSD7A	chr7	11370365	11832198	protein_coding	-	461833	0.1536	-0.476315	0.909837	1
ENSG00000005156.12	LIG3	chr17	34980512	35009743	protein_coding	+	29231	841.755	-0.418025	0.000640097	0.0152852
ENSG00000005175.10	RPAP3	chr12	47661249	47706030	protein_coding	-	44781	844.889	-0.103488	0.367141	1
ENSG00000005187.12	ACSM3	chr16	20610243	20797581	protein_coding	+	187338	706.73	1.00006	0.000265335	0.00788385
ENSG00000005189.20	REXO5	chr16	20806429	20849665	protein_coding	+	43236	12.2831	0.147249	0.685903	1
ENSG00000005194.15	CIAPIN1	chr16	57428187	57447420	protein_coding	-	19233	499.423	-0.629701	3.79929e-06	0.000302765
ENSG00000005206.17	SPPL2B	chr19	2328615	2355095	protein_coding	+	26480	1324.09	0.57093	0.0329687	0.269014
ENSG00000005238.20	FAM214B	chr9	35104112	35116341	protein_coding	-	12229	249.229	0.432124	0.0453664	0.333804
ENSG00000005243.10	COPZ2	chr17	48026167	48038030	protein_coding	-	11863	33.5469	-1.52537	0.0422204	0.318151
ENSG00000005249.13	PRKAR2B	chr7	107044705	107161811	protein_coding	+	117106	2.38512	0.149592	0.874413	1
ENSG00000005302.19	MSL3	chrX	11758159	11775772	protein_coding	+	17613	2287.05	0.52809	0.00566637	0.0783349
ENSG00000005339.15	CREBBP	chr16	3725054	3880713	protein_coding	-	155659	5707.45	0.090702	0.511592	1
ENSG00000005379.17	TSPOAP1	chr17	58301228	58328795	protein_coding	-	27567	78.8629	0.00717974	0.978214	1
ENSG00000005381.8	MPO	chr17	58269855	58280935	protein_coding	-	11080	0.605875	-1.6322	0.504697	1
ENSG00000005421.9	PON1	chr7	95297676	95324532	protein_coding	-	26856	0.569731	0.55812	0.860179	1
ENSG00000005436.14	GCFC2	chr2	75652000	75710985	protein_coding	-	58985	515.479	-0.272737	0.0717202	0.447698
ENSG00000005448.17	WDR54	chr2	74421678	74425755	protein_coding	+	4077	292.078	0.197906	0.120049	0.608038
ENSG00000005469.12	CROT	chr7	87345664	87399794	protein_coding	+	54130	290.885	0.235814	0.124655	0.621455
ENSG00000005471.19	ABCB4	chr7	87401696	87480435	protein_coding	-	78739	715.372	-0.288408	0.280728	0.971929
ENSG00000005483.22	KMT2E	chr7	104940943	105115019	protein_coding	+	174076	4582.3	0.0231433	0.863632	1
ENSG00000005486.17	RHBDD2	chr7	75842602	75888926	protein_coding	+	46324	623.364	0.0130281	0.922634	1
ENSG00000005513.10	SOX8	chr16	981770	986979	protein_coding	+	5209	8.36302	0.657656	0.437888	1
ENSG00000005700.15	IBTK	chr6	82169986	82247754	protein_coding	-	77768	0.286817	-0.476315	0.909837	1
ENSG00000005801.18	ZNF195	chr11	3339261	3379222	protein_coding	-	39961	529.338	-0.0793502	0.652641	1
ENSG00000005810.19	MYCBP2	chr13	77042474	77327094	protein_coding	-	284620	4932.41	0.104728	0.562739	1
ENSG00000005812.11	FBXL3	chr13	76992598	77027195	protein_coding	-	34597	2434.47	0.276156	0.0809244	0.479871
ENSG00000005844.19	ITGAL	chr16	30472658	30523567	protein_coding	+	50909	1866.43	0.470282	0.329454	1
ENSG00000005882.12	PDK2	chr17	50094737	50112152	protein_coding	+	17415	506.754	0.360977	0.00107833	0.0227948
ENSG00000005884.18	ITGA3	chr17	50055968	50090481	protein_coding	+	34513	559.886	0.191434	0.437953	1
ENSG00000005889.16	ZFX	chrX	24149173	24216255	protein_coding	+	67082	1328.95	0.020181	0.914547	1
ENSG00000005893.16	LAMP2	chrX	120426148	120469365	protein_coding	-	43217	1634.18	-0.194332	0.16018	0.71809
ENSG00000005961.19	ITGA2B	chr17	44372180	44389649	protein_coding	-	17469	2.45733	-0.440447	0.560284	1
ENSG00000005981.13	ASB4	chr7	95478444	95540233	protein_coding	+	61789	0.352422	0.245027	0.946818	1
ENSG00000006007.12	GDE1	chr16	19501693	19522123	protein_coding	-	20430	685.912	0.158334	0.215608	0.848139
ENSG00000006015.18	REX1BD	chr19	18588685	18592337	protein_coding	+	3652	998.983	-0.0355073	0.840383	1
ENSG00000006016.12	CRLF1	chr19	18572220	18607741	protein_coding	-	35521	177.145	-0.11959	0.346702	1
ENSG00000006025.12	OSBPL7	chr17	47807372	47821834	protein_coding	-	14462	728.169	0.322075	0.0795511	0.47525
ENSG00000006042.12	TMEM98	chr17	32927910	32945106	protein_coding	+	17196	0.070636	-0.836985	0.842268	1
ENSG00000006047.13	YBX2	chr17	7288263	7294639	protein_coding	-	6376	0	NA	NA	NA
ENSG00000006059.4	KRT33A	chr17	41346092	41350828	protein_coding	-	4736	0	NA	NA	NA
ENSG00000006062.18	MAP3K14	chr17	45263119	45317029	protein_coding	-	53910	2730.08	0.387495	0.00372308	0.0572966
ENSG00000006071.16	ABCC8	chr11	17392498	17476894	protein_coding	-	84396	72.0887	0.623876	0.478506	1
ENSG00000006116.4	CACNG3	chr16	24256335	24362412	protein_coding	+	106077	0.277711	0.605699	0.85109	1
ENSG00000006118.15	TMEM132A	chr11	60924460	60937159	protein_coding	+	12699	80.1185	-0.254993	0.27125	0.957282
ENSG00000006125.18	AP2B1	chr17	35578046	35726413	protein_coding	+	148367	3864.25	-0.31022	0.00766712	0.0969708
ENSG00000006128.12	TAC1	chr7	97732084	97740472	protein_coding	+	8388	0	NA	NA	NA
ENSG00000006194.10	ZNF263	chr16	3263800	3301401	protein_coding	+	37601	1116.47	-0.159093	0.0234687	0.212784
ENSG00000006210.7	CX3CL1	chr16	57372477	57385044	protein_coding	+	12567	0.0968966	0	1	1
ENSG00000006282.21	SPATA20	chr17	50543058	50555852	protein_coding	+	12794	1149.1	0.0480017	0.858695	1
ENSG00000006283.18	CACNA1G	chr17	50560715	50627474	protein_coding	+	66759	0.440513	-0.749136	0.785249	1
ENSG00000006327.14	TNFRSF12A	chr16	3018445	3022383	protein_coding	+	3938	40.6051	-0.434881	0.349657	1
ENSG00000006377.11	DLX6	chr7	97005553	97011040	protein_coding	+	5487	0.0968966	0	1	1
ENSG00000006432.16	MAP3K9	chr14	70722526	70809534	protein_coding	-	87008	1199.59	0.413324	0.0104358	0.121424
ENSG00000006451.8	RALA	chr7	39623565	39708120	protein_coding	+	84555	575.515	-0.149526	0.124656	0.621455
ENSG00000006453.14	BAIAP2L1	chr7	98291650	98401090	protein_coding	-	109440	40.176	-0.337627	0.567191	1
ENSG00000006459.11	KDM7A	chr7	140084746	140176983	protein_coding	-	92237	1959.49	0.71525	0.000469362	0.0121497
ENSG00000006468.14	ETV1	chr7	13891229	13991425	protein_coding	-	100196	0.10727	-0.476315	0.909837	1
ENSG00000006530.18	AGK	chr7	141551278	141655244	protein_coding	+	103966	80.7741	-0.9321	0.000103725	0.00380827
ENSG00000006534.17	ALDH3B1	chr11	68008578	68029282	protein_coding	+	20704	36.5043	-0.631193	0.149099	0.687645
ENSG00000006555.11	TTC22	chr1	54779712	54801323	protein_coding	-	21611	184.527	0.0814698	0.696086	1
ENSG00000006576.16	PHTF2	chr7	77798792	77957503	protein_coding	+	158711	1875.62	0.250249	0.115092	0.592674
ENSG00000006606.9	CCL26	chr7	75769533	75789896	protein_coding	-	20363	0.226092	0	1	1
ENSG00000006607.14	FARP2	chr2	241356285	241494841	protein_coding	+	138556	1388.45	0.237425	0.0240008	0.216007
ENSG00000006611.17	USH1C	chr11	17493895	17544416	protein_coding	-	50521	0.0968966	0	1	1
ENSG00000006625.18	GGCT	chr7	30496621	30504841	protein_coding	-	8220	62.3102	-0.357083	0.170572	0.746156
ENSG00000006634.8	DBF4	chr7	87876216	87909553	protein_coding	+	33337	359.395	-0.207919	0.0768752	0.46582
ENSG00000006638.13	TBXA2R	chr19	3594507	3606875	protein_coding	-	12368	152.403	0.825272	0.0934688	0.524146
ENSG00000006652.15	IFRD1	chr7	112422887	112481017	protein_coding	+	58130	122.141	0.18437	0.316686	1
ENSG00000006659.13	LGALS14	chr19	39704481	39709444	protein_coding	+	4963	0	NA	NA	NA
ENSG00000006695.12	COX10	chr17	14069490	14231736	protein_coding	+	162246	290.353	-0.616469	5.9623e-05	0.00257549
ENSG00000006704.11	GTF2IRD1	chr7	74453790	74602605	protein_coding	+	148815	10.7662	-1.22582	0.545474	1
ENSG00000006712.15	PAF1	chr19	39385629	39391154	protein_coding	-	5525	1600.17	-0.0447715	0.55886	1
ENSG00000006715.16	VPS41	chr7	38722974	38932394	protein_coding	-	209420	1301.9	-0.0524993	0.679677	1
ENSG00000006740.18	ARHGAP44	chr17	12789498	12991643	protein_coding	+	202145	2246.34	-0.771419	0.01702	0.171115
ENSG00000006744.19	ELAC2	chr17	12991612	13018065	protein_coding	-	26453	1521.72	-0.183849	0.0112192	0.127481
ENSG00000006747.15	SCIN	chr7	12570577	12660182	protein_coding	+	89605	1.49511	2.23285	0.367457	1
ENSG00000006756.16	ARSD	chrX	2903972	2929349	protein_coding	-	25377	359.897	0.273739	0.825577	1
ENSG00000006757.12	PNPLA4	chrX	7898247	7927739	protein_coding	-	29492	138.296	-0.279782	0.192618	0.796317
ENSG00000006788.14	MYH13	chr17	10300865	10373130	protein_coding	-	72265	0.129195	0	1	1
ENSG00000006831.10	ADIPOR2	chr12	1688574	1788674	protein_coding	+	100100	0.294327	0.245027	0.939108	1
ENSG00000006837.12	CDKL3	chr5	134286350	134371047	protein_coding	-	84697	12.2561	-0.0725087	0.826288	1
ENSG00000007001.13	UPP2	chr2	157876702	158136154	protein_coding	+	259452	0.879113	1.14841	0.447761	1
ENSG00000007038.11	PRSS21	chr16	2817180	2826304	protein_coding	+	9124	9.86248	2.45037	0.347825	1
ENSG00000007047.16	MARK4	chr19	45079288	45305284	protein_coding	+	225996	426.238	0.0354317	0.778354	1
ENSG00000007062.12	PROM1	chr4	15963076	16084378	protein_coding	-	121302	0.879883	-0.806672	0.632696	1
ENSG00000007080.11	CCDC124	chr19	17933015	17943991	protein_coding	+	10976	531.585	-0.526405	4.78128e-05	0.00219285
ENSG00000007129.18	CEACAM21	chr19	41549518	41586844	protein_coding	+	37326	26.2828	-0.282713	0.554499	1
ENSG00000007168.14	PAFAH1B1	chr17	2593210	2685615	protein_coding	+	92405	4324.15	-0.0744294	0.27532	0.963309
ENSG00000007171.18	NOS2	chr17	27756766	27800529	protein_coding	-	43763	5.0354	0.752653	0.263857	0.943888
ENSG00000007174.18	DNAH9	chr17	11598470	11969748	protein_coding	+	371278	0.444691	2.26831	0.340521	1
ENSG00000007202.15	KIAA0100	chr17	28614446	28645454	protein_coding	-	31008	4792.81	0.12178	0.198214	0.810112
ENSG00000007216.16	SLC13A2	chr17	28473293	28497781	protein_coding	+	24488	0.0769551	0.605697	0.885497	1
ENSG00000007237.19	GAS7	chr17	9910606	10198606	protein_coding	-	288000	1.38853	-0.285013	0.847284	1
ENSG00000007255.10	TRAPPC6A	chr19	45162928	45178237	protein_coding	-	15309	322.941	-0.177071	0.116164	0.595393
ENSG00000007264.15	MATK	chr19	3777970	3802129	protein_coding	-	24159	0.390266	0.245028	0.92841	1
ENSG00000007306.15	CEACAM7	chr19	41673303	41706976	protein_coding	-	33673	0.0968966	0	1	1
ENSG00000007312.13	CD79B	chr17	63928740	63932336	protein_coding	-	3596	2476.68	0.656375	0.000136962	0.00476764
ENSG00000007314.12	SCN4A	chr17	63938554	63972918	protein_coding	-	34364	174.103	0.533156	0.128443	0.632426
ENSG00000007341.19	ST7L	chr1	112523514	112620825	protein_coding	-	97311	248.971	-0.110506	0.463916	1
ENSG00000007350.17	TKTL1	chrX	154295795	154330350	protein_coding	+	34555	17.2647	0.00421861	0.996756	1
ENSG00000007372.25	PAX6	chr11	31784779	31817961	protein_coding	-	33182	49.7258	0.331587	0.182652	0.773643
ENSG00000007376.8	RPUSD1	chr16	784974	788397	protein_coding	-	3423	500.333	-0.0475396	0.762733	1
ENSG00000007384.15	RHBDF1	chr16	58059	76355	protein_coding	-	18296	73.4722	-0.87185	0.135717	0.65191
ENSG00000007392.17	LUC7L	chr16	188969	229463	protein_coding	-	40494	2119.41	0.458185	0.0419286	0.316818
ENSG00000007402.12	CACNA2D2	chr3	50362613	50504244	protein_coding	-	141631	177.317	1.03968	0.000273437	0.0080722
ENSG00000007516.14	BAIAP3	chr16	1333638	1349441	protein_coding	+	15803	2902.68	1.35878	0.0016929	0.031707
ENSG00000007520.4	TSR3	chr16	1349240	1351878	protein_coding	-	2638	784.482	0.175019	0.131341	0.639653
ENSG00000007541.17	PIGQ	chr16	566995	584109	protein_coding	+	17114	392.821	-0.0544378	0.695633	1
ENSG00000007545.16	CRAMP1	chr16	1612337	1677908	protein_coding	+	65571	778.872	-0.050352	0.74805	1
ENSG00000007866.22	TEAD3	chr6	35473597	35497079	protein_coding	-	23482	3.15923	-1.31437	0.127361	0.629266
ENSG00000007908.16	SELE	chr1	169722640	169764705	protein_coding	-	42065	6.49439	-2.22887	0.0037908	0.0579955
ENSG00000007923.17	DNAJC11	chr1	6634168	6701924	protein_coding	-	67756	1075.4	-0.180671	0.0793807	0.474591
ENSG00000007933.13	FMO3	chr1	171090901	171117819	protein_coding	+	26918	5.48195	1.51438	0.0381328	0.296052
ENSG00000007944.15	MYLIP	chr6	16129086	16148248	protein_coding	+	19162	1837.46	0.919301	2.05598e-05	0.00116202
ENSG00000007952.18	NOX1	chrX	100843324	100874359	protein_coding	-	31035	8.24379	-0.482073	0.209789	0.836532
ENSG00000007968.7	E2F2	chr1	23506438	23531233	protein_coding	-	24795	0.108381	0.245026	0.953546	1
ENSG00000008018.9	PSMB1	chr6	170535120	170553307	protein_coding	-	18187	1586.99	-0.632529	2.14501e-06	0.000194397
ENSG00000008056.14	SYN1	chrX	47571901	47619857	protein_coding	-	47956	11.133	-0.0709676	0.8417	1
ENSG00000008083.14	JARID2	chr6	15246069	15522042	protein_coding	+	275973	1013.81	-0.221588	0.133263	0.644442
ENSG00000008086.13	CDKL5	chrX	18425583	18653629	protein_coding	+	228046	76.0997	-0.128362	0.907634	1
ENSG00000008118.10	CAMK1G	chr1	209583714	209613939	protein_coding	+	30225	0.129195	0	1	1
ENSG00000008128.23	CDK11A	chr1	1702379	1724357	protein_coding	-	21978	46.9084	0.556712	0.024691	0.220653
ENSG00000008130.15	NADK	chr1	1751232	1780457	protein_coding	-	29225	2681.44	0.150509	0.248908	0.917173
ENSG00000008196.13	TFAP2B	chr6	50818723	50847619	protein_coding	+	28896	0	NA	NA	NA
ENSG00000008197.5	TFAP2D	chr6	50713526	50773033	protein_coding	+	59507	0.161494	0	1	1
ENSG00000008226.20	DLEC1	chr3	38039205	38124025	protein_coding	+	84820	231.163	0.27023	0.095599	0.530797
ENSG00000008256.16	CYTH3	chr7	6161776	6272644	protein_coding	-	110868	30.3378	0.0912473	0.889682	1
ENSG00000008277.15	ADAM22	chr7	87934143	88202889	protein_coding	+	268746	50.0727	0.713717	0.188696	0.78801
ENSG00000008282.9	SYPL1	chr7	106090505	106112576	protein_coding	-	22071	2103.2	0.471698	0.035248	0.281483
ENSG00000008283.16	CYB561	chr17	63432304	63446354	protein_coding	-	14050	41.1266	-0.758786	0.540757	1
ENSG00000008294.22	SPAG9	chr17	50962174	51120868	protein_coding	-	158694	1528.65	-0.356568	0.00225036	0.0392497
ENSG00000008300.17	CELSR3	chr3	48636463	48662886	protein_coding	-	26423	1028.13	-0.148535	0.678689	1
ENSG00000008311.16	AASS	chr7	122064583	122144308	protein_coding	-	79725	47.5071	-0.860768	0.388719	1
ENSG00000008323.16	PLEKHG6	chr12	6310436	6328506	protein_coding	+	18070	2.97593	-0.162923	0.894451	1
ENSG00000008324.12	SS18L2	chr3	42581840	42596934	protein_coding	+	15094	440.37	-0.0925245	0.271008	0.956994
ENSG00000008382.16	MPND	chr19	4343527	4360086	protein_coding	+	16559	341.323	-0.257666	0.0611526	0.405197
ENSG00000008394.13	MGST1	chr12	16347142	16609259	protein_coding	+	262117	0.0968966	0	1	1
ENSG00000008405.12	CRY1	chr12	106991364	107093549	protein_coding	-	102185	291.661	-0.294287	0.885561	1
ENSG00000008438.5	PGLYRP1	chr19	46019153	46023053	protein_coding	-	3900	3.47808	0.489034	0.561468	1
ENSG00000008441.19	NFIX	chr19	12995475	13098796	protein_coding	+	103321	75.7065	-0.0485175	0.886843	1
ENSG00000008513.16	ST3GAL1	chr8	133454848	133571940	protein_coding	-	117092	2202.96	0.0885165	0.758332	1
ENSG00000008516.18	MMP25	chr16	3046062	3060726	protein_coding	+	14664	36.9139	0.339029	0.485581	1
ENSG00000008517.19	IL32	chr16	3065297	3082192	protein_coding	+	16895	3.05342	-0.711736	0.482875	1
ENSG00000008710.20	PKD1	chr16	2088708	2135898	protein_coding	-	47190	2366.28	0.280874	0.013342	0.144118
ENSG00000008735.14	MAPK8IP2	chr22	50600793	50613981	protein_coding	+	13188	18.7457	0.187818	0.504464	1
ENSG00000008838.21	MED24	chr17	40019097	40061215	protein_coding	-	42118	1642.77	-0.12226	0.0978002	0.537849
ENSG00000008853.18	RHOBTB2	chr8	22987417	23020509	protein_coding	+	33092	4383.04	-1.02142	0.00351916	0.055096
ENSG00000008869.12	HEATR5B	chr2	36968383	37084372	protein_coding	-	115989	2149.11	0.00403222	0.982444	1
ENSG00000008952.17	SEC62	chr3	169966635	169998373	protein_coding	+	31738	4122.49	-0.0336251	0.774894	1
ENSG00000008988.11	RPS20	chr8	56067254	56074510	protein_coding	-	7256	14243.9	0.0671173	0.447587	1
ENSG00000009307.17	CSDE1	chr1	114716913	114758676	protein_coding	-	41763	10718.4	0.0859575	0.363523	1
ENSG00000009335.18	UBE3C	chr7	157138916	157269370	protein_coding	+	130454	1767.4	-0.233168	0.0819853	0.483401
ENSG00000009413.16	REV3L	chr6	111299028	111483715	protein_coding	-	184687	1404.09	-0.318116	0.120589	0.609273
ENSG00000009694.13	TENM1	chrX	124375903	124963817	protein_coding	-	587914	0.206151	0.605697	0.885497	1
ENSG00000009709.12	PAX7	chr1	18630846	18748866	protein_coding	+	118020	0.129195	0	1	1
ENSG00000009724.17	MASP2	chr1	11026523	11047239	protein_coding	-	20716	240.116	0.56649	0.00789224	0.0990929
ENSG00000009765.15	IYD	chr6	150368892	150405969	protein_coding	+	37077	0.193793	0	1	1
ENSG00000009780.16	FAM76A	chr1	27725961	27763116	protein_coding	+	37155	329.823	0.291296	0.0126985	0.139526
ENSG00000009790.15	TRAF3IP3	chr1	209756032	209782320	protein_coding	+	26288	3963.8	0.638222	0.000635816	0.0152256
ENSG00000009830.13	POMT2	chr14	77274956	77320883	protein_coding	-	45927	428.586	0.311996	0.0780845	0.46999
ENSG00000009844.16	VTA1	chr6	142147162	142224685	protein_coding	+	77523	670.816	-0.361677	0.00599208	0.0817778
ENSG00000009950.16	MLXIPL	chr7	73593194	73624543	protein_coding	-	31349	0.137474	-0.836985	0.842268	1
ENSG00000009954.11	BAZ1B	chr7	73440406	73522293	protein_coding	-	81887	2694.44	-0.0701018	0.544592	1
ENSG00000010017.13	RANBP9	chr6	13621498	13711835	protein_coding	-	90337	1256.07	-0.406771	0.000401089	0.0107158
ENSG00000010030.14	ETV7	chr6	36354091	36387800	protein_coding	-	33709	0.216349	-0.115644	0.976924	1
ENSG00000010072.16	SPRTN	chr1	231337104	231355023	protein_coding	+	17919	469.471	0.253809	0.0035299	0.0552433
ENSG00000010165.20	METTL13	chr1	171781660	171814023	protein_coding	+	32363	895.11	-0.25866	0.0214749	0.200007
ENSG00000010219.14	DYRK4	chr12	4562208	4615302	protein_coding	+	53094	235.443	0.601447	0.00272363	0.0453009
ENSG00000010244.19	ZNF207	chr17	32350132	32381885	protein_coding	+	31753	3210.11	-0.0597841	0.651385	1
ENSG00000010256.11	UQCRC1	chr3	48599002	48610976	protein_coding	-	11974	1546.95	-0.319744	0.000453805	0.0118205
ENSG00000010270.14	STARD3NL	chr7	38178245	38230670	protein_coding	+	52425	402.698	-0.230541	0.0362457	0.287081
ENSG00000010278.15	CD9	chr12	6199715	6238271	protein_coding	+	38556	341.404	-0.554419	0.635682	1
ENSG00000010282.15	HHATL	chr3	42692663	42702824	protein_coding	-	10161	0.393019	-0.551676	0.842467	1
ENSG00000010292.13	NCAPD2	chr12	6493356	6531955	protein_coding	+	38599	1490.41	0.4423	0.004059	0.0611984
ENSG00000010295.20	IFFO1	chr12	6538961	6556073	protein_coding	-	17112	1362.69	0.602062	0.0379857	0.295511
ENSG00000010310.9	GIPR	chr19	45668221	45683722	protein_coding	+	15501	40.4818	0.119728	0.919042	1
ENSG00000010318.22	PHF7	chr3	52410660	52423641	protein_coding	+	12981	225.463	0.142399	0.380814	1
ENSG00000010319.7	SEMA3G	chr3	52433035	52445103	protein_coding	-	12068	1.10698	1.96745	0.115296	0.59343
ENSG00000010322.16	NISCH	chr3	52455118	52493068	protein_coding	+	37950	3898.32	0.304933	0.0184312	0.180806
ENSG00000010327.10	STAB1	chr3	52495338	52524495	protein_coding	+	29157	9.92114	-0.135397	0.730486	1
ENSG00000010361.14	FUZ	chr19	49806866	49817376	protein_coding	-	10510	476.922	0.349488	0.00291288	0.0477422
ENSG00000010379.16	SLC6A13	chr12	220621	262873	protein_coding	-	42252	1.73907	0.239054	0.821535	1
ENSG00000010404.18	IDS	chrX	149476988	149521096	protein_coding	-	44108	529.671	0.180193	0.275041	0.963068
ENSG00000010438.17	PRSS3	chr9	33750679	33799231	protein_coding	+	48552	0.615084	-0.115645	0.954328	1
ENSG00000010539.12	ZNF200	chr16	3222325	3236221	protein_coding	-	13896	345.625	0.217308	0.1777	0.762717
ENSG00000010610.10	CD4	chr12	6786858	6820799	protein_coding	+	33941	1.96346	-2.82762	0.429923	1
ENSG00000010626.15	LRRC23	chr12	6873569	6914241	protein_coding	+	40672	113.963	0.348814	0.178027	0.763305
ENSG00000010671.17	BTK	chrX	101349447	101390796	protein_coding	-	41349	3794.36	0.177674	0.161356	0.721573
ENSG00000010704.19	HFE	chr6	26087281	26098343	protein_coding	+	11062	76.6672	0.944465	0.0160805	0.16418
ENSG00000010803.16	SCMH1	chr1	41027200	41242154	protein_coding	-	214954	715.64	-0.0851512	0.618114	1
ENSG00000010810.17	FYN	chr6	111660332	111873452	protein_coding	-	213120	462.028	-0.494661	0.456009	1
ENSG00000010818.10	HIVEP2	chr6	142751469	142956698	protein_coding	-	205229	3411.77	-0.504229	0.00413051	0.0618283
ENSG00000010932.17	FMO1	chr1	171248471	171285978	protein_coding	+	37507	25.6997	0.117589	0.845315	1
ENSG00000011007.13	ELOA	chr1	23743448	23762059	protein_coding	+	18611	1063.45	-0.214712	0.0883607	0.506623
ENSG00000011009.11	LYPLA2	chr1	23791145	23795539	protein_coding	+	4394	998.165	-0.391208	0.000116345	0.00417936
ENSG00000011021.23	CLCN6	chr1	11806096	11848079	protein_coding	+	41983	2020.59	0.131574	0.417443	1
ENSG00000011028.14	MRC2	chr17	62627670	62693597	protein_coding	+	65927	511.304	-0.311028	0.680537	1
ENSG00000011052.21	NME1-NME2	chr17	51153590	51171744	protein_coding	+	18154	0	NA	NA	NA
ENSG00000011083.9	SLC6A7	chr5	150190062	150222788	protein_coding	+	32726	0.272237	0.0719655	0.976699	1
ENSG00000011105.14	TSPAN9	chr12	3077355	3286564	protein_coding	+	209209	2.22303	-1.52865	0.59267	1
ENSG00000011114.15	BTBD7	chr14	93237550	93333092	protein_coding	-	95542	0.129303	0	1	1
ENSG00000011132.12	APBA3	chr19	3750772	3761692	protein_coding	-	10920	681.974	-0.139906	0.353844	1
ENSG00000011143.19	MKS1	chr17	58205441	58219605	protein_coding	-	14164	294.418	0.0836104	0.568748	1
ENSG00000011198.10	ABHD5	chr3	43690108	43734371	protein_coding	+	44263	103.702	0.00687068	0.975171	1
ENSG00000011201.12	ANOS1	chrX	8528874	8732137	protein_coding	-	203263	0	NA	NA	NA
ENSG00000011243.19	AKAP8L	chr19	15380050	15419141	protein_coding	-	39091	2432.23	0.25157	0.0671209	0.428827
ENSG00000011258.16	MBTD1	chr17	51177425	51260163	protein_coding	-	82738	842.837	0.313816	0.0047333	0.0682718
ENSG00000011260.14	UTP18	chr17	51260546	51297936	protein_coding	+	37390	754.706	-0.153869	0.16011	0.718085
ENSG00000011275.19	RNF216	chr7	5620047	5781696	protein_coding	-	161649	2693.59	0.283048	0.192936	0.797076
ENSG00000011295.16	TTC19	chr17	15999784	16045015	protein_coding	+	45231	604.704	-0.370559	0.000142753	0.00490765
ENSG00000011304.22	PTBP1	chr19	797075	812327	protein_coding	+	15252	6927.63	-0.332546	0.000136843	0.0047675
ENSG00000011332.22	DPF1	chr19	38211006	38229714	protein_coding	-	18708	8.64321	-1.02605	0.0578673	0.391472
ENSG00000011347.10	SYT7	chr11	61513714	61581148	protein_coding	-	67434	0.592391	0.316384	0.863871	1
ENSG00000011376.12	LARS2	chr3	45388561	45554726	protein_coding	+	166165	412.867	-0.515049	0.00168502	0.0315878
ENSG00000011405.14	PIK3C2A	chr11	17077730	17207986	protein_coding	-	130256	1118.52	0.104341	0.406878	1
ENSG00000011422.12	PLAUR	chr19	43646095	43670547	protein_coding	-	24452	1.62135	-0.00870951	0.996211	1
ENSG00000011426.11	ANLN	chr7	36389821	36453791	protein_coding	+	63970	0.607973	1.68141	0.492162	1
ENSG00000011451.21	WIZ	chr19	15419978	15449956	protein_coding	-	29978	713.257	-0.551519	1.79121e-06	0.000167817
ENSG00000011454.18	RABGAP1	chr9	122940833	123104866	protein_coding	+	164033	1350.73	0.0072958	0.934389	1
ENSG00000011465.18	DCN	chr12	91140484	91183217	protein_coding	-	42733	0.150771	0.245026	0.953546	1
ENSG00000011478.13	QPCTL	chr19	45692403	45703989	protein_coding	+	11586	248.04	0.16013	0.495955	1
ENSG00000011485.15	PPP5C	chr19	46347087	46392981	protein_coding	+	45894	519.208	-0.412443	0.00139564	0.0276588
ENSG00000011523.14	CEP68	chr2	65056366	65087004	protein_coding	+	30638	994.872	0.0886278	0.755632	1
ENSG00000011566.15	MAP4K3	chr2	39249266	39437301	protein_coding	-	188035	150.046	0.0599193	0.860354	1
ENSG00000011590.14	ZBTB32	chr19	35704558	35717038	protein_coding	+	12480	1307.1	-0.570658	0.0657837	0.423799
ENSG00000011600.12	TYROBP	chr19	35904401	35908295	protein_coding	-	3894	94.3358	1.27716	0.114406	0.590307
ENSG00000011638.11	LDAF1	chr16	21158377	21180616	protein_coding	+	22239	155.916	0.310857	0.18407	0.777272
ENSG00000011677.13	GABRA3	chrX	152166234	152451315	protein_coding	-	285081	0	NA	NA	NA
ENSG00000012048.23	BRCA1	chr17	43044295	43170245	protein_coding	-	125950	119.478	-0.0259264	0.875912	1
ENSG00000012061.16	ERCC1	chr19	45407334	45478828	protein_coding	-	71494	1225.76	-0.0264613	0.868018	1
ENSG00000012124.17	CD22	chr19	35319261	35347361	protein_coding	+	28100	3714.76	-0.0847222	0.836717	1
ENSG00000012171.20	SEMA3B	chr3	50267558	50277546	protein_coding	+	9988	7.7114	0.222362	0.675367	1
ENSG00000012174.12	MBTPS2	chrX	21839617	21885423	protein_coding	+	45806	214.629	-0.359724	0.036373	0.287487
ENSG00000012211.13	PRICKLE3	chrX	49174802	49186528	protein_coding	-	11726	1020.9	0.173827	0.266195	0.948141
ENSG00000012223.13	LTF	chr3	46435645	46485234	protein_coding	-	49589	0.129195	0	1	1
ENSG00000012232.9	EXTL3	chr8	28600469	28755599	protein_coding	+	155130	937.793	-0.250383	0.00988401	0.116706
ENSG00000012504.15	NR1H4	chr12	100473708	100564414	protein_coding	+	90706	0	NA	NA	NA
ENSG00000012660.14	ELOVL5	chr6	53267398	53349179	protein_coding	-	81781	4819.19	0.34321	0.20625	0.828346
ENSG00000012779.12	ALOX5	chr10	45374176	45446119	protein_coding	+	71943	1.95057	1.11699	0.244504	0.908564
ENSG00000012817.16	KDM5D	chrY	19703865	19744939	protein_coding	-	41074	2067.3	0.231204	0.906015	1
ENSG00000012822.16	CALCOCO1	chr12	53708517	53727745	protein_coding	-	19228	2818.04	0.632771	0.00670565	0.0881611
ENSG00000012963.15	UBR7	chr14	93207241	93229215	protein_coding	+	21974	0.0618729	0.605697	0.885497	1
ENSG00000012983.12	MAP4K5	chr14	50418501	50561126	protein_coding	-	142625	1003.72	0.213999	0.103634	0.556903
ENSG00000013016.16	EHD3	chr2	31234152	31269451	protein_coding	+	35299	1560.93	0.626368	0.0668455	0.427922
ENSG00000013275.8	PSMC4	chr19	39971165	39981764	protein_coding	+	10599	0.552554	-1.14604	0.502553	1
ENSG00000013288.9	MAN2B2	chr4	6575189	6623362	protein_coding	+	48173	2019.37	0.354877	0.000941784	0.0205219
ENSG00000013293.6	SLC7A14	chr3	170459548	170586075	protein_coding	-	126527	0.0968966	0	1	1
ENSG00000013297.12	CLDN11	chr3	170418868	170454733	protein_coding	+	35865	1.7716	0.209644	0.789113	1
ENSG00000013306.16	SLC25A39	chr17	44319625	44324870	protein_coding	-	5245	1647.16	-0.225953	0.080895	0.479765
ENSG00000013364.19	MVP	chr16	29820394	29848039	protein_coding	+	27645	2057.28	-0.051986	0.681687	1
ENSG00000013374.17	NUB1	chr7	151341772	151378449	protein_coding	+	36677	1478.57	0.476455	0.000338728	0.00937485
ENSG00000013375.16	PGM3	chr6	83161150	83193936	protein_coding	-	32786	644.128	0.424373	0.00258421	0.0435567
ENSG00000013392.8	RWDD2A	chr6	83193357	83198935	protein_coding	+	5578	129.769	0.24869	0.256069	0.929705
ENSG00000013441.17	CLK1	chr2	200853009	200864691	protein_coding	-	11682	5432.29	0.666848	0.0120616	0.134212
ENSG00000013503.10	POLR3B	chr12	106357748	106510198	protein_coding	+	152450	280.456	-0.938258	4.94107e-07	5.95764e-05
ENSG00000013523.11	ANGEL1	chr14	76786009	76826246	protein_coding	-	40237	1016.03	-0.00145732	0.989873	1
ENSG00000013561.18	RNF14	chr5	141958328	141990292	protein_coding	+	31964	665.341	-0.0500043	0.644509	1
ENSG00000013563.14	DNASE1L1	chrX	154401236	154412112	protein_coding	-	10876	860.264	0.465561	0.00298213	0.0484761
ENSG00000013573.17	DDX11	chr12	31073860	31104799	protein_coding	+	30939	1648.41	0.406955	0.214063	0.844599
ENSG00000013583.10	HEBP1	chr12	12974870	13000265	protein_coding	-	25395	96.1745	0.288932	0.116899	0.597798
ENSG00000013588.9	GPRC5A	chr12	12891559	12917937	protein_coding	+	26378	0.322989	0	1	1
ENSG00000013619.15	MAMLD1	chrX	150361422	150514178	protein_coding	+	152756	1.66741	0.917323	0.577936	1
ENSG00000013725.14	CD6	chr11	60971680	61020377	protein_coding	+	48697	2060.8	0.768804	0.030711	0.256994
ENSG00000013810.21	TACC3	chr4	1712858	1745171	protein_coding	+	32313	948.79	0.692601	2.87886e-06	0.000242418
ENSG00000014123.10	UFL1	chr6	96521595	96555276	protein_coding	+	33681	1231.23	-0.108416	0.197958	0.809717
ENSG00000014138.9	POLA2	chr11	65261920	65305589	protein_coding	+	43669	117.176	0.0331007	0.818671	1
ENSG00000014164.7	ZC3H3	chr8	143437659	143541447	protein_coding	-	103788	355.008	0.095165	0.440691	1
ENSG00000014216.16	CAPN1	chr11	65180566	65212006	protein_coding	+	31440	2926.65	0.0733646	0.518149	1
ENSG00000014257.16	ACP3	chr3	132317369	132368298	protein_coding	+	50929	2.2598	-1.34002	0.32311	1
ENSG00000014641.21	MDH1	chr2	63588609	63607197	protein_coding	+	18588	1553.19	-0.53183	0.0429694	0.322062
ENSG00000014824.14	SLC30A9	chr4	41990502	42090461	protein_coding	+	99959	817.477	-0.229769	0.010182	0.119176
ENSG00000014914.21	MTMR11	chr1	149928651	149936879	protein_coding	-	8228	0.680839	0.218618	0.900535	1
ENSG00000014919.13	COX15	chr10	99710868	99732127	protein_coding	-	21259	489.346	-0.176036	0.109969	0.576065
ENSG00000015133.20	CCDC88C	chr14	91271323	91417844	protein_coding	-	146521	3395.04	0.140027	0.344155	1
ENSG00000015153.15	YAF2	chr12	42157104	42238349	protein_coding	-	81245	379.285	-0.284562	0.0677294	0.431787
ENSG00000015171.20	ZMYND11	chr10	134465	254637	protein_coding	+	120172	1711.5	-0.0887265	0.275458	0.963549
ENSG00000015285.11	WAS	chrX	48676596	48691427	protein_coding	+	14831	1962.63	0.250022	0.0163297	0.166043
ENSG00000015413.10	DPEP1	chr16	89613308	89638456	protein_coding	+	25148	0.532874	1.57035	0.661477	1
ENSG00000015475.19	BID	chr22	17734138	17774770	protein_coding	-	40632	96.0566	0.105732	0.630308	1
ENSG00000015479.20	MATR3	chr5	139293674	139331677	protein_coding	+	38003	112.36	0.549518	0.0319561	0.26349
ENSG00000015520.15	NPC1L1	chr7	44512535	44541330	protein_coding	-	28795	4.18844	1.11015	0.177939	0.763204
ENSG00000015532.10	XYLT2	chr17	50346126	50363138	protein_coding	+	17012	547.077	0.425932	2.45705e-05	0.00131882
ENSG00000015568.13	RGPD5	chr2	109792758	109857705	protein_coding	+	64947	1.00329	0.952844	0.552795	1
ENSG00000015592.17	STMN4	chr8	27235308	27258420	protein_coding	-	23112	0.498166	1.73149	0.414786	1
ENSG00000015676.18	NUDCD3	chr7	44379119	44490658	protein_coding	-	111539	1543.04	-0.24876	0.00762477	0.096582
ENSG00000016082.15	ISL1	chr5	51383448	51394730	protein_coding	+	11282	0	NA	NA	NA
ENSG00000016391.11	CHDH	chr3	53812335	53846419	protein_coding	-	34084	595.469	0.169061	0.659086	1
ENSG00000016402.14	IL20RA	chr6	136999971	137045180	protein_coding	-	45209	0.0968966	0	1	1
ENSG00000016490.16	CLCA1	chr1	86468368	86500259	protein_coding	+	31891	0.129195	0	1	1
ENSG00000016602.9	CLCA4	chr1	86547078	86580754	protein_coding	+	33676	0.659698	-0.487679	0.776429	1
ENSG00000016864.19	GLT8D1	chr3	52694486	52706032	protein_coding	-	11546	582.332	0.0245862	0.819891	1
ENSG00000017260.20	ATP2C1	chr3	130850595	131016712	protein_coding	+	166117	1472.1	-0.0997516	0.120752	0.609785
ENSG00000017427.17	IGF1	chr12	102395874	102481744	protein_coding	-	85870	0.375713	-1.16083	0.627677	1
ENSG00000017483.16	SLC38A5	chrX	48458537	48470260	protein_coding	-	11723	392.52	-0.714179	9.13835e-05	0.0034843
ENSG00000017797.13	RALBP1	chr18	9475009	9538114	protein_coding	+	63105	1472.42	-0.0048843	0.962881	1
ENSG00000018189.13	RUFY3	chr4	70704204	70808619	protein_coding	+	104415	858.638	0.289697	0.122323	0.61454
ENSG00000018236.15	CNTN1	chr12	40692439	41072415	protein_coding	+	379976	0.0968966	0	1	1
ENSG00000018280.17	SLC11A1	chr2	218382029	218396894	protein_coding	+	14865	3.5359	0.924523	0.204351	0.8241
ENSG00000018408.15	WWTR1	chr3	149517235	149736714	protein_coding	-	219479	5.95289	-0.452013	0.572976	1
ENSG00000018510.18	AGPS	chr2	177392746	177567024	protein_coding	+	174278	603.143	-0.340798	0.0358592	0.284996
ENSG00000018607.8	ZNF806	chr2	132304806	132326855	transcribed_unprocessed_pseudogene	+	22049	0.199035	0.605697	0.885497	1
ENSG00000018610.15	STEEP1	chrX	119538149	119565409	protein_coding	-	27260	449.715	-0.368684	0.00580968	0.0798121
ENSG00000018625.15	ATP1A2	chr1	160115759	160143591	protein_coding	+	27832	0.339166	0.245028	0.929399	1
ENSG00000018699.13	TTC27	chr2	32628032	32821051	protein_coding	+	193019	469.106	-0.827393	4.02481e-06	0.000317692
ENSG00000018869.18	ZNF582	chr19	56375846	56393538	protein_coding	-	17692	125.377	0.151492	0.596006	1
ENSG00000019102.12	VSIG2	chr11	124747474	124752255	protein_coding	-	4781	0.240605	-1.69145	0.666997	1
ENSG00000019144.20	PHLDB1	chr11	118606440	118658031	protein_coding	+	51591	81.0364	0.0132768	0.970742	1
ENSG00000019169.11	MARCO	chr2	118942194	118994660	protein_coding	+	52466	0.387586	0	1	1
ENSG00000019186.10	CYP24A1	chr20	54153446	54173986	protein_coding	-	20540	0.0645977	0	1	1
ENSG00000019485.14	PRDM11	chr11	45095806	45235110	protein_coding	+	139304	815.95	0.0571664	0.652983	1
ENSG00000019505.8	SYT13	chr11	45240302	45286341	protein_coding	-	46039	0.341116	-0.836985	0.842268	1
ENSG00000019549.13	SNAI2	chr8	48917598	48921740	protein_coding	-	4142	0.161494	0	1	1
ENSG00000019582.17	CD74	chr5	150401637	150412969	protein_coding	-	11332	109027	-0.284033	0.0586517	0.394917
ENSG00000019991.18	HGF	chr7	81699010	81770438	protein_coding	-	71428	0.0645977	0	1	1
ENSG00000019995.6	ZRANB1	chr10	124942123	124988189	protein_coding	+	46066	1071.55	0.183406	0.090577	0.514251
ENSG00000020129.16	NCDN	chr1	35557473	35567274	protein_coding	+	9801	677.866	0.0304282	0.776516	1
ENSG00000020181.18	ADGRA2	chr8	37784191	37844896	protein_coding	+	60705	145.343	-0.283278	0.111023	0.579176
ENSG00000020219.9	CCT8L1P	chr7	152445477	152447150	processed_pseudogene	+	1673	0.368156	-0.836987	0.820644	1
ENSG00000020256.20	ZFP64	chr20	52051663	52204308	protein_coding	-	152645	883.965	0.128195	0.360941	1
ENSG00000020426.11	MNAT1	chr14	60734742	60969965	protein_coding	+	235223	66.3176	-0.655589	0.00298557	0.0484942
ENSG00000020577.14	SAMD4A	chr14	54566117	54793315	protein_coding	+	227198	11.4594	0.582431	0.505159	1
ENSG00000020633.19	RUNX3	chr1	24899511	24965121	protein_coding	-	65610	3365.61	-0.607631	0.0018947	0.0344626
ENSG00000020922.13	MRE11	chr11	94415570	94493885	protein_coding	-	78315	993.037	0.232637	0.208804	0.834132
ENSG00000021300.14	PLEKHB1	chr11	73646178	73662819	protein_coding	+	16641	450.666	0.906597	6.63827e-05	0.00274765
ENSG00000021355.13	SERPINB1	chr6	2832332	2841959	protein_coding	-	9627	1411.81	-0.110507	0.529818	1
ENSG00000021461.18	CYP3A43	chr7	99828013	99866093	protein_coding	+	38080	0.327969	-1.17659	0.677779	1
ENSG00000021488.13	SLC7A9	chr19	32830509	32869767	protein_coding	-	39258	4.93575	0.843209	0.119636	0.606904
ENSG00000021574.13	SPAST	chr2	32063556	32157637	protein_coding	+	94081	744.276	0.160234	0.284884	0.978027
ENSG00000021645.20	NRXN3	chr14	78170373	79868291	protein_coding	+	1697918	0.322989	0	1	1
ENSG00000021762.20	OSBPL5	chr11	3087107	3166739	protein_coding	-	79632	0.556897	1.99687	0.39651	1
ENSG00000021776.11	AQR	chr15	34851782	34969742	protein_coding	-	117960	1513.88	-0.250759	0.0207873	0.195227
ENSG00000021826.18	CPS1	chr2	210477682	210679107	protein_coding	+	201425	1.09402	-0.508256	0.727815	1
ENSG00000021852.13	C8B	chr1	56929207	56966140	protein_coding	-	36933	0.0322989	0	1	1
ENSG00000022267.19	FHL1	chrX	136146702	136211359	protein_coding	+	64657	15.9766	-0.137193	0.83793	1
ENSG00000022277.13	RTF2	chr20	56468585	56519449	protein_coding	+	50864	901.864	-0.179982	0.0745233	0.45723
ENSG00000022355.18	GABRA1	chr5	161847063	161899981	protein_coding	+	52918	0	NA	NA	NA
ENSG00000022556.16	NLRP2	chr19	54953130	55001142	protein_coding	+	48012	0	NA	NA	NA
ENSG00000022567.10	SLC45A4	chr8	141207166	141308305	protein_coding	-	101139	335.2	-0.127723	0.376544	1
ENSG00000022840.17	RNF10	chr12	120533480	120577588	protein_coding	+	44108	2782.92	-0.100396	0.450397	1
ENSG00000022976.16	ZNF839	chr14	102317377	102342702	protein_coding	+	25325	381.117	-0.108913	0.275679	0.963829
ENSG00000023041.12	ZDHHC6	chr10	112424428	112447572	protein_coding	-	23144	1451.41	0.231565	0.0698787	0.44059
ENSG00000023171.20	GRAMD1B	chr11	123358428	123627774	protein_coding	+	269346	945.623	-0.258475	0.585026	1
ENSG00000023191.17	RNH1	chr11	494512	507300	protein_coding	-	12788	0.756664	-1.09646	0.35445	1
ENSG00000023228.14	NDUFS1	chr2	206114817	206159509	protein_coding	-	44692	0.419979	-1.44027	0.456894	1
ENSG00000023287.13	RB1CC1	chr8	52622458	52745843	protein_coding	-	123385	1513.43	0.379152	4.74459e-05	0.00218324
ENSG00000023318.9	ERP44	chr9	99979185	100099052	protein_coding	-	119867	883.262	-0.14406	0.119873	0.607592
ENSG00000023330.15	ALAS1	chr3	52198086	52214327	protein_coding	+	16241	633.114	-0.509024	2.59945e-06	0.000225274
ENSG00000023445.16	BIRC3	chr11	102317450	102339403	protein_coding	+	21953	3904.92	0.110647	0.708193	1
ENSG00000023516.9	AKAP11	chr13	42272152	42323261	protein_coding	+	51109	3796.42	-0.165895	0.281183	0.972441
ENSG00000023572.10	GLRX2	chr1	193090866	193106114	protein_coding	-	15248	404.699	-0.173478	0.112948	0.586055
ENSG00000023608.5	SNAPC1	chr14	61762420	61796428	protein_coding	+	34008	97.8356	-0.183492	0.27909	0.969137
ENSG00000023697.13	DERA	chr12	15911302	16037381	protein_coding	+	126079	473.038	-0.263443	0.191757	0.794651
ENSG00000023734.11	STRAP	chr12	15882387	15903478	protein_coding	+	21091	1427.93	-0.675552	0.000705501	0.0164677
ENSG00000023839.12	ABCC2	chr10	99782640	99852594	protein_coding	+	69954	169.902	0.958834	0.00270875	0.0450895
ENSG00000023892.11	DEF6	chr6	35297818	35321771	protein_coding	+	23953	1786.5	0.310883	0.0248045	0.221182
ENSG00000023902.14	PLEKHO1	chr1	150149183	150164720	protein_coding	+	15537	1981.47	-0.0833002	0.672321	1
ENSG00000023909.10	GCLM	chr1	93885199	93909456	protein_coding	-	24257	283.734	-0.43805	0.0109721	0.125943
ENSG00000024048.11	UBR2	chr6	42564029	42693505	protein_coding	+	129476	1996.76	0.0767484	0.474466	1
ENSG00000024422.12	EHD2	chr19	47713422	47743134	protein_coding	+	29712	0.20192	-0.115644	0.978065	1
ENSG00000024526.17	DEPDC1	chr1	68474152	68497221	protein_coding	-	23069	0	NA	NA	NA
ENSG00000024862.18	CCDC28A	chr6	138773769	138793319	protein_coding	+	19550	449.299	0.54708	8.22116e-06	0.000557886
ENSG00000025039.15	RRAGD	chr6	89364616	89412273	protein_coding	-	47657	34.1116	-2.04214	0.00222186	0.0388995
ENSG00000025156.13	HSF2	chr6	122399551	122433119	protein_coding	+	33568	313.986	0.0923895	0.438397	1
ENSG00000025293.17	PHF20	chr20	35771974	35950370	protein_coding	+	178396	1200.77	0.0408883	0.793782	1
ENSG00000025423.11	HSD17B6	chr12	56752161	56787790	protein_coding	+	35629	72.2666	0.336187	0.0862645	0.499265
ENSG00000025434.19	NR1H3	chr11	47248300	47269033	protein_coding	+	20733	122.076	-0.00460941	0.975342	1
ENSG00000025708.14	TYMP	chr22	50525752	50530032	protein_coding	-	4280	164.994	-0.665313	0.0691405	0.43803
ENSG00000025770.19	NCAPH2	chr22	50508224	50524780	protein_coding	+	16556	1265.05	-0.111174	0.30336	1
ENSG00000025772.8	TOMM34	chr20	44942130	44960397	protein_coding	-	18267	473.482	-0.47568	0.000273117	0.00806898
ENSG00000025796.14	SEC63	chr6	107867756	107958208	protein_coding	-	90452	1467.98	0.0678061	0.545129	1
ENSG00000025800.14	KPNA6	chr1	32108056	32176563	protein_coding	+	68507	1432.26	-0.145522	0.259146	0.934541
ENSG00000026025.16	VIM	chr10	17228241	17237593	protein_coding	+	9352	6905.23	-0.199798	0.241289	0.902588
ENSG00000026036.22	RTEL1-TNFRSF6B	chr20	63659300	63698684	protein_coding	+	39384	62.6319	-0.358854	0.0821459	0.483837
ENSG00000026103.23	FAS	chr10	88953813	89029605	protein_coding	+	75792	209.47	-0.176019	0.503024	1
ENSG00000026297.17	RNASET2	chr6	166922113	166957191	protein_coding	-	35078	2540.97	0.87569	1.23217e-05	0.000773088
ENSG00000026508.21	CD44	chr11	35138882	35232402	protein_coding	+	93520	4233.31	0.170276	0.384538	1
ENSG00000026559.14	KCNG1	chr20	51003656	51023107	protein_coding	-	19451	389.43	-0.170127	0.881374	1
ENSG00000026652.15	AGPAT4	chr6	161129967	161274061	protein_coding	-	144094	25.2181	0.264238	0.843659	1
ENSG00000026751.17	SLAMF7	chr1	160739057	160754821	protein_coding	+	15764	942.55	-2.27316	5.07905e-05	0.00228162
ENSG00000026950.17	BTN3A1	chr6	26402237	26415208	protein_coding	+	12971	2024.17	0.620483	0.00753106	0.0956863
ENSG00000027001.10	MIPEP	chr13	23730189	23889400	protein_coding	-	159211	210.471	-0.547679	0.00024218	0.00734807
ENSG00000027075.17	PRKCH	chr14	61187559	61550976	protein_coding	+	363417	17.4273	-0.596229	0.76684	1
ENSG00000027644.5	INSRR	chr1	156840063	156859117	protein_coding	-	19054	0.632818	-1.40876	0.599098	1
ENSG00000027697.15	IFNGR1	chr6	137197485	137219449	protein_coding	-	21964	732.197	-0.00563014	0.939985	1
ENSG00000027847.14	B4GALT7	chr5	177600132	177610330	protein_coding	+	10198	464.425	-0.236386	0.0367811	0.289393
ENSG00000027869.12	SH2D2A	chr1	156806243	156816848	protein_coding	-	10605	19.1835	-3.48277	0.000100651	0.00372099
ENSG00000028116.18	VRK2	chr2	57907629	58159920	protein_coding	+	252291	631.675	-0.15429	0.186451	0.783029
ENSG00000028137.19	TNFRSF1B	chr1	12166991	12209228	protein_coding	+	42237	3233.22	-0.124915	0.779176	1
ENSG00000028203.19	VEZT	chr12	95217746	95302799	protein_coding	+	85053	889.804	-0.36802	0.00222776	0.0389534
ENSG00000028277.22	POU2F2	chr19	42086110	42196585	protein_coding	-	110475	6195.15	-0.371429	0.00852117	0.104995
ENSG00000028310.18	BRD9	chr5	850291	892801	protein_coding	-	42510	1214	0.0313728	0.767154	1
ENSG00000028528.15	SNX1	chr15	64094123	64146090	protein_coding	+	51967	2704.09	0.0397436	0.66359	1
ENSG00000028839.10	TBPL1	chr6	133952170	133990432	protein_coding	+	38262	270.618	-0.140526	0.235326	0.890161
ENSG00000029153.15	ARNTL2	chr12	27332836	27425289	protein_coding	+	92453	2.81711	-0.474575	0.671373	1
ENSG00000029363.17	BCLAF1	chr6	136256627	136289851	protein_coding	-	33224	4887.71	-0.0781029	0.549433	1
ENSG00000029364.12	SLC39A9	chr14	69398015	69462390	protein_coding	+	64375	1450.78	-0.298913	0.019836	0.189122
ENSG00000029534.21	ANK1	chr8	41653220	41896762	protein_coding	-	243542	404.89	1.04649	4.00483e-05	0.00189958
ENSG00000029559.7	IBSP	chr4	87799554	87812435	protein_coding	+	12881	0	NA	NA	NA
ENSG00000029639.11	TFB1M	chr6	155256134	155314493	protein_coding	-	58359	205.081	-0.344453	0.0283403	0.242323
ENSG00000029725.17	RABEP1	chr17	5282265	5386340	protein_coding	+	104075	3080.47	-0.178616	0.0502024	0.35676
ENSG00000029993.15	HMGB3	chrX	150980509	150990771	protein_coding	+	10262	37.5317	-0.331679	0.388025	1
ENSG00000030066.13	NUP160	chr11	47778087	47848555	protein_coding	-	70468	1505.17	-0.0109106	0.930788	1
ENSG00000030110.14	BAK1	chr6	33572547	33580293	protein_coding	-	7746	693.349	-0.146804	0.0880143	0.505554
ENSG00000030304.15	MUSK	chr9	110668779	110806558	protein_coding	+	137779	0.226092	0	1	1
ENSG00000030419.17	IKZF2	chr2	212999691	213152427	protein_coding	-	152736	150.465	-0.155661	0.839231	1
ENSG00000030582.18	GRN	chr17	44345246	44353106	protein_coding	+	7860	5054.35	0.553372	0.0810598	0.480194
ENSG00000031003.11	FAM13B	chr5	137937960	138051961	protein_coding	-	114001	2277.18	0.0467169	0.734273	1
ENSG00000031081.11	ARHGAP31	chr3	119294383	119420714	protein_coding	+	126331	299.985	-0.505807	0.0180062	0.177999
ENSG00000031691.7	CENPQ	chr6	49463370	49493107	protein_coding	+	29737	147.378	0.0435943	0.767502	1
ENSG00000031698.13	SARS1	chr1	109213918	109238182	protein_coding	+	24264	2946.11	-0.990293	7.66821e-08	1.37492e-05
ENSG00000031823.14	RANBP3	chr19	5916139	5978142	protein_coding	-	62003	1561.61	-0.102568	0.254984	0.928179
ENSG00000032219.19	ARID4A	chr14	58298504	58373887	protein_coding	+	75383	982.54	0.344254	0.0100059	0.117777
ENSG00000032389.13	EIPR1	chr2	3188925	3377830	protein_coding	-	188905	525.426	-0.369056	0.00756172	0.0959772
ENSG00000032444.17	PNPLA6	chr19	7534004	7561764	protein_coding	+	27760	2670.36	0.14937	0.0783538	0.470666
ENSG00000032742.18	IFT88	chr13	20567138	20691444	protein_coding	+	124306	219.901	0.295517	0.0300288	0.252879
ENSG00000033011.14	ALG1	chr16	5033702	5087379	protein_coding	+	53677	669.902	-0.448147	0.00147167	0.0286604
ENSG00000033030.15	ZCCHC8	chr12	122471599	122501073	protein_coding	-	29474	1305.62	-0.0622188	0.65173	1
ENSG00000033050.9	ABCF2	chr7	151211484	151227205	protein_coding	-	15721	243.632	-0.3249	0.0484025	0.348227
ENSG00000033100.17	CHPF2	chr7	151232483	151240979	protein_coding	+	8496	1760.89	-0.170565	0.119276	0.605742
ENSG00000033122.21	LRRC7	chr1	69567922	70151945	protein_coding	+	584023	23.9437	0.337778	0.30276	1
ENSG00000033170.17	FUT8	chr14	65410592	65744121	protein_coding	+	333529	646.818	0.0193627	0.921004	1
ENSG00000033178.13	UBA6	chr4	67612652	67701155	protein_coding	-	88503	1337.07	-0.054615	0.601879	1
ENSG00000033327.13	GAB2	chr11	78215293	78418348	protein_coding	-	203055	3147.26	0.141441	0.569107	1
ENSG00000033627.17	ATP6V0A1	chr17	42458844	42522582	protein_coding	+	63738	1418.66	-1.10782	1.4677e-08	3.59137e-06
ENSG00000033800.14	PIAS1	chr15	68054309	68198603	protein_coding	+	144294	1628.79	0.188712	0.0855485	0.496671
ENSG00000033867.17	SLC4A7	chr3	27372721	27484420	protein_coding	-	111699	395.099	-0.0531453	0.891765	1
ENSG00000034053.15	APBA2	chr15	28884483	29118315	protein_coding	+	233832	0.0539474	0	1	1
ENSG00000034152.19	MAP2K3	chr17	21284672	21315232	protein_coding	+	30560	1204.68	-0.575162	0.00203128	0.036296
ENSG00000034239.11	EFCAB1	chr8	48710789	48735311	protein_coding	-	24522	0.193793	0	1	1
ENSG00000034510.6	TMSB10	chr2	84905656	84906671	protein_coding	+	1015	9491	0.0782185	0.626033	1
ENSG00000034533.12	ASTE1	chr3	131013875	131027649	protein_coding	-	13774	387.673	0.181762	0.32271	1
ENSG00000034677.13	RNF19A	chr8	100257060	100336218	protein_coding	-	79158	1651.27	0.0266547	0.864541	1
ENSG00000034693.15	PEX3	chr6	143450805	143490616	protein_coding	+	39811	254.296	-0.0815361	0.530708	1
ENSG00000034713.8	GABARAPL2	chr16	75566375	75577881	protein_coding	+	11506	1039.4	0.13568	0.304481	1
ENSG00000034971.17	MYOC	chr1	171635417	171652688	protein_coding	-	17271	0.112585	0	1	1
ENSG00000035115.22	SH3YL1	chr2	217730	266398	protein_coding	-	48668	671.62	0.0297894	0.91879	1
ENSG00000035141.8	FAM136A	chr2	70295975	70302090	protein_coding	-	6115	670.895	-0.0155315	0.925198	1
ENSG00000035403.18	VCL	chr10	73995193	74121363	protein_coding	+	126170	1056.87	0.657629	0.0358525	0.284996
ENSG00000035499.13	DEPDC1B	chr5	60596912	60700190	protein_coding	-	103278	5.579	0.121275	0.793935	1
ENSG00000035664.11	DAPK2	chr15	63907036	64072033	protein_coding	-	164997	147.477	1.96181	1.31662e-05	0.000817445
ENSG00000035681.9	NSMAF	chr8	58583508	58659853	protein_coding	-	76345	1652.51	-0.753062	3.04002e-05	0.00153656
ENSG00000035687.10	ADSS2	chr1	244408494	244451909	protein_coding	-	43415	625.931	-0.302505	0.00685054	0.0896128
ENSG00000035720.8	STAP1	chr4	67558727	67607337	protein_coding	+	48610	1233.98	0.173538	0.451503	1
ENSG00000035862.12	TIMP2	chr17	78852977	78925387	protein_coding	-	72410	1131.23	0.244083	0.284338	0.977487
ENSG00000035928.17	RFC1	chr4	39287456	39366375	protein_coding	-	78919	1418.46	-0.293951	0.0795659	0.47527
ENSG00000036054.13	TBC1D23	chr3	100260992	100325251	protein_coding	+	64259	802.238	-0.0455253	0.500235	1
ENSG00000036257.14	CUL3	chr2	224470150	224585397	protein_coding	-	115247	2492.86	-0.116551	0.2166	0.850575
ENSG00000036448.10	MYOM2	chr8	2045046	2165552	protein_coding	+	120506	3.2711	0.186861	0.947344	1
ENSG00000036473.8	OTC	chrX	38352586	38421446	protein_coding	+	68860	0	NA	NA	NA
ENSG00000036530.9	CYP46A1	chr14	99684298	99727301	protein_coding	+	43003	2.69195	1.63994	0.367801	1
ENSG00000036549.13	ZZZ3	chr1	77562416	77683419	protein_coding	-	121003	1144.95	-0.231565	0.0309194	0.258011
ENSG00000036565.15	SLC18A1	chr8	20144855	20183206	protein_coding	-	38351	0.122886	0.245026	0.953546	1
ENSG00000036672.16	USP2	chr11	119355215	119381711	protein_coding	-	26496	1.52075	1.08862	0.369186	1
ENSG00000036828.17	CASR	chr3	122183668	122291629	protein_coding	+	107961	0.397846	-0.115645	0.970614	1
ENSG00000037042.9	TUBG2	chr17	42659284	42667006	protein_coding	+	7722	433.777	0.377554	0.394157	1
ENSG00000037241.7	RPL26L1	chr5	172958729	172969771	protein_coding	+	11042	93.8671	-1.10788	5.38691e-05	0.00238135
ENSG00000037280.16	FLT4	chr5	180601506	180649624	protein_coding	-	48118	0.517206	-1.94525	0.642688	1
ENSG00000037474.15	NSUN2	chr5	6599239	6633291	protein_coding	-	34052	1958.58	-0.114402	0.111464	0.580964
ENSG00000037637.11	FBXO42	chr1	16246840	16352480	protein_coding	-	105640	768.532	-0.206043	0.0888861	0.508525
ENSG00000037749.13	MFAP3	chr5	154038959	154220478	protein_coding	+	181519	607.669	0.140386	0.254125	0.926509
ENSG00000037757.14	MRI1	chr19	13764522	13774282	protein_coding	+	9760	759.689	0.656854	0.0639774	0.417071
ENSG00000037897.17	METTL1	chr12	57768471	57772119	protein_coding	-	3648	98.4536	-3.31224	5.13599e-19	1.52605e-15
ENSG00000037965.6	HOXC8	chr12	54008985	54012769	protein_coding	+	3784	0.161494	0	1	1
ENSG00000038002.9	AGA	chr4	177430774	177442437	protein_coding	-	11663	459.909	-0.420678	0.006826	0.089348
ENSG00000038210.14	PI4K2B	chr4	25160663	25279204	protein_coding	+	118541	584.307	0.0284236	0.741086	1
ENSG00000038219.13	BOD1L1	chr4	13568738	13627725	protein_coding	-	58987	2718.84	0.133425	0.23473	0.888955
ENSG00000038274.17	MAT2B	chr5	163503114	163519354	protein_coding	+	16240	3915.64	0.11752	0.286881	0.981081
ENSG00000038295.8	TLL1	chr4	165873237	166104457	protein_coding	+	231220	0.226092	0	1	1
ENSG00000038358.15	EDC4	chr16	67873052	67884499	protein_coding	+	11447	1690.79	0.0718622	0.496484	1
ENSG00000038382.21	TRIO	chr5	14143342	14532128	protein_coding	+	388786	1561.69	0.0323032	0.946052	1
ENSG00000038427.16	VCAN	chr5	83471618	83582303	protein_coding	+	110685	0.0342513	0	1	1
ENSG00000038532.16	CLEC16A	chr16	10944564	11182186	protein_coding	+	237622	1210.19	-0.215797	0.104283	0.559278
ENSG00000038945.15	MSR1	chr8	16107878	16567490	protein_coding	-	459612	49.2378	0.161506	0.915072	1
ENSG00000039068.20	CDH1	chr16	68737292	68835537	protein_coding	+	98245	0.292715	0	1	1
ENSG00000039123.16	MTREX	chr5	55307989	55425579	protein_coding	+	117590	1438.83	-0.545524	0.000154705	0.00523631
ENSG00000039139.11	DNAH5	chr5	13690328	14011818	protein_coding	-	321490	0.71273	-0.476317	0.852883	1
ENSG00000039319.17	ZFYVE16	chr5	80408013	80483379	protein_coding	+	75366	889.653	0.153551	0.148004	0.684837
ENSG00000039523.20	RIPOR1	chr16	67518418	67546788	protein_coding	+	28370	3880.21	0.751909	0.000281362	0.00825394
ENSG00000039537.14	C6	chr5	41142116	41261438	protein_coding	-	119322	0.16194	0.802999	0.848412	1
ENSG00000039560.14	RAI14	chr5	34656328	34832612	protein_coding	+	176284	0.137783	0.245026	0.953546	1
ENSG00000039600.11	SOX30	chr5	157625679	157671480	protein_coding	-	45801	43.0959	0.224444	0.416012	1
ENSG00000039650.12	PNKP	chr19	49859882	49878351	protein_coding	-	18469	1684.57	-0.121998	0.49293	1
ENSG00000039987.7	BEST2	chr19	12751702	12758458	protein_coding	+	6756	1.18225	0.364757	0.732736	1
ENSG00000040199.18	PHLPP2	chr16	71637835	71724701	protein_coding	-	86866	836.045	-0.00802385	0.969873	1
ENSG00000040275.17	SPDL1	chr5	169583636	169604778	protein_coding	+	21142	201.158	-0.0730402	0.63951	1
ENSG00000040341.18	STAU2	chr8	73420369	73747708	protein_coding	-	327339	446.626	0.0190342	0.893391	1
ENSG00000040487.13	SLC66A1	chr1	19312326	19329300	protein_coding	+	16974	376.539	0.0561638	0.689154	1
ENSG00000040531.16	CTNS	chr17	3636459	3663103	protein_coding	+	26644	489.578	-0.265252	0.0968499	0.534886
ENSG00000040608.14	RTN4R	chr22	20241415	20283246	protein_coding	-	41831	1.06098	-1.4617	0.334507	1
ENSG00000040633.13	PHF23	chr17	7235029	7239722	protein_coding	-	4693	813.012	-0.136876	0.100494	0.546666
ENSG00000040731.10	CDH10	chr5	24487100	24644978	protein_coding	-	157878	0	NA	NA	NA
ENSG00000040933.16	INPP4A	chr2	98444854	98594392	protein_coding	+	149538	535.657	0.0159076	0.942351	1
ENSG00000041353.10	RAB27B	chr18	54717860	54895516	protein_coding	+	177656	25.5976	-1.11724	0.31246	1
ENSG00000041357.16	PSMA4	chr15	78540405	78552417	protein_coding	+	12012	1467.02	-0.498259	1.82114e-05	0.00105509
ENSG00000041515.16	MYO16	chr13	108596152	109208005	protein_coding	+	611853	0.236599	-0.115645	0.97227	1
ENSG00000041802.11	LSG1	chr3	194640791	194672463	protein_coding	-	31672	1235.8	-0.285303	0.041778	0.316151
ENSG00000041880.15	PARP3	chr3	51942345	51948867	protein_coding	+	6522	767.056	-0.0154659	0.922815	1
ENSG00000041982.16	TNC	chr9	115019575	115118257	protein_coding	-	98682	0.485422	-0.46946	0.877642	1
ENSG00000041988.16	THAP3	chr1	6624868	6635586	protein_coding	+	10718	612.677	-0.00719148	0.93997	1
ENSG00000042062.13	RIPOR3	chr20	50586108	50691542	protein_coding	-	105434	22.8096	0.590051	0.112089	0.583345
ENSG00000042088.14	TDP1	chr14	89954939	90044764	protein_coding	+	89825	650.319	-0.124623	0.300886	1
ENSG00000042286.15	AIFM2	chr10	70098223	70132934	protein_coding	-	34711	332.057	-0.326941	0.0276445	0.237938
ENSG00000042304.13	C2orf83	chr2	227610090	227648606	transcribed_unprocessed_pseudogene	-	38516	0.0968966	0	1	1
ENSG00000042317.17	SPATA7	chr14	88384924	88470350	protein_coding	+	85426	12.5455	0.220493	0.749197	1
ENSG00000042429.12	MED17	chr11	93784227	93814963	protein_coding	+	30736	163.944	0.298022	0.145219	0.676765
ENSG00000042445.14	RETSAT	chr2	85341955	85354531	protein_coding	-	12576	646.706	0.0281598	0.776268	1
ENSG00000042493.16	CAPG	chr2	85394753	85418432	protein_coding	-	23679	1215.01	-0.0056346	0.985632	1
ENSG00000042753.12	AP2S1	chr19	46838136	46850846	protein_coding	-	12710	654.116	-0.180403	0.245443	0.910708
ENSG00000042781.14	USH2A	chr1	215622891	216423448	protein_coding	-	800557	0.47321	0	1	1
ENSG00000042813.8	ZPBP	chr7	49850421	50121329	protein_coding	-	270908	0.686505	-2.20533	0.220247	0.858975
ENSG00000042832.12	TG	chr8	132866958	133134903	protein_coding	+	267945	18.6384	0.351924	0.500256	1
ENSG00000042980.13	ADAM28	chr8	24294069	24359014	protein_coding	+	64945	6795.93	0.464753	0.143945	0.673367
ENSG00000043039.7	BARX2	chr11	129375848	129452279	protein_coding	+	76431	1.5785	-1.57214	0.460715	1
ENSG00000043093.15	DCUN1D1	chr3	182938074	182985953	protein_coding	-	47879	588.955	-0.0146356	0.906777	1
ENSG00000043143.22	JADE2	chr5	134524312	134583230	protein_coding	+	58918	6301.73	-0.16652	0.194696	0.8014
ENSG00000043355.12	ZIC2	chr13	99981784	99986765	protein_coding	+	4981	0	NA	NA	NA
ENSG00000043462.13	LCP2	chr5	170246233	170297815	protein_coding	-	51582	604.005	-0.341399	0.137644	0.656621
ENSG00000043514.17	TRIT1	chr1	39838110	39883511	protein_coding	-	45401	295.592	0.0863467	0.466428	1
ENSG00000043591.6	ADRB1	chr10	114043866	114046904	protein_coding	+	3038	8.62269	-0.603415	0.817349	1
ENSG00000044012.4	GUCA2B	chr1	42153410	42155820	protein_coding	+	2410	0	NA	NA	NA
ENSG00000044090.13	CUL7	chr6	43037617	43053943	protein_coding	-	16326	730.45	-0.107199	0.382927	1
ENSG00000044115.21	CTNNA1	chr5	138610967	138935034	protein_coding	+	324067	2097.39	-0.0269832	0.79572	1
ENSG00000044446.12	PHKA2	chrX	18892298	18984114	protein_coding	-	91816	1486	0.180519	0.226629	0.873433
ENSG00000044459.15	CNTLN	chr9	17134982	17503923	protein_coding	+	368941	13.9192	-0.289345	0.905339	1
ENSG00000044524.11	EPHA3	chr3	89107621	89482134	protein_coding	+	374513	0.161494	0	1	1
ENSG00000044574.9	HSPA5	chr9	125234853	125241382	protein_coding	-	6529	4281.65	-1.26012	1.12402e-05	0.000719341
ENSG00000046604.14	DSG2	chr18	31498177	31549008	protein_coding	+	50831	0.419638	-0.23261	0.948987	1
ENSG00000046647.14	GEMIN8	chrX	14006726	14029893	protein_coding	-	23167	212.161	-0.230694	0.136475	0.653893
ENSG00000046651.16	OFD1	chrX	13734743	13777955	protein_coding	+	43212	1845.67	0.333967	0.113746	0.588726
ENSG00000046653.15	GPM6B	chrX	13770939	13938638	protein_coding	-	167699	99.8851	0.295862	0.27339	0.960758
ENSG00000046774.10	MAGEC2	chrX	142202342	142205290	protein_coding	-	2948	0.161494	0	1	1
ENSG00000046889.19	PREX2	chr8	67952046	68237032	protein_coding	+	284986	0.129195	0	1	1
ENSG00000047056.17	WDR37	chr10	1049538	1132384	protein_coding	+	82846	992.415	0.38266	0.000127701	0.00450177
ENSG00000047188.16	YTHDC2	chr5	113513694	113595285	protein_coding	+	81591	1562.19	-0.0745045	0.545474	1
ENSG00000047230.15	CTPS2	chrX	16587999	16712936	protein_coding	-	124937	396.931	-0.295123	0.148332	0.685613
ENSG00000047249.18	ATP6V1H	chr8	53715543	53843558	protein_coding	-	128015	476.692	-0.23497	0.0545435	0.377082
ENSG00000047315.17	POLR2B	chr4	56977722	57031158	protein_coding	+	53436	2749.93	-0.249894	0.0128304	0.140268
ENSG00000047346.13	FAM214A	chr15	52581317	52709817	protein_coding	-	128500	1699.24	0.951132	3.54344e-09	1.06043e-06
ENSG00000047365.13	ARAP2	chr4	35948221	36244514	protein_coding	-	296293	854.706	0.685938	1.86675e-05	0.00107851
ENSG00000047410.14	TPR	chr1	186311652	186375693	protein_coding	-	64041	3414.32	-0.0663381	0.475084	1
ENSG00000047457.14	CP	chr3	149162410	149221829	protein_coding	-	59419	395.305	0.564312	0.00104551	0.0222471
ENSG00000047578.14	KATNIP	chr16	27550133	27780344	protein_coding	+	230211	562.175	0.14099	0.118054	0.601667
ENSG00000047579.20	DTNBP1	chr6	15522807	15663058	protein_coding	-	140251	551.337	-0.169634	0.144457	0.674804
ENSG00000047597.7	XK	chrX	37685791	37732130	protein_coding	+	46339	1.24982	-3.81142	0.0732109	0.453189
ENSG00000047617.17	ANO2	chr12	5531869	5946232	protein_coding	-	414363	0.385809	0	1	1
ENSG00000047621.12	C12orf4	chr12	4487735	4538508	protein_coding	-	50773	275.792	-0.101062	0.491585	1
ENSG00000047634.15	SCML1	chrX	17737449	17754988	protein_coding	+	17539	0.0857778	-0.476315	0.909837	1
ENSG00000047644.20	WWC3	chrX	10015254	10144474	protein_coding	+	129220	1615.2	-0.584444	0.0137464	0.147529
ENSG00000047648.23	ARHGAP6	chrX	11117651	11665920	protein_coding	-	548269	77.5437	1.15615	0.274918	0.963068
ENSG00000047662.5	FAM184B	chr4	17629306	17781621	protein_coding	-	152315	574.731	0.541696	0.0310084	0.258547
ENSG00000047849.22	MAP4	chr3	47850690	48089272	protein_coding	-	238582	2742.26	-0.413002	0.00146291	0.0286507
ENSG00000047932.14	GOPC	chr6	117560269	117602542	protein_coding	-	42273	887.518	0.156726	0.002283	0.0396031
ENSG00000047936.11	ROS1	chr6	117287353	117425942	protein_coding	-	138589	0.0322989	0	1	1
ENSG00000048028.11	USP28	chr11	113797874	113875570	protein_coding	-	77696	1557.81	0.726077	0.00508802	0.0722359
ENSG00000048052.24	HDAC9	chr7	18086949	19002416	protein_coding	+	915467	2815.88	-1.19955	0.00119677	0.0247781
ENSG00000048140.18	TSPAN17	chr5	176647387	176659054	protein_coding	+	11667	731.588	-0.44618	0.0601541	0.400944
ENSG00000048162.22	NOP16	chr5	176383946	176388927	protein_coding	-	4981	727.243	-0.564124	0.00180289	0.0332432
ENSG00000048342.18	CC2D2A	chr4	15469865	15601552	protein_coding	+	131687	12.6541	-0.584863	0.125601	0.623876
ENSG00000048392.13	RRM2B	chr8	102204502	102238961	protein_coding	-	34459	1563.67	0.434367	0.000454483	0.0118234
ENSG00000048405.11	ZNF800	chr7	127346790	127431924	protein_coding	-	85134	1283.66	0.357652	0.025385	0.224482
ENSG00000048462.11	TNFRSF17	chr16	11965210	11968068	protein_coding	+	2858	170.983	-0.750415	0.141638	0.666724
ENSG00000048471.14	SNX29	chr16	11976734	12574287	protein_coding	+	597553	2409.49	-0.213051	0.387568	1
ENSG00000048540.16	LMO3	chr12	16548372	16610594	protein_coding	-	62222	0.512082	-0.83699	0.729914	1
ENSG00000048544.6	MRPS10	chr6	42206807	42217861	protein_coding	-	11054	650.951	-0.19913	0.0624971	0.411158
ENSG00000048545.17	GUCA1A	chr6	42155406	42181338	protein_coding	+	25932	0.19343	-1.21448	0.722498	1
ENSG00000048649.14	RSF1	chr11	77660009	77820869	protein_coding	-	160860	1302.24	0.133709	0.372244	1
ENSG00000048707.15	VPS13D	chr1	12230030	12512047	protein_coding	+	282017	2429.49	0.472779	0.00267863	0.0447363
ENSG00000048740.19	CELF2	chr10	10798397	11336675	protein_coding	+	538278	3586.64	0.0694278	0.694724	1
ENSG00000048828.17	FAM120A	chr9	93451685	93566112	protein_coding	+	114427	4910.59	-0.263003	0.0135313	0.145823
ENSG00000048991.17	R3HDM1	chr2	135531455	135725270	protein_coding	+	193815	874.73	-0.354152	0.00780475	0.0982931
ENSG00000049089.15	COL9A2	chr1	40300489	40317813	protein_coding	-	17324	2220.19	-0.47835	0.0839121	0.490594
ENSG00000049130.16	KITLG	chr12	88492793	88580851	protein_coding	-	88058	0.0645977	0	1	1
ENSG00000049167.16	ERCC8	chr5	60866454	60945073	protein_coding	-	78619	208.852	-0.17915	0.181067	0.770432
ENSG00000049192.15	ADAMTS6	chr5	65148738	65481920	protein_coding	-	333182	559.078	0.295614	0.31642	1
ENSG00000049239.13	H6PD	chr1	9234774	9271337	protein_coding	+	36563	1882.59	-0.0738736	0.562438	1
ENSG00000049245.13	VAMP3	chr1	7771296	7781432	protein_coding	+	10136	631.142	0.313387	0.0451358	0.332842
ENSG00000049246.15	PER3	chr1	7784291	7845177	protein_coding	+	60886	252.915	0.333592	0.408936	1
ENSG00000049247.14	UTS2	chr1	7843083	7853512	protein_coding	-	10429	81.472	0.307544	0.659196	1
ENSG00000049249.9	TNFRSF9	chr1	7915871	7943165	protein_coding	-	27294	294.209	-3.83634	9.10053e-06	0.000599943
ENSG00000049283.19	EPN3	chr17	50532682	50543750	protein_coding	+	11068	1.90364	1.1583	0.20389	0.823118
ENSG00000049323.16	LTBP1	chr2	32946953	33399509	protein_coding	+	452556	0.338244	-0.476317	0.878531	1
ENSG00000049449.10	RCN1	chr11	32091074	32105722	protein_coding	+	14648	54.236	-2.64391	1.3106e-05	0.000814926
ENSG00000049540.19	ELN	chr7	74027789	74069907	protein_coding	+	42118	0.258391	0	1	1
ENSG00000049541.11	RFC2	chr7	74231499	74254458	protein_coding	-	22959	261.16	-0.0544975	0.672526	1
ENSG00000049618.24	ARID1B	chr6	156776020	157210779	protein_coding	+	434759	3382.47	0.116913	0.414553	1
ENSG00000049656.14	CLPTM1L	chr5	1317752	1345099	protein_coding	-	27347	313.938	-0.0792056	0.491758	1
ENSG00000049759.20	NEDD4L	chr18	58044226	58401540	protein_coding	+	357314	201.303	-0.0467161	0.849332	1
ENSG00000049768.17	FOXP3	chrX	49250438	49270477	protein_coding	-	20039	47.3375	-0.353179	0.0915344	0.517554
ENSG00000049769.14	PPP1R3F	chrX	49269793	49301461	protein_coding	+	31668	142.326	0.139359	0.548218	1
ENSG00000049860.14	HEXB	chr5	74640023	74722647	protein_coding	+	82624	1044.58	0.101924	0.405444	1
ENSG00000049883.15	PTCD2	chr5	72320367	72368395	protein_coding	+	48028	325.997	-0.0300896	0.831551	1
ENSG00000050030.16	NEXMIF	chrX	74732856	74925472	protein_coding	-	192616	26.7693	0.777516	0.626878	1
ENSG00000050130.18	JKAMP	chr14	59484443	59505410	protein_coding	+	20967	559.394	0.231536	0.0120242	0.133943
ENSG00000050165.19	DKK3	chr11	11956207	12009769	protein_coding	-	53562	335.886	-0.201298	0.0750335	0.458872
ENSG00000050327.15	ARHGEF5	chr7	144355288	144380632	protein_coding	+	25344	0.806707	1.89267	0.392621	1
ENSG00000050344.9	NFE2L3	chr7	26152198	26187137	protein_coding	+	34939	321.343	-0.1348	0.430718	1
ENSG00000050393.12	MCUR1	chr6	13786557	13814568	protein_coding	-	28011	444.872	-0.313894	0.0187587	0.182831
ENSG00000050405.14	LIMA1	chr12	50175788	50283520	protein_coding	-	107732	57.0364	-0.32381	0.410334	1
ENSG00000050426.16	LETMD1	chr12	51047962	51060424	protein_coding	+	12462	1067.3	0.0852427	0.459161	1
ENSG00000050438.17	SLC4A8	chr12	51391317	51515763	protein_coding	+	124446	220.331	-2.03709	0.0235151	0.213097
ENSG00000050555.19	LAMC3	chr9	131009174	131094473	protein_coding	+	85299	4.89574	0.751485	0.3259	1
ENSG00000050628.21	PTGER3	chr1	70852353	71047816	protein_coding	-	195463	1.54632	0.818092	0.534884	1
ENSG00000050730.16	TNIP3	chr4	121131408	121227466	protein_coding	-	96058	0	NA	NA	NA
ENSG00000050748.18	MAPK9	chr5	180233143	180292099	protein_coding	-	58956	1072.87	0.219448	0.00729121	0.093438
ENSG00000050767.18	COL23A1	chr5	178237476	178590393	protein_coding	-	352917	0.911527	0.227209	0.918162	1
ENSG00000050820.17	BCAR1	chr16	75228181	75268053	protein_coding	-	39872	0.210549	0.315352	0.937303	1
ENSG00000051009.11	FHIP1B	chr11	6211345	6234711	protein_coding	-	23366	832.826	0.103393	0.383004	1
ENSG00000051108.15	HERPUD1	chr16	56932142	56944864	protein_coding	+	12722	4231.73	-1.17188	6.87654e-10	2.83218e-07
ENSG00000051128.19	HOMER3	chr19	18929201	18941261	protein_coding	-	12060	336.575	0.0377515	0.955539	1
ENSG00000051180.17	RAD51	chr15	40694774	40732340	protein_coding	+	37566	71.76	0.384132	0.016427	0.166504
ENSG00000051341.15	POLQ	chr3	121431431	121545988	protein_coding	-	114557	23.7497	0.0461585	0.880635	1
ENSG00000051382.9	PIK3CB	chr3	138652698	138834928	protein_coding	-	182230	471.824	0.204348	0.108783	0.57201
ENSG00000051523.11	CYBA	chr16	88643289	88651054	protein_coding	-	7765	7544.77	0.430993	0.10107	0.548933
ENSG00000051596.10	THOC3	chr5	175917873	176034680	protein_coding	-	116807	221.712	0.0541575	0.841917	1
ENSG00000051620.11	HEBP2	chr6	138403531	138422197	protein_coding	+	18666	1072.79	0.347326	0.0320469	0.264082
ENSG00000051825.15	MPHOSPH9	chr12	123152320	123244014	protein_coding	-	91694	601.412	0.024309	0.857308	1
ENSG00000052126.15	PLEKHA5	chr12	19129733	19376400	protein_coding	+	246667	0.257502	0	1	1
ENSG00000052344.16	PRSS8	chr16	31131433	31135727	protein_coding	-	4294	2.25445	0.574009	0.434606	1
ENSG00000052723.12	SIKE1	chr1	114769479	114780685	protein_coding	-	11206	1005.35	0.166474	0.113646	0.58837
ENSG00000052749.14	RRP12	chr10	97356358	97426076	protein_coding	-	69718	758.095	-1.81998	1.02116e-12	9.43963e-10
ENSG00000052795.13	FNIP2	chr4	158769026	158908050	protein_coding	+	139024	1.17858	-1.41938	0.396467	1
ENSG00000052802.13	MSMO1	chr4	165327667	165343164	protein_coding	+	15497	260.715	0.0977224	0.524494	1
ENSG00000052841.15	TTC17	chr11	43358920	43494933	protein_coding	+	136013	1906.62	0.177201	0.0731347	0.452852
ENSG00000052850.8	ALX4	chr11	44260440	44310139	protein_coding	-	49699	0.306516	-0.882851	0.752218	1
ENSG00000053108.17	FSTL4	chr5	133196455	133612541	protein_coding	-	416086	1.36176	1.77468	0.132185	0.641916
ENSG00000053254.16	FOXN3	chr14	89124871	89619149	protein_coding	-	494278	3580.66	-0.576294	4.17149e-06	0.000325558
ENSG00000053328.9	METTL24	chr6	110243940	110358349	protein_coding	-	114409	1.60252	0.0522197	0.95851	1
ENSG00000053371.13	AKR7A2	chr1	19303965	19312144	protein_coding	-	8179	414.675	0.263439	0.0628409	0.412898
ENSG00000053372.5	MRTO4	chr1	19251805	19260128	protein_coding	+	8323	425.654	-1.63306	9.07004e-13	8.5749e-10
ENSG00000053438.11	NNAT	chr20	37521206	37523690	protein_coding	+	2484	36.9795	0.357914	0.0724459	0.450531
ENSG00000053501.14	USE1	chr19	17215346	17219829	protein_coding	+	4483	379.677	-0.0153535	0.886079	1
ENSG00000053524.13	MCF2L2	chr3	183178041	183428778	protein_coding	-	250737	34.3729	-0.80975	0.19271	0.7966
ENSG00000053702.15	NRIP2	chr12	2825348	2835544	protein_coding	-	10196	225.633	0.354931	0.0653433	0.422204
ENSG00000053747.17	LAMA3	chr18	23689453	23956222	protein_coding	+	266769	0.267213	0.592673	0.8782	1
ENSG00000053770.12	AP5M1	chr14	57268924	57298742	protein_coding	+	29818	1316.23	0.162452	0.0378078	0.294795
ENSG00000053900.11	ANAPC4	chr4	25377263	25418498	protein_coding	+	41235	887.364	0.274492	0.083639	0.489526
ENSG00000053918.18	KCNQ1	chr11	2444684	2849105	protein_coding	+	404421	232.687	1.13356	0.488823	1
ENSG00000054116.12	TRAPPC3	chr1	36136570	36156053	protein_coding	-	19483	724.95	0.00451043	0.959861	1
ENSG00000054118.15	THRAP3	chr1	36224432	36305357	protein_coding	+	80925	4247.64	0.0125721	0.92682	1
ENSG00000054148.18	PHPT1	chr9	136848724	136851027	protein_coding	+	2303	345.152	-0.773135	1.25698e-05	0.000786284
ENSG00000054179.12	ENTPD2	chr9	137048107	137054061	protein_coding	-	5954	0.435325	1.59541	0.561762	1
ENSG00000054219.11	LY75	chr2	159803355	159904756	protein_coding	-	101401	520.231	-0.904865	0.000307342	0.00878079
ENSG00000054267.22	ARID4B	chr1	235131634	235328219	protein_coding	-	196585	1993.1	-0.0389035	0.690364	1
ENSG00000054277.14	OPN3	chr1	241590102	241677376	protein_coding	-	87274	661.241	-0.0253873	0.877587	1
ENSG00000054282.16	SDCCAG8	chr1	243256034	243500091	protein_coding	+	244057	30.8021	0.439326	0.0965771	0.534088
ENSG00000054356.14	PTPRN	chr2	219289623	219309648	protein_coding	-	20025	2.33351	-1.35782	0.0748512	0.4581
ENSG00000054392.13	HHAT	chr1	210328252	210676296	protein_coding	+	348044	0	NA	NA	NA
ENSG00000054523.19	KIF1B	chr1	10210570	10381603	protein_coding	+	171033	604.355	0.393422	0.0272206	0.235508
ENSG00000054598.9	FOXC1	chr6	1609915	1613897	protein_coding	+	3982	26.2	-1.04862	0.163155	0.726573
ENSG00000054611.14	TBC1D22A	chr22	46762617	47175699	protein_coding	+	413082	1593.66	0.296492	0.0117261	0.131557
ENSG00000054654.20	SYNE2	chr14	63761899	64226433	protein_coding	+	464534	7601.54	1.24288	0.000998547	0.0214554
ENSG00000054690.14	PLEKHH1	chr14	67533290	67589612	protein_coding	+	56322	81.0768	0.243217	0.0442989	0.328872
ENSG00000054793.14	ATP9A	chr20	51596514	51768390	protein_coding	-	171876	9.92118	0.137092	0.952442	1
ENSG00000054796.13	SPO11	chr20	57329803	57343994	protein_coding	+	14191	0	NA	NA	NA
ENSG00000054803.4	CBLN4	chr20	55997357	56005519	protein_coding	-	8162	0	NA	NA	NA
ENSG00000054938.17	CHRDL2	chr11	74696429	74731426	protein_coding	-	34997	0.476588	-0.476315	0.909837	1
ENSG00000054965.11	FAM168A	chr11	73400487	73598189	protein_coding	-	197702	1076.22	0.296491	0.000902736	0.0198793
ENSG00000054967.13	RELT	chr11	73376399	73397474	protein_coding	+	21075	1488.56	-0.167288	0.246501	0.91284
ENSG00000054983.17	GALC	chr14	87837820	87993665	protein_coding	-	155845	288.602	0.176604	0.134273	0.647817
ENSG00000055044.11	NOP58	chr2	202265736	202303661	protein_coding	+	37925	1476.45	-0.751221	1.36479e-07	2.23514e-05
ENSG00000055070.17	SZRD1	chr1	16352575	16398145	protein_coding	+	45570	2931.75	-0.390201	0.000492333	0.0125846
ENSG00000055118.17	KCNH2	chr7	150944961	150978321	protein_coding	-	33360	508.644	3.0785	3.22163e-07	4.24633e-05
ENSG00000055130.18	CUL1	chr7	148697914	148801110	protein_coding	+	103196	1871.03	-0.365746	8.69304e-05	0.00336697
ENSG00000055147.19	FAM114A2	chr5	153990148	154038936	protein_coding	-	48788	447.511	-0.370339	0.00439678	0.0647392
ENSG00000055163.20	CYFIP2	chr5	157266079	157395595	protein_coding	+	129516	9188.2	0.490775	0.000937054	0.0204617
ENSG00000055208.19	TAB2	chr6	149218641	149411613	protein_coding	+	192972	3823.05	-0.186191	0.096262	0.532842
ENSG00000055211.14	GINM1	chr6	149566294	149591748	protein_coding	+	25454	569.444	0.228901	0.199776	0.812798
ENSG00000055332.19	EIF2AK2	chr2	37099210	37157522	protein_coding	-	58312	1250.54	0.103492	0.544846	1
ENSG00000055483.20	USP36	chr17	78787381	78841441	protein_coding	-	54060	1413.42	-0.502846	9.83009e-05	0.00365426
ENSG00000055609.21	KMT2C	chr7	152134922	152436644	protein_coding	-	301722	3173	0.172258	0.347651	1
ENSG00000055732.13	MCOLN3	chr1	85018082	85048500	protein_coding	-	30418	16.8772	-1.73749	0.000239707	0.00729032
ENSG00000055813.6	CCDC85A	chr2	56183990	56386172	protein_coding	+	202182	0	NA	NA	NA
ENSG00000055917.16	PUM2	chr2	20248691	20352234	protein_coding	-	103543	4704.67	0.0307054	0.820607	1
ENSG00000055950.17	MRPL43	chr10	100969458	100987515	protein_coding	-	18057	647.519	0.145466	0.111287	0.58026
ENSG00000055955.17	ITIH4	chr3	52812962	52830688	protein_coding	-	17726	9.75317	0.0493691	0.890744	1
ENSG00000055957.11	ITIH1	chr3	52777595	52792068	protein_coding	+	14473	2.50609	0.45387	0.607117	1
ENSG00000056050.7	HPF1	chr4	169729470	169757944	protein_coding	-	28474	192.249	-0.286048	0.0951916	0.529665
ENSG00000056097.16	ZFR	chr5	32354350	32444740	protein_coding	-	90390	2507.24	-0.308072	0.013166	0.142847
ENSG00000056277.16	ZNF280C	chrX	130202707	130268899	protein_coding	-	66192	164.702	-0.181378	0.351464	1
ENSG00000056291.19	NPFFR2	chr4	72031902	72148305	protein_coding	+	116403	0.129195	0	1	1
ENSG00000056487.16	PHF21B	chr22	44881162	45010005	protein_coding	-	128843	0.0956845	-0.476315	0.909837	1
ENSG00000056558.11	TRAF1	chr9	120902393	120929173	protein_coding	-	26780	2453.19	-1.42495	3.43631e-06	0.000281385
ENSG00000056586.16	RC3H2	chr9	122844556	122905359	protein_coding	-	60803	1971.95	0.0257233	0.805119	1
ENSG00000056736.10	IL17RB	chr3	53846568	53865794	protein_coding	+	19226	199.893	0.157265	0.470389	1
ENSG00000056972.20	TRAF3IP2	chr6	111555381	111606906	protein_coding	-	51525	470.126	-0.0689504	0.749946	1
ENSG00000056998.20	GYG2	chrX	2828822	2882820	protein_coding	+	53998	0.193315	0.921216	0.826582	1
ENSG00000057019.16	DCBLD2	chr3	98795941	98901695	protein_coding	-	105754	1.10567	-1.49557	0.473987	1
ENSG00000057149.16	SERPINB3	chr18	63655197	63661893	protein_coding	-	6696	0.0645977	0	1	1
ENSG00000057252.13	SOAT1	chr1	179293714	179358680	protein_coding	+	64966	806.727	-0.185213	0.311627	1
ENSG00000057294.16	PKP2	chr12	32790755	32896777	protein_coding	-	106022	0.323754	-0.887383	0.81199	1
ENSG00000057468.7	MSH4	chr1	75796882	75913242	protein_coding	+	116360	7.64896	-0.602026	0.198277	0.810147
ENSG00000057593.14	F7	chr13	113105788	113120685	protein_coding	+	14897	0.265909	0.605697	0.885497	1
ENSG00000057608.17	GDI2	chr10	5765223	5842132	protein_coding	-	76909	5866.43	-0.238782	0.0531729	0.370376
ENSG00000057657.17	PRDM1	chr6	105993463	106109939	protein_coding	+	116476	31.7846	-0.506444	0.419717	1
ENSG00000057663.16	ATG5	chr6	106045423	106325791	protein_coding	-	280368	576.833	-0.163958	0.0459969	0.336566
ENSG00000057704.13	TMCC3	chr12	94567122	94650557	protein_coding	-	83435	586.945	-0.449767	0.0751597	0.459272
ENSG00000057757.10	PITHD1	chr1	23778418	23788232	protein_coding	+	9814	1078.29	-0.0585764	0.579387	1
ENSG00000057935.14	MTA3	chr2	42494569	42756947	protein_coding	+	262378	475.446	0.140775	0.381798	1
ENSG00000058056.10	USP13	chr3	179653032	179804366	protein_coding	+	151334	222.303	-0.0247281	0.872534	1
ENSG00000058063.16	ATP11B	chr3	182793503	182921629	protein_coding	+	128126	2256.12	0.110316	0.198103	0.809976
ENSG00000058085.15	LAMC2	chr1	183186238	183245127	protein_coding	+	58889	0.190737	0.605697	0.885497	1
ENSG00000058091.17	CDK14	chr7	90466424	91210590	protein_coding	+	744166	8063.7	-0.0813009	0.659268	1
ENSG00000058262.10	SEC61A1	chr3	128051641	128071683	protein_coding	+	20042	2778.03	-0.324664	0.000164261	0.00544891
ENSG00000058272.19	PPP1R12A	chr12	79773563	79935460	protein_coding	-	161897	2028.45	0.0295263	0.829479	1
ENSG00000058335.16	RASGRF1	chr15	78959906	79090780	protein_coding	-	130874	2561.77	-1.13292	0.000172123	0.00566006
ENSG00000058404.20	CAMK2B	chr7	44217150	44334577	protein_coding	-	117427	1.81868	-0.937897	0.24379	0.907292
ENSG00000058453.17	CROCC	chr1	16740273	16972964	protein_coding	+	232691	1298.26	0.409732	0.0699459	0.44072
ENSG00000058600.16	POLR3E	chr16	22297375	22335101	protein_coding	+	37726	15.9714	-0.763568	0.0107357	0.124017
ENSG00000058668.15	ATP2B4	chr1	203626787	203744081	protein_coding	+	117294	4674.8	0.219968	0.120127	0.608355
ENSG00000058673.17	ZC3H11A	chr1	203795623	203854999	protein_coding	+	59376	4.3117	0.789466	0.217907	0.853692
ENSG00000058729.11	RIOK2	chr5	97160867	97183247	protein_coding	-	22380	444.348	-0.416535	0.00151664	0.0293575
ENSG00000058799.15	YIPF1	chr1	53851719	53889798	protein_coding	-	38079	320.421	-0.0378553	0.692294	1
ENSG00000058804.12	NDC1	chr1	53765478	53838463	protein_coding	-	72985	602.842	-0.405939	0.00504348	0.0717261
ENSG00000058866.15	DGKG	chr3	186105668	186362234	protein_coding	-	256566	930.258	-0.801307	0.00710727	0.0917308
ENSG00000059122.17	FLYWCH1	chr16	2911931	2951208	protein_coding	+	39277	1894.5	0.511391	0.0407784	0.31045
ENSG00000059145.19	UNKL	chr16	1363205	1414751	protein_coding	-	51546	1276.29	0.588084	0.00748707	0.0952214
ENSG00000059377.18	TBXAS1	chr7	139777051	140020325	protein_coding	+	243274	30.2577	0.893701	0.521222	1
ENSG00000059378.13	PARP12	chr7	140023749	140062951	protein_coding	-	39202	985.936	0.208183	0.276911	0.965903
ENSG00000059573.9	ALDH18A1	chr10	95605941	95656711	protein_coding	-	50770	1087.25	-0.464604	0.00184418	0.0337981
ENSG00000059588.10	TARBP1	chr1	234391313	234479179	protein_coding	-	87866	907.575	0.0517337	0.730552	1
ENSG00000059691.12	GATB	chr4	151670504	151761007	protein_coding	-	90503	218.763	-0.565132	0.00492148	0.070376
ENSG00000059728.11	MXD1	chr2	69897688	69942945	protein_coding	+	45257	434.064	0.22193	0.139566	0.661827
ENSG00000059758.8	CDK17	chr12	96278261	96400480	protein_coding	-	122219	1130.68	-0.196221	0.279674	0.969942
ENSG00000059769.20	DNAJC25	chr9	111631334	111654351	protein_coding	+	23017	95.1607	-0.611682	0.000396268	0.0106074
ENSG00000059804.16	SLC2A3	chr12	7919230	7936187	protein_coding	-	16957	578.205	-0.452754	0.300261	1
ENSG00000059915.17	PSD	chr10	102402617	102421539	protein_coding	-	18922	266.773	0.065702	0.701599	1
ENSG00000060069.18	CTDP1	chr18	79679803	79754503	protein_coding	+	74700	359.268	-0.172013	0.313402	1
ENSG00000060138.13	YBX3	chr12	10699089	10723323	protein_coding	-	24234	5523.2	0.388638	0.108933	0.572145
ENSG00000060140.9	STYK1	chr12	10618923	10674318	protein_coding	-	55395	0.664841	1.57129	0.513758	1
ENSG00000060237.19	WNK1	chr12	752579	911452	protein_coding	+	158873	6196.89	-0.201667	0.191241	0.793183
ENSG00000060303.5	RPS17P5	chr6	50857255	50857662	processed_pseudogene	-	407	0.0998196	-0.115644	0.978065	1
ENSG00000060339.14	CCAR1	chr10	68721012	68792377	protein_coding	+	71365	1599.7	-0.118816	0.231693	0.88274
ENSG00000060491.17	OGFR	chr20	62804835	62814000	protein_coding	+	9165	1719.42	0.0415621	0.790017	1
ENSG00000060558.4	GNA15	chr19	3136033	3163749	protein_coding	+	27716	0.612098	0.482311	0.772061	1
ENSG00000060566.14	CREB3L3	chr19	4153631	4173054	protein_coding	+	19423	0.138982	0.605697	0.885497	1
ENSG00000060642.12	PIGV	chr1	26787054	26800659	protein_coding	+	13605	378.253	-0.0764849	0.640175	1
ENSG00000060656.20	PTPRU	chr1	29236516	29326813	protein_coding	+	90297	2.85268	1.00427	0.213583	0.843942
ENSG00000060688.13	SNRNP40	chr1	31259568	31296788	protein_coding	-	37220	599.01	-0.23552	0.0390423	0.301034
ENSG00000060709.16	RIMBP2	chr12	130396133	130768228	protein_coding	-	372095	0.664021	0	1	1
ENSG00000060718.22	COL11A1	chr1	102876467	103108872	protein_coding	-	232405	0.304183	-0.836985	0.842268	1
ENSG00000060749.16	QSER1	chr11	32892811	32993316	protein_coding	+	100505	639.384	0.119946	0.401236	1
ENSG00000060762.19	MPC1	chr6	166364919	166383013	protein_coding	-	18094	434.306	-0.0105207	0.968651	1
ENSG00000060971.19	ACAA1	chr3	38103129	38137242	protein_coding	-	34113	838.846	0.151241	0.240294	0.900948
ENSG00000060982.15	BCAT1	chr12	24810024	24949101	protein_coding	-	139077	958.18	-1.70826	0.137235	0.655861
ENSG00000061273.18	HDAC7	chr12	47782722	47833132	protein_coding	-	50410	5187.47	0.221068	0.307406	1
ENSG00000061337.15	LZTS1	chr8	20246165	20303963	protein_coding	-	57798	0.134851	-0.115644	0.978065	1
ENSG00000061455.11	PRDM6	chr5	123089241	123194266	protein_coding	+	105025	0.537664	-0.770917	0.684349	1
ENSG00000061492.12	WNT8A	chr5	138083990	138092365	protein_coding	+	8375	0.224779	0.928227	0.818177	1
ENSG00000061656.11	SPAG4	chr20	35615829	35621094	protein_coding	+	5265	54.0335	0.34735	0.337133	1
ENSG00000061676.15	NCKAP1	chr2	182909115	183038858	protein_coding	-	129743	0.322989	0	1	1
ENSG00000061794.13	MRPS35	chr12	27710822	27756295	protein_coding	+	45473	520.938	-0.700238	0.00082651	0.0186146
ENSG00000061918.14	GUCY1B1	chr4	155758992	155807811	protein_coding	+	48819	0.106922	0	1	1
ENSG00000061936.10	SFSWAP	chr12	131711081	131799738	protein_coding	+	88657	2560.03	0.256211	0.136266	0.653448
ENSG00000061938.21	TNK2	chr3	195863364	195911945	protein_coding	-	48581	3241.7	0.605334	0.0011559	0.0241132
ENSG00000061987.16	MON2	chr12	62466817	62600476	protein_coding	+	133659	1587.94	0.120932	0.352671	1
ENSG00000062038.15	CDH3	chr16	68636189	68727468	protein_coding	+	91279	8.74672	1.92761	9.44846e-05	0.00356658
ENSG00000062096.15	ARSF	chrX	3041471	3112727	protein_coding	+	71256	0.0322989	0	1	1
ENSG00000062194.16	GPBP1	chr5	57173948	57264679	protein_coding	+	90731	2990.62	-0.0820763	0.356636	1
ENSG00000062282.15	DGAT2	chr11	75759512	75801535	protein_coding	+	42023	168.976	-0.583869	0.155397	0.705594
ENSG00000062370.17	ZNF112	chr19	44326555	44367217	protein_coding	-	40662	0.226026	1.03733	0.805061	1
ENSG00000062485.19	CS	chr12	56271699	56300391	protein_coding	-	28692	2280.79	-0.249813	0.0513186	0.362005
ENSG00000062524.16	LTK	chr15	41503637	41513887	protein_coding	-	10250	457.474	0.371262	0.706906	1
ENSG00000062582.14	MRPS24	chr7	43866558	43869893	protein_coding	-	3335	8.92319	-0.169183	0.657865	1
ENSG00000062598.18	ELMO2	chr20	46366050	46432985	protein_coding	-	66935	963.148	-0.412533	6.64991e-06	0.000466543
ENSG00000062650.20	WAPL	chr10	86435256	86521792	protein_coding	-	86536	2157.87	-0.0418157	0.745393	1
ENSG00000062716.13	VMP1	chr17	59707192	59842255	protein_coding	+	135063	1058.73	-0.77359	2.75068e-08	5.99072e-06
ENSG00000062725.10	APPBP2	chr17	60443158	60526242	protein_coding	-	83084	1047.25	0.125629	0.196159	0.804714
ENSG00000062822.16	POLD1	chr19	50384204	50418018	protein_coding	+	33814	737.902	0.221833	0.113256	0.58714
ENSG00000063015.21	SEZ6	chr17	28954901	29006440	protein_coding	-	51539	8.53102	0.5587	0.259736	0.935809
ENSG00000063046.18	EIF4B	chr12	53006282	53042215	protein_coding	+	35933	15189.6	0.0172166	0.907357	1
ENSG00000063127.16	SLC6A16	chr19	49289638	49325215	protein_coding	-	35577	314.759	0.835523	3.50182e-07	4.52387e-05
ENSG00000063169.12	BICRA	chr19	47608196	47703277	protein_coding	+	95081	655.201	0.123636	0.254235	0.926633
ENSG00000063176.16	SPHK2	chr19	48619291	48630717	protein_coding	+	11426	449.155	-0.0598538	0.655326	1
ENSG00000063177.13	RPL18	chr19	48615328	48619184	protein_coding	-	3856	12509.5	-0.0476746	0.631199	1
ENSG00000063180.9	CA11	chr19	48637946	48646187	protein_coding	-	8241	428.907	-0.0401202	0.858025	1
ENSG00000063241.8	ISOC2	chr19	55452985	55462343	protein_coding	-	9358	226.012	-1.15737	6.39602e-06	0.000451718
ENSG00000063244.13	U2AF2	chr19	55654146	55674716	protein_coding	+	20570	6540.42	0.0493931	0.548035	1
ENSG00000063245.15	EPN1	chr19	55675226	55709858	protein_coding	+	34632	1487.41	0.164016	0.327083	1
ENSG00000063322.15	MED29	chr19	39391303	39400641	protein_coding	+	9338	1329.94	0.0471158	0.614081	1
ENSG00000063438.20	AHRR	chr5	321714	438291	protein_coding	+	116577	0.472601	1.34819	0.540547	1
ENSG00000063515.3	GSC2	chr22	19146993	19150292	protein_coding	-	3299	0.0314102	0	1	1
ENSG00000063587.15	ZNF275	chrX	153334147	153360110	protein_coding	+	25963	1268.62	-0.377198	0.0232552	0.211725
ENSG00000063601.17	MTMR1	chrX	150692971	150765108	protein_coding	+	72137	1763.98	0.310557	0.00241264	0.0413859
ENSG00000063660.9	GPC1	chr2	240435663	240468076	protein_coding	+	32413	24.6982	0.456322	0.391363	1
ENSG00000063761.16	ADCK1	chr14	77800109	77935014	protein_coding	+	134905	160.445	-0.20456	0.276944	0.965903
ENSG00000063854.13	HAGH	chr16	1795620	1827157	protein_coding	-	31537	601.878	0.47382	0.0162295	0.165429
ENSG00000063978.16	RNF4	chr4	2462220	2625320	protein_coding	+	163100	1925.26	-0.178337	0.109203	0.573203
ENSG00000064012.23	CASP8	chr2	201233443	201287711	protein_coding	+	54268	2206.17	0.616576	0.00219212	0.0385084
ENSG00000064042.18	LIMCH1	chr4	41359607	41700044	protein_coding	+	340437	145.099	-0.58753	0.56554	1
ENSG00000064102.15	INTS13	chr12	26905181	26938326	protein_coding	-	33145	419.293	-0.492921	0.00530749	0.0746133
ENSG00000064115.11	TM7SF3	chr12	26971579	27014434	protein_coding	-	42855	888.882	0.0586287	0.749216	1
ENSG00000064195.7	DLX3	chr17	49990005	49995224	protein_coding	-	5219	0.505406	-1.38578	0.643882	1
ENSG00000064199.7	SPA17	chr11	124673844	124697518	protein_coding	+	23674	13.4143	-0.199242	0.655442	1
ENSG00000064201.16	TSPAN32	chr11	2301997	2318204	protein_coding	+	16207	313.937	0.392428	0.341868	1
ENSG00000064205.11	CCN5	chr20	44714844	44728509	protein_coding	+	13665	0.156256	-0.115644	0.978065	1
ENSG00000064218.5	DMRT3	chr9	976655	991732	protein_coding	+	15077	0	NA	NA	NA
ENSG00000064225.13	ST3GAL6	chr3	98732236	98821201	protein_coding	+	88965	0.29069	0	1	1
ENSG00000064270.13	ATP2C2	chr16	84368527	84464187	protein_coding	+	95660	7.16402	-0.226195	0.688412	1
ENSG00000064300.9	NGFR	chr17	49495293	49515008	protein_coding	+	19715	2.73947	-0.424292	0.66857	1
ENSG00000064309.16	CDON	chr11	125955796	126063335	protein_coding	-	107539	0.505494	-1.0944	0.619751	1
ENSG00000064313.13	TAF2	chr8	119730774	119832863	protein_coding	-	102089	888.088	-0.0552713	0.492479	1
ENSG00000064393.16	HIPK2	chr7	139561570	139777998	protein_coding	-	216428	1512.55	0.1369	0.657467	1
ENSG00000064419.14	TNPO3	chr7	128954180	129055173	protein_coding	-	100993	1387.79	-0.244565	0.0247112	0.220777
ENSG00000064489.23	BORCS8-MEF2B	chr19	19145569	19192158	protein_coding	-	46589	0.917414	-1.37621	0.370834	1
ENSG00000064490.14	RFXANK	chr19	19192229	19201869	protein_coding	+	9640	877.558	-0.201593	0.0541527	0.374926
ENSG00000064545.15	TMEM161A	chr19	19119169	19138513	protein_coding	-	19344	286.076	-0.308469	0.0605814	0.402723
ENSG00000064547.14	LPAR2	chr19	19623655	19628930	protein_coding	-	5275	385.641	0.434167	0.0179775	0.177827
ENSG00000064601.21	CTSA	chr20	45890144	45898949	protein_coding	+	8805	2090.67	-0.258408	0.163837	0.728131
ENSG00000064607.17	SUGP2	chr19	18990888	19034023	protein_coding	-	43135	3489.8	0.279521	0.154933	0.704825
ENSG00000064651.14	SLC12A2	chr5	128083766	128189677	protein_coding	+	105911	614.428	-0.335791	0.0847401	0.493493
ENSG00000064652.11	SNX24	chr5	122843439	123029354	protein_coding	+	185915	51.8802	-0.046988	0.836904	1
ENSG00000064655.19	EYA2	chr20	46894624	47188844	protein_coding	+	294220	0.321211	0	1	1
ENSG00000064666.15	CNN2	chr19	1026586	1039068	protein_coding	+	12482	4448.18	0.434897	0.0310201	0.258583
ENSG00000064687.13	ABCA7	chr19	1039997	1065572	protein_coding	+	25575	6234.56	0.963879	6.2766e-05	0.0026561
ENSG00000064692.20	SNCAIP	chr5	122311354	122464219	protein_coding	+	152865	0.20396	-0.115644	0.977263	1
ENSG00000064703.13	DDX20	chr1	111754832	111775602	protein_coding	+	20770	602.335	-0.0159532	0.880996	1
ENSG00000064726.10	BTBD1	chr15	83016423	83067252	protein_coding	-	50829	1636.26	-0.125673	0.177353	0.762001
ENSG00000064763.12	FAR2	chr12	29149016	29341121	protein_coding	+	192105	162.195	-0.112435	0.447741	1
ENSG00000064787.14	BCAS1	chr20	53936777	54070594	protein_coding	-	133817	7.31965	1.37212	0.0778132	0.468976
ENSG00000064835.12	POU1F1	chr3	87259404	87276584	protein_coding	-	17180	2.44408	0.364252	0.71315	1
ENSG00000064886.14	CHI3L2	chr1	111200771	111243440	protein_coding	+	42669	340.747	-0.409193	0.578565	1
ENSG00000064932.16	SBNO2	chr19	1107637	1174268	protein_coding	-	66631	61.7541	0.303464	0.147142	0.682552
ENSG00000064933.19	PMS1	chr2	189784085	189877629	protein_coding	+	93544	717.462	0.1588	0.344208	1
ENSG00000064961.19	HMG20B	chr19	3572777	3579088	protein_coding	+	6311	1367.5	0.0150421	0.921741	1
ENSG00000064989.13	CALCRL	chr2	187341964	187448460	protein_coding	-	106496	0.0322989	0	1	1
ENSG00000064995.19	TAF11	chr6	34877462	34889192	protein_coding	-	11730	838.038	0.26102	0.0659451	0.42446
ENSG00000064999.15	ANKS1A	chr6	34889255	35091406	protein_coding	+	202151	455.936	0.114382	0.256905	0.932036
ENSG00000065000.19	AP3D1	chr19	2100988	2164468	protein_coding	-	63480	3225.22	-0.27119	0.00142908	0.0281605
ENSG00000065029.15	ZNF76	chr6	35258909	35295985	protein_coding	+	37076	1626.52	0.40857	0.0103609	0.120784
ENSG00000065054.14	SLC9A3R2	chr16	2025356	2039026	protein_coding	+	13670	14.4979	0.318997	0.742925	1
ENSG00000065057.9	NTHL1	chr16	2039815	2047866	protein_coding	-	8051	174.076	-0.23158	0.208036	0.832263
ENSG00000065060.18	UHRF1BP1	chr6	34792083	34877514	protein_coding	+	85431	795.95	-0.224394	0.167576	0.738905
ENSG00000065135.12	GNAI3	chr1	109548615	109600195	protein_coding	+	51580	1032.74	-0.465235	0.000647818	0.0154429
ENSG00000065150.21	IPO5	chr13	97953658	98024296	protein_coding	+	70638	2313.21	-0.468606	0.000814273	0.0183988
ENSG00000065154.12	OAT	chr10	124397303	124418976	protein_coding	-	21673	415.95	0.0499154	0.64423	1
ENSG00000065183.16	WDR3	chr1	117929720	117966543	protein_coding	+	36823	564.754	-1.13984	5.79723e-08	1.07675e-05
ENSG00000065243.20	PKN2	chr1	88684222	88836255	protein_coding	+	152033	1005.68	0.23131	0.0741758	0.456209
ENSG00000065268.11	WDR18	chr19	984332	998438	protein_coding	+	14106	450.314	-0.312047	0.13694	0.65496
ENSG00000065308.5	TRAM2	chr6	52497408	52577060	protein_coding	-	79652	1718.77	0.373465	0.0117766	0.131949
ENSG00000065320.9	NTN1	chr17	9021510	9244000	protein_coding	+	222490	21.6093	-0.416545	0.210561	0.83813
ENSG00000065325.13	GLP2R	chr17	9822206	9892099	protein_coding	+	69893	0.161494	0	1	1
ENSG00000065328.17	MCM10	chr10	13161558	13211110	protein_coding	+	49552	1.75985	-1.95269	0.149766	0.689563
ENSG00000065357.20	DGKA	chr12	55927319	55954027	protein_coding	+	26708	6083.34	0.545064	0.00918275	0.1104
ENSG00000065361.17	ERBB3	chr12	56076799	56103505	protein_coding	+	26706	4.12004	0.38964	0.570562	1
ENSG00000065371.18	ROPN1	chr3	123968521	123992178	protein_coding	-	23657	0	NA	NA	NA
ENSG00000065413.20	ANKRD44	chr2	196967017	197311173	protein_coding	-	344156	4658.53	0.312013	0.0832975	0.488139
ENSG00000065427.15	KARS1	chr16	75627474	75648643	protein_coding	-	21169	2542.71	-0.571753	2.82238e-05	0.00144674
ENSG00000065457.11	ADAT1	chr16	75596868	75623300	protein_coding	-	26432	629.608	-0.226831	0.156018	0.707052
ENSG00000065485.20	PDIA5	chr3	123067025	123225227	protein_coding	+	158202	37.9551	-0.674364	0.34005	1
ENSG00000065491.8	TBC1D22B	chr6	37257772	37332970	protein_coding	+	75198	440.242	-0.294764	0.00241569	0.0414042
ENSG00000065518.8	NDUFB4	chr3	120596328	120602507	protein_coding	+	6179	629.284	-0.0915391	0.298292	1
ENSG00000065526.12	SPEN	chr1	15836095	15940456	protein_coding	+	104361	8508.98	-0.326366	0.215633	0.848139
ENSG00000065534.20	MYLK	chr3	123610049	123884332	protein_coding	-	274283	103.246	-0.43317	0.445503	1
ENSG00000065548.18	ZC3H15	chr2	186486253	186509361	protein_coding	+	23108	1021.63	-0.424685	0.000323113	0.00910627
ENSG00000065559.15	MAP2K4	chr17	12020829	12143830	protein_coding	+	123001	758.744	-0.305957	0.00634839	0.0851323
ENSG00000065600.13	PACC1	chr1	212363928	212414901	protein_coding	-	50973	346.124	-0.38483	0.00334163	0.0528737
ENSG00000065609.15	SNAP91	chr6	83552880	83709691	protein_coding	-	156811	0	NA	NA	NA
ENSG00000065613.15	SLK	chr10	103967140	104029233	protein_coding	+	62093	858.555	0.119445	0.385535	1
ENSG00000065615.14	CYB5R4	chr6	83859656	83967423	protein_coding	+	107767	956.516	-0.108073	0.373148	1
ENSG00000065618.21	COL17A1	chr10	104031286	104085880	protein_coding	-	54594	1.45792	-1.4323	0.284406	0.977504
ENSG00000065621.15	GSTO2	chr10	104268873	104304950	protein_coding	+	36077	13.3985	0.0821416	0.854326	1
ENSG00000065665.21	SEC61A2	chr10	12129637	12169961	protein_coding	+	40324	443.731	-0.144476	0.267108	0.949105
ENSG00000065675.16	PRKCQ	chr10	6427143	6580301	protein_coding	-	153158	0.446687	0.593374	0.826427	1
ENSG00000065717.15	TLE2	chr19	2997639	3047635	protein_coding	-	49996	18.3644	1.29938	0.0398876	0.30542
ENSG00000065802.12	ASB1	chr2	238426742	238452250	protein_coding	+	25508	1289.56	0.190099	0.0229114	0.209374
ENSG00000065809.14	FAM107B	chr10	14518557	14774897	protein_coding	-	256340	4613.24	-0.520633	0.018298	0.17988
ENSG00000065833.9	ME1	chr6	83210402	83431051	protein_coding	-	220649	0	NA	NA	NA
ENSG00000065882.17	TBC1D1	chr4	37891084	38139175	protein_coding	+	248091	3531.47	0.123209	0.429468	1
ENSG00000065883.17	CDK13	chr7	39950121	40099580	protein_coding	+	149459	2131.33	0.121052	0.280027	0.970714
ENSG00000065911.13	MTHFD2	chr2	74186172	74217565	protein_coding	+	31393	1651.33	-2.12186	2.799e-10	1.3698e-07
ENSG00000065923.10	SLC9A7	chrX	46599251	46759118	protein_coding	-	159867	4970.96	0.384409	0.0140445	0.149648
ENSG00000065970.9	FOXJ2	chr12	8032716	8055517	protein_coding	+	22801	1071.95	0.31223	0.0553412	0.380761
ENSG00000065978.19	YBX1	chr1	42682418	42703805	protein_coding	+	21387	10208.9	-0.831943	8.64162e-06	0.000579797
ENSG00000065989.16	PDE4A	chr19	10416773	10469630	protein_coding	+	52857	449.474	0.451091	0.199314	0.811739
ENSG00000066027.12	PPP2R5A	chr1	212285410	212361853	protein_coding	+	76443	1541.79	-0.0709809	0.558213	1
ENSG00000066032.19	CTNNA2	chr2	79185231	80648861	protein_coding	+	1463630	0.226092	0	1	1
ENSG00000066044.15	ELAVL1	chr19	7958573	8005659	protein_coding	-	47086	1568.4	-0.274415	0.00296168	0.048337
ENSG00000066056.14	TIE1	chr1	43300982	43323108	protein_coding	+	22126	1.23265	0.288493	0.837075	1
ENSG00000066084.13	DIP2B	chr12	50504985	50748657	protein_coding	+	243672	1713.17	0.0441759	0.773558	1
ENSG00000066117.15	SMARCD1	chr12	50085200	50100707	protein_coding	+	15507	1904.9	-0.0561821	0.687622	1
ENSG00000066135.13	KDM4A	chr1	43650149	43705518	protein_coding	+	55369	503.429	-0.157966	0.0951761	0.52965
ENSG00000066136.21	NFYC	chr1	40691648	40771603	protein_coding	+	79955	1145.89	-0.0320151	0.751545	1
ENSG00000066185.13	ZMYND12	chr1	42430329	42456253	protein_coding	-	25924	5.97294	0.0497009	0.918907	1
ENSG00000066230.12	SLC9A3	chr5	470456	524449	protein_coding	-	53993	88.5924	0.199113	0.527918	1
ENSG00000066248.15	NGEF	chr2	232878701	233013256	protein_coding	-	134555	1.9715	-0.257501	0.817431	1
ENSG00000066279.19	ASPM	chr1	197084121	197146694	protein_coding	-	62573	2.67808	1.50802	0.121363	0.611748
ENSG00000066294.15	CD84	chr1	160541095	160579516	protein_coding	-	38421	4979.8	-0.105846	0.553118	1
ENSG00000066322.15	ELOVL1	chr1	43363398	43368074	protein_coding	-	4676	1041	-0.0826253	0.26968	0.954249
ENSG00000066336.12	SPI1	chr11	47354860	47378547	protein_coding	-	23687	1611.18	0.124323	0.510236	1
ENSG00000066379.15	POLR1H	chr6	30058899	30064909	protein_coding	+	6010	0.577106	-1.44266	0.594667	1
ENSG00000066382.17	MPPED2	chr11	30384493	30586872	protein_coding	-	202379	0.376311	0	1	1
ENSG00000066405.13	CLDN18	chr3	137998735	138033655	protein_coding	+	34920	0.0322989	0	1	1
ENSG00000066422.6	ZBTB11	chr3	101648889	101677135	protein_coding	-	28246	1234.08	0.128552	0.31998	1
ENSG00000066427.25	ATXN3	chr14	92044496	92106621	protein_coding	-	62125	713.036	0.309084	0.045888	0.336029
ENSG00000066455.13	GOLGA5	chr14	92794305	92839947	protein_coding	+	45642	612.953	-0.106102	0.222168	0.863955
ENSG00000066468.24	FGFR2	chr10	121478332	121598458	protein_coding	-	120126	0.532466	0	1	1
ENSG00000066557.6	LRRC40	chr1	70144805	70205579	protein_coding	-	60774	391.085	-0.397604	0.00419478	0.0626326
ENSG00000066583.12	ISOC1	chr5	129094749	129114028	protein_coding	+	19279	294.406	-0.400503	0.00509129	0.0722578
ENSG00000066629.18	EML1	chr14	99737693	99942060	protein_coding	+	204367	0.276518	0.245027	0.949188	1
ENSG00000066651.20	TRMT11	chr6	125986479	126203817	protein_coding	+	217338	361.114	0.0361058	0.847044	1
ENSG00000066654.14	THUMPD1	chr16	20702816	20742084	protein_coding	-	39268	1218.86	-0.0424568	0.703008	1
ENSG00000066697.15	MSANTD3	chr9	100427143	100451734	protein_coding	+	24591	134.519	0.261022	0.0486416	0.349285
ENSG00000066735.15	KIF26A	chr14	104138587	104180894	protein_coding	+	42307	0.129195	0	1	1
ENSG00000066739.12	ATG2B	chr14	96279195	96363341	protein_coding	-	84146	1422.06	0.0311291	0.693863	1
ENSG00000066777.9	ARFGEF1	chr8	67173511	67343781	protein_coding	-	170270	1926.38	-0.127527	0.326658	1
ENSG00000066813.14	ACSM2B	chr16	20536226	20576427	protein_coding	-	40201	0.0859708	0.245026	0.953546	1
ENSG00000066827.16	ZFAT	chr8	134477788	134713049	protein_coding	-	235261	328.682	0.0723378	0.571909	1
ENSG00000066855.16	MTFR1	chr8	65644734	65771261	protein_coding	+	126527	440.625	0.331635	0.021506	0.200131
ENSG00000066923.18	STAG3	chr7	100177563	100221488	protein_coding	+	43925	385.04	0.258695	0.175447	0.75747
ENSG00000066926.13	FECH	chr18	57544377	57586732	protein_coding	-	42355	392.027	-0.269042	0.103533	0.556715
ENSG00000066933.16	MYO9A	chr15	71822291	72118577	protein_coding	-	296286	1248.22	0.00937127	0.955687	1
ENSG00000067048.17	DDX3Y	chrY	12904108	12920478	protein_coding	+	16370	2391.88	0.324353	0.85182	1
ENSG00000067057.18	PFKP	chr10	3066333	3137718	protein_coding	+	71385	1496.36	-0.148093	0.678614	1
ENSG00000067064.12	IDI1	chr10	1039152	1049119	protein_coding	-	9967	999.205	0.102043	0.212903	0.843319
ENSG00000067066.17	SP100	chr2	230415942	230545606	protein_coding	+	129664	4548.96	0.380557	0.0168291	0.169711
ENSG00000067082.15	KLF6	chr10	3775996	3785281	protein_coding	-	9285	7229.35	-0.347345	0.54068	1
ENSG00000067113.17	PLPP1	chr5	55424854	55534969	protein_coding	-	110115	323.392	-0.480717	0.000812979	0.0183795
ENSG00000067141.17	NEO1	chr15	73051710	73305205	protein_coding	+	253495	342.463	0.118388	0.729365	1
ENSG00000067167.8	TRAM1	chr8	70573218	70608416	protein_coding	-	35198	3806.75	-0.188088	0.0907871	0.51508
ENSG00000067177.15	PHKA1	chrX	72578814	72714319	protein_coding	-	135505	1.63429	1.91169	0.0913163	0.517291
ENSG00000067182.8	TNFRSF1A	chr12	6328757	6342114	protein_coding	-	13357	452.43	0.0140522	0.98943	1
ENSG00000067191.16	CACNB1	chr17	39173453	39197703	protein_coding	-	24250	203.976	-0.385335	0.0905458	0.514251
ENSG00000067208.16	EVI5	chr1	92508696	92792404	protein_coding	-	283708	283.012	-0.0903465	0.610386	1
ENSG00000067221.14	STOML1	chr15	73978926	73994622	protein_coding	-	15696	105.27	-0.157699	0.566202	1
ENSG00000067225.20	PKM	chr15	72199029	72231819	protein_coding	-	32790	11409	-1.11619	6.24246e-06	0.000442374
ENSG00000067248.11	DHX29	chr5	55256055	55307694	protein_coding	-	51639	566.089	-0.302756	0.00209746	0.0372386
ENSG00000067334.14	DNTTIP2	chr1	93866284	93879918	protein_coding	-	13634	966.144	-0.359622	0.00139898	0.0276986
ENSG00000067365.15	METTL22	chr16	8621683	8649654	protein_coding	+	27971	268.955	0.145259	0.257812	0.932971
ENSG00000067369.14	TP53BP1	chr15	43403061	43510728	protein_coding	-	107667	2174.51	-0.201394	0.0105359	0.122128
ENSG00000067445.22	TRO	chrX	54920462	54931431	protein_coding	+	10969	168.2	0.347313	0.405514	1
ENSG00000067533.6	RRP15	chr1	218285293	218337983	protein_coding	+	52690	431.387	-0.830498	3.63411e-08	7.52099e-06
ENSG00000067560.14	RHOA	chr3	49359139	49412998	protein_coding	-	53859	9438.62	-0.573564	1.12901e-07	1.90913e-05
ENSG00000067596.12	DHX8	chr17	43483865	43610338	protein_coding	+	126473	1287.3	-0.155037	0.0839361	0.490665
ENSG00000067601.9	PMS2P4	chr7	67139961	67302485	transcribed_unprocessed_pseudogene	-	162524	67.442	-0.161883	0.451648	1
ENSG00000067606.17	PRKCZ	chr1	2050411	2185395	protein_coding	+	134984	713.93	0.13254	0.309795	1
ENSG00000067646.12	ZFY	chrY	2935281	2982506	protein_coding	+	47225	424.078	-0.158784	0.926266	1
ENSG00000067704.10	IARS2	chr1	220094132	220148041	protein_coding	+	53909	1571.32	-0.259373	0.0228116	0.20869
ENSG00000067715.14	SYT1	chr12	78863993	79452008	protein_coding	+	588015	0.357635	0.363477	0.907079	1
ENSG00000067798.16	NAV3	chr12	77324641	78213010	protein_coding	+	888369	0.653792	-1.42956	0.679859	1
ENSG00000067829.20	IDH3G	chrX	153785766	153794512	protein_coding	-	8746	889.539	-0.0995591	0.261414	0.939047
ENSG00000067836.13	ROGDI	chr16	4796968	4802880	protein_coding	-	5912	70.2981	0.490915	0.285445	0.978772
ENSG00000067840.13	PDZD4	chrX	153802166	153830565	protein_coding	-	28399	0.39394	-0.119565	0.950472	1
ENSG00000067842.18	ATP2B3	chrX	153517642	153582939	protein_coding	+	65297	0.2789	-0.476317	0.883943	1
ENSG00000067900.8	ROCK1	chr18	20946906	21111813	protein_coding	-	164907	3244.63	-0.0300401	0.75467	1
ENSG00000067955.15	CBFB	chr16	67028984	67101058	protein_coding	+	72074	1543.56	-0.192469	0.107786	0.568941
ENSG00000067992.17	PDK3	chrX	24465244	24550466	protein_coding	+	85222	820.125	0.325917	0.120232	0.608592
ENSG00000068001.14	HYAL2	chr3	50317790	50322782	protein_coding	-	4992	146.11	0.202044	0.525056	1
ENSG00000068024.18	HDAC4	chr2	239048168	239401654	protein_coding	-	353486	166.014	-0.753418	0.0132974	0.143861
ENSG00000068028.18	RASSF1	chr3	50329782	50340980	protein_coding	-	11198	1845.76	0.757291	0.00016367	0.00543464
ENSG00000068078.20	FGFR3	chr4	1793293	1808872	protein_coding	+	15579	1.80967	-1.11232	0.464226	1
ENSG00000068079.8	IFI35	chr17	43006740	43014456	protein_coding	+	7716	376.305	-0.192569	0.122283	0.614411
ENSG00000068097.16	HEATR6	chr17	60041008	60078922	protein_coding	-	37914	1070.11	0.253671	0.0305604	0.256115
ENSG00000068120.15	COASY	chr17	42561467	42566277	protein_coding	+	4810	1302.1	-0.0516462	0.539667	1
ENSG00000068137.15	PLEKHH3	chr17	42667914	42676994	protein_coding	-	9080	28.4846	-1.74369	0.000120154	0.00428292
ENSG00000068305.18	MEF2A	chr15	99565417	99716488	protein_coding	+	151071	1718.73	-0.296281	0.00788116	0.0990156
ENSG00000068308.15	OTUD5	chrX	48922024	48958386	protein_coding	-	36362	2757.63	0.0870961	0.294668	0.995258
ENSG00000068323.17	TFE3	chrX	49028726	49043410	protein_coding	-	14684	1196.24	-0.309485	0.000189858	0.00608454
ENSG00000068354.16	TBC1D25	chrX	48539714	48562609	protein_coding	+	22895	545.842	0.122081	0.241205	0.902551
ENSG00000068366.21	ACSL4	chrX	109624244	109733403	protein_coding	-	109159	852.946	-0.538911	0.000710893	0.0165668
ENSG00000068383.19	INPP5A	chr10	132537787	132783480	protein_coding	+	245693	350.028	0.402982	0.0663924	0.425917
ENSG00000068394.11	GPKOW	chrX	49113407	49123735	protein_coding	-	10328	362.922	-0.268253	0.0201055	0.190773
ENSG00000068400.13	GRIPAP1	chrX	48973720	49002264	protein_coding	-	28544	1705.15	0.0974392	0.461137	1
ENSG00000068438.15	FTSJ1	chrX	48476021	48486364	protein_coding	+	10343	669.347	-0.333707	0.00139413	0.0276455
ENSG00000068489.13	PRR11	chr17	59155732	59206709	protein_coding	+	50977	33.0595	0.18512	0.39162	1
ENSG00000068615.20	REEP1	chr2	86213993	86338083	protein_coding	-	124090	1.12543	-1.61821	0.244306	0.90827
ENSG00000068650.19	ATP11A	chr13	112690038	112887168	protein_coding	+	197130	2244.85	0.170402	0.324388	1
ENSG00000068654.17	POLR1A	chr2	86020216	86106155	protein_coding	-	85939	1249.87	-0.785101	2.38858e-08	5.48952e-06
ENSG00000068697.7	LAPTM4A	chr2	20032650	20051628	protein_coding	-	18978	1933.61	0.226842	0.00694326	0.0903145
ENSG00000068724.17	TTC7A	chr2	46916157	47076137	protein_coding	+	159980	1488.19	0.25416	0.0495741	0.354004
ENSG00000068745.15	IP6K2	chr3	48688003	48740353	protein_coding	-	52350	1049.06	0.0372706	0.706991	1
ENSG00000068781.21	STON1-GTF2A1L	chr2	48529925	48776517	protein_coding	+	246592	0	NA	NA	NA
ENSG00000068784.13	SRBD1	chr2	45388680	45612165	protein_coding	-	223485	224.336	-0.632031	0.00529628	0.0745062
ENSG00000068796.19	KIF2A	chr5	62306162	62391025	protein_coding	+	84863	1778.13	-0.0659577	0.638557	1
ENSG00000068831.19	RASGRP2	chr11	64726911	64745456	protein_coding	-	18545	4719.91	1.25372	0.00135178	0.0270734
ENSG00000068878.15	PSME4	chr2	53864069	53970993	protein_coding	-	106924	1512.11	-0.185616	0.227222	0.873887
ENSG00000068885.15	IFT80	chr3	160256986	160399880	protein_coding	-	142894	242.444	0.514597	0.0236951	0.214322
ENSG00000068903.21	SIRT2	chr19	38878555	38899862	protein_coding	-	21307	0.364791	-0.515946	0.81313	1
ENSG00000068912.15	ERLEC1	chr2	53787009	53833038	protein_coding	+	46029	849.251	-0.0574091	0.542013	1
ENSG00000068971.14	PPP2R5B	chr11	64917553	64934475	protein_coding	+	16922	938.334	0.469798	0.149189	0.68787
ENSG00000068976.14	PYGM	chr11	64746389	64759974	protein_coding	-	13585	169.391	1.15372	0.000799132	0.0181652
ENSG00000068985.5	PAGE1	chrX	49687447	49695984	protein_coding	-	8537	0	NA	NA	NA
ENSG00000069011.16	PITX1	chr5	135027734	135034813	protein_coding	-	7079	0.287998	0.0698216	0.982965	1
ENSG00000069018.19	TRPC7	chr5	136212745	136365545	protein_coding	-	152800	0.236745	0	1	1
ENSG00000069020.19	MAST4	chr5	66596380	67169593	protein_coding	+	573213	527.686	0.4403	0.623697	1
ENSG00000069122.19	ADGRF5	chr6	46852522	46954943	protein_coding	-	102421	0.161494	0	1	1
ENSG00000069188.17	SDK2	chr17	73334384	73644445	protein_coding	-	310061	1821.34	-0.0427195	0.920351	1
ENSG00000069206.15	ADAM7	chr8	24440930	24526970	protein_coding	+	86040	0.0645977	0	1	1
ENSG00000069248.12	NUP133	chr1	229440259	229508341	protein_coding	-	68082	1117.09	-0.136373	0.176179	0.758868
ENSG00000069275.13	NUCKS1	chr1	205712822	205750182	protein_coding	-	37360	2821.26	-0.282329	0.0348763	0.27975
ENSG00000069329.18	VPS35	chr16	46656132	46689518	protein_coding	-	33386	2317.71	-0.176615	0.106212	0.565595
ENSG00000069345.12	DNAJA2	chr16	46955362	46973674	protein_coding	-	18312	1513.6	-0.268801	0.00227571	0.0395605
ENSG00000069399.15	BCL3	chr19	44747705	44760044	protein_coding	+	12339	519.425	-0.0644795	0.813176	1
ENSG00000069424.16	KCNAB2	chr1	5990927	6101193	protein_coding	+	110266	2397.05	-0.233495	0.15606	0.707089
ENSG00000069431.14	ABCC9	chr12	21797389	21942543	protein_coding	-	145154	0.354634	0	1	1
ENSG00000069482.7	GAL	chr11	68683779	68691175	protein_coding	+	7396	0.151084	-0.476315	0.909837	1
ENSG00000069493.15	CLEC2D	chr12	9664969	9699553	protein_coding	+	34584	2967.27	0.734235	0.0434241	0.324476
ENSG00000069509.6	FUNDC1	chrX	44523639	44542859	protein_coding	-	19220	134.333	-0.163683	0.403706	1
ENSG00000069535.14	MAOB	chrX	43766610	43882450	protein_coding	-	115840	0.0968966	0	1	1
ENSG00000069667.16	RORA	chr15	60488284	61229302	protein_coding	-	741018	318.981	0.0622047	0.905249	1
ENSG00000069696.7	DRD4	chr11	637269	640706	protein_coding	+	3437	0.41176	-0.115645	0.952434	1
ENSG00000069702.11	TGFBR3	chr1	91680343	91906335	protein_coding	-	225992	634.26	-1.49501	0.0821114	0.483837
ENSG00000069764.10	PLA2G10	chr16	14672548	14694308	protein_coding	-	21760	0	NA	NA	NA
ENSG00000069812.11	HES2	chr1	6412418	6424670	protein_coding	-	12252	0.0645977	0	1	1
ENSG00000069849.11	ATP1B3	chr3	141876124	141926549	protein_coding	+	50425	1533.01	-0.97448	3.92975e-05	0.00187036
ENSG00000069869.17	NEDD4	chr15	55826922	55993660	protein_coding	-	166738	8.89166	-0.52025	0.74303	1
ENSG00000069943.10	PIGB	chr15	55318960	55355648	protein_coding	+	36688	421.303	0.0621581	0.583334	1
ENSG00000069956.14	MAPK6	chr15	51952106	52067375	protein_coding	+	115269	590.839	-0.955001	6.0439e-06	0.000432726
ENSG00000069966.19	GNB5	chr15	52115100	52191392	protein_coding	-	76292	1846.12	0.601147	1.08363e-06	0.000112311
ENSG00000069974.16	RAB27A	chr15	55202966	55319113	protein_coding	-	116147	449.605	-0.485861	0.000804905	0.0182558
ENSG00000069998.12	HDHD5	chr22	17137511	17165287	protein_coding	-	27776	426.27	-0.135186	0.193095	0.797542
ENSG00000070010.19	UFD1	chr22	19449911	19479202	protein_coding	-	29291	928.913	-0.0136148	0.881769	1
ENSG00000070018.9	LRP6	chr12	12116025	12267044	protein_coding	-	151019	0	NA	NA	NA
ENSG00000070019.5	GUCY2C	chr12	14612632	14696599	protein_coding	-	83967	61.1443	1.40324	0.00629596	0.084757
ENSG00000070031.4	SCT	chr11	626309	627181	protein_coding	-	872	0	NA	NA	NA
ENSG00000070047.13	PHRF1	chr11	576470	612222	protein_coding	+	35752	13.7191	-0.956801	0.480889	1
ENSG00000070061.16	ELP1	chr9	108866898	108934328	protein_coding	-	67430	1266.41	0.125694	0.375834	1
ENSG00000070081.18	NUCB2	chr11	17208153	17349980	protein_coding	+	141827	111.637	0.439491	0.162184	0.723825
ENSG00000070087.15	PFN2	chr3	149964904	150050788	protein_coding	-	85884	261.41	-0.340104	0.510898	1
ENSG00000070159.14	PTPN3	chr9	109375466	109498313	protein_coding	-	122847	0.258391	0	1	1
ENSG00000070182.21	SPTB	chr14	64746283	64879907	protein_coding	-	133624	1.08732	-0.591204	0.70062	1
ENSG00000070190.13	DAPP1	chr4	99816827	99870190	protein_coding	+	53363	1291.41	0.330509	0.102754	0.554466
ENSG00000070193.5	FGF10	chr5	44300247	44389706	protein_coding	-	89459	0.0968966	0	1	1
ENSG00000070214.16	SLC44A1	chr9	105244622	105439171	protein_coding	+	194549	406.164	0.299901	0.258624	0.933647
ENSG00000070269.14	TMEM260	chr14	56488354	56650606	protein_coding	+	162252	590.175	0.14532	0.134936	0.649436
ENSG00000070366.14	SMG6	chr17	2059839	2303785	protein_coding	-	243946	864.822	-0.079046	0.364377	1
ENSG00000070367.16	EXOC5	chr14	57200507	57268905	protein_coding	-	68398	1399.06	-0.119124	0.306469	1
ENSG00000070371.16	CLTCL1	chr22	19179473	19291719	protein_coding	-	112246	54.1331	0.236697	0.652464	1
ENSG00000070388.12	FGF22	chr19	639879	644373	protein_coding	+	4494	54.0378	0.825381	0.284718	0.978027
ENSG00000070404.10	FSTL3	chr19	676392	683392	protein_coding	+	7000	17.8149	-1.05395	0.264187	0.944164
ENSG00000070413.20	DGCR2	chr22	19036282	19122454	protein_coding	-	86172	2025.5	0.204239	0.00680387	0.0890864
ENSG00000070423.18	RNF126	chr19	647526	663233	protein_coding	-	15707	1458.21	0.00742991	0.957788	1
ENSG00000070444.15	MNT	chr17	2384073	2401104	protein_coding	-	17031	710.6	-0.067775	0.517003	1
ENSG00000070476.15	ZXDC	chr3	126437601	126475891	protein_coding	-	38290	969.59	0.00440546	0.960333	1
ENSG00000070495.15	JMJD6	chr17	76712832	76726799	protein_coding	-	13967	493.926	0.0656861	0.633927	1
ENSG00000070501.12	POLB	chr8	42338454	42371808	protein_coding	+	33354	196.172	-0.242131	0.0213858	0.199374
ENSG00000070526.15	ST6GALNAC1	chr17	76624761	76643786	protein_coding	-	19025	0.0576111	-0.476315	0.909837	1
ENSG00000070540.13	WIPI1	chr17	68420948	68457513	protein_coding	-	36565	240.365	-0.684858	7.91909e-05	0.00314932
ENSG00000070601.10	FRMPD1	chr9	37650954	37746904	protein_coding	+	95950	38.3344	-0.987941	0.357018	1
ENSG00000070610.14	GBA2	chr9	35736866	35749228	protein_coding	-	12362	2616.61	0.136335	0.159575	0.716848
ENSG00000070614.15	NDST1	chr5	150485818	150558211	protein_coding	+	72393	721.141	0.101539	0.472286	1
ENSG00000070669.17	ASNS	chr7	97851677	97872542	protein_coding	-	20865	103.97	-0.60094	0.037521	0.293217
ENSG00000070718.12	AP3M2	chr8	42152946	42171673	protein_coding	+	18727	247.867	-0.354154	0.0741424	0.456203
ENSG00000070729.14	CNGB1	chr16	57882340	57971128	protein_coding	-	88788	0.150569	0.245026	0.953546	1
ENSG00000070731.11	ST6GALNAC2	chr17	76565377	76586956	protein_coding	-	21579	0.0719314	0.605697	0.885497	1
ENSG00000070748.19	CHAT	chr10	49609095	49667942	protein_coding	+	58847	0.161494	0	1	1
ENSG00000070756.17	PABPC1	chr8	100685816	100722809	protein_coding	-	36993	31167.8	-0.387075	0.0047249	0.0681979
ENSG00000070759.17	TESK2	chr1	45343883	45491163	protein_coding	-	147280	294.863	0.256271	0.327797	1
ENSG00000070761.8	CFAP20	chr16	58113592	58129381	protein_coding	-	15789	381.618	-0.177907	0.185622	0.780897
ENSG00000070770.10	CSNK2A2	chr16	58157907	58198106	protein_coding	-	40199	1386.21	-0.110625	0.148769	0.686617
ENSG00000070778.13	PTPN21	chr14	88465778	88555007	protein_coding	-	89229	0.588061	0.0538302	0.97906	1
ENSG00000070785.17	EIF2B3	chr1	44850522	44986722	protein_coding	-	136200	163.647	-0.604445	0.00162094	0.0307188
ENSG00000070808.17	CAMK2A	chr5	150219491	150290093	protein_coding	-	70602	0.0800577	0.605697	0.885497	1
ENSG00000070814.22	TCOF1	chr5	150357629	150400308	protein_coding	+	42679	1717.42	-0.274166	0.00908319	0.109678
ENSG00000070831.17	CDC42	chr1	22025511	22101360	protein_coding	+	75849	4476.47	-0.176102	0.0632319	0.413963
ENSG00000070882.13	OSBPL3	chr7	24796540	24981634	protein_coding	-	185094	849.636	0.708007	0.0904591	0.51406
ENSG00000070886.12	EPHA8	chr1	22563489	22603595	protein_coding	+	40106	0.45696	0.673938	0.708043	1
ENSG00000070915.10	SLC12A3	chr16	56865207	56915850	protein_coding	+	50643	122.372	0.290301	0.729272	1
ENSG00000070950.10	RAD18	chr3	8775402	8963773	protein_coding	-	188371	309.431	0.00999399	0.92603	1
ENSG00000070961.16	ATP2B1	chr12	89588049	89709300	protein_coding	-	121251	4653.97	0.0207578	0.916081	1
ENSG00000070985.13	TRPM5	chr11	2404515	2423045	protein_coding	-	18530	1.62947	2.84328	0.0479572	0.346161
ENSG00000071051.14	NCK2	chr2	105744912	105894274	protein_coding	+	149362	1814.37	0.264171	0.245991	0.911684
ENSG00000071054.17	MAP4K4	chr2	101696850	101894690	protein_coding	+	197840	1665.4	0.0811978	0.918502	1
ENSG00000071073.13	MGAT4A	chr2	98619106	98731132	protein_coding	-	112026	94.1068	1.08315	0.0189575	0.183946
ENSG00000071082.11	RPL31	chr2	101002229	101024032	protein_coding	+	21803	9628.2	-0.0496637	0.636783	1
ENSG00000071127.17	WDR1	chr4	10074339	10116949	protein_coding	-	42610	4996.33	-0.394052	8.12395e-07	9.01173e-05
ENSG00000071189.21	SNX13	chr7	17790761	17940501	protein_coding	-	149740	935.13	0.0328664	0.788487	1
ENSG00000071203.9	MS4A12	chr11	60492778	60507430	protein_coding	+	14652	0.0373115	0	1	1
ENSG00000071205.12	ARHGAP10	chr4	147732063	148072776	protein_coding	+	340713	1.09184	-1.40087	0.438736	1
ENSG00000071242.12	RPS6KA2	chr6	166409364	166906451	protein_coding	-	497087	1203.62	0.104204	0.63834	1
ENSG00000071243.16	ING3	chr7	120950763	120977216	protein_coding	+	26453	542.671	-0.238093	0.00642253	0.085686
ENSG00000071246.11	VASH1	chr14	76761468	76783015	protein_coding	+	21547	1823.09	0.171175	0.845113	1
ENSG00000071282.12	LMCD1	chr3	8501807	8574668	protein_coding	+	72861	6.76313	-0.179377	0.916235	1
ENSG00000071462.12	BUD23	chr7	73683025	73705161	protein_coding	+	22136	1352.41	-0.403038	0.000105655	0.00384855
ENSG00000071537.14	SEL1L	chr14	81471547	81533853	protein_coding	-	62306	2283.62	-0.652719	0.000334184	0.0092986
ENSG00000071539.14	TRIP13	chr5	892884	919357	protein_coding	+	26473	23.6254	-1.00869	0.00669592	0.088061
ENSG00000071553.18	ATP6AP1	chrX	154428633	154436516	protein_coding	+	7883	1770.63	0.179489	0.0657754	0.423799
ENSG00000071564.17	TCF3	chr19	1609290	1652615	protein_coding	-	43325	7073.73	0.218273	0.324497	1
ENSG00000071575.12	TRIB2	chr2	12716910	12742734	protein_coding	+	25824	105.354	0.152452	0.783893	1
ENSG00000071626.17	DAZAP1	chr19	1407569	1435687	protein_coding	+	28118	2522.53	-0.589662	4.18707e-06	0.000325558
ENSG00000071655.18	MBD3	chr19	1573596	1592865	protein_coding	-	19269	1045.43	-0.254304	0.0249957	0.222425
ENSG00000071677.1	PRLH	chr2	237566574	237567175	protein_coding	+	601	0	NA	NA	NA
ENSG00000071794.16	HLTF	chr3	149030127	149086554	protein_coding	-	56427	591.944	0.0659172	0.656496	1
ENSG00000071859.15	FAM50A	chrX	154444141	154450654	protein_coding	+	6513	1024.32	-0.168258	0.15232	0.69667
ENSG00000071889.17	FAM3A	chrX	154506159	154516242	protein_coding	-	10083	705.494	0.0515355	0.553282	1
ENSG00000071894.17	CPSF1	chr8	144393229	144409335	protein_coding	-	16106	1.6967	0.556514	0.608586	1
ENSG00000071909.19	MYO3B	chr2	170178145	170655171	protein_coding	+	477026	0.0645977	0	1	1
ENSG00000071967.12	CYBRD1	chr2	171522247	171558129	protein_coding	+	35882	409.197	-0.632566	0.38456	1
ENSG00000071991.9	CDH19	chr18	66501083	66604138	protein_coding	-	103055	0.0645977	0	1	1
ENSG00000071994.11	PDCD2	chr6	170575295	170584692	protein_coding	-	9397	1058.48	-0.200373	0.0150798	0.156901
ENSG00000072041.18	SLC6A15	chr12	84859491	84913629	protein_coding	-	54138	0.161494	0	1	1
ENSG00000072042.13	RDH11	chr14	67676800	67695793	protein_coding	-	18993	716.929	0.174801	0.0564043	0.385215
ENSG00000072062.15	PRKACA	chr19	14091688	14118084	protein_coding	-	26396	1.07663	0.51311	0.701303	1
ENSG00000072071.17	ADGRL1	chr19	14147743	14206187	protein_coding	-	58444	0.0373115	0	1	1
ENSG00000072080.11	SPP2	chr2	234050679	234077134	protein_coding	+	26455	0	NA	NA	NA
ENSG00000072110.16	ACTN1	chr14	68874128	68979440	protein_coding	-	105312	2.388	-3.99533	0.00166819	0.0313429
ENSG00000072121.17	ZFYVE26	chr14	67727374	67816590	protein_coding	-	89216	1457.12	-0.0877717	0.367773	1
ENSG00000072133.11	RPS6KA6	chrX	84058346	84188199	protein_coding	-	129853	7.12176	0.010257	0.996811	1
ENSG00000072134.16	EPN2	chr17	19215615	19336715	protein_coding	+	121100	202.044	-0.149505	0.649624	1
ENSG00000072135.13	PTPN18	chr2	130356045	130375405	protein_coding	+	19360	1805.29	0.279256	0.267406	0.949921
ENSG00000072163.20	LIMS2	chr2	127638381	127681786	protein_coding	-	43405	84.6659	0.715543	0.0606496	0.403019
ENSG00000072182.14	ASIC4	chr2	219514170	219538772	protein_coding	+	24602	1.16148	1.43931	0.245974	0.911684
ENSG00000072195.15	SPEG	chr2	219434843	219493629	protein_coding	+	58786	2.30498	-0.101822	0.914173	1
ENSG00000072201.14	LNX1	chr4	53459301	53701405	protein_coding	-	242104	271.256	-0.359769	0.0194022	0.186186
ENSG00000072210.19	ALDH3A2	chr17	19648136	19685760	protein_coding	+	37624	1566.14	0.0990547	0.593923	1
ENSG00000072274.13	TFRC	chr3	196027183	196082096	protein_coding	-	54913	3253.7	-1.04201	2.75049e-06	0.000235907
ENSG00000072310.18	SREBF1	chr17	17810399	17837002	protein_coding	-	26603	1304.36	0.497255	0.182528	0.773433
ENSG00000072315.4	TRPC5	chrX	111768011	112082776	protein_coding	-	314765	2.04765	1.11531	0.259608	0.935566
ENSG00000072364.13	AFF4	chr5	132875395	132963634	protein_coding	-	88239	2817.16	0.152727	0.283912	0.977017
ENSG00000072401.15	UBE2D1	chr10	58334979	58370751	protein_coding	+	35772	287	-0.226752	0.0415144	0.314729
ENSG00000072415.10	PALS1	chr14	67240713	67336061	protein_coding	+	95348	399.971	0.357772	0.00727202	0.0932495
ENSG00000072422.17	RHOBTB1	chr10	60869438	61001440	protein_coding	-	132002	0.226092	0	1	1
ENSG00000072501.19	SMC1A	chrX	53374149	53422728	protein_coding	-	48579	2596.99	-0.167107	0.293287	0.992527
ENSG00000072506.14	HSD17B10	chrX	53431258	53434370	protein_coding	-	3112	800.083	-0.716837	0.00110491	0.0231942
ENSG00000072518.22	MARK2	chr11	63838928	63911020	protein_coding	+	72092	1844.65	0.164555	0.0657349	0.423747
ENSG00000072571.20	HMMR	chr5	163460203	163491941	protein_coding	+	31738	16.2281	0.0644364	0.858887	1
ENSG00000072609.18	CHFR	chr12	132822187	132956304	protein_coding	-	134117	1270.06	-0.0468984	0.777789	1
ENSG00000072657.10	TRHDE	chr12	72087266	72670758	protein_coding	+	583492	0.143025	0.605697	0.885497	1
ENSG00000072682.20	P4HA2	chr5	132190147	132295315	protein_coding	-	105168	3.21157	0.100978	0.925664	1
ENSG00000072694.22	FCGR2B	chr1	161663143	161678654	protein_coding	+	15511	1925.54	0.661875	0.000724599	0.0168202
ENSG00000072736.19	NFATC3	chr16	68084751	68229259	protein_coding	+	144508	1573.31	0.0851864	0.504654	1
ENSG00000072756.17	TRNT1	chr3	3126933	3150879	protein_coding	+	23946	530.445	-0.0126871	0.921222	1
ENSG00000072778.20	ACADVL	chr17	7217125	7225266	protein_coding	+	8141	6465.06	-0.111397	0.663065	1
ENSG00000072786.13	STK10	chr5	172042079	172188224	protein_coding	-	146145	4661.27	-0.0507811	0.59847	1
ENSG00000072803.18	FBXW11	chr5	171861549	172006873	protein_coding	-	145324	1608.49	-0.105859	0.473818	1
ENSG00000072818.12	ACAP1	chr17	7336529	7351477	protein_coding	+	14948	2.53949	-0.26263	0.777008	1
ENSG00000072832.15	CRMP1	chr4	5748084	5893086	protein_coding	-	145002	87.9376	0.174703	0.862097	1
ENSG00000072840.13	EVC	chr4	5711201	5814305	protein_coding	+	103104	340.182	0.128426	0.893005	1
ENSG00000072849.11	DERL2	chr17	5471254	5486811	protein_coding	-	15557	726.172	0.0445013	0.601739	1
ENSG00000072858.11	SIDT1	chr3	113532555	113629575	protein_coding	+	97020	976.714	0.408553	0.000416971	0.0110479
ENSG00000072864.16	NDE1	chr16	15643267	15734691	protein_coding	+	91424	7.97232	0.129972	0.765914	1
ENSG00000072952.20	IRAG1	chr11	10573091	10693988	protein_coding	-	120897	24.1967	2.06429	0.000311073	0.00884484
ENSG00000072954.7	TMEM38A	chr19	16661139	16690023	protein_coding	+	28884	171.569	0.619051	0.031423	0.260844
ENSG00000072958.9	AP1M1	chr19	16197854	16245906	protein_coding	+	48052	2153.88	0.195419	0.186965	0.78387
ENSG00000073008.15	PVR	chr19	44643798	44666162	protein_coding	+	22364	11.2154	0.0658065	0.975197	1
ENSG00000073050.12	XRCC1	chr19	43543311	43580473	protein_coding	-	37162	464.853	-0.0909026	0.408659	1
ENSG00000073060.17	SCARB1	chr12	124776856	124882668	protein_coding	-	105812	16.8144	-0.0507107	0.953255	1
ENSG00000073067.14	CYP2W1	chr7	983181	989640	protein_coding	+	6459	2.20121	-0.0899255	0.915765	1
ENSG00000073111.14	MCM2	chr3	127598410	127622436	protein_coding	+	24026	825.138	-0.160592	0.189366	0.78946
ENSG00000073146.16	MOV10L1	chr22	50089879	50161690	protein_coding	+	71811	0.0645977	0	1	1
ENSG00000073150.14	PANX2	chr22	50170731	50180295	protein_coding	+	9564	2.19596	-1.62643	0.19814	0.810043
ENSG00000073169.15	SELENOO	chr22	50201011	50217616	protein_coding	+	16605	721.177	0.339318	0.00789447	0.0990929
ENSG00000073282.14	TP63	chr3	189631389	189897276	protein_coding	+	265887	1.81599	-1.16321	0.542965	1
ENSG00000073331.18	ALPK1	chr4	112285509	112442621	protein_coding	+	157112	792.238	-0.0228797	0.88012	1
ENSG00000073350.14	LLGL2	chr17	75525080	75575209	protein_coding	+	50129	447.602	0.462893	0.0141075	0.150012
ENSG00000073417.15	PDE8A	chr15	84980440	85139145	protein_coding	+	158705	661.306	-0.0843665	0.746155	1
ENSG00000073464.13	CLCN4	chrX	10156975	10237660	protein_coding	+	80685	551.799	-0.647876	0.0798012	0.47606
ENSG00000073536.18	NLE1	chr17	35128730	35142304	protein_coding	-	13574	303.717	-0.453696	0.00434482	0.0643189
ENSG00000073578.18	SDHA	chr5	218303	257082	protein_coding	+	38779	82.2421	0.47262	0.00838634	0.103579
ENSG00000073584.20	SMARCE1	chr17	40624962	40648654	protein_coding	-	23692	204.067	0.0962718	0.486992	1
ENSG00000073598.6	FNDC8	chr17	35121615	35130732	protein_coding	+	9117	42.1834	-0.506123	0.019815	0.189008
ENSG00000073605.19	GSDMB	chr17	39904595	39919854	protein_coding	-	15259	965.061	0.485193	0.172648	0.751117
ENSG00000073614.13	KDM5A	chr12	280057	389320	protein_coding	-	109263	2771.81	-0.00381562	0.983917	1
ENSG00000073670.14	ADAM11	chr17	44758988	44781846	protein_coding	+	22858	33.7275	1.17878	0.00104593	0.0222471
ENSG00000073711.11	PPP2R3A	chr3	135965728	136147894	protein_coding	+	182166	14.474	0.897721	0.0117882	0.132032
ENSG00000073712.15	FERMT2	chr14	52857268	52952435	protein_coding	-	95167	3.0979	-0.0203439	0.981958	1
ENSG00000073734.10	ABCB11	chr2	168915498	169031324	protein_coding	-	115826	0.767903	-1.02018	0.667759	1
ENSG00000073737.17	DHRS9	chr2	169064789	169096167	protein_coding	+	31378	1.54776	-1.11209	0.494455	1
ENSG00000073754.6	CD5L	chr1	157830911	157898256	protein_coding	-	67345	4.30014	-0.499709	0.693811	1
ENSG00000073756.13	PTGS2	chr1	186671791	186680922	protein_coding	-	9131	0.0968966	0	1	1
ENSG00000073792.16	IGF2BP2	chr3	185643130	185825042	protein_coding	-	181912	1.14347	-0.58807	0.765402	1
ENSG00000073803.14	MAP3K13	chr3	185282941	185489094	protein_coding	+	206153	284.103	-0.320476	0.308899	1
ENSG00000073849.16	ST6GAL1	chr3	186930325	187078553	protein_coding	+	148228	16413.9	0.0589242	0.71712	1
ENSG00000073861.3	TBX21	chr17	47733236	47746122	protein_coding	+	12886	260.639	0.107951	0.725145	1
ENSG00000073905.8	VDAC1P1	chrX	80929500	80930347	processed_pseudogene	+	847	6.0473	-1.70071	0.00152561	0.0295036
ENSG00000073910.23	FRY	chr13	31846713	32299125	protein_coding	+	452412	1651.3	0.234226	0.56414	1
ENSG00000073921.18	PICALM	chr11	85957175	86069882	protein_coding	-	112707	1631.22	-0.11856	0.353711	1
ENSG00000073969.18	NSF	chr17	46590669	46757464	protein_coding	+	166795	0.206734	0.245027	0.932571	1
ENSG00000074047.22	GLI2	chr2	120735623	120992653	protein_coding	+	257030	0.086173	0.245026	0.953546	1
ENSG00000074054.20	CLASP1	chr2	121337776	121649476	protein_coding	-	311700	1637.4	0.0672913	0.515094	1
ENSG00000074071.15	MRPS34	chr16	1771890	1773150	protein_coding	-	1260	832.604	-0.184083	0.183092	0.774878
ENSG00000074181.9	NOTCH3	chr19	15159038	15200995	protein_coding	-	41957	0.0874017	-0.476315	0.909837	1
ENSG00000074201.9	CLNS1A	chr11	77514936	77637794	protein_coding	-	122858	919.297	-0.349081	0.00447118	0.0655132
ENSG00000074211.14	PPP2R2C	chr4	6320578	6563600	protein_coding	-	243022	0.150844	0	1	1
ENSG00000074219.14	TEAD2	chr19	49340595	49362457	protein_coding	-	21862	1753.87	0.782272	0.000338011	0.0093737
ENSG00000074266.22	EED	chr11	86244753	86278813	protein_coding	+	34060	803.842	0.0121029	0.928224	1
ENSG00000074276.11	CDHR2	chr5	176542511	176595974	protein_coding	+	53463	15.7368	0.914849	0.0136907	0.147083
ENSG00000074317.11	SNCB	chr5	176620082	176630556	protein_coding	-	10474	2.36146	0.0479775	0.982533	1
ENSG00000074319.13	TSG101	chr11	18468336	18526951	protein_coding	-	58615	809.795	-0.402082	0.00235419	0.0405949
ENSG00000074356.17	NCBP3	chr17	3802158	3846246	protein_coding	-	44088	1611.54	0.0649316	0.383165	1
ENSG00000074370.18	ATP2A3	chr17	3923870	3964464	protein_coding	-	40594	10398.2	0.759258	7.58764e-05	0.00305252
ENSG00000074410.14	CA12	chr15	63321378	63381846	protein_coding	-	60468	0.612888	1.81443	0.302285	1
ENSG00000074416.16	MGLL	chr3	127689062	128052190	protein_coding	-	363128	124.696	-1.37067	0.124981	0.622257
ENSG00000074527.13	NTN4	chr12	95657807	95791189	protein_coding	-	133382	0.61699	-0.652156	0.792323	1
ENSG00000074582.15	BCS1L	chr2	218658764	218663443	protein_coding	+	4679	639.097	-0.35946	0.0759239	0.46194
ENSG00000074590.14	NUAK1	chr12	106063345	106138954	protein_coding	-	75609	1.24657	1.75084	0.296013	0.997295
ENSG00000074603.19	DPP8	chr15	65442463	65517704	protein_coding	-	75241	1822.2	0.235946	0.00277451	0.0459816
ENSG00000074621.14	SLC24A1	chr15	65611366	65660995	protein_coding	+	49629	318.833	0.044018	0.708186	1
ENSG00000074657.14	ZNF532	chr18	58862600	58986480	protein_coding	+	123880	776.107	-0.335731	0.417188	1
ENSG00000074660.17	SCARF1	chr17	1633858	1645744	protein_coding	-	11886	0.0960968	0	1	1
ENSG00000074695.6	LMAN1	chr18	59327823	59359265	protein_coding	-	31442	1609.1	0.0382715	0.745452	1
ENSG00000074696.13	HACD3	chr15	65530418	65578349	protein_coding	+	47931	649.296	0.00936895	0.928039	1
ENSG00000074706.14	IPCEF1	chr6	154154496	154356803	protein_coding	-	202307	108.722	-0.474815	0.540843	1
ENSG00000074755.15	ZZEF1	chr17	4004445	4143030	protein_coding	-	138585	2932.02	0.106307	0.281095	0.972441
ENSG00000074771.4	NOX3	chr6	155395368	155455839	protein_coding	-	60471	1.45459	-0.583161	0.606186	1
ENSG00000074800.16	ENO1	chr1	8861000	8879190	protein_coding	-	18190	7396.7	-1.20491	3.07705e-07	4.13183e-05
ENSG00000074803.21	SLC12A1	chr15	48178438	48304078	protein_coding	+	125640	2.97528	-1.29323	0.283201	0.975846
ENSG00000074842.8	MYDGF	chr19	4641374	4670362	protein_coding	-	28988	485.019	-0.464151	0.00485068	0.0695309
ENSG00000074855.11	ANO8	chr19	17323223	17334855	protein_coding	-	11632	167.128	0.563713	0.288501	0.983774
ENSG00000074935.14	TUBE1	chr6	112070663	112087529	protein_coding	-	16866	493.3	-0.134742	0.417218	1
ENSG00000074964.17	ARHGEF10L	chr1	17539698	17697874	protein_coding	+	158176	359.351	0.523699	0.07088	0.444386
ENSG00000074966.11	TXK	chr4	48066393	48134250	protein_coding	-	67857	39.149	0.0484555	0.893984	1
ENSG00000075035.10	WSCD2	chr12	108129288	108250537	protein_coding	+	121249	1.51655	-1.14855	0.434098	1
ENSG00000075043.20	KCNQ2	chr20	63400208	63472677	protein_coding	-	72469	0.129881	0.605697	0.885497	1
ENSG00000075073.16	TACR2	chr10	69403903	69416918	protein_coding	-	13015	12.4886	-0.022648	0.960069	1
ENSG00000075089.10	ACTR6	chr12	100199122	100241865	protein_coding	+	42743	453.979	0.14274	0.186539	0.783029
ENSG00000075131.10	TIPIN	chr15	66336191	66386746	protein_coding	-	50555	109.402	-0.479432	0.0105073	0.12209
ENSG00000075142.14	SRI	chr7	88205115	88226993	protein_coding	-	21878	518.817	-0.155028	0.411685	1
ENSG00000075151.24	EIF4G3	chr1	20806292	21177285	protein_coding	-	370993	1515.46	-0.161633	0.278123	0.967691
ENSG00000075188.9	NUP37	chr12	102073103	102120120	protein_coding	-	47017	238.573	-0.452149	0.0123136	0.136329
ENSG00000075213.11	SEMA3A	chr7	83955777	84492724	protein_coding	-	536947	0.304333	0.245026	0.953546	1
ENSG00000075218.19	GTSE1	chr22	46296870	46330810	protein_coding	+	33940	4.5467	0.159423	0.773658	1
ENSG00000075223.14	SEMA3C	chr7	80742538	80922359	protein_coding	-	179821	0.0645977	0	1	1
ENSG00000075234.17	TTC38	chr22	46267961	46294008	protein_coding	+	26047	257.247	0.161783	0.366613	1
ENSG00000075239.14	ACAT1	chr11	108116695	108147603	protein_coding	+	30908	373.715	-0.427303	0.0307876	0.257427
ENSG00000075240.17	GRAMD4	chr22	46576012	46679790	protein_coding	+	103778	570.429	-0.0136769	0.972272	1
ENSG00000075275.18	CELSR1	chr22	46360834	46537620	protein_coding	-	176786	5542.18	0.400008	0.000580789	0.0142481
ENSG00000075290.8	WNT8B	chr10	100463009	100483744	protein_coding	+	20735	3.70741	0.0331236	0.965393	1
ENSG00000075292.19	ZNF638	chr2	71276561	71435069	protein_coding	+	158508	2343.12	0.113241	0.121301	0.611623
ENSG00000075303.13	SLC25A40	chr7	87833568	87876360	protein_coding	-	42792	597.476	0.280971	0.000175796	0.00575354
ENSG00000075336.12	TIMM21	chr18	74148523	74160531	protein_coding	+	12008	304.592	-0.151967	0.315361	1
ENSG00000075340.23	ADD2	chr2	70607618	70768225	protein_coding	-	160607	9.53567	0.597552	0.810706	1
ENSG00000075388.4	FGF4	chr11	69771022	69775341	protein_coding	-	4319	0	NA	NA	NA
ENSG00000075391.17	RASAL2	chr1	178094104	178484147	protein_coding	+	390043	224.941	0.641646	0.522259	1
ENSG00000075399.14	VPS9D1	chr16	89707134	89720898	protein_coding	-	13764	317.137	-0.0706563	0.725594	1
ENSG00000075407.19	ZNF37A	chr10	38094334	38150293	protein_coding	+	55959	625.522	0.0466312	0.778171	1
ENSG00000075413.19	MARK3	chr14	103385377	103503831	protein_coding	+	118454	1534.7	-0.0794537	0.152208	0.696312
ENSG00000075415.15	SLC25A3	chr12	98593591	98606379	protein_coding	+	12788	4651.22	-0.567694	3.05506e-05	0.00154042
ENSG00000075420.13	FNDC3B	chr3	172039578	172401669	protein_coding	+	362091	72.1139	-0.939693	0.00355794	0.0555097
ENSG00000075426.12	FOSL2	chr2	28392448	28417317	protein_coding	+	24869	23.7402	-2.94385	3.15516e-05	0.00157751
ENSG00000075429.9	CACNG5	chr17	66835117	66894751	protein_coding	+	59634	0.11054	0.245026	0.953546	1
ENSG00000075461.6	CACNG4	chr17	66964707	67033398	protein_coding	+	68691	0.254677	0.979	0.800596	1
ENSG00000075539.15	FRYL	chr4	48497357	48780322	protein_coding	-	282965	2486.92	-0.116007	0.539174	1
ENSG00000075568.17	TMEM131	chr2	97756333	97995948	protein_coding	-	239615	3765.17	-0.22603	0.0822168	0.483879
ENSG00000075618.18	FSCN1	chr7	5592816	5606655	protein_coding	+	13839	5.30066	-0.54679	0.438233	1
ENSG00000075624.17	ACTB	chr7	5526409	5563902	protein_coding	-	37493	42495.9	-0.813305	1.32512e-05	0.000820276
ENSG00000075643.6	MOCOS	chr18	36187497	36272157	protein_coding	+	84660	45.3935	-0.557463	0.653755	1
ENSG00000075651.17	PLD1	chr3	171600404	171810950	protein_coding	-	210546	10.2386	-1.78742	0.466675	1
ENSG00000075673.12	ATP12A	chr13	24680408	24712472	protein_coding	+	32064	0.129195	0	1	1
ENSG00000075702.19	WDR62	chr19	36054649	36105108	protein_coding	+	50459	83.8408	-0.118961	0.59354	1
ENSG00000075711.21	DLG1	chr3	197042560	197299330	protein_coding	-	256770	1362.56	-0.0203404	0.785474	1
ENSG00000075785.14	RAB7A	chr3	128693669	128825942	protein_coding	+	132273	2959.06	-0.399655	0.00074743	0.0172253
ENSG00000075790.12	BCAP29	chr7	107580246	107629170	protein_coding	+	48924	0	NA	NA	NA
ENSG00000075826.17	SEC31B	chr10	100486646	100519864	protein_coding	-	33218	627.842	0.745318	0.0989321	0.541925
ENSG00000075856.12	SART3	chr12	108522214	108561400	protein_coding	-	39186	2340.02	-0.131795	0.236699	0.892932
ENSG00000075884.14	ARHGAP15	chr2	143091362	143768352	protein_coding	+	676990	1024.62	0.12979	0.276249	0.964416
ENSG00000075886.11	TUBA3D	chr2	131476119	131482934	protein_coding	+	6815	26.552	0.254579	0.27601	0.964261
ENSG00000075891.23	PAX2	chr10	100735396	100829944	protein_coding	+	94548	3.82358	1.03532	0.687831	1
ENSG00000075914.13	EXOSC7	chr3	44975241	45036066	protein_coding	+	60825	230.242	-0.409025	0.00212259	0.0375566
ENSG00000075945.13	KIFAP3	chr1	169921326	170085208	protein_coding	-	163882	268.296	-0.192453	0.14682	0.681479
ENSG00000075975.17	MKRN2	chr3	12557057	12586208	protein_coding	+	29151	2082.31	0.0227178	0.606049	1
ENSG00000076003.5	MCM6	chr2	135839626	135876443	protein_coding	-	36817	600.579	-0.400336	0.0379995	0.295514
ENSG00000076043.11	REXO2	chr11	114439435	114450279	protein_coding	+	10844	180.251	0.103521	0.691396	1
ENSG00000076053.12	RBM7	chr11	114400030	114414203	protein_coding	+	14173	423.673	-0.256971	0.284901	0.978027
ENSG00000076067.13	RBMS2	chr12	56521820	56596193	protein_coding	+	74373	350.118	0.474057	0.0223122	0.205424
ENSG00000076108.12	BAZ2A	chr12	56595596	56636816	protein_coding	-	41220	8479.2	0.600332	0.000880011	0.0195028
ENSG00000076201.16	PTPN23	chr3	47381011	47413435	protein_coding	+	32424	2290.09	-0.0220557	0.868563	1
ENSG00000076242.16	MLH1	chr3	36993350	37050846	protein_coding	+	57496	750.906	-0.533282	2.13952e-05	0.00119623
ENSG00000076248.11	UNG	chr12	109097597	109110992	protein_coding	+	13395	442.501	0.259043	0.167163	0.738024
ENSG00000076258.10	FMO4	chr1	171314183	171342084	protein_coding	+	27901	121.547	-0.192301	0.501838	1
ENSG00000076321.11	KLHL20	chr1	173714941	173786692	protein_coding	+	71751	431.944	0.124037	0.141928	0.667562
ENSG00000076344.16	RGS11	chr16	268301	275980	protein_coding	-	7679	17.895	-0.366158	0.613098	1
ENSG00000076351.13	SLC46A1	chr17	28394642	28407197	protein_coding	-	12555	744.195	0.170358	0.341916	1
ENSG00000076356.7	PLXNA2	chr1	208022242	208244384	protein_coding	-	222142	2.02755	-1.95893	0.345163	1
ENSG00000076382.17	SPAG5	chr17	28577565	28599025	protein_coding	-	21460	120.844	0.176555	0.362662	1
ENSG00000076513.17	ANKRD13A	chr12	109999186	110039763	protein_coding	+	40577	4357.1	0.329627	0.0394205	0.303164
ENSG00000076554.16	TPD52	chr8	80034745	80231232	protein_coding	-	196487	1325.47	0.124214	0.72875	1
ENSG00000076555.16	ACACB	chr12	109116587	109268226	protein_coding	+	151639	566.503	0.995607	0.044976	0.33184
ENSG00000076604.16	TRAF4	chr17	28744011	28750956	protein_coding	+	6945	2551.79	-1.36197	2.80542e-06	0.00023865
ENSG00000076641.4	PAG1	chr8	80967810	81112068	protein_coding	-	144258	1.46745	1.04449	0.485625	1
ENSG00000076650.7	GPATCH1	chr19	33080899	33130542	protein_coding	+	49643	381.182	0.0967608	0.392484	1
ENSG00000076662.10	ICAM3	chr19	10333776	10339661	protein_coding	-	5885	3538.86	0.340819	0.00536457	0.0751428
ENSG00000076685.19	NT5C2	chr10	103087185	103277605	protein_coding	-	190420	2055.81	0.443807	0.00183609	0.0336911
ENSG00000076706.17	MCAM	chr11	119308529	119321521	protein_coding	-	12992	3.86493	0.108896	0.871606	1
ENSG00000076716.9	GPC4	chrX	133300103	133415489	protein_coding	-	115386	0	NA	NA	NA
ENSG00000076770.15	MBNL3	chrX	132369317	132489968	protein_coding	-	120651	2353.26	0.177219	0.351882	1
ENSG00000076826.10	CAMSAP3	chr19	7595863	7618304	protein_coding	+	22441	7.1601	-0.668727	0.277278	0.966498
ENSG00000076864.21	RAP1GAP	chr1	21596221	21669357	protein_coding	-	73136	17.3344	-2.50477	0.00132812	0.0267674
ENSG00000076924.12	XAB2	chr19	7619525	7629545	protein_coding	-	10020	1838.23	0.156216	0.133053	0.643797
ENSG00000076928.18	ARHGEF1	chr19	41883173	41930150	protein_coding	+	46977	9101.31	0.542735	0.00613953	0.0831354
ENSG00000076944.17	STXBP2	chr19	7636881	7647873	protein_coding	+	10992	1031.72	-0.0379777	0.79433	1
ENSG00000076984.18	MAP2K7	chr19	7903843	7914478	protein_coding	+	10635	1609.87	0.137012	0.197812	0.809525
ENSG00000077009.14	NMRK2	chr19	3933069	3942416	protein_coding	+	9347	0.089002	-0.476315	0.909837	1
ENSG00000077044.11	DGKD	chr2	233354494	233472104	protein_coding	+	117610	4906.95	0.400908	0.217879	0.853692
ENSG00000077063.11	CTTNBP2	chr7	117710651	117874139	protein_coding	-	163488	10.0377	-1.02206	0.748672	1
ENSG00000077080.10	ACTL6B	chr7	100643097	100656448	protein_coding	-	13351	1.47799	-1.07999	0.351185	1
ENSG00000077092.20	RARB	chr3	24687887	25597932	protein_coding	+	910045	6.67849	0.424646	0.379443	1
ENSG00000077097.16	TOP2B	chr3	25597984	25664907	protein_coding	-	66923	4194.66	0.01967	0.857274	1
ENSG00000077147.16	TM9SF3	chr10	96518110	96587452	protein_coding	-	69342	2623.16	-0.157869	0.0651886	0.421598
ENSG00000077150.20	NFKB2	chr10	102394110	102402524	protein_coding	+	8414	2388.02	-1.9462	1.26372e-27	8.76139e-24
ENSG00000077152.11	UBE2T	chr1	202331657	202341980	protein_coding	-	10323	94.1899	0.172447	0.426721	1
ENSG00000077157.22	PPP1R12B	chr1	202348699	202592706	protein_coding	+	244007	563.939	0.440924	6.40092e-05	0.00268955
ENSG00000077232.19	DNAJC10	chr2	182716255	182794464	protein_coding	+	78209	3295.27	-0.20457	0.236453	0.892396
ENSG00000077235.18	GTF3C1	chr16	27459555	27549913	protein_coding	-	90358	1799.7	-0.0512745	0.39714	1
ENSG00000077238.14	IL4R	chr16	27313668	27364778	protein_coding	+	51110	11600.4	0.378121	0.300768	1
ENSG00000077254.14	USP33	chr1	77695987	77759852	protein_coding	-	63865	1410.68	0.15152	0.0328126	0.268057
ENSG00000077264.16	PAK3	chrX	110944285	111227361	protein_coding	+	283076	0.0373115	0	1	1
ENSG00000077274.9	CAPN6	chrX	111245099	111270483	protein_coding	-	25384	0	NA	NA	NA
ENSG00000077279.20	DCX	chrX	111293779	111412429	protein_coding	-	118650	0.0645977	0	1	1
ENSG00000077312.9	SNRPA	chr19	40750637	40765389	protein_coding	+	14752	979.779	-0.261568	0.0959658	0.531981
ENSG00000077327.16	SPAG6	chr10	22345445	22454224	protein_coding	+	108779	0.165792	-0.476315	0.909837	1
ENSG00000077348.10	EXOSC5	chr19	41386371	41397362	protein_coding	-	10991	207.176	-1.12024	1.7918e-07	2.71038e-05
ENSG00000077380.16	DYNC1I2	chr2	171687409	171750158	protein_coding	+	62749	1007.09	-0.291248	0.0376774	0.294053
ENSG00000077420.16	APBB1IP	chr10	26438341	26567803	protein_coding	+	129462	2359.17	0.462571	0.000356259	0.00976905
ENSG00000077454.17	LRCH4	chr7	100574011	100586129	protein_coding	-	12118	960.707	0.521142	0.00169107	0.0316871
ENSG00000077458.13	FAM76B	chr11	95768953	95790409	protein_coding	-	21456	997.854	0.417746	0.0421505	0.317756
ENSG00000077463.15	SIRT6	chr19	4174109	4182566	protein_coding	-	8457	380.6	-0.231951	0.0695458	0.439358
ENSG00000077498.9	TYR	chr11	89177875	89295759	protein_coding	+	117884	0.0322989	0	1	1
ENSG00000077514.9	POLD3	chr11	74493851	74669117	protein_coding	+	175266	341.431	-0.30032	0.0063276	0.0849797
ENSG00000077522.15	ACTN2	chr1	236664141	236764631	protein_coding	+	100490	0.322989	0	1	1
ENSG00000077549.19	CAPZB	chr1	19338775	19485539	protein_coding	-	146764	2381.17	-0.28441	0.0482092	0.347316
ENSG00000077585.14	GPR137B	chr1	236142505	236221865	protein_coding	+	79360	169.854	-0.325454	0.34176	1
ENSG00000077616.11	NAALAD2	chr11	90131515	90192894	protein_coding	+	61379	0	NA	NA	NA
ENSG00000077684.16	JADE1	chr4	128809700	128875224	protein_coding	+	65524	1361.4	0.255116	0.0118843	0.132822
ENSG00000077713.19	SLC25A43	chrX	119399336	119454478	protein_coding	+	55142	311.613	-0.0308133	0.848858	1
ENSG00000077721.16	UBE2A	chrX	119574536	119591083	protein_coding	+	16547	1127.45	-0.222875	0.0851278	0.494712
ENSG00000077782.22	FGFR1	chr8	38400215	38468834	protein_coding	-	68619	146.846	-0.561948	0.572055	1
ENSG00000077800.13	FKBP6	chr7	73328161	73358637	protein_coding	+	30476	0.243256	-1.21583	0.673242	1
ENSG00000077935.17	SMC1B	chr22	45344063	45413619	protein_coding	-	69556	4.48082	-0.355891	0.560326	1
ENSG00000077942.19	FBLN1	chr22	45502238	45601135	protein_coding	+	98897	1.0306	1.71628	0.448377	1
ENSG00000077943.8	ITGA8	chr10	15513954	15719922	protein_coding	-	205968	0.129237	0	1	1
ENSG00000077984.6	CST7	chr20	24949269	24959928	protein_coding	+	10659	109.601	-4.06678	0.00296647	0.0483539
ENSG00000078018.21	MAP2	chr2	209424047	209734118	protein_coding	+	310071	1011.34	-1.41163	0.000367708	0.0100226
ENSG00000078043.16	PIAS2	chr18	46803218	46920160	protein_coding	-	116942	607.482	0.0288464	0.729566	1
ENSG00000078053.17	AMPH	chr7	38383704	38631420	protein_coding	-	247716	3.31664	0.905407	0.309483	1
ENSG00000078061.14	ARAF	chrX	47561205	47571908	protein_coding	+	10703	1790.34	-0.029315	0.788648	1
ENSG00000078070.14	MCCC1	chr3	183015218	183116075	protein_coding	-	100857	692.504	0.0424794	0.716657	1
ENSG00000078081.8	LAMP3	chr3	183122215	183163839	protein_coding	-	41624	0.41454	-1.90265	0.429916	1
ENSG00000078098.15	FAP	chr2	162170684	162245151	protein_coding	-	74467	0.390635	-0.0586807	0.985249	1
ENSG00000078114.19	NEBL	chr10	20779973	21293011	protein_coding	-	513038	0.193793	0	1	1
ENSG00000078124.13	ACER3	chr11	76860859	77026797	protein_coding	+	165938	222.97	0.087449	0.564494	1
ENSG00000078140.14	UBE2K	chr4	39698109	39782792	protein_coding	+	84683	1590.46	-0.301423	0.00119727	0.0247781
ENSG00000078142.14	PIK3C3	chr18	41955234	42087830	protein_coding	+	132596	982.737	0.0121726	0.878479	1
ENSG00000078177.14	N4BP2	chr4	40056850	40158252	protein_coding	+	101402	681.525	-0.0364115	0.821698	1
ENSG00000078237.7	TIGAR	chr12	4307763	4360028	protein_coding	+	52265	190.1	-0.15204	0.665903	1
ENSG00000078246.17	TULP3	chr12	2877223	2941138	protein_coding	+	63915	225.2	0.22509	0.181622	0.771661
ENSG00000078269.15	SYNJ2	chr6	157981863	158099176	protein_coding	+	117313	405.517	-0.698211	0.181223	0.770809
ENSG00000078295.17	ADCY2	chr5	7396138	7830081	protein_coding	+	433943	0.20054	-0.476315	0.909837	1
ENSG00000078304.19	PPP2R5C	chr14	101761798	101927989	protein_coding	+	166191	5352.39	-0.328174	0.018631	0.182312
ENSG00000078319.11	PMS2P1	chr7	100300024	100336307	transcribed_unprocessed_pseudogene	-	36283	680.908	-0.525324	8.84163e-07	9.57797e-05
ENSG00000078328.23	RBFOX1	chr16	5239802	7713340	protein_coding	+	2473538	0.412592	0.245028	0.928211	1
ENSG00000078369.18	GNB1	chr1	1785285	1891117	protein_coding	-	105832	6756.49	-0.091871	0.320944	1
ENSG00000078399.19	HOXA9	chr7	27162438	27175180	protein_coding	-	12742	0	NA	NA	NA
ENSG00000078401.7	EDN1	chr6	12290361	12297194	protein_coding	+	6833	22.0407	-0.0985443	0.82081	1
ENSG00000078403.17	MLLT10	chr10	21524646	21743630	protein_coding	+	218984	935.141	0.0109786	0.914101	1
ENSG00000078487.18	ZCWPW1	chr7	100400826	100428992	protein_coding	-	28166	407.279	0.064394	0.579733	1
ENSG00000078549.15	ADCYAP1R1	chr7	31052308	31111479	protein_coding	+	59171	0.183143	0	1	1
ENSG00000078579.9	FGF20	chr8	16992181	17002345	protein_coding	-	10164	1.83778	0.837561	0.643303	1
ENSG00000078589.13	P2RY10	chrX	78945332	78963727	protein_coding	+	18395	2902.73	-0.0700801	0.612813	1
ENSG00000078596.11	ITM2A	chrX	79360384	79367667	protein_coding	-	7283	653.663	-0.0969302	0.781696	1
ENSG00000078618.23	NRDC	chr1	51789191	51878805	protein_coding	-	89614	2369.1	-0.29984	0.00321166	0.0514039
ENSG00000078668.14	VDAC3	chr8	42391624	42405937	protein_coding	+	14313	973.135	-0.108363	0.399111	1
ENSG00000078674.19	PCM1	chr8	17922968	18029948	protein_coding	+	106980	4165.37	-0.174447	0.030866	0.257721
ENSG00000078687.17	TNRC6C	chr17	77959240	78108835	protein_coding	+	149595	838.355	0.221187	0.213009	0.843327
ENSG00000078699.22	CBFA2T2	chr20	33490075	33650036	protein_coding	+	159961	1331.69	0.304332	0.000160697	0.00536692
ENSG00000078725.13	BRINP1	chr9	119153458	119369435	protein_coding	-	215977	0	NA	NA	NA
ENSG00000078747.16	ITCH	chr20	34363241	34540748	protein_coding	+	177507	2468.14	0.0138179	0.903162	1
ENSG00000078795.17	PKD2L2	chr5	137887968	137942747	protein_coding	+	54779	437.401	0.022912	0.880967	1
ENSG00000078804.13	TP53INP2	chr20	34704339	34713439	protein_coding	+	9100	193.106	-0.203531	0.360618	1
ENSG00000078808.19	SDF4	chr1	1216909	1232067	protein_coding	-	15158	2465.12	-0.151849	0.107667	0.568793
ENSG00000078814.18	MYH7B	chr20	34955810	35002437	protein_coding	+	46627	136.59	0.514486	0.026661	0.232204
ENSG00000078898.7	BPIFB2	chr20	33007704	33023703	protein_coding	+	15999	0.0322989	0	1	1
ENSG00000078900.15	TP73	chr1	3652516	3736201	protein_coding	+	83685	191.272	-0.16658	0.842588	1
ENSG00000078902.16	TOLLIP	chr11	1274371	1309654	protein_coding	-	35283	1240.79	-0.210328	0.103787	0.557432
ENSG00000078967.13	UBE2D4	chr7	43926436	43956136	protein_coding	+	29700	314.174	-0.0651083	0.660855	1
ENSG00000079101.17	CLUL1	chr18	596988	650334	protein_coding	+	53346	0.0968966	0	1	1
ENSG00000079102.16	RUNX1T1	chr8	91954967	92103286	protein_coding	-	148319	0.0645977	0	1	1
ENSG00000079112.10	CDH17	chr8	94127162	94217303	protein_coding	-	90141	0.559313	1.78439	0.613377	1
ENSG00000079134.13	THOC1	chr18	214520	268050	protein_coding	-	53530	685.636	0.00204207	0.985057	1
ENSG00000079150.19	FKBP7	chr2	178463664	178478600	protein_coding	-	14936	43.6096	-0.186529	0.532503	1
ENSG00000079156.17	OSBPL6	chr2	178194481	178402893	protein_coding	+	208412	0.530851	-1.15876	0.693942	1
ENSG00000079215.15	SLC1A3	chr5	36596588	36688334	protein_coding	+	91746	6.87852	1.8876	0.0070333	0.091125
ENSG00000079246.16	XRCC5	chr2	216107464	216206303	protein_coding	+	98839	4308.01	-0.580906	0.000789412	0.0180033
ENSG00000079257.8	LXN	chr3	158645822	158672648	protein_coding	-	26826	198.294	-0.336576	0.0189052	0.183681
ENSG00000079263.19	SP140	chr2	230203110	230313215	protein_coding	+	110105	2182.04	0.124395	0.351367	1
ENSG00000079277.22	MKNK1	chr1	46557407	46616843	protein_coding	-	59436	829.255	0.349092	0.0225345	0.207021
ENSG00000079308.20	TNS1	chr2	217799588	218033982	protein_coding	-	234394	0.213901	-0.066344	0.986924	1
ENSG00000079313.15	REXO1	chr19	1815248	1848483	protein_coding	-	33235	1614.74	-0.0770684	0.400161	1
ENSG00000079332.15	SAR1A	chr10	70147289	70170523	protein_coding	-	23234	1067.25	-0.245534	0.0220858	0.204013
ENSG00000079335.20	CDC14A	chr1	100345001	100520277	protein_coding	+	175276	215.813	-0.0153935	0.907826	1
ENSG00000079337.16	RAPGEF3	chr12	47734363	47771040	protein_coding	-	36677	4139.51	1.00002	0.0112195	0.127481
ENSG00000079385.23	CEACAM1	chr19	42507304	42561234	protein_coding	-	53930	275.916	0.541777	0.380026	1
ENSG00000079387.14	SENP1	chr12	48042897	48106079	protein_coding	-	63182	570.528	-0.334022	0.0120985	0.134494
ENSG00000079393.21	DUSP13	chr10	75094432	75109221	protein_coding	-	14789	0.0253123	-0.476315	0.909837	1
ENSG00000079432.9	CIC	chr19	42268537	42295797	protein_coding	+	27260	5517.17	-0.250743	0.0992808	0.54312
ENSG00000079435.10	LIPE	chr19	42401514	42427388	protein_coding	-	25874	428.394	0.134047	0.254738	0.927899
ENSG00000079459.13	FDFT1	chr8	11795573	11839304	protein_coding	+	43731	33.7281	-0.249776	0.323642	1
ENSG00000079462.8	PAFAH1B3	chr19	42297033	42303546	protein_coding	-	6513	330.037	-0.482679	0.00285983	0.0471215
ENSG00000079482.14	OPHN1	chrX	67949349	68433913	protein_coding	-	484564	3.75029	-0.297134	0.822215	1
ENSG00000079557.5	AFM	chr4	73481745	73504001	protein_coding	+	22256	0	NA	NA	NA
ENSG00000079616.14	KIF22	chr16	29790727	29805385	protein_coding	+	14658	761.255	0.0964901	0.38712	1
ENSG00000079689.14	SCGN	chr6	25652201	25701783	protein_coding	+	49582	0.131582	0.95324	0.820634	1
ENSG00000079691.18	CARMIL1	chr6	25279078	25620530	protein_coding	+	341452	466.073	0.516206	0.698254	1
ENSG00000079739.17	PGM1	chr1	63593411	63660245	protein_coding	+	66834	630.793	-0.420444	0.0186072	0.182123
ENSG00000079785.16	DDX1	chr2	15591178	15634346	protein_coding	+	43168	1277.66	-0.444149	8.83385e-05	0.00341515
ENSG00000079805.19	DNM2	chr19	10718055	10833488	protein_coding	+	115433	4919.99	0.210298	0.0252375	0.223795
ENSG00000079819.19	EPB41L2	chr6	130839347	131063322	protein_coding	-	223975	158.063	0.0149383	0.989628	1
ENSG00000079841.19	RIMS1	chr6	71886550	72403145	protein_coding	+	516595	1.60711	0.910388	0.616768	1
ENSG00000079931.15	MOXD1	chr6	132296055	132401475	protein_coding	-	105420	6.95356	-0.0992722	0.918324	1
ENSG00000079950.14	STX7	chr6	132445867	132513198	protein_coding	-	67331	6135.5	0.589289	0.0118705	0.132703
ENSG00000079974.19	RABL2B	chr22	50767501	50783667	protein_coding	-	16166	636.316	0.217074	0.117319	0.598875
ENSG00000079999.14	KEAP1	chr19	10486125	10503558	protein_coding	-	17433	840.393	-0.975871	2.44438e-06	0.000215884
ENSG00000080007.8	DDX43	chr6	73394828	73417566	protein_coding	+	22738	110.363	0.851579	0.570082	1
ENSG00000080031.10	PTPRH	chr19	55181247	55209506	protein_coding	-	28259	0.610919	1.22499	0.490597	1
ENSG00000080166.16	DCT	chr13	94436811	94479682	protein_coding	-	42871	4.86137	0.484879	0.464774	1
ENSG00000080189.15	SLC35C2	chr20	46345980	46364458	protein_coding	-	18478	1098.33	-0.0201105	0.797853	1
ENSG00000080200.10	CRYBG3	chr3	97822011	97944984	protein_coding	+	122973	238.778	-0.399882	0.370622	1
ENSG00000080224.18	EPHA6	chr3	96814581	97761532	protein_coding	+	946951	0.168409	0.245026	0.953546	1
ENSG00000080293.10	SCTR	chr2	119439843	119525301	protein_coding	-	85458	0.45692	0.0524682	0.983146	1
ENSG00000080298.16	RFX3	chr9	3218297	3526004	protein_coding	-	307707	728.857	0.114933	0.687608	1
ENSG00000080345.18	RIF1	chr2	151409883	151508013	protein_coding	+	98130	1719.35	-0.139765	0.421253	1
ENSG00000080371.6	RAB21	chr12	71754863	71800286	protein_coding	+	45423	1183.84	-0.284558	0.0168531	0.16985
ENSG00000080493.18	SLC4A4	chr4	71062667	71572087	protein_coding	+	509420	0.100482	0.245026	0.953546	1
ENSG00000080503.24	SMARCA2	chr9	1980290	2193624	protein_coding	+	213334	2933.17	0.155408	0.122813	0.615736
ENSG00000080511.5	RDH8	chr19	10013249	10022279	protein_coding	+	9030	0.0645977	0	1	1
ENSG00000080546.14	SESN1	chr6	108984309	109094846	protein_coding	-	110537	838.664	-0.0435794	0.901768	1
ENSG00000080561.14	MID2	chrX	107825755	107931637	protein_coding	+	105882	368.018	-0.0900812	0.707271	1
ENSG00000080572.14	DNAAF6	chrX	107206611	107244247	protein_coding	+	37636	0	NA	NA	NA
ENSG00000080573.7	COL5A3	chr19	9959561	10010504	protein_coding	-	50943	0.472871	0.245026	0.952794	1
ENSG00000080603.17	SRCAP	chr16	30698209	30741409	protein_coding	+	43200	244.603	0.0646544	0.588488	1
ENSG00000080608.10	PUM3	chr9	2720469	2844095	protein_coding	-	123626	423.81	-1.09579	2.16473e-10	1.1256e-07
ENSG00000080618.17	CPB2	chr13	46053186	46105033	protein_coding	-	51847	1.33045	-1.24824	0.265981	0.94777
ENSG00000080644.16	CHRNA3	chr15	78593052	78621295	protein_coding	-	28243	3.3511	-0.128204	0.85589	1
ENSG00000080709.16	KCNN2	chr5	114055926	114496500	protein_coding	+	440574	0	NA	NA	NA
ENSG00000080802.20	CNOT4	chr7	135361795	135510127	protein_coding	-	148332	623.003	-0.191617	0.127903	0.630759
ENSG00000080815.19	PSEN1	chr14	73136418	73223691	protein_coding	+	87273	1301.72	0.273609	0.0040781	0.0613974
ENSG00000080819.9	CPOX	chr3	98579446	98593648	protein_coding	-	14202	302.063	-0.171442	0.148384	0.685688
ENSG00000080822.17	CLDND1	chr3	98497912	98523066	protein_coding	-	25154	631.517	0.269388	0.0556769	0.382702
ENSG00000080823.23	MOK	chr14	102224500	102305190	protein_coding	-	80690	21.93	0.662832	0.491174	1
ENSG00000080824.19	HSP90AA1	chr14	102080742	102139699	protein_coding	-	58957	10351.7	-0.787906	2.58504e-05	0.0013681
ENSG00000080839.12	RBL1	chr20	36996349	37095997	protein_coding	-	99648	552.209	0.32972	0.125518	0.623876
ENSG00000080845.19	DLGAP4	chr20	36306336	36528637	protein_coding	+	222301	3328.38	0.21993	0.475746	1
ENSG00000080854.16	IGSF9B	chr11	133896438	133956968	protein_coding	-	60530	0.38767	0	1	1
ENSG00000080910.13	CFHR2	chr1	196943738	196959622	protein_coding	+	15884	0	NA	NA	NA
ENSG00000080947.15	CROCCP3	chr1	16467436	16499257	transcribed_unprocessed_pseudogene	-	31821	311.676	0.543595	0.029689	0.250941
ENSG00000080986.13	NDC80	chr18	2571557	2616635	protein_coding	+	45078	28.3517	0.452434	0.204711	0.824895
ENSG00000081014.11	AP4E1	chr15	50908672	51005895	protein_coding	+	97223	671.619	-0.0540113	0.635297	1
ENSG00000081019.14	RSBN1	chr1	113761832	113812476	protein_coding	-	50644	1265.87	0.0912182	0.515338	1
ENSG00000081026.19	MAGI3	chr1	113390515	113685923	protein_coding	+	295408	28.527	-0.933463	0.00972354	0.115467
ENSG00000081041.9	CXCL2	chr4	74097040	74099196	protein_coding	-	2156	0.0968966	0	1	1
ENSG00000081051.8	AFP	chr4	73431138	73456174	protein_coding	+	25036	0.0392136	0.245026	0.953546	1
ENSG00000081052.14	COL4A4	chr2	227002714	227164453	protein_coding	-	161739	858.509	1.07406	0.0830668	0.48738
ENSG00000081059.20	TCF7	chr5	134114681	134151865	protein_coding	+	37184	2258.55	0.809612	0.0937968	0.525136
ENSG00000081087.15	OSTM1	chr6	108041409	108165854	protein_coding	-	124445	1113.55	-0.0206535	0.868143	1
ENSG00000081138.14	CDH7	chr18	65750252	65890337	protein_coding	+	140085	0.0322989	0	1	1
ENSG00000081148.12	IMPG2	chr3	101222546	101320575	protein_coding	-	98029	15.2616	1.19418	0.00602158	0.0821534
ENSG00000081154.12	PCNP	chr3	101574180	101594465	protein_coding	+	20285	2001.09	-0.0186625	0.845636	1
ENSG00000081177.19	EXD2	chr14	69191498	69244020	protein_coding	+	52522	280.477	0.122124	0.398912	1
ENSG00000081181.8	ARG2	chr14	67619920	67651708	protein_coding	+	31788	525.138	-0.251017	0.0994152	0.543569
ENSG00000081189.16	MEF2C	chr5	88717117	88904257	protein_coding	-	187140	4809.78	-0.251466	0.358587	1
ENSG00000081237.20	PTPRC	chr1	198638457	198757476	protein_coding	+	119019	10814.7	0.612695	5.30706e-05	0.00235606
ENSG00000081248.12	CACNA1S	chr1	201039512	201112451	protein_coding	-	72939	0.515399	0.605697	0.880757	1
ENSG00000081277.13	PKP1	chr1	201283452	201332993	protein_coding	+	49541	0.193793	0	1	1
ENSG00000081307.15	UBA5	chr3	132654446	132679794	protein_coding	+	25348	723.263	-0.0213504	0.829937	1
ENSG00000081320.11	STK17B	chr2	196133583	196176503	protein_coding	-	42920	2719.66	0.183382	0.492526	1
ENSG00000081377.17	CDC14B	chr9	96490241	96619843	protein_coding	-	129602	561.761	0.451398	0.00970053	0.115292
ENSG00000081386.13	ZNF510	chr9	96754553	96778129	protein_coding	-	23576	608.283	0.235599	0.0214616	0.199946
ENSG00000081479.15	LRP2	chr2	169127109	169362534	protein_coding	-	235425	0.29069	0	1	1
ENSG00000081665.14	ZNF506	chr19	19785839	19821751	protein_coding	-	35912	1176.78	0.379798	0.0371596	0.291159
ENSG00000081692.13	JMJD4	chr1	227730425	227735411	protein_coding	-	4986	441.741	-0.388088	0.00270353	0.0450386
ENSG00000081721.12	DUSP12	chr1	161749758	161757238	protein_coding	+	7480	359.019	-0.280282	0.00418878	0.0625655
ENSG00000081760.17	AACS	chr12	125065434	125143333	protein_coding	+	77899	534.865	0.341003	0.290167	0.986867
ENSG00000081791.9	DELE1	chr5	141923855	141942047	protein_coding	+	18192	1683.67	0.0982185	0.417287	1
ENSG00000081800.9	SLC13A1	chr7	123113531	123199972	protein_coding	-	86441	0	NA	NA	NA
ENSG00000081803.17	CADPS2	chr7	122318411	122886759	protein_coding	-	568348	0.322989	0	1	1
ENSG00000081818.4	PCDHB4	chr5	141121818	141125623	protein_coding	+	3805	0	NA	NA	NA
ENSG00000081842.18	PCDHA6	chr5	140827958	141012347	protein_coding	+	184389	0	NA	NA	NA
ENSG00000081853.15	PCDHGA2	chr5	141338760	141512975	protein_coding	+	174215	3.26517	0.137199	0.90884	1
ENSG00000081870.12	HSPB11	chr1	53916574	53945699	protein_coding	-	29125	280.731	0.0994334	0.344171	1
ENSG00000081913.14	PHLPP1	chr18	62715541	62980433	protein_coding	+	264892	57.0686	0.759206	0.554943	1
ENSG00000081923.15	ATP8B1	chr18	57646426	57803315	protein_coding	-	156889	174.318	-0.987542	0.000795022	0.0180816
ENSG00000081985.13	IL12RB2	chr1	67307364	67398724	protein_coding	+	91360	4.60882	-0.535191	0.359425	1
ENSG00000082014.17	SMARCD3	chr7	151238764	151277896	protein_coding	-	39132	112.389	0.107035	0.48871	1
ENSG00000082068.9	WDR70	chr5	37379285	37753435	protein_coding	+	374150	449.692	-0.20286	0.0242469	0.217798
ENSG00000082074.19	FYB1	chr5	39105252	39274528	protein_coding	-	169276	0.272713	0.245028	0.930935	1
ENSG00000082126.18	MPP4	chr2	201644870	201698694	protein_coding	-	53824	0.848295	0.673109	0.702841	1
ENSG00000082146.13	STRADB	chr2	201387858	201480846	protein_coding	+	92988	431.793	0.0871593	0.716658	1
ENSG00000082153.18	BZW1	chr2	200810594	200827338	protein_coding	+	16744	2000.61	-0.870373	2.39719e-06	0.000213073
ENSG00000082175.16	PGR	chr11	101029624	101129813	protein_coding	-	100189	0.129195	0	1	1
ENSG00000082196.21	C1QTNF3	chr5	34017858	34043213	protein_coding	-	25355	56.8628	0.32328	0.168247	0.740373
ENSG00000082212.13	ME2	chr18	50879080	50954257	protein_coding	+	75177	1091.22	-0.424022	0.0391149	0.301371
ENSG00000082213.18	C5orf22	chr5	31532287	31555053	protein_coding	+	22766	557.932	-0.334339	0.00471483	0.0680998
ENSG00000082258.13	CCNT2	chr2	134918235	134959342	protein_coding	+	41107	1789.4	0.133953	0.129295	0.634515
ENSG00000082269.17	FAM135A	chr6	70412941	70561174	protein_coding	+	148233	205.627	0.0898381	0.661113	1
ENSG00000082293.13	COL19A1	chr6	69866556	70212468	protein_coding	+	345912	530.563	-0.178946	0.528944	1
ENSG00000082397.18	EPB41L3	chr18	5392381	5630700	protein_coding	-	238319	0.097831	0	1	1
ENSG00000082438.18	COBLL1	chr2	164653624	164843679	protein_coding	-	190055	2931.61	0.591577	0.333953	1
ENSG00000082458.12	DLG3	chrX	70444835	70505490	protein_coding	+	60655	150.494	0.323854	0.10304	0.555215
ENSG00000082482.14	KCNK2	chr1	215005775	215237090	protein_coding	+	231315	0.0968966	0	1	1
ENSG00000082497.12	SERTAD4	chr1	210232796	210246631	protein_coding	+	13835	0	NA	NA	NA
ENSG00000082512.15	TRAF5	chr1	211326615	211374946	protein_coding	+	48331	2684.26	0.693169	8.6206e-06	0.000579321
ENSG00000082515.18	MRPL22	chr5	154941073	154969411	protein_coding	+	28338	248.32	-0.42241	0.0015108	0.0292716
ENSG00000082516.9	GEMIN5	chr5	154887411	154938211	protein_coding	-	50800	583.789	-0.582538	0.000616468	0.014865
ENSG00000082556.14	OPRK1	chr8	53225724	53251637	protein_coding	-	25913	0.0645977	0	1	1
ENSG00000082641.16	NFE2L1	chr17	48048329	48061545	protein_coding	+	13216	4965.93	-1.64594	2.37072e-09	7.35948e-07
ENSG00000082684.16	SEMA5B	chr3	122909082	123028605	protein_coding	-	119523	0.192904	0	1	1
ENSG00000082701.17	GSK3B	chr3	119821321	120094994	protein_coding	-	273673	1280.83	0.0150661	0.914225	1
ENSG00000082781.12	ITGB5	chr3	124761948	124901418	protein_coding	-	139470	44.3426	1.08081	0.00286591	0.0471769
ENSG00000082805.21	ERC1	chr12	990509	1495933	protein_coding	+	505424	802.25	0.0251425	0.893217	1
ENSG00000082898.19	XPO1	chr2	61476032	61538741	protein_coding	-	62709	4794.81	-0.464976	0.00162996	0.0308476
ENSG00000082929.8	LINC01587	chr4	5524569	5527801	lncRNA	+	3232	1.34844	-0.559138	0.606783	1
ENSG00000082996.20	RNF13	chr3	149812770	149962139	protein_coding	+	149369	1011.17	0.220564	0.0393881	0.303027
ENSG00000083067.24	TRPM3	chr9	70529060	71446904	protein_coding	-	917844	0.4268	0.245026	0.953546	1
ENSG00000083093.10	PALB2	chr16	23603160	23641310	protein_coding	-	38150	379.232	-0.302008	0.0339413	0.274527
ENSG00000083097.15	DOP1A	chr6	83067666	83171350	protein_coding	+	103684	1072.17	0.317129	0.0350374	0.280555
ENSG00000083099.11	LYRM2	chr6	89568144	89638749	protein_coding	-	70605	813.682	-0.0135441	0.887105	1
ENSG00000083123.15	BCKDHB	chr6	80106647	80346270	protein_coding	+	239623	265.068	-0.148705	0.32749	1
ENSG00000083168.11	KAT6A	chr8	41929479	42051994	protein_coding	-	122515	3283.98	0.180007	0.283361	0.975928
ENSG00000083223.18	TUT7	chr9	86287733	86354454	protein_coding	-	66721	1950.03	0.166461	0.0793837	0.474591
ENSG00000083290.20	ULK2	chr17	19770829	19867936	protein_coding	-	97107	134.431	-0.192382	0.774347	1
ENSG00000083307.12	GRHL2	chr8	101492439	101669726	protein_coding	+	177287	0	0	1	1
ENSG00000083312.19	TNPO1	chr5	72816312	72916733	protein_coding	+	100421	3048.21	-0.201496	0.16916	0.742661
ENSG00000083444.17	PLOD1	chr1	11934205	11975538	protein_coding	+	41333	257.586	-0.524555	0.0109853	0.126059
ENSG00000083454.22	P2RX5	chr17	3672199	3696240	protein_coding	-	24041	185.039	0.14833	0.631173	1
ENSG00000083457.12	ITGAE	chr17	3714628	3801188	protein_coding	-	86560	285.51	0.530351	0.0016399	0.0309233
ENSG00000083520.15	DIS3	chr13	72752169	72782096	protein_coding	-	29927	1579.73	-0.0595445	0.539676	1
ENSG00000083535.16	PIBF1	chr13	72782133	73016461	protein_coding	+	234328	260.473	-0.220272	0.193549	0.798441
ENSG00000083544.16	TDRD3	chr13	60396457	60573878	protein_coding	+	177421	307.051	-0.0979417	0.583414	1
ENSG00000083622.8	ENSG00000083622	chr7	117604791	117647415	lncRNA	-	42624	0	NA	NA	NA
ENSG00000083635.8	NUFIP1	chr13	44939249	44989471	protein_coding	-	50222	107.417	-0.785038	9.74378e-05	0.00363342
ENSG00000083642.19	PDS5B	chr13	32586452	32778019	protein_coding	+	191567	1174.86	0.172099	0.187239	0.784289
ENSG00000083720.13	OXCT1	chr5	41730065	41870425	protein_coding	-	140360	681.594	-0.278952	0.127827	0.630691
ENSG00000083750.13	RRAGB	chrX	55717749	55758774	protein_coding	+	41025	331.282	0.174673	0.174223	0.754538
ENSG00000083782.8	EPYC	chr12	90963682	91005026	protein_coding	-	41344	0	NA	NA	NA
ENSG00000083799.18	CYLD	chr16	50742050	50801935	protein_coding	+	59885	4378.94	-0.178202	0.24301	0.905552
ENSG00000083807.10	SLC27A5	chr19	58479512	58512413	protein_coding	-	32901	176.966	0.0110767	0.939626	1
ENSG00000083812.13	ZNF324	chr19	58467056	58475436	protein_coding	+	8380	248.623	0.150574	0.168162	0.740075
ENSG00000083814.13	ZNF671	chr19	57719751	57727624	protein_coding	-	7873	631.813	0.190288	0.0807571	0.479494
ENSG00000083817.9	ZNF416	chr19	57571566	57578911	protein_coding	-	7345	183.698	-0.135591	0.435895	1
ENSG00000083828.16	ZNF586	chr19	57769655	57819939	protein_coding	+	50284	562.18	0.13557	0.222808	0.865389
ENSG00000083838.17	ZNF446	chr19	58474017	58481230	protein_coding	+	7213	226.203	0.196329	0.107221	0.567998
ENSG00000083844.10	ZNF264	chr19	57191500	57222846	protein_coding	+	31346	993.904	0.285947	0.0127619	0.139924
ENSG00000083845.9	RPS5	chr19	58386400	58394806	protein_coding	+	8406	11501.9	-0.184982	0.0939281	0.525493
ENSG00000083857.15	FAT1	chr4	186587794	186726722	protein_coding	-	138928	0.226092	0	1	1
ENSG00000083896.13	YTHDC1	chr4	68310387	68350090	protein_coding	-	39703	0.676721	-0.869752	0.591787	1
ENSG00000083937.10	CHMP2B	chr3	87227271	87255556	protein_coding	+	28285	710.049	-0.332235	0.0170155	0.171115
ENSG00000084070.12	SMAP2	chr1	40344850	40423326	protein_coding	+	78476	6598.66	-0.449394	0.00024211	0.00734807
ENSG00000084072.17	PPIE	chr1	39692182	39763914	protein_coding	+	71732	933.65	0.112854	0.412419	1
ENSG00000084073.10	ZMPSTE24	chr1	40258041	40294180	protein_coding	+	36139	745.762	-0.514482	8.19447e-06	0.000556983
ENSG00000084090.14	STARD7	chr2	96184859	96208827	protein_coding	-	23968	6926.12	-0.249297	0.074568	0.457302
ENSG00000084092.7	NOA1	chr4	56963350	56977606	protein_coding	-	14256	631.534	-0.123325	0.247939	0.915882
ENSG00000084093.19	REST	chr4	56907876	56966808	protein_coding	+	58932	1237.08	-0.0671149	0.62155	1
ENSG00000084110.11	HAL	chr12	95972662	95996365	protein_coding	-	23703	45.7514	0.647332	0.0772676	0.466973
ENSG00000084112.15	SSH1	chr12	108778191	108857590	protein_coding	-	79399	1747.15	0.136966	0.540175	1
ENSG00000084207.18	GSTP1	chr11	67583742	67586656	protein_coding	+	2914	3722.62	-0.227074	0.302672	1
ENSG00000084234.18	APLP2	chr11	130068147	130144811	protein_coding	+	76664	3436.49	0.420643	0.0424055	0.318886
ENSG00000084444.14	FAM234B	chr12	13044381	13142521	protein_coding	+	98140	158.828	0.351495	0.0971905	0.5357
ENSG00000084453.17	SLCO1A2	chr12	21264600	21419594	protein_coding	-	154994	0	NA	NA	NA
ENSG00000084463.8	WBP11	chr12	14784582	14803486	protein_coding	-	18904	2336.71	-0.185479	0.11205	0.583217
ENSG00000084623.12	EIF3I	chr1	32221077	32245397	protein_coding	+	24320	2351.75	-0.507222	4.17397e-06	0.000325558
ENSG00000084628.10	NKAIN1	chr1	31179745	31239887	protein_coding	-	60142	0.0881327	-0.476315	0.909837	1
ENSG00000084636.18	COL16A1	chr1	31652263	31704319	protein_coding	-	52056	0.507193	0.745193	0.728914	1
ENSG00000084652.16	TXLNA	chr1	32179675	32198285	protein_coding	+	18610	2109.09	-0.385354	5.16386e-07	6.16081e-05
ENSG00000084674.15	APOB	chr2	21001429	21044073	protein_coding	-	42644	0.21807	1.3205	0.753117	1
ENSG00000084676.16	NCOA1	chr2	24491254	24770702	protein_coding	+	279448	1916.16	-0.145217	0.215236	0.84762
ENSG00000084693.16	AGBL5	chr2	27042364	27070622	protein_coding	+	28258	1047.61	0.0240143	0.775233	1
ENSG00000084710.14	EFR3B	chr2	25042076	25159135	protein_coding	+	117059	13.0315	-0.363233	0.663244	1
ENSG00000084731.15	KIF3C	chr2	25926598	25982749	protein_coding	-	56151	160.21	0.472635	0.140368	0.663752
ENSG00000084733.11	RAB10	chr2	26034084	26137454	protein_coding	+	103370	2248.52	-0.388057	0.00386803	0.0588093
ENSG00000084734.9	GCKR	chr2	27496839	27523684	protein_coding	+	26845	0.226092	0	1	1
ENSG00000084754.12	HADHA	chr2	26190635	26244672	protein_coding	-	54037	3442.61	-0.13224	0.187412	0.784625
ENSG00000084764.12	MAPRE3	chr2	26970637	27027219	protein_coding	+	56582	86.5461	0.248422	0.519397	1
ENSG00000084774.14	CAD	chr2	27217369	27243943	protein_coding	+	26574	1872.98	-0.715934	8.39182e-07	9.21063e-05
ENSG00000085063.17	CD59	chr11	33703010	33736479	protein_coding	-	33469	822.683	-0.108781	0.601435	1
ENSG00000085117.12	CD82	chr11	44564427	44620358	protein_coding	+	55931	3869.89	0.0905963	0.769117	1
ENSG00000085185.16	BCORL1	chrX	129981107	130058071	protein_coding	+	76964	401.425	0.239258	0.295452	0.996128
ENSG00000085224.23	ATRX	chrX	77504880	77786233	protein_coding	-	281353	2955.4	0.108911	0.421248	1
ENSG00000085231.14	AK6	chr5	69350984	69370013	protein_coding	-	19029	0.0314102	0	1	1
ENSG00000085265.12	FCN1	chr9	134903232	134917912	protein_coding	-	14680	0.29069	0	1	1
ENSG00000085274.16	MYNN	chr3	169773396	169789716	protein_coding	+	16320	709.776	-0.150089	0.0952873	0.529844
ENSG00000085276.19	MECOM	chr3	169083499	169663775	protein_coding	-	580276	0.171942	0.605697	0.885497	1
ENSG00000085365.18	SCAMP1	chr5	78360611	78480739	protein_coding	+	120128	484.645	0.366886	0.00292701	0.0479347
ENSG00000085377.15	PREP	chr6	105273218	105454062	protein_coding	-	180844	487.61	-0.436185	0.00274024	0.0455226
ENSG00000085382.12	HACE1	chr6	104728094	104859919	protein_coding	-	131825	378.051	-0.0207204	0.858178	1
ENSG00000085415.16	SEH1L	chr18	12947133	12987536	protein_coding	+	40403	864.635	-0.82729	3.8169e-07	4.826e-05
ENSG00000085433.17	WDR47	chr1	108970214	109042113	protein_coding	-	71899	286.768	0.268058	0.0500456	0.356228
ENSG00000085449.15	WDFY1	chr2	223855716	223945357	protein_coding	-	89641	1592.05	-0.508712	0.00126976	0.0259427
ENSG00000085465.13	OVGP1	chr1	111414319	111427735	protein_coding	-	13416	214.826	1.10291	4.3539e-05	0.00203498
ENSG00000085491.17	SLC25A24	chr1	108134043	108200849	protein_coding	-	66806	1.01672	1.35933	0.366983	1
ENSG00000085511.20	MAP3K4	chr6	160991727	161117385	protein_coding	+	125658	1147.28	0.0631775	0.434642	1
ENSG00000085514.16	PILRA	chr7	100367530	100400096	protein_coding	+	32566	18.8887	0.56555	0.185502	0.780856
ENSG00000085552.18	IGSF9	chr1	159927039	159945613	protein_coding	-	18574	1.79512	3.81004	0.0209493	0.196272
ENSG00000085563.15	ABCB1	chr7	87503017	87713323	protein_coding	-	210306	189.498	0.507348	0.421689	1
ENSG00000085644.14	ZNF213	chr16	3129777	3142804	protein_coding	+	13027	360.341	-0.348968	0.0733024	0.453418
ENSG00000085662.14	AKR1B1	chr7	134442356	134459284	protein_coding	-	16928	1418.99	-0.217992	0.0378493	0.294897
ENSG00000085719.13	CPNE3	chr8	86514435	86561498	protein_coding	+	47063	1679.74	0.185738	0.155352	0.705594
ENSG00000085721.13	RRN3	chr16	15060033	15094311	protein_coding	-	34278	3.27371	-1.00889	0.237807	0.895484
ENSG00000085733.16	CTTN	chr11	70398404	70436584	protein_coding	+	38180	0.0224872	0	1	1
ENSG00000085741.14	WNT11	chr11	76186325	76210736	protein_coding	-	24411	1.89402	-0.000316041	0.999806	1
ENSG00000085760.15	MTIF2	chr2	55236595	55269347	protein_coding	-	32752	844.716	-0.161153	0.238081	0.8961
ENSG00000085788.14	DDHD2	chr8	38225218	38275558	protein_coding	+	50340	1683.42	0.0821637	0.563949	1
ENSG00000085831.16	TTC39A	chr1	51287258	51345116	protein_coding	-	57858	1.33212	0.973117	0.400538	1
ENSG00000085832.17	EPS15	chr1	51354263	51519266	protein_coding	-	165003	2746.12	0.00373786	0.977804	1
ENSG00000085840.13	ORC1	chr1	52372829	52404423	protein_coding	-	31594	45.3774	0.450205	0.073048	0.45245
ENSG00000085871.9	MGST2	chr4	139665768	139740745	protein_coding	+	74977	61.2786	0.0568298	0.906819	1
ENSG00000085872.15	CHERP	chr19	16517894	16542437	protein_coding	-	24543	1892	-0.0227454	0.783843	1
ENSG00000085978.22	ATG16L1	chr2	233210051	233295674	protein_coding	+	85623	0.197441	-0.836986	0.837651	1
ENSG00000085982.15	USP40	chr2	233475520	233566782	protein_coding	-	91262	522.582	0.0802661	0.66502	1
ENSG00000085998.15	POMGNT1	chr1	46188683	46220305	protein_coding	-	31622	825.358	-0.0294816	0.802244	1
ENSG00000085999.13	RAD54L	chr1	46246461	46278480	protein_coding	+	32019	55.2565	-0.00882511	0.970521	1
ENSG00000086015.23	MAST2	chr1	45786987	46036122	protein_coding	+	249135	437.497	-0.0658808	0.72107	1
ENSG00000086061.16	DNAJA1	chr9	33025273	33039907	protein_coding	+	14634	2047.07	-0.692173	3.3892e-05	0.00167638
ENSG00000086062.13	B4GALT1	chr9	33104082	33167356	protein_coding	-	63274	4751.32	0.986309	6.59508e-05	0.00273824
ENSG00000086065.14	CHMP5	chr9	33264879	33282070	protein_coding	+	17191	532.639	-0.106259	0.448576	1
ENSG00000086102.19	NFX1	chr9	33290512	33371157	protein_coding	+	80645	2407.31	0.136297	0.152118	0.696289
ENSG00000086159.13	AQP6	chr12	49967194	49977139	protein_coding	+	9945	0.08991	-0.476315	0.909837	1
ENSG00000086189.11	DIMT1	chr5	62347284	62403943	protein_coding	-	56659	955.712	-0.184366	0.0689743	0.437377
ENSG00000086200.17	IPO11	chr5	62403972	62628582	protein_coding	+	224610	290.271	-0.517812	0.00270466	0.0450394
ENSG00000086205.18	FOLH1	chr11	49145092	49208638	protein_coding	-	63546	0.0322989	0	1	1
ENSG00000086232.13	EIF2AK1	chr7	6022247	6059175	protein_coding	-	36928	2621.34	0.0257655	0.782913	1
ENSG00000086288.12	NME8	chr7	37848597	37900397	protein_coding	+	51800	0.265561	0.605697	0.885497	1
ENSG00000086289.12	EPDR1	chr7	37683843	37951936	protein_coding	+	268093	1.77632	-0.0294441	0.987693	1
ENSG00000086300.16	SNX10	chr7	26291862	26374383	protein_coding	+	82521	1575	0.167795	0.161979	0.723225
ENSG00000086475.15	SEPHS1	chr10	13317428	13348298	protein_coding	-	30870	538.542	-0.41739	0.0039586	0.0599017
ENSG00000086504.18	MRPL28	chr16	366969	371289	protein_coding	-	4320	602.408	-0.34798	0.00301305	0.0488967
ENSG00000086506.3	HBQ1	chr16	180459	181179	protein_coding	+	720	0.694592	-0.0602339	0.968738	1
ENSG00000086544.3	ITPKC	chr19	40717112	40740860	protein_coding	+	23748	302.711	-0.334466	0.00799099	0.100033
ENSG00000086548.9	CEACAM6	chr19	41750977	41772211	protein_coding	+	21234	0	NA	NA	NA
ENSG00000086570.13	FAT2	chr5	151504092	151591331	protein_coding	-	87239	27.6722	-0.0999828	0.728314	1
ENSG00000086589.12	RBM22	chr5	150690792	150701077	protein_coding	-	10285	2036.77	0.0891702	0.163686	0.72765
ENSG00000086598.11	TMED2	chr12	123584533	123598582	protein_coding	+	14049	2364	-0.220658	0.223263	0.866431
ENSG00000086619.15	ERO1B	chr1	236214681	236282019	protein_coding	-	67338	556.799	0.677192	0.000538486	0.0134373
ENSG00000086666.19	ZFAND6	chr15	80059568	80138393	protein_coding	+	78825	697.996	0.277658	0.113659	0.58837
ENSG00000086696.11	HSD17B2	chr16	82035004	82098534	protein_coding	+	63530	0.20005	-0.476316	0.889569	1
ENSG00000086712.13	TXLNG	chrX	16786432	16844519	protein_coding	+	58087	751.306	-0.2389	0.26444	0.944746
ENSG00000086717.19	PPEF1	chrX	18675909	18827921	protein_coding	+	152012	4.36644	-1.08528	0.272798	0.959893
ENSG00000086730.17	LAT2	chr7	74199652	74229834	protein_coding	+	30182	1221.1	-0.107152	0.686997	1
ENSG00000086758.16	HUWE1	chrX	53532096	53686728	protein_coding	-	154632	5962.89	-0.344445	0.0146177	0.153591
ENSG00000086827.9	ZW10	chr11	113733187	113773735	protein_coding	-	40548	297.901	-0.233411	0.248671	0.917173
ENSG00000086848.15	ALG9	chr11	111782195	111871581	protein_coding	-	89386	102.634	-0.0351434	0.888565	1
ENSG00000086967.10	MYBPC2	chr19	50432892	50466321	protein_coding	+	33429	8.02504	-0.273875	0.76679	1
ENSG00000086991.13	NOX4	chr11	89324353	89498187	protein_coding	-	173834	0.0968966	0	1	1
ENSG00000087008.16	ACOX3	chr4	8366282	8440723	protein_coding	-	74441	339.72	-0.0828726	0.579407	1
ENSG00000087053.20	MTMR2	chr11	95821766	95925315	protein_coding	-	103549	958.119	-0.0650602	0.651385	1
ENSG00000087074.8	PPP1R15A	chr19	48872421	48876058	protein_coding	+	3637	5715.75	-0.497106	0.217578	0.853051
ENSG00000087076.9	HSD17B14	chr19	48813018	48836510	protein_coding	-	23492	22.9949	-0.38924	0.468702	1
ENSG00000087077.14	TRIP6	chr7	100867387	100873454	protein_coding	+	6067	170.201	-0.564342	0.0987516	0.541293
ENSG00000087085.16	ACHE	chr7	100889994	100896974	protein_coding	-	6980	0.323757	-0.115645	0.966215	1
ENSG00000087086.15	FTL	chr19	48965309	48966879	protein_coding	+	1570	16844.7	-0.847025	1.15462e-06	0.0001183
ENSG00000087087.20	SRRT	chr7	100875103	100888664	protein_coding	+	13561	3368.95	-0.219191	0.017267	0.172869
ENSG00000087088.21	BAX	chr19	48954815	48961798	protein_coding	+	6983	1316.97	-0.194361	0.14324	0.671313
ENSG00000087095.13	NLK	chr17	28041737	28196381	protein_coding	+	154644	343.634	-0.0380732	0.707045	1
ENSG00000087111.21	PIGS	chr17	28553383	28571794	protein_coding	-	18411	941.497	-0.0350581	0.748137	1
ENSG00000087116.16	ADAMTS2	chr5	179110853	179345461	protein_coding	-	234608	0.653473	-1.05611	0.75534	1
ENSG00000087128.10	TMPRSS11E	chr4	68447463	68497604	protein_coding	+	50141	0	NA	NA	NA
ENSG00000087152.16	ATXN7L3	chr17	44191805	44200113	protein_coding	-	8308	2340.48	0.056534	0.504236	1
ENSG00000087157.19	PGS1	chr17	78378649	78425114	protein_coding	+	46465	1050.33	0.203913	0.0453758	0.333804
ENSG00000087191.13	PSMC5	chr17	63827152	63832026	protein_coding	+	4874	1968.35	-0.472685	7.62597e-05	0.00306445
ENSG00000087206.17	UIMC1	chr5	176905005	177022633	protein_coding	-	117628	1094.93	0.603968	2.76956e-07	3.89216e-05
ENSG00000087237.12	CETP	chr16	56961923	56983845	protein_coding	+	21922	43.5552	0.638501	0.0462988	0.338163
ENSG00000087245.13	MMP2	chr16	55389700	55506691	protein_coding	+	116991	0.237133	-0.476315	0.909837	1
ENSG00000087250.9	MT3	chr16	56589074	56591088	protein_coding	+	2014	0	NA	NA	NA
ENSG00000087253.13	LPCAT2	chr16	55509072	55586666	protein_coding	+	77594	0.0662387	0.605697	0.885497	1
ENSG00000087258.16	GNAO1	chr16	56191390	56357444	protein_coding	+	166054	2742.22	0.470055	0.624438	1
ENSG00000087263.17	OGFOD1	chr16	56451521	56479104	protein_coding	+	27583	781.955	-0.371515	4.91237e-05	0.00223328
ENSG00000087266.17	SH3BP2	chr4	2793071	2841098	protein_coding	+	48027	3117.41	-0.659923	0.000499537	0.0127327
ENSG00000087269.16	NOP14	chr4	2937933	2963406	protein_coding	-	25473	1231.71	-0.701451	1.17766e-08	2.98709e-06
ENSG00000087274.19	ADD1	chr4	2843844	2930076	protein_coding	+	86232	6134.85	0.340775	0.0248307	0.221369
ENSG00000087299.12	L2HGDH	chr14	50237563	50312229	protein_coding	-	74666	169.696	-0.121428	0.336555	1
ENSG00000087301.9	TXNDC16	chr14	52430596	52552522	protein_coding	-	121926	130.176	0.732742	0.00100743	0.0216051
ENSG00000087302.9	RTRAF	chr14	51989514	52010694	protein_coding	+	21180	888.587	-0.405729	0.000391359	0.0105235
ENSG00000087303.19	NID2	chr14	52004809	52069059	protein_coding	-	64250	57.372	0.053626	0.778735	1
ENSG00000087338.5	GMCL1	chr2	69829660	69881384	protein_coding	+	51724	614.06	0.267055	0.107818	0.568949
ENSG00000087365.16	SF3B2	chr11	66050729	66069308	protein_coding	+	18579	4870.27	-0.1428	0.0547662	0.378119
ENSG00000087448.11	KLHL42	chr12	27780048	27803040	protein_coding	+	22992	297.321	-0.284661	0.214355	0.845431
ENSG00000087460.29	GNAS	chr20	58839718	58911192	protein_coding	+	71474	18346.6	-0.292606	0.000178064	0.00579585
ENSG00000087470.19	DNM1L	chr12	32679200	32745650	protein_coding	+	66450	1347.06	-0.261629	0.147205	0.682732
ENSG00000087494.16	PTHLH	chr12	27958084	27972733	protein_coding	-	14649	0.264263	0.567207	0.842717	1
ENSG00000087495.17	PHACTR3	chr20	59577509	59847711	protein_coding	+	270202	0.776187	2.20112	0.257092	0.932511
ENSG00000087502.19	ERGIC2	chr12	29337352	29381189	protein_coding	-	43837	546.678	-0.213376	0.0663489	0.425917
ENSG00000087510.7	TFAP2C	chr20	56629306	56639283	protein_coding	+	9977	0.203818	0	1	1
ENSG00000087586.18	AURKA	chr20	56369389	56392337	protein_coding	-	22948	33.9788	-0.341077	0.138159	0.658171
ENSG00000087589.17	CASS4	chr20	56412112	56460387	protein_coding	+	48275	197.301	-0.362803	0.418497	1
ENSG00000087842.11	PIR	chrX	15384799	15493564	protein_coding	-	108765	2.52609	-4.56892	0.000362722	0.00991351
ENSG00000087884.15	AAMDC	chr11	77821109	77918432	protein_coding	+	97323	59.756	0.181874	0.31879	1
ENSG00000087903.13	RFX2	chr19	5993164	6199572	protein_coding	-	206408	12.4786	0.686258	0.0961866	0.532608
ENSG00000087995.16	METTL2A	chr17	62423875	62453385	protein_coding	+	29510	342.344	-0.421354	0.00110512	0.0231942
ENSG00000088002.12	SULT2B1	chr19	48552172	48599425	protein_coding	+	47253	0.27143	0.953237	0.820635	1
ENSG00000088035.18	ALG6	chr1	63367575	63438553	protein_coding	+	70978	353.812	0.124516	0.189022	0.788702
ENSG00000088038.19	CNOT3	chr19	54137749	54155681	protein_coding	+	17932	222.519	-0.113834	0.49339	1
ENSG00000088053.11	GP6	chr19	55013705	55038264	protein_coding	-	24559	0	NA	NA	NA
ENSG00000088179.9	PTPN4	chr2	119759922	119984899	protein_coding	+	224977	612.595	0.321138	0.0252816	0.223892
ENSG00000088205.13	DDX18	chr2	117814691	117832377	protein_coding	+	17686	2209.05	-0.421445	1.6938e-05	0.00099518
ENSG00000088247.19	KHSRP	chr19	6413102	6424811	protein_coding	-	11709	3552.92	-0.218772	0.0176076	0.175309
ENSG00000088256.9	GNA11	chr19	3094362	3123999	protein_coding	+	29637	239.05	0.496352	0.0252448	0.223795
ENSG00000088280.20	ASAP3	chr1	23428563	23484568	protein_coding	-	56005	0.0332333	0	1	1
ENSG00000088298.13	EDEM2	chr20	35115364	35147336	protein_coding	-	31972	632.373	0.189476	0.0472262	0.342323
ENSG00000088305.18	DNMT3B	chr20	32762385	32809356	protein_coding	+	46971	3.83289	-0.0531291	0.941995	1
ENSG00000088320.4	REM1	chr20	31475288	31484895	protein_coding	+	9607	3.52607	1.00759	0.537709	1
ENSG00000088325.16	TPX2	chr20	31739271	31801805	protein_coding	+	62534	12.054	-0.649513	0.131892	0.641463
ENSG00000088340.17	FER1L4	chr20	35558737	35607562	transcribed_unitary_pseudogene	-	48825	50.1248	1.5766	0.0131282	0.142661
ENSG00000088356.6	PDRG1	chr20	31944337	31952046	protein_coding	-	7709	328.006	-0.227458	0.0647229	0.419543
ENSG00000088367.23	EPB41L1	chr20	36091504	36232799	protein_coding	+	141295	14.0088	-0.453536	0.639371	1
ENSG00000088386.17	SLC15A1	chr13	98683801	98752672	protein_coding	-	68871	0.322989	0	1	1
ENSG00000088387.21	DOCK9	chr13	98793429	99086625	protein_coding	-	293196	636.309	0.463763	0.000288807	0.00840125
ENSG00000088448.14	ANKRD10	chr13	110878540	110915069	protein_coding	-	36529	2447.99	0.236271	0.0176256	0.175429
ENSG00000088451.11	TGDS	chr13	94574054	94596242	protein_coding	-	22188	240.368	-0.0747719	0.460043	1
ENSG00000088538.13	DOCK3	chr3	50674927	51384198	protein_coding	+	709271	10.5383	-1.22637	0.0462953	0.338163
ENSG00000088543.15	C3orf18	chr3	50558025	50571027	protein_coding	-	13002	213.937	0.101984	0.426742	1
ENSG00000088682.14	COQ9	chr16	57447425	57461270	protein_coding	+	13845	427.696	0.0346337	0.727112	1
ENSG00000088726.16	TMEM40	chr3	12733528	12769457	protein_coding	-	35929	0.12496	-0.836985	0.842268	1
ENSG00000088727.14	KIF9	chr3	47227998	47283451	protein_coding	-	55453	107.631	-0.499241	0.0148879	0.155498
ENSG00000088756.13	ARHGAP28	chr18	6729716	6915716	protein_coding	+	186000	0.0322989	0	1	1
ENSG00000088766.12	CRLS1	chr20	6006093	6040053	protein_coding	+	33960	77.6258	-0.242698	0.197762	0.809458
ENSG00000088782.5	DEFB127	chr20	157454	159163	protein_coding	+	1709	0	NA	NA	NA
ENSG00000088808.18	PPP1R13B	chr14	103733195	103847575	protein_coding	-	114380	721.022	0.0501291	0.651556	1
ENSG00000088812.18	ATRN	chr20	3471018	3651118	protein_coding	+	180100	873.011	-0.0660884	0.609202	1
ENSG00000088826.18	SMOX	chr20	4120980	4187747	protein_coding	+	66767	0.297649	-0.818747	0.675039	1
ENSG00000088827.13	SIGLEC1	chr20	3686970	3712600	protein_coding	-	25630	0.214488	-0.115644	0.977212	1
ENSG00000088832.18	FKBP1A	chr20	1368977	1393164	protein_coding	-	24187	1244.72	-0.288927	0.0365068	0.287888
ENSG00000088833.18	NSFL1C	chr20	1442162	1473842	protein_coding	-	31680	1177.22	-0.377108	0.00247029	0.0420799
ENSG00000088836.14	SLC4A11	chr20	3227417	3239559	protein_coding	-	12142	8.94791	-0.447365	0.39448	1
ENSG00000088854.13	DNAAF9	chr20	3249306	3407669	protein_coding	-	158363	438.146	0.394691	0.503097	1
ENSG00000088876.13	ZNF343	chr20	2481817	2524702	protein_coding	-	42885	206.37	0.170605	0.193191	0.79762
ENSG00000088881.21	EBF4	chr20	2692874	2760108	protein_coding	+	67234	49.8089	0.210653	0.842168	1
ENSG00000088882.8	CPXM1	chr20	2794074	2800627	protein_coding	-	6553	1.14675	1.00896	0.641565	1
ENSG00000088888.18	MAVS	chr20	3846799	3876123	protein_coding	+	29324	3627.88	0.248913	0.00437452	0.0645801
ENSG00000088899.16	LZTS3	chr20	3162617	3173549	protein_coding	-	10932	136.103	-0.215646	0.63591	1
ENSG00000088926.14	F11	chr4	186266189	186289681	protein_coding	+	23492	0.523452	-0.368104	0.842524	1
ENSG00000088930.8	XRN2	chr20	21303331	21389825	protein_coding	+	86494	1629.2	-0.356583	0.000161404	0.00537595
ENSG00000088970.16	KIZ	chr20	21125983	21246622	protein_coding	+	120639	509.59	0.737822	9.03627e-06	0.000597412
ENSG00000088986.11	DYNLL1	chr12	120469850	120498493	protein_coding	+	28643	1373.77	-0.240209	0.187998	0.786085
ENSG00000088992.18	TESC	chr12	117038923	117099479	protein_coding	-	60556	515.173	0.192159	0.740761	1
ENSG00000089006.17	SNX5	chr20	17941597	17968980	protein_coding	-	27383	1844.84	-0.478081	1.41124e-08	3.47365e-06
ENSG00000089009.16	RPL6	chr12	112405189	112418838	protein_coding	-	13649	18511.5	-0.148904	0.181856	0.772079
ENSG00000089012.14	SIRPG	chr20	1629152	1657779	protein_coding	-	28627	0.0322989	0	1	1
ENSG00000089022.14	MAPKAPK5	chr12	111842228	111902222	protein_coding	+	59994	1011.37	-0.212392	0.18155	0.771661
ENSG00000089041.17	P2RX7	chr12	121132819	121188032	protein_coding	+	55213	714.785	-0.770811	0.0995114	0.543928
ENSG00000089048.15	ESF1	chr20	13714322	13784919	protein_coding	-	70597	311.374	-0.623557	0.000605915	0.0146796
ENSG00000089050.16	RBBP9	chr20	18486540	18497225	protein_coding	-	10685	416.181	-0.174119	0.13018	0.636263
ENSG00000089053.13	ANAPC5	chr12	121308245	121399896	protein_coding	-	91651	3170.98	0.100824	0.446107	1
ENSG00000089057.15	SLC23A2	chr20	4852356	5010293	protein_coding	-	157937	5945.79	-0.593604	0.00077202	0.0177135
ENSG00000089060.12	SLC8B1	chr12	113298759	113359493	protein_coding	-	60734	496.819	0.622341	0.00382746	0.0583398
ENSG00000089063.15	TMEM230	chr20	5068232	5113103	protein_coding	-	44871	1595.42	-0.114826	0.149791	0.689576
ENSG00000089091.16	DZANK1	chr20	18383367	18467281	protein_coding	-	83914	124.386	0.117794	0.558238	1
ENSG00000089094.20	KDM2B	chr12	121429096	121581023	protein_coding	-	151927	2820.02	-0.0909748	0.581147	1
ENSG00000089101.19	CFAP61	chr20	20052514	20360703	protein_coding	+	308189	0.809591	2.47866	0.391072	1
ENSG00000089116.4	LHX5	chr12	113462033	113472280	protein_coding	-	10247	0.0508573	0	1	1
ENSG00000089123.16	TASP1	chr20	13389392	13638932	protein_coding	-	249540	136.326	-0.251812	0.0149454	0.15597
ENSG00000089127.15	OAS1	chr12	112905856	112933219	protein_coding	+	27363	1410.29	-0.39804	0.313526	1
ENSG00000089154.11	GCN1	chr12	120127202	120194715	protein_coding	-	67513	4471.89	-0.282828	0.00989247	0.116773
ENSG00000089157.16	RPLP0	chr12	120196699	120201235	protein_coding	-	4536	26898.5	-0.657919	0.000171024	0.00563283
ENSG00000089159.17	PXN	chr12	120210439	120265771	protein_coding	-	55332	492.955	0.272934	0.473112	1
ENSG00000089163.4	SIRT4	chr12	120302316	120313249	protein_coding	+	10933	30.1826	0.461444	0.0552145	0.380038
ENSG00000089169.15	RPH3A	chr12	112570380	112898881	protein_coding	+	328501	0.145705	-0.836985	0.842268	1
ENSG00000089177.19	KIF16B	chr20	16272104	16573448	protein_coding	-	301344	269.127	-0.14396	0.454714	1
ENSG00000089195.15	TRMT6	chr20	5937228	5950558	protein_coding	-	13330	460.552	-0.299368	0.00445413	0.0653095
ENSG00000089199.10	CHGB	chr20	5911510	5925353	protein_coding	+	13843	2.90878	1.1267	0.403806	1
ENSG00000089220.5	PEBP1	chr12	118136124	118145584	protein_coding	+	9460	3102.34	-0.0157097	0.932324	1
ENSG00000089225.20	TBX5	chr12	114353911	114408442	protein_coding	-	54531	0.0645977	0	1	1
ENSG00000089234.16	BRAP	chr12	111642146	111685956	protein_coding	-	43810	631.228	-0.103552	0.435076	1
ENSG00000089248.7	ERP29	chr12	112013348	112023449	protein_coding	+	10101	3497.75	0.133526	0.394196	1
ENSG00000089250.20	NOS1	chr12	117208142	117452170	protein_coding	-	244028	1.10194	-0.132127	0.944554	1
ENSG00000089280.19	FUS	chr16	31180138	31191605	protein_coding	+	11467	7538.23	-0.430924	0.00338681	0.0533855
ENSG00000089289.16	IGBP1	chrX	70133447	70166324	protein_coding	+	32877	978.201	0.182276	0.177933	0.763204
ENSG00000089327.15	FXYD5	chr19	35154730	35169881	protein_coding	+	15151	3092.26	0.183605	0.273584	0.961194
ENSG00000089335.22	ZNF302	chr19	34677639	34686397	protein_coding	+	8758	831.425	0.128998	0.382206	1
ENSG00000089351.15	GRAMD1A	chr19	34994784	35026471	protein_coding	+	31687	994.803	0.221623	0.0943707	0.527001
ENSG00000089356.19	FXYD3	chr19	35115823	35124324	protein_coding	+	8501	0.0446563	0.605697	0.885497	1
ENSG00000089472.18	HEPH	chrX	66162671	66268867	protein_coding	+	106196	1.14555	-2.01079	0.290368	0.987228
ENSG00000089486.17	CDIP1	chr16	4510669	4538828	protein_coding	-	28159	89.3815	0.221752	0.240318	0.900948
ENSG00000089505.18	CMTM1	chr16	66566393	66579137	protein_coding	+	12744	16.4041	0.299602	0.43399	1
ENSG00000089558.9	KCNH4	chr17	42156891	42181142	protein_coding	-	24251	6.99208	-1.0403	0.071942	0.448336
ENSG00000089597.18	GANAB	chr11	62624826	62646726	protein_coding	-	21900	6028.92	-0.151695	0.112747	0.58545
ENSG00000089639.11	GMIP	chr19	19629476	19643657	protein_coding	-	14181	3095.62	0.320097	0.00612297	0.0829922
ENSG00000089682.17	RBM41	chrX	107061885	107118823	protein_coding	-	56938	482.033	0.358551	0.0146629	0.153876
ENSG00000089685.15	BIRC5	chr17	78214186	78225636	protein_coding	+	11450	2.35006	0.614781	0.501656	1
ENSG00000089692.9	LAG3	chr12	6772512	6778455	protein_coding	+	5943	171.1	-0.283081	0.412212	1
ENSG00000089693.11	MLF2	chr12	6747996	6767475	protein_coding	-	19479	1880.98	-0.274065	0.191737	0.794649
ENSG00000089723.10	OTUB2	chr14	94026340	94048930	protein_coding	+	22590	0	NA	NA	NA
ENSG00000089737.18	DDX24	chr14	94048287	94081202	protein_coding	-	32915	0.244671	-0.115645	0.962404	1
ENSG00000089775.12	ZBTB25	chr14	64449106	64505213	protein_coding	-	56107	1058.16	-0.0513272	0.743155	1
ENSG00000089818.18	NECAP1	chr12	8076939	8097881	protein_coding	+	20942	589.566	-0.00964051	0.939949	1
ENSG00000089820.16	ARHGAP4	chrX	153907367	153934999	protein_coding	-	27632	3900.7	0.360389	0.0541484	0.374926
ENSG00000089847.13	ANKRD24	chr19	4182689	4224814	protein_coding	+	42125	7.58505	-0.836848	0.115391	0.593475
ENSG00000089876.12	DHX32	chr10	125836337	125896436	protein_coding	-	60099	439.758	-0.215431	0.298856	1
ENSG00000089902.10	RCOR1	chr14	102592649	102730561	protein_coding	+	137912	823.674	-0.0952514	0.599434	1
ENSG00000089916.18	GPATCH2L	chr14	76151916	76254342	protein_coding	+	102426	1294.66	0.102947	0.379108	1
ENSG00000090006.18	LTBP4	chr19	40592883	40629818	protein_coding	+	36935	1295.02	0.518635	0.0244076	0.218769
ENSG00000090013.11	BLVRB	chr19	40447765	40465764	protein_coding	-	17999	146.961	-0.202797	0.587969	1
ENSG00000090020.11	SLC9A1	chr1	27098809	27166981	protein_coding	-	68172	716.708	-0.99369	0.00102984	0.0219801
ENSG00000090054.16	SPTLC1	chr9	92000087	92115413	protein_coding	-	115326	1311.6	-0.0189102	0.792769	1
ENSG00000090060.19	PAPOLA	chr14	96501433	96567116	protein_coding	+	65683	4322.4	-0.0259115	0.81661	1
ENSG00000090061.17	CCNK	chr14	99481169	99535044	protein_coding	+	53875	1632.37	-0.158529	0.0599216	0.399971
ENSG00000090097.22	PCBP4	chr3	51957454	51974016	protein_coding	-	16562	406.531	0.292526	0.227248	0.87391
ENSG00000090104.12	RGS1	chr1	192575763	192580024	protein_coding	+	4261	25.9666	-3.54804	0.00663021	0.0875289
ENSG00000090238.12	YPEL3	chr16	30092314	30096915	protein_coding	-	4601	3341.32	1.00061	1.39894e-06	0.000137248
ENSG00000090263.16	MRPS33	chr7	141002610	141015228	protein_coding	-	12618	144.253	-0.48212	0.0423543	0.318725
ENSG00000090266.13	NDUFB2	chr7	140690777	140722790	protein_coding	+	32013	883.369	-0.311513	0.000251062	0.0075899
ENSG00000090273.14	NUDC	chr1	26900238	26946871	protein_coding	+	46633	1177.6	-0.38935	0.000340612	0.00940633
ENSG00000090316.16	MAEA	chr4	1289887	1340147	protein_coding	+	50260	1520.6	0.0872757	0.250751	0.920622
ENSG00000090339.9	ICAM1	chr19	10271093	10286615	protein_coding	+	15522	224.695	-1.60046	0.0164323	0.166517
ENSG00000090372.15	STRN4	chr19	46719511	46746994	protein_coding	-	27483	1546.09	-0.0571282	0.552894	1
ENSG00000090376.11	IRAK3	chr12	66189195	66254622	protein_coding	+	65427	0.251273	-1.24848	0.747044	1
ENSG00000090382.7	LYZ	chr12	69348381	69354234	protein_coding	+	5853	15.6811	1.92107	0.136161	0.65332
ENSG00000090402.8	SI	chr3	164978898	165078496	protein_coding	-	99598	0	NA	NA	NA
ENSG00000090432.7	MUL1	chr1	20499448	20508151	protein_coding	-	8703	485.436	-0.27901	0.00923162	0.110956
ENSG00000090447.12	TFAP4	chr16	4257186	4273075	protein_coding	-	15889	437.606	-0.00999559	0.954279	1
ENSG00000090470.15	PDCD7	chr15	65117379	65133808	protein_coding	-	16429	825.633	-0.0184304	0.83647	1
ENSG00000090487.11	SPG21	chr15	64963022	64990310	protein_coding	-	27288	1261.02	-0.386894	0.00437799	0.0645801
ENSG00000090512.12	FETUB	chr3	186635969	186653141	protein_coding	+	17172	0	NA	NA	NA
ENSG00000090520.12	DNAJB11	chr3	186567403	186585800	protein_coding	+	18397	580.065	-0.613619	0.00022278	0.00688501
ENSG00000090530.10	P3H2	chr3	189956728	190122437	protein_coding	-	165709	14.3041	-0.754985	0.67277	1
ENSG00000090534.20	THPO	chr3	184371935	184381968	protein_coding	-	10033	0.454444	-0.466074	0.845139	1
ENSG00000090539.15	CHRD	chr3	184380073	184390736	protein_coding	+	10663	0.484946	1.24495	0.654676	1
ENSG00000090554.13	FLT3LG	chr19	49474207	49486231	protein_coding	+	12024	12.6371	0.519627	0.19998	0.813254
ENSG00000090565.17	RAB11FIP3	chr16	425649	523011	protein_coding	+	97362	46.8133	0.386099	0.200824	0.815411
ENSG00000090581.11	GNPTG	chr16	1351931	1365737	protein_coding	+	13806	1625.34	0.21626	0.107784	0.568941
ENSG00000090612.22	ZNF268	chr12	133181409	133214832	protein_coding	+	33423	404.005	-0.239726	0.148281	0.68558
ENSG00000090615.16	GOLGA3	chr12	132768902	132829143	protein_coding	-	60241	2707.72	-0.0927613	0.631322	1
ENSG00000090621.15	PABPC4	chr1	39560709	39576790	protein_coding	-	16081	3639.82	-0.771386	1.09535e-07	1.86739e-05
ENSG00000090659.18	CD209	chr19	7739993	7747564	protein_coding	-	7571	0.236894	1.37444	0.728773	1
ENSG00000090661.12	CERS4	chr19	8206736	8262421	protein_coding	+	55685	402.744	0.368739	0.26629	0.948141
ENSG00000090674.16	MCOLN1	chr19	7522624	7534009	protein_coding	+	11385	257.438	-0.226262	0.206042	0.828102
ENSG00000090686.16	USP48	chr1	21678298	21783606	protein_coding	-	105308	2070.11	0.333597	0.00147418	0.0286823
ENSG00000090776.6	EFNB1	chrX	68829021	68842160	protein_coding	+	13139	105.761	-0.18527	0.320299	1
ENSG00000090857.14	PDPR	chr16	70114332	70162537	protein_coding	+	48205	1810.26	0.0458273	0.795172	1
ENSG00000090861.17	AARS1	chr16	70251983	70289707	protein_coding	-	37724	6665.67	-1.20706	2.43947e-05	0.00131617
ENSG00000090863.12	GLG1	chr16	74447427	74607144	protein_coding	-	159717	3710.36	0.141028	0.116034	0.595165
ENSG00000090889.12	KIF4A	chrX	70290104	70420886	protein_coding	+	130782	3.22639	0.183993	0.796131	1
ENSG00000090905.19	TNRC6A	chr16	24610209	24827632	protein_coding	+	217423	1026.59	0.172023	0.129304	0.634515
ENSG00000090924.15	PLEKHG2	chr19	39412669	39428415	protein_coding	+	15746	990.796	-0.218514	0.325868	1
ENSG00000090932.11	DLL3	chr19	39498895	39508481	protein_coding	+	9586	2.23567	-1.20267	0.23268	0.884241
ENSG00000090971.5	NAT14	chr19	55485188	55487568	protein_coding	+	2380	130.73	0.0592573	0.829856	1
ENSG00000090975.14	PITPNM2	chr12	122983480	123151090	protein_coding	-	167610	3910.99	0.451025	0.0057859	0.0795906
ENSG00000090989.18	EXOC1	chr4	55853648	55905086	protein_coding	+	51438	803.869	0.143579	0.0776362	0.468384
ENSG00000091009.8	RBM27	chr5	146203605	146289223	protein_coding	+	85618	532.818	-0.328977	0.0609731	0.404541
ENSG00000091010.6	POU4F3	chr5	146338839	146341728	protein_coding	+	2889	0.849848	-0.670265	0.649211	1
ENSG00000091039.17	OSBPL8	chr12	76351797	76559809	protein_coding	-	208012	2033.48	0.108298	0.546598	1
ENSG00000091073.20	DTX2	chr7	76461676	76505995	protein_coding	+	44319	258.141	0.0303792	0.74106	1
ENSG00000091106.19	NLRC4	chr2	32224453	32265732	protein_coding	-	41279	60.0285	0.340027	0.544631	1
ENSG00000091127.14	PUS7	chr7	105439661	105522271	protein_coding	-	82610	173.264	-1.48627	1.39423e-07	2.26552e-05
ENSG00000091128.13	LAMB4	chr7	108023548	108130361	protein_coding	-	106813	1.5678	-0.64199	0.76095	1
ENSG00000091129.22	NRCAM	chr7	108147623	108456717	protein_coding	-	309094	24.3701	-0.0257811	0.983211	1
ENSG00000091136.15	LAMB1	chr7	107923799	108003213	protein_coding	-	79414	18.4775	0.0849093	0.742507	1
ENSG00000091137.14	SLC26A4	chr7	107660828	107717809	protein_coding	+	56981	4.44502	1.25515	0.0394727	0.303276
ENSG00000091138.13	SLC26A3	chr7	107765467	107803225	protein_coding	-	37758	2.07806	-1.23424	0.167401	0.738547
ENSG00000091140.15	DLD	chr7	107891162	107931730	protein_coding	+	40568	681.279	-0.702194	1.20927e-05	0.000761019
ENSG00000091157.15	WDR7	chr18	56651343	57029811	protein_coding	+	378468	637.034	-0.335455	0.0257021	0.226483
ENSG00000091164.13	TXNL1	chr18	56597209	56651600	protein_coding	-	54391	866.807	-0.67807	8.79595e-06	0.000586369
ENSG00000091181.20	IL5RA	chr3	3066324	3126613	protein_coding	-	60289	2.42431	1.82231	0.419223	1
ENSG00000091262.17	ABCC6	chr16	16149565	16223522	protein_coding	-	73957	0.423557	0.569615	0.789253	1
ENSG00000091317.8	CMTM6	chr3	32481312	32502852	protein_coding	-	21540	2281.4	-0.157505	0.206668	0.828865
ENSG00000091409.16	ITGA6	chr2	172427354	172506459	protein_coding	+	79105	27.9469	1.01328	0.00146115	0.0286387
ENSG00000091428.18	RAPGEF4	chr2	172735274	173052893	protein_coding	+	317619	0.967348	1.82129	0.29487	0.995407
ENSG00000091436.17	MAP3K20	chr2	173075435	173268015	protein_coding	+	192580	153.896	0.17726	0.91199	1
ENSG00000091482.8	SMPX	chrX	21705978	21758116	protein_coding	-	52138	0	NA	NA	NA
ENSG00000091483.8	FH	chr1	241497511	241519799	protein_coding	-	22288	745.084	-0.531598	2.41611e-06	0.000213841
ENSG00000091490.11	SEL1L3	chr4	25747433	25863760	protein_coding	-	116327	6585.43	0.325333	0.124744	0.621599
ENSG00000091513.16	TF	chr3	133746040	133796641	protein_coding	+	50601	4.08018	0.635651	0.382151	1
ENSG00000091527.17	CDV3	chr3	133573686	133590261	protein_coding	+	16575	4547.74	-0.237483	0.0825428	0.485043
ENSG00000091536.20	MYO15A	chr17	18108756	18179802	protein_coding	+	71046	36.5842	0.594281	0.0166172	0.168022
ENSG00000091542.9	ALKBH5	chr17	18183078	18209954	protein_coding	+	26876	2984.05	0.157681	0.142654	0.669766
ENSG00000091583.11	APOH	chr17	66212033	66256525	protein_coding	-	44492	0.0762094	0.245026	0.953546	1
ENSG00000091592.16	NLRP1	chr17	5499427	5619424	protein_coding	-	119997	3833.23	0.921411	0.010802	0.124506
ENSG00000091622.16	PITPNM3	chr17	6451263	6556555	protein_coding	-	105292	12.448	0.111542	0.775966	1
ENSG00000091640.8	SPAG7	chr17	4959226	4967817	protein_coding	-	8591	608.891	-0.431008	0.00611866	0.0829609
ENSG00000091651.9	ORC6	chr16	46689643	46698394	protein_coding	+	8751	65.671	-0.322847	0.163086	0.726469
ENSG00000091656.19	ZFHX4	chr8	76681239	76867281	protein_coding	+	186042	0.866852	-0.0388116	0.979683	1
ENSG00000091664.9	SLC17A6	chr11	22338381	22379503	protein_coding	+	41122	0.0968966	0	1	1
ENSG00000091704.10	CPA1	chr7	130380339	130388114	protein_coding	+	7775	0.18411	0	1	1
ENSG00000091732.17	ZC3HC1	chr7	130018287	130051451	protein_coding	-	33164	278.519	-0.235168	0.0432468	0.323557
ENSG00000091831.25	ESR1	chr6	151656691	152129619	protein_coding	+	472928	168.844	-0.779133	0.0590277	0.396636
ENSG00000091844.8	RGS17	chr6	153004459	153131282	protein_coding	-	126823	29.8671	1.07712	0.0186631	0.182456
ENSG00000091879.14	ANGPT2	chr8	6499632	6563409	protein_coding	-	63777	26.8729	0.910051	0.0363321	0.287327
ENSG00000091947.10	TMEM101	chr17	44011188	44023946	protein_coding	-	12758	394.743	0.00929502	0.931556	1
ENSG00000091972.18	CD200	chr3	112332347	112362812	protein_coding	+	30465	2141.22	-0.778401	0.0101674	0.119105
ENSG00000091986.16	CCDC80	chr3	112596797	112649530	protein_coding	-	52733	21.3868	0.733103	0.2761	0.964351
ENSG00000092009.10	CMA1	chr14	24505353	24508265	protein_coding	-	2912	0.540906	1.40711	0.610493	1
ENSG00000092010.15	PSME1	chr14	24136163	24138967	protein_coding	+	2804	0.461938	-2.07148	0.331829	1
ENSG00000092020.11	PPP2R3C	chr14	35085467	35122517	protein_coding	-	37050	539.732	-0.205916	0.0312742	0.260002
ENSG00000092036.19	HAUS4	chr14	22946228	22957161	protein_coding	-	10933	235.179	0.1863	0.158536	0.714132
ENSG00000092051.18	JPH4	chr14	23568038	23578790	protein_coding	-	10752	0.874075	-1.27315	0.328714	1
ENSG00000092054.13	MYH7	chr14	23412740	23435660	protein_coding	-	22920	0.322989	0	1	1
ENSG00000092067.6	CEBPE	chr14	23117306	23119255	protein_coding	-	1949	8.75358	0.369119	0.549099	1
ENSG00000092068.21	SLC7A8	chr14	23125295	23183674	protein_coding	-	58379	23.9847	0.416492	0.709922	1
ENSG00000092094.11	OSGEP	chr14	20446401	20455089	protein_coding	-	8688	1270.27	0.128582	0.272284	0.959544
ENSG00000092096.19	SLC22A17	chr14	23346314	23352912	protein_coding	-	6598	35.4052	-1.48711	0.18543	0.780798
ENSG00000092098.17	RNF31	chr14	24146683	24160660	protein_coding	+	13977	0.0313685	0	1	1
ENSG00000092108.22	SCFD1	chr14	30622291	30737694	protein_coding	+	115403	927.972	-0.200462	0.0191404	0.184848
ENSG00000092140.16	G2E3	chr14	30559158	30620064	protein_coding	+	60906	523.116	0.128806	0.183676	0.7764
ENSG00000092148.14	HECTD1	chr14	31100117	31207804	protein_coding	-	107687	3277.92	-0.011745	0.932539	1
ENSG00000092199.19	HNRNPC	chr14	21209136	21269494	protein_coding	-	60358	8454.83	-0.382536	0.000768512	0.0176427
ENSG00000092200.13	RPGRIP1	chr14	21280083	21351301	protein_coding	+	71218	16.9988	0.990891	0.0921247	0.519691
ENSG00000092201.10	SUPT16H	chr14	21351476	21384019	protein_coding	-	32543	3044.86	-0.457372	0.000647319	0.0154399
ENSG00000092203.15	TOX4	chr14	21476597	21499175	protein_coding	+	22578	2005.39	-0.0612513	0.308526	1
ENSG00000092208.19	GEMIN2	chr14	39114285	39136973	protein_coding	+	22688	155.078	0.0432005	0.772136	1
ENSG00000092295.12	TGM1	chr14	24249114	24264432	protein_coding	-	15318	0	NA	NA	NA
ENSG00000092330.18	TINF2	chr14	24239643	24242674	protein_coding	-	3031	0.504594	-1.97525	0.451956	1
ENSG00000092345.14	DAZL	chr3	16586792	16670306	protein_coding	-	83514	11.1814	-0.678599	0.393635	1
ENSG00000092377.15	TBL1Y	chrY	6910686	7101970	protein_coding	+	191284	0.0780909	-0.836985	0.842268	1
ENSG00000092421.17	SEMA6A	chr5	116443555	116574823	protein_coding	-	131268	148.747	0.171056	0.409357	1
ENSG00000092439.16	TRPM7	chr15	50552473	50686797	protein_coding	-	134324	2422.1	-0.173984	0.0172787	0.172945
ENSG00000092445.12	TYRO3	chr15	41557675	41583589	protein_coding	+	25914	2.44203	-0.647676	0.71428	1
ENSG00000092470.12	WDR76	chr15	43826980	43868412	protein_coding	+	41432	310.825	0.302132	0.0853211	0.495592
ENSG00000092529.25	CAPN3	chr15	42359498	42412949	protein_coding	+	53451	506.858	0.574001	0.00231086	0.0399696
ENSG00000092531.10	SNAP23	chr15	42491233	42545356	protein_coding	+	54123	2763.61	-0.101707	0.318588	1
ENSG00000092607.15	TBX15	chr1	118883046	118989556	protein_coding	-	106510	0.384781	-0.832854	0.670557	1
ENSG00000092621.13	PHGDH	chr1	119648411	119744218	protein_coding	+	95807	23.6599	-0.0781338	0.949994	1
ENSG00000092758.18	COL9A3	chr20	62816244	62841159	protein_coding	+	24915	1489.97	0.909428	0.00983877	0.116238
ENSG00000092820.19	EZR	chr6	158765741	158819368	protein_coding	-	53627	12561.7	-0.0359077	0.780344	1
ENSG00000092841.19	MYL6	chr12	56158346	56163496	protein_coding	+	5150	3707.66	0.0324525	0.82651	1
ENSG00000092847.13	AGO1	chr1	35869808	35930532	protein_coding	+	60724	1303.1	-0.0455603	0.574693	1
ENSG00000092850.12	TEKT2	chr1	36084094	36088275	protein_coding	+	4181	1.47147	-1.12855	0.354005	1
ENSG00000092853.14	CLSPN	chr1	35720218	35769978	protein_coding	-	49760	25.5858	-0.179717	0.622412	1
ENSG00000092871.17	RFFL	chr17	35005990	35089319	protein_coding	-	83329	628.002	0.0981465	0.526331	1
ENSG00000092929.12	UNC13D	chr17	75827225	75844552	protein_coding	-	17327	1835.89	0.246477	0.0289176	0.246297
ENSG00000092931.12	MFSD11	chr17	76735865	76781449	protein_coding	+	45584	2620.79	-0.218782	0.102787	0.554498
ENSG00000092964.18	DPYSL2	chr8	26514031	26658178	protein_coding	+	144147	333.268	-0.613033	0.288076	0.982858
ENSG00000092969.12	TGFB2	chr1	218345336	218444619	protein_coding	+	99283	23.4472	-0.770235	0.57492	1
ENSG00000092978.11	GPATCH2	chr1	217426992	217631090	protein_coding	-	204098	183.033	-0.237315	0.110247	0.576937
ENSG00000093000.19	NUP50	chr22	45163925	45188017	protein_coding	+	24092	2225.86	-0.199299	0.0140988	0.149969
ENSG00000093009.11	CDC45	chr22	19479457	19520612	protein_coding	+	41155	3.28293	-0.552234	0.388166	1
ENSG00000093010.15	COMT	chr22	19941371	19969975	protein_coding	+	28604	426.072	-0.0867464	0.473259	1
ENSG00000093072.18	ADA2	chr22	17178790	17258235	protein_coding	-	79445	2642.78	1.44356	1.51165e-06	0.000145897
ENSG00000093100.13	ENSG00000093100	chr22	17787652	17811497	lncRNA	-	23845	2.83232	0.411726	0.614588	1
ENSG00000093134.15	VNN3	chr6	132722787	132736935	protein_coding	-	14148	15.2927	1.33024	0.0153636	0.159097
ENSG00000093144.19	ECHDC1	chr6	127288712	127343609	protein_coding	-	54897	703.147	-0.411554	0.000571941	0.0140779
[truncated: 59,534 more rows]
